# Supplementary material for: Iris lactea var. chinensis Plant Drought Tolerance Depends on Response of Proline Metabolism, Transcription Factors, Transporters and the ROS Scavenging System
Source: Research Square preprint supplement (doi:10.21203/rs.3.rs-1312283/v1), 2022-02-08
Supplement: Supplementary file 1 [file 1de018d34c6100aa2907ef47.xlsx]

## Sheet: Table S3
Table S3. Up- and down-regulation DEGs in comparison groups R/T
Gene_id	Length	CK	T	R	NR description	GO_id	GO_term	KO_id	KO_name	Pathway_id	Pathway_definition	COG_id	COG_Functional Categories	Swiss-Prot_hit-name	Swiss-Prot_description	Pfam_id	Domain	Domain description
TRINITY_DN41036_c0_g1	372	9.145	0	15.76		------	------	------	------	------	------	------	------	------	------	------	------	------
TRINITY_DN41068_c0_g1	559	3.14	14.565	1.205	PREDICTED: uncharacterized protein LOC102586479 [Solanum tuberosum]	------	------	------	------	------	------	------	------	------	------	------	------	------
TRINITY_DN41652_c0_g1	839	1.155	14.825	1.225	LOW QUALITY PROTEIN: oil body-associated protein 1A-like [Asparagus officinalis]	------	------	------	------	------	------	------	------	gi|1027923650|sp|B4FFZ9.1|OBP1A_MAIZE;	RecName: Full=Oil body-associated protein 1A;	PF06884.8	DUF1264	Protein of unknown function
TRINITY_DN41886_c0_g1	1327	2.845	1.695	9.465	PREDICTED: probable cinnamyl alcohol dehydrogenase 6 [Elaeis guineensis]	GO:0016491;GO:0008270;GO:0016491;GO:0008270;GO:0016491;GO:0008270;GO:0016491;GO:0008270	MF:oxidoreductase activity;MF:zinc ion binding;MF:oxidoreductase activity;MF:zinc ion binding;MF:oxidoreductase activity;MF:zinc ion binding;MF:oxidoreductase activity;MF:zinc ion binding;	K00083	E1.1.1.195	map00940	Phenylpropanoid biosynthesis	COG1064	C:Energy production and conversion	gi|75327567|sp|Q7XWU3.2|CADH6_ORYSJ;	RecName: Full=Probable cinnamyl alcohol dehydrogenase 6; Short=OsCAD6;	PF08240.9;PF00107.23;PF02826.16	ADH_N;ADH_zinc_N;2-Hacid_dh_C	Alcohol dehydrogenase GroES-like domain;Zinc-binding dehydrogenase;D-isomer specific 2-hydroxyacid dehydrogenase, NAD binding domain
TRINITY_DN42069_c0_g1	875	10.155	0.835	52.625	dirigent protein 5-like [Asparagus officinalis]	GO:0048046	CC:apoplast;	------	------	------	------	------	------	gi|75205429|sp|Q9SH66.1|DIR5_ARATH;	RecName: Full=Dirigent protein 5; Short=AtDIR5; Flags: Precursor;	PF03018.11	Dirigent	Dirigent-like protein
TRINITY_DN42490_c0_g1	776	1.765	0	6.755	Tyrosinase [Macleaya cordata]	GO:0046148;GO:0016021;GO:0004097;GO:0046872;GO:0004097;GO:0046872;GO:0004097;GO:0046872	BP:pigment biosynthetic process;CC:integral component of membrane;MF:catechol oxidase activity;MF:metal ion binding;MF:catechol oxidase activity;MF:metal ion binding;MF:catechol oxidase activity;MF:metal ion binding;	K00422	E1.10.3.1	map00950;map00350	Isoquinoline alkaloid biosynthesis;Tyrosine metabolism	------	------	gi|62287130|sp|Q9MB14.2|PPO2_IPOBA;	RecName: Full=Polyphenol oxidase II, chloroplastic; Short=PPO-II; AltName: Full=Catechol oxidase II; Flags: Precursor;	PF12143.5;PF12142.5	PPO1_KFDV;PPO1_DWL	Protein of unknown function;Polyphenol oxidase middle domain
TRINITY_DN42603_c3_g2	665	3.41	2.355	20.29	laccase-3-like [Asparagus officinalis]	GO:0046274;GO:0048046;GO:0005507;GO:0052716	BP:lignin catabolic process;CC:apoplast;MF:copper ion binding;MF:hydroquinon;	K05909	E1.10.3.2	------	------	------	------	gi|122248700|sp|Q2QYS3.1|LAC23_ORYSJ;	RecName: Full=Laccase-23; AltName: Full=Benzenediol:oxygen oxidoreductase 23; AltName: Full=Diphenol oxidase 23; AltName: Full=Urishiol oxidase 23; Flags: Precursor;	PF07731.11	Cu-oxidase_2	Multicopper oxidase
TRINITY_DN42696_c0_g2	1191	1.965	2.135	0.11	putative cysteine protease 1 [Iris x hollandica]	GO:0008234;GO:0008234;GO:0008234;GO:0008234;GO:0008234	MF:cysteine-type peptidase activity;MF:cysteine-type peptidase activity;MF:cysteine-type peptidase activity;MF:cysteine-type peptidase activity;MF:cysteine-type peptidase activity;	K16292	CEP, CYSEP	------	------	------	------	gi|75296543|sp|Q7XWK5.2|SAG39_ORYSJ;	RecName: Full=Senescence-specific cysteine protease SAG39; AltName: Full=Cysteine proteinase SAG39; AltName: Full=Protein SENESCENCE-ASSOCIATED GENE 39; Flags: Precursor;	PF00112.20;PF08246.9;PF03051.12	Peptidase_C1;Inhibitor_I29;Peptidase_C1_2	Papain family cysteine protease;Cathepsin propeptide inhibitor domain;Peptidase C1-like family
TRINITY_DN42793_c0_g1	1577	0.165	1.4	0		------	------	------	------	------	------	------	------	------	------	------	------	------
TRINITY_DN42795_c3_g1	1301	32.905	0.51	6.815	polygalacturonase inhibitor-like [Asparagus officinalis]	------	------	------	------	------	------	------	------	gi|464367|sp|Q05091.1|PGIP_PYRCO;	RecName: Full=Polygalacturonase inhibitor; AltName: Full=Polygalacturonase-inhibiting protein; Short=PGIG; Flags: Precursor;	PF13855.3;PF08263.9;PF12799.4	LRR_8;LRRNT_2;LRR_4	Leucine rich repeat;Leucine rich repeat N-terminal domain;Leucine Rich repeats
TRINITY_DN42917_c4_g1	2659	0.03	0.1	2.065	PREDICTED: beta-galactosidase 11-like [Musa acuminata subsp. malaccensis]	------	------	------	------	------	------	COG1874	G:Carbohydrate transport and metabolism	gi|75136208|sp|Q6ZJJ0.1|BGA11_ORYSJ;	RecName: Full=Beta-galactosidase 11; AltName: Full=Lactase 115; Flags: Precursor;	PF01301.16;PF02140.15;PF13364.3	Glyco_hydro_35;Gal_Lectin;BetaGal_dom4_5	Glycosyl hydrolases family 35;Galactose binding lectin domain;Beta-galactosidase jelly roll domain
TRINITY_DN42975_c4_g1	1068	8.7	1.715	10.94	PREDICTED: bidirectional sugar transporter SWEET17-like isoform X1 [Phoenix dactylifera]	GO:0008643;GO:0016021;GO:0005886	BP:carbohydrate transport;CC:integral component of membrane;CC:plasma membrane;	K15382	SLC50A, SWEET	------	------	------	------	gi|322967649|sp|Q84WN3.2|SWT17_ARATH;	RecName: Full=Bidirectional sugar transporter SWEET17; Short=AtSWEET17; AltName: Full=Protein SUGARS WILL EVENTUALLY BE EXPORTED TRANSPORTERS 17;	PF03083.13	MtN3_slv	Sugar efflux transporter for intercellular exchange
TRINITY_DN43079_c1_g5	1922	0.05	0.085	2.24	PREDICTED: ABC transporter G family member 6-like [Elaeis guineensis]	GO:0016021;GO:0016021;GO:0005524;GO:0016887;GO:0005524;GO:0016887	CC:integral component of membrane;CC:integral component of membrane;MF:ATP binding;MF:ATPase activity;MF:ATP binding;MF:ATPase activity;	------	------	------	------	------	------	gi|75318720|sp|O80946.1|AB1G_ARATH;	RecName: Full=ABC transporter G family member 1; Short=ABC transporter ABCG.1; Short=AtABCG1; AltName: Full=White-brown complex homolog protein 1; Short=AtWBC1;	PF01061.21;PF00005.24;PF13191.3;PF13555.3;PF13481.3	ABC2_membrane;ABC_tran;AAA_16;AAA_29;AAA_25	ABC-2 type transporter;ABC transporter;AAA ATPase domain;P-loop containing region of AAA domain;AAA domain
TRINITY_DN43242_c5_g1	446	6.09	65.295	5.81		------	------	------	------	------	------	------	------	------	------	PF02068.13	Metallothio_PEC	Plant PEC family metallothionein
TRINITY_DN43542_c7_g2	669	2.545	0.68	12.665	uncharacterized protein LOC109851565 [Asparagus officinalis]	------	------	------	------	------	------	------	------	------	------	PF04398.9	DUF538	Protein of unknown function, DUF538
TRINITY_DN43665_c5_g1	1137	0.81	0.445	20.045	PREDICTED: inorganic pyrophosphatase 2 isoform X1 [Phoenix dactylifera]	GO:0016791;GO:0016791;GO:0016791;GO:0016791	MF:phosphatase activity;MF:phosphatase activity;MF:phosphatase activity;MF:phosphatase activity;	K13248	PHOSPHO2	map00750	Vitamin B6 metabolism	------	------	gi|75173366|sp|Q9FZ62.1|PPSP2_ARATH;	RecName: Full=Inorganic pyrophosphatase 2; Short=AtPPsPase2; Short=PPi phosphatase 2; Short=Pyrophosphate-specific phosphatase 2;	PF06888.9;PF12710.4	Put_Phosphatase;HAD	Putative Phosphatase;haloacid dehalogenase-like hydrolase
TRINITY_DN43759_c0_g4	581	251.36	322.655	3.765	22.0 kDa class IV heat shock protein-like [Asparagus officinalis]	------	------	K13993	HSP20	map04141	Protein processing in endoplasmic reticulum	------	------	gi|232282|sp|P30236.1|HSP41_SOYBN;	RecName: Full=22.0 kDa class IV heat shock protein; Flags: Precursor;	PF00011.18	HSP20	Hsp20/alpha crystallin family
TRINITY_DN43843_c1_g2	1243	1.43	1.145	8.51	peroxidase 4-like [Asparagus officinalis]	GO:0042744;GO:0006979;GO:0042744;GO:0006979;GO:0005576;GO:0005576;GO:0020037;GO:0046872;GO:0004601;GO:0020037;GO:0046872;GO:0004601	BP:hydrogen peroxide catabolic process;BP:response to oxidative stress;BP:hydrogen peroxide catabolic process;BP:response to oxidative stress;CC:extracellular region;CC:extracellular region;MF:heme binding;MF:metal ion binding;MF:peroxidase activity;MF:heme binding;MF:metal ion binding;MF:peroxidase activity;	K00430	E1.11.1.7	map00940	Phenylpropanoid biosynthesis	------	------	gi|223635590|sp|A7NY33.1|PER4_VITVI;	RecName: Full=Peroxidase 4; Flags: Precursor;	PF00141.20	peroxidase	Peroxidase
TRINITY_DN43884_c3_g2	1716	2.53	11.435	1.415	probable indole-3-pyruvate monooxygenase YUCCA7 [Asparagus officinalis]	------	------	K11816	YUCCA	map00380	Tryptophan metabolism	COG2072	P:Inorganic ion transport and metabolism	gi|75311248|sp|Q9LKC0.1|YUC5_ARATH;	RecName: Full=Probable indole-3-pyruvate monooxygenase YUCCA5; AltName: Full=Flavin-containing monooxygenase YUCCA5; AltName: Full=Protein SUPPRESSOR OF ER 1;	PF00743.16;PF13738.3;PF13434.3;PF07992.11;PF00070.24;PF13450.3;PF01494.16	FMO-like;Pyr_redox_3;K_oxygenase;Pyr_redox_2;Pyr_redox;NAD_binding_8;FAD_binding_3	Flavin-binding monooxygenase-like;Pyridine nucleotide-disulphide oxidoreductase;L-lysine 6-monooxygenase;Pyridine nucleotide-disulphide oxidoreductase;Pyridine nucleotide-disulphide oxidoreductase;NA;FAD binding domain
TRINITY_DN44008_c1_g1	444	59.335	7.425	68.875	PREDICTED: L-type lectin-domain containing receptor kinase IV.1-like [Elaeis guineensis]	------	------	------	------	------	------	------	------	gi|75318718|sp|O80939.1|LRK41_ARATH;	RecName: Full=L-type lectin-domain containing receptor kinase IV.1; Short=Arabidopsis thaliana lectin-receptor kinase e; Short=AthlecRK-e; Short=LecRK-IV.1; AltName: Full=Lectin Receptor Kinase 1; Flags: Precursor;	------	------	------
TRINITY_DN44073_c1_g2	643	48.545	12.59	0.115		------	------	------	------	------	------	------	------	------	------	------	------	------
TRINITY_DN44109_c5_g2	648	0	0.11	23.77	PREDICTED: polyol transporter 5-like [Musa acuminata subsp. malaccensis]	GO:0016021;GO:0016021;GO:0022857;GO:0022857	CC:integral component of membrane;CC:integral component of membrane;MF:transmembrane transporter activity;MF:transmembrane transporter activity;	------	------	------	------	------	------	gi|118573108|sp|Q8VZ80.2|PLT5_ARATH;	RecName: Full=Polyol transporter 5; AltName: Full=Protein POLYOL TRANSPORTER 5; Short=AtPLT5; AltName: Full=Sugar-proton symporter PLT5;	PF00083.21	Sugar_tr	Sugar
TRINITY_DN44234_c3_g2	1594	3.53	7.195	53.58	Transferase [Macleaya cordata]	GO:0016747;GO:0016747;GO:0016747;GO:0016747	MF:transferase activity, transferring acyl groups other than amino-acyl groups;MF:transferase activity, transferring acyl groups other than amino-acyl groups;MF:transferase activity, transferring acyl groups other than amino-acyl groups;MF:transferase activity, transferring acyl groups other than amino-acyl groups;	K19861	BEBT, AMAT	------	------	------	------	gi|75150383|sp|Q8GT20.1|BEBT_TOBAC;	RecName: Full=Benzyl alcohol O-benzoyltransferase; AltName: Full=Benzoyl coenzyme A:benzyl alcohol benzoyl transferase;	PF02458.12	Transferase	Transferase family
TRINITY_DN44337_c0_g2	1278	1.84	1.62	16.865	PREDICTED: NDR1/HIN1-like protein 12 [Phoenix dactylifera]	GO:0016021;GO:0016021;GO:0016021	CC:integral component of membrane;CC:integral component of membrane;CC:integral component of membrane;	------	------	------	------	------	------	gi|75313493|sp|Q9SJ54.1|NHL12_ARATH;	RecName: Full=NDR1/HIN1-like protein 12;	PF03168.10	LEA_2	Late embryogenesis abundant protein
TRINITY_DN44483_c2_g1	1296	171.695	21.685	158.96	PREDICTED: probable mediator of RNA polymerase II transcription subunit 37e [Fragaria vesca subsp. vesca]	GO:0005524;GO:0005524;GO:0005524;GO:0005524	MF:ATP binding;MF:ATP binding;MF:ATP binding;MF:ATP binding;	K03283	HSPA1_8	map04144;map04141;map03040	Endocytosis;Protein processing in endoplasmic reticulum;Spliceosome	------	------	gi|123620|sp|P27322.1|HSP72_SOLLC;	RecName: Full=Heat shock cognate 70 kDa protein 2;	PF10712.6;PF00012.17	NAD-GH;HSP70	NAD-specific glutamate dehydrogenase;Hsp70 protein
TRINITY_DN44512_c3_g1	922	5.35	5.47	97.635	PREDICTED: 21 kDa protein-like [Phoenix dactylifera]	GO:0004857;GO:0004857	MF:enzyme inhibitor activity;MF:enzyme inhibitor activity;	------	------	------	------	------	------	gi|112717|sp|P17407.1|21KD_DAUCA;	RecName: Full=21 kDa protein; AltName: Full=1.2 protein; Flags: Precursor;	PF04043.12	PMEI	Plant invertase/pectin methylesterase inhibitor
TRINITY_DN44766_c3_g1	1228	369.33	469.555	51.715	PREDICTED: BAG family molecular chaperone regulator 6-like [Phoenix dactylifera]	GO:0051087;GO:0051087	MF:chaperone binding;MF:chaperone binding;	------	------	------	------	------	------	------	------	------	------	------
TRINITY_DN44787_c13_g2	606	0.425	3.635	28.725	uncharacterized protein LOC109721137 [Ananas comosus]	------	------	------	------	------	------	------	------	------	------	------	------	------
TRINITY_DN44873_c0_g2	455	5.34	0.36	27.975	7-deoxyloganetin glucosyltransferase-like [Asparagus officinalis]	------	------	K21374	UGT85A	------	------	------	------	gi|334351205|sp|Q9LMF1.2|U85A3_ARATH;	RecName: Full=UDP-glycosyltransferase 85A3;	------	------	------
TRINITY_DN44873_c0_g4	776	6.78	0.775	30.6	7-deoxyloganetin glucosyltransferase-like [Asparagus officinalis]	GO:0008152;GO:0008152;GO:0008152;GO:0016758;GO:0016758;GO:0016758	BP:metabolic process;BP:metabolic process;BP:metabolic process;MF:transferase activity, transferring hexosyl groups;MF:transferase activity, transferring hexosyl groups;MF:transferase activity, transferring hexosyl groups;	K21374	UGT85A	------	------	------	------	gi|678019175|sp|F8WLS6.1|UGT6_CATRO;	RecName: Full=7-deoxyloganetin glucosyltransferase; AltName: Full=Iridoid 1-O-glucosyltransferase; AltName: Full=UDP-glucose glucosyltransferase 6; Short=CrUGT6; AltName: Full=UDP-glycosyltransferase 85A23;	------	------	------
TRINITY_DN44905_c6_g2	564	9.295	6.595	0		------	------	------	------	------	------	------	------	------	------	------	------	------
TRINITY_DN44925_c0_g1	2311	7.07	26.025	2.205	PREDICTED: amino acid permease 4 [Elaeis guineensis]	GO:0016021;GO:0016021	CC:integral component of membrane;CC:integral component of membrane;	------	------	------	------	------	------	gi|75220717|sp|Q38967.1|AAP2_ARATH;	RecName: Full=Amino acid permease 2; AltName: Full=Amino acid transporter AAP2;	PF01490.15	Aa_trans	Transmembrane amino acid transporter protein
TRINITY_DN44983_c3_g1	1356	0.58	28.18	1.61	PREDICTED: probable plastid-lipid-associated protein 2, chloroplastic [Elaeis guineensis]	------	------	------	------	------	------	------	------	gi|62900682|sp|Q6K439.1|PAP2_ORYSJ;	RecName: Full=Probable plastid-lipid-associated protein 2, chloroplastic; AltName: Full=Fibrillin-like protein 2; Flags: Precursor;	PF04755.9	PAP_fibrillin	PAP_fibrillin
TRINITY_DN45012_c0_g1	1227	2.53	4.945	0.285	PREDICTED: protein EXORDIUM-like 3 [Elaeis guineensis]	------	------	------	------	------	------	------	------	gi|75170643|sp|Q9FHM9.1|EXOL3_ARATH;	RecName: Full=Protein EXORDIUM-like 3; Flags: Precursor;	PF04674.9	Phi_1	Phosphate-induced protein 1 conserved region
TRINITY_DN45189_c2_g1	1390	0.18	0.125	6.47	mitochondrial uncoupling protein 1-like [Asparagus officinalis]	GO:0006839;GO:0016021;GO:0031966	BP:mitochondrial transport;CC:integral component of membrane;CC:mitochondrial membrane;	K15103	UCP2_3, SLC25A8_9	------	------	------	------	gi|75220127|sp|O81845.1|PUMP1_ARATH;	RecName: Full=Mitochondrial uncoupling protein 1; Short=AtPUMP1;	PF00153.24	Mito_carr	Mitochondrial carrier protein
TRINITY_DN45343_c9_g1	875	1.37	0.205	4.045		------	------	------	------	------	------	------	------	------	------	------	------	------
TRINITY_DN45420_c1_g3	2681	0.055	23.715	0.735	uncharacterized protein A4U43_C04F17540 [Asparagus officinalis]	GO:0008152;GO:0008152;GO:0000287;GO:0010333;GO:0000287;GO:0010333	BP:metabolic process;BP:metabolic process;MF:magnesium ion binding;MF:terpene synthase activity;MF:magnesium ion binding;MF:terpene synthase activity;	K15803	GERD	map00909	Sesquiterpenoid and triterpenoid biosynthesis	------	------	gi|410591621|sp|B3TPQ6.1|BCUSY_MAGGA;	RecName: Full=Beta-cubebene synthase; Short=Mg25;	PF03936.13	Terpene_synth_C	Terpene synthase family, metal binding domain
TRINITY_DN45683_c3_g2	1959	0.515	8.655	2.025	Premnaspirodiene oxygenase [Ananas comosus]	GO:0020037;GO:0005506;GO:0004497;GO:0016705;GO:0020037;GO:0005506;GO:0004497;GO:0016705;GO:0020037;GO:0005506;GO:0004497;GO:0016705	MF:heme binding;MF:iron ion binding;MF:monooxygenase activity;MF:oxidoreductase activity, acting on paired donors, with incorporation or reduction of molecular oxygen;MF:heme binding;MF:iron ion binding;MF:monooxygenase activity;MF:oxidoreductase activity, acting on paired donors, with incorporation or reduction of molecular oxygen;MF:heme binding;MF:iron ion binding;MF:monooxygenase activity;MF:…	------	------	------	------	------	------	gi|5915836|sp|P93531.1|C71D7_SOLCH;	RecName: Full=Cytochrome P450 71D7 [Solanum chacoense];	PF00067.19	p450	Cytochrome P450
TRINITY_DN45728_c7_g1	1075	0.285	0.22	6.515		------	------	------	------	------	------	------	------	------	------	------	------	------
TRINITY_DN45763_c5_g7	1024	4.42	4.01	27.245	uncharacterized protein A4U43_C05F9510 [Asparagus officinalis]	GO:0016491	MF:oxidoreductase activity;	K08081	TR1	map00960	Tropane, piperidine and pyridine alkaloid biosynthesis	------	------	gi|75311182|sp|Q9LHT0.1|TRNHF_ARATH;	RecName: Full=Tropinone reductase homolog At5g06060;	PF13561.3;PF00106.22;PF08659.7;PF01370.18	adh_short_C2;adh_short;KR;Epimerase	Enoyl;short chain dehydrogenase;KR domain;NAD dependent epimerase/dehydratase family
TRINITY_DN45878_c2_g2	641	0.44	0.17	8.335		------	------	------	------	------	------	------	------	------	------	------	------	------
TRINITY_DN45975_c2_g1	1455	0.29	0.48	5.74	GDSL esterase/lipase At5g37690 [Asparagus officinalis]	GO:0016788	MF:hydrolase activity, acting on ester bonds;	------	------	------	------	COG3240	I:Lipid transport and metabolism	gi|75170657|sp|Q9FHQ1.1|GDL80_ARATH;	RecName: Full=GDSL esterase/lipase At5g37690; AltName: Full=Extracellular lipase At5g37690; Flags: Precursor;	PF00657.19	Lipase_GDSL	GDSL-like Lipase/Acylhydrolase
TRINITY_DN45983_c4_g3	721	83.485	27.135	943.66		------	------	------	------	------	------	------	------	------	------	PF02496.13	ABA_WDS	ABA/WDS induced protein
TRINITY_DN45985_c4_g1	1112	4.92	0.36	3.745	LOB domain-containing protein [Zostera marina]	------	------	------	------	------	------	------	------	gi|27805498|sp|Q9M886.1|LBD41_ARATH;	RecName: Full=LOB domain-containing protein 41; AltName: Full=ASYMMETRIC LEAVES 2-like protein 38; Short=AS2-like protein 38;	PF03195.11	DUF260	Protein of unknown function DUF260
TRINITY_DN46049_c3_g2	553	23.565	7.78	45.9		------	------	------	------	------	------	------	------	------	------	------	------	------
TRINITY_DN46145_c4_g1	943	2.02	5.66	0		------	------	------	------	------	------	------	------	------	------	------	------	------
TRINITY_DN46146_c4_g7	1029	0	0.08	12.035	PREDICTED: receptor-like serine/threonine-protein kinase SD1-8 isoform X3 [Elaeis guineensis]	------	------	------	------	------	------	------	------	gi|75311550|sp|Q9LT75.1|PTN2A_ARATH;	RecName: Full=Phosphatidylinositol 3,4,5-trisphosphate 3-phosphatase and protein-tyrosine-phosphatase PTEN2A; AltName: Full=Protein PHOSPHATASE AND TENSIN HOMOLOG 2-a; Short=AtPTEN2; Short=AtPTEN2a;	PF08276.8	PAN_2	PAN-like domain
TRINITY_DN46162_c0_g3	511	3.515	5.025	0	PREDICTED: uncharacterized protein LOC103709737 [Phoenix dactylifera]	GO:0005739;GO:0009536	CC:mitochondrion;CC:plastid;	------	------	------	------	------	------	------	------	------	------	------
TRINITY_DN46504_c5_g1	692	0.135	5.245	65.83	PREDICTED: probable metal-nicotianamine transporter YSL12 isoform X1 [Phoenix dactylifera]	GO:0055085;GO:0055085;GO:0016021;GO:0016021	BP:transmembrane transport;BP:transmembrane transport;CC:integral component of membrane;CC:integral component of membrane;	------	------	------	------	------	------	gi|224493430|sp|Q0J932.2|YSL10_ORYSJ;	RecName: Full=Probable metal-nicotianamine transporter YSL10; AltName: Full=Protein YELLOW STRIPE LIKE 10; Short=OsYSL10;	PF03169.12	OPT	OPT oligopeptide transporter protein
TRINITY_DN46653_c0_g1	1766	26.745	12.895	69.905	PREDICTED: geraniol 8-hydroxylase-like [Elaeis guineensis]	GO:0016021;GO:0016021;GO:0020037;GO:0005506;GO:0004497;GO:0016705;GO:0020037;GO:0005506;GO:0004497;GO:0016705	CC:integral component of membrane;CC:integral component of membrane;MF:heme binding;MF:iron ion binding;MF:monooxygenase activity;MF:oxidoreductase activity, acting on paired donors, with incorporation or reduction of molecular oxygen;MF:heme binding;MF:iron ion binding;MF:monooxygenase activity;MF:oxidoreductase activity, acting on paired donors, with incorporation or reduction of molecular oxyg…	------	------	------	------	------	------	gi|5915832|sp|O64637.1|C76C2_ARATH;	RecName: Full=Cytochrome P450 76C2; AltName: Full=Protein YELLOW-LEAF-SPECIFIC GENE 6;	PF00067.19	p450	Cytochrome P450
TRINITY_DN46943_c0_g1	1298	2.745	0	3.4	apoptosis-inducing factor homolog B-like [Asparagus officinalis]	GO:0016491;GO:0016491	MF:oxidoreductase activity;MF:oxidoreductase activity;	------	------	------	------	COG0446	C:Energy production and conversion	gi|74996854|sp|Q54NS9.1|AIFA_DICDI;	RecName: Full=Apoptosis-inducing factor homolog A;	PF07992.11;PF00070.24;PF13434.3;PF13738.3	Pyr_redox_2;Pyr_redox;K_oxygenase;Pyr_redox_3	Pyridine nucleotide-disulphide oxidoreductase;Pyridine nucleotide-disulphide oxidoreductase;L-lysine 6-monooxygenase;Pyridine nucleotide-disulphide oxidoreductase
TRINITY_DN46963_c0_g3	788	2.26	0.91	10.56	cycloartenol synthase 2-like [Asparagus officinalis]	GO:0016866;GO:0016866;GO:0016866	MF:intramolecular transferase activity;MF:intramolecular transferase activity;MF:intramolecular transferase activity;	K01853	CAS1	map00100	Steroid biosynthesis	------	------	gi|75266680|sp|Q9SXV6.1|CAS1_GLYGL;	RecName: Full=Cycloartenol synthase;	PF13249.3;PF00432.18;PF13243.3	SQHop_cyclase_N;Prenyltrans;SQHop_cyclase_C	Squalene-hopene cyclase N-terminal domain;Prenyltransferase and squalene oxidase repeat;Squalene-hopene cyclase C-terminal domain
TRINITY_DN47012_c5_g4	3331	1.175	0.09	1.875	protein NLP1-like [Asparagus officinalis]	GO:0006355;GO:0006351;GO:0005634;GO:0003677	BP:regulation of transcription, DNA-templated;BP:transcription, DNA-templated;CC:nucleus;MF:DNA binding;	------	------	------	------	------	------	gi|313471347|sp|Q10S83.1|NLP1_ORYSJ;	RecName: Full=Protein NLP1; Short=OsNLP1; AltName: Full=NIN-like protein 1; AltName: Full=Nodule inception protein-like protein 1;	PF02042.12;PF00564.21	RWP-RK;PB1	RWP-RK domain;PB1 domain
TRINITY_DN47037_c1_g1	979	14.19	13.62	130.32	PREDICTED: geraniol 8-hydroxylase-like [Elaeis guineensis]	------	------	------	------	------	------	------	------	gi|584998|sp|P37120.1|C75A2_SOLME;	RecName: Full=Flavonoid 3',5'-hydroxylase; Short=F3'5'H; AltName: Full=CYPLXXVA2; AltName: Full=Cytochrome P450 75A2; AltName: Full=P-450EG1 [Solanum melongena];	PF00067.19	p450	Cytochrome P450
TRINITY_DN47037_c1_g2	565	12.705	3.17	54.875	PREDICTED: geraniol 8-hydroxylase-like [Elaeis guineensis]	GO:0016021;GO:0020037;GO:0005506;GO:0016705;GO:0020037;GO:0005506;GO:0004497;GO:0016705	CC:integral component of membrane;MF:heme binding;MF:iron ion binding;MF:oxidoreductase activity, acting on paired donors, with incorporation or reduction of molecular oxygen;MF:heme binding;MF:iron ion binding;MF:monooxygenase activity;MF:oxidoreductase activity, acting on paired donors, with incorporation or reduction of molecular oxygen;	------	------	------	------	------	------	gi|403399733|sp|D1MI46.1|C76BA_SWEMU;	RecName: Full=Geraniol 8-hydroxylase; AltName: Full=Cytochrome P450 76B10; AltName: Full=Geraniol 10-hydroxylase; Short=SmG10H;	PF00067.19	p450	Cytochrome P450
TRINITY_DN47086_c1_g2	1242	34.955	8.005	146.41	PREDICTED: zinc transporter 5-like isoform X1 [Musa acuminata subsp. malaccensis]	GO:0016021;GO:0016021;GO:0016021;GO:0005385;GO:0005385;GO:0005385	CC:integral component of membrane;CC:integral component of membrane;CC:integral component of membrane;MF:zinc ion transmembrane transporter activity;MF:zinc ion transmembrane transporter activity;MF:zinc ion transmembrane transporter activity;	K14709	SLC39A1_2_3, ZIP1_2_3	------	------	------	------	gi|75261633|sp|Q6L8G0.1|ZIP5_ORYSJ;	RecName: Full=Zinc transporter 5; AltName: Full=ZRT/IRT-like protein 5; Short=OsZIP5; Flags: Precursor;	PF02535.19	Zip	ZIP Zinc transporter
TRINITY_DN47364_c2_g3	767	0	0	7.51	expansin-A1 [Carica papaya]	GO:0009664;GO:0009664;GO:0005618;GO:0005576;GO:0016020;GO:0005618;GO:0005576;GO:0016020	BP:plant-type cell wall organization;BP:plant-type cell wall organization;CC:cell wall;CC:extracellular region;CC:membrane;CC:cell wall;CC:extracellular region;CC:membrane;	------	------	------	------	------	------	gi|115502385|sp|O80622.2|EXP15_ARATH;	RecName: Full=Expansin-A15; Short=AtEXPA15; AltName: Full=Alpha-expansin-15; Short=At-EXP15; Short=AtEx15; AltName: Full=Ath-ExpAlpha-1.3; Flags: Precursor;	PF01357.18;PF03330.15	Pollen_allerg_1;DPBB_1	Pollen allergen;Lytic transglycolase
TRINITY_DN47370_c0_g1	1304	12.615	859.99	24.265		------	------	------	------	------	------	------	------	------	------	PF00257.16	Dehydrin	Dehydrin
TRINITY_DN47370_c0_g2	490	16.38	2427.53	47.595		------	------	------	------	------	------	------	------	------	------	PF00257.16	Dehydrin	Dehydrin
TRINITY_DN47423_c3_g1	981	28.795	0.655	16.235	probable LRR receptor-like serine/threonine-protein kinase At3g47570 [Jatropha curcas]	GO:0016021;GO:0016021;GO:0005524;GO:0004674;GO:0005524;GO:0004674	CC:integral component of membrane;CC:integral component of membrane;MF:ATP binding;MF:protein serine/threonine kinase activity;MF:ATP binding;MF:protein serine/threonine kinase activity;	------	------	------	------	------	------	gi|75339043|sp|Q9ZUI0.1|Y2241_ARATH;	RecName: Full=Putative leucine-rich repeat receptor-like serine/threonine-protein kinase At2g24130; Flags: Precursor;	------	------	------
TRINITY_DN47643_c0_g1	375	24.445	4.04	47.175	geraniol 8-hydroxylase-like [Ananas comosus]	GO:0016021;GO:0016021;GO:0020037;GO:0005506;GO:0004497;GO:0016705;GO:0020037;GO:0005506;GO:0004497;GO:0016705	CC:integral component of membrane;CC:integral component of membrane;MF:heme binding;MF:iron ion binding;MF:monooxygenase activity;MF:oxidoreductase activity, acting on paired donors, with incorporation or reduction of molecular oxygen;MF:heme binding;MF:iron ion binding;MF:monooxygenase activity;MF:oxidoreductase activity, acting on paired donors, with incorporation or reduction of molecular oxyg…	------	------	------	------	------	------	gi|5921185|sp|O64636.1|C76C1_ARATH;	RecName: Full=Cytochrome P450 76C1;	PF00067.19	p450	Cytochrome P450
TRINITY_DN48012_c2_g2	1663	0	0	1.915	PREDICTED: scarecrow-like protein 8 [Phoenix dactylifera]	GO:0006355;GO:0006351;GO:0006355;GO:0006351;GO:0006355;GO:0006351;GO:0006355;GO:0006351;GO:0006355;GO:0006351	BP:regulation of transcription, DNA-templated;BP:transcription, DNA-templated;BP:regulation of transcription, DNA-templated;BP:transcription, DNA-templated;BP:regulation of transcription, DNA-templated;BP:transcription, DNA-templated;BP:regulation of transcription, DNA-templated;BP:transcription, DNA-templated;BP:regulation of transcription, DNA-templated;BP:transcription, DNA-templated;	------	------	------	------	------	------	gi|75173299|sp|Q9FYR7.1|SCL8_ARATH;	RecName: Full=Scarecrow-like protein 8; Short=AtSCL8; AltName: Full=GRAS family protein 30; Short=AtGRAS-30;	PF03514.11	GRAS	GRAS domain family
TRINITY_DN48145_c0_g10	2423	0.125	0.065	1.42	PREDICTED: leucine-rich repeat receptor-like protein kinase TDR [Phoenix dactylifera]	GO:0016021;GO:0016021;GO:0005524;GO:0004674;GO:0005524;GO:0004674	CC:integral component of membrane;CC:integral component of membrane;MF:ATP binding;MF:protein serine/threonine kinase activity;MF:ATP binding;MF:protein serine/threonine kinase activity;	------	------	------	------	------	------	gi|75333913|sp|Q9FII5.1|TDR_ARATH;	RecName: Full=Leucine-rich repeat receptor-like protein kinase TDR; AltName: Full=Protein PHLOEM INTERCALATED WITH XYLEM; AltName: Full=Tracheary element differentiation inhibitory factor receptor; Short=AtTDR; Short=TDIF receptor; Flags: Precursor;	PF00069.22;PF07714.14;PF13855.3;PF12799.4;PF01636.20	Pkinase;Pkinase_Tyr;LRR_8;LRR_4;APH	Protein kinase domain;Protein tyrosine kinase;Leucine rich repeat;Leucine Rich repeats;Phosphotransferase enzyme family
TRINITY_DN48311_c4_g10	710	14.98	8.14	37.715	histone H2A [Sorghum bicolor]	GO:0006342;GO:0006342;GO:0006342;GO:0000790;GO:0000786;GO:0000790;GO:0000786;GO:0000786;GO:0005634;GO:0000786;GO:0005634;GO:0000790;GO:0000786;GO:0003677;GO:0046982;GO:0003677;GO:0046982;GO:0003677;GO:0046982;GO:0003677;GO:0046982;GO:0003677;GO:0046982	BP:chromatin silencing;BP:chromatin silencing;BP:chromatin silencing;CC:nuclear chromatin;CC:nucleosome;CC:nuclear chromatin;CC:nucleosome;CC:nucleosome;CC:nucleus;CC:nucleosome;CC:nucleus;CC:nuclear chromatin;CC:nucleosome;MF:DNA binding;MF:protein heterodimerization activity;MF:DNA binding;MF:protein heterodimerization activity;MF:DNA binding;MF:protein heterodimerization activity;MF:DNA bindin…	K11251	H2A	------	------	COG5262	B:Chromatin structure and dynamics	gi|122007|sp|P19177.1|H2A_PETCR;	RecName: Full=Histone H2A;	PF16211.2;PF00125.21;PF00808.20	Histone_H2A_C;Histone;CBFD_NFYB_HMF	C-terminus of histone H2A;Core histone H2A/H2B/H3/H4;Histone-like transcription factor
TRINITY_DN48317_c12_g2	469	56.115	349.395	21.725		------	------	------	------	------	------	------	------	------	------	------	------	------
TRINITY_DN48320_c3_g7	843	42.37	5.465	40.02	glutaredoxin domain-containing cysteine-rich protein CG12206 isoform X1 [Phalaenopsis equestris]	GO:0045454;GO:0045454;GO:0005623;GO:0005623;GO:0009055;GO:0015035;GO:0009055;GO:0015035	BP:cell redox homeostasis;BP:cell redox homeostasis;CC:cell;CC:cell;MF:electron carrier activity;MF:protein disulfide oxidoreductase activity;MF:electron carrier activity;MF:protein disulfide oxidoreductase activity;	K17479	GRXCR1	------	------	------	------	gi|75273210|sp|Q9LH89.1|Y3885_ARATH;	RecName: Full=Uncharacterized protein At3g28850;	PF00462.21	Glutaredoxin	Glutaredoxin
TRINITY_DN48436_c5_g1	1016	2.645	0.055	2.87		------	------	------	------	------	------	------	------	------	------	------	------	------
TRINITY_DN48568_c2_g5	432	457.08	4.395	1035.77		------	------	------	------	------	------	------	------	------	------	------	------	------
TRINITY_DN48682_c4_g1	498	8.93	84.115	14.635	uncharacterized protein LOC110112773 [Dendrobium catenatum]	------	------	------	------	------	------	------	------	------	------	------	------	------
TRINITY_DN48790_c1_g1	1761	21.64	7.4	50.925	hypothetical protein ACMD2_14607 [Ananas comosus]	------	------	------	------	------	------	------	------	------	------	------	------	------
TRINITY_DN48856_c13_g2	692	2.875	11.04	0.26	PREDICTED: transcription factor ILI3-like [Oryza sativa Japonica Group]	GO:0046983;GO:0046983;GO:0046983	MF:protein dimerization activity;MF:protein dimerization activity;MF:protein dimerization activity;	------	------	------	------	------	------	gi|122247481|sp|Q10R47.1|ILI3_ORYSJ;	RecName: Full=Transcription factor ILI3; Short=OsILI3; AltName: Full=Basic helix-loop-helix protein 153; Short=OsbHLH153; AltName: Full=Protein INCREASED LEAF INCLINATION 3; AltName: Full=bHLH transcription factor bHLH153 >gi|635552528|sp|A2XD15.1|ILI3_ORYSI RecName: Full=Transcription factor ILI3; AltName: Full=Basic helix-loop-helix protein 153; AltName: Full=Protein INCREASED LEAF INCLINATION …	PF00010.23	HLH	Helix-loop-helix DNA-binding domain
TRINITY_DN48943_c3_g1	646	3.67	69.565	5.96	PREDICTED: uncharacterized protein LOC105041167 [Elaeis guineensis]	GO:0016021;GO:0016021	CC:integral component of membrane;CC:integral component of membrane;	------	------	------	------	------	------	------	------	------	------	------
TRINITY_DN48972_c0_g1	742	21.35	0.66	8.345	receptor-like serine/threonine-protein kinase SD1-8 [Phalaenopsis equestris]	------	------	K04733	IRAK4	------	------	------	------	gi|134530|sp|P22552.1|SLSG1_BRAOA;	RecName: Full=S-locus-specific glycoprotein BS29-1; Flags: Precursor;	PF00954.17;PF08276.8	S_locus_glycop;PAN_2	S-locus glycoprotein domain;PAN-like domain
TRINITY_DN49018_c3_g1	2092	8.51	5.615	0.66		------	------	------	------	------	------	------	------	------	------	------	------	------
TRINITY_DN49288_c1_g1	544	37.62	9.77	76.6	histone H2A [Zea mays]	GO:0000786;GO:0005634;GO:0000786;GO:0005634;GO:0000786;GO:0005634;GO:0000786;GO:0005634;GO:0000786;GO:0005634;GO:0003677;GO:0046982;GO:0003677;GO:0046982;GO:0003677;GO:0046982;GO:0003677;GO:0046982;GO:0003677;GO:0046982	CC:nucleosome;CC:nucleus;CC:nucleosome;CC:nucleus;CC:nucleosome;CC:nucleus;CC:nucleosome;CC:nucleus;CC:nucleosome;CC:nucleus;MF:DNA binding;MF:protein heterodimerization activity;MF:DNA binding;MF:protein heterodimerization activity;MF:DNA binding;MF:protein heterodimerization activity;MF:DNA binding;MF:protein heterodimerization activity;MF:DNA binding;MF:protein heterodimerization activity;	K01338;K11251	lon;H2A	------	------	COG5262	B:Chromatin structure and dynamics	gi|729671|sp|P40280.1|H2A_MAIZE;	RecName: Full=Histone H2A;	PF16211.2;PF00125.21;PF00808.20	Histone_H2A_C;Histone;CBFD_NFYB_HMF	C-terminus of histone H2A;Core histone H2A/H2B/H3/H4;Histone-like transcription factor
TRINITY_DN49504_c2_g4	876	8.01	16.14	290.605	putative thiamine biosynthesis protein [Oryza sativa Japonica Group]	GO:0009228;GO:0052837;GO:0006950;GO:0009228;GO:0052837;GO:0005829;GO:0009507;GO:0005829;GO:0005506;GO:0005506	BP:thiamine biosynthetic process;BP:thiazole biosynthetic process;BP:response to stress;BP:thiamine biosynthetic process;BP:thiazole biosynthetic process;CC:cytosol;CC:chloroplast;CC:cytosol;MF:iron ion binding;MF:iron ion binding;	K03146	THI4, THI1	map00730	Thiamine metabolism	------	------	gi|378524288|sp|F6H9A9.1|THI41_VITVI;	RecName: Full=Thiamine thiazole synthase 1, chloroplastic; AltName: Full=Thiazole biosynthetic enzyme 1; Flags: Precursor;	------	------	------
TRINITY_DN49553_c0_g2	967	13.82	35.395	9.365	PREDICTED: miraculin-like [Musa acuminata subsp. malaccensis]	GO:0004866	MF:endopeptidase inhibitor activity;	------	------	------	------	------	------	gi|6166552|sp|P13087.3|MIRA_SYNDU;	RecName: Full=Miraculin; Short=MIR; Flags: Precursor [Synsepalum dulcificum];	PF00197.15	Kunitz_legume	Trypsin and protease inhibitor
TRINITY_DN49585_c1_g1	1337	0.84	0	12.945	PREDICTED: auxin efflux carrier component 5 [Phoenix dactylifera]	GO:0009734;GO:0055085;GO:0009734;GO:0055085;GO:0016021;GO:0016021	BP:auxin-activated signaling pathway;BP:transmembrane transport;BP:auxin-activated signaling pathway;BP:transmembrane transport;CC:integral component of membrane;CC:integral component of membrane;	K13947	PIN	------	------	------	------	gi|42558880|sp|Q9FFD0.2|PIN5_ARATH;	RecName: Full=Auxin efflux carrier component 5; Short=AtPIN5;	PF03547.15	Mem_trans	Membrane transport protein
TRINITY_DN49620_c0_g2	1594	1.58	0.88	8.56	alpha/beta-Hydrolases superfamily protein [Zea mays]	GO:0016021;GO:0016021;GO:0016787;GO:0016787	CC:integral component of membrane;CC:integral component of membrane;MF:hydrolase activity;MF:hydrolase activity;	------	------	------	------	------	------	gi|1723926|sp|P53118.1|ROG1_YEAST;	RecName: Full=Putative lipase ROG1; AltName: Full=Revertant of glycogen synthase kinase mutation protein 1;	PF05057.11	DUF676	Putative serine esterase
TRINITY_DN49685_c5_g2	616	2.695	108.13	15.805	thaumatin-like protein 1b [Ananas comosus]	------	------	------	------	------	------	------	------	gi|25091405|sp|P83332.1|TLP1_PRUPE;	RecName: Full=Thaumatin-like protein 1; AltName: Full=PpAZ44; Flags: Precursor [Prunus persica];	PF00314.14	Thaumatin	Thaumatin family
TRINITY_DN49840_c2_g1	279	0	0	312.69		------	------	------	------	------	------	------	------	------	------	------	------	------
TRINITY_DN49865_c2_g1	1884	0.31	0.23	4.365		------	------	------	------	------	------	------	------	------	------	------	------	------
TRINITY_DN49996_c1_g1	1018	8.26	21.96	0.34	uncharacterized protein A4U43_C10F4520 [Asparagus officinalis]	------	------	K15382	SLC50A, SWEET	------	------	------	------	gi|122204154|sp|Q2QR07.1|SWT13_ORYSJ;	RecName: Full=Bidirectional sugar transporter SWEET13; Short=OsSWEET13;	PF03083.13	MtN3_slv	Sugar efflux transporter for intercellular exchange
TRINITY_DN50120_c6_g1	639	5.52	104.345	3.9	PREDICTED: uncharacterized protein LOC109348691 isoform X1 [Lupinus angustifolius]	------	------	------	------	------	------	------	------	------	------	------	------	------
TRINITY_DN50301_c1_g1	1009	19.36	162.95	13.99	PREDICTED: cinnamoyl-CoA reductase 1 [Elaeis guineensis]	GO:0016621;GO:0050662	MF:cinnamoyl-CoA reductase activity;MF:coenzyme binding;	------	------	------	------	COG0451	M:Cell wall/membrane/envelope biogenesis	gi|75313115|sp|Q9S9N9.1|CCR1_ARATH;	RecName: Full=Cinnamoyl-CoA reductase 1; Short=AtCCR1; AltName: Full=Protein IRREGULAR XYLEM 4;	PF01370.18;PF01073.16;PF16363.2;PF13460.3;PF02719.12;PF05368.10;PF08659.7;PF07993.9;PF04321.14;PF00106.22	Epimerase;3Beta_HSD;GDP_Man_Dehyd;NAD_binding_10;Polysacc_synt_2;NmrA;KR;NAD_binding_4;RmlD_sub_bind;adh_short	NAD dependent epimerase/dehydratase family;3-beta hydroxysteroid dehydrogenase/isomerase family;GDP-mannose 4,6 dehydratase;NA;Polysaccharide biosynthesis protein;NmrA-like family;KR domain;Male sterility protein;RmlD substrate binding domain;short chain dehydrogenase
TRINITY_DN50447_c1_g1	404	1.21	36.115	0.345	LOW QUALITY PROTEIN: heptahelical transmembrane protein ADIPOR1-like [Asparagus officinalis]	------	------	K07297	ADIPOR	------	------	------	------	gi|75163774|sp|Q93ZH9.1|HHP1_ARATH;	RecName: Full=Heptahelical transmembrane protein 1; AltName: Full=PAQR family protein HHP1;	PF03006.17	HlyIII	Haemolysin-III related
TRINITY_DN50477_c2_g1	1541	10.43	11.29	1.37	GDSL esterase/lipase At5g55050-like [Asparagus officinalis]	GO:0016788	MF:hydrolase activity, acting on ester bonds;	------	------	------	------	------	------	gi|75170788|sp|Q9FIA1.1|GDL87_ARATH;	RecName: Full=GDSL esterase/lipase At5g55050; AltName: Full=Extracellular lipase At5g55050; Flags: Precursor;	PF00657.19	Lipase_GDSL	GDSL-like Lipase/Acylhydrolase
TRINITY_DN50582_c1_g1	646	4.535	38.235	5.715	PREDICTED: uncharacterized protein LOC103975117 [Musa acuminata subsp. malaccensis]	------	------	------	------	------	------	------	------	------	------	------	------	------
TRINITY_DN50610_c3_g4	508	0.845	10.35	0.285		------	------	------	------	------	------	------	------	------	------	------	------	------
TRINITY_DN50755_c0_g4	1195	0.605	2.38	25.85	PREDICTED: uncharacterized protein LOC105052151 [Elaeis guineensis]	GO:0042744;GO:0006979;GO:0020037;GO:0046872;GO:0004601	BP:hydrogen peroxide catabolic process;BP:response to oxidative stress;MF:heme binding;MF:metal ion binding;MF:peroxidase activity;	K00430	E1.11.1.7	map00940	Phenylpropanoid biosynthesis	------	------	gi|25453190|sp|O23044.1|PER3_ARATH;	RecName: Full=Peroxidase 3; Short=Atperox P3; AltName: Full=ATPRC; AltName: Full=RCI3A; AltName: Full=Rare cold-inducible protein; Flags: Precursor;	PF00141.20	peroxidase	Peroxidase
TRINITY_DN51074_c1_g2	873	1.265	1.085	13.58	chalcone synthase [Iris domestica]	GO:0009058;GO:0009058;GO:0016747;GO:0016747	BP:biosynthetic process;BP:biosynthetic process;MF:transferase activity, transferring acyl groups other than amino-acyl groups;MF:transferase activity, transferring acyl groups other than amino-acyl groups;	K00660	CHS	map04712;map00941	Circadian rhythm - plant;Flavonoid biosynthesis	------	------	gi|1705839|sp|P51080.1|CHS7_MEDSA;	RecName: Full=Chalcone synthase; AltName: Full=Naringenin-chalcone synthase;	PF02797.12;PF00195.16;PF08541.7;PF08545.7	Chal_sti_synt_C;Chal_sti_synt_N;ACP_syn_III_C;ACP_syn_III	Chalcone and stilbene synthases, C-terminal domain;Chalcone and stilbene synthases, N-terminal domain;3-Oxoacyl-[acyl-carrier-protein;3-Oxoacyl-[acyl-carrier-protein
TRINITY_DN51161_c1_g2	1785	0.25	0.06	4.195	PREDICTED: lysosomal Pro-X carboxypeptidase-like [Nelumbo nucifera]	GO:0006508;GO:0004180;GO:0008236;GO:0004180;GO:0008236;GO:0008239;GO:0008236	BP:proteolysis;MF:carboxypeptidase activity;MF:serine-type peptidase activity;MF:carboxypeptidase activity;MF:serine-type peptidase activity;MF:dipeptidyl-peptidase activity;MF:serine-type peptidase activity;	K01285	PRCP	------	------	------	------	gi|122137021|sp|Q2TA14.1|PCP_BOVIN;	RecName: Full=Lysosomal Pro-X carboxypeptidase; AltName: Full=Proline carboxypeptidase; AltName: Full=Prolylcarboxypeptidase; Short=PRCP; Flags: Precursor;	PF05577.9;PF12146.5;PF00561.17;PF11144.5	Peptidase_S28;Hydrolase_4;Abhydrolase_1;DUF2920	Serine carboxypeptidase S28;Serine aminopeptidase, S33;alpha/beta hydrolase fold;Protein of unknown function
TRINITY_DN51184_c5_g1	827	7.59	13.205	0.57	putative mannitol dehydrogenase [Apostasia shenzhenica]	GO:0045551;GO:0052747;GO:0008270;GO:0016491;GO:0008270;GO:0016491	MF:cinnamyl-alcohol dehydrogenase activity;MF:sinapyl alcohol dehydrogenase activity;MF:zinc ion binding;MF:oxidoreductase activity;MF:zinc ion binding;MF:oxidoreductase activity;	K00083	E1.1.1.195	map00940	Phenylpropanoid biosynthesis	COG1064	C:Energy production and conversion	gi|10720088|sp|O82515.1|MTDH_MEDSA;	RecName: Full=Probable mannitol dehydrogenase; AltName: Full=NAD-dependent mannitol dehydrogenase;	PF08240.9;PF02826.16;PF00107.23	ADH_N;2-Hacid_dh_C;ADH_zinc_N	Alcohol dehydrogenase GroES-like domain;D-isomer specific 2-hydroxyacid dehydrogenase, NAD binding domain;Zinc-binding dehydrogenase
TRINITY_DN51463_c0_g1	2503	4.31	2.97	0.18	PREDICTED: glycine dehydrogenas	GO:0006546;GO:0006546;GO:0005739;GO:0005739;GO:0004375;GO:0004375	BP:glycine catabolic process;BP:glycine catabolic process;CC:mitochondrion;CC:mitochondrion;MF:glycine dehydrogenas;MF:glycine dehydrogenas;	K00281	GLDC, gcvP	map00630;map00260	Glyoxylate and dicarboxylate metabolism;Glycine, serine and threonine metabolism	------	------	gi|121083|sp|P26969.1|GCSP_PEA;	RecName: Full=Glycine dehydrogenase;	PF02347.13	GDC-P	Glycine cleavage system P-protein
TRINITY_DN51468_c7_g2	2120	49.35	21.84	166.165	cytochrome P450 [Chlorophytum borivilianum]	GO:0020037;GO:0005506;GO:0004497;GO:0016705	MF:heme binding;MF:iron ion binding;MF:monooxygenase activity;MF:oxidoreductase activity, acting on paired donors, with incorporation or reduction of molecular oxygen;	K09587	CYP90B1, DWF4	map00905	Brassinosteroid biosynthesis	------	------	gi|332278166|sp|O64989.2|C90B1_ARATH;	RecName: Full=Cytochrome P450 90B1; AltName: Full=Protein DWARF 4; Short=Dwarf4; AltName: Full=Steroid 22-alpha-hydroxylase;	PF00067.19	p450	Cytochrome P450
TRINITY_DN51542_c3_g2	1191	2.375	1.67	7.645		------	------	------	------	------	------	------	------	------	------	------	------	------
TRINITY_DN51701_c1_g3	1837	0.07	0.115	8.515	organic cation/carnitine transporter 2-like [Asparagus officinalis]	GO:0016021;GO:0022857	CC:integral component of membrane;MF:transmembrane transporter activity;	------	------	------	------	------	------	gi|75219810|sp|O64515.1|OCT2_ARATH;	RecName: Full=Organic cation/carnitine transporter 2; Short=AtOCT2;	PF00083.21;PF07690.13	Sugar_tr;MFS_1	Sugar;Major Facilitator Superfamily
TRINITY_DN51749_c0_g1	1247	0.7	24.45	0.26		------	------	------	------	------	------	------	------	------	------	------	------	------
TRINITY_DN51802_c1_g3	1147	1.805	2.24	0.075		------	------	------	------	------	------	------	------	------	------	------	------	------
TRINITY_DN52105_c1_g2	462	0.245	19.145	106.83	PREDICTED: uncharacterized protein LOC105054116 isoform X2 [Elaeis guineensis]	------	------	------	------	------	------	------	------	------	------	------	------	------
TRINITY_DN52383_c0_g3	1250	14.34	8.79	65.165	tropinone reductase homolog At5g06060-like [Ananas comosus]	------	------	K08081	TR1	map00960	Tropane, piperidine and pyridine alkaloid biosynthesis	------	------	gi|75315962|sp|Q9ZW19.1|TRNHC_ARATH;	RecName: Full=Tropinone reductase homolog At2g29360;	PF00106.22;PF13561.3;PF08659.7	adh_short;adh_short_C2;KR	short chain dehydrogenase;Enoyl;KR domain
TRINITY_DN52400_c0_g1	1939	0.09	4.535	0.01	PREDICTED: probable polyol transporter 6 [Phoenix dactylifera]	GO:0016021;GO:0022857	CC:integral component of membrane;MF:transmembrane transporter activity;	------	------	------	------	------	------	gi|118573109|sp|Q8GXR2.2|PLT6_ARATH;	RecName: Full=Probable polyol transporter 6;	PF00083.21;PF07690.13;PF06609.10	Sugar_tr;MFS_1;TRI12	Sugar;Major Facilitator Superfamily;Fungal trichothecene efflux pump
TRINITY_DN52455_c0_g3	1422	5.7	1.485	11.2	PREDICTED: LOW QUALITY PROTEIN: uncharacterized protein At1g01500-like [Elaeis guineensis]	GO:0016021;GO:0016021	CC:integral component of membrane;CC:integral component of membrane;	------	------	------	------	------	------	gi|75150621|sp|Q8GUH2.1|Y1015_ARATH;	RecName: Full=Uncharacterized protein At1g01500;	------	------	------
TRINITY_DN52504_c5_g3	748	3.515	193.695	5.545		------	------	------	------	------	------	------	------	------	------	PF00257.16	Dehydrin	Dehydrin
TRINITY_DN52600_c0_g1	1384	14.735	19.615	183.285	PREDICTED: acyl transferase 5-like [Elaeis guineensis]	GO:0016747;GO:0016747;GO:0016747;GO:0016747	MF:transferase activity, transferring acyl groups other than amino-acyl groups;MF:transferase activity, transferring acyl groups other than amino-acyl groups;MF:transferase activity, transferring acyl groups other than amino-acyl groups;MF:transferase activity, transferring acyl groups other than amino-acyl groups;	------	------	------	------	------	------	gi|28558088|sp|Q8LL69.1|DBNBT_TAXCA;	RecName: Full=3'-N-debenzoyl-2'-deoxytaxol N-benzoyltransferase; Short=DBTNBT [Taxus canadensis];	PF02458.12	Transferase	Transferase family
TRINITY_DN52717_c1_g1	480	64.285	1.96	46.23		------	------	------	------	------	------	------	------	------	------	------	------	------
TRINITY_DN52816_c1_g1	2446	5.455	3.215	0.215	LOW QUALITY PROTEIN: protein MOR1-like [Durio zibethinus]	GO:0006886;GO:0005622	BP:intracellular protein transport;CC:intracellular;	K16803	CKAP5, XMAP215	------	------	------	------	gi|75251094|sp|Q5N749.1|MOR1_ORYSJ;	RecName: Full=Protein MOR1; AltName: Full=Protein GEM1; AltName: Full=Protein MICROTUBULE ORGANIZATION 1;	------	------	------
TRINITY_DN52845_c5_g1	2017	7.585	2.17	26.835	cationic amino acid transporter 5 isoform X1 [Asparagus officinalis]	GO:0016021;GO:0022857	CC:integral component of membrane;MF:transmembrane transporter activity;	K03294	TC.APA	------	------	COG0531	E:Amino acid transport and metabolism	gi|75278307|sp|O64759.1|CAAT5_ARATH;	RecName: Full=Cationic amino acid transporter 5;	PF13520.3;PF00324.18;PF13906.3	AA_permease_2;AA_permease;AA_permease_C	Amino acid permease;Amino acid permease;C-terminus of AA_permease
TRINITY_DN52852_c5_g1	1205	0.995	0.075	11.385		------	------	------	------	------	------	------	------	------	------	------	------	------
TRINITY_DN52921_c2_g4	892	33.775	12.49	0.17	chloroplast small heat shock protein [Agave americana]	------	------	K13993	HSP20	map04141	Protein processing in endoplasmic reticulum	------	------	gi|232278|sp|P30222.1|HS22C_PETHY;	RecName: Full=Small heat shock protein, chloroplastic; Flags: Precursor;	PF00011.18	HSP20	Hsp20/alpha crystallin family
TRINITY_DN52986_c0_g2	822	4.12	0.56	16.61	CBL-interacting protein kinase 7 [Apostasia shenzhenica]	GO:0007165;GO:0007165;GO:0007165;GO:0005524;GO:0004674;GO:0005524;GO:0004674;GO:0005524;GO:0004674	BP:signal transduction;BP:signal transduction;BP:signal transduction;MF:ATP binding;MF:protein serine/threonine kinase activity;MF:ATP binding;MF:protein serine/threonine kinase activity;MF:ATP binding;MF:protein serine/threonine kinase activity;	------	------	------	------	------	------	gi|75337678|sp|Q9SUL7.1|CIPK4_ARATH;	RecName: Full=CBL-interacting serine/threonine-protein kinase 4; AltName: Full=SNF1-related kinase 3.3; AltName: Full=SOS2-like protein kinase PKS9;	PF00069.22;PF03822.11;PF07714.14;PF14531.3	Pkinase;NAF;Pkinase_Tyr;Kinase-like	Protein kinase domain;NAF domain;Protein tyrosine kinase;Kinase-like
TRINITY_DN52995_c5_g1	1580	2.185	1.335	20.32		------	------	------	------	------	------	------	------	------	------	------	------	------
TRINITY_DN53012_c0_g1	946	3.04	6.78	0.26	uncharacterized protein A4U43_C09F1740 [Asparagus officinalis]	GO:0071949	MF:FAD binding;	------	------	------	------	------	------	------	------	------	------	------
TRINITY_DN53251_c3_g1	1348	5.37	7.175	79.89	PREDICTED: probable isoaspartyl peptidase/L-asparaginase 2 [Juglans regia]	GO:0016787;GO:0016787;GO:0016787;GO:0016787	MF:hydrolase activity;MF:hydrolase activity;MF:hydrolase activity;MF:hydrolase activity;	K13051	iaaA, ASRGL1	------	------	COG1446	E:Amino acid transport and metabolism	gi|85540956|sp|Q8GXG1.2|ASPGB_ARATH;	RecName: Full=Probable isoaspartyl peptidase/L-asparaginase 2; AltName: Full=L-asparagine amidohydrolase 2; Contains: RecName: Full=Isoaspartyl peptidase/L-asparaginase 2 subunit alpha; Contains: RecName: Full=Isoaspartyl peptidase/L-asparaginase 2 subunit beta; Flags: Precursor;	PF01112.15	Asparaginase_2	Asparaginase
TRINITY_DN53280_c0_g1	764	10.465	0.28	17.655	PREDICTED: 7-deoxyloganetin glucosyltransferase-like [Phoenix dactylifera]	GO:0008152;GO:0008152;GO:0008152;GO:0008152;GO:0016758;GO:0016758;GO:0016758;GO:0016758	BP:metabolic process;BP:metabolic process;BP:metabolic process;BP:metabolic process;MF:transferase activity, transferring hexosyl groups;MF:transferase activity, transferring hexosyl groups;MF:transferase activity, transferring hexosyl groups;MF:transferase activity, transferring hexosyl groups;	K21374	UGT85A	------	------	------	------	gi|334351205|sp|Q9LMF1.2|U85A3_ARATH;	RecName: Full=UDP-glycosyltransferase 85A3;	PF00201.15	UDPGT	UDP-glucoronosyl and UDP-glucosyl transferase
TRINITY_DN53298_c4_g1	832	0.04	0	3.995		------	------	------	------	------	------	------	------	------	------	------	------	------
TRINITY_DN53373_c1_g3	554	3.535	1.25	18.2	uncharacterized protein A4U43_C01F27400 [Asparagus officinalis]	------	------	------	------	------	------	COG5269;COG5269	J:Translation, ribosomal structure and biogenesis;O:Posttranslational modification, protein turnover, chaperones	gi|75324337|sp|Q6NNN0.1|RADL3_ARATH;	RecName: Full=Protein RADIALIS-like 3; Short=AtRL3; Short=Protein RAD-like 3;	PF00249.28;PF13921.3	Myb_DNA-binding;Myb_DNA-bind_6	Myb-like DNA-binding domain;Myb-like DNA-binding domain
TRINITY_DN53510_c3_g2	856	3.285	50.885	2.665	hypothetical protein BVRB_7g165350 [Beta vulgaris subsp. vulgaris]	GO:0006952;GO:0042742;GO:0050832;GO:0031640;GO:0006952;GO:0006952;GO:0005576	BP:defense response;BP:defense response to bacterium;BP:defense response to fungus;BP:killing of cells of other organism;BP:defense response;BP:defense response;CC:extracellular region;	------	------	------	------	------	------	gi|3913645|sp|P81456.1|DEF1_VICFA;	RecName: Full=Defensin-like protein 1; AltName: Full=Fabatin-1;	PF00304.17	Gamma-thionin	Gamma-thionin family
TRINITY_DN53534_c1_g4	1344	7.675	2.595	49.065	3-ketoacyl-CoA synthase 11-like isoform X1 [Asparagus officinalis]	GO:0006633;GO:0016021;GO:0016747	BP:fatty acid biosynthetic process;CC:integral component of membrane;MF:transferase activity, transferring acyl groups other than amino-acyl groups;	K15397	KCS	map00062	Fatty acid elongation	------	------	gi|75219503|sp|O48780.1|KCS11_ARATH;	RecName: Full=3-ketoacyl-CoA synthase 11; Short=KCS-11; AltName: Full=Very long-chain fatty acid condensing enzyme 11; Short=VLCFA condensing enzyme 11;	PF08392.9	FAE1_CUT1_RppA	FAE1/Type III polyketide synthase-like protein
TRINITY_DN53551_c1_g1	1634	4.4	1.61	32.245	Amino acid permease 3 [Ananas comosus]	GO:0016021;GO:0016021	CC:integral component of membrane;CC:integral component of membrane;	------	------	------	------	COG0814	E:Amino acid transport and metabolism	gi|75262385|sp|Q9FF99.1|AAP7_ARATH;	RecName: Full=Probable amino acid permease 7; AltName: Full=Amino acid transporter AAP7;	PF01490.15;PF03222.10	Aa_trans;Trp_Tyr_perm	Transmembrane amino acid transporter protein;Tryptophan/tyrosine permease family
TRINITY_DN53855_c0_g2	526	40.405	1.195	33.17	receptor kinase-like protein Xa21 [Asparagus officinalis]	------	------	------	------	------	------	------	------	gi|263419078|sp|C0LGT6.1|EFR_ARATH;	RecName: Full=LRR receptor-like serine/threonine-protein kinase EFR; AltName: Full=Elongation factor Tu receptor; Short=EF-Tu receptor; Flags: Precursor;	PF13855.3;PF12799.4	LRR_8;LRR_4	Leucine rich repeat;Leucine Rich repeats
TRINITY_DN53855_c0_g4	644	48.82	2.9	0	LOW QUALITY PROTEIN: receptor kinase-like protein Xa21 [Asparagus officinalis]	GO:0016021;GO:0016021;GO:0005524;GO:0004674;GO:0005524;GO:0004674	CC:integral component of membrane;CC:integral component of membrane;MF:ATP binding;MF:protein serine/threonine kinase activity;MF:ATP binding;MF:protein serine/threonine kinase activity;	------	------	------	------	------	------	gi|263419078|sp|C0LGT6.1|EFR_ARATH;	RecName: Full=LRR receptor-like serine/threonine-protein kinase EFR; AltName: Full=Elongation factor Tu receptor; Short=EF-Tu receptor; Flags: Precursor;	PF13855.3	LRR_8	Leucine rich repeat
TRINITY_DN53906_c2_g2	851	0.985	18.05	0.69	fasciclin-like arabinogalactan protein 7 [Asparagus officinalis]	------	------	------	------	------	------	------	------	gi|38257788|sp|Q9SJ81.1|FLA7_ARATH;	RecName: Full=Fasciclin-like arabinogalactan protein 7; Flags: Precursor;	PF02469.19	Fasciclin	Fasciclin domain
TRINITY_DN54034_c5_g2	984	2.475	10.405	2.36	hypothetical protein CISIN_1g032153mg [Citrus sinensis]	GO:0016021;GO:0016021	CC:integral component of membrane;CC:integral component of membrane;	K14332	psaO	map00195	Photosynthesis	------	------	gi|75249761|sp|Q949Q5.1|PSAO_ARATH;	RecName: Full=Photosystem I subunit O; Short=PSI-O; Flags: Precursor;	------	------	------
TRINITY_DN54221_c4_g3	1450	4.285	0.095	2.375		------	------	------	------	------	------	------	------	------	------	------	------	------
TRINITY_DN54257_c1_g1	1276	64.255	1.515	56.575	unnamed protein product, partial [Vitis vinifera]	------	------	------	------	------	------	------	------	gi|75273319|sp|Q9LI74.1|CHUP1_ARATH;	RecName: Full=Protein CHUP1, chloroplastic; AltName: Full=Protein CHLOROPLAST UNUSUAL POSITIONING 1;	------	------	------
TRINITY_DN54308_c3_g2	2012	5.94	2.17	23.075	uncharacterized protein A4U43_C07F10940 [Asparagus officinalis]	GO:0015969;GO:0009507;GO:0005509	BP:guanosine tetraphosphate metabolic process;CC:chloroplast;MF:calcium ion binding;	------	------	------	------	COG0317;COG0317	K:Transcription;T:Signal transduction mechanisms	gi|75147788|sp|Q84R11.1|CRSH_ARATH;	RecName: Full=Probable GTP diphosphokinase CRSH, chloroplastic; AltName: Full=Calcium-activated RelA/Spot homolog; Short=AtCRSH; AltName: Full=ppGpp synthetase CRSH; Flags: Precursor;	PF04607.14;PF13328.3;PF13202.3;PF00036.29;PF13405.3;PF13499.3	RelA_SpoT;HD_4;EF-hand_5;EF-hand_1;EF-hand_6;EF-hand_7	Region found in RelA / SpoT proteins;HD domain;EF hand;EF hand;EF-hand domain;EF-hand domain pair
TRINITY_DN54334_c2_g4	401	72.995	0.685	40.35		------	------	------	------	------	------	------	------	------	------	------	------	------
TRINITY_DN54733_c8_g1	1777	0.235	0	1.6	PREDICTED: protein NRT1/ PTR FAMILY 7.3-like isoform X1 [Elaeis guineensis]	GO:0016021;GO:0016021;GO:0022857;GO:0022857	CC:integral component of membrane;CC:integral component of membrane;MF:transmembrane transporter activity;MF:transmembrane transporter activity;	------	------	------	------	------	------	gi|310947340|sp|Q9LQL2.2|PTR14_ARATH;	RecName: Full=Protein NRT1/ PTR FAMILY 7.3; Short=AtNPF7.3; AltName: Full=Nitrate transporter 1.5;	PF00854.18	PTR2	POT family
TRINITY_DN54774_c8_g1	317	31.72	187.205	5.805		------	------	------	------	------	------	------	------	------	------	------	------	------
TRINITY_DN54776_c1_g4	738	0.05	0.355	6.09		------	------	------	------	------	------	------	------	------	------	------	------	------
TRINITY_DN54777_c0_g1	1073	0.92	0.915	9.14	PREDICTED: cationic peroxidase 1-like [Phoenix dactylifera]	GO:0042744;GO:0006979;GO:0042744;GO:0006979;GO:0005576;GO:0005576;GO:0020037;GO:0046872;GO:0004601;GO:0020037;GO:0046872;GO:0004601	BP:hydrogen peroxide catabolic process;BP:response to oxidative stress;BP:hydrogen peroxide catabolic process;BP:response to oxidative stress;CC:extracellular region;CC:extracellular region;MF:heme binding;MF:metal ion binding;MF:peroxidase activity;MF:heme binding;MF:metal ion binding;MF:peroxidase activity;	K00430	E1.11.1.7	map00940	Phenylpropanoid biosynthesis	------	------	gi|6093671|sp|P22195.2|PER1_ARAHY;	RecName: Full=Cationic peroxidase 1; AltName: Full=PNPC1; Flags: Precursor;	PF00141.20	peroxidase	Peroxidase
TRINITY_DN54777_c0_g2	1331	3.875	2.845	29.13	PREDICTED: peroxidase 59-like [Musa acuminata subsp. malaccensis]	GO:0042744;GO:0006979;GO:0042744;GO:0006979;GO:0005576;GO:0005576;GO:0020037;GO:0046872;GO:0004601;GO:0020037;GO:0046872;GO:0004601	BP:hydrogen peroxide catabolic process;BP:response to oxidative stress;BP:hydrogen peroxide catabolic process;BP:response to oxidative stress;CC:extracellular region;CC:extracellular region;MF:heme binding;MF:metal ion binding;MF:peroxidase activity;MF:heme binding;MF:metal ion binding;MF:peroxidase activity;	K00430	E1.11.1.7	map00940	Phenylpropanoid biosynthesis	------	------	gi|26398017|sp|Q42517.1|PERN_ARMRU;	RecName: Full=Peroxidase N; AltName: Full=Neutral peroxidase; Flags: Precursor;	PF00141.20	peroxidase	Peroxidase
TRINITY_DN54895_c8_g2	649	20.335	1.69	137.41		------	------	------	------	------	------	------	------	------	------	------	------	------
TRINITY_DN55034_c5_g1	1138	0	1.47	0		------	------	------	------	------	------	------	------	------	------	------	------	------
TRINITY_DN55096_c0_g2	582	18.18	1.135	21.58	L-type lectin-domain containing receptor kinase IV.2-like [Asparagus officinalis]	GO:0016021;GO:0016021;GO:0005524;GO:0030246;GO:0004672;GO:0005524;GO:0030246;GO:0004672;GO:0030246;GO:0016301	CC:integral component of membrane;CC:integral component of membrane;MF:ATP binding;MF:carbohydrate binding;MF:protein kinase activity;MF:ATP binding;MF:carbohydrate binding;MF:protein kinase activity;MF:carbohydrate binding;MF:kinase activity;	------	------	------	------	------	------	gi|75318718|sp|O80939.1|LRK41_ARATH;	RecName: Full=L-type lectin-domain containing receptor kinase IV.1; Short=Arabidopsis thaliana lectin-receptor kinase e; Short=AthlecRK-e; Short=LecRK-IV.1; AltName: Full=Lectin Receptor Kinase 1; Flags: Precursor;	PF00139.16	Lectin_legB	Legume lectin domain
TRINITY_DN55228_c2_g5	1508	1.075	11.575	0		------	------	------	------	------	------	------	------	------	------	------	------	------
TRINITY_DN55241_c2_g1	1660	1.94	2.48	0.355		------	------	------	------	------	------	------	------	------	------	------	------	------
TRINITY_DN55245_c0_g1	2011	0.235	0.645	5.005	PREDICTED: uncharacterized protein LOC105041137 isoform X1 [Elaeis guineensis]	GO:0016021;GO:0016021;GO:0016021;GO:0016757;GO:0016757;GO:0016757	CC:integral component of membrane;CC:integral component of membrane;CC:integral component of membrane;MF:transferase activity, transferring glycosyl groups;MF:transferase activity, transferring glycosyl groups;MF:transferase activity, transferring glycosyl groups;	------	------	------	------	------	------	gi|82076796|sp|Q5NDE6.1|PMGT2_XENTR;	RecName: Full=Protein O-linked-mannose beta-1,4-N-acetylglucosaminyltransferase 2; Short=POMGnT2; AltName: Full=Extracellular O-linked N-acetylglucosamine transferase-like; AltName: Full=Glycosyltransferase-like domain-containing protein 2;	PF04577.11	DUF563	Protein of unknown function
TRINITY_DN55302_c1_g5	1729	6.27	0.085	2.49	PREDICTED: cytochrome P450 714D1 [Elaeis guineensis]	GO:0016021;GO:0020037;GO:0005506;GO:0004497;GO:0016705	CC:integral component of membrane;MF:heme binding;MF:iron ion binding;MF:monooxygenase activity;MF:oxidoreductase activity, acting on paired donors, with incorporation or reduction of molecular oxygen;	K20666;K20663	CYP714D1;CYP714B	------	------	------	------	gi|510791460|sp|B6SSW8.1|C14B3_MAIZE;	RecName: Full=Cytochrome P450 714B3;	PF00067.19	p450	Cytochrome P450
TRINITY_DN55369_c10_g3	729	0.765	0.41	5.715	uncharacterized protein LOC109833200 isoform X1 [Asparagus officinalis]	------	------	------	------	------	------	------	------	------	------	------	------	------
TRINITY_DN55379_c5_g2	934	11.475	7.63	0.58		------	------	------	------	------	------	------	------	------	------	------	------	------
TRINITY_DN55437_c2_g1	1019	8.885	2.595	50.52	ocs element-binding factor 1 [Zea mays]	GO:0003700;GO:0003700	MF:transcription factor activity, sequence-specific DNA binding;MF:transcription factor activity, sequence-specific DNA binding;	------	------	------	------	------	------	gi|75219969|sp|O65683.1|BZP11_ARATH;	RecName: Full=bZIP transcription factor 11; Short=AtbZIP11; AltName: Full=G-box-binding factor 6; AltName: Full=bZIP transcription factor ATB2;	PF00170.18;PF07716.12	bZIP_1;bZIP_2	bZIP transcription factor;Basic region leucine zipper
TRINITY_DN55510_c1_g2	3871	4.315	3.565	146.78	LOW QUALITY PROTEIN: prolyl endopeptidase-like [Asparagus officinalis]	GO:0004252;GO:0070008;GO:0004252;GO:0070008	MF:serine-type endopeptidase activity;MF:serine-type exopeptidase activity;MF:serine-type endopeptidase activity;MF:serine-type exopeptidase activity;	K01322	PREP	------	------	COG1505	E:Amino acid transport and metabolism	gi|215273868|sp|P48147.2|PPCE_HUMAN;	RecName: Full=Prolyl endopeptidase; Short=PE; AltName: Full=Post-proline cleaving enzyme;	PF02897.12;PF00326.18	Peptidase_S9_N;Peptidase_S9	Prolyl oligopeptidase, N-terminal beta-propeller domain;Prolyl oligopeptidase family
TRINITY_DN55563_c2_g1	975	62.755	18.11	138.1	luminal-binding protein 5-like [Ananas comosus]	GO:0005524;GO:0005524	MF:ATP binding;MF:ATP binding;	K09490	HSPA5, BIP	map03060;map04141	Protein export;Protein processing in endoplasmic reticulum	------	------	gi|729620|sp|Q03684.1|BIP4_TOBAC;	RecName: Full=Luminal-binding protein 4; Short=BiP 4; AltName: Full=78 kDa glucose-regulated protein homolog 4; Short=GRP-78-4; Flags: Precursor [Nicotiana tabacum];	PF10712.6;PF00012.17;PF06723.10;PF01968.15	NAD-GH;HSP70;MreB_Mbl;Hydantoinase_A	NAD-specific glutamate dehydrogenase;Hsp70 protein;MreB/Mbl protein;Hydantoinase/oxoprolinase
TRINITY_DN55607_c3_g1	1656	0.4	0.205	3.465	PREDICTED: mitogen-activated protein kinase kinase kinase 3-like [Elaeis guineensis]	GO:0005524;GO:0004674;GO:0005524;GO:0004674;GO:0005524;GO:0004674	MF:ATP binding;MF:protein serine/threonine kinase activity;MF:ATP binding;MF:protein serine/threonine kinase activity;MF:ATP binding;MF:protein serine/threonine kinase activity;	------	------	------	------	------	------	gi|417775|sp|Q01389.1|BCK1_YEAST;	RecName: Full=Serine/threonine-protein kinase BCK1/SLK1/SSP31;	PF00069.22;PF07714.14	Pkinase;Pkinase_Tyr	Protein kinase domain;Protein tyrosine kinase
TRINITY_DN55706_c1_g3	701	78.475	18.335	0		------	------	------	------	------	------	------	------	------	------	------	------	------
TRINITY_DN55844_c1_g1	1118	36.835	10.785	59.665	hypersensitive-induced response protein 1 [Asparagus officinalis]	------	------	------	------	------	------	COG0330	O:Posttranslational modification, protein turnover, chaperones	gi|75262692|sp|Q9FM19.1|HIR1_ARATH;	RecName: Full=Hypersensitive-induced response protein 1; Short=AtHIR1;	PF01145.22	Band_7	SPFH domain / Band 7 family
TRINITY_DN55844_c1_g4	1222	0.695	0.165	3.975		------	------	------	------	------	------	------	------	------	------	------	------	------
TRINITY_DN55896_c2_g6	1077	0.455	6.155	0.915		------	------	------	------	------	------	------	------	------	------	------	------	------
TRINITY_DN55929_c2_g5	335	114.115	239.295	3203.1	PREDICTED: thiamine thiazole synthase 2, chloroplastic-like [Erythranthe guttata]	GO:0006950;GO:0009228;GO:0052837;GO:0006950;GO:0009228;GO:0052837;GO:0006950;GO:0009228;GO:0052837;GO:0006950;GO:0009228;GO:0052837;GO:0009570;GO:0005829;GO:0009570;GO:0005829;GO:0009570;GO:0005829;GO:0009570;GO:0005829;GO:0046872;GO:0046872;GO:0046872;GO:0046872	BP:response to stress;BP:thiamine biosynthetic process;BP:thiazole biosynthetic process;BP:response to stress;BP:thiamine biosynthetic process;BP:thiazole biosynthetic process;BP:response to stress;BP:thiamine biosynthetic process;BP:thiazole biosynthetic process;BP:response to stress;BP:thiamine biosynthetic process;BP:thiazole biosynthetic process;CC:chloroplast stroma;CC:cytosol;CC:chloroplast…	K03146	THI4, THI1	map00730	Thiamine metabolism	------	------	gi|2501189|sp|Q41738.1|THI41_MAIZE;	RecName: Full=Thiamine thiazole synthase 1, chloroplastic; AltName: Full=Thiazole biosynthetic enzyme 1; Flags: Precursor;	PF01946.14	Thi4	Thi4 family
TRINITY_DN56181_c2_g1	839	7.09	0.35	10.105		------	------	------	------	------	------	------	------	------	------	------	------	------
TRINITY_DN56269_c2_g1	3553	2.945	1.555	15.565	PREDICTED: receptor-like protein kinase HSL1 [Elaeis guineensis]	GO:0016021;GO:0016021;GO:0016021;GO:0005524;GO:0004674;GO:0005524;GO:0004674;GO:0005524;GO:0004674	CC:integral component of membrane;CC:integral component of membrane;CC:integral component of membrane;MF:ATP binding;MF:protein serine/threonine kinase activity;MF:ATP binding;MF:protein serine/threonine kinase activity;MF:ATP binding;MF:protein serine/threonine kinase activity;	------	------	------	------	------	------	gi|75337207|sp|Q9SGP2.1|HSL1_ARATH;	RecName: Full=Receptor-like protein kinase HSL1; AltName: Full=Protein HAESA-LIKE1; Flags: Precursor;	PF00069.22;PF07714.14;PF13855.3;PF12799.4;PF08263.9	Pkinase;Pkinase_Tyr;LRR_8;LRR_4;LRRNT_2	Protein kinase domain;Protein tyrosine kinase;Leucine rich repeat;Leucine Rich repeats;Leucine rich repeat N-terminal domain
TRINITY_DN56301_c5_g1	1874	0.29	5.48	15.69	Dienelactone hydrolase [Parasponia andersonii]	GO:0016787	MF:hydrolase activity;	------	------	------	------	------	------	------	------	------	------	------
TRINITY_DN56311_c2_g1	688	0.115	0.745	9.405	PREDICTED: protein O-linked-mannose beta-1,4-N-acetylglucosaminyltransferase 2-like isoform X1 [Musa acuminata subsp. malaccensis]	GO:0016757;GO:0016757;GO:0016757	MF:transferase activity, transferring glycosyl groups;MF:transferase activity, transferring glycosyl groups;MF:transferase activity, transferring glycosyl groups;	------	------	------	------	------	------	gi|82232390|sp|Q5NDE3.1|PMGT2_TETNG;	RecName: Full=Protein O-linked-mannose beta-1,4-N-acetylglucosaminyltransferase 2; Short=POMGnT2; AltName: Full=Extracellular O-linked N-acetylglucosamine transferase-like; AltName: Full=Glycosyltransferase-like domain-containing protein 2;	PF04577.11	DUF563	Protein of unknown function
TRINITY_DN56344_c0_g1	572	11.75	4.53	48.535	PREDICTED: uncharacterized protein LOC105034737 [Elaeis guineensis]	------	------	------	------	------	------	------	------	------	------	PF04450.9	BSP	Peptidase of plants and bacteria
TRINITY_DN56421_c1_g1	2720	1.52	16.95	1.33	PREDICTED: LOW QUALITY PROTEIN: transketolase, chloroplastic-like [Phoenix dactylifera]	GO:0008152;GO:0004802	BP:metabolic process;MF:transketolase activity;	K00615	E2.2.1.1, tktA, tktB	map00030;map00710	Pentose phosphate pathway;Carbon fixation in photosynthetic organisms	------	------	gi|75247623|sp|Q8RWV0.1|TKTC1_ARATH;	RecName: Full=Transketolase-1, chloroplastic; Short=TK; Flags: Precursor;	PF00456.18;PF02775.18;PF00676.17;PF02779.21;PF02780.17	Transketolase_N;TPP_enzyme_C;E1_dh;Transket_pyr;Transketolase_C	Transketolase, thiamine diphosphate binding domain;Thiamine pyrophosphate enzyme, C-terminal TPP binding domain;Dehydrogenase E1 component;Transketolase, pyrimidine binding domain;Transketolase, C-terminal domain
TRINITY_DN56488_c3_g2	630	2.31	0.7	14.465		------	------	------	------	------	------	------	------	------	------	------	------	------
TRINITY_DN56624_c1_g1	816	0	3.415	0	PREDICTED: non-specific lipid-transfer protein-like protein At2g13820 [Raphanus sativus]	------	------	------	------	------	------	------	------	gi|75216245|sp|Q9ZQI8.1|NLTL2_ARATH;	RecName: Full=Non-specific lipid-transfer protein-like protein At2g13820; Flags: Precursor;	PF14368.3;PF00234.19	LTP_2;Tryp_alpha_amyl	Probable lipid transfer;Protease inhibitor/seed storage/LTP family
TRINITY_DN56687_c13_g1	1558	1.145	2.025	29.595	putative F-box protein At4g22170 [Asparagus officinalis]	------	------	------	------	------	------	------	------	gi|142991284|sp|Q9FLP7.2|FB294_ARATH;	RecName: Full=Putative F-box protein At5g55150;	PF03478.15;PF00646.30	DUF295;F-box	Protein of unknown function;F-box domain
TRINITY_DN56727_c3_g7	468	0.13	0.885	22.145		------	------	------	------	------	------	------	------	------	------	------	------	------
TRINITY_DN56765_c5_g3	1127	10.355	9.52	0.47	protein LIFEGUARD 2 [Brachypodium distachyon]	GO:0016021;GO:0016021;GO:0016021	CC:integral component of membrane;CC:integral component of membrane;CC:integral component of membrane;	K06890	K06890	------	------	COG0670	S:Function unknown	gi|75164899|sp|Q94A20.1|BI1L_ARATH;	RecName: Full=BI1-like protein;	PF01027.17	Bax1-I	Inhibitor of apoptosis-promoting Bax1
TRINITY_DN56933_c1_g1	1110	35.065	0.125	9.305		------	------	------	------	------	------	------	------	------	------	------	------	------
TRINITY_DN57042_c0_g1	882	0.4	15.615	0.505	PREDICTED: uncharacterized protein LOC103989860 [Musa acuminata subsp. malaccensis]	GO:0016021;GO:0016021	CC:integral component of membrane;CC:integral component of membrane;	------	------	------	------	------	------	------	------	PF05553.8	DUF761	Cotton fibre expressed protein
TRINITY_DN57307_c3_g7	1259	1.875	7.725	156.39	cysteine synthase [Phalaenopsis equestris]	GO:0006535;GO:0006535;GO:0006535;GO:0004124;GO:0004124;GO:0004124	BP:cysteine biosynthetic process from serine;BP:cysteine biosynthetic process from serine;BP:cysteine biosynthetic process from serine;MF:cysteine synthase activity;MF:cysteine synthase activity;MF:cysteine synthase activity;	K01738	cysK	map00270;map00920	Cysteine and methionine metabolism;Sulfur metabolism	COG0031	E:Amino acid transport and metabolism	gi|84028195|sp|Q9XEA6.2|CYSK1_ORYSJ;	RecName: Full=Cysteine synthase; Short=CSase; AltName: Full=O-acetylserine;	PF00291.22	PALP	Pyridoxal-phosphate dependent enzyme
TRINITY_DN57313_c3_g1	561	34.555	1.315	38.005	PREDICTED: receptor kinase-like protein Xa21 [Elaeis guineensis]	GO:0016021;GO:0032440;GO:0005524;GO:0004672	CC:integral component of membrane;MF:2-alkenal reductase [NA;MF:ATP binding;MF:protein kinase activity;	------	------	------	------	------	------	gi|263419078|sp|C0LGT6.1|EFR_ARATH;	RecName: Full=LRR receptor-like serine/threonine-protein kinase EFR; AltName: Full=Elongation factor Tu receptor; Short=EF-Tu receptor; Flags: Precursor;	PF13855.3;PF12799.4;PF08263.9	LRR_8;LRR_4;LRRNT_2	Leucine rich repeat;Leucine Rich repeats;Leucine rich repeat N-terminal domain
TRINITY_DN57564_c1_g2	759	56.745	42.16	655.03	Peptide methionine sulfoxide reductase MsrA [Macleaya cordata]	GO:0008113;GO:0008113;GO:0008113;GO:0008113	MF:peptide-methionin;MF:peptide-methionin;MF:peptide-methionin;MF:peptide-methionin;	K07304	msrA	------	------	------	------	gi|1709692|sp|P54153.1|MSRA_SOLLC;	RecName: Full=Peptide methionine sulfoxide reductase; AltName: Full=Fruit-ripening protein E4; AltName: Full=Peptide-methionine;	PF01625.18	PMSR	Peptide methionine sulfoxide reductase
TRINITY_DN57564_c1_g3	978	0.405	0	2.12	PREDICTED: peptide methionine sulfoxide reductase-like [Nicotiana tabacum]	GO:0008113;GO:0008113;GO:0008113	MF:peptide-methionin;MF:peptide-methionin;MF:peptide-methionin;	K07304	msrA	------	------	------	------	gi|1709692|sp|P54153.1|MSRA_SOLLC;	RecName: Full=Peptide methionine sulfoxide reductase; AltName: Full=Fruit-ripening protein E4; AltName: Full=Peptide-methionine;	------	------	------
TRINITY_DN57863_c1_g3	1280	9.8	0.55	4.325	uncharacterized protein LOC109820403 [Asparagus officinalis]	GO:0016021;GO:0016021	CC:integral component of membrane;CC:integral component of membrane;	------	------	------	------	------	------	------	------	PF06749.9	DUF1218	Protein of unknown function
TRINITY_DN57897_c1_g2	1613	3.105	8.765	0.65	PREDICTED: cytokinin dehydrogenase 11-like [Elaeis guineensis]	GO:0009690;GO:0009690;GO:0009690;GO:0005615;GO:0019139;GO:0050660;GO:0016614;GO:0019139;GO:0050660;GO:0016614;GO:0019139;GO:0050660;GO:0016614	BP:cytokinin metabolic process;BP:cytokinin metabolic process;BP:cytokinin metabolic process;CC:extracellular space;MF:cytokinin dehydrogenase activity;MF:flavin adenine dinucleotide binding;MF:oxidoreductase activity, acting on CH-OH group of donors;MF:cytokinin dehydrogenase activity;MF:flavin adenine dinucleotide binding;MF:oxidoreductase activity, acting on CH-OH group of donors;MF:cytokinin …	K00279	CKX	map00908	Zeatin biosynthesis	COG0277	C:Energy production and conversion	gi|75225489|sp|Q6Z955.1|CKX11_ORYSJ;	RecName: Full=Cytokinin dehydrogenase 11; AltName: Full=Cytokinin oxidase 11; Short=OsCKX11; Flags: Precursor;	PF09265.7;PF01565.20	Cytokin-bind;FAD_binding_4	Cytokinin dehydrogenase 1, FAD and cytokinin binding;FAD binding domain
TRINITY_DN57922_c2_g1	1149	9.745	0.425	21.33	PREDICTED: cytochrome P450 704C1 [Elaeis guineensis]	------	------	------	------	------	------	------	------	gi|75319885|sp|Q50EK3.1|C04C1_PINTA;	RecName: Full=Cytochrome P450 704C1; AltName: Full=Cytochrome P450 CYPD [Pinus taeda];	PF00067.19	p450	Cytochrome P450
TRINITY_DN58151_c4_g1	718	0.945	60.17	4.45	non-specific lipid-transfer protein A-like [Asparagus officinalis]	GO:0006869;GO:0008289	BP:lipid transport;MF:lipid binding;	------	------	------	------	------	------	gi|3287877|sp|P81402.1|NLTP1_PRUPE;	RecName: Full=Non-specific lipid-transfer protein 1; Short=LTP 1; AltName: Full=Allergen Pru p 1; AltName: Full=Major allergen Pru p 3; AltName: Allergen=Pru p 3;	PF00234.19;PF14368.3	Tryp_alpha_amyl;LTP_2	Protease inhibitor/seed storage/LTP family;Probable lipid transfer
TRINITY_DN58219_c3_g1	508	229.655	5.805	39.77		------	------	------	------	------	------	------	------	------	------	------	------	------
TRINITY_DN58280_c1_g2	1668	2.55	10.975	1.285	PREDICTED: UDP-glycosyltransferase 90A1-like [Phoenix dactylifera]	GO:0008152;GO:0008152;GO:0016758;GO:0016758	BP:metabolic process;BP:metabolic process;MF:transferase activity, transferring hexosyl groups;MF:transferase activity, transferring hexosyl groups;	------	------	------	------	------	------	gi|75217060|sp|Q9ZVX4.1|U90A1_ARATH;	RecName: Full=UDP-glycosyltransferase 90A1;	PF00201.15	UDPGT	UDP-glucoronosyl and UDP-glucosyl transferase
TRINITY_DN58296_c0_g2	3367	0.085	0.18	2.185	probable sucrose-phosphate synthase 4 isoform X1 [Asparagus officinalis]	GO:0005985;GO:0005985;GO:0005985;GO:0005886;GO:0046524;GO:0046524;GO:0016157;GO:0046524	BP:sucrose metabolic process;BP:sucrose metabolic process;BP:sucrose metabolic process;CC:plasma membrane;MF:sucrose-phosphate synthase activity;MF:sucrose-phosphate synthase activity;MF:sucrose synthase activity;MF:sucrose-phosphate synthase activity;	K00696	E2.4.1.14	map00500	Starch and sucrose metabolism	------	------	gi|353678117|sp|F4JLK2.1|SPSA4_ARATH;	RecName: Full=Probable sucrose-phosphate synthase 4; AltName: Full=Sucrose phosphate synthase 4F; Short=AtSPS4F; AltName: Full=UDP-glucose-fructose-phosphate glucosyltransferase;	PF00534.17;PF05116.10;PF13692.3;PF00862.16;PF13579.3;PF13439.3	Glycos_transf_1;S6PP;Glyco_trans_1_4;Sucrose_synth;Glyco_trans_4_4;Glyco_transf_4	Glycosyl transferases group 1;Sucrose-6F-phosphate phosphohydrolase;Glycosyl transferases group 1;Sucrose synthase;Glycosyl transferase 4-like domain;Glycosyltransferase Family 4
TRINITY_DN58439_c2_g3	1882	0.065	0.06	1.485	protein NRT1/ PTR FAMILY 8.1-like [Asparagus officinalis]	GO:0006857;GO:0016021;GO:0022857	BP:oligopeptide transport;CC:integral component of membrane;MF:transmembrane transporter activity;	K14638	SLC15A3_4, PHT	------	------	COG3104	E:Amino acid transport and metabolism	gi|75311821|sp|Q9M390.1|PTR1_ARATH;	RecName: Full=Protein NRT1/ PTR FAMILY 8.1; Short=AtNPF8.1; AltName: Full=Peptide transporter PTR1;	PF00854.18;PF07690.13	PTR2;MFS_1	POT family;Major Facilitator Superfamily
TRINITY_DN58483_c5_g2	1869	5.96	0.39	4.365	PREDICTED: WAT1-related protein At3g30340-like [Elaeis guineensis]	GO:0016021;GO:0016021;GO:0022857;GO:0022857	CC:integral component of membrane;CC:integral component of membrane;MF:transmembrane transporter activity;MF:transmembrane transporter activity;	------	------	------	------	------	------	gi|75273312|sp|Q9LI65.1|WTR24_ARATH;	RecName: Full=WAT1-related protein At3g30340;	PF00892.17	EamA	EamA-like transporter family
TRINITY_DN58485_c0_g2	1270	1.785	0.805	6.68	PREDICTED: LOW QUALITY PROTEIN: probable pectinesterase/pectinesterase inhibitor 41 [Phoenix dactylifera]	GO:0042545;GO:0045490;GO:0042545;GO:0045490;GO:0042545;GO:0005618;GO:0005618;GO:0005618;GO:0045330;GO:0004857;GO:0030599;GO:0045330;GO:0004857;GO:0030599;GO:0045330;GO:0004857;GO:0030599	BP:cell wall modification;BP:pectin catabolic process;BP:cell wall modification;BP:pectin catabolic process;BP:cell wall modification;CC:cell wall;CC:cell wall;CC:cell wall;MF:aspartyl esterase activity;MF:enzyme inhibitor activity;MF:pectinesterase activity;MF:aspartyl esterase activity;MF:enzyme inhibitor activity;MF:pectinesterase activity;MF:aspartyl esterase activity;MF:enzyme inhibitor acti…	K01051	E3.1.1.11	map00040	Pentose and glucuronate interconversions	------	------	gi|229891482|sp|Q8RXK7.2|PME41_ARATH;	RecName: Full=Probable pectinesterase/pectinesterase inhibitor 41; Includes: RecName: Full=Pectinesterase inhibitor 41; AltName: Full=Pectin methylesterase inhibitor 41; Includes: RecName: Full=Pectinesterase 41; Short=PE 41; AltName: Full=AtPMEpcrB; AltName: Full=Pectin methylesterase 41; Short=AtPME41; Flags: Precursor;	PF01095.16;PF04043.12	Pectinesterase;PMEI	Pectinesterase;Plant invertase/pectin methylesterase inhibitor
TRINITY_DN58495_c1_g2	1562	2.075	0.06	2.43	uncharacterized protein LOC111894346 [Lactuca sativa]	GO:0016579;GO:0016579;GO:0003676;GO:0036459;GO:0003676;GO:0036459	BP:protein deubiquitination;BP:protein deubiquitination;MF:nucleic acid binding;MF:thiol-dependent ubiquitinyl hydrolase activity;MF:nucleic acid binding;MF:thiol-dependent ubiquitinyl hydrolase activity;	------	------	------	------	------	------	------	------	PF04780.9	DUF629	Protein of unknown function
TRINITY_DN58563_c2_g3	573	5.03	0.84	16.77		------	------	------	------	------	------	------	------	------	------	------	------	------
TRINITY_DN58725_c5_g3	790	7.465	2.62	33.475	probable LRR receptor-like serine/threonine-protein kinase At1g06840 [Carica papaya]	GO:0016021;GO:0005524;GO:0016491;GO:0004672	CC:integral component of membrane;MF:ATP binding;MF:oxidoreductase activity;MF:protein kinase activity;	------	------	------	------	------	------	gi|264664524|sp|C0LGD7.2|Y1684_ARATH;	RecName: Full=Probable LRR receptor-like serine/threonine-protein kinase At1g06840; Flags: Precursor;	PF00069.22;PF07714.14	Pkinase;Pkinase_Tyr	Protein kinase domain;Protein tyrosine kinase
TRINITY_DN58928_c7_g1	1672	2.705	2.63	0.015	PREDICTED: uncharacterized protein LOC105958311 [Erythranthe guttata]	------	------	------	------	------	------	------	------	------	------	PF10461.6	Peptidase_S68	Peptidase S68
TRINITY_DN58931_c2_g2	1189	33.29	229.515	19.015	PREDICTED: GDSL esterase/lipase At3g26430-like [Phoenix dactylifera]	GO:0008152;GO:0016788;GO:0004560;GO:0016788	BP:metabolic process;MF:hydrolase activity, acting on ester bonds;MF:alpha-L-fucosidase activity;MF:hydrolase activity, acting on ester bonds;	------	------	------	------	------	------	gi|75273423|sp|Q9LIN2.1|GDL53_ARATH;	RecName: Full=GDSL esterase/lipase At3g26430; AltName: Full=Extracellular lipase At3g26430; Flags: Precursor;	PF00657.19	Lipase_GDSL	GDSL-like Lipase/Acylhydrolase
TRINITY_DN59077_c2_g2	1796	15.42	2.36	18.94	sugar transporter ERD6-like 5 [Asparagus officinalis]	GO:0008643;GO:0016021;GO:0016021;GO:0022857;GO:0022857	BP:carbohydrate transport;CC:integral component of membrane;CC:integral component of membrane;MF:transmembrane transporter activity;MF:transmembrane transporter activity;	K08145	SLC2A8, GLUT8	------	------	------	------	gi|117940159|sp|P93051.2|ERDL7_ARATH;	RecName: Full=Sugar transporter ERD6-like 7;	PF00083.21;PF07690.13;PF13347.3	Sugar_tr;MFS_1;MFS_2	Sugar;Major Facilitator Superfamily;MFS/sugar transport protein
TRINITY_DN59080_c3_g2	1025	35.795	13.46	145.365	PREDICTED: polyol transporter 5-like [Musa acuminata subsp. malaccensis]	GO:0016021;GO:0016021;GO:0016021;GO:0022857;GO:0022857;GO:0022857	CC:integral component of membrane;CC:integral component of membrane;CC:integral component of membrane;MF:transmembrane transporter activity;MF:transmembrane transporter activity;MF:transmembrane transporter activity;	------	------	------	------	------	------	gi|118573108|sp|Q8VZ80.2|PLT5_ARATH;	RecName: Full=Polyol transporter 5; AltName: Full=Protein POLYOL TRANSPORTER 5; Short=AtPLT5; AltName: Full=Sugar-proton symporter PLT5;	PF00083.21;PF07690.13	Sugar_tr;MFS_1	Sugar;Major Facilitator Superfamily
TRINITY_DN59087_c3_g2	1880	6.125	4.57	0.55		------	------	------	------	------	------	------	------	------	------	------	------	------
TRINITY_DN59232_c2_g1	1208	4.68	2.935	0.145	PREDICTED: uncharacterized protein LOC105037740 [Elaeis guineensis]	------	------	------	------	------	------	------	------	------	------	------	------	------
TRINITY_DN59248_c4_g1	3290	1.885	0.455	9.295	uncharacterized protein LOC109840218 isoform X1 [Asparagus officinalis]	------	------	------	------	------	------	------	------	------	------	------	------	------
TRINITY_DN59313_c2_g2	1285	0.235	0.375	6.03	GDSL esterase/lipase At2g23540-like [Asparagus officinalis]	GO:0016788	MF:hydrolase activity, acting on ester bonds;	------	------	------	------	------	------	gi|75099763|sp|O80470.1|GDL38_ARATH;	RecName: Full=GDSL esterase/lipase At2g23540; AltName: Full=Extracellular lipase At2g23540; Flags: Precursor;	PF00657.19	Lipase_GDSL	GDSL-like Lipase/Acylhydrolase
TRINITY_DN59393_c3_g2	879	28.96	7.61	0.14		------	------	------	------	------	------	------	------	------	------	------	------	------
TRINITY_DN59393_c3_g3	1035	29.155	8.675	0.055		------	------	------	------	------	------	------	------	------	------	------	------	------
TRINITY_DN59420_c0_g1	1070	1.055	0.225	40.355	PREDICTED: alkane hydroxylase MAH1-like [Nelumbo nucifera]	GO:0020037;GO:0005506;GO:0004497;GO:0016705;GO:0020037;GO:0005506;GO:0004497;GO:0016705	MF:heme binding;MF:iron ion binding;MF:monooxygenase activity;MF:oxidoreductase activity, acting on paired donors, with incorporation or reduction of molecular oxygen;MF:heme binding;MF:iron ion binding;MF:monooxygenase activity;MF:oxidoreductase activity, acting on paired donors, with incorporation or reduction of molecular oxygen;	------	------	------	------	------	------	gi|75309839|sp|Q9FVS9.1|C96AF_ARATH;	RecName: Full=Alkane hydroxylase MAH1; AltName: Full=Cytochrome P450 96A15; AltName: Full=Protein MID-CHAIN ALKANE HYDROXYLASE 1;	PF00067.19	p450	Cytochrome P450
TRINITY_DN59428_c1_g1	1039	2.535	0.56	6.015	PREDICTED: uncharacterized protein LOC105043324 [Elaeis guineensis]	------	------	------	------	------	------	------	------	------	------	------	------	------
TRINITY_DN59451_c0_g1	1450	61.835	16.78	77.83	O-methyltransferase [Iris x hollandica]	GO:0008171;GO:0046983;GO:0008171;GO:0046983;GO:0008171;GO:0046983;GO:0008171;GO:0046983	MF:O-methyltransferase activity;MF:protein dimerization activity;MF:O-methyltransferase activity;MF:protein dimerization activity;MF:O-methyltransferase activity;MF:protein dimerization activity;MF:O-methyltransferase activity;MF:protein dimerization activity;	K16040	ROMT	map00945	Stilbenoid, diarylheptanoid and gingerol biosynthesis	------	------	gi|403399690|sp|B6VJS4.2|ROMT_VITVI;	RecName: Full=Trans-resveratrol di-O-methyltransferase; AltName: Full=Resveratrol O-methyltransferase; Short=ROMT; Short=VvROMT;	PF00891.15;PF08100.8	Methyltransf_2;Dimerisation	O-methyltransferase;Dimerisation domain
TRINITY_DN59454_c6_g1	1189	7.87	5.365	0		------	------	------	------	------	------	------	------	------	------	------	------	------
TRINITY_DN59553_c3_g2	697	25.37	96.9	5824.26		------	------	------	------	------	------	------	------	------	------	------	------	------
TRINITY_DN59615_c2_g4	1543	2.015	0.705	11.51	protein OSB2, chloroplastic-like [Asparagus officinalis]	GO:0003697;GO:0003697	MF:single-stranded DNA binding;MF:single-stranded DNA binding;	------	------	------	------	------	------	gi|75337810|sp|Q9SX99.1|OSB1_ARATH;	RecName: Full=Protein OSB1, mitochondrial; AltName: Full=Organellar single-stranded DNA-binding protein 1; Flags: Precursor;	PF00436.22	SSB	Single-strand binding protein family
TRINITY_DN59693_c2_g6	1040	9.41	31.305	4.895	PREDICTED: 2,3-bisphosphoglycerate-independent phosphoglycerate mutase [Gossypium hirsutum]	GO:0006007;GO:0006007;GO:0006007;GO:0006007;GO:0005737;GO:0005737;GO:0005737;GO:0005737;GO:0030145;GO:0004619;GO:0030145;GO:0004619;GO:0030145;GO:0004619;GO:0030145;GO:0004619	BP:glucose catabolic process;BP:glucose catabolic process;BP:glucose catabolic process;BP:glucose catabolic process;CC:cytoplasm;CC:cytoplasm;CC:cytoplasm;CC:cytoplasm;MF:manganese ion binding;MF:phosphoglycerate mutase activity;MF:manganese ion binding;MF:phosphoglycerate mutase activity;MF:manganese ion binding;MF:phosphoglycerate mutase activity;MF:manganese ion binding;MF:phosphoglycerate mut…	K15633	gpmI	map00010;map00260	Glycolysis / Gluconeogenesis;Glycine, serine and threonine metabolism	------	------	gi|3914394|sp|Q42908.1|PMGI_MESCR;	RecName: Full=2,3-bisphosphoglycerate-independent phosphoglycerate mutase; Short=BPG-independent PGAM; Short=Phosphoglyceromutase; AltName: Full=PGAM-I;	PF01676.15	Metalloenzyme	Metalloenzyme superfamily
TRINITY_DN59786_c1_g1	476	2.635	38.655	0.765		------	------	------	------	------	------	------	------	------	------	------	------	------
TRINITY_DN59817_c5_g3	1183	0.285	0.11	3.11	exocyst subunit exo70 family protein G1 [Zostera marina]	GO:0006887;GO:0006887;GO:0006887;GO:0006887;GO:0006887;GO:0000145;GO:0000145;GO:0000145;GO:0000145;GO:0005829;GO:0000145	BP:exocytosis;BP:exocytosis;BP:exocytosis;BP:exocytosis;BP:exocytosis;CC:exocyst;CC:exocyst;CC:exocyst;CC:exocyst;CC:cytosol;CC:exocyst;	K07195	EXOC7, EXO70	------	------	------	------	------	------	------	------	------
TRINITY_DN59917_c4_g1	3933	0.135	0.145	1.465		------	------	------	------	------	------	------	------	------	------	------	------	------
TRINITY_DN59918_c8_g2	3008	0.75	0.005	0.95		------	------	------	------	------	------	------	------	------	------	------	------	------
TRINITY_DN59991_c3_g3	730	7.315	4.825	25.13	PREDICTED: histone H1-like [Elaeis guineensis]	GO:0006334;GO:0006334;GO:0006334;GO:0000786;GO:0005634;GO:0000786;GO:0005634;GO:0000786;GO:0005634;GO:0003677;GO:0003677;GO:0003677	BP:nucleosome assembly;BP:nucleosome assembly;BP:nucleosome assembly;CC:nucleosome;CC:nucleus;CC:nucleosome;CC:nucleus;CC:nucleosome;CC:nucleus;MF:DNA binding;MF:DNA binding;MF:DNA binding;	K11275	H1_5	------	------	------	------	gi|121950|sp|P23444.2|H1_MAIZE;	RecName: Full=Histone H1;	PF00538.16	Linker_histone	linker histone H1 and H5 family
TRINITY_DN60198_c0_g1	1496	0.105	0.555	10.65	PREDICTED: WAT1-related protein At5g07050-like [Phoenix dactylifera]	GO:0016021;GO:0016021;GO:0022857;GO:0022857	CC:integral component of membrane;CC:integral component of membrane;MF:transmembrane transporter activity;MF:transmembrane transporter activity;	------	------	------	------	------	------	gi|75171397|sp|Q9FL41.1|WTR38_ARATH;	RecName: Full=WAT1-related protein At5g07050;	PF00892.17	EamA	EamA-like transporter family
TRINITY_DN60247_c0_g2	2187	0.07	2.175	0.275	PREDICTED: primary amine oxidase [Elaeis guineensis]	GO:0009308;GO:0005507;GO:0008131;GO:0048038	BP:amine metabolic process;MF:copper ion binding;MF:primary amine oxidase activity;MF:quinone binding;	K00276	AOC3, AOC2, tynA	map00260;map00960;map00950;map00360;map00350;map00410	Glycine, serine and threonine metabolism;Tropane, piperidine and pyridine alkaloid biosynthesis;Isoquinoline alkaloid biosynthesis;Phenylalanine metabolism;Tyrosine metabolism;beta-Alanine metabolism	------	------	gi|2501337|sp|Q43077.1|AMO_PEA;	RecName: Full=Primary amine oxidase; AltName: Full=Amine oxidase [copper-containing]; Flags: Precursor;	PF01179.17;PF02728.13;PF02727.13	Cu_amine_oxid;Cu_amine_oxidN3;Cu_amine_oxidN2	Copper amine oxidase, enzyme domain;Copper amine oxidase, N3 domain;Copper amine oxidase, N2 domain
TRINITY_DN60278_c4_g1	1933	0.2	0.05	1.91	PREDICTED: U-box domain-containing protein 33-like isoform X1 [Elaeis guineensis]	------	------	------	------	------	------	------	------	gi|172045745|sp|Q8GUH1.2|PUB33_ARATH;	RecName: Full=U-box domain-containing protein 33; AltName: Full=Plant U-box protein 33; Includes: RecName: Full=E3 ubiquitin ligase; Includes: RecName: Full=Serine/threonine-protein kinase;	PF00069.22;PF07714.14	Pkinase;Pkinase_Tyr	Protein kinase domain;Protein tyrosine kinase
TRINITY_DN60404_c1_g2	2870	10.67	8.655	2.24	PREDICTED: J domain-containing protein required for chloroplast accumulation response 1 isoform X1 [Elaeis guineensis]	------	------	------	------	------	------	------	------	gi|75333582|sp|Q9C9Q4.1|JAC1_ARATH;	RecName: Full=J domain-containing protein required for chloroplast accumulation response 1;	PF00226.28	DnaJ	DnaJ domain
TRINITY_DN60648_c1_g1	976	1.675	0.405	8.56		------	------	------	------	------	------	------	------	------	------	------	------	------
TRINITY_DN60711_c1_g2	1611	193.095	18.54	214.68	aspartyl protease family protein At5g10770-like [Ananas comosus]	GO:0004190	MF:aspartic-type endopeptidase activity;	------	------	------	------	------	------	gi|75160614|sp|Q8S9J6.1|ASPA_ARATH;	RecName: Full=Aspartyl protease family protein At5g10770; Flags: Precursor;	PF14543.3;PF00026.20;PF14541.3	TAXi_N;Asp;TAXi_C	Xylanase inhibitor N-terminal;Eukaryotic aspartyl protease;Xylanase inhibitor C-terminal
TRINITY_DN60721_c2_g4	825	3.105	0.48	27.235	PREDICTED: BURP domain-containing protein 3 [Phoenix dactylifera]	------	------	------	------	------	------	------	------	gi|75164073|sp|Q942D4.1|BURP3_ORYSJ;	RecName: Full=BURP domain-containing protein 3; Short=OsBURP03; Flags: Precursor;	PF03181.12	BURP	BURP domain
TRINITY_DN60760_c3_g1	825	2.13	0.615	8.32	PREDICTED: uncharacterized protein LOC105044326 isoform X2 [Elaeis guineensis]	------	------	K03834	tyrP	------	------	------	------	gi|77416685|sp|P0AAD4.1|TYRP_ECOLI;	RecName: Full=Tyrosine-specific transport protein; AltName: Full=Tyrosine permease >gi|77416686|sp|P0AAD5.1|TYRP_SHIFL RecName: Full=Tyrosine-specific transport protein; AltName: Full=Tyrosine permease;	PF03222.10;PF01490.15	Trp_Tyr_perm;Aa_trans	Tryptophan/tyrosine permease family;Transmembrane amino acid transporter protein
TRINITY_DN60855_c2_g1	1234	1.91	2.055	0.045		------	------	------	------	------	------	------	------	------	------	------	------	------
TRINITY_DN60865_c6_g2	237	189.9	140.15	0	stromal 70 kDa heat shock-related protein, chloroplastic-like [Asparagus officinalis]	GO:0006457;GO:0006457;GO:0006457;GO:0006457;GO:0005524;GO:0051082;GO:0005524;GO:0051082;GO:0005524;GO:0051082;GO:0005524;GO:0051082	BP:protein folding;BP:protein folding;BP:protein folding;BP:protein folding;MF:ATP binding;MF:unfolded protein binding;MF:ATP binding;MF:unfolded protein binding;MF:ATP binding;MF:unfolded protein binding;MF:ATP binding;MF:unfolded protein binding;	K03283	HSPA1_8	map04144;map04141;map03040	Endocytosis;Protein processing in endoplasmic reticulum;Spliceosome	------	------	gi|399942|sp|Q02028.1|HSP7S_PEA;	RecName: Full=Stromal 70 kDa heat shock-related protein, chloroplastic; Flags: Precursor;	------	------	------
TRINITY_DN60867_c1_g1	1982	1.355	1.935	0.23		------	------	------	------	------	------	------	------	------	------	------	------	------
TRINITY_DN60935_c1_g1	1361	65.96	20.49	454.405	Dehydrodolichyl diphosphate synthase 2 [Apostasia shenzhenica]	GO:0016765;GO:0016765	MF:transferase activity, transferring alkyl or ary;MF:transferase activity, transferring alkyl or ary;	K11778	DHDDS, RER2, SRT1	map00900	Terpenoid backbone biosynthesis	COG0020	I:Lipid transport and metabolism	gi|85541788|sp|Q56Y11.2|DDPS2_ARATH;	RecName: Full=Dehydrodolichyl diphosphate synthase 2; Short=Dedol-PP synthase 2;	PF01255.16	Prenyltransf	Putative undecaprenyl diphosphate synthase
TRINITY_DN60991_c2_g8	710	1.9	7.155	0.195	uncharacterized protein LOC109840611 [Asparagus officinalis]	------	------	------	------	------	------	------	------	------	------	------	------	------
TRINITY_DN61049_c3_g6	1021	3.73	13.935	0.955	myb-related protein Zm1-like [Asparagus officinalis]	------	------	K09422	MYBP	------	------	------	------	gi|127580|sp|P20024.1|MYB1_MAIZE;	RecName: Full=Myb-related protein Zm1;	PF00249.28;PF13921.3	Myb_DNA-binding;Myb_DNA-bind_6	Myb-like DNA-binding domain;Myb-like DNA-binding domain
TRINITY_DN61064_c4_g3	729	13.255	42.825	0.095	PREDICTED: uncharacterized protein LOC103717683 [Phoenix dactylifera]	------	------	------	------	------	------	------	------	------	------	------	------	------
TRINITY_DN61165_c1_g4	1181	2.67	0.645	5.72	PREDICTED: caffeoyl-CoA O-methyltransferase-like isoform X1 [Elaeis guineensis]	------	------	K00588;K13272	E2.1.1.104;AOMT, CROMT2	map00940;map00941;map00360;map00945;map00944	Phenylpropanoid biosynthesis;Flavonoid biosynthesis;Phenylalanine metabolism;Stilbenoid, diarylheptanoid and gingerol biosynthesis;Flavone and flavonol biosynthesis	------	------	gi|510791478|sp|C7AE94.1|FAOMT_VITVI;	RecName: Full=Flavonoid 3',5'-methyltransferase; AltName: Full=Anthocyanin-O-methyltransferase; Short=VvAOMT;	PF01596.14;PF13578.3	Methyltransf_3;Methyltransf_24	O-methyltransferase;Methyltransferase domain
TRINITY_DN61303_c2_g1	1776	0.22	159.185	0.6	PREDICTED: vicilin-like antimicrobial peptides 2-3 [Nicotiana attenuata]	GO:0045735;GO:0045735;GO:0045735	MF:nutrient reservoir activity;MF:nutrient reservoir activity;MF:nutrient reservoir activity;	------	------	------	------	------	------	gi|75266171|sp|Q9SPL4.1|AMP22_MACIN;	RecName: Full=Vicilin-like antimicrobial peptides 2-2; AltName: Full=MiAMP2; Contains: RecName: Full=Antimicrobial peptide 2a; AltName: Full=MiAMP2a; Contains: RecName: Full=Antimicrobial peptide 2b; AltName: Full=MiAMP2b; Contains: RecName: Full=Antimicrobial peptide 2c-1; AltName: Full=MiAMP2c-1; Contains: RecName: Full=Antimicrobial peptide 2c-2; AltName: Full=MiAMP2c-2; Contains: RecName: Ful…	PF00190.19;PF07883.8	Cupin_1;Cupin_2	Cupin;Cupin domain
TRINITY_DN61586_c2_g2	762	0.47	1.635	42.375		------	------	------	------	------	------	------	------	------	------	------	------	------
TRINITY_DN61647_c0_g4	779	4136.97	261.59	3211.32	PREDICTED: pathogenesis-related protein 1-like [Elaeis guineensis]	GO:0006952;GO:0009607;GO:0006952;GO:0009607;GO:0006952;GO:0009607	BP:defense response;BP:response to biotic stimulus;BP:defense response;BP:response to biotic stimulus;BP:defense response;BP:response to biotic stimulus;	------	------	------	------	------	------	gi|548591|sp|Q05736.1|PR1_ASPOF;	RecName: Full=Pathogenesis-related protein 1; Short=AOPR1;	PF00407.16	Bet_v_1	Pathogenesis-related protein Bet v I family
TRINITY_DN61680_c5_g1	1112	4.855	22.66	3.02		------	------	------	------	------	------	------	------	------	------	------	------	------
TRINITY_DN61706_c4_g1	2240	8.825	2.82	23.64	cycloartenol synthase 2-like [Asparagus officinalis]	GO:0016866;GO:0016866;GO:0016866	MF:intramolecular transferase activity;MF:intramolecular transferase activity;MF:intramolecular transferase activity;	K01853	CAS1	map00100	Steroid biosynthesis	COG1657	I:Lipid transport and metabolism	gi|75248720|sp|Q8W3Z3.1|CAS2_BETPL;	RecName: Full=Cycloartenol synthase 2;	PF13243.3;PF13249.3;PF00432.18	SQHop_cyclase_C;SQHop_cyclase_N;Prenyltrans	Squalene-hopene cyclase C-terminal domain;Squalene-hopene cyclase N-terminal domain;Prenyltransferase and squalene oxidase repeat
TRINITY_DN61927_c7_g1	2150	2.31	1.8	12.005		------	------	------	------	------	------	------	------	------	------	------	------	------
TRINITY_DN61996_c0_g2	1142	64.23	13.81	2.125	rust resistance kinase Lr10-like [Ananas comosus]	------	------	------	------	------	------	------	------	gi|75319119|sp|P93604.1|LRK10_WHEAT;	RecName: Full=Rust resistance kinase Lr10; AltName: Full=Probable receptor-like serine/threonine-protein kinase LRK10; Flags: Precursor;	PF00069.22;PF07714.14	Pkinase;Pkinase_Tyr	Protein kinase domain;Protein tyrosine kinase
TRINITY_DN62040_c5_g1	1005	0.24	0.03	2.81		------	------	------	------	------	------	------	------	------	------	------	------	------
TRINITY_DN62045_c7_g7	970	2.785	0.56	8.235	uncharacterized protein A4U43_C03F18380 [Asparagus officinalis]	GO:0008152;GO:0008152;GO:0008152;GO:0008152;GO:0016758;GO:0016758;GO:0016758;GO:0016758	BP:metabolic process;BP:metabolic process;BP:metabolic process;BP:metabolic process;MF:transferase activity, transferring hexosyl groups;MF:transferase activity, transferring hexosyl groups;MF:transferase activity, transferring hexosyl groups;MF:transferase activity, transferring hexosyl groups;	K21374	UGT85A	------	------	------	------	gi|678019172|sp|F8WKW1.1|UGT2_GARJA;	RecName: Full=7-deoxyloganetin glucosyltransferase; AltName: Full=Genipin glucosyltransferase; AltName: Full=UDP-glucose glucosyltransferase 2; Short=GjUGT2; AltName: Full=UDP-glycosyltransferase 85A24;	PF00201.15	UDPGT	UDP-glucoronosyl and UDP-glucosyl transferase
TRINITY_DN62143_c1_g1	4166	15.065	6.55	0.655	uncharacterized protein A4U43_C07F19640 [Asparagus officinalis]	GO:0016021;GO:0005524;GO:0004672	CC:integral component of membrane;MF:ATP binding;MF:protein kinase activity;	------	------	------	------	------	------	gi|75175345|sp|Q9LP24.1|Y1571_ARATH;	RecName: Full=Probable leucine-rich repeat receptor-like protein kinase At1g35710; Flags: Precursor;	PF13855.3;PF12799.4;PF00069.22;PF07714.14;PF08263.9	LRR_8;LRR_4;Pkinase;Pkinase_Tyr;LRRNT_2	Leucine rich repeat;Leucine Rich repeats;Protein kinase domain;Protein tyrosine kinase;Leucine rich repeat N-terminal domain
TRINITY_DN62284_c5_g2	2392	3.475	1.05	7.705	type I inositol polyphosphate 5-phosphatase 2 isoform X1 [Asparagus officinalis]	GO:0046856;GO:0046856;GO:0046856;GO:0016787;GO:0016787;GO:0016787	BP:phosphatidylinositol dephosphorylation;BP:phosphatidylinositol dephosphorylation;BP:phosphatidylinositol dephosphorylation;MF:hydrolase activity;MF:hydrolase activity;MF:hydrolase activity;	------	------	------	------	------	------	gi|67461078|sp|Q9FUR2.2|IP5P2_ARATH;	RecName: Full=Type I inositol polyphosphate 5-phosphatase 2; Short=At5PTase2;	PF03372.20	Exo_endo_phos	Endonuclease/Exonuclease/phosphatase family
TRINITY_DN62291_c5_g4	991	2.8	0	2.225		------	------	------	------	------	------	------	------	------	------	------	------	------
TRINITY_DN62297_c1_g1	706	252.98	1	25.885	probable linoleate 9S-lipoxygenase 5 [Asparagus officinalis]	------	------	K15718	LOX1_5	map00591	Linoleic acid metabolism	------	------	gi|75282482|sp|Q43191.1|LOX15_SOLTU;	RecName: Full=Probable linoleate 9S-lipoxygenase 5; AltName: Full=Leaf lipoxygenase;	------	------	------
TRINITY_DN62372_c4_g3	527	54.375	32.425	205.185	PREDICTED: auxin-responsive protein SAUR32-like [Phoenix dactylifera]	GO:0009733;GO:0009733	BP:response to auxin;BP:response to auxin;	K14488	SAUR	map04075	Plant hormone signal transduction	------	------	gi|75216875|sp|Q9ZUZ3.1|SAU32_ARATH;	RecName: Full=Auxin-responsive protein SAUR32; AltName: Full=Protein ABOLISHED APICAL HOOK MAINTENANCE 1; AltName: Full=Protein SMALL AUXIN UP RNA 32;	PF02519.11	Auxin_inducible	Auxin responsive protein
TRINITY_DN62410_c3_g4	1214	0	0	1.88	uncharacterized protein LOC109828430 isoform X2 [Asparagus officinalis]	------	------	K05349	bglX	map00460;map00940;map00500	Cyanoamino acid metabolism;Phenylpropanoid biosynthesis;Starch and sucrose metabolism	------	------	gi|60390960|sp|Q9FIY7.1|SM3L3_ARATH;	RecName: Full=Putative SWI/SNF-related matrix-associated actin-dependent regulator of chromatin subfamily A member 3-like 3; Short=SMARCA3-like protein 3;	------	------	------
TRINITY_DN62420_c1_g1	3368	0.74	0.5	3.735	uncharacterized protein LOC109827551 [Asparagus officinalis]	------	------	------	------	------	------	------	------	gi|74705367|sp|O00370.1|LORF2_HUMAN;	RecName: Full=LINE-1 retrotransposable element ORF2 protein; Short=ORF2p; Includes: RecName: Full=Reverse transcriptase; Includes: RecName: Full=Endonuclease;	PF00078.24;PF13966.3	RVT_1;zf-RVT	Reverse transcriptase;zinc-binding in reverse transcriptase
TRINITY_DN62565_c1_g9	945	5.455	116.14	1.55	aquaporin [Gladiolus hybrid cultivar]	GO:0034220;GO:0016021;GO:0016021;GO:0042807;GO:0005887;GO:0009705;GO:0015267;GO:0015267;GO:0015250	BP:ion transmembrane transport;CC:integral component of membrane;CC:integral component of membrane;CC:central vacuole;CC:integral component of plasma membrane;CC:plant-type vacuole membrane;MF:channel activity;MF:channel activity;MF:water channel activity;	K09873	TIP	------	------	COG0580	G:Carbohydrate transport and metabolism	gi|75296029|sp|Q7XA61.1|TIP21_ORYSJ;	RecName: Full=Probable aquaporin TIP2-1; AltName: Full=Tonoplast intrinsic protein 2-1; Short=OsTIP2;1;	PF00230.17	MIP	Major intrinsic protein
TRINITY_DN62597_c0_g1	893	4.835	13.7	276.095	putative germin-like protein 2-1 [Asparagus officinalis]	------	------	------	------	------	------	------	------	gi|75225169|sp|Q6YZA1.1|GL88_ORYSJ;	RecName: Full=Germin-like protein 8-8; Flags: Precursor;	PF00190.19;PF07883.8	Cupin_1;Cupin_2	Cupin;Cupin domain
TRINITY_DN62603_c9_g1	907	1.075	2.495	0	protein of unknown function DUF4283 [Macleaya cordata]	GO:0055114;GO:0008033;GO:0051539;GO:0003824;GO:0010181;GO:0003676;GO:0008270;GO:0003676;GO:0008270;GO:0004519;GO:0004527	BP:oxidation-reduction process;BP:tRNA processing;MF:4 iron, 4 sulfur cluster binding;MF:catalytic activity;MF:FMN binding;MF:nucleic acid binding;MF:zinc ion binding;MF:nucleic acid binding;MF:zinc ion binding;MF:endonuclease activity;MF:exonuclease activity;	------	------	------	------	------	------	------	------	PF14111.3	DUF4283	Domain of unknown function
TRINITY_DN62643_c0_g3	586	36.95	1.49	33.35	probable mitochondrial-processing peptidase subunit beta, mitochondrial isoform X2 [Asparagus officinalis]	GO:0046872;GO:0004222	MF:metal ion binding;MF:metalloendopeptidase activity;	K17732	PMPCB, MAS1	------	------	------	------	gi|85700445|sp|Q42290.2|MPPB_ARATH;	RecName: Full=Probable mitochondrial-processing peptidase subunit beta, mitochondrial; AltName: Full=Beta-MPP; Flags: Precursor;	PF00675.17	Peptidase_M16	Insulinase
TRINITY_DN62653_c4_g1	1882	6.53	17.99	1.56	PREDICTED: tetrahydrocannabinolic acid synthase-like [Musa acuminata subsp. malaccensis]	------	------	------	------	------	------	------	------	gi|75150432|sp|Q8GTB6.1|THCAS_CANSA;	RecName: Full=Tetrahydrocannabinolic acid synthase; Short=THCAS; AltName: Full=Delt;	PF01565.20;PF08031.9	FAD_binding_4;BBE	FAD binding domain;Berberine and berberine like
TRINITY_DN62689_c3_g1	1622	33.73	19.465	3.585	PREDICTED: bax inhibitor 1 [Phoenix dactylifera]	GO:0016021;GO:0016021	CC:integral component of membrane;CC:integral component of membrane;	------	------	------	------	------	------	gi|12229684|sp|Q9LD45.1|BI1_ARATH;	RecName: Full=Bax inhibitor 1; Short=AtBI-1; Short=BI-1;	PF01027.17	Bax1-I	Inhibitor of apoptosis-promoting Bax1
TRINITY_DN62877_c0_g3	765	2.335	1.175	23.47	uncharacterized protein A4U43_C03F5170 [Asparagus officinalis]	GO:0006869;GO:0006869;GO:0008289;GO:0008289	BP:lipid transport;BP:lipid transport;MF:lipid binding;MF:lipid binding;	------	------	------	------	------	------	gi|75216245|sp|Q9ZQI8.1|NLTL2_ARATH;	RecName: Full=Non-specific lipid-transfer protein-like protein At2g13820; Flags: Precursor;	PF14368.3;PF00234.19	LTP_2;Tryp_alpha_amyl	Probable lipid transfer;Protease inhibitor/seed storage/LTP family
TRINITY_DN63031_c2_g2	872	0	9.575	0.18		------	------	------	------	------	------	------	------	------	------	------	------	------
TRINITY_DN63304_c5_g1	340	357.085	201.995	0.62	23.2 kDa heat shock protein, partial [Ananas comosus]	------	------	K13993	HSP20	map04141	Protein processing in endoplasmic reticulum	------	------	gi|232282|sp|P30236.1|HSP41_SOYBN;	RecName: Full=22.0 kDa class IV heat shock protein; Flags: Precursor;	PF00011.18	HSP20	Hsp20/alpha crystallin family
TRINITY_DN63368_c1_g1	947	0.235	0.27	8.835	laccase-3-like [Asparagus officinalis]	GO:0046274;GO:0048046;GO:0005507;GO:0052716	BP:lignin catabolic process;CC:apoplast;MF:copper ion binding;MF:hydroquinon;	K05909	E1.10.3.2	------	------	COG2132	Q:Secondary metabolites biosynthesis, transport and catabolism	gi|75331868|sp|Q941X2.1|LAC3_ORYSJ;	RecName: Full=Laccase-3; AltName: Full=Benzenediol:oxygen oxidoreductase 3; AltName: Full=Diphenol oxidase 3; AltName: Full=Urishiol oxidase 3; Flags: Precursor;	PF00394.19	Cu-oxidase	Multicopper oxidase
TRINITY_DN63486_c2_g1	2396	2.335	0.12	3.835		------	------	------	------	------	------	------	------	------	------	------	------	------
TRINITY_DN63492_c0_g1	515	109.355	1.85	18.52	heat shock cognate 70 kDa protein 2-like [Asparagus officinalis]	------	------	K03283	HSPA1_8	map04144;map04141;map03040	Endocytosis;Protein processing in endoplasmic reticulum;Spliceosome	------	------	gi|75308864|sp|Q9C7X7.1|HSP7N_ARATH;	RecName: Full=Heat shock 70 kDa protein 18; AltName: Full=Heat shock protein 70-18; Short=AtHsp70-18; AltName: Full=Heat-shock protein 70T-1;	PF00012.17;PF06723.10;PF10712.6	HSP70;MreB_Mbl;NAD-GH	Hsp70 protein;MreB/Mbl protein;NAD-specific glutamate dehydrogenase
TRINITY_DN63554_c7_g1	1132	31.88	0.165	8.45		------	------	------	------	------	------	------	------	------	------	------	------	------
TRINITY_DN63645_c2_g2	1633	0	0.075	1.83	putative zinc finger, CCHC-type [Helianthus annuus]	GO:0015074;GO:0015074;GO:0015074;GO:0015074;GO:0003676;GO:0008270;GO:0003676;GO:0003676;GO:0003676;GO:0000166	BP:DNA integration;BP:DNA integration;BP:DNA integration;BP:DNA integration;MF:nucleic acid binding;MF:zinc ion binding;MF:nucleic acid binding;MF:nucleic acid binding;MF:nucleic acid binding;MF:nucleotide binding;	------	------	------	------	------	------	------	------	------	------	------
TRINITY_DN63700_c2_g1	962	7.715	0.5	8.13	uncharacterized protein A4U43_C04F9820 [Asparagus officinalis]	------	------	K04733	IRAK4	------	------	------	------	gi|263419078|sp|C0LGT6.1|EFR_ARATH;	RecName: Full=LRR receptor-like serine/threonine-protein kinase EFR; AltName: Full=Elongation factor Tu receptor; Short=EF-Tu receptor; Flags: Precursor;	PF13855.3;PF12799.4	LRR_8;LRR_4	Leucine rich repeat;Leucine Rich repeats
TRINITY_DN63715_c0_g2	1748	331.54	7.08	74.81	lipoxygenase [Gladiolus hybrid cultivar]	GO:0031408;GO:0031408;GO:0046872;GO:0016702;GO:0046872;GO:0016702	BP:oxylipin biosynthetic process;BP:oxylipin biosynthetic process;MF:metal ion binding;MF:oxidoreductase activity, acting on single donors with incorporation of molecular oxygen, incorporation of two atoms of oxygen;MF:metal ion binding;MF:oxidoreductase activity, acting on single donors with incorporation of molecular oxygen, incorporation of two atoms of oxygen;	K15718	LOX1_5	map00591	Linoleic acid metabolism	------	------	gi|75282482|sp|Q43191.1|LOX15_SOLTU;	RecName: Full=Probable linoleate 9S-lipoxygenase 5; AltName: Full=Leaf lipoxygenase;	PF00305.16	Lipoxygenase	Lipoxygenase
TRINITY_DN63728_c1_g1	1520	25.45	2.285	17.455	G-type lectin S-receptor-like serine/threonine-protein kinase [Apostasia shenzhenica]	GO:0048544;GO:0048544;GO:0048544;GO:0006468;GO:0048544;GO:0016021;GO:0016021;GO:0016021;GO:0016021;GO:0005886;GO:0005524;GO:0030246;GO:0004672;GO:0005524;GO:0030246;GO:0004674;GO:0004714;GO:0005524;GO:0030246;GO:0004674;GO:0005524;GO:0004674	BP:recognition of pollen;BP:recognition of pollen;BP:recognition of pollen;BP:protein phosphorylation;BP:recognition of pollen;CC:integral component of membrane;CC:integral component of membrane;CC:integral component of membrane;CC:integral component of membrane;CC:plasma membrane;MF:ATP binding;MF:carbohydrate binding;MF:protein kinase activity;MF:ATP binding;MF:carbohydrate binding;MF:protein s…	------	------	------	------	------	------	gi|75099051|sp|O64477.1|Y2913_ARATH;	RecName: Full=G-type lectin S-receptor-like serine/threonine-protein kinase At2g19130; Flags: Precursor;	PF00069.22;PF07714.14;PF00954.17;PF08276.8;PF01636.20	Pkinase;Pkinase_Tyr;S_locus_glycop;PAN_2;APH	Protein kinase domain;Protein tyrosine kinase;S-locus glycoprotein domain;PAN-like domain;Phosphotransferase enzyme family
TRINITY_DN63773_c2_g4	1193	0.05	0.045	4.68		------	------	------	------	------	------	------	------	------	------	------	------	------
TRINITY_DN63795_c2_g1	862	8.81	2.37	39	7-deoxyloganetin glucosyltransferase-like [Asparagus officinalis]	GO:0008152;GO:0008152;GO:0008152;GO:0043231;GO:0043231;GO:0016758;GO:0080043;GO:0080044;GO:0080043;GO:0080044	BP:metabolic process;BP:metabolic process;BP:metabolic process;CC:intracellular membrane-bounded organelle;CC:intracellular membrane-bounded organelle;MF:transferase activity, transferring hexosyl groups;MF:quercetin 3-O-glucosyltransferase activity;MF:quercetin 7-O-glucosyltransferase activity;MF:quercetin 3-O-glucosyltransferase activity;MF:quercetin 7-O-glucosyltransferase activity;	K21374	UGT85A	------	------	------	------	gi|334351205|sp|Q9LMF1.2|U85A3_ARATH;	RecName: Full=UDP-glycosyltransferase 85A3;	PF00201.15;PF04101.13	UDPGT;Glyco_tran_28_C	UDP-glucoronosyl and UDP-glucosyl transferase;Glycosyltransferase family 28 C-terminal domain
TRINITY_DN63848_c2_g1	2395	5.635	16.09	15.435	PREDICTED: SH3 and multiple ankyrin repeat domains protein 3-like [Elaeis guineensis]	------	------	------	------	------	------	------	------	------	------	PF00564.21	PB1	PB1 domain
TRINITY_DN63918_c1_g3	835	3.815	8.745	80.295	putative metal-nicotianamine transporter YSL12 [Ananas comosus]	GO:0055085;GO:0055085;GO:0055085;GO:0016021;GO:0016021;GO:0016021	BP:transmembrane transport;BP:transmembrane transport;BP:transmembrane transport;CC:integral component of membrane;CC:integral component of membrane;CC:integral component of membrane;	------	------	------	------	------	------	gi|75206004|sp|Q9SHY2.1|YSL7_ARATH;	RecName: Full=Probable metal-nicotianamine transporter YSL7; AltName: Full=Protein YELLOW STRIPE LIKE 7; Short=AtYSL7;	PF03169.12	OPT	OPT oligopeptide transporter protein
TRINITY_DN63994_c2_g1	433	48.465	42.175	1.55	unknown [Picea sitchensis]	GO:0006457;GO:0006457;GO:0006457;GO:0006457;GO:0005524;GO:0051082;GO:0005524;GO:0051082;GO:0005524;GO:0051082;GO:0005524;GO:0051082	BP:protein folding;BP:protein folding;BP:protein folding;BP:protein folding;MF:ATP binding;MF:unfolded protein binding;MF:ATP binding;MF:unfolded protein binding;MF:ATP binding;MF:unfolded protein binding;MF:ATP binding;MF:unfolded protein binding;	K03283	HSPA1_8	map04144;map04141;map03040	Endocytosis;Protein processing in endoplasmic reticulum;Spliceosome	------	------	gi|399942|sp|Q02028.1|HSP7S_PEA;	RecName: Full=Stromal 70 kDa heat shock-related protein, chloroplastic; Flags: Precursor;	PF00012.17	HSP70	Hsp70 protein
TRINITY_DN64036_c3_g1	789	117.915	39.845	209.83	chalcone synthase [Iris domestica]	GO:0009058;GO:0009058;GO:0009058;GO:0009058;GO:0016747;GO:0016747;GO:0016747;GO:0016747	BP:biosynthetic process;BP:biosynthetic process;BP:biosynthetic process;BP:biosynthetic process;MF:transferase activity, transferring acyl groups other than amino-acyl groups;MF:transferase activity, transferring acyl groups other than amino-acyl groups;MF:transferase activity, transferring acyl groups other than amino-acyl groups;MF:transferase activity, transferring acyl groups other than amino…	K00660	CHS	map04712;map00941	Circadian rhythm - plant;Flavonoid biosynthesis	------	------	gi|75299815|sp|Q8H4L3.1|CHS2_ORYSJ;	RecName: Full=Chalcone synthase 2; Short=OsCHS2; AltName: Full=Naregenin-chalcone synthase;	PF00195.16	Chal_sti_synt_N	Chalcone and stilbene synthases, N-terminal domain
TRINITY_DN64048_c3_g2	2021	0.04	0	0.885		------	------	------	------	------	------	------	------	------	------	------	------	------
TRINITY_DN64093_c1_g6	2368	0.16	0	1.92	phosphate transporter PHO1-3 [Asparagus officinalis]	GO:0016021	CC:integral component of membrane;	------	------	------	------	COG5409	T:Signal transduction mechanisms	gi|75163762|sp|Q93ZF5.1|PHO11_ARATH;	RecName: Full=Phosphate transporter PHO1 homolog 1; AltName: Full=Protein PHO1 homolog 1; Short=AtPHO1;H1;	PF03124.11;PF03105.16	EXS;SPX	EXS family;SPX domain
TRINITY_DN64122_c5_g1	3008	10.445	2.265	52.925	PREDICTED: putative glycerol-3-phosphate transporter 1 [Musa acuminata subsp. malaccensis]	GO:0016021;GO:0016021;GO:0022857;GO:0022857	CC:integral component of membrane;CC:integral component of membrane;MF:transmembrane transporter activity;MF:transmembrane transporter activity;	K13783	SLC37A1_2	------	------	COG2271	G:Carbohydrate transport and metabolism	gi|75268167|sp|Q9C5L3.1|GLPT1_ARATH;	RecName: Full=Putative glycerol-3-phosphate transporter 1; Short=G-3-P transporter 1; AltName: Full=Glycerol-3-phosphate permease 1; Short=AtG3Pp1; Short=G-3-P permease 1; AltName: Full=Protein PHOSPHATE STARVATION-INDUCED GENE 3; Short=AtPS3;	PF07690.13;PF00083.21	MFS_1;Sugar_tr	Major Facilitator Superfamily;Sugar
TRINITY_DN64163_c2_g1	2497	0.195	0.79	6.18	nucleolar complex protein 3 homolog [Momordica charantia]	GO:0005730	CC:nucleolus;	K14834	NOC3	------	------	------	------	------	------	------	------	------
TRINITY_DN64204_c6_g5	482	17.31	24.68	0.105	hypothetical protein CUMW_144820 [Citrus unshiu]	------	------	------	------	------	------	------	------	------	------	------	------	------
TRINITY_DN64420_c3_g5	559	1.685	0.15	7.455		------	------	------	------	------	------	------	------	gi|108860835|sp|Q2MID2.1|NU1C_SOLBU;	RecName: Full=NA;	PF00146.18	NADHdh	NADH dehydrogenase
TRINITY_DN64470_c10_g1	705	5.61	0.235	15.37		------	------	------	------	------	------	------	------	------	------	------	------	------
TRINITY_DN64477_c1_g2	1188	2.64	0.375	5.055	PREDICTED: receptor-like serine/threonine-protein kinase SD1-8 isoform X1 [Elaeis guineensis]	GO:0048544;GO:0016021;GO:0005524;GO:0004674	BP:recognition of pollen;CC:integral component of membrane;MF:ATP binding;MF:protein serine/threonine kinase activity;	------	------	------	------	------	------	gi|363548529|sp|O81832.4|Y4729_ARATH;	RecName: Full=G-type lectin S-receptor-like serine/threonine-protein kinase At4g27290; Flags: Precursor;	PF01453.21;PF00954.17;PF08276.8	B_lectin;S_locus_glycop;PAN_2	D-mannose binding lectin;S-locus glycoprotein domain;PAN-like domain
TRINITY_DN64502_c2_g1	2495	160.25	48.275	448.35	C	GO:0016021;GO:0004252;GO:0004252	CC:integral component of membrane;MF:serine-type endopeptidase activity;MF:serine-type endopeptidase activity;	------	------	------	------	------	------	gi|75264090|sp|Q9LNU1.1|CRSP_ARATH;	RecName: Full=C;	PF00082.19;PF02225.19	Peptidase_S8;PA	Subtilase family;PA domain
TRINITY_DN64523_c5_g1	1607	0.94	1.34	33.34	PREDICTED: scopoletin glucosyltransferase-like [Phoenix dactylifera]	GO:0008152;GO:0016758	BP:metabolic process;MF:transferase activity, transferring hexosyl groups;	------	------	------	------	------	------	gi|75308024|sp|Q9AT54.1|SCGT_TOBAC;	RecName: Full=Scopoletin glucosyltransferase; AltName: Full=Phenylpropanoid:glucosyltransferase 1;	PF00201.15;PF13579.3	UDPGT;Glyco_trans_4_4	UDP-glucoronosyl and UDP-glucosyl transferase;Glycosyl transferase 4-like domain
TRINITY_DN64571_c3_g1	556	914.72	12.485	418.695		------	------	------	------	------	------	------	------	------	------	------	------	------
TRINITY_DN64571_c3_g3	618	58.04	5.49	256.15		------	------	------	------	------	------	------	------	------	------	------	------	------
TRINITY_DN64637_c3_g1	1286	0	20.175	3.6		------	------	------	------	------	------	------	------	------	------	------	------	------
TRINITY_DN64763_c5_g1	3445	195.56	0.51	12.475	probable LRR receptor-like serine/threonine-protein kinase At3g47570 [Asparagus officinalis]	------	------	K04733	IRAK4	------	------	------	------	gi|51338834|sp|Q9SYQ8.3|CLV1_ARATH;	RecName: Full=Receptor protein kinase CLAVATA1; Flags: Precursor;	PF13855.3;PF12799.4;PF08263.9;PF00069.22;PF07714.14;PF01636.20	LRR_8;LRR_4;LRRNT_2;Pkinase;Pkinase_Tyr;APH	Leucine rich repeat;Leucine Rich repeats;Leucine rich repeat N-terminal domain;Protein kinase domain;Protein tyrosine kinase;Phosphotransferase enzyme family
TRINITY_DN64780_c6_g1	913	0	0	3.825	PREDICTED: expansin-A1-like [Populus euphratica]	GO:0009664;GO:0005618;GO:0005576;GO:0016020	BP:plant-type cell wall organization;CC:cell wall;CC:extracellular region;CC:membrane;	------	------	------	------	------	------	gi|115502385|sp|O80622.2|EXP15_ARATH;	RecName: Full=Expansin-A15; Short=AtEXPA15; AltName: Full=Alpha-expansin-15; Short=At-EXP15; Short=AtEx15; AltName: Full=Ath-ExpAlpha-1.3; Flags: Precursor;	PF01357.18	Pollen_allerg_1	Pollen allergen
TRINITY_DN64848_c7_g3	425	32.82	0	22.445	probable LRR receptor-like serine/threonine-protein kinase At3g47570 [Asparagus officinalis]	------	------	------	------	------	------	------	------	gi|264664489|sp|C0LGP4.1|Y3475_ARATH;	RecName: Full=Probable LRR receptor-like serine/threonine-protein kinase At3g47570; Flags: Precursor;	PF13855.3;PF12799.4	LRR_8;LRR_4	Leucine rich repeat;Leucine Rich repeats
TRINITY_DN70902_c0_g1	606	0	0	4.5	uncharacterized protein LOC109720554 [Ananas comosus]	------	------	------	------	------	------	------	------	------	------	------	------	------
