# Supplementary material for: Iris lactea var. chinensis Plant Drought Tolerance Depends on Response of Proline Metabolism, Transcription Factors, Transporters and the ROS Scavenging System
Source: Research Square preprint supplement (doi:10.21203/rs.3.rs-1312283/v1), 2022-02-08
Supplement: Supplementary file 3 [file 3fa46f698f6640fed0da67a2.xlsx]

## Sheet: Table S5
Table S5. The 29 DEGs up-regulated in T/CK and down-regulated in R/T
Gene_id	Log2FC(T/CK)	Log2FC(R/T)	Log2FC(R/CK)	CK	T	R	NR description	GO_id	KO_id	KO_name	Pathway_id	COG	swissprot	pfam
TRINITY_DN61303_c2_g1	9.53761	-8.92955	0.616839	0.22	159.185	0.6	XP_019261567.1(PREDICTED: vicilin-like antimicrobial peptides 2-3 [Nicotiana attenuata])	GO:0045735(molecular_function:nutrient reservoir activity); GO:0045735(molecular_function:nutrient reservoir activity); GO:0045735(molecular_function:nutrient reservoir activity)					gi|75266171|sp|Q9SPL4.1|AMP22_MACIN(RecName: Full=Vicilin-like antimicrobial peptides 2-2; AltName: Full=MiAMP2; Contains: RecName: Full=Antimicrobial peptide 2a; AltName: Full=MiAMP2a; Contains: RecName: Full=Antimicrobial peptide 2b; AltName: Full=MiAMP2b; Contains: RecName: Full=Antimicrobial peptide 2c-1; AltName: Full=MiAMP2c-1; Contains: RecName: Full=Antimicrobial peptide 2c-2; AltName: Fu…	PF00190.19(Cupin_1:Cupin); PF07883.8(Cupin_2:Cupin domain)
TRINITY_DN45420_c1_g3	9.35674	-6.91192	2.45833	0.055	23.715	0.735	ONK72264.1(uncharacterized protein A4U43_C04F17540 [Asparagus officinalis])	GO:0000287(molecular_function:magnesium ion binding); GO:0010333(molecular_function:terpene synthase activity); GO:0008152(biological_process:metabolic process); GO:0000287(molecular_function:magnesium ion binding); GO:0010333(molecular_function:terpene synthase activity); GO:0008152(biological_process:metabolic process)	K15803	GERD	map00909(Sesquiterpenoid and triterpenoid biosynthesis)		gi|410591621|sp|B3TPQ6.1|BCUSY_MAGGA(RecName: Full=Beta-cubebene synthase; Short=Mg25)	PF03936.13(Terpene_synth_C:Terpene synthase family, metal binding domain)
TRINITY_DN53906_c2_g2	4.22105	-4.76235	-0.538926	0.985	18.05	0.69	XP_020264200.1(fasciclin-like arabinogalactan protein 7 [Asparagus officinalis])						gi|38257788|sp|Q9SJ81.1|FLA7_ARATH(RecName: Full=Fasciclin-like arabinogalactan protein 7; Flags: Precursor)	PF02469.19(Fasciclin:Fasciclin domain)
TRINITY_DN52504_c5_g3	7.05245	-6.11242	0.927401	3.515	193.695	5.545	None	None					None	PF00257.16(Dehydrin:Dehydrin)
TRINITY_DN58931_c2_g2	3.03223	-3.90367	-0.873475	33.29	229.515	19.015	XP_008782097.1(PREDICTED: GDSL esterase/lipase At3g26430-like [Phoenix dactylifera])	GO:0016788(molecular_function:hydrolase activity, acting on ester bonds); GO:0004560(molecular_function:alpha-L-fucosidase activity); GO:0016788(molecular_function:hydrolase activity, acting on ester bonds); GO:0008152(biological_process:metabolic process)					gi|75273423|sp|Q9LIN2.1|GDL53_ARATH(RecName: Full=GDSL esterase/lipase At3g26430; AltName: Full=Extracellular lipase At3g26430; Flags: Precursor)	PF00657.19(Lipase_GDSL:GDSL-like Lipase/Acylhydrolase)
TRINITY_DN62565_c1_g9	4.57528	-6.4	-1.82668	5.455	116.14	1.55	AFU51579.1(aquaporin [Gladiolus hybrid cultivar])	GO:0015267(molecular_function:channel activity); GO:0016021(cellular_component:integral component of membrane); GO:0015267(molecular_function:channel activity); GO:0016021(cellular_component:integral component of membrane); GO:0015250(molecular_function:water channel activity); GO:0034220(biological_process:ion transmembrane transport); GO:0042807(cellular_component:central vacuole); GO:0005887(c…	K09873	TIP		COG0580(G:Carbohydrate transport and metabolism )	gi|75296029|sp|Q7XA61.1|TIP21_ORYSJ(RecName: Full=Probable aquaporin TIP2-1; AltName: Full=Tonoplast intrinsic protein 2-1; Short=OsTIP2;1)	PF00230.17(MIP:Major intrinsic protein)
TRINITY_DN50447_c1_g1	5.03573	-6.75196	-1.67609	1.21	36.115	0.345	XP_020270618.1(LOW QUALITY PROTEIN: heptahelical transmembrane protein ADIPOR1-like [Asparagus officinalis])		K07297	ADIPOR			gi|75163774|sp|Q93ZH9.1|HHP1_ARATH(RecName: Full=Heptahelical transmembrane protein 1; AltName: Full=PAQR family protein HHP1)	PF03006.17(HlyIII:Haemolysin-III related)
TRINITY_DN63031_c2_g2	9.54338	-5.89844	3.66565	0	9.575	0.18	None	None	None	None	None	None	None	None
TRINITY_DN49685_c5_g2	5.42687	-2.85508	2.57433	2.695	108.13	15.805	XP_020093871.1(thaumatin-like protein 1b [Ananas comosus])						gi|25091405|sp|P83332.1|TLP1_PRUPE(RecName: Full=Thaumatin-like protein 1; AltName: Full=PpAZ44; Flags: Precursor [Prunus persica])	PF00314.14(Thaumatin:Thaumatin family)
TRINITY_DN52400_c0_g1	5.74324	-8.71226	-2.98918	0.09	4.535	0.01	XP_008795662.1(PREDICTED: probable polyol transporter 6 [Phoenix dactylifera])	GO:0022857(molecular_function:transmembrane transporter activity); GO:0016021(cellular_component:integral component of membrane)					gi|118573109|sp|Q8GXR2.2|PLT6_ARATH(RecName: Full=Probable polyol transporter 6)	PF00083.21(Sugar_tr:Sugar (and other) transporter); PF07690.13(MFS_1:Major Facilitator Superfamily); PF06609.10(TRI12:Fungal trichothecene efflux pump (TRI12))
TRINITY_DN50582_c1_g1	3.06159	-2.75152	0.307322	4.535	38.235	5.715	XP_009388299.1(PREDICTED: uncharacterized protein LOC103975117 [Musa acuminata subsp. malaccensis])						None
TRINITY_DN50120_c6_g1	4.34428	-4.90245	-0.562915	5.52	104.345	3.9	XP_019444764.1(PREDICTED: uncharacterized protein LOC109348691 isoform X1 [Lupinus angustifolius])						None
TRINITY_DN47370_c0_g1	5.62996	-4.77611	0.844511	12.615	859.99	24.265	None	None					None	PF00257.16(Dehydrin:Dehydrin)
TRINITY_DN41652_c0_g1	3.72231	-3.7466	-0.0324543	1.155	14.825	1.225	XP_020246807.1(LOW QUALITY PROTEIN: oil body-associated protein 1A-like [Asparagus officinalis])						gi|1027923650|sp|B4FFZ9.1|OBP1A_MAIZE(RecName: Full=Oil body-associated protein 1A)	PF06884.8(DUF1264:Protein of unknown function (DUF1264))
TRINITY_DN56624_c1_g1	7.88564	-8.03321	0	0	3.415	0	XP_018467920.1(PREDICTED: non-specific lipid-transfer protein-like protein At2g13820 [Raphanus sativus])						gi|75216245|sp|Q9ZQI8.1|NLTL2_ARATH(RecName: Full=Non-specific lipid-transfer protein-like protein At2g13820; Flags: Precursor)	PF14368.3(LTP_2:Probable lipid transfer); PF00234.19(Tryp_alpha_amyl:Protease inhibitor/seed storage/LTP family)
TRINITY_DN47370_c0_g2	5.4582	-5.03743	0.404282	16.38	2427.53	47.595	None	None					None	PF00257.16(Dehydrin:Dehydrin)
TRINITY_DN59786_c1_g1	3.86637	-5.65222	-1.77136	2.635	38.655	0.765	None	None	None	None	None	None	None	None
TRINITY_DN57042_c0_g1	5.52614	-5.15113	0.36252	0.4	15.615	0.505	XP_009407081.1(PREDICTED: uncharacterized protein LOC103989860 [Musa acuminata subsp. malaccensis])	GO:0016021(cellular_component:integral component of membrane); GO:0016021(cellular_component:integral component of membrane)					None	PF05553.8(DUF761:Cotton fibre expressed protein)
TRINITY_DN50610_c3_g4	3.76436	-5.30029	-1.51109	0.845	10.35	0.285	None	None	None	None	None	None	None	None
TRINITY_DN55034_c5_g1	7.33287	-7.48241	0	0	1.47	0	None	None	None	None	None	None	None	None
TRINITY_DN48682_c4_g1	3.32623	-2.61046	0.718078	8.93	84.115	14.635	XP_020700752.1(uncharacterized protein LOC110112773 [Dendrobium catenatum])						None
TRINITY_DN56421_c1_g1	3.62122	-3.94198	-0.325768	1.52	16.95	1.33	XP_008806920.1(PREDICTED: LOW QUALITY PROTEIN: transketolase, chloroplastic-like [Phoenix dactylifera])	GO:0004802(molecular_function:transketolase activity); GO:0008152(biological_process:metabolic process)	K00615	E2.2.1.1, tktA, tktB	map00030(Pentose phosphate pathway); map00710(Carbon fixation in photosynthetic organisms)		gi|75247623|sp|Q8RWV0.1|TKTC1_ARATH(RecName: Full=Transketolase-1, chloroplastic; Short=TK; Flags: Precursor)	PF00456.18(Transketolase_N:Transketolase, thiamine diphosphate binding domain); PF02775.18(TPP_enzyme_C:Thiamine pyrophosphate enzyme, C-terminal TPP binding domain); PF00676.17(E1_dh:Dehydrogenase E1 component); PF02779.21(Transket_pyr:Transketolase, pyrimidine binding domain); PF02780.17(Transketolase_C:Transketolase, C-terminal domain)
TRINITY_DN43242_c5_g1	3.60298	-3.5754	0.0322546	6.09	65.295	5.81	None	None					None	PF02068.13(Metallothio_PEC:Plant PEC family metallothionein)
TRINITY_DN51749_c0_g1	3.53527	-5.00891	-1.46823	0.7	24.45	0.26	None	None	None	None	None	None	None	None
TRINITY_DN48943_c3_g1	4.33337	-3.71124	0.611577	3.67	69.565	5.96	XP_010916323.1(PREDICTED: uncharacterized protein LOC105041167 [Elaeis guineensis])	GO:0016021(cellular_component:integral component of membrane); GO:0016021(cellular_component:integral component of membrane)					None
TRINITY_DN58151_c4_g1	6.07528	-3.9198	2.15216	0.945	60.17	4.45	XP_020269813.1(non-specific lipid-transfer protein A-like [Asparagus officinalis])	GO:0008289(molecular_function:lipid binding); GO:0006869(biological_process:lipid transport)					gi|3287877|sp|P81402.1|NLTP1_PRUPE(RecName: Full=Non-specific lipid-transfer protein 1; Short=LTP 1; AltName: Full=Allergen Pru p 1; AltName: Full=Major allergen Pru p 3; AltName: Allergen=Pru p 3)	PF00234.19(Tryp_alpha_amyl:Protease inhibitor/seed storage/LTP family); PF14368.3(LTP_2:Probable lipid transfer)
TRINITY_DN55896_c2_g6	3.74461	-2.84852	0.899471	0.455	6.155	0.915	None	None	None	None	None	None	None	None
TRINITY_DN45683_c3_g2	3.8331	-2.0999	1.73126	0.515	8.655	2.025	OAY73615.1(Premnaspirodiene oxygenase [Ananas comosus])	GO:0020037(molecular_function:heme binding); GO:0005506(molecular_function:iron ion binding); GO:0004497(molecular_function:monooxygenase activity); GO:0016705(molecular_function:oxidoreductase activity, acting on paired donors, with incorporation or reduction of molecular oxygen); GO:0020037(molecular_function:heme binding); GO:0005506(molecular_function:iron ion binding); GO:0004497(molecular_f…					gi|5915836|sp|P93531.1|C71D7_SOLCH(RecName: Full=Cytochrome P450 71D7 [Solanum chacoense])	PF00067.19(p450:Cytochrome P450)
TRINITY_DN60247_c0_g2	5.03135	-3.07993	1.9419	0.07	2.175	0.275	XP_010935528.1(PREDICTED: primary amine oxidase [Elaeis guineensis])	GO:0005507(molecular_function:copper ion binding); GO:0008131(molecular_function:primary amine oxidase activity); GO:0048038(molecular_function:quinone binding); GO:0009308(biological_process:amine metabolic process)	K00276	AOC3, AOC2, tynA	map00260(Glycine, serine and threonine metabolism); map00960(Tropane, piperidine and pyridine alkaloid biosynthesis); map00950(Isoquinoline alkaloid biosynthesis); map00360(Phenylalanine metabolism); map00350(Tyrosine metabolism); map00410(beta-Alanine metabolism)		gi|2501337|sp|Q43077.1|AMO_PEA(RecName: Full=Primary amine oxidase; AltName: Full=Amine oxidase [copper-containing]; Flags: Precursor)	PF01179.17(Cu_amine_oxid:Copper amine oxidase, enzyme domain); PF02728.13(Cu_amine_oxidN3:Copper amine oxidase, N3 domain); PF02727.13(Cu_amine_oxidN2:Copper amine oxidase, N2 domain)
