# Supplementary material for: Iris lactea var. chinensis Plant Drought Tolerance Depends on Response of Proline Metabolism, Transcription Factors, Transporters and the ROS Scavenging System
Source: Research Square preprint supplement (doi:10.21203/rs.3.rs-1312283/v1), 2022-02-08
Supplement: Supplementary file 4 [file 89e90e355c07ec24209022eb.xlsx]

## Sheet: Table S16
Table S16. The differentially expressed unigenes associated with proline metabolism pathway
Gene ID	Log2FC(T/CK)	Log2FC(R/T)	Log2FC(R/CK)	Length	GO_id	GO_term	Go_description	KO_id	KO_name	Pathway_id	Pathway_definition	COG_id	COG_Functional Categories	NR_hit-name	NR_description	Swiss-Prot_hit-name	Swiss-Prot_description	Pfam_id	Domain	Domain description
ProDH
TRINITY_DN54515_c5_g1	-4.56816	2.16805	-2.40275	644	GO:0006562;;GO:0006562;;GO:0004657;;GO:0004657;	biological_process;;biological_process;;molecular_function;;molecular_function;;	BP:proline catabolic process;;BP:proline catabolic process;;MF:proline dehydrogenase activity;;MF:proline dehydrogenase activity;;	K00318	PRODH	map00330	Arginine and proline metabolism	------	------	XP_008775336.1	PREDICTED: proline dehydrogenase 1, mitochondrial-like [Phoenix dactylifera]	gi|6685798|sp|P92983.2|PROD1_ARATH;;	RecName: Full=Proline dehydrogenase 1, mitochondrial; AltName: Full=Osmotic stress-induced proline dehydrogenase; AltName: Full=Proline oxidase; AltName: Full=Protein EARLY RESPONSIVE TO DEHYDRATION 5; Flags: Precursor;;	PF01619.15	Pro_dh	Proline dehydrogenase
TRINITY_DN63224_c0_g1	-2.36644	0.480361	-1.88488	1133	GO:0006562;;GO:0004657;	biological_process;;molecular_function;;	BP:proline catabolic process;;MF:proline dehydrogenase activity;;	K00318	PRODH	map00330	Arginine and proline metabolism	------	------	XP_008775336.1	PREDICTED: proline dehydrogenase 1, mitochondrial-like [Phoenix dactylifera]	gi|6685798|sp|P92983.2|PROD1_ARATH;;	RecName: Full=Proline dehydrogenase 1, mitochondrial; AltName: Full=Osmotic stress-induced proline dehydrogenase; AltName: Full=Proline oxidase; AltName: Full=Protein EARLY RESPONSIVE TO DEHYDRATION 5; Flags: Precursor;;	PF01619.15	Pro_dh	Proline dehydrogenase
TRINITY_DN63224_c0_g4	-8.03776	4.32085	-3.7027	409	GO:0006562;;GO:0004657;	biological_process;;molecular_function;;	BP:proline catabolic process;;MF:proline dehydrogenase activity;;	K00318	PRODH	map00330	Arginine and proline metabolism	------	------	XP_020248662.1	proline dehydrogenase 2, mitochondrial-like [Asparagus officinalis]	gi|75126937|sp|Q6NKX1.1|PROD2_ARATH;;	RecName: Full=Proline dehydrogenase 2, mitochondrial; AltName: Full=Osmotic stress-induced proline dehydrogenase; AltName: Full=Proline oxidase; Flags: Precursor;;	PF01619.15	Pro_dh	Proline dehydrogenase
TRINITY_DN63738_c4_g2	-3.77509	1.87521	-1.89999	1416	GO:0006562;;GO:0006562;;GO:0006562;;GO:0006562;;GO:0004657;;GO:0004657;;GO:0004657;;GO:0004657;	biological_process;;biological_process;;biological_process;;biological_process;;molecular_function;;molecular_function;;molecular_function;;molecular_function;;	BP:proline catabolic process;;BP:proline catabolic process;;BP:proline catabolic process;;BP:proline catabolic process;;MF:proline dehydrogenase activity;;MF:proline dehydrogenase activity;;MF:proline dehydrogenase activity;;MF:proline dehydrogenase activity;;	K00318	PRODH	map00330	Arginine and proline metabolism	------	------	XP_020083925.1	proline dehydrogenase 1, mitochondrial-like [Ananas comosus]	gi|6685798|sp|P92983.2|PROD1_ARATH;;	RecName: Full=Proline dehydrogenase 1, mitochondrial; AltName: Full=Osmotic stress-induced proline dehydrogenase; AltName: Full=Proline oxidase; AltName: Full=Protein EARLY RESPONSIVE TO DEHYDRATION 5; Flags: Precursor;;	PF01619.15	Pro_dh	Proline dehydrogenase
TRINITY_DN42797_c0_g1	-4.02426	2.23443	-1.7908	562	GO:0006562;;GO:0004657;	biological_process;;molecular_function;;	BP:proline catabolic process;;MF:proline dehydrogenase activity;;	K00318	PRODH	map00330	Arginine and proline metabolism	------	------	XP_020248662.1	proline dehydrogenase 2, mitochondrial-like [Asparagus officinalis]	gi|6685798|sp|P92983.2|PROD1_ARATH;;	RecName: Full=Proline dehydrogenase 1, mitochondrial; AltName: Full=Osmotic stress-induced proline dehydrogenase; AltName: Full=Proline oxidase; AltName: Full=Protein EARLY RESPONSIVE TO DEHYDRATION 5; Flags: Precursor;;	------	------	------
SPE
TRINITY_DN47288_c0_g1	-1.77751	0.553893	-1.2252	3103	------	------	------	K00797	speE, SRM	map00270;;map00480;;map00330;;map00410	Cysteine and methionine metabolism;;Glutathione metabolism;;Arginine and proline metabolism;;beta-Alanine metabolism	------	------	XP_020678597.1	spermidine synthase 1-like isoform X2 [Dendrobium catenatum]	gi|12229998|sp|Q9SMB1.1|SPD1_ORYSJ;;	RecName: Full=Spermidine synthase 1; Short=SPDSY 1; AltName: Full=Putrescine aminopropyltransferase 1;;	PF01564.14	Spermine_synth	Spermine/spermidine synthase
APX
TRINITY_DN64552_c0_g7	-6.86421	7.32404	0.446859	605	GO:0006979;;GO:0006979;;GO:0006979;;GO:0020037;;GO:0004601;;GO:0020037;;GO:0004601;;GO:0020037;;GO:0004601;	biological_process;;biological_process;;biological_process;;molecular_function;;molecular_function;;molecular_function;;molecular_function;;molecular_function;;molecular_function;;	BP:response to oxidative stress;;BP:response to oxidative stress;;BP:response to oxidative stress;;MF:heme binding;;MF:peroxidase activity;;MF:heme binding;;MF:peroxidase activity;;MF:heme binding;;MF:peroxidase activity;;	K00434	E1.11.1.11	map00480;;map00053	Glutathione metabolism;;Ascorbate and aldarate metabolism	------	------	XP_020276942.1	L-ascorbate peroxidase 2, cytosolic [Asparagus officinalis]	gi|122247194|sp|Q10N21.1|APX1_ORYSJ;;	RecName: Full=L-ascorbate peroxidase 1, cytosolic; Short=APXa; AltName: Full=OsAPx01;;	------	------	------
ADC
TRINITY_DN54907_c1_g2	-3.55359	0.262493	-3.29748	2561	GO:0006527;;GO:0008295;;GO:0006527;;GO:0008295;;GO:0006527;;GO:0008295;;GO:0008792;;GO:0008792;;GO:0008792;	biological_process;;biological_process;;biological_process;;biological_process;;biological_process;;biological_process;;molecular_function;;molecular_function;;molecular_function;;	BP:arginine catabolic process;;BP:spermidine biosynthetic process;;BP:arginine catabolic process;;BP:spermidine biosynthetic process;;BP:arginine catabolic process;;BP:spermidine biosynthetic process;;MF:arginine decarboxylase activity;;MF:arginine decarboxylase activity;;MF:arginine decarboxylase activity;;	K01583	E4.1.1.19	map00330	Arginine and proline metabolism	COG1166	E:Amino acid transport and metabolism	XP_020596278.1	LOW QUALITY PROTEIN: arginine decarboxylase-like [Phalaenopsis equestris]	gi|3914997|sp|Q43075.1|SPE1_PEA;;	RecName: Full=Arginine decarboxylase; Short=ADC; Short=ARGDC;;	PF02784.13;;PF00278.19	Orn_Arg_deC_N;;Orn_DAP_Arg_deC	Pyridoxal-dependent decarboxylase, pyridoxal binding domain;;Pyridoxal-dependent decarboxylase, C-terminal sheet domain
