# Supplementary material for: Iris lactea var. chinensis Plant Drought Tolerance Depends on Response of Proline Metabolism, Transcription Factors, Transporters and the ROS Scavenging System
Source: Research Square preprint supplement (doi:10.21203/rs.3.rs-1312283/v1), 2022-02-08
Supplement: Supplementary file 5 [file 8d8e4c5cff7d48ce52d42aff.xls]

## Sheet: Sheet1
Gene	Description	Gene Sequence	Sequences（5’-3’)
			Forward	Reverse
ERF053	Ethylene-responsive transcription factor ERF053	ATGCCGGTTCCGTTCGTCGGCGGCGGCGGCCCGACGAAGCTGTACCGGGGGGTGCGGCAGCGGCACTGGGGGAAGTGGGTGGCGGAGATCCGCCTGCCGAGGAACCGCACGCGCCTGTGGCTCGGCACGTTCGACACCGCGGAGGACGCCGCGCTCGCGTACGACCGCGAGGCGTTCAAGCTCCGCGGCGAGAACGCCAGGCTCAATTTCCCGGACCTCTTCCTCGGTAATAAAAATGGAAGTGGTAGCGTACAAGAAGGAACAGCGGAACCTTCTCCTCTATCTGCTTCTGCAACTCCGGAAGACTCTAAACAGCGACAGCAGAATCCGGAGACCGCTCCGGAAGCGTCGGTAGTCACAGCCGACGAAACCGAGCAGCCTCCACCACAGCAGCAGCAG…	CTCAATTTCCCGGACCTCTT	GTTTCGTCGGCTGTGACTAC
HSPA1_8	Heat Shock 70kDa Protein 1/8	GAAGATTGTTGTCCCTGGTCCTTGTCCTCTCACCTTCATAAACCTGGATCAAGACACCAGGCTGGTTGTCCGAATAGGTAGAGAAAACCTGCTCTTTCTTGGTAGGGATGGTGGTGTTCCTCGGGATCAGAACAGTCATCACACCTCCAGCAGTCTCAAGACCAAGGGAGAGAGGAGTGACATCAAGCAGAAGCAAGTCCTGCACCTTCTCATTACCCTCACCGCTCAGGATGGCAGCCTGGACAGCAGCACCATAAGCAACAGCCTCGTCAGGGTTGATGCTCTTGCAGAGCTCCTTCCCATTGAAGAAGTCCTGGAGTAGCTGCTGTACTTTGGGAATACGGGTAGACCCACCAACAAGCACAACATCATGGACTGTGCTCTTGTCCATCTTGGCAT…	CTCAAACACTTCTCAACAGG	CTCAAACACTTCTCAACAGG
ADC1	Arginine decarboxylase 1	GGAAAATGCAAGCAAAATATTATACTCAAGCTCGGTCCCAAAATTGGACTTACATCATAATGTTGGATTATTCAAACTCCTCTTCTTCTTCCAACTTAGAAAAAGAGGTACAGGAGACTTAAAACAAAAGCGATTCACTCAATGTTTGAAACATGAAATTATTTATTTTCTTAGCAGATATTAGGAAAATGCCGATCATAGGTCACCCATTCAGGTCCCATTTGGCTCCGTCACCACCGCCCGCCGCCGTAATGAGATACGGCATGTTGTTGAACGCCGTTGCAAGCTGACGGCACGCTGCAGCGCCACCACCGTACTCCTCTACACGCCTCTTGAGCGCGTCGTACATGAGCTCCGGCTCGTGCTGCATTGTCCTCAGCACGTCCGCACTCGAAGGCC…	ACATCCCAAGATAGTATCCT	TCAACCTGTCGATATTCACG
CDPK	Calcium-dependent protein kinase	CCGTCACTTATGCTCGGCCAAGGCTTCCGCCGGAAGTCAGGTTTGTTCCTTAAGACCTCTTTGAATATTCCATCCTCGGTTTTATCCCAAAAGGGACGCCTTCCACAGAGCAAAATATAGGTGATCACACCAATGCTCCAAACATCAGACTCAGGCCCAGACTTACGCTTTAGTACTTCTGGAGCAACATAGTAGGCACTACCCACAATGTCATGAAATTTTCTCCCTGGCTTTATAAAATCTGAGAGGCCAAAATCTGTTGCTTTCAGAGGAGAATCCTCTTTAGTTGATTTAAAAAGAAAGTTCTCAGGTTTCATGTCACGGTGTACTAAACCATGCAAATGGCACTCAGCTGCAACTTTGAGCATCTGCCGTACTACTATTGCAGCATCTTTCTCA…	AAGTTCTCAGGTTTCATGTC	CCATGAGAATGTTGTTCACT
MYBP	Myb-related protein	CAATCCCACGGCTGAGCAGCTTCCTTCTGATGTGTGTGTTCCAGTAGTTCTTGATCTCGTTGTCGGTTCTCCCTGGTAATCTCCCAGCTATAAGCGACCACTTGTTGCCGAGGAGGCTGTGGAGTTTGATGATGAGGTGGTCCTCCTCGTCGGTGAAGTTGCCCCGCTTGAGGTCGGGGCGGAGGTAGTTGATCCAGCGTAGCCGGCAGCTCTTGCCGCACCGGAGCAGGCCCGCGGCCTTGGGGAGGGATCTCCAGCACCCCTCCCCGTGCGTGCGTATGTGCGCTATCAGCCTCTCGTCCTCCTCCTTGGTCCATGCCCCCTTGTTCGTGTGCTCCTTCTCGCAGCAAGGAGACCGTCCCATAACTAAATTCCCCCTTTCCTTTCCTTTCCTTTCCT…	CGTATGTGCGCTATCAGCCT	GAAAGGGGGAATTTAGTTAT
ABCC2	ATP binding cassette subfamily C member 2	CTTGCATGAAACCTGTTACAATTCATCTGGGTACCAAATAAATAGGTTACCAGTCTGGACTAATTCAACTTTTGTCCTACAGAAGTAGGTGCCAATTGCCATCAGAATTAGAAAAATATGACTTTGATTTTCAAAATAAATAGAGAATTTAGTATTCAACTGTAACACACGAAAATCAAATTGCTGTAACCCCCTTAGGGAGCCCTCTCTACTCTTTTCTGCTGTTAGATCCCCAAACCTTCTTCTCTGTGTTAATGTGTATCATCGTAAATCTTTGTGGTGTATTTTAGTTGCGGATTCTTCCTTGTGCTATTCCGCCTTCCTCTAGCGTTATCTGCTTCATTTAGCGTCAATAATCTTTCTATGCTCTACTTCCAACTTTGGACTAAAATCTAGAAC…	CCTGCAGTACATTTAGATTC	GAATGGCTGTGTGTTCGTAT
IAA17	Auxin-responsive protein IAA17	AAAATATATGCATCAGTTTTCCTTTCTGCACTCAAATGGGAAAGAAAGAGACTCTGGATAACATGCTTAAGTTTTAACATAGTAATTAATGGCCAAAGCATAGCAGTCATGACAGCAAACCAACCATTTACACAAATAGGAACAACATGTAAGACATACAAAAGACGGTCACACTCTTAATATAGATCTTAGATCCCTAGGGAAATTCTTAGTTAACTAATTGAAGTCCATATGAAGCAGCAAGCCTTAGGACATACGAAGATGGTTTCCGACTTTAAACTCCCAAAGCCTTTTGGTTCCGAGGAGAGCCCAGCTATTAAATCTGCTCGCACTGTAATTTTGAAACTTAGTGTGGATTCTTGCTTTTCTCCATGACCCTCGGAGCTAACCCAATTGCAT…	TTGAAGTCCATATGAAGCAG	GATGCAATTGGGTTAGCTCC
APRR5	Two-component Response regulator-like APRR5	CTCTCCGCCGTCCGATCATGACGGAGCCTCCGTCGACGAAGGGAAAGACGCCACGTGTCCCCTCCGTCGCGGTCGCCGCCGATCATCCTCAATCCACTGCCGGACCGCCGGCGTCGCTGATCCGGTGGGAGCGCTTTCTCCCGAGGCGGTCCCTCCGCGTCCTCCTCGTCGAGCACGACGACTCGACGCGCCACGTCGTCGCCGCTCTCCTCCGGAAGTGCAACTATCACGTGGCGGGAGTGGCGGACGGAATGAAGGCGTGGGAGGTGATGACGGAGAGGAGGTACTGCTTCGATCTGGTGCTGACCGAGGTCGCCACGCCGTCCCTCTCCGGGATCGGCCTGCTCACAAGGGTCGTCGCCACCGAGGAGTGCAAGAACATCCCTGTCATCATGATGT…	GTAGTCTTCGTGGAGCCAAT	CATTGGTTTGTGGTCTTCTC
ACT11	Actin11	GATTTGCTGGAGATGATGCTCCCAGAGCTGTCTTCCCAAGTATTGTTGGTCGACCCCGCCACACCGGTGTCATGGTTGGTATGGGACAGAAAGATGCATATGTTGGTGATGAGGCCCAATCCAAGAGAGGTATTCTTACATTGAAATACCCCATTGA	GATTTGCTGGAGATGATGCT	TCAATGGGGTATTTCAATGTAA
