# Supplementary material for: Iris lactea var. chinensis Plant Drought Tolerance Depends on Response of Proline Metabolism, Transcription Factors, Transporters and the ROS Scavenging System
Source: Research Square preprint supplement (doi:10.21203/rs.3.rs-1312283/v1), 2022-02-08
Supplement: Supplementary file 6 [file aad6ed2f06615636525a584f.xlsx]

## Sheet: Table S4
Table S4. Up- and down-regulation DEGs in comparison groups R/CK
Gene_id	Length	CK	T	R	NR description	GO_id	GO_term	KO_id	KO_name	Pathway_id	Pathway_definition	COG_id	COG_Functional Categories	Swiss-Prot_hit-name	Swiss-Prot_description	Pfam_id	Domain	Domain description
TRINITY_DN36180_c0_g1	1184	1.065	0.44	0		------	------	------	------	------	------	------	------	gi|114149941|sp|Q570B4.2|KCS10_ARATH;	RecName: Full=3-ketoacyl-CoA synthase 10; Short=KCS-10; AltName: Full=Protein FIDDLEHEAD; AltName: Full=Very long-chain fatty acid condensing enzyme 10; Short=VLCFA condensing enzyme 10;	------	------	------
TRINITY_DN37068_c0_g1	631	1.255	1.52	18.635	non-specific lipid-transfer protein 8-like [Asparagus officinalis]	GO:0006869;GO:0006869;GO:0016020;GO:0008289;GO:0008289	BP:lipid transport;BP:lipid transport;CC:membrane;MF:lipid binding;MF:lipid binding;	------	------	------	------	------	------	gi|128385|sp|P23802.1|NLTP_ELECO;	RecName: Full=Non-specific lipid-transfer protein; Short=LTP; AltName: Full=Alpha-amylase inhibitor I-2;	PF00234.19;PF14368.3	Tryp_alpha_amyl;LTP_2	Protease inhibitor/seed storage/LTP family;Probable lipid transfer
TRINITY_DN39882_c0_g1	1134	1.27	0.26	0	uncharacterized protein LOC110012599 [Sesamum indicum]	------	------	------	------	------	------	------	------	------	------	PF14111.3	DUF4283	Domain of unknown function
TRINITY_DN40233_c0_g1	736	20.49	7.105	2.565		------	------	------	------	------	------	------	------	------	------	------	------	------
TRINITY_DN41300_c0_g1	512	0.515	16.54	17.915		------	------	------	------	------	------	------	------	------	------	PF07859.10	Abhydrolase_3	alpha/beta hydrolase fold
TRINITY_DN41380_c0_g1	1083	2.03	12.095	15.56	PREDICTED: 50S ribosomal protein L25-like [Phoenix dactylifera]	GO:0006412;GO:0006412;GO:0006412;GO:0005840;GO:0005840;GO:0008097;GO:0003735;GO:0008097;GO:0003735	BP:translation;BP:translation;BP:translation;CC:ribosome;CC:ribosome;MF:5S rRNA binding;MF:structural constituent of ribosome;MF:5S rRNA binding;MF:structural constituent of ribosome;	K02897	RP-L25, rplY	map03010	Ribosome	------	------	gi|166223699|sp|A5CF34.1|RL25_ORITB;	RecName: Full=50S ribosomal protein L25; AltName: Full=General stress protein CTC;	PF14693.3;PF01386.16	Ribosomal_TL5_C;Ribosomal_L25p	Ribosomal protein TL5, C-terminal domain;Ribosomal L25p family
TRINITY_DN41602_c0_g1	550	2.86	6.185	18.22		------	------	------	------	------	------	------	------	------	------	------	------	------
TRINITY_DN41953_c0_g1	581	0.07	0.48	10.905		------	------	------	------	------	------	------	------	------	------	------	------	------
TRINITY_DN42247_c0_g1	600	32.185	5.185	2.835	PREDICTED: uncharacterized protein LOC105053287 [Elaeis guineensis]	------	------	------	------	------	------	------	------	------	------	PF14009.3	DUF4228	Domain of unknown function
TRINITY_DN42516_c7_g2	784	0.545	103.195	25.11	PREDICTED: non-symbiotic hemoglobin 2-like [Musa acuminata subsp. malaccensis]	GO:0020037;GO:0046872;GO:0019825;GO:0005344;GO:0020037;GO:0046872;GO:0019825;GO:0005344;GO:0020037;GO:0019825	MF:heme binding;MF:metal ion binding;MF:oxygen binding;MF:oxygen transporter activity;MF:heme binding;MF:metal ion binding;MF:oxygen binding;MF:oxygen transporter activity;MF:heme binding;MF:oxygen binding;	------	------	------	------	COG1018	C:Energy production and conversion	gi|22001646|sp|Q9FVL0.1|HBL1_MEDSA;	RecName: Full=Non-symbiotic hemoglobin 1; AltName: Full=MEDsa GLB1;	PF00042.19	Globin	Globin
TRINITY_DN42556_c0_g2	1139	0.08	0.21	3.255	PREDICTED: amino acid permease 3-like isoform X1 [Elaeis guineensis]	------	------	------	------	------	------	COG0814	E:Amino acid transport and metabolism	gi|75220731|sp|Q39134.2|AAP3_ARATH;	RecName: Full=Amino acid permease 3; AltName: Full=Amino acid transporter AAP3;	PF01490.15	Aa_trans	Transmembrane amino acid transporter protein
TRINITY_DN42603_c3_g2	665	3.41	2.355	20.29	laccase-3-like [Asparagus officinalis]	GO:0046274;GO:0048046;GO:0005507;GO:0052716	BP:lignin catabolic process;CC:apoplast;MF:copper ion binding;MF:hydroquinon;	K05909	E1.10.3.2	------	------	------	------	gi|122248700|sp|Q2QYS3.1|LAC23_ORYSJ;	RecName: Full=Laccase-23; AltName: Full=Benzenediol:oxygen oxidoreductase 23; AltName: Full=Diphenol oxidase 23; AltName: Full=Urishiol oxidase 23; Flags: Precursor;	PF07731.11	Cu-oxidase_2	Multicopper oxidase
TRINITY_DN42609_c1_g2	1723	3.58	6.84	26.715	hydroxymethylglutaryl coenzyme A synthase [Narcissus tazetta]	GO:0008299;GO:0016126;GO:0008299;GO:0016126;GO:0008299;GO:0016126;GO:0004421;GO:0004421;GO:0004421	BP:isoprenoid biosynthetic process;BP:sterol biosynthetic process;BP:isoprenoid biosynthetic process;BP:sterol biosynthetic process;BP:isoprenoid biosynthetic process;BP:sterol biosynthetic process;MF:hydroxymethylglutaryl-CoA synthase activity;MF:hydroxymethylglutaryl-CoA synthase activity;MF:hydroxymethylglutaryl-CoA synthase activity;	K01641	E2.3.3.10	map00900;map00280;map00072;map00650	Terpenoid backbone biosynthesis;Valine, leucine and isoleucine degradation;Synthesis and degradation of ketone bodies;Butanoate metabolism	COG3425	I:Lipid transport and metabolism	gi|21431772|sp|P54873.2|HMCS_ARATH;	RecName: Full=Hydroxymethylglutaryl-CoA synthase; Short=HMG-CoA synthase; AltName: Full=3-hydroxy-3-methylglutaryl coenzyme A synthase; AltName: Full=Protein EMBRYO DEFECTIVE 2778; AltName: Full=Protein FLAKY POLLEN 1;	PF08540.7;PF01154.14;PF08541.7	HMG_CoA_synt_C;HMG_CoA_synt_N;ACP_syn_III_C	Hydroxymethylglutaryl-coenzyme A synthase C terminal;Hydroxymethylglutaryl-coenzyme A synthase N terminal;3-Oxoacyl-[acyl-carrier-protein
TRINITY_DN42692_c0_g1	490	2.655	14.845	40.79	trans-resveratrol di-O-methyltransferase-like isoform X1 [Asparagus officinalis]	------	------	K16040	ROMT	map00945	Stilbenoid, diarylheptanoid and gingerol biosynthesis	------	------	gi|84029472|sp|Q93WU3.1|CVMT1_OCIBA;	RecName: Full=Chavicol O-methyltransferase; AltName: Full;	PF00891.15	Methyltransf_2	O-methyltransferase
TRINITY_DN42696_c0_g2	1191	1.965	2.135	0.11	putative cysteine protease 1 [Iris x hollandica]	GO:0008234;GO:0008234;GO:0008234;GO:0008234;GO:0008234	MF:cysteine-type peptidase activity;MF:cysteine-type peptidase activity;MF:cysteine-type peptidase activity;MF:cysteine-type peptidase activity;MF:cysteine-type peptidase activity;	K16292	CEP, CYSEP	------	------	------	------	gi|75296543|sp|Q7XWK5.2|SAG39_ORYSJ;	RecName: Full=Senescence-specific cysteine protease SAG39; AltName: Full=Cysteine proteinase SAG39; AltName: Full=Protein SENESCENCE-ASSOCIATED GENE 39; Flags: Precursor;	PF00112.20;PF08246.9;PF03051.12	Peptidase_C1;Inhibitor_I29;Peptidase_C1_2	Papain family cysteine protease;Cathepsin propeptide inhibitor domain;Peptidase C1-like family
TRINITY_DN42747_c0_g1	2866	3.84	0.815	0.12	PREDICTED: uncharacterized protein LOC109220861 [Nicotiana attenuata]	------	------	------	------	------	------	------	------	gi|126296|sp|P08548.1|LIN1_NYCCO;	RecName: Full=LINE-1 reverse transcriptase homolog;	PF00078.24	RVT_1	Reverse transcriptase
TRINITY_DN42795_c3_g1	1301	32.905	0.51	6.815	polygalacturonase inhibitor-like [Asparagus officinalis]	------	------	------	------	------	------	------	------	gi|464367|sp|Q05091.1|PGIP_PYRCO;	RecName: Full=Polygalacturonase inhibitor; AltName: Full=Polygalacturonase-inhibiting protein; Short=PGIG; Flags: Precursor;	PF13855.3;PF08263.9;PF12799.4	LRR_8;LRRNT_2;LRR_4	Leucine rich repeat;Leucine rich repeat N-terminal domain;Leucine Rich repeats
TRINITY_DN42829_c4_g1	1138	1.77	0.095	0		------	------	------	------	------	------	------	------	------	------	------	------	------
TRINITY_DN42834_c5_g5	1183	0.72	2.52	10.825		------	------	------	------	------	------	------	------	------	------	------	------	------
TRINITY_DN42917_c4_g1	2659	0.03	0.1	2.065	PREDICTED: beta-galactosidase 11-like [Musa acuminata subsp. malaccensis]	------	------	------	------	------	------	COG1874	G:Carbohydrate transport and metabolism	gi|75136208|sp|Q6ZJJ0.1|BGA11_ORYSJ;	RecName: Full=Beta-galactosidase 11; AltName: Full=Lactase 115; Flags: Precursor;	PF01301.16;PF02140.15;PF13364.3	Glyco_hydro_35;Gal_Lectin;BetaGal_dom4_5	Glycosyl hydrolases family 35;Galactose binding lectin domain;Beta-galactosidase jelly roll domain
TRINITY_DN43075_c0_g1	2584	0	1.37	1.965	C2 and GRAM domain-containing protein [Apostasia shenzhenica]	GO:0016021;GO:0016021;GO:0016021	CC:integral component of membrane;CC:integral component of membrane;CC:integral component of membrane;	------	------	------	------	------	------	gi|75171409|sp|Q9FL59.1|FTIP1_ARATH;	RecName: Full=FT-interacting protein 1;	PF08372.7;PF00168.27	PRT_C;C2	Plant phosphoribosyltransferase C-terminal;C2 domain
TRINITY_DN43079_c1_g5	1922	0.05	0.085	2.24	PREDICTED: ABC transporter G family member 6-like [Elaeis guineensis]	GO:0016021;GO:0016021;GO:0005524;GO:0016887;GO:0005524;GO:0016887	CC:integral component of membrane;CC:integral component of membrane;MF:ATP binding;MF:ATPase activity;MF:ATP binding;MF:ATPase activity;	------	------	------	------	------	------	gi|75318720|sp|O80946.1|AB1G_ARATH;	RecName: Full=ABC transporter G family member 1; Short=ABC transporter ABCG.1; Short=AtABCG1; AltName: Full=White-brown complex homolog protein 1; Short=AtWBC1;	PF01061.21;PF00005.24;PF13191.3;PF13555.3;PF13481.3	ABC2_membrane;ABC_tran;AAA_16;AAA_29;AAA_25	ABC-2 type transporter;ABC transporter;AAA ATPase domain;P-loop containing region of AAA domain;AAA domain
TRINITY_DN43104_c0_g1	635	3.155	0	0		------	------	------	------	------	------	------	------	------	------	------	------	------
TRINITY_DN43104_c0_g2	1046	1.74	0	0		------	------	------	------	------	------	------	------	------	------	------	------	------
TRINITY_DN43109_c3_g4	1562	2.455	0.06	0.115		------	------	------	------	------	------	------	------	------	------	------	------	------
TRINITY_DN43136_c8_g5	2324	0.125	0.865	1.47	PREDICTED: pentatricopeptide repeat-containing protein At3g04130, mitochondrial [Phoenix dactylifera]	------	------	------	------	------	------	------	------	gi|218546763|sp|Q9M8W9.2|PP211_ARATH;	RecName: Full=Pentatricopeptide repeat-containing protein At3g04130, mitochondrial; Flags: Precursor;	PF13041.3;PF12854.4;PF01535.17;PF13812.3;PF17177.1	PPR_2;PPR_1;PPR;PPR_3;PPR_long	PPR repeat family;PPR repeat;PPR repeat;Pentatricopeptide repeat domain;Pentacotripeptide-repeat region of PROPR
TRINITY_DN43150_c0_g4	1271	0	0.38	1.895	peroxidase 11-like [Asparagus officinalis]	------	------	K00430	E1.11.1.7	map00940	Phenylpropanoid biosynthesis	------	------	gi|25453204|sp|Q96519.1|PER11_ARATH;	RecName: Full=Peroxidase 11; Short=Atperox P11; AltName: Full=ATP23a/ATP23b; Flags: Precursor;	PF00141.20	peroxidase	Peroxidase
TRINITY_DN43178_c9_g1	1153	4.565	8.13	34.29	stress-response A/B barrel domain-containing protein HS1-like [Quercus suber]	------	------	------	------	------	------	------	------	gi|51316534|sp|Q9LUV2.1|POP3_ARATH;	RecName: Full=Stress-response A/B barrel domain-containing protein HS1; AltName: Full=Pop3 family protein At3g17210; AltName: Full=Protein HEAT STABLE 1; Short=AtHS1;	------	------	------
TRINITY_DN43193_c1_g1	1611	0.49	1.35	9.595	LOW QUALITY PROTEIN: omega-hydroxypalmitate O-feruloyl transferase-like [Asparagus officinalis]	GO:0016747;GO:0016747	MF:transferase activity, transferring acyl groups other than amino-acyl groups;MF:transferase activity, transferring acyl groups other than amino-acyl groups;	K15400	HHT1	map00073	Cutin, suberine and wax biosynthesis	------	------	gi|75165230|sp|Q94CD1.1|HHT1_ARATH;	RecName: Full=Omega-hydroxypalmitate O-feruloyl transferase; AltName: Full=Omega-hydroxyacid hydroxycinnamoyltransferase; AltName: Full=Protein ALIPHATIC SUBERIN FERULOYL TRANSFERASE;	PF02458.12	Transferase	Transferase family
TRINITY_DN43246_c2_g1	715	0.05	5.275	4.325	zinc finger MYM-type protein 1-like [Populus trichocarpa]	------	------	------	------	------	------	------	------	gi|74743897|sp|Q5SVZ6.1|ZMYM1_HUMAN;	RecName: Full=Zinc finger MYM-type protein 1;	PF14291.3	DUF4371	Domain of unknown function
TRINITY_DN43296_c2_g1	1590	240.35	129.92	23.615	uncharacterized protein LOC109820110 [Asparagus officinalis]	------	------	------	------	------	------	------	------	------	------	------	------	------
TRINITY_DN43302_c3_g2	1015	0.12	0.795	5.315	PREDICTED: WAT1-related protein At5g07050-like [Phoenix dactylifera]	GO:0016021;GO:0022857	CC:integral component of membrane;MF:transmembrane transporter activity;	------	------	------	------	------	------	gi|75171397|sp|Q9FL41.1|WTR38_ARATH;	RecName: Full=WAT1-related protein At5g07050;	PF00892.17	EamA	EamA-like transporter family
TRINITY_DN43342_c2_g9	1720	0.175	0.98	3.23	PREDICTED: peroxidase 1-like [Phoenix dactylifera]	GO:0042744;GO:0006979;GO:0005576;GO:0020037;GO:0046872;GO:0004601	BP:hydrogen peroxide catabolic process;BP:response to oxidative stress;CC:extracellular region;MF:heme binding;MF:metal ion binding;MF:peroxidase activity;	K00430	E1.11.1.7	map00940	Phenylpropanoid biosynthesis	------	------	gi|25453197|sp|Q43735.1|PER27_ARATH;	RecName: Full=Peroxidase 27; Short=Atperox P27; AltName: Full=ATP12a; AltName: Full=PRXR7; Flags: Precursor;	PF00141.20	peroxidase	Peroxidase
TRINITY_DN43343_c0_g1	1787	12.405	1.945	2.915	probable serine/threonine-protein kinase PBL19 [Asparagus officinalis]	GO:0005524;GO:0004672;GO:0005524;GO:0004672	MF:ATP binding;MF:protein kinase activity;MF:ATP binding;MF:protein kinase activity;	K04733	IRAK4	------	------	COG0515	T:Signal transduction mechanisms	gi|75335460|sp|Q9LTC0.1|Y5707_ARATH;	RecName: Full=Probable receptor-like protein kinase At5g47070;	PF07714.14;PF00069.22	Pkinase_Tyr;Pkinase	Protein tyrosine kinase;Protein kinase domain
TRINITY_DN43350_c0_g1	1672	0	1.22	2.215		------	------	------	------	------	------	------	------	------	------	------	------	------
TRINITY_DN43380_c7_g1	456	1.335	46.705	82.85	type 2 metallothionein-like protein, partial [Hyacinthus orientalis]	GO:0046872;GO:0046872;GO:0046872;GO:0046872	MF:metal ion binding;MF:metal ion binding;MF:metal ion binding;MF:metal ion binding;	------	------	------	------	------	------	gi|3334260|sp|O22319.2|MT2_MUSAC;	RecName: Full=Metallothionein-like protein type 2;	PF01439.15	Metallothio_2	Metallothionein
TRINITY_DN43424_c3_g3	672	13.875	3.47	2.055	protein PIN-LIKES 7-like [Asparagus officinalis]	GO:0055085;GO:0055085;GO:0016021;GO:0016021	BP:transmembrane transport;BP:transmembrane transport;CC:integral component of membrane;CC:integral component of membrane;	K07088	K07088	------	------	------	------	gi|75205686|sp|Q9SHL8.1|PILS5_ARATH;	RecName: Full=Protein PIN-LIKES 5; AltName: Full=Auxin efflux carrier-like protein 5;	PF03547.15	Mem_trans	Membrane transport protein
TRINITY_DN43437_c3_g1	906	0.035	23.485	19.455		------	------	------	------	------	------	------	------	------	------	------	------	------
TRINITY_DN43437_c4_g1	1235	8.805	3.43	1.34		------	------	------	------	------	------	------	------	------	------	------	------	------
TRINITY_DN43447_c3_g3	441	1.15	26.685	14.39	R2R3 MYB transcription factor [Elaeis guineensis]	GO:0003677;GO:0003677;GO:0003677;GO:0003677	MF:DNA binding;MF:DNA binding;MF:DNA binding;MF:DNA binding;	K09422	MYBP	------	------	------	------	gi|75107028|sp|P81393.1|MYB08_ANTMA;	RecName: Full=Myb-related protein 308;	PF00249.28;PF13921.3	Myb_DNA-binding;Myb_DNA-bind_6	Myb-like DNA-binding domain;Myb-like DNA-binding domain
TRINITY_DN43458_c0_g1	872	9.25	0.605	0.17	putative germin-like protein 2-1 [Asparagus officinalis]	------	------	------	------	------	------	------	------	gi|75261355|sp|Q6K5Q0.1|GL21_ORYSJ;	RecName: Full=Putative germin-like protein 2-1; Flags: Precursor;	PF00190.19;PF07883.8	Cupin_1;Cupin_2	Cupin;Cupin domain
TRINITY_DN43476_c0_g1	2273	5.15	1.005	0.525		------	------	------	------	------	------	------	------	------	------	------	------	------
TRINITY_DN43476_c0_g2	1073	4.295	0.66	0.325		------	------	------	------	------	------	------	------	------	------	------	------	------
TRINITY_DN43476_c0_g3	2752	3.625	0.65	0.35	uncharacterized protein A4U43_C01F34780 [Asparagus officinalis]	------	------	------	------	------	------	------	------	gi|75169350|sp|Q9C7N2.1|CAD1_ARATH;	RecName: Full=MACPF domain-containing protein CAD1; AltName: Full=Protein CONSTITUTIVELY ACTIVATED CELL DEATH 1; Short=Protein CAD1;	PF01823.16	MACPF	MAC/Perforin domain
TRINITY_DN43476_c0_g4	1620	4.185	1.11	0.23	uncharacterized protein A4U43_C01F34780 [Asparagus officinalis]	------	------	------	------	------	------	------	------	------	------	------	------	------
TRINITY_DN43482_c6_g2	2329	2.61	0.16	0.235		------	------	------	------	------	------	------	------	------	------	------	------	------
TRINITY_DN43500_c4_g1	1854	0.045	0.625	4.71	PREDICTED: serine/threonine-protein phosphatase 7 long form homolog [Ipomoea nil]	------	------	------	------	------	------	------	------	gi|75174963|sp|Q9LNG5.1|PPP7L_ARATH;	RecName: Full=Serine/threonine-protein phosphatase 7 long form homolog;	PF10536.6	PMD	Plant mobile domain
TRINITY_DN43522_c2_g1	1192	0.19	0.81	3.645	copia-like retroelement pol polyprotein [Arabidopsis thaliana]	GO:0015074;GO:0015074;GO:0015074;GO:0003676;GO:0008270;GO:0003676;GO:0003676;GO:0008270	BP:DNA integration;BP:DNA integration;BP:DNA integration;MF:nucleic acid binding;MF:zinc ion binding;MF:nucleic acid binding;MF:nucleic acid binding;MF:zinc ion binding;	------	------	------	------	------	------	gi|130582|sp|P10978.1|POLX_TOBAC;	RecName: Full=Retrovirus-related Pol polyprotein from transposon TNT 1-94; Includes: RecName: Full=Protease; Includes: RecName: Full=Reverse transcriptase; Includes: RecName: Full=Endonuclease;	------	------	------
TRINITY_DN43522_c2_g2	635	0.13	0.515	6.04		------	------	------	------	------	------	------	------	------	------	------	------	------
TRINITY_DN43523_c4_g1	518	53.1	40.055	3.39	PREDICTED: 17.3 kDa class II heat shock protein-like [Phoenix dactylifera]	------	------	K13993	HSP20	map04141	Protein processing in endoplasmic reticulum	------	------	gi|75279028|sp|O82013.1|HSP21_SOLPE;	RecName: Full=17.3 kDa class II heat shock protein; AltName: Full=Hsp17.3; AltName: Full=Hsp20.2;	PF00011.18	HSP20	Hsp20/alpha crystallin family
TRINITY_DN43555_c1_g3	948	7.835	36.125	63.05	RING-H2 finger protein ATL60-like [Asparagus officinalis]	GO:0016021	CC:integral component of membrane;	------	------	------	------	------	------	gi|68565093|sp|P0C035.1|ATL60_ARATH;	RecName: Full=RING-H2 finger protein ATL60;	PF13639.3;PF17123.2;PF12678.4;PF13923.3;PF00097.22;PF14634.3;PF13445.3;PF13920.3;PF14447.3;PF12861.4;PF14446.3	zf-RING_2;zf-RING_11;zf-rbx1;zf-C3HC4_2;zf-C3HC4;zf-RING_5;zf-RING_UBOX;zf-C3HC4_3;Prok-RING_4;zf-ANAPC11;Prok-RING_1	Ring finger domain;RING-like zinc finger;RING-H2 zinc finger domain;Zinc finger, C3HC4 type;Zinc finger, C3HC4 type;zinc-RING finger domain;RING-type zinc-finger;Zinc finger, C3HC4 type;Prokaryotic RING finger family 4;Anaphase-promoting complex subunit 11 RING-H2 finger;Prokaryotic RING finger family 1
TRINITY_DN43574_c6_g2	531	1.275	2.63	21.64		------	------	------	------	------	------	------	------	------	------	------	------	------
TRINITY_DN43584_c4_g2	1143	697.695	195.39	82.115	invertase [Allium cepa]	GO:0005975;GO:0005975;GO:0005975;GO:0005975;GO:0005975;GO:0016021;GO:0016021;GO:0004553;GO:0004575;GO:0004575;GO:0004575;GO:0004553	BP:carbohydrate metabolic process;BP:carbohydrate metabolic process;BP:carbohydrate metabolic process;BP:carbohydrate metabolic process;BP:carbohydrate metabolic process;CC:integral component of membrane;CC:integral component of membrane;MF:hydrolase activity, hydrolyzing O-glycosyl compounds;MF:sucrose alpha-glucosidase activity;MF:sucrose alpha-glucosidase activity;MF:sucrose alpha-glucosidase …	K01193;K21351	SST;INV, sacA	map00500;map00052	Starch and sucrose metabolism;Galactose metabolism	COG1621	G:Carbohydrate transport and metabolism	gi|1352468|sp|P49175.1|INV1_MAIZE;	RecName: Full=Beta-fructofuranosidase 1; AltName: Full=Invertase 1; AltName: Full=Sucrose 1; Flags: Precursor;	PF00251.17	Glyco_hydro_32N	Glycosyl hydrolases family 32 N-terminal domain
TRINITY_DN43601_c0_g2	914	8.865	0.54	0.81	reverse transcriptase [Corchorus capsularis]	GO:0015074;GO:0015074;GO:0015074;GO:0003676;GO:0003964;GO:0008270;GO:0003676;GO:0008270;GO:0003676;GO:0003964	BP:DNA integration;BP:DNA integration;BP:DNA integration;MF:nucleic acid binding;MF:RNA-directed DNA polymerase activity;MF:zinc ion binding;MF:nucleic acid binding;MF:zinc ion binding;MF:nucleic acid binding;MF:RNA-directed DNA polymerase activity;	------	------	------	------	------	------	gi|134034966|sp|Q99315.3|YG31B_YEAST;	RecName: Full=Transposon Ty3-G Gag-Pol polyprotein; AltName: Full=Gag3-Pol3; AltName: Full=Transposon Ty3-1 TYA-TYB polyprotein; Contains: RecName: Full=Capsid protein; Short=CA; AltName: Full=p24; Contains: RecName: Full=Spacer peptide p3; Contains: RecName: Full=Nucleocapsid protein p11; Short=NC; Contains: RecName: Full=Ty3 protease; Short=PR; AltName: Full=p16; Contains: RecName: Full=Spacer …	PF00665.23	rve	Integrase core domain
TRINITY_DN43610_c2_g1	535	0.38	0.62	20.135	hypothetical protein AQUCO_00600282v1 [Aquilegia coerulea]	------	------	------	------	------	------	------	------	------	------	------	------	------
TRINITY_DN43740_c0_g2	603	77.725	6.17	7.845	protein CCA1-like isoform X2 [Asparagus officinalis]	GO:0006355;GO:0006351;GO:0006355;GO:0006351;GO:0005634;GO:0005634;GO:0003677;GO:0003677	BP:regulation of transcription, DNA-templated;BP:transcription, DNA-templated;BP:regulation of transcription, DNA-templated;BP:transcription, DNA-templated;CC:nucleus;CC:nucleus;MF:DNA binding;MF:DNA binding;	K12133	LHY	map04712	Circadian rhythm - plant	------	------	gi|269969425|sp|Q6R0H1.2|LHY_ARATH;	RecName: Full=Protein LHY; AltName: Full=MYB-related transcription factor LHY; AltName: Full=Protein LATE ELONGATED HYPOCOTYL;	------	------	------
TRINITY_DN43740_c1_g1	774	78.445	11.185	5.935	protein LHY-like isoform X1 [Asparagus officinalis]	------	------	K12133	LHY	map04712	Circadian rhythm - plant	------	------	gi|269969425|sp|Q6R0H1.2|LHY_ARATH;	RecName: Full=Protein LHY; AltName: Full=MYB-related transcription factor LHY; AltName: Full=Protein LATE ELONGATED HYPOCOTYL;	------	------	------
TRINITY_DN43740_c1_g2	764	33.2	6.085	3.36	protein CCA1-like isoform X2 [Asparagus officinalis]	------	------	K12133	LHY	map04712	Circadian rhythm - plant	------	------	gi|75319073|sp|P92973.1|CCA1_ARATH;	RecName: Full=Protein CCA1; AltName: Full=MYB-related transcription factor CCA1; AltName: Full=Protein CIRCADIAN CLOCK ASSOCIATED 1;	------	------	------
TRINITY_DN43759_c0_g4	581	251.36	322.655	3.765	22.0 kDa class IV heat shock protein-like [Asparagus officinalis]	------	------	K13993	HSP20	map04141	Protein processing in endoplasmic reticulum	------	------	gi|232282|sp|P30236.1|HSP41_SOYBN;	RecName: Full=22.0 kDa class IV heat shock protein; Flags: Precursor;	PF00011.18	HSP20	Hsp20/alpha crystallin family
TRINITY_DN43764_c4_g2	1514	24.39	23.335	11.275	PREDICTED: probable carboxylesterase 2 [Phoenix dactylifera]	GO:0008152;GO:0008152;GO:0008152;GO:0016787;GO:0016787;GO:0016787	BP:metabolic process;BP:metabolic process;BP:metabolic process;MF:hydrolase activity;MF:hydrolase activity;MF:hydrolase activity;	------	------	------	------	------	------	gi|75321270|sp|Q5NUF4.1|HIDM_GLYEC;	RecName: Full=2-hydroxyisoflavanone dehydratase; AltName: Full=Carboxylesterase HIDM;	PF07859.10;PF00135.25;PF12740.4	Abhydrolase_3;COesterase;Chlorophyllase2	alpha/beta hydrolase fold;Carboxylesterase family;Chlorophyllase enzyme
TRINITY_DN43764_c4_g5	627	5.67	0	0.12		------	------	------	------	------	------	------	------	------	------	------	------	------
TRINITY_DN43811_c2_g1	384	12.855	7.465	0	putative disease resistance protein RGA4 [Dendrobium catenatum]	GO:0043531;GO:0043531;GO:0043531;GO:0043531	MF:ADP binding;MF:ADP binding;MF:ADP binding;MF:ADP binding;	------	------	------	------	------	------	gi|117949827|sp|Q7XA42.2|RGA1_SOLBU;	RecName: Full=Putative disease resistance protein RGA1; AltName: Full=RGA3-blb;	------	------	------
TRINITY_DN43843_c1_g2	1243	1.43	1.145	8.51	peroxidase 4-like [Asparagus officinalis]	GO:0042744;GO:0006979;GO:0042744;GO:0006979;GO:0005576;GO:0005576;GO:0020037;GO:0046872;GO:0004601;GO:0020037;GO:0046872;GO:0004601	BP:hydrogen peroxide catabolic process;BP:response to oxidative stress;BP:hydrogen peroxide catabolic process;BP:response to oxidative stress;CC:extracellular region;CC:extracellular region;MF:heme binding;MF:metal ion binding;MF:peroxidase activity;MF:heme binding;MF:metal ion binding;MF:peroxidase activity;	K00430	E1.11.1.7	map00940	Phenylpropanoid biosynthesis	------	------	gi|223635590|sp|A7NY33.1|PER4_VITVI;	RecName: Full=Peroxidase 4; Flags: Precursor;	PF00141.20	peroxidase	Peroxidase
TRINITY_DN43846_c7_g5	1601	25.66	3.025	3.94	mitogen-activated protein kinase 5 [Asparagus officinalis]	GO:0005622;GO:0005622;GO:0005622;GO:0005524;GO:0004707;GO:0005524;GO:0004707;GO:0005524;GO:0004707	CC:intracellular;CC:intracellular;CC:intracellular;MF:ATP binding;MF:MAP kinase activity;MF:ATP binding;MF:MAP kinase activity;MF:ATP binding;MF:MAP kinase activity;	K20536	MPK3	map04016	MAPK signaling pathway - plant	------	------	gi|122247193|sp|Q10N20.1|MPK5_ORYSJ;	RecName: Full=Mitogen-activated protein kinase 5; Short=MAP kinase 5; AltName: Full=Benzothiadiazole-induced MAP kinase 1; AltName: Full=MAP kinase 2; AltName: Full=Multiple stress-responsive MAP kinase 2; AltName: Full=OsBIMK1; AltName: Full=OsMAP1; AltName: Full=OsMAPK2; AltName: Full=OsMAPK5; AltName: Full=OsMPK3; AltName: Full=OsMSRMK2 >gi|158513192|sp|A2XFC8.2|MPK5_ORYSI RecName: Full=Mitoge…	PF00069.22;PF07714.14;PF06293.11;PF14531.3	Pkinase;Pkinase_Tyr;Kdo;Kinase-like	Protein kinase domain;Protein tyrosine kinase;Lipopolysaccharide kinase;Kinase-like
TRINITY_DN43872_c4_g5	720	0.42	2.085	6.755		------	------	------	------	------	------	------	------	------	------	------	------	------
TRINITY_DN43878_c2_g1	889	5.06	0.425	0.34		------	------	------	------	------	------	------	------	------	------	------	------	------
TRINITY_DN43904_c1_g2	537	56.515	11.025	5.085	PREDICTED: uncharacterized protein LOC105048747 isoform X2 [Elaeis guineensis]	------	------	------	------	------	------	------	------	gi|75102992|sp|Q5M750.1|VQ4_ARATH;	RecName: Full=VQ motif-containing protein 4; Short=AtVQ4; AltName: Full=MPK3/6-targeted VQ-motif-containing protein 1;	PF05678.11	VQ	VQ motif
TRINITY_DN44007_c6_g2	1578	132.845	7.09	4.6	ABC transporter B family member 4-like isoform X1 [Asparagus officinalis]	GO:0016021;GO:0005524;GO:0042626	CC:integral component of membrane;MF:ATP binding;MF:ATPase activity, coupled to transmembrane movement of substances;	K05658	ABCB1, CD243	map02010	ABC transporters	------	------	gi|374095360|sp|Q9M1Q9.2|AB21B_ARATH;	RecName: Full=ABC transporter B family member 21; Short=ABC transporter ABCB.21; Short=AtABCB21; AltName: Full=Multidrug resistance protein 17; AltName: Full=P-glycoprotein 21;	PF00005.24;PF02463.16	ABC_tran;SMC_N	ABC transporter;RecF/RecN/SMC N terminal domain
TRINITY_DN44010_c0_g1	752	111.635	10.225	7.855	PREDICTED: protein PROTON GRADIENT REGULATION 5, chloroplastic [Prunus mume]	GO:0009773;GO:0009644;GO:0009773;GO:0009644	BP:photosynthetic electron transport in photosystem I;BP:response to high light intensity;BP:photosynthetic electron transport in photosystem I;BP:response to high light intensity;	------	------	------	------	------	------	gi|75206595|sp|Q9SL05.1|PGR5_ARATH;	RecName: Full=Protein PROTON GRADIENT REGULATION 5, chloroplastic; Flags: Precursor;	------	------	------
TRINITY_DN44072_c2_g2	2209	0.09	1.565	1.425	DEAD-box ATP-dependent RNA helicase 52C-like [Asparagus officinalis]	GO:0005524;GO:0004386;GO:0003676;GO:0005524;GO:0004386;GO:0003676;GO:0005524;GO:0004386;GO:0003676;GO:0005524;GO:0004386;GO:0003676	MF:ATP binding;MF:helicase activity;MF:nucleic acid binding;MF:ATP binding;MF:helicase activity;MF:nucleic acid binding;MF:ATP binding;MF:helicase activity;MF:nucleic acid binding;MF:ATP binding;MF:helicase activity;MF:nucleic acid binding;	K11594	DDX3X, bel	------	------	------	------	gi|122206897|sp|Q2R1M8.1|RH52C_ORYSJ;	RecName: Full=DEAD-box ATP-dependent RNA helicase 52C;	PF00270.26;PF00271.28	DEAD;Helicase_C	DEAD/DEAH box helicase;Helicase conserved C-terminal domain
TRINITY_DN44073_c1_g2	643	48.545	12.59	0.115		------	------	------	------	------	------	------	------	------	------	------	------	------
TRINITY_DN44109_c5_g2	648	0	0.11	23.77	PREDICTED: polyol transporter 5-like [Musa acuminata subsp. malaccensis]	GO:0016021;GO:0016021;GO:0022857;GO:0022857	CC:integral component of membrane;CC:integral component of membrane;MF:transmembrane transporter activity;MF:transmembrane transporter activity;	------	------	------	------	------	------	gi|118573108|sp|Q8VZ80.2|PLT5_ARATH;	RecName: Full=Polyol transporter 5; AltName: Full=Protein POLYOL TRANSPORTER 5; Short=AtPLT5; AltName: Full=Sugar-proton symporter PLT5;	PF00083.21	Sugar_tr	Sugar
TRINITY_DN44170_c1_g2	646	0	1.16	2.63	uncharacterized protein LOC109828999 [Asparagus officinalis]	GO:0006357;GO:0006357;GO:0003677;GO:0046983;GO:0003677;GO:0046983	BP:regulation of transcription from RNA polymerase II promoter;BP:regulation of transcription from RNA polymerase II promoter;MF:DNA binding;MF:protein dimerization activity;MF:DNA binding;MF:protein dimerization activity;	------	------	------	------	------	------	------	------	------	------	------
TRINITY_DN44190_c6_g2	1175	0	0.78	3.725		------	------	------	------	------	------	------	------	------	------	------	------	------
TRINITY_DN44234_c3_g2	1594	3.53	7.195	53.58	Transferase [Macleaya cordata]	GO:0016747;GO:0016747;GO:0016747;GO:0016747	MF:transferase activity, transferring acyl groups other than amino-acyl groups;MF:transferase activity, transferring acyl groups other than amino-acyl groups;MF:transferase activity, transferring acyl groups other than amino-acyl groups;MF:transferase activity, transferring acyl groups other than amino-acyl groups;	K19861	BEBT, AMAT	------	------	------	------	gi|75150383|sp|Q8GT20.1|BEBT_TOBAC;	RecName: Full=Benzyl alcohol O-benzoyltransferase; AltName: Full=Benzoyl coenzyme A:benzyl alcohol benzoyl transferase;	PF02458.12	Transferase	Transferase family
TRINITY_DN44265_c6_g1	921	0.895	1.885	9.77		------	------	------	------	------	------	------	------	------	------	------	------	------
TRINITY_DN44269_c9_g2	862	41.37	11.95	9.78	PREDICTED: heat stress transcription factor A-4b-like [Phoenix dactylifera]	GO:0005634;GO:0005634;GO:0005634;GO:0003700;GO:0043565;GO:0003700;GO:0043565;GO:0003700;GO:0043565	CC:nucleus;CC:nucleus;CC:nucleus;MF:transcription factor activity, sequence-specific DNA binding;MF:sequence-specific DNA binding;MF:transcription factor activity, sequence-specific DNA binding;MF:sequence-specific DNA binding;MF:transcription factor activity, sequence-specific DNA binding;MF:sequence-specific DNA binding;	K09419;K09414	HSF1;HSFF	------	------	------	------	gi|75306599|sp|Q94J16.1|HFA4B_ORYSJ;	RecName: Full=Heat stress transcription factor A-4b; AltName: Full=Heat stress transcription factor 4; Short=OsHsf-04; AltName: Full=Heat stress transcription factor 9; Short=rHsf9;	------	------	------
TRINITY_DN44271_c8_g2	716	48.125	6.69	0.575	PREDICTED: uncharacterized protein LOC102702935 [Oryza brachyantha]	------	------	------	------	------	------	------	------	------	------	------	------	------
TRINITY_DN44337_c0_g2	1278	1.84	1.62	16.865	PREDICTED: NDR1/HIN1-like protein 12 [Phoenix dactylifera]	GO:0016021;GO:0016021;GO:0016021	CC:integral component of membrane;CC:integral component of membrane;CC:integral component of membrane;	------	------	------	------	------	------	gi|75313493|sp|Q9SJ54.1|NHL12_ARATH;	RecName: Full=NDR1/HIN1-like protein 12;	PF03168.10	LEA_2	Late embryogenesis abundant protein
TRINITY_DN44338_c5_g1	661	70.335	6.77	0.6		------	------	------	------	------	------	------	------	------	------	------	------	------
TRINITY_DN44378_c9_g4	1156	0	0.14	1.415	retrotransposon polyprotein [Rosa rugosa]	GO:0015074;GO:0003676	BP:DNA integration;MF:nucleic acid binding;	------	------	------	------	------	------	------	------	PF14223.3	Retrotran_gag_2	gag-polypeptide of LTR copia-type
TRINITY_DN44418_c4_g3	1632	93.645	13.06	10.665	PREDICTED: chitin elicitor-binding protein [Phoenix dactylifera]	------	------	------	------	------	------	------	------	gi|38257899|sp|O23006.1|LYM2_ARATH;	RecName: Full=LysM domain-containing GPI-anchored protein 2; AltName: Full=Chitin elicitor-binding protein LYM2; Short=CEBiP LYM2; Flags: Precursor;	PF01476.17	LysM	LysM domain
TRINITY_DN44489_c3_g1	335	0	2.26	18.005		------	------	------	------	------	------	------	------	------	------	------	------	------
TRINITY_DN44491_c3_g2	1001	99.405	0.825	7.11	PREDICTED: probable LRR receptor-like serine/threonine-protein kinase At3g47570 [Elaeis guineensis]	------	------	------	------	------	------	------	------	gi|263419078|sp|C0LGT6.1|EFR_ARATH;	RecName: Full=LRR receptor-like serine/threonine-protein kinase EFR; AltName: Full=Elongation factor Tu receptor; Short=EF-Tu receptor; Flags: Precursor;	PF00069.22;PF07714.14;PF01636.20	Pkinase;Pkinase_Tyr;APH	Protein kinase domain;Protein tyrosine kinase;Phosphotransferase enzyme family
TRINITY_DN44512_c3_g1	922	5.35	5.47	97.635	PREDICTED: 21 kDa protein-like [Phoenix dactylifera]	GO:0004857;GO:0004857	MF:enzyme inhibitor activity;MF:enzyme inhibitor activity;	------	------	------	------	------	------	gi|112717|sp|P17407.1|21KD_DAUCA;	RecName: Full=21 kDa protein; AltName: Full=1.2 protein; Flags: Precursor;	PF04043.12	PMEI	Plant invertase/pectin methylesterase inhibitor
TRINITY_DN44535_c4_g1	613	0.345	2.045	12.245	PREDICTED: uncharacterized protein LOC105041137 isoform X1 [Elaeis guineensis]	GO:0016021;GO:0016757	CC:integral component of membrane;MF:transferase activity, transferring glycosyl groups;	K18207	POMGNT2, GTDC2	map00515	Mannose type O-glycan biosynthesis	------	------	------	------	PF04577.11	DUF563	Protein of unknown function
TRINITY_DN44576_c8_g1	2152	0.065	0.185	1.15		------	------	------	------	------	------	------	------	------	------	------	------	------
TRINITY_DN44598_c5_g5	730	15.105	0.85	1.075	calcium-dependent protein kinase 18 isoform X1 [Asparagus officinalis]	GO:0005524;GO:0005509;GO:0004672	MF:ATP binding;MF:calcium ion binding;MF:protein kinase activity;	------	------	------	------	------	------	gi|75334005|sp|Q9FKW4.1|CDPKS_ARATH;	RecName: Full=Calcium-dependent protein kinase 28;	------	------	------
TRINITY_DN44639_c0_g9	3217	1.92	0.29	0.155	probable protein phosphatase 2C 15 [Asparagus officinalis]	GO:0004722	MF:protein serine/threonine phosphatase activity;	------	------	------	------	------	------	gi|75191032|sp|Q9M9C6.1|P2C15_ARATH;	RecName: Full=Probable protein phosphatase 2C 15; Short=AtPP2C15;	------	------	------
TRINITY_DN44661_c9_g5	708	2.18	0.52	0		------	------	------	------	------	------	------	------	------	------	------	------	------
TRINITY_DN44724_c4_g1	1157	2.425	0.18	0.025		------	------	------	------	------	------	------	------	------	------	------	------	------
TRINITY_DN44727_c3_g7	736	122.755	104.82	19.795		------	------	------	------	------	------	------	------	------	------	------	------	------
TRINITY_DN44743_c0_g2	1065	19.545	7.745	2.185	PREDICTED: peroxisomal 2,4-dienoyl-CoA reductase [Elaeis guineensis]	------	------	K13237	DECR2	map04146	Peroxisome	------	------	gi|66774119|sp|Q9LTV6.1|DECR2_ARATH;	RecName: Full=Peroxisomal 2,4-dienoyl-CoA reductase;	PF13561.3;PF00106.22	adh_short_C2;adh_short	Enoyl;short chain dehydrogenase
TRINITY_DN44766_c3_g1	1228	369.33	469.555	51.715	PREDICTED: BAG family molecular chaperone regulator 6-like [Phoenix dactylifera]	GO:0051087;GO:0051087	MF:chaperone binding;MF:chaperone binding;	------	------	------	------	------	------	------	------	------	------	------
TRINITY_DN44787_c13_g2	606	0.425	3.635	28.725	uncharacterized protein LOC109721137 [Ananas comosus]	------	------	------	------	------	------	------	------	------	------	------	------	------
TRINITY_DN44798_c6_g2	526	0.1	1.705	7.88		------	------	------	------	------	------	------	------	------	------	------	------	------
TRINITY_DN44799_c0_g1	596	3.41	0.32	0	uncharacterized protein LOC110610437 [Manihot esculenta]	------	------	------	------	------	------	------	------	------	------	PF03732.14	Retrotrans_gag	Retrotransposon gag protein
TRINITY_DN44807_c2_g4	794	5.055	0.16	0		------	------	------	------	------	------	------	------	------	------	------	------	------
TRINITY_DN44815_c1_g4	972	16.61	1.27	0		------	------	------	------	------	------	------	------	------	------	------	------	------
TRINITY_DN44824_c0_g3	2309	1.395	0.48	0.17		------	------	------	------	------	------	------	------	------	------	------	------	------
TRINITY_DN44905_c6_g2	564	9.295	6.595	0		------	------	------	------	------	------	------	------	------	------	------	------	------
TRINITY_DN44986_c2_g1	528	0	0	3.885	UPF0481 protein [Apostasia shenzhenica]	GO:0016021;GO:0016021	CC:integral component of membrane;CC:integral component of membrane;	------	------	------	------	------	------	gi|75203068|sp|Q9SD53.1|Y3720_ARATH;	RecName: Full=UPF0481 protein At3g47200;	PF03140.12	DUF247	Plant protein of unknown function
TRINITY_DN45189_c2_g1	1390	0.18	0.125	6.47	mitochondrial uncoupling protein 1-like [Asparagus officinalis]	GO:0006839;GO:0016021;GO:0031966	BP:mitochondrial transport;CC:integral component of membrane;CC:mitochondrial membrane;	K15103	UCP2_3, SLC25A8_9	------	------	------	------	gi|75220127|sp|O81845.1|PUMP1_ARATH;	RecName: Full=Mitochondrial uncoupling protein 1; Short=AtPUMP1;	PF00153.24	Mito_carr	Mitochondrial carrier protein
TRINITY_DN45258_c2_g1	1189	20.605	0.855	0.375	PREDICTED: uncharacterized protein LOC103696925 [Phoenix dactylifera]	GO:0016021;GO:0016021;GO:0016021	CC:integral component of membrane;CC:integral component of membrane;CC:integral component of membrane;	------	------	------	------	------	------	------	------	PF03350.13	UPF0114	Uncharacterized protein family, UPF0114
TRINITY_DN45262_c4_g3	1009	83.33	9.7	10.31	hypothetical protein EUGRSUZ_G03410 [Eucalyptus grandis]	------	------	------	------	------	------	------	------	------	------	PF03107.13;PF07649.9	C1_2;C1_3	C1 domain;C1-like domain
TRINITY_DN45312_c5_g2	1976	1.135	7.225	16.155	PREDICTED: rosmarinate synthase-like [Phoenix dactylifera]	GO:0016747;GO:0016747;GO:0016747	MF:transferase activity, transferring acyl groups other than amino-acyl groups;MF:transferase activity, transferring acyl groups other than amino-acyl groups;MF:transferase activity, transferring acyl groups other than amino-acyl groups;	------	------	------	------	------	------	gi|75105145|sp|Q5H873.1|HLTT_LUPAL;	RecName: Full=13-hydroxylupanine O-tigloyltransferase; AltName: Full;	PF02458.12	Transferase	Transferase family
TRINITY_DN45356_c3_g1	767	0.045	10.055	81.925	PB1 domain containing protein [Trema orientalis]	------	------	------	------	------	------	------	------	------	------	PF00564.21	PB1	PB1 domain
TRINITY_DN45373_c0_g2	684	13.565	0.655	0.37		------	------	------	------	------	------	------	------	------	------	------	------	------
TRINITY_DN45399_c3_g2	707	0.42	2.535	5.455	BnaCnng12820D [Brassica napus]	GO:0006397;GO:0055114;GO:0016021;GO:0005747;GO:0005886;GO:0016021;GO:0016021;GO:0005739;GO:0005886;GO:0016021;GO:0005739;GO:0005886;GO:0016021;GO:0005739;GO:0005886;GO:0016491;GO:0008137;GO:0008137;GO:0008137	BP:mRNA processing;BP:oxidation-reduction process;CC:integral component of membrane;CC:mitochondrial respiratory chain complex I;CC:plasma membrane;CC:integral component of membrane;CC:integral component of membrane;CC:mitochondrion;CC:plasma membrane;CC:integral component of membrane;CC:mitochondrion;CC:plasma membrane;CC:integral component of membrane;CC:mitochondrion;CC:plasma membrane;MF:oxid…	K03878	ND1	map00190	Oxidative phosphorylation	------	------	gi|400637|sp|P31839.1|NU1M_OENBE;	RecName: Full=NADH-ubiquinone oxidoreductase chain 1; AltName: Full=NADH dehydrogenase subunit 1;	------	------	------
TRINITY_DN45483_c3_g3	1265	7.295	0.06	0.27	uncharacterized protein A4U43_C05F3570 [Asparagus officinalis]	------	------	K03283	HSPA1_8	map04144;map04141;map03040	Endocytosis;Protein processing in endoplasmic reticulum;Spliceosome	------	------	gi|123620|sp|P27322.1|HSP72_SOLLC;	RecName: Full=Heat shock cognate 70 kDa protein 2;	PF10712.6	NAD-GH	NAD-specific glutamate dehydrogenase
TRINITY_DN45483_c3_g8	497	20.365	4.11	0.585	probable mediator of RNA polymerase II transcription subunit 37c [Sorghum bicolor]	GO:0005524;GO:0005524;GO:0005524;GO:0005524	MF:ATP binding;MF:ATP binding;MF:ATP binding;MF:ATP binding;	K03283	HSPA1_8	map04144;map04141;map03040	Endocytosis;Protein processing in endoplasmic reticulum;Spliceosome	------	------	gi|123650|sp|P09189.1|HSP7C_PETHY;	RecName: Full=Heat shock cognate 70 kDa protein;	PF00012.17;PF06723.10;PF10712.6	HSP70;MreB_Mbl;NAD-GH	Hsp70 protein;MreB/Mbl protein;NAD-specific glutamate dehydrogenase
TRINITY_DN45620_c3_g3	1402	107.305	35.685	13.725	heavy metal-associated isoprenylated plant protein 3-like [Asparagus officinalis]	GO:0030001;GO:0030001;GO:0046872;GO:0046872	BP:metal ion transport;BP:metal ion transport;MF:metal ion binding;MF:metal ion binding;	------	------	------	------	------	------	gi|75262551|sp|Q9FJH5.1|HIP3_ARATH;	RecName: Full=Heavy metal-associated isoprenylated plant protein 3; Short=AtHIPP3; Flags: Precursor;	PF00403.23	HMA	Heavy-metal-associated domain
TRINITY_DN45647_c3_g1	998	0.175	6.335	11.675		------	------	------	------	------	------	------	------	------	------	------	------	------
TRINITY_DN45666_c6_g1	1313	3.365	10.735	16.27	Ubiquitin, partial [Trema orientalis]	------	------	K08770	UBC	------	------	------	------	gi|302393780|sp|P69309.2|UBIQP_AVEFA;	RecName: Full=Polyubiquitin; Contains: RecName: Full=Ubiquitin; Flags: Precursor;	PF00240.20;PF11976.5;PF14560.3	ubiquitin;Rad60-SLD;Ubiquitin_2	Ubiquitin family;Ubiquitin-2 like Rad60 SUMO-like;Ubiquitin-like domain
TRINITY_DN45675_c5_g7	1090	0	3.175	7.9		------	------	------	------	------	------	------	------	------	------	------	------	------
TRINITY_DN45680_c5_g1	1000	2.695	51.255	40.535		------	------	------	------	------	------	------	------	------	------	------	------	------
TRINITY_DN45680_c7_g2	1091	2.39	0.1	0	PREDICTED: uncharacterized protein LOC109217568 [Nicotiana attenuata]	GO:0015074;GO:0015074;GO:0003676;GO:0008270;GO:0016787;GO:0003676	BP:DNA integration;BP:DNA integration;MF:nucleic acid binding;MF:zinc ion binding;MF:hydrolase activity;MF:nucleic acid binding;	K05674;K20477	RGP1;ABCC10	map02010	ABC transporters	------	------	gi|130582|sp|P10978.1|POLX_TOBAC;	RecName: Full=Retrovirus-related Pol polyprotein from transposon TNT 1-94; Includes: RecName: Full=Protease; Includes: RecName: Full=Reverse transcriptase; Includes: RecName: Full=Endonuclease;	------	------	------
TRINITY_DN45690_c1_g1	1648	128.05	78.89	26.92	probable mediator of RNA polymerase II transcription subunit 37c [Chenopodium quinoa]	GO:0005524;GO:0005524	MF:ATP binding;MF:ATP binding;	K03283	HSPA1_8	map04144;map04141;map03040	Endocytosis;Protein processing in endoplasmic reticulum;Spliceosome	COG0443	O:Posttranslational modification, protein turnover, chaperones	gi|75311168|sp|Q9LHA8.1|MD37C_ARATH;	RecName: Full=Probable mediator of RNA polymerase II transcription subunit 37c; AltName: Full=Heat shock 70 kDa protein 4; AltName: Full=Heat shock cognate 70 kDa protein 4; AltName: Full=Heat shock cognate protein 70-4; Short=AtHsc70-4; AltName: Full=Heat shock protein 70-4; Short=AtHsp70-4;	PF00012.17	HSP70	Hsp70 protein
TRINITY_DN45690_c1_g2	515	55.28	13.7	2.31	heat shock cognate 70 kDa protein 2-like [Quercus suber]	------	------	K03283	HSPA1_8	map04144;map04141;map03040	Endocytosis;Protein processing in endoplasmic reticulum;Spliceosome	------	------	gi|123620|sp|P27322.1|HSP72_SOLLC;	RecName: Full=Heat shock cognate 70 kDa protein 2;	PF00012.17;PF10712.6	HSP70;NAD-GH	Hsp70 protein;NAD-specific glutamate dehydrogenase
TRINITY_DN45705_c2_g1	870	0	4.37	2.09		------	------	------	------	------	------	------	------	------	------	------	------	------
TRINITY_DN45707_c8_g1	2306	35.115	2.12	0.6	Protein plant cadmium resistance 8 [Apostasia shenzhenica]	GO:0016021;GO:0016021	CC:integral component of membrane;CC:integral component of membrane;	------	------	------	------	------	------	gi|75186213|sp|Q9M815.2|PCR8_ARATH;	RecName: Full=Protein PLANT CADMIUM RESISTANCE 8; Short=AtPCR8;	PF04749.14	PLAC8	PLAC8 family
TRINITY_DN45721_c2_g2	664	197.295	86.61	43.165	Leucine-rich repeat extensin-like protein 4 [Apostasia shenzhenica]	GO:0016740;GO:0016740	MF:transferase activity;MF:transferase activity;	------	------	------	------	------	------	gi|75334999|sp|Q9LHF1.1|LRX4_ARATH;	RecName: Full=Leucine-rich repeat extensin-like protein 4; Short=AtLRX4; Short=LRR/EXTENSIN4; AltName: Full=Cell wall hydroxyproline-rich glycoprotein; Flags: Precursor;	------	------	------
TRINITY_DN45728_c7_g1	1075	0.285	0.22	6.515		------	------	------	------	------	------	------	------	------	------	------	------	------
TRINITY_DN45745_c0_g1	589	1.1	0.2	14.615		------	------	------	------	------	------	------	------	------	------	------	------	------
TRINITY_DN45748_c0_g4	2490	0	0.28	1.79	cucumisin-like [Asparagus officinalis]	------	------	------	------	------	------	------	------	gi|71153243|sp|Q39547.1|CUCM1_CUCME;	RecName: Full=Cucumisin; AltName: Allergen=Cuc m 1; Flags: Precursor;	PF00082.19;PF05922.13	Peptidase_S8;Inhibitor_I9	Subtilase family;Peptidase inhibitor I9
TRINITY_DN45789_c0_g8	969	5.17	1.82	0		------	------	------	------	------	------	------	------	------	------	------	------	------
TRINITY_DN45870_c6_g2	656	0.585	1.02	15.67		------	------	------	------	------	------	------	------	------	------	------	------	------
TRINITY_DN45878_c2_g2	641	0.44	0.17	8.335		------	------	------	------	------	------	------	------	------	------	------	------	------
TRINITY_DN45878_c2_g8	726	0	0.495	7.69	PREDICTED: receptor-like serine/threonine-protein kinase SD1-8 isoform X2 [Elaeis guineensis]	------	------	------	------	------	------	------	------	gi|363548529|sp|O81832.4|Y4729_ARATH;	RecName: Full=G-type lectin S-receptor-like serine/threonine-protein kinase At4g27290; Flags: Precursor;	PF08276.8	PAN_2	PAN-like domain
TRINITY_DN45900_c0_g2	1168	61.63	11.81	5.94	PREDICTED: uncharacterized protein LOC105038627 [Elaeis guineensis]	------	------	------	------	------	------	------	------	------	------	------	------	------
TRINITY_DN45975_c2_g1	1455	0.29	0.48	5.74	GDSL esterase/lipase At5g37690 [Asparagus officinalis]	GO:0016788	MF:hydrolase activity, acting on ester bonds;	------	------	------	------	COG3240	I:Lipid transport and metabolism	gi|75170657|sp|Q9FHQ1.1|GDL80_ARATH;	RecName: Full=GDSL esterase/lipase At5g37690; AltName: Full=Extracellular lipase At5g37690; Flags: Precursor;	PF00657.19	Lipase_GDSL	GDSL-like Lipase/Acylhydrolase
TRINITY_DN45983_c4_g3	721	83.485	27.135	943.66		------	------	------	------	------	------	------	------	------	------	PF02496.13	ABA_WDS	ABA/WDS induced protein
TRINITY_DN46012_c4_g5	396	273.55	16.52	13.46	PREDICTED: calcium-dependent protein kinase 28-like [Nelumbo nucifera]	GO:0009738;GO:0035556;GO:0018105;GO:0046777;GO:0005737;GO:0005634;GO:0005886;GO:0005524;GO:0005509;GO:0004672;GO:0005524;GO:0005509;GO:0004672;GO:0005524;GO:0005509;GO:0009931;GO:0005516;GO:0004683	BP:abscisic acid-activated signaling pathway;BP:intracellular signal transduction;BP:peptidyl-serine phosphorylation;BP:protein autophosphorylation;CC:cytoplasm;CC:nucleus;CC:plasma membrane;MF:ATP binding;MF:calcium ion binding;MF:protein kinase activity;MF:ATP binding;MF:calcium ion binding;MF:protein kinase activity;MF:ATP binding;MF:calcium ion binding;MF:calcium-dependent protein serine/thre…	K13412	CPK	map04626	Plant-pathogen interaction	------	------	gi|75334005|sp|Q9FKW4.1|CDPKS_ARATH;	RecName: Full=Calcium-dependent protein kinase 28;	PF00036.29;PF13202.3;PF13499.3;PF13405.3;PF13833.3	EF-hand_1;EF-hand_5;EF-hand_7;EF-hand_6;EF-hand_8	EF hand;EF hand;EF-hand domain pair;EF-hand domain;EF-hand domain pair
TRINITY_DN46065_c2_g1	733	11.055	0.64	0.28	PREDICTED: purple acid phosphatase 15-like [Elaeis guineensis]	GO:0016021;GO:0003993;GO:0046872;GO:0003993;GO:0046872;GO:0003993;GO:0046872	CC:integral component of membrane;MF:acid phosphatase activity;MF:metal ion binding;MF:acid phosphatase activity;MF:metal ion binding;MF:acid phosphatase activity;MF:metal ion binding;	------	------	------	------	------	------	gi|75265794|sp|Q9SFU3.1|PPA15_ARATH;	RecName: Full=Purple acid phosphatase 15; AltName: Full=Phytase; Flags: Precursor;	PF16656.2	Pur_ac_phosph_N	Purple acid Phosphatase, N-terminal domain
TRINITY_DN46065_c2_g3	1122	14.125	1.15	0.72	PREDICTED: purple acid phosphatase 15-like [Phoenix dactylifera]	GO:0003993;GO:0046872;GO:0003993;GO:0046872;GO:0003993;GO:0046872;GO:0003993;GO:0046872	MF:acid phosphatase activity;MF:metal ion binding;MF:acid phosphatase activity;MF:metal ion binding;MF:acid phosphatase activity;MF:metal ion binding;MF:acid phosphatase activity;MF:metal ion binding;	------	------	------	------	COG1409	R:General function prediction only	gi|75265794|sp|Q9SFU3.1|PPA15_ARATH;	RecName: Full=Purple acid phosphatase 15; AltName: Full=Phytase; Flags: Precursor;	PF00149.25;PF14008.3	Metallophos;Metallophos_C	Calcineurin-like phosphoesterase;Iron/zinc purple acid phosphatase-like protein C
TRINITY_DN46104_c1_g6	1025	860.935	214.225	114.455	PREDICTED: glucan endo-1,3-beta-glucosidase [Phoenix dactylifera]	GO:0005975;GO:0005975;GO:0005975;GO:0004553;GO:0004553;GO:0004553;GO:0004673	BP:carbohydrate metabolic process;BP:carbohydrate metabolic process;BP:carbohydrate metabolic process;MF:hydrolase activity, hydrolyzing O-glycosyl compounds;MF:hydrolase activity, hydrolyzing O-glycosyl compounds;MF:hydrolase activity, hydrolyzing O-glycosyl compounds;MF:protein histidine kinase activity;	------	------	------	------	------	------	gi|1706551|sp|P52409.1|E13B_WHEAT;	RecName: Full=Glucan endo-1,3-beta-glucosidase; AltName: Full;	PF00332.15	Glyco_hydro_17	Glycosyl hydrolases family 17
TRINITY_DN46108_c0_g3	518	39.945	2.97	1.325	hypothetical protein OsJ_16821 [Oryza sativa Japonica Group]	GO:0005524;GO:0005524;GO:0005524	MF:ATP binding;MF:ATP binding;MF:ATP binding;	K10355	ACTF	------	------	------	------	gi|1703108|sp|P53492.1|ACT7_ARATH;	RecName: Full=Actin-7; AltName: Full=Actin-2;	PF00022.16	Actin	Actin
TRINITY_DN46145_c3_g2	1157	1.025	0.71	0		------	------	------	------	------	------	------	------	------	------	------	------	------
TRINITY_DN46146_c4_g7	1029	0	0.08	12.035	PREDICTED: receptor-like serine/threonine-protein kinase SD1-8 isoform X3 [Elaeis guineensis]	------	------	------	------	------	------	------	------	gi|75311550|sp|Q9LT75.1|PTN2A_ARATH;	RecName: Full=Phosphatidylinositol 3,4,5-trisphosphate 3-phosphatase and protein-tyrosine-phosphatase PTEN2A; AltName: Full=Protein PHOSPHATASE AND TENSIN HOMOLOG 2-a; Short=AtPTEN2; Short=AtPTEN2a;	PF08276.8	PAN_2	PAN-like domain
TRINITY_DN46161_c3_g1	509	0	0.365	4.76	hypothetical protein A4A49_18529 [Nicotiana attenuata]	------	------	------	------	------	------	------	------	------	------	------	------	------
TRINITY_DN46201_c15_g1	798	47.445	1.05	1.97	PREDICTED: ethylene-responsive transcription factor 1B-like [Phoenix dactylifera]	GO:0006351;GO:0006351;GO:0006351;GO:0006351;GO:0005634;GO:0005634;GO:0005634;GO:0005634;GO:0003677;GO:0003700;GO:0003677;GO:0003700;GO:0003677;GO:0003700;GO:0003677;GO:0003700	BP:transcription, DNA-templated;BP:transcription, DNA-templated;BP:transcription, DNA-templated;BP:transcription, DNA-templated;CC:nucleus;CC:nucleus;CC:nucleus;CC:nucleus;MF:DNA binding;MF:transcription factor activity, sequence-specific DNA binding;MF:DNA binding;MF:transcription factor activity, sequence-specific DNA binding;MF:DNA binding;MF:transcription factor activity, sequence-specific DN…	K14516	ERF1	map04016;map04075	MAPK signaling pathway - plant;Plant hormone signal transduction	------	------	gi|57012702|sp|Q8LDC8.2|ERF92_ARATH;	RecName: Full=Ethylene-responsive transcription factor 1B; Short=AtERF1B; AltName: Full=Ethylene-responsive element-binding factor 1B; Short=EREBP-1B;	PF00847.17	AP2	AP2 domain
TRINITY_DN46234_c4_g3	2953	0.19	0.935	2.47	pentatricopeptide repeat-containing protein At3g23020 [Asparagus officinalis]	GO:0008168	MF:methyltransferase activity;	------	------	------	------	------	------	gi|75273922|sp|Q9LS88.1|PP250_ARATH;	RecName: Full=Pentatricopeptide repeat-containing protein At3g23020;	PF13041.3;PF01535.17;PF12854.4;PF13812.3;PF17177.1;PF00637.17	PPR_2;PPR;PPR_1;PPR_3;PPR_long;Clathrin	PPR repeat family;PPR repeat;PPR repeat;Pentatricopeptide repeat domain;Pentacotripeptide-repeat region of PROPR;Region in Clathrin and VPS
TRINITY_DN46298_c1_g4	1053	212.28	34.86	37.915	uncharacterized protein A4U43_C07F23720 [Asparagus officinalis]	GO:0048046;GO:0048046	CC:apoplast;CC:apoplast;	------	------	------	------	------	------	------	------	PF03018.11	Dirigent	Dirigent-like protein
TRINITY_DN46336_c0_g1	2047	7.45	40.505	38.89	uncharacterized protein LOC109849767 [Asparagus officinalis]	------	------	------	------	------	------	------	------	------	------	------	------	------
TRINITY_DN46336_c0_g3	3681	3.01	9.245	11.535	uncharacterized protein LOC109849767 [Asparagus officinalis]	------	------	------	------	------	------	------	------	------	------	------	------	------
TRINITY_DN46347_c7_g1	398	8.615	0	0		------	------	------	------	------	------	------	------	------	------	------	------	------
TRINITY_DN46349_c1_g1	2623	1.865	0.845	0.23	calmodulin [Durio zibethinus]	GO:0005509;GO:0005509	MF:calcium ion binding;MF:calcium ion binding;	K02183	CALM	map04070;map04016;map04626	Phosphatidylinositol signaling system;MAPK signaling pathway - plant;Plant-pathogen interaction	------	------	gi|115513|sp|P27161.2|CALM_SOLLC;	RecName: Full=Calmodulin; Short=CaM;	------	------	------
TRINITY_DN46436_c4_g1	829	0	0	1.74		------	------	------	------	------	------	------	------	------	------	------	------	------
TRINITY_DN46469_c5_g2	774	15.065	1.23	0.555		------	------	------	------	------	------	------	------	------	------	------	------	------
TRINITY_DN46485_c1_g1	421	157.23	3.645	8.995	Ca2+/calmodulin-dependent protein kinase, EF-Hand protein superfamily [Handroanthus impetiginosus]	GO:0005524;GO:0005509;GO:0004672;GO:0005524;GO:0005509;GO:0004672;GO:0005524;GO:0005509;GO:0004672;GO:0005524;GO:0005509;GO:0004672	MF:ATP binding;MF:calcium ion binding;MF:protein kinase activity;MF:ATP binding;MF:calcium ion binding;MF:protein kinase activity;MF:ATP binding;MF:calcium ion binding;MF:protein kinase activity;MF:ATP binding;MF:calcium ion binding;MF:protein kinase activity;	K13412	CPK	map04626	Plant-pathogen interaction	------	------	gi|75327228|sp|Q7XJR9.1|CDPKG_ARATH;	RecName: Full=Calcium-dependent protein kinase 16;	PF00069.22	Pkinase	Protein kinase domain
TRINITY_DN46504_c5_g1	692	0.135	5.245	65.83	PREDICTED: probable metal-nicotianamine transporter YSL12 isoform X1 [Phoenix dactylifera]	GO:0055085;GO:0055085;GO:0016021;GO:0016021	BP:transmembrane transport;BP:transmembrane transport;CC:integral component of membrane;CC:integral component of membrane;	------	------	------	------	------	------	gi|224493430|sp|Q0J932.2|YSL10_ORYSJ;	RecName: Full=Probable metal-nicotianamine transporter YSL10; AltName: Full=Protein YELLOW STRIPE LIKE 10; Short=OsYSL10;	PF03169.12	OPT	OPT oligopeptide transporter protein
TRINITY_DN46506_c7_g1	2084	111.53	15.865	7.48	PREDICTED: protein NRT1/ PTR FAMILY 6.4 [Phoenix dactylifera]	GO:0016021;GO:0016021;GO:0022857;GO:0022857	CC:integral component of membrane;CC:integral component of membrane;MF:transmembrane transporter activity;MF:transmembrane transporter activity;	------	------	------	------	------	------	gi|75274347|sp|Q9LVE0.1|PTR33_ARATH;	RecName: Full=Protein NRT1/ PTR FAMILY 6.4; Short=AtNPF6.4; AltName: Full=Nitrate transporter 1.3;	PF00854.18;PF07690.13	PTR2;MFS_1	POT family;Major Facilitator Superfamily
TRINITY_DN46512_c4_g1	1080	12.105	13.65	87.165	methylesterase 17 isoform X1 [Phalaenopsis equestris]	------	------	------	------	------	------	------	------	gi|75337194|sp|Q9SG92.1|MES17_ARATH;	RecName: Full=Methylesterase 17; Short=AtMES17; AltName: Full=Methyl indole-3-acetic acid esterase;	PF00561.17;PF12697.4;PF12146.5	Abhydrolase_1;Abhydrolase_6;Hydrolase_4	alpha/beta hydrolase fold;Alpha/beta hydrolase family;Serine aminopeptidase, S33
TRINITY_DN46533_c5_g1	1268	3.79	0.97	0.63		------	------	------	------	------	------	------	------	------	------	------	------	------
TRINITY_DN46553_c7_g1	2224	3.08	0.09	0.065		------	------	------	------	------	------	------	------	------	------	------	------	------
TRINITY_DN46586_c3_g2	1507	5.97	0.295	0.585	UDP-glycosyltransferase 91C1-like [Asparagus officinalis]	GO:0008152;GO:0016758	BP:metabolic process;MF:transferase activity, transferring hexosyl groups;	------	------	------	------	------	------	gi|75264223|sp|Q9LTA3.1|U91C1_ARATH;	RecName: Full=UDP-glycosyltransferase 91C1;	PF00201.15	UDPGT	UDP-glucoronosyl and UDP-glucosyl transferase
TRINITY_DN46596_c1_g6	749	0	0.91	6.44		------	------	------	------	------	------	------	------	------	------	------	------	------
TRINITY_DN46610_c2_g2	654	1.74	2.225	11.355		------	------	------	------	------	------	------	------	------	------	------	------	------
TRINITY_DN46623_c1_g2	515	48.985	1.145	3.705	12-oxophytodienoate reductase 1 [Lilium regale]	GO:0010181;GO:0016491;GO:0010181;GO:0016491	MF:FMN binding;MF:oxidoreductase activity;MF:FMN binding;MF:oxidoreductase activity;	K05894	OPR	map00592	alpha-Linolenic acid metabolism	COG1902	C:Energy production and conversion	gi|338818374|sp|B9FSC8.1|OPR11_ORYSJ;	RecName: Full=Putative 12-oxophytodienoate reductase 11; AltName: Full=OPDA-reductase 11; Short=OsOPR11;	PF00724.17	Oxidored_FMN	NAD
TRINITY_DN46645_c4_g1	1919	0	3.015	2.485		------	------	------	------	------	------	------	------	------	------	------	------	------
TRINITY_DN46661_c3_g1	1470	3.715	0.265	0.275		------	------	------	------	------	------	------	------	------	------	------	------	------
TRINITY_DN46704_c1_g4	1450	0.02	0.435	3.125	uncharacterized protein LOC110661296 [Hevea brasiliensis]	------	------	------	------	------	------	------	------	------	------	------	------	------
TRINITY_DN46747_c3_g2	1516	0	0.505	0.945	hydroxycinnamoyltransferase [Narcissus pseudonarcissus]	GO:0016747;GO:0047172;GO:0016747	MF:transferase activity, transferring acyl groups other than amino-acyl groups;MF:shikimate O-hydroxycinnamoyltransferase activity;MF:transferase activity, transferring acyl groups other than amino-acyl groups;	K13065	E2.3.1.133, HCT	map00941;map00940;map00945	Flavonoid biosynthesis;Phenylpropanoid biosynthesis;Stilbenoid, diarylheptanoid and gingerol biosynthesis	------	------	gi|75150330|sp|Q8GSM7.1|HST_TOBAC;	RecName: Full=Shikimate O-hydroxycinnamoyltransferase; AltName: Full=Hydroxycinnamoyl transferase; AltName: Full=Hydroxycinnamoyl-Coenzyme A shikimate/quinate hydroxycinnamoyltransferase;	PF02458.12	Transferase	Transferase family
TRINITY_DN46760_c0_g3	2402	5.74	0.565	0		------	------	------	------	------	------	------	------	------	------	------	------	------
TRINITY_DN46800_c4_g1	544	1.75	4.745	18.525	uncharacterized protein A4U43_C03F8190 [Asparagus officinalis]	GO:0035556;GO:0005622	BP:intracellular signal transduction;CC:intracellular;	------	------	------	------	------	------	gi|75327653|sp|Q7Y0E8.1|NRX11_ORYSJ;	RecName: Full=Probable nucleoredoxin 1-1; Short=OsNrx1-1;	PF03107.13;PF07649.9;PF00130.19;PF00569.14	C1_2;C1_3;C1_1;ZZ	C1 domain;C1-like domain;Phorbol esters/diacylglycerol binding domain;Zinc finger, ZZ type
TRINITY_DN46831_c4_g1	916	4.44	30.06	84.335	uncharacterized J domain-containing protein C3E7.11c-like isoform X2 [Asparagus officinalis]	------	------	------	------	------	------	------	------	gi|21759482|sp|P00210.3|FER1_DESAF;	RecName: Full=Ferredoxin-1; AltName: Full=Ferredoxin I; Short=FdI;	PF13370.3;PF13459.3;PF00037.24	Fer4_13;Fer4_15;Fer4	4Fe-4S single cluster domain of Ferredoxin I;4Fe-4S single cluster domain;4Fe-4S binding domain
TRINITY_DN46853_c1_g3	412	0.715	8.815	16.24	zinc finger protein 8-like [Dendrobium catenatum]	GO:0003676;GO:0003676	MF:nucleic acid binding;MF:nucleic acid binding;	------	------	------	------	------	------	gi|75319138|sp|P93751.1|ZFP8_ARATH;	RecName: Full=Zinc finger protein 8;	PF13912.3;PF13894.3	zf-C2H2_6;zf-C2H2_4	C2H2-type zinc finger;C2H2-type zinc finger
TRINITY_DN46869_c5_g3	2193	2.08	0.08	0.14		------	------	------	------	------	------	------	------	------	------	------	------	------
TRINITY_DN46897_c0_g2	3152	0.84	1.65	5.955	PREDICTED: LOW QUALITY PROTEIN: monothiol glutaredoxin-S11-like [Phoenix dactylifera]	GO:0045454;GO:0005623;GO:0009055;GO:0015035	BP:cell redox homeostasis;CC:cell;MF:electron carrier activity;MF:protein disulfide oxidoreductase activity;	------	------	------	------	------	------	gi|75338820|sp|Q9ZPH2.1|GRS17_ARATH;	RecName: Full=Monothiol glutaredoxin-S17; Short=AtGrxS17;	PF00085.17	Thioredoxin	Thioredoxin
TRINITY_DN46933_c4_g2	1974	3.38	2.945	18.99		------	------	------	------	------	------	------	------	------	------	------	------	------
TRINITY_DN46998_c4_g4	888	0	0.395	2.11		------	------	------	------	------	------	------	------	------	------	------	------	------
TRINITY_DN47019_c1_g1	619	3.865	19.98	56.295	PREDICTED: LOW QUALITY PROTEIN: uncharacterized protein LOC109505724 [Elaeis guineensis]	------	------	------	------	------	------	------	------	------	------	------	------	------
TRINITY_DN47031_c7_g1	782	0	3.19	5.13	PREDICTED: auxin response factor 23-like isoform X2 [Phoenix dactylifera]	GO:0009734;GO:0006355;GO:0006351;GO:0009734;GO:0006355;GO:0006351;GO:0009734;GO:0006355;GO:0006351;GO:0009734;GO:0006355;GO:0006351;GO:0005634;GO:0005634;GO:0005634;GO:0005634;GO:0003677;GO:0003677;GO:0003677;GO:0003677	BP:auxin-activated signaling pathway;BP:regulation of transcription, DNA-templated;BP:transcription, DNA-templated;BP:auxin-activated signaling pathway;BP:regulation of transcription, DNA-templated;BP:transcription, DNA-templated;BP:auxin-activated signaling pathway;BP:regulation of transcription, DNA-templated;BP:transcription, DNA-templated;BP:auxin-activated signaling pathway;BP:regulation of …	------	------	------	------	------	------	gi|122207373|sp|Q2R3F5.2|ARFW_ORYSJ;	RecName: Full=Auxin response factor 23; AltName: Full=OsARF1;	------	------	------
TRINITY_DN47037_c1_g1	979	14.19	13.62	130.32	PREDICTED: geraniol 8-hydroxylase-like [Elaeis guineensis]	------	------	------	------	------	------	------	------	gi|584998|sp|P37120.1|C75A2_SOLME;	RecName: Full=Flavonoid 3',5'-hydroxylase; Short=F3'5'H; AltName: Full=CYPLXXVA2; AltName: Full=Cytochrome P450 75A2; AltName: Full=P-450EG1 [Solanum melongena];	PF00067.19	p450	Cytochrome P450
TRINITY_DN47093_c2_g1	1910	9.895	1.995	1.075	PREDICTED: protein LNK1-like isoform X2 [Elaeis guineensis]	------	------	------	------	------	------	------	------	gi|1018737538|sp|A8MQN2.1|LNK1_ARATH;	RecName: Full=Protein LNK1; AltName: Full=Night light-inducible and clock-regulated 1;	------	------	------
TRINITY_DN47118_c1_g3	735	11.06	3.425	0.37	PREDICTED: stromal 70 kDa heat shock-related protein, chloroplastic-like [Musa acuminata subsp. malaccensis]	GO:0005524	MF:ATP binding;	K03283	HSPA1_8	map04144;map04141;map03040	Endocytosis;Protein processing in endoplasmic reticulum;Spliceosome	------	------	gi|399942|sp|Q02028.1|HSP7S_PEA;	RecName: Full=Stromal 70 kDa heat shock-related protein, chloroplastic; Flags: Precursor;	PF00012.17	HSP70	Hsp70 protein
TRINITY_DN47135_c0_g1	1879	0	2.64	1.865	Reverse transcriptase zinc-binding domain [Macleaya cordata]	GO:0003676;GO:0003964;GO:0003676;GO:0003964;GO:0003676;GO:0003964;GO:0003676;GO:0003964;GO:0003676;GO:0003964	MF:nucleic acid binding;MF:RNA-directed DNA polymerase activity;MF:nucleic acid binding;MF:RNA-directed DNA polymerase activity;MF:nucleic acid binding;MF:RNA-directed DNA polymerase activity;MF:nucleic acid binding;MF:RNA-directed DNA polymerase activity;MF:nucleic acid binding;MF:RNA-directed DNA polymerase activity;	------	------	------	------	------	------	gi|125987635|sp|P0C2F6.1|RNHX1_ARATH;	RecName: Full=Putative ribonuclease H protein At1g65750;	PF13966.3	zf-RVT	zinc-binding in reverse transcriptase
TRINITY_DN47159_c1_g4	1423	72.36	18.73	15.66	heat shock 70 kDa protein 6, chloroplastic-like [Durio zibethinus]	GO:0006457;GO:0006457;GO:0006457;GO:0005524;GO:0051082;GO:0005524;GO:0051082;GO:0005524;GO:0051082	BP:protein folding;BP:protein folding;BP:protein folding;MF:ATP binding;MF:unfolded protein binding;MF:ATP binding;MF:unfolded protein binding;MF:ATP binding;MF:unfolded protein binding;	K03283	HSPA1_8	map04144;map04141;map03040	Endocytosis;Protein processing in endoplasmic reticulum;Spliceosome	COG0443	O:Posttranslational modification, protein turnover, chaperones	gi|399942|sp|Q02028.1|HSP7S_PEA;	RecName: Full=Stromal 70 kDa heat shock-related protein, chloroplastic; Flags: Precursor;	PF00012.17	HSP70	Hsp70 protein
TRINITY_DN47167_c2_g2	4804	1.845	0.25	0.32	PREDICTED: serine/threonine-protein phosphatase PP1 [Elaeis guineensis]	GO:0046872;GO:0004721;GO:0046872;GO:0004721;GO:0046872;GO:0004721	MF:metal ion binding;MF:phosphoprotein phosphatase activity;MF:metal ion binding;MF:phosphoprotein phosphatase activity;MF:metal ion binding;MF:phosphoprotein phosphatase activity;	K06269	PPP1C	map03015	mRNA surveillance pathway	------	------	gi|75312309|sp|Q9M9W3.1|PP19_ARATH;	RecName: Full=Serine/threonine-protein phosphatase PP1 isozyme 9;	PF16891.2	STPPase_N	Serine-threonine protein phosphatase N-terminal domain
TRINITY_DN47168_c0_g1	1885	0.035	2.28	5.31		------	------	------	------	------	------	------	------	------	------	------	------	------
TRINITY_DN47176_c6_g1	685	28.83	86.735	415.05	PREDICTED: lachrymatory-factor synthase-like [Phoenix dactylifera]	------	------	------	------	------	------	------	------	gi|25008713|sp|P59082.1|LFS_ALLCE;	RecName: Full=Lachrymatory-factor synthase; Flags: Precursor [Allium cepa];	PF10604.6	Polyketide_cyc2	Polyketide cyclase / dehydrase and lipid transport
TRINITY_DN47178_c1_g1	1858	12.935	1.76	2.635	PREDICTED: ABC transporter B family member 20-like [Phoenix dactylifera]	GO:0016021;GO:0005524;GO:0042626	CC:integral component of membrane;MF:ATP binding;MF:ATPase activity, coupled to transmembrane movement of substances;	K05658	ABCB1, CD243	map02010	ABC transporters	------	------	gi|90101414|sp|Q8LPT1.2|AB6B_ARATH;	RecName: Full=ABC transporter B family member 6; Short=ABC transporter ABCB.6; Short=AtABCB6; AltName: Full=Multidrug resistance protein 6; AltName: Full=P-glycoprotein 6;	PF00005.24;PF00664.20	ABC_tran;ABC_membrane	ABC transporter;ABC transporter transmembrane region
TRINITY_DN47251_c5_g2	969	4.32	15.13	28.485	PREDICTED: uncharacterized protein LOC4340584 [Oryza sativa Japonica Group]	------	------	------	------	------	------	------	------	------	------	------	------	------
TRINITY_DN47336_c1_g1	1738	58.21	11.245	10.92	PREDICTED: NAC domain-containing protein 35-like [Elaeis guineensis]	GO:0006355;GO:0006351;GO:1901002;GO:1902584;GO:0045893;GO:0006351;GO:0006355;GO:0006351;GO:0005634;GO:0005634;GO:0005634;GO:0003677;GO:0043565;GO:0003677	BP:regulation of transcription, DNA-templated;BP:transcription, DNA-templated;BP:positive regulation of response to salt stress;BP:positive regulation of response to water deprivation;BP:positive regulation of transcription, DNA-templated;BP:transcription, DNA-templated;BP:regulation of transcription, DNA-templated;BP:transcription, DNA-templated;CC:nucleus;CC:nucleus;CC:nucleus;MF:DNA binding;MF…	------	------	------	------	------	------	gi|75217017|sp|Q9ZVP8.2|NAC35_ARATH;	RecName: Full=NAC domain-containing protein 35; Short=ANAC035; AltName: Full=Protein LONG VEGETATIVE PHASE 1; Short=AtLOV1;	PF02365.12	NAM	No apical meristem
TRINITY_DN47359_c1_g2	1866	0.085	1.815	4.08	sucrose transport protein SUT2 [Ananas comosus]	GO:0005887;GO:0005887;GO:0005887;GO:0008515;GO:0008515;GO:0008515	CC:integral component of plasma membrane;CC:integral component of plasma membrane;CC:integral component of plasma membrane;MF:sucrose transmembrane transporter activity;MF:sucrose transmembrane transporter activity;MF:sucrose transmembrane transporter activity;	K15378	SLC45A1_2_4	------	------	------	------	gi|158564095|sp|Q0ILJ3.2|SUT2_ORYSJ;	RecName: Full=Sucrose transport protein SUT2; AltName: Full=SUC4-like protein; AltName: Full=Sucrose permease 2; AltName: Full=Sucrose transporter 2; Short=OsSUT2; AltName: Full=Sucrose-proton symporter 2;	------	------	------
TRINITY_DN47364_c2_g3	767	0	0	7.51	expansin-A1 [Carica papaya]	GO:0009664;GO:0009664;GO:0005618;GO:0005576;GO:0016020;GO:0005618;GO:0005576;GO:0016020	BP:plant-type cell wall organization;BP:plant-type cell wall organization;CC:cell wall;CC:extracellular region;CC:membrane;CC:cell wall;CC:extracellular region;CC:membrane;	------	------	------	------	------	------	gi|115502385|sp|O80622.2|EXP15_ARATH;	RecName: Full=Expansin-A15; Short=AtEXPA15; AltName: Full=Alpha-expansin-15; Short=At-EXP15; Short=AtEx15; AltName: Full=Ath-ExpAlpha-1.3; Flags: Precursor;	PF01357.18;PF03330.15	Pollen_allerg_1;DPBB_1	Pollen allergen;Lytic transglycolase
TRINITY_DN47416_c1_g1	929	53.15	3.765	2.32	uncharacterized protein LOC110093977 [Dendrobium catenatum]	GO:0045454;GO:0035556;GO:0045454;GO:0035556;GO:0005622;GO:0005622;GO:0009055;GO:0015035;GO:0009055;GO:0015035	BP:cell redox homeostasis;BP:intracellular signal transduction;BP:cell redox homeostasis;BP:intracellular signal transduction;CC:intracellular;CC:intracellular;MF:electron carrier activity;MF:protein disulfide oxidoreductase activity;MF:electron carrier activity;MF:protein disulfide oxidoreductase activity;	------	------	------	------	------	------	gi|13878514|sp|Q9JY15.1|GLRX_NEIMB;	RecName: Full=Glutaredoxin;	PF00462.21	Glutaredoxin	Glutaredoxin
TRINITY_DN47472_c7_g2	626	18.545	4.845	1.835	PREDICTED: E3 ubiquitin-protein ligase MIEL1-like isoform X1 [Musa acuminata subsp. malaccensis]	GO:0016567;GO:0005634;GO:0008270;GO:0016740;GO:0008270	BP:protein ubiquitination;CC:nucleus;MF:zinc ion binding;MF:transferase activity;MF:zinc ion binding;	K10144	RCHY1, PIRH2	map04120	Ubiquitin mediated proteolysis	------	------	gi|75304481|sp|Q8VZK0.1|MIEL1_ARATH;	RecName: Full=E3 ubiquitin-protein ligase MIEL1; AltName: Full=MYB30-interacting E3 ligase 1;	------	------	------
TRINITY_DN47481_c4_g2	404	116.325	9.02	9.335		------	------	------	------	------	------	------	------	------	------	PF12734.4	CYSTM	Cysteine-rich TM module stress tolerance
TRINITY_DN47546_c1_g6	467	1721.38	413.12	359.79	aquaporin [Gladiolus hybrid cultivar]	GO:0034220;GO:0016021;GO:0042807;GO:0005887;GO:0009705;GO:0016021;GO:0015267;GO:0015250;GO:0015267	BP:ion transmembrane transport;CC:integral component of membrane;CC:central vacuole;CC:integral component of plasma membrane;CC:plant-type vacuole membrane;CC:integral component of membrane;MF:channel activity;MF:water channel activity;MF:channel activity;	K09873	TIP	------	------	COG0580	G:Carbohydrate transport and metabolism	gi|32363406|sp|Q9FGL2.1|TIP23_ARATH;	RecName: Full=Aquaporin TIP2-3; AltName: Full=Tonoplast intrinsic protein 2-3; Short=AtTIP2;3; Contains: RecName: Full=Aquaporin TIP2-3, N-terminally processed;	PF00230.17	MIP	Major intrinsic protein
TRINITY_DN47569_c10_g1	1128	2.3	0.165	0.145	uncharacterized protein A4U43_C05F19150 [Asparagus officinalis]	------	------	------	------	------	------	------	------	------	------	PF03478.15	DUF295	Protein of unknown function
TRINITY_DN47571_c7_g3	1308	0.43	1.96	9.34	uncharacterized protein LOC112164197 [Rosa chinensis]	GO:0003676	MF:nucleic acid binding;	------	------	------	------	------	------	gi|75322747|sp|Q681X4.1|ZAT5_ARATH;	RecName: Full=Zinc finger protein ZAT5;	PF13912.3;PF13894.3;PF12756.4	zf-C2H2_6;zf-C2H2_4;zf-C2H2_2	C2H2-type zinc finger;C2H2-type zinc finger;C2H2 type zinc-finger
TRINITY_DN47691_c7_g1	1129	11.27	31.94	52.935	protein NRT1/ PTR FAMILY 2.13-like isoform X2 [Asparagus officinalis]	------	------	------	------	------	------	------	------	gi|75158815|sp|Q8RX77.1|PTR21_ARATH;	RecName: Full=Protein NRT1/ PTR FAMILY 2.13; Short=AtNPF2.13; AltName: Full=Nitrate transporter 1.7;	PF00854.18	PTR2	POT family
TRINITY_DN47698_c4_g2	777	10.29	0	0.215		------	------	------	------	------	------	------	------	------	------	------	------	------
TRINITY_DN47710_c4_g1	1161	0.44	6.18	31.765	PREDICTED: chaperone protein DnaJ-like isoform X1 [Elaeis guineensis]	------	------	------	------	------	------	------	------	------	------	PF00226.28	DnaJ	DnaJ domain
TRINITY_DN47798_c1_g1	820	3.98	0.445	0.15		------	------	------	------	------	------	------	------	------	------	------	------	------
TRINITY_DN47836_c3_g2	1703	22.99	3.395	5.405	PREDICTED: histone-lysine N-methyltransferase SETD1B [Elaeis guineensis]	GO:0008152;GO:0016758	BP:metabolic process;MF:transferase activity, transferring hexosyl groups;	------	------	------	------	------	------	gi|75315657|sp|Q9ZQ96.1|U73C3_ARATH;	RecName: Full=UDP-glycosyltransferase 73C3;	PF00201.15	UDPGT	UDP-glucoronosyl and UDP-glucosyl transferase
TRINITY_DN47914_c3_g1	1451	34.505	5.53	6.965	uncharacterized protein A4U43_C02F6330 [Asparagus officinalis]	GO:0005524;GO:0004672;GO:0005524;GO:0004672	MF:ATP binding;MF:protein kinase activity;MF:ATP binding;MF:protein kinase activity;	------	------	------	------	------	------	gi|75333641|sp|Q9CAD5.1|YODA_ARATH;	RecName: Full=Mitogen-activated protein kinase kinase kinase YODA; AltName: Full=YODA MAPKK kinase;	------	------	------
TRINITY_DN47933_c7_g2	1750	1.185	0.5	0	PREDICTED: monocopper oxidase-like protein SKU5 [Phoenix dactylifera]	GO:0005507;GO:0016491;GO:0005507;GO:0016491	MF:copper ion binding;MF:oxidoreductase activity;MF:copper ion binding;MF:oxidoreductase activity;	------	------	------	------	------	------	gi|38258655|sp|Q9SU40.1|SKU5_ARATH;	RecName: Full=Monocopper oxidase-like protein SKU5; AltName: Full=Skewed roots; Flags: Precursor;	PF07732.12;PF00394.19;PF07731.11	Cu-oxidase_3;Cu-oxidase;Cu-oxidase_2	Multicopper oxidase;Multicopper oxidase;Multicopper oxidase
TRINITY_DN47938_c5_g2	2340	0.175	2.375	5.35		------	------	------	------	------	------	------	------	------	------	------	------	------
TRINITY_DN47942_c2_g7	898	25.975	0.995	0.85	PREDICTED: probable LRR receptor-like serine/threonine-protein kinase At1g07650 [Musa acuminata subsp. malaccensis]	------	------	------	------	------	------	------	------	gi|264664462|sp|C0LGE0.1|Y1765_ARATH;	RecName: Full=Probable LRR receptor-like serine/threonine-protein kinase At1g07650; Flags: Precursor;	PF07714.14;PF00069.22	Pkinase_Tyr;Pkinase	Protein tyrosine kinase;Protein kinase domain
TRINITY_DN47949_c1_g1	2142	0.465	1.53	4.77		------	------	------	------	------	------	------	------	------	------	------	------	------
TRINITY_DN47950_c1_g1	2272	340.7	51.235	58.3	Flavonoid glucosyltransferase, family GT1 [Zostera marina]	GO:0008152;GO:0008152;GO:0008152;GO:0008152;GO:0016758;GO:0016758;GO:0016758;GO:0016758	BP:metabolic process;BP:metabolic process;BP:metabolic process;BP:metabolic process;MF:transferase activity, transferring hexosyl groups;MF:transferase activity, transferring hexosyl groups;MF:transferase activity, transferring hexosyl groups;MF:transferase activity, transferring hexosyl groups;	------	------	------	------	------	------	gi|334351258|sp|Q9C9B0.2|U89B1_ARATH;	RecName: Full=UDP-glycosyltransferase 89B1; AltName: Full=Flavonol 3-O-glucosyltransferase UGT89B1; AltName: Full=Flavonol 7-O-glucosyltransferase UGT89B1;	PF00201.15;PF04101.13	UDPGT;Glyco_tran_28_C	UDP-glucoronosyl and UDP-glucosyl transferase;Glycosyltransferase family 28 C-terminal domain
TRINITY_DN47992_c3_g2	1384	4.525	0.38	0.47		------	------	------	------	------	------	------	------	------	------	------	------	------
TRINITY_DN48009_c7_g1	2985	0	1.6	2.58	putative LRR receptor-like serine/threonine-protein kinase [Dendrobium catenatum]	GO:0016021;GO:0016301;GO:0005524;GO:0004714	CC:integral component of membrane;MF:kinase activity;MF:ATP binding;MF:transmembrane receptor protein tyrosine kinase activity;	------	------	------	------	------	------	------	------	------	------	------
TRINITY_DN48012_c2_g2	1663	0	0	1.915	PREDICTED: scarecrow-like protein 8 [Phoenix dactylifera]	GO:0006355;GO:0006351;GO:0006355;GO:0006351;GO:0006355;GO:0006351;GO:0006355;GO:0006351;GO:0006355;GO:0006351	BP:regulation of transcription, DNA-templated;BP:transcription, DNA-templated;BP:regulation of transcription, DNA-templated;BP:transcription, DNA-templated;BP:regulation of transcription, DNA-templated;BP:transcription, DNA-templated;BP:regulation of transcription, DNA-templated;BP:transcription, DNA-templated;BP:regulation of transcription, DNA-templated;BP:transcription, DNA-templated;	------	------	------	------	------	------	gi|75173299|sp|Q9FYR7.1|SCL8_ARATH;	RecName: Full=Scarecrow-like protein 8; Short=AtSCL8; AltName: Full=GRAS family protein 30; Short=AtGRAS-30;	PF03514.11	GRAS	GRAS domain family
TRINITY_DN48051_c4_g5	624	142.15	129.085	2.02	non-specific lipid-transfer protein 1-like [Dendrobium catenatum]	GO:0006869;GO:0006869;GO:0006869;GO:0008289;GO:0008289;GO:0008289	BP:lipid transport;BP:lipid transport;BP:lipid transport;MF:lipid binding;MF:lipid binding;MF:lipid binding;	------	------	------	------	------	------	gi|128384|sp|P27631.1|NLTP_DAUCA;	RecName: Full=Non-specific lipid-transfer protein; Short=LTP; AltName: Full=Extracellular protein 2; Flags: Precursor;	PF00234.19;PF14368.3	Tryp_alpha_amyl;LTP_2	Protease inhibitor/seed storage/LTP family;Probable lipid transfer
TRINITY_DN48118_c10_g1	1076	0.7	15.52	38.81	serine--glyoxylate aminotransferase [Populus trichocarpa]	GO:0008483;GO:0003824;GO:0008483	MF:transaminase activity;MF:catalytic activity;MF:transaminase activity;	K00830	AGXT	map00630;map00250;map00260;map04146	Glyoxylate and dicarboxylate metabolism;Alanine, aspartate and glutamate metabolism;Glycine, serine and threonine metabolism;Peroxisome	------	------	gi|90185106|sp|Q56YA5.2|SGAT_ARATH;	RecName: Full=Serine--glyoxylate aminotransferase; AltName: Full=Alanine--glyoxylate aminotransferase; Short=AGT; AltName: Full=Asparagine aminotransferase; AltName: Full=Serine--pyruvate aminotransferase;	------	------	------
TRINITY_DN48127_c2_g2	1756	360.055	43.415	54.23	PREDICTED: ammonium transporter 3 member 1-like [Musa acuminata subsp. malaccensis]	GO:0016021;GO:0016021;GO:0008519;GO:0008519	CC:integral component of membrane;CC:integral component of membrane;MF:ammonium transmembrane transporter activity;MF:ammonium transmembrane transporter activity;	K03320	amt, AMT, MEP	------	------	COG0004	P:Inorganic ion transport and metabolism	gi|75146874|sp|Q84KJ6.1|AMT31_ORYSJ;	RecName: Full=Ammonium transporter 3 member 1; Short=OsAMT3;1;	PF00909.18	Ammonium_transp	Ammonium Transporter Family
TRINITY_DN48142_c3_g2	720	2.38	0.125	0		------	------	------	------	------	------	------	------	------	------	------	------	------
TRINITY_DN48163_c7_g1	916	7.29	0.54	0		------	------	------	------	------	------	------	------	------	------	------	------	------
TRINITY_DN48172_c2_g1	1140	13.505	1.865	2.425	PREDICTED: uncharacterized protein LOC105040143 [Elaeis guineensis]	GO:0016021;GO:0016021;GO:0016021	CC:integral component of membrane;CC:integral component of membrane;CC:integral component of membrane;	------	------	------	------	------	------	------	------	------	------	------
TRINITY_DN48182_c2_g1	2336	2.29	0.535	0.11		------	------	------	------	------	------	------	------	------	------	------	------	------
TRINITY_DN48232_c1_g1	2035	8.06	4.885	0.075		------	------	------	------	------	------	------	------	------	------	------	------	------
TRINITY_DN48250_c3_g5	837	13.35	58.915	93.97	ethylene-responsive transcription factor ERF053-like [Dendrobium catenatum]	GO:0006351;GO:0005634;GO:0003677;GO:0003700	BP:transcription, DNA-templated;CC:nucleus;MF:DNA binding;MF:transcription factor activity, sequence-specific DNA binding;	------	------	------	------	------	------	gi|75264007|sp|Q9LM15.1|RA213_ARATH;	RecName: Full=Ethylene-responsive transcription factor RAP2-13; AltName: Full=Ethylene-responsive transcription factor ERF058; AltName: Full=Protein RELATED TO APETALA2 13;	------	------	------
TRINITY_DN48264_c5_g2	579	69.89	9.73	4.215	PREDICTED: EG45-like domain containing protein [Elaeis guineensis]	------	------	------	------	------	------	------	------	gi|20138450|sp|Q9ZV52.2|EGC2_ARATH;	RecName: Full=EG45-like domain containing protein 2; AltName: Full=Plant natriuretic peptide A; Short=AtEXPR3; Short=AtPNP-A; Short=Ath-ExpGamma-1.2; Flags: Precursor;	PF03330.15	DPBB_1	Lytic transglycolase
TRINITY_DN48273_c6_g3	2929	0.86	0.195	0.07		------	------	------	------	------	------	------	------	------	------	------	------	------
TRINITY_DN48289_c4_g2	907	13.29	48.45	119.33	PREDICTED: 15.4 kDa class V heat shock protein [Phoenix dactylifera]	------	------	K13993	HSP20	map04141	Protein processing in endoplasmic reticulum	------	------	gi|75278048|sp|O49710.1|HS154_ARATH;	RecName: Full=15.4 kDa class V heat shock protein; AltName: Full=15.4 kDa heat shock protein; Short=AtHsp15.4;	PF00011.18	HSP20	Hsp20/alpha crystallin family
TRINITY_DN48405_c5_g1	785	33.56	1.38	0	rust resistance kinase Lr10-like [Ananas comosus]	GO:0016021;GO:0005524;GO:0004672;GO:0005524;GO:0004672	CC:integral component of membrane;MF:ATP binding;MF:protein kinase activity;MF:ATP binding;MF:protein kinase activity;	------	------	------	------	------	------	------	------	------	------	------
TRINITY_DN48428_c10_g2	552	157.415	6.14	5.635	polygalacturonase inhibitor-like [Asparagus officinalis]	------	------	------	------	------	------	------	------	gi|464367|sp|Q05091.1|PGIP_PYRCO;	RecName: Full=Polygalacturonase inhibitor; AltName: Full=Polygalacturonase-inhibiting protein; Short=PGIG; Flags: Precursor;	PF08263.9	LRRNT_2	Leucine rich repeat N-terminal domain
TRINITY_DN48431_c2_g1	1623	1.99	0.12	0.06	putative copia-type protein [Trifolium pratense]	------	------	------	------	------	------	------	------	------	------	------	------	------
TRINITY_DN48431_c4_g3	1708	1.145	2.505	8.785	PREDICTED: probable ribose-5-phosphate isomerase 4, chloroplastic isoform X1 [Phoenix dactylifera]	GO:0009052;GO:0009052;GO:0004751;GO:0004751	BP:pentose-phosphate shunt, non-oxidative branch;BP:pentose-phosphate shunt, non-oxidative branch;MF:ribose-5-phosphate isomerase activity;MF:ribose-5-phosphate isomerase activity;	K01807	rpiA	map00030;map00710	Pentose phosphate pathway;Carbon fixation in photosynthetic organisms	------	------	gi|75262498|sp|Q9FI13.1|RPI4_ARATH;	RecName: Full=Probable ribose-5-phosphate isomerase 4, chloroplastic; AltName: Full=Phosphoriboisomerase 4; Flags: Precursor;	PF06026.11	Rib_5-P_isom_A	Ribose 5-phosphate isomerase A
TRINITY_DN48499_c0_g1	3139	22.915	8.39	2.345	uncharacterized protein A4U43_C09F860 [Asparagus officinalis]	------	------	------	------	------	------	------	------	------	------	------	------	------
TRINITY_DN48503_c0_g1	1451	3.06	0	0.125		------	------	------	------	------	------	------	------	------	------	------	------	------
TRINITY_DN48514_c1_g3	842	1379.04	431.48	303.985	PREDICTED: cell number regulator 2 [Elaeis guineensis]	GO:0008285;GO:0016021;GO:0016021	BP:negative regulation of cell proliferation;CC:integral component of membrane;CC:integral component of membrane;	------	------	------	------	------	------	gi|75180217|sp|Q9LQU4.1|PCR2_ARATH;	RecName: Full=Protein PLANT CADMIUM RESISTANCE 2; Short=AtPCR2;	PF04749.14	PLAC8	PLAC8 family
TRINITY_DN48540_c2_g2	1712	2.5	0.015	0.165		------	------	------	------	------	------	------	------	------	------	------	------	------
TRINITY_DN48677_c5_g3	1221	0.055	9.335	3.17	serine/threonine-protein kinase SAPK3-like [Rosa chinensis]	GO:0035556;GO:0006468;GO:0005737;GO:0005634;GO:0005524;GO:0004674;GO:0005524;GO:0004674	BP:intracellular signal transduction;BP:protein phosphorylation;CC:cytoplasm;CC:nucleus;MF:ATP binding;MF:protein serine/threonine kinase activity;MF:ATP binding;MF:protein serine/threonine kinase activity;	K14498	SNRK2	map04016;map04075	MAPK signaling pathway - plant;Plant hormone signal transduction	COG0515	T:Signal transduction mechanisms	gi|158513710|sp|A2ZAB5.2|SAPK3_ORYSI;	RecName: Full=Serine/threonine-protein kinase SAPK3; AltName: Full=Osmotic stress/abscisic acid-activated protein kinase 3; AltName: Full=Protein kinase REK >gi|158517784|sp|P0C5D6.1|SAPK3_ORYSJ RecName: Full=Serine/threonine-protein kinase SAPK3; AltName: Full=Osmotic stress/abscisic acid-activated protein kinase 3; AltName: Full=Protein kinase REK;	PF00069.22;PF07714.14	Pkinase;Pkinase_Tyr	Protein kinase domain;Protein tyrosine kinase
TRINITY_DN48754_c0_g7	1762	1.28	0.34	0.085		------	------	------	------	------	------	------	------	------	------	------	------	------
TRINITY_DN48814_c3_g3	1135	8.42	0.4	0.41	LOW QUALITY PROTEIN: scarecrow-like protein 9, partial [Asparagus officinalis]	GO:0006355;GO:0006351	BP:regulation of transcription, DNA-templated;BP:transcription, DNA-templated;	------	------	------	------	------	------	gi|75099994|sp|O80933.1|SCL9_ARATH;	RecName: Full=Scarecrow-like protein 9; Short=AtSCL9; AltName: Full=GRAS family protein 13; Short=AtGRAS-13;	PF03514.11	GRAS	GRAS domain family
TRINITY_DN48833_c9_g1	937	0	0.8	2.825		------	------	------	------	------	------	------	------	------	------	------	------	------
TRINITY_DN48937_c7_g2	1147	24.78	2.825	3.83	PREDICTED: probable serine/threonine-protein kinase PIX13 [Elaeis guineensis]	GO:0005524;GO:0004674;GO:0005524;GO:0004674	MF:ATP binding;MF:protein serine/threonine kinase activity;MF:ATP binding;MF:protein serine/threonine kinase activity;	K04733	IRAK4	------	------	COG0515	T:Signal transduction mechanisms	gi|12644274|sp|P46573.2|APK1B_ARATH;	RecName: Full=Protein kinase APK1B, chloroplastic; Flags: Precursor;	PF00069.22;PF07714.14	Pkinase;Pkinase_Tyr	Protein kinase domain;Protein tyrosine kinase
TRINITY_DN48976_c7_g1	1686	33.695	6.84	3.315		------	------	------	------	------	------	------	------	------	------	------	------	------
TRINITY_DN48980_c0_g5	759	32.055	196.455	280.89	PREDICTED: zinc finger CCCH domain-containing protein 20-like [Glycine max]	GO:0046872;GO:0046872	MF:metal ion binding;MF:metal ion binding;	------	------	------	------	------	------	gi|75262988|sp|Q9FU27.1|C3H2_ORYSJ;	RecName: Full=Zinc finger CCCH domain-containing protein 2; Short=OsC3H2; AltName: Full=Protein DELAY OF THE ONSET OF SENESCENCE; Short=OsDOS;	------	------	------
TRINITY_DN48987_c5_g2	1438	0	0.38	2.5		------	------	------	------	------	------	------	------	------	------	------	------	------
TRINITY_DN48989_c1_g4	1749	5.185	0.34	0.185		------	------	------	------	------	------	------	------	------	------	------	------	------
TRINITY_DN49018_c3_g1	2092	8.51	5.615	0.66		------	------	------	------	------	------	------	------	------	------	------	------	------
TRINITY_DN49035_c3_g4	2074	5.495	0.01	0.11	PREDICTED: putative transcription factor bHLH041 [Elaeis guineensis]	------	------	------	------	------	------	------	------	gi|75311566|sp|Q9LTS4.1|BH041_ARATH;	RecName: Full=Putative transcription factor bHLH041; AltName: Full=Basic helix-loop-helix protein 41; Short=AtbHLH41; Short=bHLH 41; AltName: Full=Transcription factor EN 51; AltName: Full=bHLH transcription factor bHLH041;	PF00010.23	HLH	Helix-loop-helix DNA-binding domain
TRINITY_DN49123_c5_g1	291	46.545	0.615	0		------	------	------	------	------	------	------	------	------	------	------	------	------
TRINITY_DN49193_c1_g2	2557	52.245	10.815	12.185	PREDICTED: LOW QUALITY PROTEIN: uncharacterized protein LOC105052954 [Elaeis guineensis]	------	------	------	------	------	------	------	------	------	------	PF00514.20;PF01602.17	Arm;Adaptin_N	Armadillo/beta-catenin-like repeat;Adaptin N terminal region
TRINITY_DN49269_c1_g1	1014	1.57	4.54	44.84	PREDICTED: blue copper protein-like [Elaeis guineensis]	GO:0016021;GO:0016021;GO:0009055;GO:0009055;GO:0009055;GO:0009055	CC:integral component of membrane;CC:integral component of membrane;MF:electron carrier activity;MF:electron carrier activity;MF:electron carrier activity;MF:electron carrier activity;	------	------	------	------	------	------	gi|2493318|sp|Q41001.1|BCP_PEA;	RecName: Full=Blue copper protein; Flags: Precursor;	PF02298.14	Cu_bind_like	Plastocyanin-like domain
TRINITY_DN49269_c2_g1	586	0	0.875	10.8	blue copper protein-like [Phalaenopsis equestris]	------	------	------	------	------	------	------	------	gi|2493318|sp|Q41001.1|BCP_PEA;	RecName: Full=Blue copper protein; Flags: Precursor;	PF02298.14	Cu_bind_like	Plastocyanin-like domain
TRINITY_DN49330_c1_g3	1027	19.61	0.295	0.72	PREDICTED: diacylglycerol kinase 5-like isoform X2 [Ziziphus jujuba]	------	------	K00901	dgkA, DGK	map00564;map04070;map00561	Glycerophospholipid metabolism;Phosphatidylinositol signaling system;Glycerolipid metabolism	------	------	gi|75168938|sp|Q9C5E5.1|DGK5_ARATH;	RecName: Full=Diacylglycerol kinase 5; Short=AtDGK5; Short=DAG kinase 5; AltName: Full=Diglyceride kinase 5; Short=DGK 5;	------	------	------
TRINITY_DN49475_c0_g2	1871	7.205	2.65	0.665	PREDICTED: cytochrome P450 89A2 [Elaeis guineensis]	GO:0020037;GO:0005506;GO:0004497;GO:0016705;GO:0020037;GO:0005506;GO:0004497;GO:0016705;GO:0020037;GO:0005506;GO:0004497;GO:0016705	MF:heme binding;MF:iron ion binding;MF:monooxygenase activity;MF:oxidoreductase activity, acting on paired donors, with incorporation or reduction of molecular oxygen;MF:heme binding;MF:iron ion binding;MF:monooxygenase activity;MF:oxidoreductase activity, acting on paired donors, with incorporation or reduction of molecular oxygen;MF:heme binding;MF:iron ion binding;MF:monooxygenase activity;MF:…	------	------	------	------	------	------	gi|13878919|sp|Q42602.2|C89A2_ARATH;	RecName: Full=Cytochrome P450 89A2; AltName: Full=ATH 6-1; AltName: Full=CYPLXXXIX;	PF00067.19	p450	Cytochrome P450
TRINITY_DN49479_c5_g1	1713	36.665	9.97	4.95	PREDICTED: probable cinnamyl alcohol dehydrogenase 6 [Capsicum annuum]	GO:0008270;GO:0016491;GO:0016491;GO:0008270;GO:0016491;GO:0008270	MF:zinc ion binding;MF:oxidoreductase activity;MF:oxidoreductase activity;MF:zinc ion binding;MF:oxidoreductase activity;MF:zinc ion binding;	K00083	E1.1.1.195	map00940	Phenylpropanoid biosynthesis	------	------	gi|75327567|sp|Q7XWU3.2|CADH6_ORYSJ;	RecName: Full=Probable cinnamyl alcohol dehydrogenase 6; Short=OsCAD6;	PF02826.16;PF00107.23	2-Hacid_dh_C;ADH_zinc_N	D-isomer specific 2-hydroxyacid dehydrogenase, NAD binding domain;Zinc-binding dehydrogenase
TRINITY_DN49504_c2_g4	876	8.01	16.14	290.605	putative thiamine biosynthesis protein [Oryza sativa Japonica Group]	GO:0009228;GO:0052837;GO:0006950;GO:0009228;GO:0052837;GO:0005829;GO:0009507;GO:0005829;GO:0005506;GO:0005506	BP:thiamine biosynthetic process;BP:thiazole biosynthetic process;BP:response to stress;BP:thiamine biosynthetic process;BP:thiazole biosynthetic process;CC:cytosol;CC:chloroplast;CC:cytosol;MF:iron ion binding;MF:iron ion binding;	K03146	THI4, THI1	map00730	Thiamine metabolism	------	------	gi|378524288|sp|F6H9A9.1|THI41_VITVI;	RecName: Full=Thiamine thiazole synthase 1, chloroplastic; AltName: Full=Thiazole biosynthetic enzyme 1; Flags: Precursor;	------	------	------
TRINITY_DN49521_c0_g1	965	0.07	0.205	2.94		------	------	------	------	------	------	------	------	------	------	------	------	------
TRINITY_DN49585_c1_g1	1337	0.84	0	12.945	PREDICTED: auxin efflux carrier component 5 [Phoenix dactylifera]	GO:0009734;GO:0055085;GO:0009734;GO:0055085;GO:0016021;GO:0016021	BP:auxin-activated signaling pathway;BP:transmembrane transport;BP:auxin-activated signaling pathway;BP:transmembrane transport;CC:integral component of membrane;CC:integral component of membrane;	K13947	PIN	------	------	------	------	gi|42558880|sp|Q9FFD0.2|PIN5_ARATH;	RecName: Full=Auxin efflux carrier component 5; Short=AtPIN5;	PF03547.15	Mem_trans	Membrane transport protein
TRINITY_DN49605_c2_g3	677	7.39	28.465	38.18		------	------	------	------	------	------	------	------	------	------	------	------	------
TRINITY_DN49649_c5_g1	471	22.15	390.62	454.805	hypothetical protein CRG98_046318 [Punica granatum]	GO:0005739;GO:0016740	CC:mitochondrion;MF:transferase activity;	------	------	------	------	------	------	gi|110816488|sp|Q3BAI2.1|YCX91_PHAAO;	RecName: Full=Uncharacterized protein ORF91;	------	------	------
TRINITY_DN49678_c0_g1	1909	5.125	0.145	0.695	PREDICTED: receptor-like serine/threonine-protein kinase SD1-8 [Phoenix dactylifera]	GO:0048544;GO:0016021;GO:0005524;GO:0004674	BP:recognition of pollen;CC:integral component of membrane;MF:ATP binding;MF:protein serine/threonine kinase activity;	------	------	------	------	------	------	gi|75318808|sp|O81905.1|SD18_ARATH;	RecName: Full=Receptor-like serine/threonine-protein kinase SD1-8; AltName: Full=Arabidopsis thaliana receptor kinase 3; AltName: Full=S-domain-1;	PF00954.17;PF08276.8;PF01453.21;PF07714.14;PF00069.22;PF01636.20	S_locus_glycop;PAN_2;B_lectin;Pkinase_Tyr;Pkinase;APH	S-locus glycoprotein domain;PAN-like domain;D-mannose binding lectin;Protein tyrosine kinase;Protein kinase domain;Phosphotransferase enzyme family
TRINITY_DN49773_c0_g1	2327	51.965	4.45	5.45	U-box domain-containing protein 44-like [Asparagus officinalis]	------	------	------	------	------	------	------	------	gi|75264018|sp|Q9LM76.1|PUB44_ARATH;	RecName: Full=U-box domain-containing protein 44; AltName: Full=Plant U-box protein 44; AltName: Full=Protein SENESCENCE-ASSOCIATED E3 UBIQUITIN LIGASE 1;	PF00514.20;PF12717.4;PF05804.9	Arm;Cnd1;KAP	Armadillo/beta-catenin-like repeat;non-SMC mitotic condensation complex subunit 1;Kinesin-associated protein
TRINITY_DN49774_c4_g2	2800	2.67	26.015	27.405	maternal effect embryo arrest 14, partial [Elaeis guineensis]	GO:0010183;GO:0010183;GO:0036033;GO:0036033	BP:pollen tube guidance;BP:pollen tube guidance;MF:mediator complex binding;MF:mediator complex binding;	------	------	------	------	------	------	gi|75215741|sp|Q9XIM0.1|MEE14_ARATH;	RecName: Full=CCG-binding protein 1; Short=AtCBP1; AltName: Full=Protein MATERNAL EFFECT EMBRYO ARREST 14;	------	------	------
TRINITY_DN49816_c0_g7	1649	87.335	18.35	18.25	PREDICTED: transcription factor MYC2-like [Elaeis guineensis]	GO:0046983;GO:0046983;GO:0046983	MF:protein dimerization activity;MF:protein dimerization activity;MF:protein dimerization activity;	K13422	MYC2	map04016;map04075	MAPK signaling pathway - plant;Plant hormone signal transduction	------	------	gi|122248973|sp|Q336P5.1|MYC2_ORYSJ;	RecName: Full=Transcription factor MYC2; Short=OsMYC2; AltName: Full=Basic helix-loop-helix protein 9; Short=OsbHLH009; Short=bHLH 9;	PF14215.3;PF00010.23	bHLH-MYC_N;HLH	bHLH-MYC and R2R3-MYB transcription factors N-terminal;Helix-loop-helix DNA-binding domain
TRINITY_DN49837_c0_g2	1569	1.635	0	0.08	uncharacterized protein LOC109712821 [Ananas comosus]	------	------	------	------	------	------	------	------	------	------	PF02992.11;PF13960.3	Transposase_21;DUF4218	Transposase family tnp2;Domain of unknown function
TRINITY_DN49840_c2_g1	279	0	0	312.69		------	------	------	------	------	------	------	------	------	------	------	------	------
TRINITY_DN49840_c6_g2	1285	2.025	0.435	0.145		------	------	------	------	------	------	------	------	------	------	------	------	------
TRINITY_DN49845_c6_g1	1358	0.02	0.555	3.68	uncharacterized protein LOC109846096 [Asparagus officinalis]	------	------	------	------	------	------	------	------	------	------	PF03732.14	Retrotrans_gag	Retrotransposon gag protein
TRINITY_DN49865_c2_g1	1884	0.31	0.23	4.365		------	------	------	------	------	------	------	------	------	------	------	------	------
TRINITY_DN49868_c0_g1	601	10.665	1.91	0.85		------	------	------	------	------	------	------	------	------	------	------	------	------
TRINITY_DN49877_c4_g1	1947	0.375	2.53	21.345	PREDICTED: putative glycerol-3-phosphate transporter 1 [Elaeis guineensis]	GO:0016021;GO:0022857	CC:integral component of membrane;MF:transmembrane transporter activity;	K13783	SLC37A1_2	------	------	COG2271	G:Carbohydrate transport and metabolism	gi|75268167|sp|Q9C5L3.1|GLPT1_ARATH;	RecName: Full=Putative glycerol-3-phosphate transporter 1; Short=G-3-P transporter 1; AltName: Full=Glycerol-3-phosphate permease 1; Short=AtG3Pp1; Short=G-3-P permease 1; AltName: Full=Protein PHOSPHATE STARVATION-INDUCED GENE 3; Short=AtPS3;	PF07690.13;PF00083.21	MFS_1;Sugar_tr	Major Facilitator Superfamily;Sugar
TRINITY_DN49880_c11_g1	1276	0.105	0.24	2.745		------	------	------	------	------	------	------	------	------	------	------	------	------
TRINITY_DN49885_c1_g5	1302	93.125	17.505	19.445	PREDICTED: 3-ketoacyl-CoA synthase 4-like [Glycine max]	GO:0006633;GO:0006633;GO:0016021;GO:0016020;GO:0016747;GO:0016747	BP:fatty acid biosynthetic process;BP:fatty acid biosynthetic process;CC:integral component of membrane;CC:membrane;MF:transferase activity, transferring acyl groups other than amino-acyl groups;MF:transferase activity, transferring acyl groups other than amino-acyl groups;	K15397	KCS	map00062	Fatty acid elongation	------	------	gi|75311386|sp|Q9LN49.1|KCS4_ARATH;	RecName: Full=3-ketoacyl-CoA synthase 4; Short=KCS-4; AltName: Full=Very long-chain fatty acid condensing enzyme 4; Short=VLCFA condensing enzyme 4;	PF08392.9;PF08541.7;PF02797.12	FAE1_CUT1_RppA;ACP_syn_III_C;Chal_sti_synt_C	FAE1/Type III polyketide synthase-like protein;3-Oxoacyl-[acyl-carrier-protein;Chalcone and stilbene synthases, C-terminal domain
TRINITY_DN49900_c1_g6	909	0	1.85	4.605	Thioredoxin-like protein HCF164, chloroplastic [Apostasia shenzhenica]	GO:0045454;GO:0005623;GO:0009536	BP:cell redox homeostasis;CC:cell;CC:plastid;	------	------	------	------	------	------	gi|464973|sp|P35088.1|TXLA_SYNE7;	RecName: Full=Thiol:disulfide interchange protein TxlA;	PF00085.17	Thioredoxin	Thioredoxin
TRINITY_DN49909_c4_g3	1096	0.315	0.985	4.675		------	------	------	------	------	------	------	------	------	------	------	------	------
TRINITY_DN49924_c4_g2	2724	9.355	6.405	2.185	DDT domain-containing protein DDB_G0282237-like [Asparagus officinalis]	GO:0005634;GO:0005634	CC:nucleus;CC:nucleus;	------	------	------	------	------	------	gi|74855116|sp|Q54ST3.1|Y2237_DICDI;	RecName: Full=DDT domain-containing protein DDB_G0282237;	PF10537.6;PF02791.14;PF15613.3	WAC_Acf1_DNA_bd;DDT;WSD	ATP-utilising chromatin assembly and remodelling N-terminal;DDT domain;Williams-Beuren syndrome DDT
TRINITY_DN49927_c3_g1	1788	122.585	15.235	37.6	PREDICTED: probable calcium-binding protein CML49 [Phoenix dactylifera]	GO:0005509;GO:0005509	MF:calcium ion binding;MF:calcium ion binding;	K13448	CML	map04626	Plant-pathogen interaction	------	------	gi|75331395|sp|Q8W4L0.1|CML49_ARATH;	RecName: Full=Probable calcium-binding protein CML49; AltName: Full=Calmodulin-like protein 49;	PF13202.3;PF00036.29;PF13405.3;PF13499.3	EF-hand_5;EF-hand_1;EF-hand_6;EF-hand_7	EF hand;EF hand;EF-hand domain;EF-hand domain pair
TRINITY_DN49928_c3_g3	1185	27.23	1.68	3.105	uncharacterized protein LOC110019765 [Phalaenopsis equestris]	GO:0016021;GO:0016021;GO:0016021	CC:integral component of membrane;CC:integral component of membrane;CC:integral component of membrane;	------	------	------	------	------	------	------	------	PF08450.9	SGL	SMP-30/Gluconolaconase/LRE-like region
TRINITY_DN49935_c5_g5	563	0.88	1.6	13.55		------	------	------	------	------	------	------	------	------	------	------	------	------
TRINITY_DN50041_c9_g1	768	0.225	1.24	8.525	PREDICTED: non-specific lipid transfer protein GPI-anchored 2-like [Phoenix dactylifera]	GO:0006869;GO:0006869;GO:0006869;GO:0008289;GO:0008289;GO:0008289	BP:lipid transport;BP:lipid transport;BP:lipid transport;MF:lipid binding;MF:lipid binding;MF:lipid binding;	------	------	------	------	------	------	gi|75181273|sp|Q9LZH5.1|LTPG2_ARATH;	RecName: Full=Non-specific lipid transfer protein GPI-anchored 2; Short=AtLTPG-2; Short=Protein LTP-GPI-ANCHORED 2; AltName: Full=Xylogen-like protein 5; Short=AtXYP5; Flags: Precursor;	PF14368.3;PF00234.19	LTP_2;Tryp_alpha_amyl	Probable lipid transfer;Protease inhibitor/seed storage/LTP family
TRINITY_DN50155_c7_g1	510	0	0.815	9.44		------	------	------	------	------	------	------	------	------	------	------	------	------
TRINITY_DN50158_c1_g1	972	0.135	0.505	4.89		------	------	------	------	------	------	------	------	------	------	------	------	------
TRINITY_DN50236_c3_g3	976	20.735	1.475	1.115	PREDICTED: uncharacterized protein LOC105040818 [Elaeis guineensis]	GO:0016021;GO:0016021;GO:0016021;GO:0016021	CC:integral component of membrane;CC:integral component of membrane;CC:integral component of membrane;CC:integral component of membrane;	------	------	------	------	------	------	------	------	PF01925.16	TauE	Sulfite exporter TauE/SafE
TRINITY_DN50285_c2_g4	1194	1.915	1.785	17.005	PREDICTED: SPX domain-containing protein 1 [Elaeis guineensis]	GO:0016036;GO:0016036;GO:0016036	BP:cellular response to phosphate starvation;BP:cellular response to phosphate starvation;BP:cellular response to phosphate starvation;	------	------	------	------	------	------	gi|75119476|sp|Q69XJ0.1|SPX1_ORYSJ;	RecName: Full=SPX domain-containing protein 1; AltName: Full=Protein SPX DOMAIN GENE 1; Short=OsSPX1;	PF03105.16	SPX	SPX domain
TRINITY_DN50289_c0_g2	1884	1.115	2.015	23.29	probable monogalactosyldiacylglycerol synthase 3, chloroplastic [Ananas comosus]	GO:0009247;GO:0009247;GO:0009247;GO:0016758;GO:0016758;GO:0016758	BP:glycolipid biosynthetic process;BP:glycolipid biosynthetic process;BP:glycolipid biosynthetic process;MF:transferase activity, transferring hexosyl groups;MF:transferase activity, transferring hexosyl groups;MF:transferase activity, transferring hexosyl groups;	K03715	MGD	map00561	Glycerolipid metabolism	COG0707	M:Cell wall/membrane/envelope biogenesis	gi|205815293|sp|Q0DWQ1.2|MGDG3_ORYSJ;	RecName: Full=Probable monogalactosyldiacylglycerol synthase 3, chloroplastic; Short=OsMGD3; Flags: Precursor;	PF06925.8;PF04101.13;PF13692.3	MGDG_synth;Glyco_tran_28_C;Glyco_trans_1_4	Monogalactosyldiacylglycerol;Glycosyltransferase family 28 C-terminal domain;Glycosyl transferases group 1
TRINITY_DN50309_c3_g2	2392	10.375	50.325	107.715	hypothetical protein AXF42_Ash007869 [Apostasia shenzhenica]	GO:0016021;GO:0016021	CC:integral component of membrane;CC:integral component of membrane;	------	------	------	------	------	------	------	------	PF11460.5	DUF3007	Protein of unknown function
TRINITY_DN50312_c3_g7	1283	10.37	0.875	0.81	heavy metal-associated isoprenylated plant protein 3-like [Asparagus officinalis]	GO:0030001;GO:0046872	BP:metal ion transport;MF:metal ion binding;	------	------	------	------	------	------	gi|75262551|sp|Q9FJH5.1|HIP3_ARATH;	RecName: Full=Heavy metal-associated isoprenylated plant protein 3; Short=AtHIPP3; Flags: Precursor;	PF00403.23	HMA	Heavy-metal-associated domain
TRINITY_DN50323_c0_g1	1301	0	0.53	1.155		------	------	------	------	------	------	------	------	------	------	------	------	------
TRINITY_DN50406_c0_g1	1006	8.625	0.795	1	uncharacterized protein LOC107460918 [Arachis duranensis]	------	------	------	------	------	------	------	------	------	------	------	------	------
TRINITY_DN50429_c6_g1	1693	12.955	3.485	0.85	aldehyde dehydrogenase family 3 member F1-like [Asparagus officinalis]	GO:0006081;GO:0004030	BP:cellular aldehyde metabolic process;MF:aldehyde dehydrogenase [NA;	K00128	ALDH	map00310;map00280;map00903;map00340;map00330;map00053;map00410;map00010;map00620;map00071;map00561;map00380	Lysine degradation;Valine, leucine and isoleucine degradation;Limonene and pinene degradation;Histidine metabolism;Arginine and proline metabolism;Ascorbate and aldarate metabolism;beta-Alanine metabolism;Glycolysis / Gluconeogenesis;Pyruvate metabolism;Fatty acid degradation;Glycerolipid metabolism;Tryptophan metabolism	COG1012	C:Energy production and conversion	gi|118595575|sp|Q70E96.2|AL3F1_ARATH;	RecName: Full=Aldehyde dehydrogenase family 3 member F1;	PF00171.19	Aldedh	Aldehyde dehydrogenase family
TRINITY_DN50482_c1_g1	1361	0	1.535	3.685	PREDICTED: protein NRT1/ PTR FAMILY 5.2-like [Elaeis guineensis]	GO:0016021;GO:0016021;GO:0016021;GO:0022857;GO:0022857;GO:0022857	CC:integral component of membrane;CC:integral component of membrane;CC:integral component of membrane;MF:transmembrane transporter activity;MF:transmembrane transporter activity;MF:transmembrane transporter activity;	------	------	------	------	------	------	gi|75171884|sp|Q9FNL7.1|PTR3_ARATH;	RecName: Full=Protein NRT1/ PTR FAMILY 5.2; Short=AtNPF5.2; AltName: Full=Peptide transporter PTR3-A; Short=AtPTR3;	PF00854.18	PTR2	POT family
TRINITY_DN50517_c2_g1	760	9.465	2.66	1.845		------	------	------	------	------	------	------	------	------	------	------	------	------
TRINITY_DN50544_c4_g1	2206	0.18	0.83	1.64	PREDICTED: clp protease adapter protein ClpF, chloroplastic isoform X2 [Elaeis guineensis]	GO:0003677;GO:0003677;GO:0003677	MF:DNA binding;MF:DNA binding;MF:DNA binding;	------	------	------	------	------	------	------	------	------	------	------
TRINITY_DN50547_c5_g2	5608	0.065	0.06	1.16	uncharacterized protein LOC109846318 [Asparagus officinalis]	------	------	------	------	------	------	------	------	------	------	PF10536.6	PMD	Plant mobile domain
TRINITY_DN50580_c3_g2	559	10.595	1.415	0.085		------	------	------	------	------	------	------	------	------	------	------	------	------
TRINITY_DN50622_c1_g3	1031	2.395	9.14	23.455		------	------	------	------	------	------	------	------	------	------	------	------	------
TRINITY_DN50657_c2_g2	832	0.23	3.68	15.88		------	------	------	------	------	------	------	------	------	------	PF12776.4	Myb_DNA-bind_3	Myb/SANT-like DNA-binding domain
TRINITY_DN50684_c4_g2	581	31.97	158.765	345.92	vacuolar-processing enzyme-like isoform X2 [Ananas comosus]	GO:0008233;GO:0008233	MF:peptidase activity;MF:peptidase activity;	K01369	LGMN	------	------	------	------	gi|48429177|sp|O24325.1|VPE1_PHAVU;	RecName: Full=Vacuolar-processing enzyme; Short=VPE; AltName: Full=Legumain-like proteinase; Short=LLP; Flags: Precursor;	------	------	------
TRINITY_DN50734_c7_g1	2814	1.065	0.35	0.145	uncharacterized protein A4U43_C08F5270 [Asparagus officinalis]	GO:0016021;GO:0016021;GO:0005524;GO:0004674;GO:0005524;GO:0004674	CC:integral component of membrane;CC:integral component of membrane;MF:ATP binding;MF:protein serine/threonine kinase activity;MF:ATP binding;MF:protein serine/threonine kinase activity;	------	------	------	------	------	------	gi|264664489|sp|C0LGP4.1|Y3475_ARATH;	RecName: Full=Probable LRR receptor-like serine/threonine-protein kinase At3g47570; Flags: Precursor;	PF00069.22;PF07714.14;PF13855.3;PF12799.4;PF01636.20	Pkinase;Pkinase_Tyr;LRR_8;LRR_4;APH	Protein kinase domain;Protein tyrosine kinase;Leucine rich repeat;Leucine Rich repeats;Phosphotransferase enzyme family
TRINITY_DN50755_c0_g4	1195	0.605	2.38	25.85	PREDICTED: uncharacterized protein LOC105052151 [Elaeis guineensis]	GO:0042744;GO:0006979;GO:0020037;GO:0046872;GO:0004601	BP:hydrogen peroxide catabolic process;BP:response to oxidative stress;MF:heme binding;MF:metal ion binding;MF:peroxidase activity;	K00430	E1.11.1.7	map00940	Phenylpropanoid biosynthesis	------	------	gi|25453190|sp|O23044.1|PER3_ARATH;	RecName: Full=Peroxidase 3; Short=Atperox P3; AltName: Full=ATPRC; AltName: Full=RCI3A; AltName: Full=Rare cold-inducible protein; Flags: Precursor;	PF00141.20	peroxidase	Peroxidase
TRINITY_DN50759_c1_g6	702	51.78	21.39	7.775	uncharacterized protein A4U43_C05F28330 [Asparagus officinalis]	GO:0006537;GO:0050660;GO:0010181;GO:0016040;GO:0005506;GO:0051536	BP:glutamate biosynthetic process;MF:flavin adenine dinucleotide binding;MF:FMN binding;MF:glutamate synthas;MF:iron ion binding;MF:iron-sulfur cluster binding;	K00264	GLT1	map00250;map00910	Alanine, aspartate and glutamate metabolism;Nitrogen metabolism	------	------	gi|417073|sp|Q03460.1|GLSN_MEDSA;	RecName: Full=Glutamate synthase [NADH], amyloplastic; AltName: Full=NADH-GOGAT; Flags: Precursor;	PF00310.18	GATase_2	Glutamine amidotransferases class-II
TRINITY_DN50760_c8_g1	543	148.95	19.575	14.26	PREDICTED: methionine gamma-lyase-like [Musa acuminata subsp. malaccensis]	GO:0016829;GO:0030170;GO:0003824;GO:0030170	MF:lyase activity;MF:pyridoxal phosphate binding;MF:catalytic activity;MF:pyridoxal phosphate binding;	K01761	E4.4.1.11	map00270;map00450	Cysteine and methionine metabolism;Selenocompound metabolism	------	------	gi|75205145|sp|Q9SGU9.1|MGL_ARATH;	RecName: Full=Methionine gamma-lyase; Short=AtMGL; AltName: Full=L-methioninase;	PF01053.17	Cys_Met_Meta_PP	Cys/Met metabolism PLP-dependent enzyme
TRINITY_DN50800_c5_g1	791	40.015	18.395	7.97		------	------	------	------	------	------	------	------	------	------	------	------	------
TRINITY_DN50826_c1_g2	849	0	0.92	4.55		GO:0050660;GO:0046593;GO:0016614;GO:0050660;GO:0016829;GO:0016614	MF:flavin adenine dinucleotide binding;MF:mandelonitrile lyase activity;MF:oxidoreductase activity, acting on CH-OH group of donors;MF:flavin adenine dinucleotide binding;MF:lyase activity;MF:oxidoreductase activity, acting on CH-OH group of donors;	K08248	MDL3	map00460	Cyanoamino acid metabolism	------	------	gi|75207536|sp|Q9SSM2.1|MDLL_ARATH;	RecName: Full;	------	------	------
TRINITY_DN50874_c4_g1	921	0.035	2.585	10.01		------	------	------	------	------	------	------	------	------	------	------	------	------
TRINITY_DN50944_c2_g2	588	5.645	2.295	0		------	------	------	------	------	------	------	------	------	------	------	------	------
TRINITY_DN50950_c5_g1	3056	6.475	47.325	66.735	PREDICTED: TBCC domain-containing protein 1 [Elaeis guineensis]	GO:0000902;GO:0000902	BP:cell morphogenesis;BP:cell morphogenesis;	K16810	TBCCD1	------	------	------	------	------	------	------	------	------
TRINITY_DN50951_c2_g4	738	0	0.91	3.515		------	------	------	------	------	------	------	------	------	------	------	------	------
TRINITY_DN51080_c1_g1	1622	24.755	9.09	5.345	PREDICTED: E3 ubiquitin-protein ligase Os04g0590900 [Elaeis guineensis]	GO:0043161;GO:0016021;GO:0016021;GO:0016021;GO:0016874;GO:0061630	BP:proteasome-mediated ubiquitin-dependent protein catabolic process;CC:integral component of membrane;CC:integral component of membrane;CC:integral component of membrane;MF:ligase activity;MF:ubiquitin protein ligase activity;	------	------	------	------	------	------	gi|75327279|sp|Q7XLY8.2|ATL41_ORYSJ;	RecName: Full=E3 ubiquitin-protein ligase Os04g0590900; AltName: Full=RING-H2 finger protein Os04g0590900;	PF13639.3;PF17123.2;PF12678.4;PF13923.3;PF00097.22;PF12861.4;PF14634.3;PF13445.3;PF13920.3	zf-RING_2;zf-RING_11;zf-rbx1;zf-C3HC4_2;zf-C3HC4;zf-ANAPC11;zf-RING_5;zf-RING_UBOX;zf-C3HC4_3	Ring finger domain;RING-like zinc finger;RING-H2 zinc finger domain;Zinc finger, C3HC4 type;Zinc finger, C3HC4 type;Anaphase-promoting complex subunit 11 RING-H2 finger;zinc-RING finger domain;RING-type zinc-finger;Zinc finger, C3HC4 type
TRINITY_DN51122_c1_g1	2487	20.505	4.165	5.98	extra-large guanine nucleotide-binding protein 3 isoform X3 [Asparagus officinalis]	GO:0007186;GO:0007186;GO:0031683;GO:0005525;GO:0003924;GO:0004871;GO:0031683;GO:0005525;GO:0003924;GO:0004871	BP:G-protein coupled receptor signaling pathway;BP:G-protein coupled receptor signaling pathway;MF:G-protein beta/gamma-subunit complex binding;MF:GTP binding;MF:GTPase activity;MF:signal transducer activity;MF:G-protein beta/gamma-subunit complex binding;MF:GTP binding;MF:GTPase activity;MF:signal transducer activity;	------	------	------	------	------	------	gi|75168876|sp|Q9C516.1|XLG3_ARATH;	RecName: Full=Extra-large guanine nucleotide-binding protein 3; AltName: Full=Extra-large GTP-binding protein 3; Short=Extra-large G-protein 3;	PF00503.17	G-alpha	G-protein alpha subunit
TRINITY_DN51133_c7_g2	2181	4.51	2.685	0.72		------	------	------	------	------	------	------	------	------	------	------	------	------
TRINITY_DN51136_c6_g2	605	3.705	0.75	0		------	------	------	------	------	------	------	------	------	------	------	------	------
TRINITY_DN51138_c8_g1	614	0	0.795	3.935		------	------	------	------	------	------	------	------	------	------	------	------	------
TRINITY_DN51161_c1_g2	1785	0.25	0.06	4.195	PREDICTED: lysosomal Pro-X carboxypeptidase-like [Nelumbo nucifera]	GO:0006508;GO:0004180;GO:0008236;GO:0004180;GO:0008236;GO:0008239;GO:0008236	BP:proteolysis;MF:carboxypeptidase activity;MF:serine-type peptidase activity;MF:carboxypeptidase activity;MF:serine-type peptidase activity;MF:dipeptidyl-peptidase activity;MF:serine-type peptidase activity;	K01285	PRCP	------	------	------	------	gi|122137021|sp|Q2TA14.1|PCP_BOVIN;	RecName: Full=Lysosomal Pro-X carboxypeptidase; AltName: Full=Proline carboxypeptidase; AltName: Full=Prolylcarboxypeptidase; Short=PRCP; Flags: Precursor;	PF05577.9;PF12146.5;PF00561.17;PF11144.5	Peptidase_S28;Hydrolase_4;Abhydrolase_1;DUF2920	Serine carboxypeptidase S28;Serine aminopeptidase, S33;alpha/beta hydrolase fold;Protein of unknown function
TRINITY_DN51199_c1_g6	592	0.795	2.95	7.71	Floral homeotic protein APETALA 2 [Apostasia shenzhenica]	GO:0007275;GO:0006351;GO:0007275;GO:0006351;GO:0007275;GO:0006351;GO:0005634;GO:0005634;GO:0005634;GO:0003677;GO:0003700;GO:0003677;GO:0003700;GO:0003677;GO:0003700	BP:multicellular organism development;BP:transcription, DNA-templated;BP:multicellular organism development;BP:transcription, DNA-templated;BP:multicellular organism development;BP:transcription, DNA-templated;CC:nucleus;CC:nucleus;CC:nucleus;MF:DNA binding;MF:transcription factor activity, sequence-specific DNA binding;MF:DNA binding;MF:transcription factor activity, sequence-specific DNA bindin…	K09284	AP2	------	------	------	------	gi|75264273|sp|Q9LVG2.1|TOE2_ARATH;	RecName: Full=AP2-like ethylene-responsive transcription factor TOE2; AltName: Full=Protein TARGET OF EAT 2;	PF00847.17	AP2	AP2 domain
TRINITY_DN51224_c8_g1	1342	1.975	0.73	0	Long chain base biosynthesis protein 1a [Ananas comosus]	GO:0009058;GO:0009058;GO:0009058;GO:0003824;GO:0030170;GO:0003824;GO:0030170;GO:0003824;GO:0030170	BP:biosynthetic process;BP:biosynthetic process;BP:biosynthetic process;MF:catalytic activity;MF:pyridoxal phosphate binding;MF:catalytic activity;MF:pyridoxal phosphate binding;MF:catalytic activity;MF:pyridoxal phosphate binding;	K00654	SPT	map00600	Sphingolipid metabolism	------	------	gi|75166171|sp|Q94IB8.1|LCB1_ARATH;	RecName: Full=Long chain base biosynthesis protein 1; Short=AtLCB1; AltName: Full=Protein EMBRYO DEFECTIVE 2779; AltName: Full=Protein FUMONISIN B1 RESISTANT 11;	PF00155.18	Aminotran_1_2	Aminotransferase class I and II
TRINITY_DN51239_c0_g1	1498	3.675	1.04	0.495		------	------	------	------	------	------	------	------	------	------	------	------	------
TRINITY_DN51245_c9_g3	885	0.295	3.705	6.445	PREDICTED: dirigent protein 22-like [Vigna angularis]	GO:0048046;GO:0048046;GO:0048046	CC:apoplast;CC:apoplast;CC:apoplast;	------	------	------	------	------	------	gi|75148213|sp|Q84TH6.1|DIR23_ARATH;	RecName: Full=Dirigent protein 23; Short=AtDIR23; Flags: Precursor;	PF03018.11	Dirigent	Dirigent-like protein
TRINITY_DN51314_c2_g1	455	1994.55	1537.61	213.945	17.3 kDa class I heat shock protein-like [Asparagus officinalis]	------	------	K13993	HSP20	map04141	Protein processing in endoplasmic reticulum	------	------	gi|123548|sp|P27396.1|HSP11_DAUCA;	RecName: Full=17.8 kDa class I heat shock protein; AltName: Full=Clone DCHSP17.7;	PF00011.18	HSP20	Hsp20/alpha crystallin family
TRINITY_DN51336_c2_g3	831	0	2.655	8.26		------	------	------	------	------	------	------	------	------	------	------	------	------
TRINITY_DN51351_c0_g1	4363	55.62	12.32	13.63	heat stress transcription factor A-3-like isoform X1 [Asparagus officinalis]	------	------	K09419	HSFF	------	------	------	------	gi|75259113|sp|Q6H6Q7.1|HSFA3_ORYSJ;	RecName: Full=Heat stress transcription factor A-3; AltName: Full=Heat stress transcription factor 7; Short=OsHsf-07;	------	------	------
TRINITY_DN51463_c0_g1	2503	4.31	2.97	0.18	PREDICTED: glycine dehydrogenas	GO:0006546;GO:0006546;GO:0005739;GO:0005739;GO:0004375;GO:0004375	BP:glycine catabolic process;BP:glycine catabolic process;CC:mitochondrion;CC:mitochondrion;MF:glycine dehydrogenas;MF:glycine dehydrogenas;	K00281	GLDC, gcvP	map00630;map00260	Glyoxylate and dicarboxylate metabolism;Glycine, serine and threonine metabolism	------	------	gi|121083|sp|P26969.1|GCSP_PEA;	RecName: Full=Glycine dehydrogenase;	PF02347.13	GDC-P	Glycine cleavage system P-protein
TRINITY_DN51656_c2_g3	1895	7.715	5.93	0.925	PREDICTED: putative 4-coumarate--CoA ligase-like 8 [Elaeis guineensis]	------	------	K10526	OPCL1	map00592	alpha-Linolenic acid metabolism	------	------	gi|75299532|sp|Q8GVF9.1|4CLL8_ORYSJ;	RecName: Full=Putative 4-coumarate--CoA ligase-like 8;	PF00501.25;PF13193.3	AMP-binding;AMP-binding_C	AMP-binding enzyme;AMP-binding enzyme C-terminal domain
TRINITY_DN51680_c2_g1	2509	1.04	0.16	0.045	U-box domain-containing protein 52-like isoform X2 [Ananas comosus]	GO:0006950;GO:0005524;GO:0004672	BP:response to stress;MF:ATP binding;MF:protein kinase activity;	------	------	------	------	------	------	gi|75262617|sp|Q9FKG6.1|PUB52_ARATH;	RecName: Full=U-box domain-containing protein 52; AltName: Full=Plant U-box protein 52; Includes: RecName: Full=E3 ubiquitin ligase; Includes: RecName: Full=Serine/threonine-protein kinase;	PF00069.22;PF07714.14;PF00582.23	Pkinase;Pkinase_Tyr;Usp	Protein kinase domain;Protein tyrosine kinase;Universal stress protein family
TRINITY_DN51680_c3_g1	1952	1.235	2.57	7.105	hypothetical protein VITISV_033385 [Vitis vinifera]	------	------	------	------	------	------	------	------	------	------	------	------	------
TRINITY_DN51683_c5_g1	476	0	0.455	8.29		------	------	------	------	------	------	------	------	------	------	------	------	------
TRINITY_DN51701_c1_g3	1837	0.07	0.115	8.515	organic cation/carnitine transporter 2-like [Asparagus officinalis]	GO:0016021;GO:0022857	CC:integral component of membrane;MF:transmembrane transporter activity;	------	------	------	------	------	------	gi|75219810|sp|O64515.1|OCT2_ARATH;	RecName: Full=Organic cation/carnitine transporter 2; Short=AtOCT2;	PF00083.21;PF07690.13	Sugar_tr;MFS_1	Sugar;Major Facilitator Superfamily
TRINITY_DN51714_c1_g1	2220	13.54	3.18	4.47		------	------	------	------	------	------	------	------	------	------	------	------	------
TRINITY_DN51759_c1_g5	1468	0	9.75	10.14	PREDICTED: 50S ribosomal protein L4-like [Phoenix dactylifera]	GO:0006412;GO:0006412;GO:0006412;GO:0005840;GO:0005840;GO:0005840;GO:0003735;GO:0003735;GO:0003735	BP:translation;BP:translation;BP:translation;CC:ribosome;CC:ribosome;CC:ribosome;MF:structural constituent of ribosome;MF:structural constituent of ribosome;MF:structural constituent of ribosome;	K02926	RP-L4, MRPL4, rplD	map03010	Ribosome	------	------	gi|81599118|sp|Q5PA59.1|RL4_ANAMM;	RecName: Full=50S ribosomal protein L4 >gi|254803710|sp|B9KJ69.1|RL4_ANAMF RecName: Full=50S ribosomal protein L4;	PF00573.19	Ribosomal_L4	Ribosomal protein L4/L1 family
TRINITY_DN51806_c4_g2	1473	0.96	5.015	9.48	PREDICTED: two-component response regulator-like APRR9 isoform X3 [Elaeis guineensis]	GO:0000160;GO:0000160;GO:0005634;GO:0005634	BP:phosphorelay signal transduction system;BP:phosphorelay signal transduction system;CC:nucleus;CC:nucleus;	K12130	PRR5	map04712	Circadian rhythm - plant	------	------	gi|68565887|sp|Q689G6.1|PRR95_ORYSJ;	RecName: Full=Two-component response regulator-like PRR95; AltName: Full=Pseudo-response regulator 95; Short=OsPRR95;	PF06203.11	CCT	CCT motif
TRINITY_DN51806_c4_g4	412	0.165	5.35	23.59	PREDICTED: two-component response regulator-like PRR95 isoform X2 [Phoenix dactylifera]	GO:0000160;GO:0000160;GO:0005634;GO:0005634	BP:phosphorelay signal transduction system;BP:phosphorelay signal transduction system;CC:nucleus;CC:nucleus;	K12130	PRR5	map04712	Circadian rhythm - plant	------	------	gi|68565887|sp|Q689G6.1|PRR95_ORYSJ;	RecName: Full=Two-component response regulator-like PRR95; AltName: Full=Pseudo-response regulator 95; Short=OsPRR95;	PF00072.21	Response_reg	Response regulator receiver domain
TRINITY_DN51829_c6_g1	480	0	4.685	9.95		------	------	------	------	------	------	------	------	------	------	------	------	------
TRINITY_DN51838_c4_g1	1364	0	3.26	6.73	putative F-box protein At1g50870 [Asparagus officinalis]	------	------	------	------	------	------	------	------	------	------	PF08268.9;PF00646.30;PF12937.4	FBA_3;F-box;F-box-like	F-box associated domain;F-box domain;F-box-like
TRINITY_DN51844_c4_g1	3020	13.74	0.08	0.945	PREDICTED: uncharacterized protein LOC103984445 [Musa acuminata subsp. malaccensis]	GO:0016021	CC:integral component of membrane;	------	------	------	------	------	------	------	------	------	------	------
TRINITY_DN51847_c1_g2	984	6.145	5.275	47.78	PREDICTED: geraniol 8-hydroxylase-like [Elaeis guineensis]	GO:0016021;GO:0016021;GO:0020037;GO:0005506;GO:0004497;GO:0016705;GO:0016711;GO:0020037;GO:0005506	CC:integral component of membrane;CC:integral component of membrane;MF:heme binding;MF:iron ion binding;MF:monooxygenase activity;MF:oxidoreductase activity, acting on paired donors, with incorporation or reduction of molecular oxygen;MF:flavonoid 3'-monooxygenase activity;MF:heme binding;MF:iron ion binding;	------	------	------	------	------	------	gi|704000326|sp|S4UX02.1|CYPH1_SALMI;	RecName: Full=Ferruginol synthase; AltName: Full=Cytochrome P450 76AH1;	PF00067.19;PF12678.4;PF13639.3;PF13923.3	p450;zf-rbx1;zf-RING_2;zf-C3HC4_2	Cytochrome P450;RING-H2 zinc finger domain;Ring finger domain;Zinc finger, C3HC4 type
TRINITY_DN51868_c7_g2	934	0.07	1.895	3.36	hypothetical protein ZOSMA_148G00110 [Zostera marina]	GO:0071446;GO:0031347;GO:2000031;GO:0071446;GO:0031347;GO:2000031;GO:0016021;GO:0016021;GO:0016021	BP:cellular response to salicylic acid stimulus;BP:regulation of defense response;BP:regulation of salicylic acid mediated signaling pathway;BP:cellular response to salicylic acid stimulus;BP:regulation of defense response;BP:regulation of salicylic acid mediated signaling pathway;CC:integral component of membrane;CC:integral component of membrane;CC:integral component of membrane;	------	------	------	------	------	------	gi|75308849|sp|Q9C7A2.1|Y3236_ARATH;	RecName: Full=Ankyrin repeat-containing protein At3g12360;	PF13962.3	PGG	Domain of unknown function
TRINITY_DN51892_c4_g1	734	76.555	9.58	8.515	PREDICTED: uncharacterized protein LOC104603393 [Nelumbo nucifera]	------	------	------	------	------	------	------	------	------	------	PF07911.10	DUF1677	Protein of unknown function
TRINITY_DN51894_c2_g5	2647	2.93	0.145	0.185	hypothetical protein AXF42_Ash008478 [Apostasia shenzhenica]	GO:0016021;GO:0016021;GO:0016021;GO:0016021	CC:integral component of membrane;CC:integral component of membrane;CC:integral component of membrane;CC:integral component of membrane;	------	------	------	------	------	------	------	------	------	------	------
TRINITY_DN51952_c0_g3	810	8.81	1.905	0.54	uncharacterized protein LOC109837396 [Asparagus officinalis]	------	------	------	------	------	------	------	------	------	------	------	------	------
TRINITY_DN51965_c0_g1	1078	8.57	0.79	1.55	PREDICTED: small heat shock protein, chloroplastic-like isoform X2 [Elaeis guineensis]	------	------	K13993	HSP20	map04141	Protein processing in endoplasmic reticulum	------	------	gi|123564|sp|P11890.1|HS23C_OXYRB;	RecName: Full=Small heat shock protein, chloroplastic; Flags: Precursor;	PF00011.18	HSP20	Hsp20/alpha crystallin family
TRINITY_DN51972_c2_g5	1165	2.09	0.205	0.095		------	------	------	------	------	------	------	------	------	------	------	------	------
TRINITY_DN52021_c13_g4	1165	16.96	0.16	0.585	PREDICTED: 7-deoxyloganetin glucosyltransferase-like [Musa acuminata subsp. malaccensis]	------	------	K21374	UGT85A	------	------	------	------	gi|678019172|sp|F8WKW1.1|UGT2_GARJA;	RecName: Full=7-deoxyloganetin glucosyltransferase; AltName: Full=Genipin glucosyltransferase; AltName: Full=UDP-glucose glucosyltransferase 2; Short=GjUGT2; AltName: Full=UDP-glycosyltransferase 85A24;	PF00201.15	UDPGT	UDP-glucoronosyl and UDP-glucosyl transferase
TRINITY_DN52061_c1_g2	1387	0.04	4.28	8.235	PREDICTED: receptor-like serine/threonine-protein kinase SD1-8 [Phoenix dactylifera]	GO:0048544;GO:0048544;GO:0016021;GO:0016021;GO:0005524;GO:0004674;GO:0005524;GO:0004674	BP:recognition of pollen;BP:recognition of pollen;CC:integral component of membrane;CC:integral component of membrane;MF:ATP binding;MF:protein serine/threonine kinase activity;MF:ATP binding;MF:protein serine/threonine kinase activity;	------	------	------	------	------	------	gi|75319440|sp|Q39086.1|SD17_ARATH;	RecName: Full=Receptor-like serine/threonine-protein kinase SD1-7; AltName: Full=Arabidopsis thaliana receptor kinase 1; AltName: Full=S-domain-1;	PF07714.14;PF00069.22;PF11883.5	Pkinase_Tyr;Pkinase;DUF3403	Protein tyrosine kinase;Protein kinase domain;Domain of unknown function
TRINITY_DN52063_c1_g1	2796	8.235	0.075	0.23	hypothetical protein VITISV_017285 [Vitis vinifera]	GO:0015074;GO:0015074;GO:0015074;GO:0015074;GO:0003676;GO:0003676;GO:0008270;GO:0003676;GO:0003676	BP:DNA integration;BP:DNA integration;BP:DNA integration;BP:DNA integration;MF:nucleic acid binding;MF:nucleic acid binding;MF:zinc ion binding;MF:nucleic acid binding;MF:nucleic acid binding;	------	------	------	------	------	------	gi|130582|sp|P10978.1|POLX_TOBAC;	RecName: Full=Retrovirus-related Pol polyprotein from transposon TNT 1-94; Includes: RecName: Full=Protease; Includes: RecName: Full=Reverse transcriptase; Includes: RecName: Full=Endonuclease;	PF14223.3;PF00665.23	Retrotran_gag_2;rve	gag-polypeptide of LTR copia-type;Integrase core domain
TRINITY_DN52077_c2_g1	1924	0.055	2.065	6.2		------	------	------	------	------	------	------	------	------	------	------	------	------
TRINITY_DN52084_c4_g2	4006	4.53	12.835	17.1	B-box zinc finger protein 22-like [Ananas comosus]	GO:0005622;GO:0005622;GO:0005622;GO:0008270;GO:0008270;GO:0008270	CC:intracellular;CC:intracellular;CC:intracellular;MF:zinc ion binding;MF:zinc ion binding;MF:zinc ion binding;	------	------	------	------	------	------	gi|52788299|sp|Q9SYM2.2|BBX22_ARATH;	RecName: Full=B-box zinc finger protein 22; AltName: Full=Protein DOUBLE B-BOX 3; AltName: Full=Protein LIGHT-REGULATED ZINC FINGER PROTEIN 1; AltName: Full=Protein SALT TOLERANCE HOMOLOG 3;	------	------	------
TRINITY_DN52093_c4_g4	1207	0	5.695	3.125	Protein trichome birefringence-like 33, partial [Dichanthelium oligosanthes]	GO:0016021;GO:0016021	CC:integral component of membrane;CC:integral component of membrane;	------	------	------	------	------	------	gi|586946307|sp|F4IH21.1|TBL33_ARATH;	RecName: Full=Protein trichome birefringence-like 33;	PF13839.3	PC-Esterase	GDSL/SGNH-like Acyl-Esterase family found in Pmr5 and Cas1p
TRINITY_DN52105_c1_g2	462	0.245	19.145	106.83	PREDICTED: uncharacterized protein LOC105054116 isoform X2 [Elaeis guineensis]	------	------	------	------	------	------	------	------	------	------	------	------	------
TRINITY_DN52203_c2_g1	1868	7.335	0.275	0.825	PREDICTED: receptor-like serine/threonine-protein kinase SD1-8 [Phoenix dactylifera]	GO:0048544;GO:0016021;GO:0005524;GO:0004674	BP:recognition of pollen;CC:integral component of membrane;MF:ATP binding;MF:protein serine/threonine kinase activity;	------	------	------	------	------	------	gi|75318808|sp|O81905.1|SD18_ARATH;	RecName: Full=Receptor-like serine/threonine-protein kinase SD1-8; AltName: Full=Arabidopsis thaliana receptor kinase 3; AltName: Full=S-domain-1;	PF01453.21;PF00954.17;PF08276.8;PF07714.14;PF00069.22	B_lectin;S_locus_glycop;PAN_2;Pkinase_Tyr;Pkinase	D-mannose binding lectin;S-locus glycoprotein domain;PAN-like domain;Protein tyrosine kinase;Protein kinase domain
TRINITY_DN52208_c5_g1	2595	0.1	0.49	1.215		------	------	------	------	------	------	------	------	------	------	------	------	------
TRINITY_DN52239_c0_g3	754	109.57	48.91	21.43	uncharacterized protein LOC109838183 [Asparagus officinalis]	------	------	------	------	------	------	------	------	------	------	PF13431.3	TPR_17	Tetratricopeptide repeat
TRINITY_DN52312_c2_g1	694	86.62	9.435	8.075	PREDICTED: glutathione S-transferase U17-like [Phoenix dactylifera]	GO:0016740;GO:0016740;GO:0016740	MF:transferase activity;MF:transferase activity;MF:transferase activity;	K00799	GST, gst	map00480	Glutathione metabolism	------	------	gi|75334347|sp|Q9FUS9.1|GSTUI_ARATH;	RecName: Full=Glutathione S-transferase U18; Short=AtGSTU18; AltName: Full=GST class-tau member 18; AltName: Full=Glutathione S-transferase 29;	PF00043.22;PF13410.3;PF14497.3	GST_C;GST_C_2;GST_C_3	Glutathione S-transferase, C-terminal domain;Glutathione S-transferase, C-terminal domain;Glutathione S-transferase, C-terminal domain
TRINITY_DN52329_c3_g2	1397	6.355	0.24	0.22		------	------	------	------	------	------	------	------	------	------	------	------	------
TRINITY_DN52346_c2_g1	1072	0.66	15.315	7.125	PREDICTED: uncharacterized protein LOC103977175 isoform X1 [Musa acuminata subsp. malaccensis]	------	------	------	------	------	------	------	------	------	------	------	------	------
TRINITY_DN52391_c2_g4	1952	33.685	5.69	2.275	PREDICTED: protein DETOXIFICATION 49-like [Elaeis guineensis]	GO:0016021;GO:0016021;GO:0015297;GO:0015238;GO:0015297;GO:0015238	CC:integral component of membrane;CC:integral component of membrane;MF:antiporter activity;MF:drug transmembrane transporter activity;MF:antiporter activity;MF:drug transmembrane transporter activity;	K03327	TC.MATE, SLC47A, norM, mdtK, dinF	------	------	------	------	gi|75100778|sp|O82752.1|DTX49_ARATH;	RecName: Full=Protein DETOXIFICATION 49; Short=AtDTX49; AltName: Full=Multidrug and toxic compound extrusion protein 49; Short=MATE protein 49; AltName: Full=Protein NOVEL ION CARRIER 1; Short=Protein NIC1;	PF01554.15	MatE	MatE
TRINITY_DN52417_c2_g4	1452	0.27	10.47	8.28	Leucine-rich repeat extensin-like protein 6 [Ananas comosus]	------	------	------	------	------	------	------	------	gi|75335502|sp|Q9LUI1.1|LRX6_ARATH;	RecName: Full=Leucine-rich repeat extensin-like protein 6; Short=AtLRX6; Short=LRR/EXTENSIN6; AltName: Full=Cell wall hydroxyproline-rich glycoprotein; Flags: Precursor;	PF13855.3;PF12799.4;PF08263.9	LRR_8;LRR_4;LRRNT_2	Leucine rich repeat;Leucine Rich repeats;Leucine rich repeat N-terminal domain
TRINITY_DN52430_c4_g4	438	210.93	47.175	9.67	17.9 kDa class II heat shock protein [Arachis duranensis]	------	------	K13993	HSP20	map04141	Protein processing in endoplasmic reticulum	------	------	gi|123580|sp|P05477.1|HSP21_SOYBN;	RecName: Full=17.9 kDa class II heat shock protein;	PF00011.18	HSP20	Hsp20/alpha crystallin family
TRINITY_DN52462_c1_g5	2133	2.385	0.275	0.1	putative RNA-directed DNA polymerase [Rosa chinensis]	GO:0015074;GO:0003676;GO:0003676;GO:0008270;GO:0003676;GO:0008270	BP:DNA integration;MF:nucleic acid binding;MF:nucleic acid binding;MF:zinc ion binding;MF:nucleic acid binding;MF:zinc ion binding;	------	------	------	------	------	------	gi|130582|sp|P10978.1|POLX_TOBAC;	RecName: Full=Retrovirus-related Pol polyprotein from transposon TNT 1-94; Includes: RecName: Full=Protease; Includes: RecName: Full=Reverse transcriptase; Includes: RecName: Full=Endonuclease;	PF14111.3	DUF4283	Domain of unknown function
TRINITY_DN52523_c3_g3	469	25.485	2.635	0.8		------	------	------	------	------	------	------	------	gi|75334005|sp|Q9FKW4.1|CDPKS_ARATH;	RecName: Full=Calcium-dependent protein kinase 28;	------	------	------
TRINITY_DN52558_c8_g1	770	3.22	4.72	29.95	hypothetical protein ZEAMMB73_Zm00001d028198 [Zea mays]	GO:0006075;GO:0000148;GO:0003843	BP:;CC:1,3-beta-D-glucan synthase complex;MF:1,3-beta-D-glucan synthase activity;	------	------	------	------	------	------	------	------	------	------	------
TRINITY_DN52598_c6_g2	671	0.685	4.38	12.95		------	------	------	------	------	------	------	------	------	------	------	------	------
TRINITY_DN52600_c0_g1	1384	14.735	19.615	183.285	PREDICTED: acyl transferase 5-like [Elaeis guineensis]	GO:0016747;GO:0016747;GO:0016747;GO:0016747	MF:transferase activity, transferring acyl groups other than amino-acyl groups;MF:transferase activity, transferring acyl groups other than amino-acyl groups;MF:transferase activity, transferring acyl groups other than amino-acyl groups;MF:transferase activity, transferring acyl groups other than amino-acyl groups;	------	------	------	------	------	------	gi|28558088|sp|Q8LL69.1|DBNBT_TAXCA;	RecName: Full=3'-N-debenzoyl-2'-deoxytaxol N-benzoyltransferase; Short=DBTNBT [Taxus canadensis];	PF02458.12	Transferase	Transferase family
TRINITY_DN52600_c0_g3	1492	0.055	0.66	2.21	PREDICTED: 3'-N-debenzoyl-2'-deoxytaxol N-benzoyltransferase-like [Phoenix dactylifera]	GO:0016747;GO:0016747	MF:transferase activity, transferring acyl groups other than amino-acyl groups;MF:transferase activity, transferring acyl groups other than amino-acyl groups;	------	------	------	------	------	------	gi|28558099|sp|Q9M6E2.1|DBAT_TAXCU;	RecName: Full=10-deacetylbaccatin III 10-O-acetyltransferase; Short=DBAT;	PF02458.12	Transferase	Transferase family
TRINITY_DN52664_c3_g6	1073	0.415	1.13	7.045	phosphoenolpyruvate carboxylase kinase 1-like [Ananas comosus]	GO:0005524;GO:0004674	MF:ATP binding;MF:protein serine/threonine kinase activity;	------	------	------	------	------	------	gi|75337508|sp|Q9SPK4.1|PPCK1_ARATH;	RecName: Full=Phosphoenolpyruvate carboxylase kinase 1; Short=AtPPCK1;	PF00069.22;PF07714.14;PF14531.3	Pkinase;Pkinase_Tyr;Kinase-like	Protein kinase domain;Protein tyrosine kinase;Kinase-like
TRINITY_DN52673_c7_g1	1090	36.33	2.375	1.935	uncharacterized protein A4U43_C07F11860 [Asparagus officinalis]	GO:0016021;GO:0005524;GO:0042626	CC:integral component of membrane;MF:ATP binding;MF:ATPase activity, coupled to transmembrane movement of substances;	K05658	ABCB1, CD243	map02010	ABC transporters	------	------	gi|75318687|sp|O80725.1|AB4B_ARATH;	RecName: Full=ABC transporter B family member 4; Short=ABC transporter ABCB.4; Short=AtABCB4; AltName: Full=Multidrug resistance protein 4; AltName: Full=P-glycoprotein 4;	PF00664.20	ABC_membrane	ABC transporter transmembrane region
TRINITY_DN52682_c0_g1	1412	25.795	34.535	41.875		------	------	------	------	------	------	------	------	------	------	------	------	------
TRINITY_DN52687_c8_g1	921	68.26	15.83	15.635	annexin D5 [Asparagus officinalis]	GO:0009555;GO:0009846;GO:0009860;GO:0009409;GO:0009408;GO:0009639;GO:0009651;GO:0009414;GO:0009555;GO:0009846;GO:0009860;GO:0009409;GO:0009408;GO:0009639;GO:0009651;GO:0009414;GO:0005509;GO:0005544;GO:0051015;GO:0005509;GO:0005544;GO:0051015;GO:0005509;GO:0005544	BP:pollen development;BP:pollen germination;BP:pollen tube growth;BP:response to cold;BP:response to heat;BP:response to red or far red light;BP:response to salt stress;BP:response to water deprivation;BP:pollen development;BP:pollen germination;BP:pollen tube growth;BP:response to cold;BP:response to heat;BP:response to red or far red light;BP:response to salt stress;BP:response to water depriva…	K17095	ANXA7_11	------	------	------	------	gi|134035062|sp|Q9C9X3.2|ANXD5_ARATH;	RecName: Full=Annexin D5; AltName: Full=AnnAt5;	PF00191.17	Annexin	Annexin
TRINITY_DN52696_c7_g1	1459	1.285	0	0	Retrovirus-related Pol polyprotein from transposon TNT 1-94 [Cajanus cajan]	GO:0015074;GO:0003676;GO:0008270;GO:0016787;GO:0003676;GO:0008270;GO:0003676;GO:0008270	BP:DNA integration;MF:nucleic acid binding;MF:zinc ion binding;MF:hydrolase activity;MF:nucleic acid binding;MF:zinc ion binding;MF:nucleic acid binding;MF:zinc ion binding;	------	------	------	------	------	------	gi|130582|sp|P10978.1|POLX_TOBAC;	RecName: Full=Retrovirus-related Pol polyprotein from transposon TNT 1-94; Includes: RecName: Full=Protease; Includes: RecName: Full=Reverse transcriptase; Includes: RecName: Full=Endonuclease;	------	------	------
TRINITY_DN52734_c4_g1	857	7.245	0.975	0.425		------	------	------	------	------	------	------	------	------	------	------	------	------
TRINITY_DN52793_c7_g1	1312	0.585	3.905	8.34		------	------	------	------	------	------	------	------	gi|75099256|sp|O64896.1|TPPA_ARATH;	RecName: Full=Trehalose-phosphate phosphatase A; Short=AtTPPA; AltName: Full=Trehalose 6-phosphate phosphatase;	------	------	------
TRINITY_DN52814_c3_g1	1444	34.535	0	1.78		------	------	------	------	------	------	------	------	------	------	------	------	------
TRINITY_DN52816_c1_g1	2446	5.455	3.215	0.215	LOW QUALITY PROTEIN: protein MOR1-like [Durio zibethinus]	GO:0006886;GO:0005622	BP:intracellular protein transport;CC:intracellular;	K16803	CKAP5, XMAP215	------	------	------	------	gi|75251094|sp|Q5N749.1|MOR1_ORYSJ;	RecName: Full=Protein MOR1; AltName: Full=Protein GEM1; AltName: Full=Protein MICROTUBULE ORGANIZATION 1;	------	------	------
TRINITY_DN52822_c1_g1	1996	0	0.055	1.255	hypothetical protein PRUPE_5G142000 [Prunus persica]	GO:0003677;GO:0046983;GO:0003677;GO:0046983	MF:DNA binding;MF:protein dimerization activity;MF:DNA binding;MF:protein dimerization activity;	------	------	------	------	------	------	------	------	PF14372.3	DUF4413	Domain of unknown function
TRINITY_DN52824_c8_g1	1205	8.735	24.85	44.4		------	------	------	------	------	------	------	------	------	------	------	------	------
TRINITY_DN52830_c3_g2	1796	45.31	10.905	6.28	PREDICTED: putative serine/threonine-protein kinase isoform X2 [Phoenix dactylifera]	GO:0005524;GO:0004674;GO:0005524;GO:0004674;GO:0005524;GO:0004674	MF:ATP binding;MF:protein serine/threonine kinase activity;MF:ATP binding;MF:protein serine/threonine kinase activity;MF:ATP binding;MF:protein serine/threonine kinase activity;	K04733	IRAK4	------	------	------	------	------	------	------	------	------
TRINITY_DN52830_c3_g6	903	69.265	10.78	7.755	PREDICTED: putative serine/threonine-protein kinase isoform X1 [Phoenix dactylifera]	GO:0005524;GO:0004674;GO:0005524;GO:0004674;GO:0005524;GO:0004674	MF:ATP binding;MF:protein serine/threonine kinase activity;MF:ATP binding;MF:protein serine/threonine kinase activity;MF:ATP binding;MF:protein serine/threonine kinase activity;	K04733	IRAK4	------	------	COG0515	T:Signal transduction mechanisms	gi|263711285|sp|C0LGH2.2|Y1561_ARATH;	RecName: Full=Probable LRR receptor-like serine/threonine-protein kinase At1g56130; Flags: Precursor;	PF07714.14;PF00069.22	Pkinase_Tyr;Pkinase	Protein tyrosine kinase;Protein kinase domain
TRINITY_DN52911_c1_g3	2806	0.035	0.65	1.625	uncharacterized protein LOC111381341 isoform X1 [Olea europaea var. sylvestris]	------	------	------	------	------	------	------	------	------	------	------	------	------
TRINITY_DN52921_c2_g4	892	33.775	12.49	0.17	chloroplast small heat shock protein [Agave americana]	------	------	K13993	HSP20	map04141	Protein processing in endoplasmic reticulum	------	------	gi|232278|sp|P30222.1|HS22C_PETHY;	RecName: Full=Small heat shock protein, chloroplastic; Flags: Precursor;	PF00011.18	HSP20	Hsp20/alpha crystallin family
TRINITY_DN52954_c2_g1	3009	2.37	0.68	0.255		------	------	------	------	------	------	------	------	------	------	------	------	------
TRINITY_DN52974_c2_g1	3318	4.54	1.075	0.725	Ribose-phosphate diphosphokinase [Macleaya cordata]	GO:0009116;GO:0009165;GO:0009156;GO:0016301;GO:0000287;GO:0004749	BP:nucleoside metabolic process;BP:nucleotide biosynthetic process;BP:ribonucleoside monophosphate biosynthetic process;MF:kinase activity;MF:magnesium ion binding;MF:ribose phosphate diphosphokinase activity;	K00948	PRPS, prsA	map00030;map00230	Pentose phosphate pathway;Purine metabolism	------	------	gi|38503403|sp|Q42581.2|KPRS1_ARATH;	RecName: Full=Ribose-phosphate pyrophosphokinase 1, chloroplastic; AltName: Full=PRS I; AltName: Full=Phosphoribosyl pyrophosphate synthase 1; Flags: Precursor;	PF14572.3;PF00156.24	Pribosyl_synth;Pribosyltran	Phosphoribosyl synthetase-associated domain;Phosphoribosyl transferase domain
TRINITY_DN52980_c7_g7	2104	9.115	0.82	0.395	zinc finger MYM-type protein 1-like [Prunus persica]	------	------	------	------	------	------	------	------	------	------	------	------	------
TRINITY_DN52995_c5_g1	1580	2.185	1.335	20.32		------	------	------	------	------	------	------	------	------	------	------	------	------
TRINITY_DN53020_c3_g2	1123	9.01	1.71	0.76		------	------	------	------	------	------	------	------	------	------	------	------	------
TRINITY_DN53035_c6_g1	404	38.425	481.21	477.025	ribulose bisphosphate carboxylase small chain, chloroplastic-like [Asparagus officinalis]	------	------	K01602	rbcS	map00630;map00710	Glyoxylate and dicarboxylate metabolism;Carbon fixation in photosynthetic organisms	COG4451	C:Energy production and conversion	gi|3914574|sp|O22572.1|RBS2_FRIAG;	RecName: Full=Ribulose bisphosphate carboxylase small chain 2, chloroplastic; Short=RuBisCO small subunit 2; Flags: Precursor;	PF00101.17	RuBisCO_small	Ribulose bisphosphate carboxylase, small chain
TRINITY_DN53064_c0_g3	2226	3.955	0.17	0.105		------	------	------	------	------	------	------	------	------	------	------	------	------
TRINITY_DN53069_c2_g3	1829	26.165	4.395	4.345	transmembrane protein 45A [Asparagus officinalis]	GO:0016021;GO:0016021	CC:integral component of membrane;CC:integral component of membrane;	------	------	------	------	------	------	------	------	PF04819.9	DUF716	Family of unknown function
TRINITY_DN53098_c1_g1	907	30.385	95.07	137.68	RING-H2 finger protein ATL74-like [Asparagus officinalis]	GO:0016021;GO:0016021;GO:0016746	CC:integral component of membrane;CC:integral component of membrane;MF:transferase activity, transferring acyl groups;	K19040	ATL76S	------	------	------	------	gi|68565292|sp|Q9FLC6.1|ATL73_ARATH;	RecName: Full=RING-H2 finger protein ATL73; Flags: Precursor;	PF13639.3;PF17123.2;PF13923.3;PF12678.4;PF00097.22;PF14634.3;PF13445.3;PF12861.4;PF13920.3;PF14446.3	zf-RING_2;zf-RING_11;zf-C3HC4_2;zf-rbx1;zf-C3HC4;zf-RING_5;zf-RING_UBOX;zf-ANAPC11;zf-C3HC4_3;Prok-RING_1	Ring finger domain;RING-like zinc finger;Zinc finger, C3HC4 type;RING-H2 zinc finger domain;Zinc finger, C3HC4 type;zinc-RING finger domain;RING-type zinc-finger;Anaphase-promoting complex subunit 11 RING-H2 finger;Zinc finger, C3HC4 type;Prokaryotic RING finger family 1
TRINITY_DN53130_c6_g1	3354	11.47	0.73	1.73	LOW QUALITY PROTEIN: receptor-like protein kinase 5 [Asparagus officinalis]	GO:0016021;GO:0005524;GO:0004674	CC:integral component of membrane;MF:ATP binding;MF:protein serine/threonine kinase activity;	------	------	------	------	------	------	gi|75337207|sp|Q9SGP2.1|HSL1_ARATH;	RecName: Full=Receptor-like protein kinase HSL1; AltName: Full=Protein HAESA-LIKE1; Flags: Precursor;	PF07714.14;PF00069.22;PF13855.3;PF12799.4;PF08263.9	Pkinase_Tyr;Pkinase;LRR_8;LRR_4;LRRNT_2	Protein tyrosine kinase;Protein kinase domain;Leucine rich repeat;Leucine Rich repeats;Leucine rich repeat N-terminal domain
TRINITY_DN53232_c2_g1	1543	1.53	0.045	0.03		------	------	------	------	------	------	------	------	------	------	------	------	------
TRINITY_DN53251_c3_g1	1348	5.37	7.175	79.89	PREDICTED: probable isoaspartyl peptidase/L-asparaginase 2 [Juglans regia]	GO:0016787;GO:0016787;GO:0016787;GO:0016787	MF:hydrolase activity;MF:hydrolase activity;MF:hydrolase activity;MF:hydrolase activity;	K13051	iaaA, ASRGL1	------	------	COG1446	E:Amino acid transport and metabolism	gi|85540956|sp|Q8GXG1.2|ASPGB_ARATH;	RecName: Full=Probable isoaspartyl peptidase/L-asparaginase 2; AltName: Full=L-asparagine amidohydrolase 2; Contains: RecName: Full=Isoaspartyl peptidase/L-asparaginase 2 subunit alpha; Contains: RecName: Full=Isoaspartyl peptidase/L-asparaginase 2 subunit beta; Flags: Precursor;	PF01112.15	Asparaginase_2	Asparaginase
TRINITY_DN53289_c4_g2	2905	126.075	44.895	30.63	PREDICTED: BTB/POZ domain and ankyrin repeat-containing protein NPR1 [Musa acuminata subsp. malaccensis]	------	------	K14508	NPR1	map04075	Plant hormone signal transduction	COG0666	R:General function prediction only	gi|20138944|sp|P93002.1|NPR1_ARATH;	RecName: Full=Regulatory protein NPR1; AltName: Full=BTB/POZ domain-containing protein NPR1; AltName: Full=Non-inducible immunity protein 1; Short=Nim1; AltName: Full=Nonexpresser of PR genes 1; AltName: Full=Salicylic acid insensitive 1; Short=Sai1;	PF12313.5;PF11900.5;PF13637.3;PF00651.28;PF12796.4;PF00023.27;PF13857.3	NPR1_like_C;DUF3420;Ank_4;BTB;Ank_2;Ank;Ank_5	NPR1/NIM1 like defence protein C terminal;Domain of unknown function;Ankyrin repeats;BTB/POZ domain;Ankyrin repeats;Ankyrin repeat;Ankyrin repeats
TRINITY_DN53298_c4_g1	832	0.04	0	3.995		------	------	------	------	------	------	------	------	------	------	------	------	------
TRINITY_DN53305_c7_g3	2087	10.58	1.445	2.04	PREDICTED: probable protein phosphatase 2C 40 isoform X1 [Elaeis guineensis]	GO:0004722	MF:protein serine/threonine phosphatase activity;	------	------	------	------	------	------	gi|75274292|sp|Q9LUS8.1|P2C40_ARATH;	RecName: Full=Probable protein phosphatase 2C 40; Short=AtPP2C40; AltName: Full=Protein phosphatase 2C homolog 1;	PF00481.18	PP2C	Protein phosphatase 2C
TRINITY_DN53313_c13_g1	1093	1.73	6.13	12.865	PREDICTED: SOSS complex subunit B homolog isoform X4 [Phoenix dactylifera]	------	------	------	------	------	------	------	------	gi|74856336|sp|Q54X41.1|SOSSB_DICDI;	RecName: Full=SOSS complex subunit B homolog;	------	------	------
TRINITY_DN53334_c8_g2	1457	41.79	2.59	3.585	uncharacterized protein At1g01500 [Asparagus officinalis]	------	------	------	------	------	------	------	------	gi|75150621|sp|Q8GUH2.1|Y1015_ARATH;	RecName: Full=Uncharacterized protein At1g01500;	------	------	------
TRINITY_DN53345_c2_g5	499	0.225	1.04	15.365	PREDICTED: metallothionein-like protein type 2 isoform X2 [Phoenix dactylifera]	GO:0046872;GO:0046872;GO:0046872;GO:0046872	MF:metal ion binding;MF:metal ion binding;MF:metal ion binding;MF:metal ion binding;	------	------	------	------	------	------	gi|3334260|sp|O22319.2|MT2_MUSAC;	RecName: Full=Metallothionein-like protein type 2;	PF01439.15	Metallothio_2	Metallothionein
TRINITY_DN53345_c2_g7	455	0.265	37.205	65.965	PREDICTED: metallothionein-like protein type 2 isoform X2 [Phoenix dactylifera]	GO:0046872;GO:0046872	MF:metal ion binding;MF:metal ion binding;	------	------	------	------	------	------	gi|122177568|sp|Q19LA2.1|MT2B_COLES;	RecName: Full=Metallothionein type 2b; Short=CeMT2b [Colocasia esculenta];	PF01439.15	Metallothio_2	Metallothionein
TRINITY_DN53415_c3_g10	772	40.885	5.265	2.93	Zinc finger, LSD1-type domain containing protein [Parasponia andersonii]	GO:0016021	CC:integral component of membrane;	------	------	------	------	------	------	gi|75232683|sp|Q7XJE6.1|MCA1_ARATH;	RecName: Full=Metacaspase-1; Short=AtMC1; AltName: Full=Metacaspase 1b; Short=AtMCP1b; AltName: Full=Protein LSD ONE LIKE 3;	------	------	------
TRINITY_DN53437_c4_g4	1909	0.025	1.85	1.38	hypothetical protein VITISV_020318 [Vitis vinifera]	GO:0015074;GO:0015074;GO:0015074;GO:0015074;GO:0005634;GO:0005634;GO:0005634;GO:0005634;GO:0005634;GO:0004190;GO:0003676;GO:0004190;GO:0004190;GO:0003676;GO:0004190;GO:0003676;GO:0003676	BP:DNA integration;BP:DNA integration;BP:DNA integration;BP:DNA integration;CC:nucleus;CC:nucleus;CC:nucleus;CC:nucleus;CC:nucleus;MF:aspartic-type endopeptidase activity;MF:nucleic acid binding;MF:aspartic-type endopeptidase activity;MF:aspartic-type endopeptidase activity;MF:nucleic acid binding;MF:aspartic-type endopeptidase activity;MF:nucleic acid binding;MF:nucleic acid binding;	------	------	------	------	------	------	------	------	------	------	------
TRINITY_DN53451_c3_g1	1287	162.85	30.73	35.74	PREDICTED: multiprotein-bridging factor 1c [Elaeis guineensis]	GO:0043565;GO:0043565	MF:sequence-specific DNA binding;MF:sequence-specific DNA binding;	K03627	MBF1	------	------	COG1813	K:Transcription	gi|75274343|sp|Q9LV58.1|MBF1C_ARATH;	RecName: Full=Multiprotein-bridging factor 1c;	PF08523.7;PF01381.19	MBF1;HTH_3	Multiprotein bridging factor 1;Helix-turn-helix
TRINITY_DN53485_c3_g1	2794	35.905	70.78	144.67	uncharacterized protein A4U43_C08F3870 [Asparagus officinalis]	------	------	------	------	------	------	------	------	gi|75263830|sp|Q9LEX0.1|P2A13_ARATH;	RecName: Full=F-box protein PP2-A13; AltName: Full=Protein PHLOEM PROTEIN 2-LIKE A13; Short=AtPP2-A13; AltName: Full=SKP1-interacting partner 9;	PF14299.3	PP2	Phloem protein 2
TRINITY_DN53525_c4_g1	710	552.87	24.985	62.24	Fatty acid desaturase, type 1, core [Cynara cardunculus var. scolymus]	GO:0006633;GO:0006633;GO:0016021;GO:0016021;GO:0016717;GO:0016717	BP:fatty acid biosynthetic process;BP:fatty acid biosynthetic process;CC:integral component of membrane;CC:integral component of membrane;MF:oxidoreductase activity, acting on paired donors, with oxidation of a pair of donors resulting in the reduction of molecular oxygen to two molecules of water;MF:oxidoreductase activity, acting on paired donors, with oxidation of a pair of donors resulting in…	K20416	FAD5	------	------	------	------	gi|62510457|sp|Q949X0.2|ADS3_ARATH;	RecName: Full=Palmitoyl-monogalactosyldiacylglycerol delta-7 desaturase, chloroplastic; AltName: Full=Acyl-lipid desaturase 3; AltName: Full=Fatty acid desaturase 5; Short=FAD5; AltName: Full=Fatty acid desaturase B; Short=FADB; AltName: Full=Monogalactosyldiacylglycerol-specific palmitic acid desaturase; Flags: Precursor;	------	------	------
TRINITY_DN53530_c2_g5	1869	0.07	0.355	1.23		------	------	------	------	------	------	------	------	------	------	------	------	------
TRINITY_DN53551_c1_g1	1634	4.4	1.61	32.245	Amino acid permease 3 [Ananas comosus]	GO:0016021;GO:0016021	CC:integral component of membrane;CC:integral component of membrane;	------	------	------	------	COG0814	E:Amino acid transport and metabolism	gi|75262385|sp|Q9FF99.1|AAP7_ARATH;	RecName: Full=Probable amino acid permease 7; AltName: Full=Amino acid transporter AAP7;	PF01490.15;PF03222.10	Aa_trans;Trp_Tyr_perm	Transmembrane amino acid transporter protein;Tryptophan/tyrosine permease family
TRINITY_DN53653_c0_g1	2396	1.8	9.3	43.255	PREDICTED: uncharacterized protein LOC105041573 [Elaeis guineensis]	GO:0005975;GO:0005975;GO:0009570;GO:0016868;GO:0016868	BP:carbohydrate metabolic process;BP:carbohydrate metabolic process;CC:chloroplast stroma;MF:intramolecular transferase activity, phosphotransferases;MF:intramolecular transferase activity, phosphotransferases;	------	------	------	------	COG1109	G:Carbohydrate transport and metabolism	gi|33300964|sp|Q88BD4.1|ALGC_PSESM;	RecName: Full=Phosphomannomutase/phosphoglucomutase; Short=PMM / PGM;	PF02878.13;PF02879.13;PF02880.13	PGM_PMM_I;PGM_PMM_II;PGM_PMM_III	Phosphoglucomutase/phosphomannomutase, alpha/beta/alpha domain I;Phosphoglucomutase/phosphomannomutase, alpha/beta/alpha domain II;Phosphoglucomutase/phosphomannomutase, alpha/beta/alpha domain III
TRINITY_DN53659_c5_g2	711	28.195	10.235	3.785	E3 ubiquitin-protein ligase RHA2B-like [Dendrobium catenatum]	GO:0016021;GO:0016021;GO:0016021;GO:0016746	CC:integral component of membrane;CC:integral component of membrane;CC:integral component of membrane;MF:transferase activity, transferring acyl groups;	K16281	RHA1	------	------	------	------	gi|51316538|sp|Q9SUS4.1|RHA1A_ARATH;	RecName: Full=Probable E3 ubiquitin-protein ligase RHA1A; AltName: Full=RING-H2 finger A1a; AltName: Full=RING-H2 zinc finger protein RHA1a;	PF13639.3;PF12678.4;PF13923.3;PF00097.22;PF17120.2;PF17123.2;PF12861.4;PF13445.3;PF14634.3;PF14447.3	zf-RING_2;zf-rbx1;zf-C3HC4_2;zf-C3HC4;Zn_ribbon_17;zf-RING_11;zf-ANAPC11;zf-RING_UBOX;zf-RING_5;Prok-RING_4	Ring finger domain;RING-H2 zinc finger domain;Zinc finger, C3HC4 type;Zinc finger, C3HC4 type;Zinc-ribbon, C4HC2 type;RING-like zinc finger;Anaphase-promoting complex subunit 11 RING-H2 finger;RING-type zinc-finger;zinc-RING finger domain;Prokaryotic RING finger family 4
TRINITY_DN53676_c0_g1	1326	0	1.755	1.54	proline-rich receptor-like protein kinase PERK15 [Asparagus officinalis]	GO:0016021;GO:0005524;GO:0004672	CC:integral component of membrane;MF:ATP binding;MF:protein kinase activity;	------	------	------	------	------	------	gi|75330719|sp|Q8RWW0.1|ALE2_ARATH;	RecName: Full=Receptor-like serine/threonine-protein kinase ALE2; AltName: Full=Protein ABNORMAL LEAF SHAPE 2; Flags: Precursor;	PF14392.3	zf-CCHC_4	Zinc knuckle
TRINITY_DN53699_c6_g1	1867	3.325	0.315	0.435	hypothetical protein GOBAR_DD06575 [Gossypium barbadense]	GO:0015074;GO:0015074;GO:0015074;GO:0003676;GO:0008270;GO:0003676;GO:0008270;GO:0003676;GO:0008270	BP:DNA integration;BP:DNA integration;BP:DNA integration;MF:nucleic acid binding;MF:zinc ion binding;MF:nucleic acid binding;MF:zinc ion binding;MF:nucleic acid binding;MF:zinc ion binding;	------	------	------	------	------	------	gi|130582|sp|P10978.1|POLX_TOBAC;	RecName: Full=Retrovirus-related Pol polyprotein from transposon TNT 1-94; Includes: RecName: Full=Protease; Includes: RecName: Full=Reverse transcriptase; Includes: RecName: Full=Endonuclease;	------	------	------
TRINITY_DN53704_c3_g1	337	191.51	50.215	33.355		------	------	------	------	------	------	------	------	------	------	------	------	------
TRINITY_DN53716_c0_g2	1524	1.005	0.125	0		------	------	------	------	------	------	------	------	------	------	------	------	------
TRINITY_DN53736_c1_g1	1948	3.6	0.475	0.075	PREDICTED: peptide-N4	------	------	------	------	------	------	------	------	gi|56405352|sp|P81898.2|PNAA_PRUDU;	RecName: Full=Peptide-N4;	PF12222.5	PNGaseA	Peptide N-acetyl-beta-D-glucosaminyl asparaginase amidase A
TRINITY_DN53824_c1_g1	2640	44.67	8.09	10.375	aspartic proteinase-like protein 2 [Asparagus officinalis]	GO:0016021;GO:0004190	CC:integral component of membrane;MF:aspartic-type endopeptidase activity;	K00924	E2.7.1.-	------	------	------	------	------	------	------	------	------
TRINITY_DN53825_c3_g2	793	100.865	9.37	22.085	PREDICTED: ABC transporter B family member 21-like [Elaeis guineensis]	GO:0016021;GO:0005524;GO:0042626	CC:integral component of membrane;MF:ATP binding;MF:ATPase activity, coupled to transmembrane movement of substances;	K05658	ABCB1, CD243	map02010	ABC transporters	------	------	gi|75334433|sp|Q9FWX7.1|AB11B_ARATH;	RecName: Full=ABC transporter B family member 11; Short=ABC transporter ABCB.11; Short=AtABCB11; AltName: Full=Multidrug resistance protein 8; AltName: Full=P-glycoprotein 11;	PF00664.20;PF00005.24;PF13555.3;PF13191.3	ABC_membrane;ABC_tran;AAA_29;AAA_16	ABC transporter transmembrane region;ABC transporter;P-loop containing region of AAA domain;AAA ATPase domain
TRINITY_DN53828_c7_g1	822	48.045	26.215	1.97	citrate-binding protein-like [Asparagus officinalis]	------	------	------	------	------	------	------	------	gi|32363139|sp|Q39962.1|CBPR_HEVBR;	RecName: Full=Citrate-binding protein; Flags: Precursor [Hevea brasiliensis];	PF08787.8	Alginate_lyase2	Alginate lyase
TRINITY_DN53840_c2_g3	1221	137.35	22.15	19.105	PREDICTED: cyanidin 3-O-rutinoside 5-O-glucosyltransferase-like [Musa acuminata subsp. malaccensis]	GO:0008152;GO:0008152;GO:0008152;GO:0016758;GO:0016758;GO:0016758	BP:metabolic process;BP:metabolic process;BP:metabolic process;MF:transferase activity, transferring hexosyl groups;MF:transferase activity, transferring hexosyl groups;MF:transferase activity, transferring hexosyl groups;	K21371	UGT75L6, UGTCs2	------	------	------	------	gi|75295189|sp|Q767C8.1|IH5GT_IRIHO;	RecName: Full=Cyanidin 3-O-rutinoside 5-O-glucosyltransferase; Short=Ih5GT; AltName: Full=Anthocyanin 5-O-glucosyltransferase; AltName: Full=Cyanidin-3-rhamnosylglucoside 5-O-glucosyltransferase; AltName: Full=Uridine diphosphoglucose-cyanidin 3-rhamnosylglucoside 5-O-glucosyltransferase [Iris x hollandica];	------	------	------
TRINITY_DN53855_c0_g4	644	48.82	2.9	0	LOW QUALITY PROTEIN: receptor kinase-like protein Xa21 [Asparagus officinalis]	GO:0016021;GO:0016021;GO:0005524;GO:0004674;GO:0005524;GO:0004674	CC:integral component of membrane;CC:integral component of membrane;MF:ATP binding;MF:protein serine/threonine kinase activity;MF:ATP binding;MF:protein serine/threonine kinase activity;	------	------	------	------	------	------	gi|263419078|sp|C0LGT6.1|EFR_ARATH;	RecName: Full=LRR receptor-like serine/threonine-protein kinase EFR; AltName: Full=Elongation factor Tu receptor; Short=EF-Tu receptor; Flags: Precursor;	PF13855.3	LRR_8	Leucine rich repeat
TRINITY_DN53858_c3_g1	830	5.565	59.6	78.235	hypothetical protein GQ55_8G167900 [Panicum hallii var. hallii]	------	------	------	------	------	------	------	------	------	------	------	------	------
TRINITY_DN53870_c5_g9	742	5.08	39.235	82.65	hypothetical protein AQUCO_00300109v1 [Aquilegia coerulea]	------	------	------	------	------	------	------	------	------	------	PF08137.9	DVL	DVL family
TRINITY_DN53889_c1_g6	2312	38.77	2.485	1.895	PREDICTED: probable protein phosphatase 2C 78 [Musa acuminata subsp. malaccensis]	GO:0046872;GO:0004722;GO:0046872;GO:0004722;GO:0046872;GO:0004722	MF:metal ion binding;MF:protein serine/threonine phosphatase activity;MF:metal ion binding;MF:protein serine/threonine phosphatase activity;MF:metal ion binding;MF:protein serine/threonine phosphatase activity;	K01102	PDP	------	------	------	------	gi|75279001|sp|O81760.1|P2C63_ARATH;	RecName: Full=Probable protein phosphatase 2C 63; Short=AtPP2C63;	PF00481.18	PP2C	Protein phosphatase 2C
TRINITY_DN53904_c7_g2	401	8.315	104.53	156.87		------	------	------	------	------	------	------	------	------	------	------	------	------
TRINITY_DN53906_c2_g1	2429	14.49	31.41	61.655	PREDICTED: DEAD-box ATP-dependent RNA helicase 53-like [Phoenix dactylifera]	GO:0005524;GO:0004386;GO:0003676	MF:ATP binding;MF:helicase activity;MF:nucleic acid binding;	------	------	------	------	COG0513	L:Replication, recombination and repair	gi|75335516|sp|Q9LUW5.1|RH53_ARATH;	RecName: Full=DEAD-box ATP-dependent RNA helicase 53;	PF00270.26;PF00271.28;PF04851.12;PF14617.3	DEAD;Helicase_C;ResIII;CMS1	DEAD/DEAH box helicase;Helicase conserved C-terminal domain;Type III restriction enzyme, res subunit;U3-containing 90S pre-ribosomal complex subunit
TRINITY_DN53907_c2_g6	1349	0.84	0.5	11.29	PREDICTED: anthranilate O-methyltransferase 1 [Elaeis guineensis]	GO:0008168;GO:0008168	MF:methyltransferase activity;MF:methyltransferase activity;	K21485	AAMT	------	------	------	------	gi|550600187|sp|B6SU46.1|AAMT2_MAIZE;	RecName: Full=Anthranilate O-methyltransferase 2; AltName: Full=Anthranilic acid methyltransferase 2; AltName: Full=Benzoate carboxyl methyltransferase; AltName: Full=O-methyltransferase 2;	PF03492.12	Methyltransf_7	SAM dependent carboxyl methyltransferase
TRINITY_DN53979_c0_g1	1548	25.765	67.585	150.36	PREDICTED: high-affinity nitrate transporter-activating protein 2.1 [Elaeis guineensis]	GO:0015706;GO:0010167;GO:0015706;GO:0010167;GO:0015706;GO:0010167;GO:0016021;GO:0016021;GO:0016021	BP:nitrate transport;BP:response to nitrate;BP:nitrate transport;BP:response to nitrate;BP:nitrate transport;BP:response to nitrate;CC:integral component of membrane;CC:integral component of membrane;CC:integral component of membrane;	------	------	------	------	------	------	gi|75135979|sp|Q6ZI50.1|NAR21_ORYSJ;	RecName: Full=High-affinity nitrate transporter-activating protein 2.1; Short=OsNAR2.1; Flags: Precursor;	------	------	------
TRINITY_DN54035_c4_g2	1621	2.055	1.265	0.045	PREDICTED: uncharacterized protein LOC109173561 [Ipomoea nil]	GO:0003676;GO:0004523	MF:nucleic acid binding;MF:RNA-DNA hybrid ribonuclease activity;	------	------	------	------	------	------	------	------	------	------	------
TRINITY_DN54144_c8_g4	1399	0	0.055	1.36		------	------	------	------	------	------	------	------	------	------	------	------	------
TRINITY_DN54170_c2_g5	498	12.38	133.5	167.165	auxin-responsive protein IAA27 [Morus notabilis]	GO:0009734;GO:0006355;GO:0006351;GO:0009734;GO:0006355;GO:0006351;GO:0005634;GO:0005634	BP:auxin-activated signaling pathway;BP:regulation of transcription, DNA-templated;BP:transcription, DNA-templated;BP:auxin-activated signaling pathway;BP:regulation of transcription, DNA-templated;BP:transcription, DNA-templated;CC:nucleus;CC:nucleus;	K14484	IAA	map04075	Plant hormone signal transduction	------	------	gi|75226278|sp|Q75GB1.1|IAA17_ORYSJ;	RecName: Full=Auxin-responsive protein IAA17; AltName: Full=Indoleacetic acid-induced protein 17;	------	------	------
TRINITY_DN54282_c0_g1	1202	34.595	9.725	4.935		------	------	------	------	------	------	------	------	------	------	------	------	------
TRINITY_DN54287_c2_g2	692	0	2.005	3.4		------	------	------	------	------	------	------	------	------	------	------	------	------
TRINITY_DN54295_c1_g1	460	166.67	11.805	27.455	PREDICTED: uncharacterized protein LOC103722155 [Phoenix dactylifera]	GO:0016021;GO:0016021;GO:0016021;GO:0016021	CC:integral component of membrane;CC:integral component of membrane;CC:integral component of membrane;CC:integral component of membrane;	------	------	------	------	------	------	------	------	------	------	------
TRINITY_DN54302_c0_g1	1197	10.82	2.515	1.81	putative aldo-keto reductase 3 [Quercus suber]	------	------	------	------	------	------	------	------	gi|122240966|sp|Q0JE32.1|AKR1_ORYSJ;	RecName: Full=Probable aldo-keto reductase 1 >gi|378548316|sp|B8ASB2.2|AKR1_ORYSI RecName: Full=Probable aldo-keto reductase 1;	------	------	------
TRINITY_DN54337_c1_g4	340	66.585	21.01	6.275	hypothetical protein GOBAR_AA15858 [Gossypium barbadense]	GO:0009846;GO:0030163;GO:0005509;GO:0005509;GO:0005509	BP:pollen germination;BP:protein catabolic process;MF:calcium ion binding;MF:calcium ion binding;MF:calcium ion binding;	K02183	CALM	map04070;map04016;map04626	Phosphatidylinositol signaling system;MAPK signaling pathway - plant;Plant-pathogen interaction	------	------	gi|115492|sp|P27164.2|CALM3_PETHY;	RecName: Full=Calmodulin-related protein;	PF00036.29;PF13405.3;PF13202.3	EF-hand_1;EF-hand_6;EF-hand_5	EF hand;EF-hand domain;EF hand
TRINITY_DN54403_c1_g1	2352	65.23	20.705	16.5	PREDICTED: rust resistance kinase Lr10 [Elaeis guineensis]	GO:0005524;GO:0004674	MF:ATP binding;MF:protein serine/threonine kinase activity;	K04733	IRAK4	------	------	COG0515	T:Signal transduction mechanisms	gi|75338636|sp|Q9XID3.1|Y1343_ARATH;	RecName: Full=G-type lectin S-receptor-like serine/threonine-protein kinase At1g34300; Flags: Precursor;	PF07714.14;PF00069.22;PF03109.13	Pkinase_Tyr;Pkinase;ABC1	Protein tyrosine kinase;Protein kinase domain;ABC1 family
TRINITY_DN54403_c1_g3	1434	0.505	4.165	15.48	PREDICTED: rust resistance kinase Lr10-like [Phoenix dactylifera]	GO:0005524;GO:0004674	MF:ATP binding;MF:protein serine/threonine kinase activity;	K04733	IRAK4	------	------	COG0515	T:Signal transduction mechanisms	gi|75338636|sp|Q9XID3.1|Y1343_ARATH;	RecName: Full=G-type lectin S-receptor-like serine/threonine-protein kinase At1g34300; Flags: Precursor;	PF07714.14;PF00069.22;PF03109.13	Pkinase_Tyr;Pkinase;ABC1	Protein tyrosine kinase;Protein kinase domain;ABC1 family
TRINITY_DN54405_c6_g1	800	127.315	46.49	28.51	PREDICTED: uncharacterized protein LOC105057780 [Elaeis guineensis]	------	------	------	------	------	------	------	------	------	------	------	------	------
TRINITY_DN54449_c1_g2	3017	9.78	1.07	0.685	PREDICTED: glutamate receptor 2.8-like [Elaeis guineensis]	GO:0016021;GO:0004970	CC:integral component of membrane;MF:ionotropic glutamate receptor activity;	K05387	GRIP	------	------	------	------	gi|41017226|sp|Q9C5V5.2|GLR28_ARATH;	RecName: Full=Glutamate receptor 2.8; AltName: Full=Ligand-gated ion channel 2.8; Flags: Precursor;	PF01094.25;PF00060.23;PF00497.17;PF13458.3;PF10613.6	ANF_receptor;Lig_chan;SBP_bac_3;Peripla_BP_6;Lig_chan-Glu_bd	Receptor family ligand binding region;Ligand-gated ion channel;Bacterial extracellular solute-binding proteins, family 3;Periplasmic binding protein;Ligated ion channel L-glutamate- and glycine-binding site
TRINITY_DN54453_c0_g2	2365	57.225	19.8	6.955	PREDICTED: protein STRUBBELIG-RECEPTOR FAMILY 6-like [Phoenix dactylifera]	GO:0016021;GO:0016021;GO:0016021;GO:0016021;GO:0016021;GO:0005524;GO:0004672;GO:0005524;GO:0004672;GO:0005524;GO:0004672;GO:0005524;GO:0004672;GO:0005524;GO:0004672	CC:integral component of membrane;CC:integral component of membrane;CC:integral component of membrane;CC:integral component of membrane;CC:integral component of membrane;MF:ATP binding;MF:protein kinase activity;MF:ATP binding;MF:protein kinase activity;MF:ATP binding;MF:protein kinase activity;MF:ATP binding;MF:protein kinase activity;MF:ATP binding;MF:protein kinase activity;	------	------	------	------	------	------	gi|75333531|sp|Q9C8M9.1|SRF6_ARATH;	RecName: Full=Protein STRUBBELIG-RECEPTOR FAMILY 6; AltName: Full=Leucine-rich repeat receptor kinase-like protein SRF6; Flags: Precursor;	PF08263.9	LRRNT_2	Leucine rich repeat N-terminal domain
TRINITY_DN54455_c5_g1	2417	2.92	1.3	0.295	kinesin-like protein KIN-UA [Asparagus officinalis]	GO:0007018;GO:0032886;GO:0048364;GO:0007018;GO:0032886;GO:0048364;GO:0005874;GO:0005874;GO:0005524;GO:0008017;GO:0003777;GO:0005524;GO:0008017;GO:0003777	BP:microtubule-based movement;BP:regulation of microtubule-based process;BP:root development;BP:microtubule-based movement;BP:regulation of microtubule-based process;BP:root development;CC:microtubule;CC:microtubule;MF:ATP binding;MF:microtubule binding;MF:microtubule motor activity;MF:ATP binding;MF:microtubule binding;MF:microtubule motor activity;	------	------	------	------	COG5059	Z:Cytoskeleton	gi|206557943|sp|Q0DV28.2|ARK1_ORYSJ;	RecName: Full=Armadillo repeat-containing kinesin-like protein 1;	PF00225.20;PF16796.2;PF00514.20	Kinesin;Microtub_bd;Arm	Kinesin motor domain;Microtubule binding;Armadillo/beta-catenin-like repeat
TRINITY_DN54456_c2_g7	712	17.095	1.405	1.105		------	------	------	------	------	------	------	------	------	------	------	------	------
TRINITY_DN54554_c2_g4	1132	10.335	1.095	0.17	PREDICTED: probable receptor-like protein kinase At5g39030 [Oryza sativa Japonica Group]	GO:0016021;GO:0016021;GO:0005524;GO:0004672;GO:0005524;GO:0004672;GO:0005524;GO:0004672;GO:0005524;GO:0004672	CC:integral component of membrane;CC:integral component of membrane;MF:ATP binding;MF:protein kinase activity;MF:ATP binding;MF:protein kinase activity;MF:ATP binding;MF:protein kinase activity;MF:ATP binding;MF:protein kinase activity;	------	------	------	------	------	------	------	------	PF13947.3	GUB_WAK_bind	Wall-associated receptor kinase galacturonan-binding
TRINITY_DN54563_c3_g3	1388	0	0.585	2.135		------	------	------	------	------	------	------	------	------	------	------	------	------
TRINITY_DN54591_c2_g1	571	3.41	71.26	28.79	PREDICTED: alkane hydroxylase MAH1-like [Phoenix dactylifera]	GO:0020037;GO:0005506;GO:0004497;GO:0016705	MF:heme binding;MF:iron ion binding;MF:monooxygenase activity;MF:oxidoreductase activity, acting on paired donors, with incorporation or reduction of molecular oxygen;	------	------	------	------	------	------	gi|75309839|sp|Q9FVS9.1|C96AF_ARATH;	RecName: Full=Alkane hydroxylase MAH1; AltName: Full=Cytochrome P450 96A15; AltName: Full=Protein MID-CHAIN ALKANE HYDROXYLASE 1;	PF00067.19	p450	Cytochrome P450
TRINITY_DN54591_c3_g8	1150	0	0.21	2.295	LOW QUALITY PROTEIN: cytochrome P450 86A1-like [Asparagus officinalis]	GO:0016021;GO:0016021;GO:0020037;GO:0005506;GO:0004497;GO:0016705;GO:0020037;GO:0005506;GO:0004497;GO:0016705	CC:integral component of membrane;CC:integral component of membrane;MF:heme binding;MF:iron ion binding;MF:monooxygenase activity;MF:oxidoreductase activity, acting on paired donors, with incorporation or reduction of molecular oxygen;MF:heme binding;MF:iron ion binding;MF:monooxygenase activity;MF:oxidoreductase activity, acting on paired donors, with incorporation or reduction of molecular oxyg…	K15401	CYP86A1	map00073	Cutin, suberine and wax biosynthesis	COG2124	Q:Secondary metabolites biosynthesis, transport and catabolism	gi|13878905|sp|P48422.2|C86A1_ARATH;	RecName: Full=Cytochrome P450 86A1; AltName: Full=CYPLXXXVI; AltName: Full=P450-dependent fatty acid omega-hydroxylase; AltName: Full=Protein HYDROXYLASE OF ROOT SUBERIZED TISSUE;	PF00067.19	p450	Cytochrome P450
TRINITY_DN54636_c3_g1	1490	55.225	37.69	13.955	probable serine/threonine-protein kinase PBL19 [Asparagus officinalis]	GO:0005524;GO:0004674	MF:ATP binding;MF:protein serine/threonine kinase activity;	------	------	------	------	------	------	gi|75335460|sp|Q9LTC0.1|Y5707_ARATH;	RecName: Full=Probable receptor-like protein kinase At5g47070;	PF07714.14;PF00069.22	Pkinase_Tyr;Pkinase	Protein tyrosine kinase;Protein kinase domain
TRINITY_DN54676_c2_g2	534	0	4.62	26.115		------	------	------	------	------	------	------	------	------	------	------	------	------
TRINITY_DN54676_c3_g3	1349	372.58	35.895	35.53		------	------	------	------	------	------	------	------	------	------	------	------	------
TRINITY_DN54707_c1_g1	2178	45.35	1.48	3.12	zeaxanthin epoxidase [Gladiolus x hybridus]	GO:0071949	MF:FAD binding;	------	------	------	------	COG0654;COG0654	C:Energy production and conversion;H:Coenzyme transport and metabolism	gi|403399425|sp|B6D1N4.1|HPXO_KLEPN;	RecName: Full=FAD-dependent urate hydroxylase;	PF01494.16;PF05834.9;PF00890.21;PF01266.21;PF07992.11;PF13450.3;PF01946.14	FAD_binding_3;Lycopene_cycl;FAD_binding_2;DAO;Pyr_redox_2;NAD_binding_8;Thi4	FAD binding domain;Lycopene cyclase protein;FAD binding domain;FAD dependent oxidoreductase;Pyridine nucleotide-disulphide oxidoreductase;NA;Thi4 family
TRINITY_DN54711_c2_g2	1720	0.7	19.35	5.51	PREDICTED: HMG-Y-related protein A-like [Musa acuminata subsp. malaccensis]	GO:0006334;GO:0000786;GO:0005634;GO:0003677	BP:nucleosome assembly;CC:nucleosome;CC:nucleus;MF:DNA binding;	------	------	------	------	------	------	gi|1708099|sp|P54671.3|H1_DICDI;	RecName: Full=Histone H1;	PF00538.16	Linker_histone	linker histone H1 and H5 family
TRINITY_DN54758_c1_g3	1018	1.77	0.025	0		------	------	------	------	------	------	------	------	------	------	------	------	------
TRINITY_DN54765_c3_g1	1099	7.17	1.4	0.685		------	------	------	------	------	------	------	------	------	------	------	------	------
TRINITY_DN54776_c1_g4	738	0.05	0.355	6.09		------	------	------	------	------	------	------	------	------	------	------	------	------
TRINITY_DN54777_c0_g1	1073	0.92	0.915	9.14	PREDICTED: cationic peroxidase 1-like [Phoenix dactylifera]	GO:0042744;GO:0006979;GO:0042744;GO:0006979;GO:0005576;GO:0005576;GO:0020037;GO:0046872;GO:0004601;GO:0020037;GO:0046872;GO:0004601	BP:hydrogen peroxide catabolic process;BP:response to oxidative stress;BP:hydrogen peroxide catabolic process;BP:response to oxidative stress;CC:extracellular region;CC:extracellular region;MF:heme binding;MF:metal ion binding;MF:peroxidase activity;MF:heme binding;MF:metal ion binding;MF:peroxidase activity;	K00430	E1.11.1.7	map00940	Phenylpropanoid biosynthesis	------	------	gi|6093671|sp|P22195.2|PER1_ARAHY;	RecName: Full=Cationic peroxidase 1; AltName: Full=PNPC1; Flags: Precursor;	PF00141.20	peroxidase	Peroxidase
TRINITY_DN54780_c2_g5	925	54.47	10.71	2.73	PREDICTED: small heat shock protein, chloroplastic-like [Musa acuminata subsp. malaccensis]	------	------	K13993	HSP20	map04141	Protein processing in endoplasmic reticulum	------	------	gi|399938|sp|P31170.1|HS25P_ARATH;	RecName: Full=25.3 kDa heat shock protein, chloroplastic; Short=AtHsp25.3; Flags: Precursor;	PF00011.18	HSP20	Hsp20/alpha crystallin family
TRINITY_DN54791_c0_g1	3352	2.63	0.495	0.345	uncharacterized protein LOC109824181 [Asparagus officinalis]	------	------	------	------	------	------	------	------	------	------	PF04782.9;PF04783.9	DUF632;DUF630	Protein of unknown function;Protein of unknown function
TRINITY_DN54829_c2_g4	369	38.885	63.62	177.355		------	------	------	------	------	------	------	------	------	------	------	------	------
TRINITY_DN54841_c4_g3	2760	2.515	0.175	0		------	------	------	------	------	------	------	------	------	------	------	------	------
TRINITY_DN54872_c5_g1	1883	0.345	0.37	3.035		------	------	------	------	------	------	------	------	------	------	------	------	------
TRINITY_DN54895_c8_g1	658	22.675	0	0.28	probable mitochondrial-processing peptidase subunit beta, mitochondrial [Ananas comosus]	GO:0046872;GO:0004222	MF:metal ion binding;MF:metalloendopeptidase activity;	------	------	------	------	------	------	------	------	------	------	------
TRINITY_DN54898_c2_g1	1595	24.97	6.115	2.685		------	------	------	------	------	------	------	------	------	------	------	------	------
TRINITY_DN54907_c1_g2	2561	317.685	26.5	35	LOW QUALITY PROTEIN: arginine decarboxylase-like [Phalaenopsis equestris]	GO:0006527;GO:0008295;GO:0006527;GO:0008295;GO:0006527;GO:0008295;GO:0008792;GO:0008792;GO:0008792	BP:arginine catabolic process;BP:spermidine biosynthetic process;BP:arginine catabolic process;BP:spermidine biosynthetic process;BP:arginine catabolic process;BP:spermidine biosynthetic process;MF:arginine decarboxylase activity;MF:arginine decarboxylase activity;MF:arginine decarboxylase activity;	K01583	E4.1.1.19	map00330	Arginine and proline metabolism	COG1166	E:Amino acid transport and metabolism	gi|3914997|sp|Q43075.1|SPE1_PEA;	RecName: Full=Arginine decarboxylase; Short=ADC; Short=ARGDC;	PF02784.13;PF00278.19	Orn_Arg_deC_N;Orn_DAP_Arg_deC	Pyridoxal-dependent decarboxylase, pyridoxal binding domain;Pyridoxal-dependent decarboxylase, C-terminal sheet domain
TRINITY_DN54908_c6_g1	900	13.615	6.385	1.81	uncharacterized protein LOC101785244 [Setaria italica]	GO:0004185;GO:0004185	MF:serine-type carboxypeptidase activity;MF:serine-type carboxypeptidase activity;	K16297	SCPL-II	------	------	------	------	gi|125987776|sp|O82229.2|SCP23_ARATH;	RecName: Full=Putative serine carboxypeptidase-like 23; Flags: Precursor;	PF00450.19	Peptidase_S10	Serine carboxypeptidase
TRINITY_DN54994_c3_g1	563	0	2.18	7.48		------	------	------	------	------	------	------	------	------	------	------	------	------
TRINITY_DN55039_c3_g1	1800	55.02	1.705	0.39	LEAF RUST 10 DISEASE-RESISTANCE LOCUS RECEPTOR-LIKE PROTEIN KINASE-like 1.2 isoform X3 [Asparagus officinalis]	GO:0016021;GO:0005524;GO:0004674	CC:integral component of membrane;MF:ATP binding;MF:protein serine/threonine kinase activity;	K04733	IRAK4	------	------	------	------	gi|1018447392|sp|P0C5E2.3|LRL12_ARATH;	RecName: Full=LEAF RUST 10 DISEASE-RESISTANCE LOCUS RECEPTOR-LIKE PROTEIN KINASE-like 1.2; AltName: Full=Probable receptor-like serine/threonine-protein kinase LRK10L-1.2; Flags: Precursor;	------	------	------
TRINITY_DN55067_c1_g3	744	69.505	9.325	10.165	PREDICTED: 3-ketoacyl-CoA synthase 4-like [Ziziphus jujuba]	GO:0006633;GO:0006633;GO:0006633;GO:0016021;GO:0016021;GO:0016021;GO:0016747;GO:0016747;GO:0016747	BP:fatty acid biosynthetic process;BP:fatty acid biosynthetic process;BP:fatty acid biosynthetic process;CC:integral component of membrane;CC:integral component of membrane;CC:integral component of membrane;MF:transferase activity, transferring acyl groups other than amino-acyl groups;MF:transferase activity, transferring acyl groups other than amino-acyl groups;MF:transferase activity, transferr…	K15397	KCS	map00062	Fatty acid elongation	------	------	gi|75311386|sp|Q9LN49.1|KCS4_ARATH;	RecName: Full=3-ketoacyl-CoA synthase 4; Short=KCS-4; AltName: Full=Very long-chain fatty acid condensing enzyme 4; Short=VLCFA condensing enzyme 4;	PF08392.9	FAE1_CUT1_RppA	FAE1/Type III polyketide synthase-like protein
TRINITY_DN55078_c3_g5	406	2.245	9.54	25.42	hypothetical protein AQUCO_00400317v1 [Aquilegia coerulea]	GO:0042254;GO:0042254;GO:0042254;GO:0034059;GO:0042254;GO:0005840;GO:0005840;GO:0005840;GO:0022625;GO:0044877;GO:0003735	BP:ribosome biogenesis;BP:ribosome biogenesis;BP:ribosome biogenesis;BP:response to anoxia;BP:ribosome biogenesis;CC:ribosome;CC:ribosome;CC:ribosome;CC:cytosolic large ribosomal subunit;MF:macromolecular complex binding;MF:structural constituent of ribosome;	K02941	RP-LP0, RPLP0	map03010	Ribosome	------	------	gi|6094102|sp|O24573.3|RLA0_MAIZE;	RecName: Full=60S acidic ribosomal protein P0;	PF00428.16	Ribosomal_60s	60s Acidic ribosomal protein
TRINITY_DN55098_c7_g1	1660	115.71	45.925	22.18	ferritin-4, chloroplastic-like [Asparagus officinalis]	GO:0006879;GO:0006826;GO:0006879;GO:0006826;GO:0006879;GO:0006826;GO:0005623;GO:0005623;GO:0005623;GO:0008199;GO:0004322;GO:0008199;GO:0004322;GO:0008199;GO:0004322	BP:cellular iron ion homeostasis;BP:iron ion transport;BP:cellular iron ion homeostasis;BP:iron ion transport;BP:cellular iron ion homeostasis;BP:iron ion transport;CC:cell;CC:cell;CC:cell;MF:ferric iron binding;MF:ferroxidase activity;MF:ferric iron binding;MF:ferroxidase activity;MF:ferric iron binding;MF:ferroxidase activity;	K00522	FTH1	------	------	COG1528	P:Inorganic ion transport and metabolism	gi|29839387|sp|Q948P6.1|FRI3_SOYBN;	RecName: Full=Ferritin-3, chloroplastic; AltName: Full=SFerH-3; Flags: Precursor;	PF00210.21;PF12590.5	Ferritin;Acyl-thio_N	Ferritin-like domain;Acyl-ATP thioesterase
TRINITY_DN55140_c5_g1	1165	2.455	0.09	0.045		------	------	------	------	------	------	------	------	------	------	------	------	------
TRINITY_DN55142_c0_g1	1812	17.7	3.93	3	PREDICTED: uncharacterized protein LOC103970877 [Musa acuminata subsp. malaccensis]	------	------	------	------	------	------	------	------	gi|75315914|sp|Q9ZU96.1|Y2168_ARATH;	RecName: Full=Ankyrin repeat-containing protein At2g01680;	PF12796.4;PF13637.3;PF13857.3;PF00023.27;PF13962.3;PF13606.3	Ank_2;Ank_4;Ank_5;Ank;PGG;Ank_3	Ankyrin repeats;Ankyrin repeats;Ankyrin repeats;Ankyrin repeat;Domain of unknown function;Ankyrin repeat
TRINITY_DN55169_c1_g2	3358	1.53	0.445	0.22		------	------	------	------	------	------	------	------	------	------	------	------	------
TRINITY_DN55169_c1_g8	1365	29.905	11.18	6.91	PREDICTED: UPF0496 protein 1-like [Elaeis guineensis]	GO:0016021;GO:0016021;GO:0016021	CC:integral component of membrane;CC:integral component of membrane;CC:integral component of membrane;	------	------	------	------	------	------	gi|122247414|sp|Q10QE9.1|U496A_ORYSJ;	RecName: Full=UPF0496 protein 1 >gi|158706402|sp|A2XDK8.1|U496A_ORYSI RecName: Full=UPF0496 protein 1;	PF05055.9;PF05633.8	DUF677;DUF793	Protein of unknown function;Protein of unknown function
TRINITY_DN55228_c2_g5	1508	1.075	11.575	0		------	------	------	------	------	------	------	------	------	------	------	------	------
TRINITY_DN55245_c0_g1	2011	0.235	0.645	5.005	PREDICTED: uncharacterized protein LOC105041137 isoform X1 [Elaeis guineensis]	GO:0016021;GO:0016021;GO:0016021;GO:0016757;GO:0016757;GO:0016757	CC:integral component of membrane;CC:integral component of membrane;CC:integral component of membrane;MF:transferase activity, transferring glycosyl groups;MF:transferase activity, transferring glycosyl groups;MF:transferase activity, transferring glycosyl groups;	------	------	------	------	------	------	gi|82076796|sp|Q5NDE6.1|PMGT2_XENTR;	RecName: Full=Protein O-linked-mannose beta-1,4-N-acetylglucosaminyltransferase 2; Short=POMGnT2; AltName: Full=Extracellular O-linked N-acetylglucosamine transferase-like; AltName: Full=Glycosyltransferase-like domain-containing protein 2;	PF04577.11	DUF563	Protein of unknown function
TRINITY_DN55245_c0_g2	1663	0.065	0.695	1.44	PREDICTED: uncharacterized protein LOC105041137 isoform X2 [Elaeis guineensis]	GO:0016021;GO:0016021;GO:0016757;GO:0016757	CC:integral component of membrane;CC:integral component of membrane;MF:transferase activity, transferring glycosyl groups;MF:transferase activity, transferring glycosyl groups;	------	------	------	------	------	------	gi|158563925|sp|Q5NDL3.2|EOGT_CHICK;	RecName: Full=EGF domain-specific O-linked N-acetylglucosamine transferase; AltName: Full=Extracellular O-linked N-acetylglucosamine transferase; Flags: Precursor;	PF04577.11	DUF563	Protein of unknown function
TRINITY_DN55258_c4_g3	1893	1.535	0.235	0.015		------	------	------	------	------	------	------	------	------	------	------	------	------
TRINITY_DN55301_c4_g1	1506	3.61	0.21	0.19		------	------	------	------	------	------	------	------	------	------	------	------	------
TRINITY_DN55379_c5_g2	934	11.475	7.63	0.58		------	------	------	------	------	------	------	------	------	------	------	------	------
TRINITY_DN55394_c8_g1	749	48.96	5.65	4.905	PREDICTED: beta-amylase 1, chloroplastic [Phoenix dactylifera]	GO:0000272;GO:0000272;GO:0000272;GO:0016161;GO:0016161;GO:0016161	BP:polysaccharide catabolic process;BP:polysaccharide catabolic process;BP:polysaccharide catabolic process;MF:beta-amylase activity;MF:beta-amylase activity;MF:beta-amylase activity;	K01177	E3.2.1.2	map00500	Starch and sucrose metabolism	------	------	gi|75335046|sp|Q9LIR6.1|BAM1_ARATH;	RecName: Full=Beta-amylase 1, chloroplastic; AltName: Full=1,4-alpha-D-glucan maltohydrolase; AltName: Full=Beta-amylase 7; AltName: Full=Thioredoxin-regulated beta-amylase; Short=TR-BAMY; Flags: Precursor;	PF01373.14	Glyco_hydro_14	Glycosyl hydrolase family 14
TRINITY_DN55433_c8_g1	894	49.385	9.565	8.13	chitinase 10-like [Dendrobium catenatum]	GO:0005975;GO:0016998;GO:0006032;GO:0004568	BP:carbohydrate metabolic process;BP:cell wall macromolecule catabolic process;BP:chitin catabolic process;MF:chitinase activity;	------	------	------	------	COG3979	G:Carbohydrate transport and metabolism	gi|75107490|sp|Q5NB11.1|CHI10_ORYSJ;	RecName: Full=Chitinase 10; AltName: Full=Pathogenesis related;	PF00182.16	Glyco_hydro_19	Chitinase class I
TRINITY_DN55452_c4_g5	1608	0.12	3.175	3.22	probable LRR receptor-like serine/threonine-protein kinase At1g67720 isoform X1 [Asparagus officinalis]	------	------	------	------	------	------	------	------	gi|263430191|sp|C0LGI2.1|Y1677_ARATH;	RecName: Full=Probable LRR receptor-like serine/threonine-protein kinase At1g67720; Flags: Precursor;	PF07714.14;PF00069.22	Pkinase_Tyr;Pkinase	Protein tyrosine kinase;Protein kinase domain
TRINITY_DN55510_c1_g2	3871	4.315	3.565	146.78	LOW QUALITY PROTEIN: prolyl endopeptidase-like [Asparagus officinalis]	GO:0004252;GO:0070008;GO:0004252;GO:0070008	MF:serine-type endopeptidase activity;MF:serine-type exopeptidase activity;MF:serine-type endopeptidase activity;MF:serine-type exopeptidase activity;	K01322	PREP	------	------	COG1505	E:Amino acid transport and metabolism	gi|215273868|sp|P48147.2|PPCE_HUMAN;	RecName: Full=Prolyl endopeptidase; Short=PE; AltName: Full=Post-proline cleaving enzyme;	PF02897.12;PF00326.18	Peptidase_S9_N;Peptidase_S9	Prolyl oligopeptidase, N-terminal beta-propeller domain;Prolyl oligopeptidase family
TRINITY_DN55537_c0_g7	3023	1.97	0.16	0.03		------	------	------	------	------	------	------	------	------	------	------	------	------
TRINITY_DN55592_c0_g2	566	38.09	7.47	4.67	actin [Oryza sativa Indica Group]	GO:0005737;GO:0005856;GO:0005524;GO:0005524;GO:0005524;GO:0005524	CC:cytoplasm;CC:cytoskeleton;MF:ATP binding;MF:ATP binding;MF:ATP binding;MF:ATP binding;	K05692	ACTB_G1	map04145	Phagosome	------	------	gi|231502|sp|P30170.1|ACT10_SOLTU;	RecName: Full=Actin-85C;	------	------	------
TRINITY_DN55684_c3_g4	1021	0.705	4.795	14.825	PREDICTED: NADPH:quinone oxidoreductase-like [Elaeis guineensis]	GO:0005829;GO:0016491;GO:0010181;GO:0052873	CC:cytosol;MF:oxidoreductase activity;MF:FMN binding;MF:FMN reductas;	------	------	------	------	COG0431	R:General function prediction only	gi|75273736|sp|Q9LK88.1|NQR_ARATH;	RecName: Full=NADPH:quinone oxidoreductase;	PF03358.12;PF02525.14	FMN_red;Flavodoxin_2	NADPH-dependent FMN reductase;Flavodoxin-like fold
TRINITY_DN55733_c3_g3	1196	34.88	10.15	8.05	uncharacterized protein LOC109839988 isoform X3 [Asparagus officinalis]	------	------	------	------	------	------	------	------	------	------	------	------	------
TRINITY_DN55746_c1_g1	625	8.7	4.685	0.24		------	------	------	------	------	------	------	------	------	------	------	------	------
TRINITY_DN55929_c2_g5	335	114.115	239.295	3203.1	PREDICTED: thiamine thiazole synthase 2, chloroplastic-like [Erythranthe guttata]	GO:0006950;GO:0009228;GO:0052837;GO:0006950;GO:0009228;GO:0052837;GO:0006950;GO:0009228;GO:0052837;GO:0006950;GO:0009228;GO:0052837;GO:0009570;GO:0005829;GO:0009570;GO:0005829;GO:0009570;GO:0005829;GO:0009570;GO:0005829;GO:0046872;GO:0046872;GO:0046872;GO:0046872	BP:response to stress;BP:thiamine biosynthetic process;BP:thiazole biosynthetic process;BP:response to stress;BP:thiamine biosynthetic process;BP:thiazole biosynthetic process;BP:response to stress;BP:thiamine biosynthetic process;BP:thiazole biosynthetic process;BP:response to stress;BP:thiamine biosynthetic process;BP:thiazole biosynthetic process;CC:chloroplast stroma;CC:cytosol;CC:chloroplast…	K03146	THI4, THI1	map00730	Thiamine metabolism	------	------	gi|2501189|sp|Q41738.1|THI41_MAIZE;	RecName: Full=Thiamine thiazole synthase 1, chloroplastic; AltName: Full=Thiazole biosynthetic enzyme 1; Flags: Precursor;	PF01946.14	Thi4	Thi4 family
TRINITY_DN55941_c0_g4	667	37.455	2.62	0	receptor kinase-like protein Xa21 [Asparagus officinalis]	GO:0016021;GO:0016301;GO:0016301	CC:integral component of membrane;MF:kinase activity;MF:kinase activity;	------	------	------	------	------	------	gi|264664489|sp|C0LGP4.1|Y3475_ARATH;	RecName: Full=Probable LRR receptor-like serine/threonine-protein kinase At3g47570; Flags: Precursor;	PF13855.3;PF12799.4	LRR_8;LRR_4	Leucine rich repeat;Leucine Rich repeats
TRINITY_DN55998_c2_g4	2901	0.88	3.17	6.13	PREDICTED: NHL repeat-containing protein 2 isoform X1 [Phoenix dactylifera]	GO:0045454;GO:0008152;GO:0005623;GO:0016787	BP:cell redox homeostasis;BP:metabolic process;CC:cell;MF:hydrolase activity;	------	------	------	------	COG0637	R:General function prediction only	gi|81898236|sp|Q8BZW8.1|NHLC2_MOUSE;	RecName: Full=NHL repeat-containing protein 2;	PF01436.18;PF13905.3;PF08450.9;PF08534.7;PF00578.18;PF00085.17	NHL;Thioredoxin_8;SGL;Redoxin;AhpC-TSA;Thioredoxin	NHL repeat;Thioredoxin-like;SMP-30/Gluconolaconase/LRE-like region;Redoxin;AhpC/TSA family;Thioredoxin
TRINITY_DN56002_c2_g5	780	9.935	33.185	71.23	PREDICTED: ethylene-responsive transcription factor ERF054-like [Phoenix dactylifera]	GO:0006351;GO:0005634;GO:0003677;GO:0003700	BP:transcription, DNA-templated;CC:nucleus;MF:DNA binding;MF:transcription factor activity, sequence-specific DNA binding;	------	------	------	------	------	------	------	------	------	------	------
TRINITY_DN56027_c8_g1	793	0	0.16	4.005		------	------	------	------	------	------	------	------	------	------	------	------	------
TRINITY_DN56028_c5_g2	891	4.9	14.395	32.2		------	------	------	------	------	------	------	------	------	------	------	------	------
TRINITY_DN56043_c6_g1	1518	19.855	1.565	1.79		------	------	------	------	------	------	------	------	------	------	------	------	------
TRINITY_DN56051_c3_g4	2086	1.7	0.055	0.045		------	------	------	------	------	------	------	------	------	------	------	------	------
TRINITY_DN56084_c2_g2	942	19.47	2.37	4.755	PREDICTED: calcium-binding protein CML42-like [Brassica rapa]	GO:0005509;GO:0005509	MF:calcium ion binding;MF:calcium ion binding;	K13448	CML	map04626	Plant-pathogen interaction	------	------	gi|75337714|sp|Q9SVG9.1|CML42_ARATH;	RecName: Full=Calcium-binding protein CML42; AltName: Full=Calmodulin-like protein 42;	PF00036.29;PF13405.3;PF13202.3;PF13499.3	EF-hand_1;EF-hand_6;EF-hand_5;EF-hand_7	EF hand;EF-hand domain;EF hand;EF-hand domain pair
TRINITY_DN56086_c3_g2	952	0	2.45	3.415		------	------	------	------	------	------	------	------	------	------	------	------	------
TRINITY_DN56089_c4_g1	1027	5.215	0.215	0.415		------	------	------	------	------	------	------	------	------	------	------	------	------
TRINITY_DN56114_c4_g2	1780	130.27	13.825	35.665	cytochrome P450 71A1-like isoform X1 [Asparagus officinalis]	GO:0020037;GO:0005506;GO:0004497;GO:0016705;GO:0020037;GO:0005506;GO:0004497;GO:0016705	MF:heme binding;MF:iron ion binding;MF:monooxygenase activity;MF:oxidoreductase activity, acting on paired donors, with incorporation or reduction of molecular oxygen;MF:heme binding;MF:iron ion binding;MF:monooxygenase activity;MF:oxidoreductase activity, acting on paired donors, with incorporation or reduction of molecular oxygen;	------	------	------	------	------	------	gi|311033356|sp|P24465.2|C71A1_PERAE;	RecName: Full=Cytochrome P450 71A1; AltName: Full=ARP-2; AltName: Full=CYPLXXIA1 [Persea americana];	PF00067.19	p450	Cytochrome P450
TRINITY_DN56116_c2_g1	2019	0.085	0.435	1.19	glycerol kinase [Pandanus amaryllifolius]	GO:0005975;GO:0006072;GO:0042742;GO:0019563;GO:0006072;GO:0080167;GO:0010188;GO:0002237;GO:0005975;GO:0006072;GO:0005829;GO:0004370;GO:0004370;GO:0004370	BP:carbohydrate metabolic process;BP:glycerol-3-phosphate metabolic process;BP:defense response to bacterium;BP:glycerol catabolic process;BP:glycerol-3-phosphate metabolic process;BP:response to karrikin;BP:response to microbial phytotoxin;BP:response to molecule of bacterial origin;BP:carbohydrate metabolic process;BP:glycerol-3-phosphate metabolic process;CC:cytosol;MF:glycerol kinase activity…	K00864	glpK, GK	map04626;map00561	Plant-pathogen interaction;Glycerolipid metabolism	------	------	gi|75312290|sp|Q9M8L4.1|GLPK_ARATH;	RecName: Full=Glycerol kinase; Short=Glycerokinase; AltName: Full=ATP:glycerol 3-phosphotransferase; AltName: Full=Protein GLYCEROL INSENSITIVE 1; AltName: Full=Protein NONHOST RESISTANCE TO P. S. PHASEOLICOLA 1;	------	------	------
TRINITY_DN56192_c3_g2	750	5.54	33.175	89.205	PREDICTED: uncharacterized protein LOC105050093 [Elaeis guineensis]	------	------	------	------	------	------	------	------	------	------	------	------	------
TRINITY_DN56236_c3_g1	605	1.39	5.505	14.365		------	------	------	------	------	------	------	------	------	------	------	------	------
TRINITY_DN56250_c2_g2	711	1.35	7.71	11.21	PREDICTED: uncharacterized protein LOC105041766 [Elaeis guineensis]	GO:0006412;GO:0006412;GO:0006412;GO:0015934;GO:0015934;GO:0015934;GO:0003735;GO:0003735;GO:0003735	BP:translation;BP:translation;BP:translation;CC:large ribosomal subunit;CC:large ribosomal subunit;CC:large ribosomal subunit;MF:structural constituent of ribosome;MF:structural constituent of ribosome;MF:structural constituent of ribosome;	K02911	RP-L32, MRPL32, rpmF	map03010	Ribosome	------	------	------	------	PF01783.20	Ribosomal_L32p	Ribosomal L32p protein family
TRINITY_DN56263_c11_g1	1343	4.315	0.105	0.255		------	------	------	------	------	------	------	------	------	------	------	------	------
TRINITY_DN56270_c6_g1	859	119.52	45.66	26.375	PREDICTED: 7-deoxyloganetic acid glucosyltransferase-like [Phoenix dactylifera]	GO:0008152;GO:0016758	BP:metabolic process;MF:transferase activity, transferring hexosyl groups;	K21374;K21373	UGT8, UGT709C2;UGT85A	------	------	------	------	gi|75312298|sp|Q9M9E7.1|U85A4_ARATH;	RecName: Full=UDP-glycosyltransferase 85A4;	------	------	------
TRINITY_DN56284_c1_g3	1317	0.9	4.345	6.05	PREDICTED: uncharacterized protein LOC105041362 isoform X2 [Elaeis guineensis]	------	------	------	------	------	------	------	------	------	------	------	------	------
TRINITY_DN56301_c5_g1	1874	0.29	5.48	15.69	Dienelactone hydrolase [Parasponia andersonii]	GO:0016787	MF:hydrolase activity;	------	------	------	------	------	------	------	------	------	------	------
TRINITY_DN56306_c4_g2	1848	0.355	30.295	14.385	dnaJ homolog subfamily B member 13-like [Asparagus officinalis]	GO:0006457;GO:0006457;GO:0006457;GO:0051082;GO:0051082;GO:0051082	BP:protein folding;BP:protein folding;BP:protein folding;MF:unfolded protein binding;MF:unfolded protein binding;MF:unfolded protein binding;	K09519	DNAJB13	------	------	------	------	gi|62900332|sp|Q9HJ83.1|DNAJ_THEAC;	RecName: Full=Chaperone protein DnaJ;	PF00226.28	DnaJ	DnaJ domain
TRINITY_DN56311_c1_g1	1838	0.21	1.46	2.375	PREDICTED: protein O-linked-mannose beta-1,4-N-acetylglucosaminyltransferase 2-like isoform X1 [Musa acuminata subsp. malaccensis]	------	------	------	------	------	------	------	------	gi|158512478|sp|A0JND3.1|EOGT_BOVIN;	RecName: Full=EGF domain-specific O-linked N-acetylglucosamine transferase; AltName: Full=Extracellular O-linked N-acetylglucosamine transferase; Flags: Precursor;	PF04577.11	DUF563	Protein of unknown function
TRINITY_DN56311_c2_g1	688	0.115	0.745	9.405	PREDICTED: protein O-linked-mannose beta-1,4-N-acetylglucosaminyltransferase 2-like isoform X1 [Musa acuminata subsp. malaccensis]	GO:0016757;GO:0016757;GO:0016757	MF:transferase activity, transferring glycosyl groups;MF:transferase activity, transferring glycosyl groups;MF:transferase activity, transferring glycosyl groups;	------	------	------	------	------	------	gi|82232390|sp|Q5NDE3.1|PMGT2_TETNG;	RecName: Full=Protein O-linked-mannose beta-1,4-N-acetylglucosaminyltransferase 2; Short=POMGnT2; AltName: Full=Extracellular O-linked N-acetylglucosamine transferase-like; AltName: Full=Glycosyltransferase-like domain-containing protein 2;	PF04577.11	DUF563	Protein of unknown function
TRINITY_DN56318_c3_g1	1153	10.89	0.135	0.285		------	------	------	------	------	------	------	------	------	------	------	------	------
TRINITY_DN56358_c3_g1	262	55.3	391.675	339.985		------	------	------	------	------	------	------	------	------	------	------	------	------
TRINITY_DN56439_c2_g11	1565	15.555	7.74	3.5	GPN-loop GTPase 3 [Asparagus officinalis]	------	------	K06883	K06883	------	------	------	------	gi|82225894|sp|Q4V7Z0.1|GPN3_XENLA;	RecName: Full=GPN-loop GTPase 3; AltName: Full=ATP-binding domain 1 family member C;	PF03029.14;PF16575.2;PF04670.9	ATP_bind_1;CLP1_P;Gtr1_RagA	Conserved hypothetical ATP binding protein;mRNA cleavage and polyadenylation factor CLP1 P-loop;Gtr1/RagA G protein conserved region
TRINITY_DN56509_c1_g4	1174	1.15	0.345	0		------	------	------	------	------	------	------	------	------	------	------	------	------
TRINITY_DN56545_c3_g1	759	18.73	1.415	1.72	PREDICTED: uncharacterized protein LOC105045143 [Elaeis guineensis]	------	------	------	------	------	------	------	------	------	------	------	------	------
TRINITY_DN56546_c4_g2	949	676.19	30.31	53.885	aquaporin SIP1-2-like [Dendrobium catenatum]	GO:0016021;GO:0016021;GO:0015267;GO:0015267	CC:integral component of membrane;CC:integral component of membrane;MF:channel activity;MF:channel activity;	K09875	SIP	------	------	------	------	gi|75308069|sp|Q9ATM3.1|SIP11_MAIZE;	RecName: Full=Aquaporin SIP1-1; AltName: Full=Small basic intrinsic protein 1-1; AltName: Full=ZmSIP1-1; AltName: Full=ZmSIP1;1;	PF00230.17	MIP	Major intrinsic protein
TRINITY_DN56576_c2_g2	685	16.955	0.555	2.555	PREDICTED: receptor-like protein kinase HAIKU2 [Elaeis guineensis]	GO:0016021;GO:0016021;GO:0005524;GO:0004674;GO:0005524;GO:0004674	CC:integral component of membrane;CC:integral component of membrane;MF:ATP binding;MF:protein serine/threonine kinase activity;MF:ATP binding;MF:protein serine/threonine kinase activity;	------	------	------	------	------	------	gi|75273596|sp|Q9LJM4.1|IKU2_ARATH;	RecName: Full=Receptor-like protein kinase HAIKU2; Flags: Precursor;	PF00069.22;PF07714.14	Pkinase;Pkinase_Tyr	Protein kinase domain;Protein tyrosine kinase
TRINITY_DN56588_c2_g2	1314	0	1.645	1.165		------	------	------	------	------	------	------	------	------	------	------	------	------
TRINITY_DN56612_c4_g1	2722	208.43	13.705	11.025	calcium-dependent protein kinase 16 isoform X2 [Morus notabilis]	GO:0005524;GO:0005509;GO:0004672;GO:0005524;GO:0005509;GO:0004683	MF:ATP binding;MF:calcium ion binding;MF:protein kinase activity;MF:ATP binding;MF:calcium ion binding;MF:calmodulin-dependent protein kinase activity;	K13412	CPK	map04626	Plant-pathogen interaction	------	------	gi|75327228|sp|Q7XJR9.1|CDPKG_ARATH;	RecName: Full=Calcium-dependent protein kinase 16;	------	------	------
TRINITY_DN56649_c1_g5	2622	0.225	0.94	2.1	pentatricopeptide repeat-containing protein At1g52620 isoform X1 [Asparagus officinalis]	------	------	------	------	------	------	------	------	gi|75207557|sp|Q9SSR4.1|PPR77_ARATH;	RecName: Full=Pentatricopeptide repeat-containing protein At1g52620;	PF13041.3;PF12854.4;PF01535.17;PF13812.3;PF17177.1;PF10037.6	PPR_2;PPR_1;PPR;PPR_3;PPR_long;MRP-S27	PPR repeat family;PPR repeat;PPR repeat;Pentatricopeptide repeat domain;Pentacotripeptide-repeat region of PROPR;Mitochondrial 28S ribosomal protein S27
TRINITY_DN56669_c2_g1	1815	1.665	0.195	0.07	hypothetical protein VITISV_021305 [Vitis vinifera]	GO:0015074;GO:0015074;GO:0015074;GO:0016021;GO:0003676;GO:0003676;GO:0003676	BP:DNA integration;BP:DNA integration;BP:DNA integration;CC:integral component of membrane;MF:nucleic acid binding;MF:nucleic acid binding;MF:nucleic acid binding;	K05909	E1.10.3.2	------	------	------	------	------	------	------	------	------
TRINITY_DN56687_c13_g1	1558	1.145	2.025	29.595	putative F-box protein At4g22170 [Asparagus officinalis]	------	------	------	------	------	------	------	------	gi|142991284|sp|Q9FLP7.2|FB294_ARATH;	RecName: Full=Putative F-box protein At5g55150;	PF03478.15;PF00646.30	DUF295;F-box	Protein of unknown function;F-box domain
TRINITY_DN56698_c1_g1	1225	3.175	2.115	0.615		------	------	------	------	------	------	------	------	------	------	------	------	------
TRINITY_DN56727_c3_g7	468	0.13	0.885	22.145		------	------	------	------	------	------	------	------	------	------	------	------	------
TRINITY_DN56760_c8_g1	1268	0.615	4.265	4.71		------	------	------	------	------	------	------	------	------	------	------	------	------
TRINITY_DN56793_c0_g2	1834	0.715	0.89	8.98	PREDICTED: organic cation/carnitine transporter 1 [Elaeis guineensis]	GO:0015839;GO:0010150;GO:0016021;GO:0016021;GO:0016021;GO:0005886;GO:0022857;GO:0022857;GO:0015226	BP:cadaverine transport;BP:leaf senescence;CC:integral component of membrane;CC:integral component of membrane;CC:integral component of membrane;CC:plasma membrane;MF:transmembrane transporter activity;MF:transmembrane transporter activity;MF:carnitine transmembrane transporter activity;	------	------	------	------	------	------	gi|75262291|sp|Q9CAT6.1|OCT1_ARATH;	RecName: Full=Organic cation/carnitine transporter 1; Short=AtOCT1;	PF00083.21;PF07690.13	Sugar_tr;MFS_1	Sugar;Major Facilitator Superfamily
TRINITY_DN56799_c2_g3	2285	1.945	0.53	0.225		------	------	------	------	------	------	------	------	------	------	------	------	------
TRINITY_DN56830_c13_g1	912	0.17	1.665	8.335	uncharacterized protein A4U43_C03F5160 [Asparagus officinalis]	GO:0016021	CC:integral component of membrane;	------	------	------	------	------	------	------	------	PF14368.3;PF00234.19	LTP_2;Tryp_alpha_amyl	Probable lipid transfer;Protease inhibitor/seed storage/LTP family
TRINITY_DN56856_c2_g1	1186	15.62	1.07	1.615	PREDICTED: uncharacterized protein LOC103696844 [Phoenix dactylifera]	------	------	------	------	------	------	------	------	------	------	PF07279.8;PF13460.3;PF13578.3	DUF1442;NAD_binding_10;Methyltransf_24	Protein of unknown function;NA;Methyltransferase domain
TRINITY_DN56881_c4_g2	1349	1.575	5.895	6.045	uncharacterized protein LOC109832864 isoform X2 [Asparagus officinalis]	------	------	------	------	------	------	------	------	------	------	PF14389.3;PF04784.11	Lzipper-MIP1;DUF547	Leucine-zipper of ternary complex factor MIP1;Protein of unknown function, DUF547
TRINITY_DN56951_c5_g7	686	0.33	0.945	4.615		------	------	------	------	------	------	------	------	------	------	------	------	------
TRINITY_DN56969_c7_g2	2747	96.63	11.245	13.2	hypothetical protein CDL12_04614 [Handroanthus impetiginosus]	GO:0016021;GO:0046983;GO:0046983	CC:integral component of membrane;MF:protein dimerization activity;MF:protein dimerization activity;	------	------	------	------	------	------	------	------	------	------	------
TRINITY_DN56987_c6_g4	711	4.815	0.71	0.34		------	------	------	------	------	------	------	------	------	------	------	------	------
TRINITY_DN56996_c1_g1	2581	5.485	30.055	32.39	two-component response regulator-like APRR3 [Asparagus officinalis]	GO:0000160;GO:0000160;GO:0000160;GO:0005634;GO:0005634;GO:0005634	BP:phosphorelay signal transduction system;BP:phosphorelay signal transduction system;BP:phosphorelay signal transduction system;CC:nucleus;CC:nucleus;CC:nucleus;	K12130	PRR5	map04712	Circadian rhythm - plant	------	------	gi|52783225|sp|Q6LA42.2|APRR5_ARATH;	RecName: Full=Two-component response regulator-like APRR5; AltName: Full=Pseudo-response regulator 5;	PF00072.21;PF06203.11	Response_reg;CCT	Response regulator receiver domain;CCT motif
TRINITY_DN57004_c3_g3	1085	1.7	0.12	0		------	------	------	------	------	------	------	------	------	------	------	------	------
TRINITY_DN57011_c2_g1	684	1.945	5.65	16.245	orf14	GO:0005739;GO:0005739;GO:0005739;GO:0005739;GO:0005739	CC:mitochondrion;CC:mitochondrion;CC:mitochondrion;CC:mitochondrion;CC:mitochondrion;	------	------	------	------	------	------	gi|45477077|sp|P92563.1|M1330_ARATH;	RecName: Full=Uncharacterized mitochondrial protein AtMg01330; AltName: Full=ORF107h;	------	------	------
TRINITY_DN57056_c2_g2	2380	43.925	13.57	10.915	Chaperone protein ClpD, chloroplastic [Apostasia shenzhenica]	GO:0019538;GO:0019538;GO:0005524;GO:0005524	BP:protein metabolic process;BP:protein metabolic process;MF:ATP binding;MF:ATP binding;	K03696	clpC	------	------	------	------	gi|1169544|sp|P42762.1|CLPD_ARATH;	RecName: Full=Chaperone protein ClpD, chloroplastic; AltName: Full=ATP-dependent Clp protease ATP-binding subunit ClpD homolog; AltName: Full=Casein lytic proteinase D; AltName: Full=ERD1 protein; AltName: Full=Protein EARLY RESPONSIVE TO DEHYDRATION 1; AltName: Full=Protein SENESCENCE ASSOCIATED GENE 15; Flags: Precursor;	PF10431.6;PF07724.11;PF07728.11	ClpB_D2-small;AAA_2;AAA_5	C-terminal, D2-small domain, of ClpB protein;AAA domain;AAA domain
TRINITY_DN57075_c3_g6	454	0	2.51	7.175		------	------	------	------	------	------	------	------	------	------	------	------	------
TRINITY_DN57094_c4_g4	1278	3.845	1.32	0.39	uncharacterized protein A4U43_C03F9140 [Asparagus officinalis]	GO:0048544;GO:0016021;GO:0005524;GO:0030246;GO:0004674	BP:recognition of pollen;CC:integral component of membrane;MF:ATP binding;MF:carbohydrate binding;MF:protein serine/threonine kinase activity;	------	------	------	------	------	------	gi|75220153|sp|O81906.1|B120_ARATH;	RecName: Full=G-type lectin S-receptor-like serine/threonine-protein kinase B120; Flags: Precursor;	PF01453.21;PF00954.17;PF08276.8	B_lectin;S_locus_glycop;PAN_2	D-mannose binding lectin;S-locus glycoprotein domain;PAN-like domain
TRINITY_DN57149_c1_g2	932	206.745	145.945	20.86	PREDICTED: Bowman-Birk type proteinase inhibitor-like [Musa acuminata subsp. malaccensis]	GO:0005576;GO:0005576;GO:0004867;GO:0004867	CC:extracellular region;CC:extracellular region;MF:serine-type endopeptidase inhibitor activity;MF:serine-type endopeptidase inhibitor activity;	------	------	------	------	------	------	gi|1708385|sp|P01055.2|IBB1_SOYBN;	RecName: Full=Bowman-Birk type proteinase inhibitor; Short=BBI; Flags: Precursor;	PF00228.17	Bowman-Birk_leg	Bowman-Birk serine protease inhibitor family
TRINITY_DN57150_c6_g1	2647	0.01	14.51	6.29	Protein LOL1 [Dendrobium catenatum]	------	------	------	------	------	------	------	------	gi|122222103|sp|Q0J7V9.1|LSD1_ORYSJ;	RecName: Full=Protein LSD1; AltName: Full=Protein LESION SIMULATING DISEASE 1; Short=OsLSD1; AltName: Full=Putative zinc finger LSD1;	PF06943.9	zf-LSD1	LSD1 zinc finger
TRINITY_DN57245_c4_g4	555	0	0.82	3.93	PREDICTED: probable L-type lectin-domain containing receptor kinase S.7 [Elaeis guineensis]	------	------	------	------	------	------	------	------	------	------	------	------	------
TRINITY_DN57247_c3_g1	1355	0.505	4.56	8.485	Reverse transcriptase zinc-binding domain [Macleaya cordata]	GO:0003676;GO:0003964;GO:0003676;GO:0003964;GO:0003676;GO:0003964;GO:0003676;GO:0003964;GO:0003676;GO:0003964	MF:nucleic acid binding;MF:RNA-directed DNA polymerase activity;MF:nucleic acid binding;MF:RNA-directed DNA polymerase activity;MF:nucleic acid binding;MF:RNA-directed DNA polymerase activity;MF:nucleic acid binding;MF:RNA-directed DNA polymerase activity;MF:nucleic acid binding;MF:RNA-directed DNA polymerase activity;	------	------	------	------	------	------	------	------	PF13456.3	RVT_3	Reverse transcriptase-like
TRINITY_DN57284_c6_g1	2979	243.125	124.535	58.285	PREDICTED: putative glucuronosyltransferase PGSIP8 [Phoenix dactylifera]	GO:0006486;GO:0006486;GO:0016021;GO:0016021;GO:0016021;GO:0016740;GO:0016757;GO:0016757	BP:protein glycosylation;BP:protein glycosylation;CC:integral component of membrane;CC:integral component of membrane;CC:integral component of membrane;MF:transferase activity;MF:transferase activity, transferring glycosyl groups;MF:transferase activity, transferring glycosyl groups;	------	------	------	------	------	------	gi|75161680|sp|Q8VZP6.1|GUX8_ARATH;	RecName: Full=Putative glucuronosyltransferase PGSIP8; AltName: Full=Glycogenin-like protein 8; AltName: Full=Plant glycogenin-like starch initiation protein 8;	PF11051.5	Mannosyl_trans3	Mannosyltransferase putative
TRINITY_DN57295_c4_g1	1069	7.655	2.41	2.275		------	------	------	------	------	------	------	------	------	------	------	------	------
TRINITY_DN57299_c3_g2	1278	3.87	1.625	0.23		------	------	------	------	------	------	------	------	------	------	------	------	------
TRINITY_DN57307_c3_g7	1259	1.875	7.725	156.39	cysteine synthase [Phalaenopsis equestris]	GO:0006535;GO:0006535;GO:0006535;GO:0004124;GO:0004124;GO:0004124	BP:cysteine biosynthetic process from serine;BP:cysteine biosynthetic process from serine;BP:cysteine biosynthetic process from serine;MF:cysteine synthase activity;MF:cysteine synthase activity;MF:cysteine synthase activity;	K01738	cysK	map00270;map00920	Cysteine and methionine metabolism;Sulfur metabolism	COG0031	E:Amino acid transport and metabolism	gi|84028195|sp|Q9XEA6.2|CYSK1_ORYSJ;	RecName: Full=Cysteine synthase; Short=CSase; AltName: Full=O-acetylserine;	PF00291.22	PALP	Pyridoxal-phosphate dependent enzyme
TRINITY_DN57363_c1_g1	1194	27.415	4.66	2.26		------	------	------	------	------	------	------	------	------	------	------	------	------
TRINITY_DN57376_c0_g1	1414	7.575	0.7	0.545	PREDICTED: UPF0481 protein At3g47200 [Theobroma cacao]	GO:0016021	CC:integral component of membrane;	------	------	------	------	------	------	gi|218551757|sp|P0C897.1|Y3264_ARATH;	RecName: Full=Putative UPF0481 protein At3g02645;	PF03140.12	DUF247	Plant protein of unknown function
TRINITY_DN57394_c2_g1	2231	0	0.495	0.845	Vesicle-associated protein 2-2 [Apostasia shenzhenica]	GO:0005789;GO:0016021;GO:0005789;GO:0016021;GO:0005789;GO:0016021;GO:0005789;GO:0016021	CC:endoplasmic reticulum membrane;CC:integral component of membrane;CC:endoplasmic reticulum membrane;CC:integral component of membrane;CC:endoplasmic reticulum membrane;CC:integral component of membrane;CC:endoplasmic reticulum membrane;CC:integral component of membrane;	------	------	------	------	------	------	------	------	------	------	------
TRINITY_DN57408_c1_g2	662	10.24	26.6	102.65	heavy metal-associated isoprenylated plant protein 21-like [Asparagus officinalis]	GO:0030001;GO:0030001;GO:0030001;GO:0046872;GO:0046872;GO:0046872	BP:metal ion transport;BP:metal ion transport;BP:metal ion transport;MF:metal ion binding;MF:metal ion binding;MF:metal ion binding;	------	------	------	------	COG2608	P:Inorganic ion transport and metabolism	gi|75262228|sp|Q9C9A3.1|HIP20_ARATH;	RecName: Full=Heavy metal-associated isoprenylated plant protein 20; Short=AtHIPP20; Flags: Precursor;	PF00403.23	HMA	Heavy-metal-associated domain
TRINITY_DN57429_c2_g2	662	3.93	0.625	0.395		------	------	------	------	------	------	------	------	------	------	------	------	------
TRINITY_DN57445_c3_g1	584	28.12	10.675	1.8		------	------	------	------	------	------	------	------	------	------	------	------	------
TRINITY_DN57475_c4_g1	1480	2.63	1.225	5.105		------	------	------	------	------	------	------	------	------	------	------	------	------
TRINITY_DN57501_c0_g3	1623	0.175	8.64	7.965	PREDICTED: polygalacturonase At1g48100-like [Elaeis guineensis]	GO:0005975;GO:0071555;GO:0005975;GO:0071555;GO:0005576;GO:0005576;GO:0004650;GO:0004650	BP:carbohydrate metabolic process;BP:cell wall organization;BP:carbohydrate metabolic process;BP:cell wall organization;CC:extracellular region;CC:extracellular region;MF:polygalacturonase activity;MF:polygalacturonase activity;	K01184	E3.2.1.15	map00040	Pentose and glucuronate interconversions	------	------	gi|75306312|sp|Q949Z1.1|PGLR4_ARATH;	RecName: Full=Polygalacturonase At1g48100; Short=PG; AltName: Full=Pectinase At1g48100; Flags: Precursor;	PF00295.14;PF12708.4;PF13229.3	Glyco_hydro_28;Pectate_lyase_3;Beta_helix	Glycosyl hydrolases family 28;Pectate lyase superfamily protein;Right handed beta helix region
TRINITY_DN57505_c3_g2	2688	11.82	2.36	2.26	LOW QUALITY PROTEIN: protein ARABIDILLO 1-like [Asparagus officinalis]	------	------	------	------	------	------	------	------	gi|75219086|sp|O22161.1|ADLO1_ARATH;	RecName: Full=Protein ARABIDILLO 1; AltName: Full=F-box only protein 5;	------	------	------
TRINITY_DN57549_c0_g3	1476	75.25	20.09	15.29	receptor-like protein kinase FERONIA [Asparagus officinalis]	GO:0042254;GO:0016021;GO:0016021;GO:0005634;GO:0005524;GO:0004672;GO:0005524;GO:0005525;GO:0004672	BP:ribosome biogenesis;CC:integral component of membrane;CC:integral component of membrane;CC:nucleus;MF:ATP binding;MF:protein kinase activity;MF:ATP binding;MF:GTP binding;MF:protein kinase activity;	------	------	------	------	------	------	gi|75337066|sp|Q9SCZ4.1|FERON_ARATH;	RecName: Full=Receptor-like protein kinase FERONIA; AltName: Full=Protein SIRENE; Flags: Precursor;	PF07714.14;PF00069.22	Pkinase_Tyr;Pkinase	Protein tyrosine kinase;Protein kinase domain
TRINITY_DN57551_c6_g2	910	1.67	1.385	0	pre-mRNA-processing-splicing factor 8A-like [Brassica napus]	GO:0000398;GO:0000398;GO:0005681;GO:0005681;GO:0030623;GO:0017070;GO:0030623;GO:0017070	BP:mRNA splicing, via spliceosome;BP:mRNA splicing, via spliceosome;CC:spliceosomal complex;CC:spliceosomal complex;MF:U5 snRNA binding;MF:U6 snRNA binding;MF:U5 snRNA binding;MF:U6 snRNA binding;	K12856	PRPF8, PRP8	map03040	Spliceosome	------	------	gi|75266254|sp|Q9SSD2.1|PRP8A_ARATH;	RecName: Full=Pre-mRNA-processing-splicing factor 8A; AltName: Full=PRP8 homolog A; Short=AtPRP8A; AltName: Full=Protein ABNORMAL SUSPENSOR 2; AltName: Full=Protein EMBRYO DEFECTIVE 14; AltName: Full=Protein EMBRYO DEFECTIVE 177; AltName: Full=Protein EMBRYO DEFECTIVE 33; AltName: Full=Protein SUPPRESSOR OF OVEREXPRESSED FCA 81;	------	------	------
TRINITY_DN57564_c1_g2	759	56.745	42.16	655.03	Peptide methionine sulfoxide reductase MsrA [Macleaya cordata]	GO:0008113;GO:0008113;GO:0008113;GO:0008113	MF:peptide-methionin;MF:peptide-methionin;MF:peptide-methionin;MF:peptide-methionin;	K07304	msrA	------	------	------	------	gi|1709692|sp|P54153.1|MSRA_SOLLC;	RecName: Full=Peptide methionine sulfoxide reductase; AltName: Full=Fruit-ripening protein E4; AltName: Full=Peptide-methionine;	PF01625.18	PMSR	Peptide methionine sulfoxide reductase
TRINITY_DN57570_c1_g1	1552	0.47	2.71	4.76		------	------	------	------	------	------	------	------	------	------	------	------	------
TRINITY_DN57708_c1_g1	749	0.285	0.64	4.245		------	------	------	------	------	------	------	------	------	------	------	------	------
TRINITY_DN57760_c2_g1	5378	0.29	0.635	3.4	hypothetical protein GOBAR_AA00016 [Gossypium barbadense]	GO:0015074;GO:0016021;GO:0003676;GO:0003676;GO:0008270	BP:DNA integration;CC:integral component of membrane;MF:nucleic acid binding;MF:nucleic acid binding;MF:zinc ion binding;	K20617	CYP71A	------	------	------	------	gi|130582|sp|P10978.1|POLX_TOBAC;	RecName: Full=Retrovirus-related Pol polyprotein from transposon TNT 1-94; Includes: RecName: Full=Protease; Includes: RecName: Full=Reverse transcriptase; Includes: RecName: Full=Endonuclease;	PF14223.3	Retrotran_gag_2	gag-polypeptide of LTR copia-type
TRINITY_DN57795_c1_g6	886	189.87	33.805	37.835	Heat stress transcription factor A-4b like [Actinidia chinensis var. chinensis]	GO:0005634;GO:0003700;GO:0043565	CC:nucleus;MF:transcription factor activity, sequence-specific DNA binding;MF:sequence-specific DNA binding;	K09419	HSFF	------	------	------	------	gi|11386827|sp|Q40152.1|HSF8_SOLLC;	RecName: Full=Heat shock factor protein HSF8; AltName: Full=Heat shock transcription factor 8; Short=HSTF 8; AltName: Full=Heat stress transcription factor;	PF00447.14	HSF_DNA-bind	HSF-type DNA-binding
TRINITY_DN57836_c1_g1	3250	0	0.745	4.02	zinc finger protein CONSTANS-LIKE 9-like [Asparagus officinalis]	GO:0005634;GO:0008270	CC:nucleus;MF:zinc ion binding;	------	------	------	------	------	------	------	------	PF06203.11	CCT	CCT motif
TRINITY_DN57863_c1_g4	1554	25.53	6.095	7.045	hypothetical protein AXF42_Ash004221 [Apostasia shenzhenica]	GO:0016021	CC:integral component of membrane;	------	------	------	------	------	------	------	------	PF06749.9	DUF1218	Protein of unknown function
TRINITY_DN57935_c1_g2	1708	0.415	13.78	67.925	uncharacterized protein LOC109820408 [Asparagus officinalis]	GO:0016021	CC:integral component of membrane;	------	------	------	------	------	------	gi|226735561|sp|B5YAR4.1|DNAJ_DICT6;	RecName: Full=Chaperone protein DnaJ;	PF00226.28;PF13370.3;PF13459.3	DnaJ;Fer4_13;Fer4_15	DnaJ domain;4Fe-4S single cluster domain of Ferredoxin I;4Fe-4S single cluster domain
TRINITY_DN57946_c6_g1	2477	9.22	1.475	1.21		------	------	------	------	------	------	------	------	------	------	------	------	------
TRINITY_DN57991_c6_g1	874	0.45	8.785	5.61		------	------	------	------	------	------	------	------	------	------	------	------	------
TRINITY_DN58013_c0_g3	1707	341.46	596.105	2609.03	PREDICTED: thiamine thiazole synthase, chloroplastic-like [Lupinus angustifolius]	GO:0006950;GO:0009228;GO:0052837;GO:0006950;GO:0009228;GO:0052837;GO:0009570;GO:0005829;GO:0009570;GO:0005829;GO:0046872;GO:0046872	BP:response to stress;BP:thiamine biosynthetic process;BP:thiazole biosynthetic process;BP:response to stress;BP:thiamine biosynthetic process;BP:thiazole biosynthetic process;CC:chloroplast stroma;CC:cytosol;CC:chloroplast stroma;CC:cytosol;MF:metal ion binding;MF:metal ion binding;	K03146	THI4, THI1	map00730	Thiamine metabolism	COG1635	H:Coenzyme transport and metabolism	gi|378524288|sp|F6H9A9.1|THI41_VITVI;	RecName: Full=Thiamine thiazole synthase 1, chloroplastic; AltName: Full=Thiazole biosynthetic enzyme 1; Flags: Precursor;	PF01946.14;PF00890.21;PF01266.21;PF13450.3;PF07992.11;PF05834.9;PF03486.11;PF12831.4	Thi4;FAD_binding_2;DAO;NAD_binding_8;Pyr_redox_2;Lycopene_cycl;HI0933_like;FAD_oxidored	Thi4 family;FAD binding domain;FAD dependent oxidoreductase;NA;Pyridine nucleotide-disulphide oxidoreductase;Lycopene cyclase protein;HI0933-like protein;FAD dependent oxidoreductase
TRINITY_DN58048_c2_g1	2886	34.545	0.22	0.63	protein of unknown function DUF4283 [Macleaya cordata]	------	------	------	------	------	------	------	------	------	------	------	------	------
TRINITY_DN58048_c2_g2	1422	1.24	0.035	0.02		------	------	------	------	------	------	------	------	------	------	------	------	------
TRINITY_DN58050_c6_g3	1935	1.145	2.485	13	protein NUCLEAR FUSION DEFECTIVE 4 isoform X2 [Asparagus officinalis]	GO:0016021	CC:integral component of membrane;	------	------	------	------	------	------	gi|754388961|sp|F4I9E1.1|NFD4_ARATH;	RecName: Full=Protein NUCLEAR FUSION DEFECTIVE 4;	PF06813.10;PF07690.13	Nodulin-like;MFS_1	Nodulin-like;Major Facilitator Superfamily
TRINITY_DN58078_c4_g2	1369	16.295	3.865	3.195	PREDICTED: NAC domain-containing protein 74-like [Phoenix dactylifera]	GO:0006355;GO:0006351;GO:0016021;GO:0005634;GO:0003677	BP:regulation of transcription, DNA-templated;BP:transcription, DNA-templated;CC:integral component of membrane;CC:nucleus;MF:DNA binding;	------	------	------	------	------	------	gi|75139797|sp|Q7GCL7.1|NAC74_ORYSJ;	RecName: Full=NAC domain-containing protein 74; Short=ONAC074;	PF02365.12	NAM	No apical meristem
TRINITY_DN58148_c0_g2	1919	44.76	9.275	6.63	PREDICTED: receptor-like protein kinase FERONIA [Phoenix dactylifera]	GO:0016021;GO:0016021;GO:0005524;GO:0004672;GO:0005524;GO:0004672	CC:integral component of membrane;CC:integral component of membrane;MF:ATP binding;MF:protein kinase activity;MF:ATP binding;MF:protein kinase activity;	------	------	------	------	------	------	gi|75337066|sp|Q9SCZ4.1|FERON_ARATH;	RecName: Full=Receptor-like protein kinase FERONIA; AltName: Full=Protein SIRENE; Flags: Precursor;	PF12819.4;PF11721.5	Malectin_like;Malectin	Carbohydrate-binding protein of the ER;Di-glucose binding within endoplasmic reticulum
TRINITY_DN58150_c1_g1	1443	2.135	0.72	0.095	PREDICTED: E3 ubiquitin-protein ligase At3g02290 [Elaeis guineensis]	------	------	------	------	------	------	------	------	gi|75301346|sp|Q8LE94.1|RING3_ARATH;	RecName: Full=E3 ubiquitin-protein ligase At3g02290; AltName: Full=RING finger protein At3g02290;	PF13639.3;PF12678.4;PF17123.2;PF13445.3;PF12861.4;PF14634.3;PF00097.22;PF13923.3;PF13920.3	zf-RING_2;zf-rbx1;zf-RING_11;zf-RING_UBOX;zf-ANAPC11;zf-RING_5;zf-C3HC4;zf-C3HC4_2;zf-C3HC4_3	Ring finger domain;RING-H2 zinc finger domain;RING-like zinc finger;RING-type zinc-finger;Anaphase-promoting complex subunit 11 RING-H2 finger;zinc-RING finger domain;Zinc finger, C3HC4 type;Zinc finger, C3HC4 type;Zinc finger, C3HC4 type
TRINITY_DN58213_c6_g1	1246	27.085	5.015	4.59	unnamed protein product [Coffea canephora]	GO:0006351;GO:0006351;GO:0005634;GO:0005634;GO:0003700;GO:0043565;GO:0003700;GO:0043565	BP:transcription, DNA-templated;BP:transcription, DNA-templated;CC:nucleus;CC:nucleus;MF:transcription factor activity, sequence-specific DNA binding;MF:sequence-specific DNA binding;MF:transcription factor activity, sequence-specific DNA binding;MF:sequence-specific DNA binding;	------	------	------	------	------	------	gi|29839626|sp|Q9FL62.1|WRK30_ARATH;	RecName: Full=Probable WRKY transcription factor 30; AltName: Full=WRKY DNA-binding protein 30;	PF03106.12	WRKY	WRKY DNA -binding domain
TRINITY_DN58265_c2_g1	760	0.575	2.94	8.865	NADH dehydrogenase subunit	GO:0016021;GO:0005739;GO:0005886;GO:0016021;GO:0005739;GO:0005886;GO:0016021;GO:0005739;GO:0005886;GO:0016021;GO:0005739;GO:0005886;GO:0008137;GO:0008137;GO:0008137;GO:0008137	CC:integral component of membrane;CC:mitochondrion;CC:plasma membrane;CC:integral component of membrane;CC:mitochondrion;CC:plasma membrane;CC:integral component of membrane;CC:mitochondrion;CC:plasma membrane;CC:integral component of membrane;CC:mitochondrion;CC:plasma membrane;MF:NADH dehydrogenas;MF:NADH dehydrogenas;MF:NADH dehydrogenas;MF:NADH dehydrogenas;	K03878	ND1	map00190	Oxidative phosphorylation	------	------	gi|266671|sp|Q01148.1|NU1M_WHEAT;	RecName: Full=NADH-ubiquinone oxidoreductase chain 1; AltName: Full=NADH dehydrogenase subunit 1;	------	------	------
TRINITY_DN58291_c3_g6	680	0	8.095	4.475		------	------	------	------	------	------	------	------	------	------	------	------	------
TRINITY_DN58296_c0_g2	3367	0.085	0.18	2.185	probable sucrose-phosphate synthase 4 isoform X1 [Asparagus officinalis]	GO:0005985;GO:0005985;GO:0005985;GO:0005886;GO:0046524;GO:0046524;GO:0016157;GO:0046524	BP:sucrose metabolic process;BP:sucrose metabolic process;BP:sucrose metabolic process;CC:plasma membrane;MF:sucrose-phosphate synthase activity;MF:sucrose-phosphate synthase activity;MF:sucrose synthase activity;MF:sucrose-phosphate synthase activity;	K00696	E2.4.1.14	map00500	Starch and sucrose metabolism	------	------	gi|353678117|sp|F4JLK2.1|SPSA4_ARATH;	RecName: Full=Probable sucrose-phosphate synthase 4; AltName: Full=Sucrose phosphate synthase 4F; Short=AtSPS4F; AltName: Full=UDP-glucose-fructose-phosphate glucosyltransferase;	PF00534.17;PF05116.10;PF13692.3;PF00862.16;PF13579.3;PF13439.3	Glycos_transf_1;S6PP;Glyco_trans_1_4;Sucrose_synth;Glyco_trans_4_4;Glyco_transf_4	Glycosyl transferases group 1;Sucrose-6F-phosphate phosphohydrolase;Glycosyl transferases group 1;Sucrose synthase;Glycosyl transferase 4-like domain;Glycosyltransferase Family 4
TRINITY_DN58343_c1_g2	1725	3.325	0.08	0.485		------	------	------	------	------	------	------	------	------	------	------	------	------
TRINITY_DN58406_c4_g1	592	0.29	2.145	7.625	PREDICTED: delt	GO:0016021;GO:0016021;GO:0050660;GO:0016614;GO:0050660;GO:0016614	CC:integral component of membrane;CC:integral component of membrane;MF:flavin adenine dinucleotide binding;MF:oxidoreductase activity, acting on CH-OH group of donors;MF:flavin adenine dinucleotide binding;MF:oxidoreductase activity, acting on CH-OH group of donors;	K09828	DHCR24, DWF1	map00100	Steroid biosynthesis	------	------	gi|3182981|sp|P93472.1|DIM_PEA;	RecName: Full=Delt;	------	------	------
TRINITY_DN58406_c4_g2	1600	0.545	0.545	6.26	PREDICTED: delt	GO:0016021;GO:0016021;GO:0050660;GO:0016614;GO:0050660;GO:0016614	CC:integral component of membrane;CC:integral component of membrane;MF:flavin adenine dinucleotide binding;MF:oxidoreductase activity, acting on CH-OH group of donors;MF:flavin adenine dinucleotide binding;MF:oxidoreductase activity, acting on CH-OH group of donors;	K09828	DHCR24, DWF1	map00100	Steroid biosynthesis	COG0277	C:Energy production and conversion	gi|3182981|sp|P93472.1|DIM_PEA;	RecName: Full=Delt;	PF01565.20	FAD_binding_4	FAD binding domain
TRINITY_DN58416_c6_g2	2444	2.285	1.665	0.38		------	------	------	------	------	------	------	------	------	------	------	------	------
TRINITY_DN58437_c3_g2	552	2.125	3.795	15.435	orf127	GO:0005739;GO:0016021	CC:mitochondrion;CC:integral component of membrane;	------	------	------	------	------	------	------	------	------	------	------
TRINITY_DN58439_c2_g3	1882	0.065	0.06	1.485	protein NRT1/ PTR FAMILY 8.1-like [Asparagus officinalis]	GO:0006857;GO:0016021;GO:0022857	BP:oligopeptide transport;CC:integral component of membrane;MF:transmembrane transporter activity;	K14638	SLC15A3_4, PHT	------	------	COG3104	E:Amino acid transport and metabolism	gi|75311821|sp|Q9M390.1|PTR1_ARATH;	RecName: Full=Protein NRT1/ PTR FAMILY 8.1; Short=AtNPF8.1; AltName: Full=Peptide transporter PTR1;	PF00854.18;PF07690.13	PTR2;MFS_1	POT family;Major Facilitator Superfamily
TRINITY_DN58440_c1_g2	5312	2.45	7.065	10.145	PREDICTED: ABC transporter G family member 39-like [Elaeis guineensis]	GO:0016021;GO:0016021;GO:0016021;GO:0005524;GO:0016887;GO:0005524;GO:0016887;GO:0005524;GO:0016887	CC:integral component of membrane;CC:integral component of membrane;CC:integral component of membrane;MF:ATP binding;MF:ATPase activity;MF:ATP binding;MF:ATPase activity;MF:ATP binding;MF:ATPase activity;	------	------	------	------	COG0842	V:Defense mechanisms	gi|75328828|sp|Q8GU88.1|AB39G_ORYSJ;	RecName: Full=ABC transporter G family member 39; Short=OsABCG39; AltName: Full=Pleiotropic drug resistance protein 7; Short=OsPDR7;	PF01061.21;PF00005.24;PF08370.8;PF13191.3;PF13481.3;PF13245.3	ABC2_membrane;ABC_tran;PDR_assoc;AAA_16;AAA_25;AAA_19	ABC-2 type transporter;ABC transporter;Plant PDR ABC transporter associated;AAA ATPase domain;AAA domain;Part of AAA domain
TRINITY_DN58471_c3_g1	4134	2.395	0.07	0.04	hypothetical protein GOBAR_DD06575 [Gossypium barbadense]	GO:0015074;GO:0015074;GO:0000105;GO:0005737;GO:0003676;GO:0004523;GO:0008270;GO:0043531;GO:0003676;GO:0008270;GO:0003879	BP:DNA integration;BP:DNA integration;BP:histidine biosynthetic process;CC:cytoplasm;MF:nucleic acid binding;MF:RNA-DNA hybrid ribonuclease activity;MF:zinc ion binding;MF:ADP binding;MF:nucleic acid binding;MF:zinc ion binding;MF:ATP phosphoribosyltransferase activity;	------	------	------	------	------	------	gi|130582|sp|P10978.1|POLX_TOBAC;	RecName: Full=Retrovirus-related Pol polyprotein from transposon TNT 1-94; Includes: RecName: Full=Protease; Includes: RecName: Full=Reverse transcriptase; Includes: RecName: Full=Endonuclease;	------	------	------
TRINITY_DN58524_c2_g3	1959	2.25	0.365	0.095		------	------	------	------	------	------	------	------	------	------	------	------	------
TRINITY_DN58554_c3_g1	853	21.855	122.38	182.66	uncharacterized protein LOC109718247 [Ananas comosus]	------	------	------	------	------	------	------	------	------	------	------	------	------
TRINITY_DN58586_c3_g1	2343	0.02	2.325	2.595		------	------	------	------	------	------	------	------	------	------	------	------	------
TRINITY_DN58615_c1_g3	1832	0	1.97	4.985		------	------	------	------	------	------	------	------	------	------	------	------	------
TRINITY_DN58625_c2_g1	3837	0.005	0.285	1.8		------	------	------	------	------	------	------	------	------	------	------	------	------
TRINITY_DN58650_c1_g5	2477	1.33	9.16	5.84		------	------	------	------	------	------	------	------	------	------	------	------	------
TRINITY_DN58669_c0_g1	413	416.555	63.445	50.15	PREDICTED: ABC transporter G family member 39-like isoform X1 [Elaeis guineensis]	GO:0016021;GO:0016021;GO:0005886;GO:0005524;GO:0016887;GO:0005524;GO:0042626	CC:integral component of membrane;CC:integral component of membrane;CC:plasma membrane;MF:ATP binding;MF:ATPase activity;MF:ATP binding;MF:ATPase activity, coupled to transmembrane movement of substances;	------	------	------	------	------	------	gi|75328828|sp|Q8GU88.1|AB39G_ORYSJ;	RecName: Full=ABC transporter G family member 39; Short=OsABCG39; AltName: Full=Pleiotropic drug resistance protein 7; Short=OsPDR7;	------	------	------
TRINITY_DN58677_c2_g2	1183	21.74	3.02	3.13	PREDICTED: calmodulin-binding protein 60 E [Nelumbo nucifera]	GO:0006950;GO:0006950;GO:0006950;GO:0006950;GO:0016021;GO:0005516;GO:0005516;GO:0005516;GO:0005516	BP:response to stress;BP:response to stress;BP:response to stress;BP:response to stress;CC:integral component of membrane;MF:calmodulin binding;MF:calmodulin binding;MF:calmodulin binding;MF:calmodulin binding;	------	------	------	------	------	------	gi|825168338|sp|C0SV51.1|CB60C_ARATH;	RecName: Full=Calmodulin-binding protein 60 C;	PF07887.8	Calmodulin_bind	Calmodulin binding protein-like
TRINITY_DN58680_c1_g2	597	162.025	5.03	12.57	hypothetical protein CDL12_15574 [Handroanthus impetiginosus]	------	------	------	------	------	------	------	------	------	------	------	------	------
TRINITY_DN58757_c0_g1	728	33.9	1.415	4.05	PREDICTED: pollen-specific leucine-rich repeat extensin-like protein 3 [Phoenix dactylifera]	------	------	------	------	------	------	------	------	------	------	PF05678.11	VQ	VQ motif
TRINITY_DN58805_c7_g1	1114	33.78	7.56	2.7		------	------	------	------	------	------	------	------	------	------	------	------	------
TRINITY_DN58815_c3_g3	2063	79.565	13.705	16.395	PREDICTED: reticuline oxidase-like [Musa acuminata subsp. malaccensis]	GO:0016021;GO:0050660;GO:0016614	CC:integral component of membrane;MF:flavin adenine dinucleotide binding;MF:oxidoreductase activity, acting on CH-OH group of donors;	------	------	------	------	------	------	gi|400972|sp|P30986.1|RETO_ESCCA;	RecName: Full=Reticuline oxidase; AltName: Full=Berberine bridge-forming enzyme; Short=BBE; AltName: Full=Tetrahydroprotoberberine synthase; Flags: Precursor;	PF01565.20;PF08031.9	FAD_binding_4;BBE	FAD binding domain;Berberine and berberine like
TRINITY_DN58837_c8_g1	2006	6.25	0.285	0.11		------	------	------	------	------	------	------	------	------	------	------	------	------
TRINITY_DN58838_c4_g1	1304	1.765	0.215	0.08		------	------	------	------	------	------	------	------	------	------	------	------	------
TRINITY_DN58847_c2_g1	637	85.755	12.675	15.91	PREDICTED: probable serine/threonine-protein kinase PIX13 [Elaeis guineensis]	GO:0005524;GO:0004674	MF:ATP binding;MF:protein serine/threonine kinase activity;	------	------	------	------	------	------	gi|21431784|sp|P43293.2|NAK_ARATH;	RecName: Full=Probable serine/threonine-protein kinase NAK;	------	------	------
TRINITY_DN58884_c3_g3	1406	0.02	0.81	3.69		------	------	------	------	------	------	------	------	------	------	------	------	------
TRINITY_DN58896_c0_g3	1351	0.345	0.76	3.745		------	------	------	------	------	------	------	------	------	------	------	------	------
TRINITY_DN58926_c1_g1	1008	34.99	78.305	165.16	glycine-rich RNA-binding protein 2, mitochondrial [Amborella trichopoda]	GO:0003723;GO:0003723;GO:0003723;GO:0003723	MF:RNA binding;MF:RNA binding;MF:RNA binding;MF:RNA binding;	------	------	------	------	------	------	gi|21542438|sp|P39697.2|RT19_ARATH;	RecName: Full=40S ribosomal protein S19, mitochondrial; Flags: Precursor;	------	------	------
TRINITY_DN58928_c7_g1	1672	2.705	2.63	0.015	PREDICTED: uncharacterized protein LOC105958311 [Erythranthe guttata]	------	------	------	------	------	------	------	------	------	------	PF10461.6	Peptidase_S68	Peptidase S68
TRINITY_DN58956_c1_g2	469	9.64	848.59	769.44	ribulose bisphosphate carboxylase small chain, chloroplastic-like [Asparagus officinalis]	GO:0015977;GO:0009853;GO:0015979;GO:0015977;GO:0009853;GO:0015979;GO:0009507;GO:0009507;GO:0004497;GO:0016984;GO:0004497;GO:0016984	BP:carbon fixation;BP:photorespiration;BP:photosynthesis;BP:carbon fixation;BP:photorespiration;BP:photosynthesis;CC:chloroplast;CC:chloroplast;MF:monooxygenase activity;MF:ribulose-bisphosphate carboxylase activity;MF:monooxygenase activity;MF:ribulose-bisphosphate carboxylase activity;	K01602	rbcS	map00630;map00710	Glyoxylate and dicarboxylate metabolism;Carbon fixation in photosynthetic organisms	COG4451	C:Energy production and conversion	gi|3914574|sp|O22572.1|RBS2_FRIAG;	RecName: Full=Ribulose bisphosphate carboxylase small chain 2, chloroplastic; Short=RuBisCO small subunit 2; Flags: Precursor;	PF00101.17;PF12338.5	RuBisCO_small;RbcS	Ribulose bisphosphate carboxylase, small chain;Ribulose-1,5-bisphosphate carboxylase small subunit
TRINITY_DN59030_c0_g1	994	39.975	18.95	10.38		------	------	------	------	------	------	------	------	------	------	------	------	------
TRINITY_DN59054_c0_g1	3156	10.06	1.01	1.93	uncharacterized protein LOC109823734 [Asparagus officinalis]	------	------	------	------	------	------	------	------	gi|45477041|sp|P92519.1|M810_ARATH;	RecName: Full=Uncharacterized mitochondrial protein AtMg00810; AltName: Full=ORF240b;	------	------	------
TRINITY_DN59072_c0_g2	1304	112.355	34.965	17.175	polygalacturonase inhibitor-like [Asparagus officinalis]	------	------	------	------	------	------	------	------	gi|464367|sp|Q05091.1|PGIP_PYRCO;	RecName: Full=Polygalacturonase inhibitor; AltName: Full=Polygalacturonase-inhibiting protein; Short=PGIG; Flags: Precursor;	PF13855.3;PF12799.4;PF08263.9	LRR_8;LRR_4;LRRNT_2	Leucine rich repeat;Leucine Rich repeats;Leucine rich repeat N-terminal domain
TRINITY_DN59072_c0_g3	744	1.205	24.135	35.735	polygalacturonase inhibitor-like [Asparagus officinalis]	------	------	------	------	------	------	------	------	gi|464367|sp|Q05091.1|PGIP_PYRCO;	RecName: Full=Polygalacturonase inhibitor; AltName: Full=Polygalacturonase-inhibiting protein; Short=PGIG; Flags: Precursor;	PF13855.3;PF12799.4	LRR_8;LRR_4	Leucine rich repeat;Leucine Rich repeats
TRINITY_DN59087_c3_g2	1880	6.125	4.57	0.55		------	------	------	------	------	------	------	------	------	------	------	------	------
TRINITY_DN59158_c7_g1	1561	0.105	0.235	2.95		------	------	------	------	------	------	------	------	------	------	------	------	------
TRINITY_DN59168_c6_g1	710	105.045	35.62	12.99	acyl-ACP thioesterase [Iris tectorum]	GO:0006633;GO:0006633;GO:0006633;GO:0006633;GO:0009507;GO:0009507;GO:0009507;GO:0009507;GO:0016790;GO:0016790;GO:0016790;GO:0016790	BP:fatty acid biosynthetic process;BP:fatty acid biosynthetic process;BP:fatty acid biosynthetic process;BP:fatty acid biosynthetic process;CC:chloroplast;CC:chloroplast;CC:chloroplast;CC:chloroplast;MF:thiolester hydrolase activity;MF:thiolester hydrolase activity;MF:thiolester hydrolase activity;MF:thiolester hydrolase activity;	K10781	FATB	map00061	Fatty acid biosynthesis	------	------	gi|8469217|sp|Q39513.1|FATB_CUPHO;	RecName: Full=Palmitoyl-acyl carrier protein thioesterase, chloroplastic; AltName: Full=16:0-acyl-carrier protein thioesterase; Short=16:0-ACP thioesterase; AltName: Full=Acyl-[acyl-carrier-protein] hydrolase; AltName: Full=PATE; Flags: Precursor [Cuphea hookeriana];	PF12590.5;PF01643.14	Acyl-thio_N;Acyl-ACP_TE	Acyl-ATP thioesterase;Acyl-ACP thioesterase
TRINITY_DN59184_c1_g1	911	0	1.145	2.195		------	------	------	------	------	------	------	------	------	------	------	------	------
TRINITY_DN59248_c4_g1	3290	1.885	0.455	9.295	uncharacterized protein LOC109840218 isoform X1 [Asparagus officinalis]	------	------	------	------	------	------	------	------	------	------	------	------	------
TRINITY_DN59250_c6_g1	2508	3.045	0.265	0.11		------	------	------	------	------	------	------	------	------	------	------	------	------
TRINITY_DN59278_c0_g3	3189	76.15	16.705	11.19	uncharacterized protein LOC109819575 [Asparagus officinalis]	GO:0005516;GO:0005516	MF:calmodulin binding;MF:calmodulin binding;	------	------	------	------	------	------	------	------	------	------	------
TRINITY_DN59313_c2_g2	1285	0.235	0.375	6.03	GDSL esterase/lipase At2g23540-like [Asparagus officinalis]	GO:0016788	MF:hydrolase activity, acting on ester bonds;	------	------	------	------	------	------	gi|75099763|sp|O80470.1|GDL38_ARATH;	RecName: Full=GDSL esterase/lipase At2g23540; AltName: Full=Extracellular lipase At2g23540; Flags: Precursor;	PF00657.19	Lipase_GDSL	GDSL-like Lipase/Acylhydrolase
TRINITY_DN59323_c3_g2	1268	5.31	92.06	105.645	PREDICTED: probable xyloglucan endotransglucosylase/hydrolase protein 32 [Elaeis guineensis]	------	------	K08235	E2.4.1.207	------	------	------	------	gi|38605514|sp|Q9SJL9.1|XTH32_ARATH;	RecName: Full=Probable xyloglucan endotransglucosylase/hydrolase protein 32; Short=At-XTH32; Short=XTH-32; Flags: Precursor;	PF00722.18;PF06955.9	Glyco_hydro_16;XET_C	Glycosyl hydrolases family 16;Xyloglucan endo-transglycosylase
TRINITY_DN59330_c0_g1	608	11.03	1.245	0.26	Ethylene-responsive transcription factor ERF112 [Dendrobium catenatum]	GO:0006351;GO:0006351;GO:0005634;GO:0005634;GO:0003677;GO:0003700;GO:0003677;GO:0003700	BP:transcription, DNA-templated;BP:transcription, DNA-templated;CC:nucleus;CC:nucleus;MF:DNA binding;MF:transcription factor activity, sequence-specific DNA binding;MF:DNA binding;MF:transcription factor activity, sequence-specific DNA binding;	------	------	------	------	------	------	gi|156633603|sp|Q7G1L2.2|RAP26_ARATH;	RecName: Full=Ethylene-responsive transcription factor RAP2-6; AltName: Full=Protein RELATED TO APETALA2 6;	PF00847.17	AP2	AP2 domain
TRINITY_DN59365_c4_g7	447	16.37	78.87	142.145	PREDICTED: ethylene-responsive transcription factor ERF053-like [Musa acuminata subsp. malaccensis]	GO:0006351;GO:0005634;GO:0003677;GO:0003700	BP:transcription, DNA-templated;CC:nucleus;MF:DNA binding;MF:transcription factor activity, sequence-specific DNA binding;	------	------	------	------	------	------	gi|75266005|sp|Q9SKT1.1|ERF53_ARATH;	RecName: Full=Ethylene-responsive transcription factor ERF053;	PF00847.17	AP2	AP2 domain
TRINITY_DN59367_c4_g1	4847	2.625	0.99	0.855		------	------	------	------	------	------	------	------	------	------	------	------	------
TRINITY_DN59380_c0_g4	533	33.06	0.325	1.68	PREDICTED: 7-deoxyloganetin glucosyltransferase-like [Elaeis guineensis]	GO:0008152;GO:0008152;GO:0008152;GO:0008152;GO:0016758;GO:0016758;GO:0016758;GO:0016758	BP:metabolic process;BP:metabolic process;BP:metabolic process;BP:metabolic process;MF:transferase activity, transferring hexosyl groups;MF:transferase activity, transferring hexosyl groups;MF:transferase activity, transferring hexosyl groups;MF:transferase activity, transferring hexosyl groups;	K21374	UGT85A	------	------	------	------	gi|678019175|sp|F8WLS6.1|UGT6_CATRO;	RecName: Full=7-deoxyloganetin glucosyltransferase; AltName: Full=Iridoid 1-O-glucosyltransferase; AltName: Full=UDP-glucose glucosyltransferase 6; Short=CrUGT6; AltName: Full=UDP-glycosyltransferase 85A23;	PF00201.15	UDPGT	UDP-glucoronosyl and UDP-glucosyl transferase
TRINITY_DN59380_c0_g6	610	0.215	13.965	51.62	uncharacterized protein A4U43_C03F18380 [Asparagus officinalis]	GO:0008152;GO:0008152;GO:0008152;GO:0016758;GO:0016758;GO:0016758	BP:metabolic process;BP:metabolic process;BP:metabolic process;MF:transferase activity, transferring hexosyl groups;MF:transferase activity, transferring hexosyl groups;MF:transferase activity, transferring hexosyl groups;	K21374	UGT85A	------	------	------	------	gi|75292644|sp|Q6VAB3.1|U85A8_STERE;	RecName: Full=UDP-glycosyltransferase 85A8;	PF00201.15	UDPGT	UDP-glucoronosyl and UDP-glucosyl transferase
TRINITY_DN59393_c3_g1	1432	19.715	5.47	1.875		------	------	------	------	------	------	------	------	------	------	------	------	------
TRINITY_DN59393_c3_g2	879	28.96	7.61	0.14		------	------	------	------	------	------	------	------	------	------	------	------	------
TRINITY_DN59393_c3_g3	1035	29.155	8.675	0.055		------	------	------	------	------	------	------	------	------	------	------	------	------
TRINITY_DN59412_c6_g2	2072	0.86	9.475	13.155	PREDICTED: EID1-like F-box protein 3 [Elaeis guineensis]	------	------	------	------	------	------	------	------	gi|75163822|sp|Q93ZT5.1|EDL3_ARATH;	RecName: Full=EID1-like F-box protein 3;	PF12937.4;PF13408.3	F-box-like;Zn_ribbon_recom	F-box-like;Recombinase zinc beta ribbon domain
TRINITY_DN59420_c0_g1	1070	1.055	0.225	40.355	PREDICTED: alkane hydroxylase MAH1-like [Nelumbo nucifera]	GO:0020037;GO:0005506;GO:0004497;GO:0016705;GO:0020037;GO:0005506;GO:0004497;GO:0016705	MF:heme binding;MF:iron ion binding;MF:monooxygenase activity;MF:oxidoreductase activity, acting on paired donors, with incorporation or reduction of molecular oxygen;MF:heme binding;MF:iron ion binding;MF:monooxygenase activity;MF:oxidoreductase activity, acting on paired donors, with incorporation or reduction of molecular oxygen;	------	------	------	------	------	------	gi|75309839|sp|Q9FVS9.1|C96AF_ARATH;	RecName: Full=Alkane hydroxylase MAH1; AltName: Full=Cytochrome P450 96A15; AltName: Full=Protein MID-CHAIN ALKANE HYDROXYLASE 1;	PF00067.19	p450	Cytochrome P450
TRINITY_DN59424_c4_g2	773	0	0.91	4.16	aquaporin NIP3-1 [Phalaenopsis equestris]	GO:0016021;GO:0015267	CC:integral component of membrane;MF:channel activity;	K09874	NIP	------	------	------	------	gi|32363434|sp|Q9SV84.1|NIP51_ARATH;	RecName: Full=Probable aquaporin NIP5-1; AltName: Full=NOD26-like intrinsic protein 5-1; Short=AtNIP5;1; AltName: Full=Nodulin-26-like major intrinsic protein 6; Short=NodLikeMip6; Short=Protein NLM6;	PF00230.17	MIP	Major intrinsic protein
TRINITY_DN59454_c6_g1	1189	7.87	5.365	0		------	------	------	------	------	------	------	------	------	------	------	------	------
TRINITY_DN59454_c7_g4	781	0	0.885	4.36		------	------	------	------	------	------	------	------	------	------	------	------	------
TRINITY_DN59464_c2_g1	965	942.66	325.435	137.51	late embryogenesis abundant protein 7-like [Asparagus officinalis]	------	------	------	------	------	------	------	------	gi|126079|sp|P13934.2|LEA76_BRANA;	RecName: Full=Late embryogenesis abundant protein 76; Short=LEA 76;	------	------	------
TRINITY_DN59472_c5_g1	1498	0.41	1.375	3.77	putative F-box protein At1g50870 [Asparagus officinalis]	------	------	------	------	------	------	------	------	gi|75268184|sp|Q9C627.1|FB36_ARATH;	RecName: Full=Putative F-box protein At1g46984;	PF00646.30;PF12937.4	F-box;F-box-like	F-box domain;F-box-like
TRINITY_DN59474_c1_g1	2721	25.31	7.785	6.32	PREDICTED: MACPF domain-containing protein CAD1 [Elaeis guineensis]	------	------	------	------	------	------	------	------	gi|75169350|sp|Q9C7N2.1|CAD1_ARATH;	RecName: Full=MACPF domain-containing protein CAD1; AltName: Full=Protein CONSTITUTIVELY ACTIVATED CELL DEATH 1; Short=Protein CAD1;	PF01823.16	MACPF	MAC/Perforin domain
TRINITY_DN59487_c1_g1	802	3.335	69.78	49.24	Recombination protein like [Actinidia chinensis var. chinensis]	------	------	------	------	------	------	------	------	------	------	------	------	------
TRINITY_DN59505_c2_g1	828	5.175	0.415	0.195	PREDICTED: uncharacterized protein LOC103981588 [Musa acuminata subsp. malaccensis]	------	------	------	------	------	------	------	------	------	------	------	------	------
TRINITY_DN59519_c0_g2	2075	0.75	0.91	0	uncharacterized protein LOC109831095 [Asparagus officinalis]	------	------	------	------	------	------	------	------	------	------	------	------	------
TRINITY_DN59519_c0_g7	1010	2.215	2.13	0.03		------	------	------	------	------	------	------	------	------	------	------	------	------
TRINITY_DN59523_c3_g1	1234	0.025	2.33	6.06		------	------	------	------	------	------	------	------	------	------	------	------	------
TRINITY_DN59553_c3_g2	697	25.37	96.9	5824.26		------	------	------	------	------	------	------	------	------	------	------	------	------
TRINITY_DN59615_c2_g4	1543	2.015	0.705	11.51	protein OSB2, chloroplastic-like [Asparagus officinalis]	GO:0003697;GO:0003697	MF:single-stranded DNA binding;MF:single-stranded DNA binding;	------	------	------	------	------	------	gi|75337810|sp|Q9SX99.1|OSB1_ARATH;	RecName: Full=Protein OSB1, mitochondrial; AltName: Full=Organellar single-stranded DNA-binding protein 1; Flags: Precursor;	PF00436.22	SSB	Single-strand binding protein family
TRINITY_DN59622_c3_g1	1454	0.04	1.385	2.795	cyclin-dependent kinase B2-1-like [Ananas comosus]	GO:0005524;GO:0004674;GO:0005524;GO:0004674;GO:0005524;GO:0004672	MF:ATP binding;MF:protein serine/threonine kinase activity;MF:ATP binding;MF:protein serine/threonine kinase activity;MF:ATP binding;MF:protein kinase activity;	K07760	CDK	------	------	------	------	gi|152013425|sp|Q8LG64.2|CKB22_ARATH;	RecName: Full=Cyclin-dependent kinase B2-2; Short=CDKB2;2;	------	------	------
TRINITY_DN59644_c3_g1	779	72.785	3.495	11.18	PREDICTED: methylecgonone reductase-like [Nelumbo nucifera]	GO:0016491;GO:0016491;GO:0016491;GO:0016491	MF:oxidoreductase activity;MF:oxidoreductase activity;MF:oxidoreductase activity;MF:oxidoreductase activity;	------	------	------	------	------	------	gi|75266185|sp|Q9SQ64.1|COR2_PAPSO;	RecName: Full=Non-functional NADPH-dependent codeinone reductase 2;	PF00248.18	Aldo_ket_red	Aldo/keto reductase family
TRINITY_DN59644_c3_g2	770	54.08	2.155	4.98	PREDICTED: methylecgonone reductase-like [Vitis vinifera]	GO:0016491	MF:oxidoreductase activity;	------	------	------	------	------	------	gi|75266185|sp|Q9SQ64.1|COR2_PAPSO;	RecName: Full=Non-functional NADPH-dependent codeinone reductase 2;	PF00248.18	Aldo_ket_red	Aldo/keto reductase family
TRINITY_DN59651_c0_g1	342	37.685	0.295	0.88		------	------	------	------	------	------	------	------	------	------	------	------	------
TRINITY_DN59686_c2_g1	2269	0.515	0.76	2.81	mediator of RNA polymerase II transcription subunit 36a [Medicago truncatula]	GO:0006364;GO:0006364;GO:0006364;GO:0016021;GO:0008168;GO:0003723;GO:0008168;GO:0003723;GO:0008168;GO:0003723	BP:rRNA processing;BP:rRNA processing;BP:rRNA processing;CC:integral component of membrane;MF:methyltransferase activity;MF:RNA binding;MF:methyltransferase activity;MF:RNA binding;MF:methyltransferase activity;MF:RNA binding;	------	------	------	------	------	------	gi|67461076|sp|Q9FEF8.1|MD36B_ARATH;	RecName: Full=Probable mediator of RNA polymerase II transcription subunit 36b; AltName: Full=Histone-glutamine methyltransferase; AltName: Full=SKP1-interacting partner 7; AltName: Full=rRNA 2'-O-methyltransferase fibrillarin 1;	PF01269.14	Fibrillarin	Fibrillarin
TRINITY_DN59711_c1_g2	920	0.14	0.41	4.965	PREDICTED: uncharacterized protein LOC105052224 [Elaeis guineensis]	------	------	------	------	------	------	------	------	------	------	------	------	------
TRINITY_DN59723_c2_g1	1833	139.885	9	7.775	uncharacterized protein A4U43_C08F9820 [Asparagus officinalis]	GO:0004385	MF:guanylate kinase activity;	K00942	E2.7.4.8, gmk	map00230	Purine metabolism	COG0194	F:Nucleotide transport and metabolism	gi|122248570|sp|Q2QPW1.2|GMK1_ORYSJ;	RecName: Full=Guanylate kinase 1; Short=OsGK1; AltName: Full=GMP kinase 1;	PF00625.18;PF13964.3;PF01344.22;PF07646.12;PF13418.3;PF13191.3	Guanylate_kin;Kelch_6;Kelch_1;Kelch_2;Kelch_4;AAA_16	Guanylate kinase;Kelch motif;Kelch motif;Kelch motif;Galactose oxidase, central domain;AAA ATPase domain
TRINITY_DN59731_c1_g2	1026	6.57	1.84	0.03	transcription factor HEC1-like [Dendrobium catenatum]	GO:0046983	MF:protein dimerization activity;	------	------	------	------	------	------	gi|75309085|sp|Q9FHA7.1|HEC1_ARATH;	RecName: Full=Transcription factor HEC1; AltName: Full=Basic helix-loop-helix protein 88; Short=AtbHLH88; Short=bHLH 88; AltName: Full=Protein HECATE 1; AltName: Full=Transcription factor EN 118; AltName: Full=bHLH transcription factor bHLH088;	PF00010.23	HLH	Helix-loop-helix DNA-binding domain
TRINITY_DN59733_c4_g1	5007	16.5	1.63	1.585	uncharacterized protein A4U43_C05F6990 [Asparagus officinalis]	GO:0020037;GO:0005506;GO:0016705;GO:0020037;GO:0005506;GO:0004497;GO:0016705	MF:heme binding;MF:iron ion binding;MF:oxidoreductase activity, acting on paired donors, with incorporation or reduction of molecular oxygen;MF:heme binding;MF:iron ion binding;MF:monooxygenase activity;MF:oxidoreductase activity, acting on paired donors, with incorporation or reduction of molecular oxygen;	------	------	------	------	------	------	gi|403399720|sp|B5BSX1.1|BAMO_GLYUR;	RecName: Full=Beta-amyrin 11-oxidase; AltName: Full=Cytochrome P450 88D6 [Glycyrrhiza uralensis];	PF00067.19	p450	Cytochrome P450
TRINITY_DN59835_c0_g2	1590	76.42	21.79	12.755	uncharacterized protein A4U43_C08F24140, partial [Asparagus officinalis]	------	------	------	------	------	------	------	------	gi|292630860|sp|B9DFI7.2|PMT2_ARATH;	RecName: Full=Probable methyltransferase PMT2;	PF03141.13	Methyltransf_29	Putative S-adenosyl-L-methionine-dependent methyltransferase
TRINITY_DN59903_c5_g2	1861	3.09	0.815	0.3	pto-interacting protein 1-like isoform X1 [Asparagus officinalis]	GO:0005524;GO:0004674;GO:0005524;GO:0004674;GO:0005524;GO:0004674	MF:ATP binding;MF:protein serine/threonine kinase activity;MF:ATP binding;MF:protein serine/threonine kinase activity;MF:ATP binding;MF:protein serine/threonine kinase activity;	K13436	PTI1	map04626	Plant-pathogen interaction	------	------	gi|75319610|sp|Q41328.2|PTI1_SOLLC;	RecName: Full=Pto-interacting protein 1; Short=Pti1; AltName: Full=Pto kinase interactor 1;	PF07714.14;PF00069.22	Pkinase_Tyr;Pkinase	Protein tyrosine kinase;Protein kinase domain
TRINITY_DN59917_c4_g1	3933	0.135	0.145	1.465		------	------	------	------	------	------	------	------	------	------	------	------	------
TRINITY_DN59944_c1_g2	1028	2.065	7.34	46.18	PREDICTED: thaumatin-like protein 1b [Musa acuminata subsp. malaccensis]	------	------	------	------	------	------	------	------	gi|30316292|sp|Q9FSG7.1|TP1A_MALDO;	RecName: Full=Thaumatin-like protein 1a; AltName: Full=Mdtl1; AltName: Full=Pathogenesis-related protein 5a; Short=PR-5a; AltName: Allergen=Mal d 2; Flags: Precursor;	PF00314.14;PF16483.2	Thaumatin;Glyco_hydro_64	Thaumatin family;Beta-1,3-glucanase
TRINITY_DN59963_c2_g3	495	242.27	58.81	37.21	LOW QUALITY PROTEIN: cytochrome P450 94C1 [Phalaenopsis equestris]	GO:0016021;GO:0020037;GO:0005506;GO:0016705	CC:integral component of membrane;MF:heme binding;MF:iron ion binding;MF:oxidoreductase activity, acting on paired donors, with incorporation or reduction of molecular oxygen;	------	------	------	------	------	------	gi|75315929|sp|Q9ZUX1.1|C94C1_ARATH;	RecName: Full=Cytochrome P450 94C1;	------	------	------
TRINITY_DN59983_c5_g1	1535	2.825	4.86	15.515	PREDICTED: uncharacterized protein LOC103715279 isoform X3 [Phoenix dactylifera]	------	------	------	------	------	------	------	------	------	------	PF00300.19	His_Phos_1	Histidine phosphatase superfamily
TRINITY_DN60041_c8_g1	1521	3.37	0.37	0.165		------	------	------	------	------	------	------	------	------	------	------	------	------
TRINITY_DN60058_c1_g1	3069	0.375	1.165	2.325	MADS box protein 3a [Agave tequilana]	GO:0045944;GO:0006351;GO:0045944;GO:0006351;GO:0045944;GO:0006351;GO:0045944;GO:0006351;GO:0005634;GO:0005634;GO:0005634;GO:0005634;GO:0046983;GO:0000977;GO:0003700;GO:0046983;GO:0000977;GO:0003700;GO:0046983;GO:0000977;GO:0003700;GO:0046983;GO:0000977	BP:positive regulation of transcription from RNA polymerase II promoter;BP:transcription, DNA-templated;BP:positive regulation of transcription from RNA polymerase II promoter;BP:transcription, DNA-templated;BP:positive regulation of transcription from RNA polymerase II promoter;BP:transcription, DNA-templated;BP:positive regulation of transcription from RNA polymerase II promoter;BP:transcriptio…	K09264	K09264	------	------	------	------	gi|3912987|sp|O22328.1|AGL8_SOLCO;	RecName: Full=Agamous-like MADS-box protein AGL8 homolog;	PF00319.15	SRF-TF	SRF-type transcription factor
TRINITY_DN60095_c1_g1	636	11.815	7.175	0.36		------	------	------	------	------	------	------	------	------	------	------	------	------
TRINITY_DN60135_c3_g2	841	0	1.89	4.035	carbonic anhydrase, chloroplastic-like [Asparagus officinalis]	------	------	------	------	------	------	------	------	gi|1168740|sp|P46513.1|CAH2_FLALI;	RecName: Full=Carbonic anhydrase 2; AltName: Full=Carbonate dehydratase 2;	------	------	------
TRINITY_DN60198_c0_g1	1496	0.105	0.555	10.65	PREDICTED: WAT1-related protein At5g07050-like [Phoenix dactylifera]	GO:0016021;GO:0016021;GO:0022857;GO:0022857	CC:integral component of membrane;CC:integral component of membrane;MF:transmembrane transporter activity;MF:transmembrane transporter activity;	------	------	------	------	------	------	gi|75171397|sp|Q9FL41.1|WTR38_ARATH;	RecName: Full=WAT1-related protein At5g07050;	PF00892.17	EamA	EamA-like transporter family
TRINITY_DN60221_c3_g1	1137	4.4	0.085	0.085	putative 12-oxophytodienoate reductase 11 [Amborella trichopoda]	GO:0010181;GO:0016491;GO:0010181;GO:0016491;GO:0010181;GO:0016491	MF:FMN binding;MF:oxidoreductase activity;MF:FMN binding;MF:oxidoreductase activity;MF:FMN binding;MF:oxidoreductase activity;	K05894	OPR	map00592	alpha-Linolenic acid metabolism	------	------	gi|338818374|sp|B9FSC8.1|OPR11_ORYSJ;	RecName: Full=Putative 12-oxophytodienoate reductase 11; AltName: Full=OPDA-reductase 11; Short=OsOPR11;	PF00724.17	Oxidored_FMN	NAD
TRINITY_DN60221_c3_g4	984	2.12	0	0	12-oxophytodienoate reductase 2 isoform X2 [Prunus persica]	GO:0010181;GO:0016491;GO:0010181;GO:0016491	MF:FMN binding;MF:oxidoreductase activity;MF:FMN binding;MF:oxidoreductase activity;	K05894	OPR	map00592	alpha-Linolenic acid metabolism	------	------	gi|338818374|sp|B9FSC8.1|OPR11_ORYSJ;	RecName: Full=Putative 12-oxophytodienoate reductase 11; AltName: Full=OPDA-reductase 11; Short=OsOPR11;	------	------	------
TRINITY_DN60231_c5_g3	3059	24.48	4.17	1.785	3-oxoacyl-[acyl-carrier-protein] synthase I, chloroplastic, partial [Asparagus officinalis]	GO:0006633;GO:0006633;GO:0006633;GO:0016747;GO:0016747;GO:0016747	BP:fatty acid biosynthetic process;BP:fatty acid biosynthetic process;BP:fatty acid biosynthetic process;MF:transferase activity, transferring acyl groups other than amino-acyl groups;MF:transferase activity, transferring acyl groups other than amino-acyl groups;MF:transferase activity, transferring acyl groups other than amino-acyl groups;	K09458	fabF	map00780;map00061	Biotin metabolism;Fatty acid biosynthesis	COG0304	I:Lipid transport and metabolism	gi|119784|sp|P23902.1|KASC1_HORVU;	RecName: Full=3-oxoacyl-[acyl-carrier-protein] synthase I, chloroplastic; AltName: Full=Beta-ketoacyl-ACP synthase I; Short=KAS I; Flags: Precursor;	PF00109.23;PF02801.19;PF00108.20	ketoacyl-synt;Ketoacyl-synt_C;Thiolase_N	Beta-ketoacyl synthase, N-terminal domain;Beta-ketoacyl synthase, C-terminal domain;Thiolase, N-terminal domain
TRINITY_DN60244_c3_g1	1449	65.58	19.865	15.35	PREDICTED: uncharacterized protein LOC105040818 [Elaeis guineensis]	GO:0016021;GO:0016021;GO:0016021;GO:0016021	CC:integral component of membrane;CC:integral component of membrane;CC:integral component of membrane;CC:integral component of membrane;	------	------	------	------	------	------	------	------	PF01925.16	TauE	Sulfite exporter TauE/SafE
TRINITY_DN60292_c5_g5	1509	1.96	0.035	0.15		------	------	------	------	------	------	------	------	------	------	------	------	------
TRINITY_DN60313_c2_g1	1007	1.78	0.36	0.06		------	------	------	------	------	------	------	------	------	------	------	------	------
TRINITY_DN60357_c4_g1	828	8.07	57.82	105.355	Copper centre C	GO:0016020;GO:0005507;GO:0004129	CC:membrane;MF:copper ion binding;MF:cytochrome-c oxidase activity;	------	------	------	------	------	------	------	------	------	------	------
TRINITY_DN60390_c4_g2	979	5.165	9.33	23.25	PREDICTED: GATA transcription factor 1-like [Elaeis guineensis]	GO:0003700;GO:0043565;GO:0008270;GO:0003700;GO:0043565;GO:0008270	MF:transcription factor activity, sequence-specific DNA binding;MF:sequence-specific DNA binding;MF:zinc ion binding;MF:transcription factor activity, sequence-specific DNA binding;MF:sequence-specific DNA binding;MF:zinc ion binding;	------	------	------	------	COG5641	K:Transcription	gi|62900367|sp|Q8LAU9.2|GATA1_ARATH;	RecName: Full=GATA transcription factor 1; Short=AtGATA-1;	------	------	------
TRINITY_DN60400_c1_g6	2121	0.155	3.695	12.66		------	------	------	------	------	------	------	------	------	------	------	------	------
TRINITY_DN60404_c1_g2	2870	10.67	8.655	2.24	PREDICTED: J domain-containing protein required for chloroplast accumulation response 1 isoform X1 [Elaeis guineensis]	------	------	------	------	------	------	------	------	gi|75333582|sp|Q9C9Q4.1|JAC1_ARATH;	RecName: Full=J domain-containing protein required for chloroplast accumulation response 1;	PF00226.28	DnaJ	DnaJ domain
TRINITY_DN60420_c7_g2	2901	15.325	1.515	2.04	PREDICTED: protein SPA1-RELATED 4-like isoform X1 [Phoenix dactylifera]	GO:0005524;GO:0004672	MF:ATP binding;MF:protein kinase activity;	------	------	------	------	------	------	gi|75335085|sp|Q9LJR3.1|SPA3_ARATH;	RecName: Full=Protein SPA1-RELATED 3;	PF00400.29;PF00069.22	WD40;Pkinase	WD domain, G-beta repeat;Protein kinase domain
TRINITY_DN60424_c5_g2	1384	6.31	2	0.715	PREDICTED: 1-acylglycerol-3-phosphate O-acyltransferase-like [Fragaria vesca subsp. vesca]	GO:0016746;GO:0016746	MF:transferase activity, transferring acyl groups;MF:transferase activity, transferring acyl groups;	------	------	------	------	------	------	gi|678000774|sp|Q0J0A4.3|LPAAT_ORYSJ;	RecName: Full=Probable 1-acylglycerol-3-phosphate O-acyltransferase; AltName: Full=Lipid droplet-binding protein CGI-58 homolog;	------	------	------
TRINITY_DN60427_c0_g1	4291	5.94	0.96	0.495	uncharacterized protein LOC109834202 isoform X2 [Asparagus officinalis]	------	------	------	------	------	------	------	------	------	------	------	------	------
TRINITY_DN60462_c0_g5	1330	0.455	1.825	3.7		------	------	------	------	------	------	------	------	------	------	------	------	------
TRINITY_DN60481_c1_g4	376	1169.61	287.815	288.155		------	------	------	------	------	------	------	------	------	------	------	------	------
TRINITY_DN60510_c2_g2	1040	22.78	0.215	0.03		------	------	------	------	------	------	------	------	------	------	------	------	------
TRINITY_DN60537_c1_g2	849	3.265	0	0		------	------	------	------	------	------	------	------	------	------	------	------	------
TRINITY_DN60574_c2_g2	723	5.955	24.105	61.39	PREDICTED: myb family transcription factor PHL7 isoform X1 [Elaeis guineensis]	GO:0006355;GO:0006351;GO:0006355;GO:0006351;GO:0005634;GO:0005634;GO:0003677;GO:0003677	BP:regulation of transcription, DNA-templated;BP:transcription, DNA-templated;BP:regulation of transcription, DNA-templated;BP:transcription, DNA-templated;CC:nucleus;CC:nucleus;MF:DNA binding;MF:DNA binding;	------	------	------	------	------	------	gi|75337328|sp|Q9SJW0.1|PHL7_ARATH;	RecName: Full=Myb family transcription factor PHL7; AltName: Full=Protein PHR1-LIKE 7;	PF14379.3	Myb_CC_LHEQLE	MYB-CC type transfactor, LHEQLE motif
TRINITY_DN60622_c3_g4	892	6.035	2.375	0.095		------	------	------	------	------	------	------	------	------	------	------	------	------
TRINITY_DN60634_c2_g2	1024	0	0.975	1.405		------	------	------	------	------	------	------	------	------	------	------	------	------
TRINITY_DN60675_c1_g1	656	41.405	2.485	8.71	PREDICTED: uncharacterized protein LOC105045033 [Elaeis guineensis]	GO:0005783	CC:endoplasmic reticulum;	------	------	------	------	------	------	------	------	------	------	------
TRINITY_DN60727_c4_g3	1617	0	1.805	1.805	somatic embryogenesis receptor kinase 2 [Chenopodium quinoa]	GO:0007165;GO:0007165;GO:0007165;GO:0016021;GO:0016021;GO:0016021;GO:0016021;GO:0005524;GO:0004672;GO:0005102;GO:0005524;GO:0005102;GO:0004714;GO:0005524;GO:0004672;GO:0005102;GO:0005524;GO:0004672;GO:0005102	BP:signal transduction;BP:signal transduction;BP:signal transduction;CC:integral component of membrane;CC:integral component of membrane;CC:integral component of membrane;CC:integral component of membrane;MF:ATP binding;MF:protein kinase activity;MF:receptor binding;MF:ATP binding;MF:receptor binding;MF:transmembrane receptor protein tyrosine kinase activity;MF:ATP binding;MF:protein kinase activ…	K13418	SERK1	------	------	------	------	gi|29427920|sp|Q94F62.2|BAK1_ARATH;	RecName: Full=BRASSINOSTEROID INSENSITIVE 1-associated receptor kinase 1; Short=AtBAK1; Short=BRI1-associated receptor kinase 1; AltName: Full=Protein ELONGATED; AltName: Full=Somatic embryogenesis receptor kinase 3; Short=AtSERK3; AltName: Full=Somatic embryogenesis receptor-like kinase 3; Flags: Precursor;	PF07714.14;PF00069.22	Pkinase_Tyr;Pkinase	Protein tyrosine kinase;Protein kinase domain
TRINITY_DN60737_c9_g1	886	2.84	16.59	19.26		------	------	------	------	------	------	------	------	------	------	------	------	------
TRINITY_DN60761_c3_g4	2210	7.425	3.705	0.645	PREDICTED: probable protein phosphatase 2C 30 [Phoenix dactylifera]	GO:0004722	MF:protein serine/threonine phosphatase activity;	K14497	PP2C	map04016;map04075	MAPK signaling pathway - plant;Plant hormone signal transduction	------	------	gi|223635649|sp|Q0J2L7.2|P2C68_ORYSJ;	RecName: Full=Probable protein phosphatase 2C 68; Short=OsPP2C68;	PF00481.18	PP2C	Protein phosphatase 2C
TRINITY_DN60818_c5_g4	2087	3.525	16.99	17.12		------	------	------	------	------	------	------	------	------	------	------	------	------
TRINITY_DN60840_c2_g3	977	0	1.59	2.285		------	------	------	------	------	------	------	------	------	------	------	------	------
TRINITY_DN60850_c0_g1	1368	5.465	57.445	67.485	trans-resveratrol di-O-methyltransferase-like [Ananas comosus]	GO:0008171;GO:0046983	MF:O-methyltransferase activity;MF:protein dimerization activity;	K16040	ROMT	map00945	Stilbenoid, diarylheptanoid and gingerol biosynthesis	------	------	gi|403399690|sp|B6VJS4.2|ROMT_VITVI;	RecName: Full=Trans-resveratrol di-O-methyltransferase; AltName: Full=Resveratrol O-methyltransferase; Short=ROMT; Short=VvROMT;	PF00891.15;PF08100.8	Methyltransf_2;Dimerisation	O-methyltransferase;Dimerisation domain
TRINITY_DN60865_c6_g2	237	189.9	140.15	0	stromal 70 kDa heat shock-related protein, chloroplastic-like [Asparagus officinalis]	GO:0006457;GO:0006457;GO:0006457;GO:0006457;GO:0005524;GO:0051082;GO:0005524;GO:0051082;GO:0005524;GO:0051082;GO:0005524;GO:0051082	BP:protein folding;BP:protein folding;BP:protein folding;BP:protein folding;MF:ATP binding;MF:unfolded protein binding;MF:ATP binding;MF:unfolded protein binding;MF:ATP binding;MF:unfolded protein binding;MF:ATP binding;MF:unfolded protein binding;	K03283	HSPA1_8	map04144;map04141;map03040	Endocytosis;Protein processing in endoplasmic reticulum;Spliceosome	------	------	gi|399942|sp|Q02028.1|HSP7S_PEA;	RecName: Full=Stromal 70 kDa heat shock-related protein, chloroplastic; Flags: Precursor;	------	------	------
TRINITY_DN60870_c0_g1	3194	9.34	2.725	2.28	outer envelope protein 61-like isoform X2 [Asparagus officinalis]	------	------	------	------	------	------	------	------	gi|357580467|sp|B7ZWR6.1|OEP61_ARATH;	RecName: Full=Outer envelope protein 61; AltName: Full=Tetratricopeptide repeat domain-containing protein 7;	PF00515.25;PF07719.14;PF13181.3;PF13371.3	TPR_1;TPR_2;TPR_8;TPR_9	Tetratricopeptide repeat;Tetratricopeptide repeat;Tetratricopeptide repeat;Tetratricopeptide repeat
TRINITY_DN60894_c2_g2	1685	0.21	0.925	9.695	PREDICTED: uncharacterized protein LOC103493280 isoform X1 [Cucumis melo]	------	------	------	------	------	------	------	------	------	------	PF03004.11	Transposase_24	Plant transposase
TRINITY_DN60895_c1_g1	2469	82.51	7.77	5.76	protein CCA1-like isoform X2 [Asparagus officinalis]	GO:0006355;GO:0006351;GO:0006355;GO:0006351;GO:0005634;GO:0005634;GO:0003677;GO:0003677	BP:regulation of transcription, DNA-templated;BP:transcription, DNA-templated;BP:regulation of transcription, DNA-templated;BP:transcription, DNA-templated;CC:nucleus;CC:nucleus;MF:DNA binding;MF:DNA binding;	K12133	LHY	map04712	Circadian rhythm - plant	------	------	------	------	------	------	------
TRINITY_DN60946_c0_g1	2078	0.335	1.955	3.39	probable sulfate transporter 3.4 [Asparagus officinalis]	GO:0016021;GO:0008271	CC:integral component of membrane;MF:secondary active sulfate transmembrane transporter activity;	K17471	SULTR3	------	------	COG0659	P:Inorganic ion transport and metabolism	gi|37089876|sp|Q9LW86.1|SUT34_ARATH;	RecName: Full=Probable sulfate transporter 3.4;	PF00916.17;PF01740.18;PF13466.3	Sulfate_transp;STAS;STAS_2	Sulfate permease family;STAS domain;STAS domain
TRINITY_DN60961_c1_g5	1430	3.485	0.225	0.375	PREDICTED: oxysterol-binding protein-related protein 3C-like isoform X3 [Phoenix dactylifera]	------	------	------	------	------	------	------	------	gi|75266215|sp|Q9SR33.1|ORP3B_ARATH;	RecName: Full=Oxysterol-binding protein-related protein 3B; AltName: Full=OSBP-related protein 3B;	------	------	------
TRINITY_DN60962_c2_g1	580	7.57	22.48	161.785	CCD4c [Crocus sativus]	GO:0003834;GO:0046872;GO:0046872;GO:0016702;GO:0003834;GO:0046872	MF:beta-carotene 15,15'-monooxygenase activity;MF:metal ion binding;MF:metal ion binding;MF:oxidoreductase activity, acting on single donors with incorporation of molecular oxygen, incorporation of two atoms of oxygen;MF:beta-carotene 15,15'-monooxygenase activity;MF:metal ion binding;	K09840	NCED	map00906	Carotenoid biosynthesis	------	------	gi|75318399|sp|O49675.1|CCD4_ARATH;	RecName: Full=Probable carotenoid cleavage dioxygenase 4, chloroplastic; Short=AtCCD4; AltName: Full=AtNCED4; Flags: Precursor;	------	------	------
TRINITY_DN61064_c4_g3	729	13.255	42.825	0.095	PREDICTED: uncharacterized protein LOC103717683 [Phoenix dactylifera]	------	------	------	------	------	------	------	------	------	------	------	------	------
TRINITY_DN61073_c1_g3	593	277.61	21.735	14.055	ABC transporter G family member 39 [Asparagus officinalis]	GO:0016021;GO:0005524;GO:0016887	CC:integral component of membrane;MF:ATP binding;MF:ATPase activity;	------	------	------	------	------	------	gi|75328828|sp|Q8GU88.1|AB39G_ORYSJ;	RecName: Full=ABC transporter G family member 39; Short=OsABCG39; AltName: Full=Pleiotropic drug resistance protein 7; Short=OsPDR7;	------	------	------
TRINITY_DN61114_c2_g3	4184	20.3	2.71	2.345	uncharacterized protein A4U43_C05F27150 [Asparagus officinalis]	------	------	K09060	GBF	------	------	------	------	gi|1169081|sp|Q99089.1|CPRF1_PETCR;	RecName: Full=Common plant regulatory factor 1; Short=CPRF-1;	PF00170.18;PF16596.2;PF07777.8	bZIP_1;MFMR_assoc;MFMR	bZIP transcription factor;Disordered region downstream of MFMR;G-box binding protein MFMR
TRINITY_DN61122_c0_g1	2335	0.265	1.125	2.145	BTB/POZ domain-containing protein At1g03010 [Ananas comosus]	------	------	------	------	------	------	------	------	gi|75200292|sp|Q9SA69.1|Y1301_ARATH;	RecName: Full=BTB/POZ domain-containing protein At1g03010;	PF03000.11;PF00651.28	NPH3;BTB	NPH3 family;BTB/POZ domain
TRINITY_DN61157_c3_g6	4171	0.065	0.705	1.23	hypothetical protein VITISV_012765 [Vitis vinifera]	GO:0015074;GO:0015074;GO:0015074;GO:0015074;GO:0003676;GO:0003676;GO:0003676;GO:0003676	BP:DNA integration;BP:DNA integration;BP:DNA integration;BP:DNA integration;MF:nucleic acid binding;MF:nucleic acid binding;MF:nucleic acid binding;MF:nucleic acid binding;	K20477	RGP1	------	------	------	------	gi|130582|sp|P10978.1|POLX_TOBAC;	RecName: Full=Retrovirus-related Pol polyprotein from transposon TNT 1-94; Includes: RecName: Full=Protease; Includes: RecName: Full=Reverse transcriptase; Includes: RecName: Full=Endonuclease;	------	------	------
TRINITY_DN61204_c1_g2	2412	71.465	32.135	12.39		------	------	------	------	------	------	------	------	------	------	------	------	------
TRINITY_DN61252_c4_g2	678	124.595	36.475	24.565	PREDICTED: protein ENHANCED DISEASE RESISTANCE 4 isoform X1 [Elaeis guineensis]	------	------	------	------	------	------	------	------	gi|75170629|sp|Q9FHK4.1|Y5519_ARATH;	RecName: Full=Uncharacterized protein At5g05190;	------	------	------
TRINITY_DN61271_c5_g1	2212	0.035	0.515	0.97		------	------	------	------	------	------	------	------	------	------	------	------	------
TRINITY_DN61290_c2_g3	1012	4.61	17.015	50.47	PREDICTED: uncharacterized protein LOC105053881 [Elaeis guineensis]	GO:0016021	CC:integral component of membrane;	------	------	------	------	------	------	------	------	PF04982.10	HPP	HPP family
TRINITY_DN61296_c3_g1	3549	0.025	1.155	5.575	PREDICTED: putative disease resistance protein RGA3 [Elaeis guineensis]	GO:0043531;GO:0043531	MF:ADP binding;MF:ADP binding;	------	------	------	------	------	------	gi|29839649|sp|Q9LRR4.1|R13L1_ARATH;	RecName: Full=Putative disease resistance RPP13-like protein 1;	PF00931.19;PF12799.4;PF13855.3;PF05729.9	NB-ARC;LRR_4;LRR_8;NACHT	NB-ARC domain;Leucine Rich repeats;Leucine rich repeat;NACHT domain
TRINITY_DN61318_c3_g6	1059	0	4.905	6.34		------	------	------	------	------	------	------	------	------	------	------	------	------
TRINITY_DN61332_c1_g1	822	0	3.8	5.77		------	------	------	------	------	------	------	------	------	------	------	------	------
TRINITY_DN61335_c0_g3	1220	5.915	0.11	0.195	uncharacterized protein A4U43_C05F19150 [Asparagus officinalis]	------	------	------	------	------	------	------	------	gi|75172668|sp|Q9FVS1.1|FBK23_ARATH;	RecName: Full=F-box/kelch-repeat protein At1g57790;	PF03478.15	DUF295	Protein of unknown function
TRINITY_DN61391_c3_g2	1037	0.12	1.845	6.325	uncharacterized protein A4U43_C01F33340 [Asparagus officinalis]	GO:0008168;GO:0008168	MF:methyltransferase activity;MF:methyltransferase activity;	K10277	KDM8, JMJD5	------	------	------	------	gi|75158737|sp|Q8RWR1.1|JMJ30_ARATH;	RecName: Full=Lysine-specific demethylase JMJ30; Short=AtJMJ30; AltName: Full=JmjC domain-containing protein 30; AltName: Full=Jumonji domain-containing protein 5; Short=AtJMJD5;	------	------	------
TRINITY_DN61392_c4_g1	2051	110.36	37.865	25.015	probable zinc metallopeptidase EGY3, chloroplastic [Asparagus officinalis]	GO:0009408;GO:0009644;GO:0042542;GO:0016021;GO:0016021	BP:response to heat;BP:response to high light intensity;BP:response to hydrogen peroxide;CC:integral component of membrane;CC:integral component of membrane;	------	------	------	------	COG0750	M:Cell wall/membrane/envelope biogenesis	gi|615895994|sp|A2XLM6.1|EGY3_ORYSI;	RecName: Full=Probable zinc metalloprotease EGY3, chloroplastic; AltName: Full=Protein ETHYLENE-DEPENDENT GRAVITROPISM-DEFICIENT AND YELLOW-GREEN 3; Flags: Precursor;	PF02163.19	Peptidase_M50	Peptidase family M50
TRINITY_DN61394_c4_g1	2455	124.915	34.66	5.7	PREDICTED: asparagine synthetase [glutamine-hydrolyzing] [Elaeis guineensis]	GO:0006529;GO:0006541;GO:0006529;GO:0006541;GO:0004066;GO:0005524;GO:0004066;GO:0005524	BP:asparagine biosynthetic process;BP:glutamine metabolic process;BP:asparagine biosynthetic process;BP:glutamine metabolic process;MF:asparagine synthas;MF:ATP binding;MF:asparagine synthas;MF:ATP binding;	K01953	asnB, ASNS	map00250	Alanine, aspartate and glutamate metabolism	COG0367	E:Amino acid transport and metabolism	gi|399064|sp|P31752.2|ASNS_ASPOF;	RecName: Full=Asparagine synthetase [glutamine-hydrolyzing]; Short=AS;	PF00733.18;PF13537.3;PF13522.3;PF12481.5	Asn_synthase;GATase_7;GATase_6;DUF3700	Asparagine synthase;Glutamine amidotransferase domain;Glutamine amidotransferase domain;Aluminium induced protein
TRINITY_DN61396_c3_g1	3373	3.925	39.705	116.695	putative LOV domain-containing protein [Xeronema callistemon]	------	------	K12116	FKF1	map04712	Circadian rhythm - plant	------	------	gi|110832734|sp|Q2R2W1.2|ADO3_ORYSJ;	RecName: Full=Adagio-like protein 3;	PF13418.3;PF13415.3;PF13854.3;PF07646.12;PF01344.22;PF00646.30;PF12937.4;PF13426.4;PF00989.22;PF08448.7	Kelch_4;Kelch_3;Kelch_5;Kelch_2;Kelch_1;F-box;F-box-like;PAS_9;PAS;PAS_4	Galactose oxidase, central domain;Galactose oxidase, central domain;Kelch motif;Kelch motif;Kelch motif;F-box domain;F-box-like;PAS domain;PAS fold;PAS fold
TRINITY_DN61414_c7_g1	691	11.685	2.58	1.66		------	------	------	------	------	------	------	------	------	------	------	------	------
TRINITY_DN61438_c5_g1	2806	6.445	1.615	1.485	cytochrome c biogenesis F	------	------	------	------	------	------	------	------	------	------	------	------	------
TRINITY_DN61453_c6_g1	2498	5.71	14.94	33.6	protein PHOSPHATE STARVATION RESPONSE 3 isoform X2 [Asparagus officinalis]	------	------	------	------	------	------	------	------	------	------	PF14379.3	Myb_CC_LHEQLE	MYB-CC type transfactor, LHEQLE motif
TRINITY_DN61461_c2_g1	552	11.495	0.15	0		------	------	------	------	------	------	------	------	------	------	------	------	------
TRINITY_DN61463_c6_g1	1042	0.64	12.52	14.075	PREDICTED: SPX domain-containing protein 5 [Phoenix dactylifera]	GO:0016036;GO:0016036	BP:cellular response to phosphate starvation;BP:cellular response to phosphate starvation;	------	------	------	------	------	------	gi|75145826|sp|Q7Y0F6.1|SPX5_ORYSJ;	RecName: Full=SPX domain-containing protein 5; AltName: Full=Protein SPX DOMAIN GENE 5; Short=OsSPX5 >gi|306756004|sp|A2XHU0.1|SPX5_ORYSI RecName: Full=SPX domain-containing protein 5; AltName: Full=Protein SPX DOMAIN GENE 5; Short=OsSPX5;	PF03105.16	SPX	SPX domain
TRINITY_DN61486_c1_g4	3018	0.06	0.71	1.23	Protein of unknown function DUF2921 [Macleaya cordata]	GO:0016021;GO:0016021;GO:0016021;GO:0016021	CC:integral component of membrane;CC:integral component of membrane;CC:integral component of membrane;CC:integral component of membrane;	------	------	------	------	------	------	------	------	PF11145.5	DUF2921	Protein of unknown function
TRINITY_DN61496_c0_g1	2313	83.47	39.725	31.36	rust resistance kinase Lr10-like isoform X1 [Asparagus officinalis]	GO:0016021;GO:0016021;GO:0005524;GO:0004672;GO:0005524;GO:0004672	CC:integral component of membrane;CC:integral component of membrane;MF:ATP binding;MF:protein kinase activity;MF:ATP binding;MF:protein kinase activity;	K04733	IRAK4	------	------	------	------	gi|75319119|sp|P93604.1|LRK10_WHEAT;	RecName: Full=Rust resistance kinase Lr10; AltName: Full=Probable receptor-like serine/threonine-protein kinase LRK10; Flags: Precursor;	PF00069.22;PF07714.14	Pkinase;Pkinase_Tyr	Protein kinase domain;Protein tyrosine kinase
TRINITY_DN61586_c2_g2	762	0.47	1.635	42.375		------	------	------	------	------	------	------	------	------	------	------	------	------
TRINITY_DN61591_c4_g3	2022	2.235	0.195	0.32	LEAF RUST 10 DISEASE-RESISTANCE LOCUS RECEPTOR-LIKE PROTEIN KINASE-like 1.2 [Phalaenopsis equestris]	------	------	------	------	------	------	------	------	------	------	------	------	------
TRINITY_DN61617_c3_g1	1299	0.835	8.77	15.73	crocetin glucosyltransferase [Crocus ancyrensis]	GO:0008152;GO:0008152;GO:0008152;GO:0016758;GO:0016758;GO:0016758	BP:metabolic process;BP:metabolic process;BP:metabolic process;MF:transferase activity, transferring hexosyl groups;MF:transferase activity, transferring hexosyl groups;MF:transferase activity, transferring hexosyl groups;	K13691	SGT1	------	------	------	------	gi|75293337|sp|Q6X1C0.1|GLT2_CROSA;	RecName: Full=Crocetin glucosyltransferase 2;	------	------	------
TRINITY_DN61657_c1_g1	2158	0.775	3.18	6.065	PREDICTED: protein NRT1/ PTR FAMILY 2.7-like isoform X3 [Elaeis guineensis]	GO:0016021;GO:0022857	CC:integral component of membrane;MF:transmembrane transporter activity;	------	------	------	------	------	------	gi|75181815|sp|Q9M1E2.1|PTR37_ARATH;	RecName: Full=Protein NRT1/ PTR FAMILY 2.7; Short=AtNPF2.7; AltName: Full=Nitrate excretion transporter 1;	PF00854.18;PF07690.13	PTR2;MFS_1	POT family;Major Facilitator Superfamily
TRINITY_DN61672_c4_g1	2125	0.295	6.705	3.56	PREDICTED: double-stranded RNA-binding protein 3-like isoform X1 [Malus domestica]	GO:0003723;GO:0003723	MF:RNA binding;MF:RNA binding;	------	------	------	------	------	------	gi|75244423|sp|Q8GY79.1|DRB5_ARATH;	RecName: Full=Double-stranded RNA-binding protein 5; AltName: Full=dsRNA-binding protein 5; Short=AtDRB5;	PF05922.13;PF00035.23	Inhibitor_I9;dsrm	Peptidase inhibitor I9;Double-stranded RNA binding motif
TRINITY_DN61686_c10_g1	1000	5.24	1.3	0.315		------	------	------	------	------	------	------	------	------	------	------	------	------
TRINITY_DN61732_c2_g1	1155	3.775	0.36	0.14		------	------	------	------	------	------	------	------	------	------	------	------	------
TRINITY_DN61769_c1_g2	651	46.375	1.76	2.28	PREDICTED: LOW QUALITY PROTEIN: protein LHY-like [Elaeis guineensis]	GO:0006355;GO:0006351;GO:0005634;GO:0003677	BP:regulation of transcription, DNA-templated;BP:transcription, DNA-templated;CC:nucleus;MF:DNA binding;	K12133	LHY	map04712	Circadian rhythm - plant	------	------	gi|269969425|sp|Q6R0H1.2|LHY_ARATH;	RecName: Full=Protein LHY; AltName: Full=MYB-related transcription factor LHY; AltName: Full=Protein LATE ELONGATED HYPOCOTYL;	PF00249.28;PF13921.3;PF15963.2	Myb_DNA-binding;Myb_DNA-bind_6;Myb_DNA-bind_7	Myb-like DNA-binding domain;Myb-like DNA-binding domain;Myb DNA-binding like
TRINITY_DN61815_c2_g1	2988	37.255	112.02	206.965	DEAD-box ATP-dependent RNA helicase 3, chloroplastic-like, partial [Asparagus officinalis]	GO:0010501;GO:0005737;GO:0005730;GO:0005634;GO:0005524;GO:0004004;GO:0003723;GO:0008270;GO:0005524;GO:0004386;GO:0003723;GO:0008270	BP:RNA secondary structure unwinding;CC:cytoplasm;CC:nucleolus;CC:nucleus;MF:ATP binding;MF:ATP-dependent RNA helicase activity;MF:RNA binding;MF:zinc ion binding;MF:ATP binding;MF:helicase activity;MF:RNA binding;MF:zinc ion binding;	------	------	------	------	COG0513	L:Replication, recombination and repair	gi|108861893|sp|Q8L7S8.2|RH3_ARATH;	RecName: Full=DEAD-box ATP-dependent RNA helicase 3, chloroplastic; AltName: Full=Protein EMBRYO DEFECTIVE 1138; Flags: Precursor;	PF00270.26;PF00271.28;PF08152.9;PF04851.12;PF00098.20;PF13604.3;PF14617.3	DEAD;Helicase_C;GUCT;ResIII;zf-CCHC;AAA_30;CMS1	DEAD/DEAH box helicase;Helicase conserved C-terminal domain;GUCT;Type III restriction enzyme, res subunit;Zinc knuckle;AAA domain;U3-containing 90S pre-ribosomal complex subunit
TRINITY_DN61820_c6_g1	598	1.145	11.74	26.865	zinc finger protein 8 [Populus trichocarpa]	GO:0003676;GO:0003676	MF:nucleic acid binding;MF:nucleic acid binding;	------	------	------	------	------	------	gi|75328211|sp|Q84WI0.1|GIS_ARATH;	RecName: Full=Zinc finger protein GIS; AltName: Full=Protein GLABROUS INFLORESCENCE STEMS;	PF13912.3;PF13894.3	zf-C2H2_6;zf-C2H2_4	C2H2-type zinc finger;C2H2-type zinc finger
TRINITY_DN61874_c2_g1	1368	80.14	22.045	11.045	PREDICTED: 3-ketoacyl-CoA synthase 11 [Vitis vinifera]	GO:0006633;GO:0006633;GO:0006633;GO:0006633;GO:0016021;GO:0016021;GO:0016021;GO:0016021;GO:0016747;GO:0016747;GO:0016747;GO:0016747	BP:fatty acid biosynthetic process;BP:fatty acid biosynthetic process;BP:fatty acid biosynthetic process;BP:fatty acid biosynthetic process;CC:integral component of membrane;CC:integral component of membrane;CC:integral component of membrane;CC:integral component of membrane;MF:transferase activity, transferring acyl groups other than amino-acyl groups;MF:transferase activity, transferring acyl g…	K15397	KCS	map00062	Fatty acid elongation	------	------	gi|75219503|sp|O48780.1|KCS11_ARATH;	RecName: Full=3-ketoacyl-CoA synthase 11; Short=KCS-11; AltName: Full=Very long-chain fatty acid condensing enzyme 11; Short=VLCFA condensing enzyme 11;	PF08392.9;PF08545.7	FAE1_CUT1_RppA;ACP_syn_III	FAE1/Type III polyketide synthase-like protein;3-Oxoacyl-[acyl-carrier-protein
TRINITY_DN61941_c5_g1	1638	6.795	0.015	0.13		------	------	------	------	------	------	------	------	------	------	------	------	------
TRINITY_DN61996_c0_g2	1142	64.23	13.81	2.125	rust resistance kinase Lr10-like [Ananas comosus]	------	------	------	------	------	------	------	------	gi|75319119|sp|P93604.1|LRK10_WHEAT;	RecName: Full=Rust resistance kinase Lr10; AltName: Full=Probable receptor-like serine/threonine-protein kinase LRK10; Flags: Precursor;	PF00069.22;PF07714.14	Pkinase;Pkinase_Tyr	Protein kinase domain;Protein tyrosine kinase
TRINITY_DN61996_c0_g5	360	22.51	0.49	0	rust resistance kinase Lr10-like [Hevea brasiliensis]	------	------	------	------	------	------	------	------	------	------	------	------	------
TRINITY_DN62032_c2_g1	1773	8.915	3.18	29.015	zinc finger MYM-type protein 1-like [Populus trichocarpa]	------	------	------	------	------	------	------	------	gi|74743897|sp|Q5SVZ6.1|ZMYM1_HUMAN;	RecName: Full=Zinc finger MYM-type protein 1;	PF14291.3	DUF4371	Domain of unknown function
TRINITY_DN62046_c1_g2	652	20.415	3.265	0.69	mannan endo-1,4-beta-mannosidase 2-like [Asparagus officinalis]	GO:0005975;GO:0005975;GO:0016021;GO:0004553;GO:0004553	BP:carbohydrate metabolic process;BP:carbohydrate metabolic process;CC:integral component of membrane;MF:hydrolase activity, hydrolyzing O-glycosyl compounds;MF:hydrolase activity, hydrolyzing O-glycosyl compounds;	K19355	MAN	map00051	Fructose and mannose metabolism	------	------	gi|75233455|sp|Q7Y223.1|MAN2_ARATH;	RecName: Full=Mannan endo-1,4-beta-mannosidase 2; AltName: Full=Beta-mannanase 2; AltName: Full=Endo-beta-1,4-mannanase 2; Short=AtMAN2; Flags: Precursor;	------	------	------
TRINITY_DN62076_c4_g1	2754	28.545	4.185	3.1	LOW QUALITY PROTEIN: putative serine/threonine-protein kinase [Asparagus officinalis]	GO:0005524;GO:0004674;GO:0005524;GO:0004674	MF:ATP binding;MF:protein serine/threonine kinase activity;MF:ATP binding;MF:protein serine/threonine kinase activity;	K04733	IRAK4	------	------	COG0515	T:Signal transduction mechanisms	gi|313471762|sp|C0LGN2.1|Y3148_ARATH;	RecName: Full=Probable leucine-rich repeat receptor-like serine/threonine-protein kinase At3g14840; Flags: Precursor;	PF07714.14;PF00069.22;PF01636.20	Pkinase_Tyr;Pkinase;APH	Protein tyrosine kinase;Protein kinase domain;Phosphotransferase enzyme family
TRINITY_DN62079_c5_g1	2322	12.015	15.365	12.41	PREDICTED: terpene synthase 10 [Musa acuminata subsp. malaccensis]	GO:0008152;GO:0008152;GO:0000287;GO:0010333;GO:0000287;GO:0010333	BP:metabolic process;BP:metabolic process;MF:magnesium ion binding;MF:terpene synthase activity;MF:magnesium ion binding;MF:terpene synthase activity;	------	------	------	------	------	------	gi|487523485|sp|B9T536.1|TPS10_RICCO;	RecName: Full=Terpene synthase 10; Short=RcSeTPS10;	PF01397.18;PF03936.13	Terpene_synth;Terpene_synth_C	Terpene synthase, N-terminal domain;Terpene synthase family, metal binding domain
TRINITY_DN62082_c2_g2	1270	70.315	29.235	14.27	glutamate synthase 1 [NADH], chloroplastic isoform X2 [Asparagus officinalis]	GO:0006537;GO:0050660;GO:0010181;GO:0016040;GO:0005506;GO:0051536	BP:glutamate biosynthetic process;MF:flavin adenine dinucleotide binding;MF:FMN binding;MF:glutamate synthas;MF:iron ion binding;MF:iron-sulfur cluster binding;	K00264	GLT1	map00250;map00910	Alanine, aspartate and glutamate metabolism;Nitrogen metabolism	------	------	gi|300680981|sp|Q9LV03.2|GLUT1_ARATH;	RecName: Full=Glutamate synthase 1 [NADH], chloroplastic; AltName: Full=NADH-dependent glutamate synthase 1; Short=NADH-GOGAT 1; Flags: Precursor;	PF04898.11;PF00310.18	Glu_syn_central;GATase_2	Glutamate synthase central domain;Glutamine amidotransferases class-II
TRINITY_DN62084_c4_g4	929	367.195	75.61	70.815	remorin 4.1-like [Asparagus officinalis]	------	------	------	------	------	------	------	------	gi|34925093|sp|P93788.1|REMO_SOLTU;	RecName: Full=Remorin; AltName: Full=pp34;	PF03763.10	Remorin_C	Remorin, C-terminal region
TRINITY_DN62097_c2_g2	718	0	0.42	2.295	PREDICTED: probable beta-1,4-xylosyltransferase IRX10 [Nicotiana attenuata]	GO:0010417;GO:0009834;GO:0006486;GO:0006486;GO:0006486;GO:0080116;GO:0042285;GO:0016757;GO:0016757	BP:glucuronoxylan biosynthetic process;BP:plant-type secondary cell wall biogenesis;BP:protein glycosylation;BP:protein glycosylation;BP:protein glycosylation;MF:glucuronoxylan glucuronosyltransferase activity;MF:xylosyltransferase activity;MF:transferase activity, transferring glycosyl groups;MF:transferase activity, transferring glycosyl groups;	K20870	IRX10	------	------	------	------	gi|75159221|sp|Q8S1X7.1|GT15_ORYSJ;	RecName: Full=Probable glucuronosyltransferase Os01g0926700;	PF03016.12	Exostosin	Exostosin family
TRINITY_DN62104_c1_g4	669	0	1.105	16.2		------	------	------	------	------	------	------	------	------	------	------	------	------
TRINITY_DN62143_c1_g1	4166	15.065	6.55	0.655	uncharacterized protein A4U43_C07F19640 [Asparagus officinalis]	GO:0016021;GO:0005524;GO:0004672	CC:integral component of membrane;MF:ATP binding;MF:protein kinase activity;	------	------	------	------	------	------	gi|75175345|sp|Q9LP24.1|Y1571_ARATH;	RecName: Full=Probable leucine-rich repeat receptor-like protein kinase At1g35710; Flags: Precursor;	PF13855.3;PF12799.4;PF00069.22;PF07714.14;PF08263.9	LRR_8;LRR_4;Pkinase;Pkinase_Tyr;LRRNT_2	Leucine rich repeat;Leucine Rich repeats;Protein kinase domain;Protein tyrosine kinase;Leucine rich repeat N-terminal domain
TRINITY_DN62149_c4_g1	1505	84.315	12.29	7.875	PREDICTED: uncharacterized protein LOC105042756 [Elaeis guineensis]	GO:0045454;GO:0035556;GO:0045454;GO:0035556;GO:0005622;GO:0005622;GO:0009055;GO:0015035;GO:0009055;GO:0015035	BP:cell redox homeostasis;BP:intracellular signal transduction;BP:cell redox homeostasis;BP:intracellular signal transduction;CC:intracellular;CC:intracellular;MF:electron carrier activity;MF:protein disulfide oxidoreductase activity;MF:electron carrier activity;MF:protein disulfide oxidoreductase activity;	------	------	------	------	------	------	------	------	PF04784.11;PF00610.18;PF00042.19	DUF547;DEP;Globin	Protein of unknown function, DUF547;Domain found in Dishevelled, Egl-10, and Pleckstrin;Globin
TRINITY_DN62162_c1_g1	1535	39.615	4.83	5.465	PREDICTED: leucine-rich repeat receptor-like tyrosine-protein kinase PXC3 [Elaeis guineensis]	GO:0016021;GO:0005524;GO:0004672	CC:integral component of membrane;MF:ATP binding;MF:protein kinase activity;	------	------	------	------	------	------	gi|75097645|sp|O22938.1|PXC3_ARATH;	RecName: Full=Leucine-rich repeat receptor-like tyrosine-protein kinase PXC3; AltName: Full=Protein PXY/TDR-CORRELATED 3; Flags: Precursor;	PF13855.3;PF12799.4	LRR_8;LRR_4	Leucine rich repeat;Leucine Rich repeats
TRINITY_DN62303_c1_g3	929	0.515	11.77	7.165	LOW QUALITY PROTEIN: inorganic phosphate transporter 1-4-like [Asparagus officinalis]	------	------	K08176	PHO84	------	------	------	------	gi|75299856|sp|Q8H6H0.1|PHT16_ORYSJ;	RecName: Full=Inorganic phosphate transporter 1-6; Short=OsPT6; Short=OsPht1;6; AltName: Full=;	PF00083.21	Sugar_tr	Sugar
TRINITY_DN62314_c0_g3	1470	2.39	2.12	30.245	vegetative cell wall protein gp1-like isoform X1 [Asparagus officinalis]	------	------	K10592	HUWE1, MULE, ARF-BP1	map04120	Ubiquitin mediated proteolysis	------	------	------	------	------	------	------
TRINITY_DN62347_c2_g1	569	97.995	10.185	8.145		------	------	------	------	------	------	------	------	------	------	------	------	------
TRINITY_DN62368_c2_g1	2753	36.675	10.09	7.815	uncharacterized protein LOC109845724, partial [Asparagus officinalis]	GO:0016042;GO:0016042;GO:0016787;GO:0016787	BP:lipid catabolic process;BP:lipid catabolic process;MF:hydrolase activity;MF:hydrolase activity;	------	------	------	------	------	------	------	------	------	------	------
TRINITY_DN62370_c6_g1	1835	0.24	1.025	2.055		------	------	------	------	------	------	------	------	------	------	------	------	------
TRINITY_DN62396_c0_g8	1529	6.68	3.325	0.755	receptor protein kinase TMK1 [Phalaenopsis equestris]	GO:0016021;GO:0016021;GO:0005524;GO:0004674;GO:0005524;GO:0004674	CC:integral component of membrane;CC:integral component of membrane;MF:ATP binding;MF:protein serine/threonine kinase activity;MF:ATP binding;MF:protein serine/threonine kinase activity;	K00924	E2.7.1.-	------	------	------	------	gi|1174718|sp|P43298.1|TMK1_ARATH;	RecName: Full=Receptor protein kinase TMK1; AltName: Full=BARK1-like kinase 1; AltName: Full=Transmembrane kinase 1; Flags: Precursor;	PF12799.4;PF13855.3;PF08263.9	LRR_4;LRR_8;LRRNT_2	Leucine Rich repeats;Leucine rich repeat;Leucine rich repeat N-terminal domain
TRINITY_DN62396_c0_g9	1683	14.195	1.405	0.905	PREDICTED: receptor protein kinase TMK1-like [Elaeis guineensis]	GO:0016021;GO:0005524;GO:0004674	CC:integral component of membrane;MF:ATP binding;MF:protein serine/threonine kinase activity;	------	------	------	------	------	------	gi|1174718|sp|P43298.1|TMK1_ARATH;	RecName: Full=Receptor protein kinase TMK1; AltName: Full=BARK1-like kinase 1; AltName: Full=Transmembrane kinase 1; Flags: Precursor;	PF13855.3;PF12799.4;PF08263.9	LRR_8;LRR_4;LRRNT_2	Leucine rich repeat;Leucine Rich repeats;Leucine rich repeat N-terminal domain
TRINITY_DN62410_c3_g4	1214	0	0	1.88	uncharacterized protein LOC109828430 isoform X2 [Asparagus officinalis]	------	------	K05349	bglX	map00460;map00940;map00500	Cyanoamino acid metabolism;Phenylpropanoid biosynthesis;Starch and sucrose metabolism	------	------	gi|60390960|sp|Q9FIY7.1|SM3L3_ARATH;	RecName: Full=Putative SWI/SNF-related matrix-associated actin-dependent regulator of chromatin subfamily A member 3-like 3; Short=SMARCA3-like protein 3;	------	------	------
TRINITY_DN62429_c0_g2	2764	5.79	0.62	0.675		------	------	------	------	------	------	------	------	------	------	------	------	------
TRINITY_DN62469_c11_g1	953	0	3.86	2.525		------	------	------	------	------	------	------	------	------	------	------	------	------
TRINITY_DN62514_c1_g2	3034	11.62	3.065	1.425	PREDICTED: LOW QUALITY PROTEIN: probable receptor-like protein kinase At5g24010 [Elaeis guineensis]	GO:0016021;GO:0016021;GO:0005524;GO:0004672;GO:0005524;GO:0004672	CC:integral component of membrane;CC:integral component of membrane;MF:ATP binding;MF:protein kinase activity;MF:ATP binding;MF:protein kinase activity;	------	------	------	------	------	------	gi|75334039|sp|Q9FLW0.1|Y5241_ARATH;	RecName: Full=Probable receptor-like protein kinase At5g24010; Flags: Precursor;	PF00069.22;PF07714.14;PF12819.4;PF11721.5	Pkinase;Pkinase_Tyr;Malectin_like;Malectin	Protein kinase domain;Protein tyrosine kinase;Carbohydrate-binding protein of the ER;Di-glucose binding within endoplasmic reticulum
TRINITY_DN62528_c1_g2	1665	40.8	85.425	770.46	carotenoid cleavage dioxygenase [Crocus ancyrensis]	GO:0003834;GO:0046872;GO:0003834;GO:0046872;GO:0046872;GO:0016702;GO:0045549;GO:0046872	MF:beta-carotene 15,15'-monooxygenase activity;MF:metal ion binding;MF:beta-carotene 15,15'-monooxygenase activity;MF:metal ion binding;MF:metal ion binding;MF:oxidoreductase activity, acting on single donors with incorporation of molecular oxygen, incorporation of two atoms of oxygen;MF:9-cis-epoxycarotenoid dioxygenase activity;MF:metal ion binding;	K09840	NCED	map00906	Carotenoid biosynthesis	COG3670	Q:Secondary metabolites biosynthesis, transport and catabolism	gi|75318399|sp|O49675.1|CCD4_ARATH;	RecName: Full=Probable carotenoid cleavage dioxygenase 4, chloroplastic; Short=AtCCD4; AltName: Full=AtNCED4; Flags: Precursor;	PF03055.12	RPE65	Retinal pigment epithelial membrane protein
TRINITY_DN62544_c6_g1	487	8.035	18.39	53.015		------	------	------	------	------	------	------	------	------	------	------	------	------
TRINITY_DN62561_c6_g1	1311	2.14	0.57	0.085	chitin elicitor receptor kinase 1-like [Asparagus officinalis]	GO:0015074;GO:0003676	BP:DNA integration;MF:nucleic acid binding;	------	------	------	------	------	------	------	------	------	------	------
TRINITY_DN62580_c5_g1	944	1.02	3.65	7.795	two-component response regulator-like PRR95 [Asparagus officinalis]	GO:0000160;GO:0000160;GO:0000160;GO:0005634;GO:0005634;GO:0005634	BP:phosphorelay signal transduction system;BP:phosphorelay signal transduction system;BP:phosphorelay signal transduction system;CC:nucleus;CC:nucleus;CC:nucleus;	K12130	PRR5	map04712	Circadian rhythm - plant	------	------	gi|68565887|sp|Q689G6.1|PRR95_ORYSJ;	RecName: Full=Two-component response regulator-like PRR95; AltName: Full=Pseudo-response regulator 95; Short=OsPRR95;	PF00072.21	Response_reg	Response regulator receiver domain
TRINITY_DN62580_c5_g2	2313	2.655	14.51	44.68	PREDICTED: two-component response regulator-like APRR9 isoform X3 [Elaeis guineensis]	GO:0000160;GO:0005634	BP:phosphorelay signal transduction system;CC:nucleus;	K12130	PRR5	map04712	Circadian rhythm - plant	------	------	gi|68565887|sp|Q689G6.1|PRR95_ORYSJ;	RecName: Full=Two-component response regulator-like PRR95; AltName: Full=Pseudo-response regulator 95; Short=OsPRR95;	PF06203.11	CCT	CCT motif
TRINITY_DN62580_c5_g3	527	2.22	5.605	20.56	two-component response regulator-like PRR95 [Asparagus officinalis]	GO:0000160;GO:0000160;GO:0005634;GO:0005634	BP:phosphorelay signal transduction system;BP:phosphorelay signal transduction system;CC:nucleus;CC:nucleus;	K12130	PRR5	map04712	Circadian rhythm - plant	------	------	gi|68565887|sp|Q689G6.1|PRR95_ORYSJ;	RecName: Full=Two-component response regulator-like PRR95; AltName: Full=Pseudo-response regulator 95; Short=OsPRR95;	PF06203.11	CCT	CCT motif
TRINITY_DN62580_c5_g5	815	1.13	8.43	22.785	PREDICTED: two-component response regulator-like PRR95 isoform X1 [Phoenix dactylifera]	GO:0000160;GO:0000160;GO:0005634;GO:0005634	BP:phosphorelay signal transduction system;BP:phosphorelay signal transduction system;CC:nucleus;CC:nucleus;	K12130	PRR5	map04712	Circadian rhythm - plant	------	------	gi|52783225|sp|Q6LA42.2|APRR5_ARATH;	RecName: Full=Two-component response regulator-like APRR5; AltName: Full=Pseudo-response regulator 5;	PF00072.21	Response_reg	Response regulator receiver domain
TRINITY_DN62597_c0_g1	893	4.835	13.7	276.095	putative germin-like protein 2-1 [Asparagus officinalis]	------	------	------	------	------	------	------	------	gi|75225169|sp|Q6YZA1.1|GL88_ORYSJ;	RecName: Full=Germin-like protein 8-8; Flags: Precursor;	PF00190.19;PF07883.8	Cupin_1;Cupin_2	Cupin;Cupin domain
TRINITY_DN62608_c4_g4	623	0	0.66	3.84		------	------	------	------	------	------	------	------	------	------	------	------	------
TRINITY_DN62651_c0_g5	2254	4.23	1.18	0.515	hypothetical protein CFOL_v3_07662, partial [Cephalotus follicularis]	------	------	------	------	------	------	------	------	------	------	------	------	------
TRINITY_DN62689_c3_g1	1622	33.73	19.465	3.585	PREDICTED: bax inhibitor 1 [Phoenix dactylifera]	GO:0016021;GO:0016021	CC:integral component of membrane;CC:integral component of membrane;	------	------	------	------	------	------	gi|12229684|sp|Q9LD45.1|BI1_ARATH;	RecName: Full=Bax inhibitor 1; Short=AtBI-1; Short=BI-1;	PF01027.17	Bax1-I	Inhibitor of apoptosis-promoting Bax1
TRINITY_DN62696_c2_g5	2202	6.3	0.09	0.1	PREDICTED: cell division cycle protein 48 homolog [Elaeis guineensis]	GO:0051301;GO:0005524;GO:0016787;GO:0005524;GO:0016787	BP:cell division;MF:ATP binding;MF:hydrolase activity;MF:ATP binding;MF:hydrolase activity;	------	------	------	------	------	------	gi|1705678|sp|P54774.1|CDC48_SOYBN;	RecName: Full=Cell division cycle protein 48 homolog; AltName: Full=Valosin-containing protein homolog; Short=VCP;	------	------	------
TRINITY_DN62715_c1_g1	1486	6.14	0.595	0.07	PREDICTED: UDP-glycosyltransferase 91C1-like isoform X3 [Musa acuminata subsp. malaccensis]	------	------	------	------	------	------	------	------	gi|75249511|sp|Q940V3.1|U91A1_ARATH;	RecName: Full=UDP-glycosyltransferase 91A1;	PF00201.15	UDPGT	UDP-glucoronosyl and UDP-glucosyl transferase
TRINITY_DN62747_c7_g2	5172	247.71	91.99	54.5		------	------	------	------	------	------	------	------	------	------	------	------	------
TRINITY_DN62759_c1_g1	2288	0.295	6.015	10.755	laccase-6-like isoform X1 [Asparagus officinalis]	GO:0046274;GO:0048046;GO:0005507;GO:0052716	BP:lignin catabolic process;CC:apoplast;MF:copper ion binding;MF:hydroquinon;	K05909	E1.10.3.2	------	------	COG2132	Q:Secondary metabolites biosynthesis, transport and catabolism	gi|75338836|sp|Q9ZPY2.1|LAC6_ARATH;	RecName: Full=Laccase-6; AltName: Full=Benzenediol:oxygen oxidoreductase 6; AltName: Full=Diphenol oxidase 6; AltName: Full=Urishiol oxidase 6; Flags: Precursor;	PF07731.11;PF07732.12;PF00394.19	Cu-oxidase_2;Cu-oxidase_3;Cu-oxidase	Multicopper oxidase;Multicopper oxidase;Multicopper oxidase
TRINITY_DN62777_c0_g1	1616	0.445	2.09	10.05	Laccase 17 [Theobroma cacao]	GO:0046274;GO:0046274;GO:0046274;GO:0048046;GO:0048046;GO:0048046;GO:0005507;GO:0052716;GO:0005507;GO:0052716;GO:0005507;GO:0052716	BP:lignin catabolic process;BP:lignin catabolic process;BP:lignin catabolic process;CC:apoplast;CC:apoplast;CC:apoplast;MF:copper ion binding;MF:hydroquinon;MF:copper ion binding;MF:hydroquinon;MF:copper ion binding;MF:hydroquinon;	K05909	E1.10.3.2	------	------	------	------	gi|75333948|sp|Q9FJD5.1|LAC17_ARATH;	RecName: Full=Laccase-17; AltName: Full=Benzenediol:oxygen oxidoreductase 17; AltName: Full=Diphenol oxidase 17; AltName: Full=Urishiol oxidase 17; Flags: Precursor;	PF07731.11;PF00394.19;PF07732.12	Cu-oxidase_2;Cu-oxidase;Cu-oxidase_3	Multicopper oxidase;Multicopper oxidase;Multicopper oxidase
TRINITY_DN62800_c2_g1	607	195.25	21.575	27.005	PREDICTED: ethylene-responsive transcription factor 2-like [Musa acuminata subsp. malaccensis]	GO:0006351;GO:0005634;GO:0003677;GO:0003700	BP:transcription, DNA-templated;CC:nucleus;MF:DNA binding;MF:transcription factor activity, sequence-specific DNA binding;	K09286	EREBP	------	------	------	------	gi|57012756|sp|Q40476.1|ERF1_TOBAC;	RecName: Full=Ethylene-responsive transcription factor 1; Short=NtERF1; AltName: Full=Ethylene-responsive element-binding factor 1; Short=EREBP-1;	PF00847.17	AP2	AP2 domain
TRINITY_DN62806_c2_g1	1123	0.255	2.305	4.28	fructose-1,6-bisphosphatase, cytosolic [Asparagus officinalis]	GO:0005975;GO:0005975;GO:0005737;GO:0042132;GO:0046872;GO:0042132	BP:carbohydrate metabolic process;BP:carbohydrate metabolic process;CC:cytoplasm;MF:fructose 1,6-bisphosphate 1-phosphatase activity;MF:metal ion binding;MF:fructose 1,6-bisphosphate 1-phosphatase activity;	K03841	FBP, fbp	map00010;map00030;map00051;map00710	Glycolysis / Gluconeogenesis;Pentose phosphate pathway;Fructose and mannose metabolism;Carbon fixation in photosynthetic organisms	------	------	gi|75313310|sp|Q9SDL8.1|F16P2_ORYCO;	RecName: Full=Fructose-1,6-bisphosphatase, cytosolic; Short=FBPase; AltName: Full=D-fructose-1,6-bisphosphate 1-phosphohydrolase;	PF00316.17	FBPase	Fructose-1-6-bisphosphatase, N-terminal domain
TRINITY_DN62827_c4_g1	3797	1.055	6.55	6.985	PREDICTED: VAN3-binding protein [Elaeis guineensis]	GO:0016021	CC:integral component of membrane;	------	------	------	------	------	------	------	------	------	------	------
TRINITY_DN62834_c0_g1	1566	0.62	3.925	22.6	PREDICTED: uncharacterized protein LOC104223969 [Nicotiana sylvestris]	GO:0006355;GO:0006351;GO:0006355;GO:0006351;GO:0006355;GO:0006351;GO:0006355;GO:0006351;GO:0005634;GO:0005634;GO:0005634;GO:0005634;GO:0003677;GO:0003677;GO:0003677;GO:0003677	BP:regulation of transcription, DNA-templated;BP:transcription, DNA-templated;BP:regulation of transcription, DNA-templated;BP:transcription, DNA-templated;BP:regulation of transcription, DNA-templated;BP:transcription, DNA-templated;BP:regulation of transcription, DNA-templated;BP:transcription, DNA-templated;CC:nucleus;CC:nucleus;CC:nucleus;CC:nucleus;MF:DNA binding;MF:DNA binding;MF:DNA bindin…	------	------	------	------	------	------	gi|75170230|sp|Q9FFH1.1|RLT2_ARATH;	RecName: Full=Homeobox-DDT domain protein RLT2; AltName: Full=Protein RINGLET 2;	------	------	------
TRINITY_DN62855_c4_g1	1296	14.44	2.29	1.42		------	------	------	------	------	------	------	------	------	------	------	------	------
TRINITY_DN62883_c5_g3	3695	0.33	2.06	2.695	LOW QUALITY PROTEIN: kinesin-like protein KIN-5B [Asparagus officinalis]	GO:0007018;GO:0007018;GO:0005524;GO:0008017;GO:0003777;GO:0005524;GO:0008017;GO:0003777	BP:microtubule-based movement;BP:microtubule-based movement;MF:ATP binding;MF:microtubule binding;MF:microtubule motor activity;MF:ATP binding;MF:microtubule binding;MF:microtubule motor activity;	K10398	KIF11, EG5	------	------	------	------	gi|122242507|sp|Q0WQJ7.1|KN5B_ARATH;	RecName: Full=Kinesin-like protein KIN-5B; AltName: Full=AtKRP125a;	PF00225.20;PF16796.2	Kinesin;Microtub_bd	Kinesin motor domain;Microtubule binding
TRINITY_DN62895_c1_g1	1308	282.115	48.38	55.025	glutathione S-transferase [Dracaena cambodiana]	GO:0016740	MF:transferase activity;	K00799	GST, gst	map00480	Glutathione metabolism	------	------	gi|75334191|sp|Q9FQA3.1|GST23_MAIZE;	RecName: Full=Glutathione transferase GST 23; AltName: Full=Glutathione transferase GST 36;	PF00043.22;PF13410.3;PF13417.3;PF02798.17;PF13409.3;PF17172.1	GST_C;GST_C_2;GST_N_3;GST_N;GST_N_2;GST_N_4	Glutathione S-transferase, C-terminal domain;Glutathione S-transferase, C-terminal domain;Glutathione S-transferase, N-terminal domain;Glutathione S-transferase, N-terminal domain;Glutathione S-transferase, N-terminal domain;Glutathione S-transferase N-terminal domain
TRINITY_DN62950_c1_g1	2247	201.37	60.49	46.075	Amino acid permease 2 [Apostasia shenzhenica]	GO:0016021;GO:0016021;GO:0016021	CC:integral component of membrane;CC:integral component of membrane;CC:integral component of membrane;	------	------	------	------	COG0814	E:Amino acid transport and metabolism	gi|75220731|sp|Q39134.2|AAP3_ARATH;	RecName: Full=Amino acid permease 3; AltName: Full=Amino acid transporter AAP3;	PF01490.15	Aa_trans	Transmembrane amino acid transporter protein
TRINITY_DN62996_c0_g1	3511	3.905	0.635	0.37		------	------	------	------	------	------	------	------	------	------	------	------	------
TRINITY_DN63020_c1_g2	2257	26.51	4.31	4.155	PREDICTED: lysine-specific demethylase JMJ706-like [Elaeis guineensis]	GO:0005634;GO:0008168	CC:nucleus;MF:methyltransferase activity;	------	------	------	------	------	------	gi|122212059|sp|Q336N8.1|JM706_ORYSJ;	RecName: Full=Lysine-specific demethylase JMJ706; AltName: Full=Jumonji domain-containing protein 706; AltName: Full=Lysine-specific histone demethylase JMJ706; AltName: Full=Protein JUMONJI 706;	PF02373.19;PF02375.14;PF02928.13	JmjC;JmjN;zf-C5HC2	JmjC domain, hydroxylase;jmjN domain;C5HC2 zinc finger
TRINITY_DN63028_c2_g1	967	17.535	4.56	3.585	uncharacterized protein LOC109832882 isoform X1 [Asparagus officinalis]	------	------	------	------	------	------	------	------	------	------	------	------	------
TRINITY_DN63035_c0_g1	3550	132.72	27.665	28.515	PREDICTED: MACPF domain-containing protein CAD1 [Elaeis guineensis]	------	------	------	------	------	------	------	------	gi|75169350|sp|Q9C7N2.1|CAD1_ARATH;	RecName: Full=MACPF domain-containing protein CAD1; AltName: Full=Protein CONSTITUTIVELY ACTIVATED CELL DEATH 1; Short=Protein CAD1;	PF01843.16	DIL	DIL domain
TRINITY_DN63035_c0_g2	1255	111.085	22.725	18.35	PREDICTED: MACPF domain-containing protein CAD1-like [Musa acuminata subsp. malaccensis]	------	------	------	------	------	------	------	------	gi|75169350|sp|Q9C7N2.1|CAD1_ARATH;	RecName: Full=MACPF domain-containing protein CAD1; AltName: Full=Protein CONSTITUTIVELY ACTIVATED CELL DEATH 1; Short=Protein CAD1;	------	------	------
TRINITY_DN63085_c0_g1	840	0.04	0.18	6.27	UPF0481 protein [Apostasia shenzhenica]	GO:0016021;GO:0016021;GO:0016021;GO:0016021	CC:integral component of membrane;CC:integral component of membrane;CC:integral component of membrane;CC:integral component of membrane;	------	------	------	------	------	------	gi|75203068|sp|Q9SD53.1|Y3720_ARATH;	RecName: Full=UPF0481 protein At3g47200;	PF03140.12	DUF247	Plant protein of unknown function
TRINITY_DN63085_c0_g3	1953	3.325	0.75	0.26	putative UPF0481 protein [Ananas comosus]	GO:0016021;GO:0016021;GO:0016021;GO:0016021;GO:0016021	CC:integral component of membrane;CC:integral component of membrane;CC:integral component of membrane;CC:integral component of membrane;CC:integral component of membrane;	------	------	------	------	------	------	gi|75203068|sp|Q9SD53.1|Y3720_ARATH;	RecName: Full=UPF0481 protein At3g47200;	PF03140.12	DUF247	Plant protein of unknown function
TRINITY_DN63110_c1_g1	1023	15.94	3.38	2.955	transcription factor BIM2-like isoform X1 [Asparagus officinalis]	------	------	------	------	------	------	------	------	gi|209572593|sp|Q9LEZ3.2|BIM1_ARATH;	RecName: Full=Transcription factor BIM1; AltName: Full=BES1-interacting Myc-like protein 1; AltName: Full=Basic helix-loop-helix protein 46; Short=AtbHLH46; Short=bHLH 46; AltName: Full=Transcription factor EN 126; AltName: Full=bHLH transcription factor bHLH046;	------	------	------
TRINITY_DN63140_c2_g1	2547	51.165	7.76	9.455	PREDICTED: glutamine--fructose-6-phosphate aminotransferase [isomerizing] 2 [Musa acuminata subsp. malaccensis]	GO:1901137;GO:1901137;GO:0097367;GO:0004360;GO:0097367;GO:0004360	BP:carbohydrate derivative biosynthetic process;BP:carbohydrate derivative biosynthetic process;MF:carbohydrate derivative binding;MF:glutamine-fructose-6-phosphate transaminas;MF:carbohydrate derivative binding;MF:glutamine-fructose-6-phosphate transaminas;	K00820	glmS, GFPT	map00520;map00250	Amino sugar and nucleotide sugar metabolism;Alanine, aspartate and glutamate metabolism	COG0449	M:Cell wall/membrane/envelope biogenesis	gi|6226820|sp|O94808.3|GFPT2_HUMAN;	RecName: Full=Glutamine--fructose-6-phosphate aminotransferase [isomerizing] 2; AltName: Full=D-fructose-6-phosphate amidotransferase 2; AltName: Full=Glutamine:fructose-6-phosphate amidotransferase 2; Short=GFAT 2; Short=GFAT2; AltName: Full=Hexosephosphate aminotransferase 2;	PF01380.19;PF13522.3;PF13537.3	SIS;GATase_6;GATase_7	SIS domain;Glutamine amidotransferase domain;Glutamine amidotransferase domain
TRINITY_DN63162_c3_g2	563	25.115	6.275	4.655	protein PIN-LIKES 7-like [Asparagus officinalis]	GO:0055085;GO:0055085;GO:0055085;GO:0016021;GO:0016021;GO:0016021	BP:transmembrane transport;BP:transmembrane transport;BP:transmembrane transport;CC:integral component of membrane;CC:integral component of membrane;CC:integral component of membrane;	K07088	K07088	------	------	------	------	gi|75171357|sp|Q9FKY4.1|PILS7_ARATH;	RecName: Full=Protein PIN-LIKES 7; AltName: Full=Auxin efflux carrier-like protein 7;	PF03547.15	Mem_trans	Membrane transport protein
TRINITY_DN63163_c1_g1	2638	1.3	0.09	0.095		------	------	------	------	------	------	------	------	------	------	------	------	------
TRINITY_DN63172_c2_g3	1534	2.33	0.045	0.21		------	------	------	------	------	------	------	------	------	------	------	------	------
TRINITY_DN63185_c8_g2	1097	1.545	4.715	18.945	PREDICTED: protein NBR1 homolog [Phoenix dactylifera]	GO:0051258;GO:0005773;GO:0008270;GO:0043130;GO:0008270	BP:protein polymerization;CC:vacuole;MF:zinc ion binding;MF:ubiquitin binding;MF:zinc ion binding;	K17987	NBR1	------	------	------	------	gi|75313180|sp|Q9SB64.1|NBR1_ARATH;	RecName: Full=Protein NBR1 homolog; Short=AtNBR1; AltName: Full=At4g24690;	PF00564.21	PB1	PB1 domain
TRINITY_DN63193_c2_g3	750	100.97	11.01	5.425	LOW QUALITY PROTEIN: cyanidin 3-O-rutinoside 5-O-glucosyltransferase-like [Asparagus officinalis]	------	------	K21371	UGT75L6, UGTCs2	------	------	------	------	gi|75311478|sp|Q9LR44.1|U75B1_ARATH;	RecName: Full=UDP-glycosyltransferase 75B1; AltName: Full;	PF00201.15	UDPGT	UDP-glucoronosyl and UDP-glucosyl transferase
TRINITY_DN63216_c3_g1	2059	2.2	3.23	11.54	PREDICTED: protein NRT1/ PTR FAMILY 6.3-like [Phoenix dactylifera]	GO:0006857;GO:0006857;GO:0006857;GO:0016021;GO:0016021;GO:0016021;GO:0022857;GO:0022857;GO:0022857	BP:oligopeptide transport;BP:oligopeptide transport;BP:oligopeptide transport;CC:integral component of membrane;CC:integral component of membrane;CC:integral component of membrane;MF:transmembrane transporter activity;MF:transmembrane transporter activity;MF:transmembrane transporter activity;	------	------	------	------	------	------	gi|544018|sp|Q05085.1|PTR7_ARATH;	RecName: Full=Protein NRT1/ PTR FAMILY 6.3; Short=AtNPF6.3; AltName: Full=Nitrate transporter 1.1; Short=AtNRT1; AltName: Full=Nitrate/chlorate transporter; AltName: Full=Protein CHLORINA 1;	PF00854.18;PF07690.13	PTR2;MFS_1	POT family;Major Facilitator Superfamily
TRINITY_DN63222_c1_g1	3195	71.41	13.085	9.855	PREDICTED: formin-like protein 11 isoform X1 [Elaeis guineensis]	------	------	------	------	------	------	------	------	gi|122167218|sp|Q0D5P3.1|FH11_ORYSJ;	RecName: Full=Formin-like protein 11; AltName: Full=OsFH11; Flags: Precursor;	PF02181.20	FH2	Formin Homology 2 Domain
TRINITY_DN63222_c1_g2	1429	20.79	2.8	1.555	PREDICTED: formin-like protein 3 isoform X1 [Elaeis guineensis]	------	------	------	------	------	------	------	------	gi|160013957|sp|Q94B77.2|FH5_ARATH;	RecName: Full=Formin-like protein 5; Short=AtFH5; Short=AtFORMIN-5; AltName: Full=Formin homology 2 domain-containing protein 5;	PF02181.20	FH2	Formin Homology 2 Domain
TRINITY_DN63224_c0_g4	409	45.915	0.16	3.395	proline dehydrogenase 2, mitochondrial-like [Asparagus officinalis]	GO:0006562;GO:0004657	BP:proline catabolic process;MF:proline dehydrogenase activity;	K00318	PRODH	map00330	Arginine and proline metabolism	------	------	gi|75126937|sp|Q6NKX1.1|PROD2_ARATH;	RecName: Full=Proline dehydrogenase 2, mitochondrial; AltName: Full=Osmotic stress-induced proline dehydrogenase; AltName: Full=Proline oxidase; Flags: Precursor;	PF01619.15	Pro_dh	Proline dehydrogenase
TRINITY_DN63228_c6_g4	1096	2.785	2.575	7.075		------	------	------	------	------	------	------	------	------	------	------	------	------
TRINITY_DN63304_c5_g1	340	357.085	201.995	0.62	23.2 kDa heat shock protein, partial [Ananas comosus]	------	------	K13993	HSP20	map04141	Protein processing in endoplasmic reticulum	------	------	gi|232282|sp|P30236.1|HSP41_SOYBN;	RecName: Full=22.0 kDa class IV heat shock protein; Flags: Precursor;	PF00011.18	HSP20	Hsp20/alpha crystallin family
TRINITY_DN63313_c4_g2	4584	0.13	0.49	1.28	1-phosphatidylinositol-3-phosphate 5-kinase FAB1B-like [Asparagus officinalis]	GO:0005524;GO:0046872;GO:0016307;GO:0005524;GO:0046872;GO:0016307;GO:0005524;GO:0046872;GO:0016307	MF:ATP binding;MF:metal ion binding;MF:phosphatidylinositol phosphate kinase activity;MF:ATP binding;MF:metal ion binding;MF:phosphatidylinositol phosphate kinase activity;MF:ATP binding;MF:metal ion binding;MF:phosphatidylinositol phosphate kinase activity;	K00921	PIKFYVE, FAB1	map04145;map04070;map00562	Phagosome;Phosphatidylinositol signaling system;Inositol phosphate metabolism	------	------	gi|75274251|sp|Q9LUM0.1|FAB1B_ARATH;	RecName: Full=1-phosphatidylinositol-3-phosphate 5-kinase FAB1B; Short=Phosphatidylinositol 3-phosphate 5-kinase; AltName: Full=FYVE finger-containing phosphoinositide kinase; AltName: Full=PIKfyve; AltName: Full=Phosphatidylinositol 3-phosphate 5-kinase type III; Short=PIPkin-III; Short=Type III PIP kinase; AltName: Full=Protein FORMS APLOID AND BINUCLEATE CELLS 1B;	PF00118.21;PF01504.15	Cpn60_TCP1;PIP5K	TCP-1/cpn60 chaperonin family;Phosphatidylinositol-4-phosphate 5-Kinase
TRINITY_DN63318_c2_g6	2100	1.825	0.395	0.03		------	------	------	------	------	------	------	------	------	------	------	------	------
TRINITY_DN63319_c3_g1	2647	0.23	1.77	2.23		------	------	------	------	------	------	------	------	------	------	------	------	------
TRINITY_DN63324_c1_g1	2220	87.24	32.575	12.69	linoleate 13S-lipoxygenase 2-1, chloroplastic-like [Ananas comosus]	GO:0031408;GO:0046872;GO:0016702	BP:oxylipin biosynthetic process;MF:metal ion binding;MF:oxidoreductase activity, acting on single donors with incorporation of molecular oxygen, incorporation of two atoms of oxygen;	K00454	LOX2S	map00591;map00592	Linoleic acid metabolism;alpha-Linolenic acid metabolism	------	------	gi|75277587|sp|O24370.1|LOX21_SOLTU;	RecName: Full=Linoleate 13S-lipoxygenase 2-1, chloroplastic; AltName: Full=Lipoxygenase 2-1; Flags: Precursor;	PF00305.16;PF01477.20	Lipoxygenase;PLAT	Lipoxygenase;PLAT/LH2 domain
TRINITY_DN63328_c2_g1	2631	117.78	33.32	27.705	PREDICTED: glycosyltransferase family protein 64 protein C5 [Elaeis guineensis]	GO:0016021;GO:0016021;GO:0016757;GO:0016757	CC:integral component of membrane;CC:integral component of membrane;MF:transferase activity, transferring glycosyl groups;MF:transferase activity, transferring glycosyl groups;	------	------	------	------	------	------	gi|75148710|sp|Q84WB7.1|GT645_ARATH;	RecName: Full=Glycosyltransferase family protein 64 protein C5; Short=GT64 C5;	PF09258.7;PF04616.11	Glyco_transf_64;Glyco_hydro_43	Glycosyl transferase family 64 domain;Glycosyl hydrolases family 43
TRINITY_DN63331_c2_g2	869	4.585	0.31	0.145	protein LURP-one-related 12-like [Asparagus officinalis]	------	------	------	------	------	------	------	------	gi|75216986|sp|Q9ZVI6.1|LOR8_ARATH;	RecName: Full=Protein LURP-one-related 8;	PF04525.9	LOR	LURP-one-related
TRINITY_DN63368_c1_g1	947	0.235	0.27	8.835	laccase-3-like [Asparagus officinalis]	GO:0046274;GO:0048046;GO:0005507;GO:0052716	BP:lignin catabolic process;CC:apoplast;MF:copper ion binding;MF:hydroquinon;	K05909	E1.10.3.2	------	------	COG2132	Q:Secondary metabolites biosynthesis, transport and catabolism	gi|75331868|sp|Q941X2.1|LAC3_ORYSJ;	RecName: Full=Laccase-3; AltName: Full=Benzenediol:oxygen oxidoreductase 3; AltName: Full=Diphenol oxidase 3; AltName: Full=Urishiol oxidase 3; Flags: Precursor;	PF00394.19	Cu-oxidase	Multicopper oxidase
TRINITY_DN63405_c3_g1	743	0	6.44	7.725		------	------	------	------	------	------	------	------	------	------	------	------	------
TRINITY_DN63413_c0_g1	2572	47.91	1.25	2.605	PREDICTED: rust resistance kinase Lr10-like [Musa acuminata subsp. malaccensis]	GO:0016021;GO:0005524;GO:0004672	CC:integral component of membrane;MF:ATP binding;MF:protein kinase activity;	------	------	------	------	COG0515	T:Signal transduction mechanisms	gi|75319119|sp|P93604.1|LRK10_WHEAT;	RecName: Full=Rust resistance kinase Lr10; AltName: Full=Probable receptor-like serine/threonine-protein kinase LRK10; Flags: Precursor;	PF00069.22;PF07714.14;PF14380.3	Pkinase;Pkinase_Tyr;WAK_assoc	Protein kinase domain;Protein tyrosine kinase;Wall-associated receptor kinase C-terminal
TRINITY_DN63492_c0_g1	515	109.355	1.85	18.52	heat shock cognate 70 kDa protein 2-like [Asparagus officinalis]	------	------	K03283	HSPA1_8	map04144;map04141;map03040	Endocytosis;Protein processing in endoplasmic reticulum;Spliceosome	------	------	gi|75308864|sp|Q9C7X7.1|HSP7N_ARATH;	RecName: Full=Heat shock 70 kDa protein 18; AltName: Full=Heat shock protein 70-18; Short=AtHsp70-18; AltName: Full=Heat-shock protein 70T-1;	PF00012.17;PF06723.10;PF10712.6	HSP70;MreB_Mbl;NAD-GH	Hsp70 protein;MreB/Mbl protein;NAD-specific glutamate dehydrogenase
TRINITY_DN63492_c0_g5	352	122.515	1.605	16.97	Heat shock cognate protein 70-1 isoform 2, partial [Theobroma cacao]	GO:0005524;GO:0005524	MF:ATP binding;MF:ATP binding;	K03283	HSPA1_8	map04144;map04141;map03040	Endocytosis;Protein processing in endoplasmic reticulum;Spliceosome	------	------	gi|18206367|sp|O65719.1|HSP7C_ARATH;	RecName: Full=Heat shock 70 kDa protein 3; AltName: Full=Heat shock cognate 70 kDa protein 3; AltName: Full=Heat shock cognate protein 70-3; Short=AtHsc70-3; AltName: Full=Heat shock protein 70-3; Short=AtHsp70-3;	PF10712.6;PF00012.17	NAD-GH;HSP70	NAD-specific glutamate dehydrogenase;Hsp70 protein
TRINITY_DN63492_c0_g6	354	50.815	6.01	1.335	PREDICTED: probable mediator of RNA polymerase II transcription subunit 37c [Fragaria vesca subsp. vesca]	GO:0005524;GO:0005524;GO:0005524	MF:ATP binding;MF:ATP binding;MF:ATP binding;	K03283	HSPA1_8	map04144;map04141;map03040	Endocytosis;Protein processing in endoplasmic reticulum;Spliceosome	------	------	gi|123650|sp|P09189.1|HSP7C_PETHY;	RecName: Full=Heat shock cognate 70 kDa protein;	PF10712.6;PF00012.17	NAD-GH;HSP70	NAD-specific glutamate dehydrogenase;Hsp70 protein
TRINITY_DN63516_c9_g1	1475	3.78	6.435	30.32	cytochrome c oxidase subunit	GO:0016021;GO:0005743;GO:0070469;GO:0016021;GO:0005743;GO:0070469;GO:0016021;GO:0005507;GO:0004129;GO:0005507;GO:0004129;GO:0005507;GO:0004129	CC:integral component of membrane;CC:mitochondrial inner membrane;CC:respiratory chain;CC:integral component of membrane;CC:mitochondrial inner membrane;CC:respiratory chain;CC:integral component of membrane;MF:copper ion binding;MF:cytochrome-c oxidase activity;MF:copper ion binding;MF:cytochrome-c oxidase activity;MF:copper ion binding;MF:cytochrome-c oxidase activity;	K02261	COX2	map00190	Oxidative phosphorylation	------	------	gi|1706052|sp|P00412.4|COX2_MAIZE;	RecName: Full=Cytochrome c oxidase subunit 2; AltName: Full=Cytochrome c oxidase polypeptide II;	------	------	------
TRINITY_DN63623_c0_g1	1103	44.63	16.34	5.05	PREDICTED: protein HEAT-STRESS-ASSOCIATED 32 [Phoenix dactylifera]	GO:0003824;GO:0003824	MF:catalytic activity;MF:catalytic activity;	------	------	------	------	COG1809	S:Function unknown	gi|75150997|sp|Q8GWL1.1|HSA32_ARATH;	RecName: Full=Protein HEAT-STRESS-ASSOCIATED 32; Short=Heat-stress-associated 32-kDa protein;	PF02679.12	ComA
TRINITY_DN63641_c7_g4	513	0.89	6.935	19.27	PREDICTED: glutamine synthetase leaf isozyme, chloroplastic [Elaeis guineensis]	GO:0006542;GO:0004356	BP:glutamine biosynthetic process;MF:glutamate-ammonia ligase activity;	K01915	glnA, GLUL	map00630;map00220;map00250;map00910	Glyoxylate and dicarboxylate metabolism;Arginine biosynthesis;Alanine, aspartate and glutamate metabolism;Nitrogen metabolism	------	------	gi|121353|sp|P15102.1|GLNA4_PHAVU;	RecName: Full=Glutamine synthetase leaf isozyme, chloroplastic; AltName: Full=Glutamate--ammonia ligase; AltName: Full=Isozyme delta; Flags: Precursor;	PF03951.16	Gln-synt_N	Glutamine synthetase, beta-Grasp domain
TRINITY_DN63645_c2_g2	1633	0	0.075	1.83	putative zinc finger, CCHC-type [Helianthus annuus]	GO:0015074;GO:0015074;GO:0015074;GO:0015074;GO:0003676;GO:0008270;GO:0003676;GO:0003676;GO:0003676;GO:0000166	BP:DNA integration;BP:DNA integration;BP:DNA integration;BP:DNA integration;MF:nucleic acid binding;MF:zinc ion binding;MF:nucleic acid binding;MF:nucleic acid binding;MF:nucleic acid binding;MF:nucleotide binding;	------	------	------	------	------	------	------	------	------	------	------
TRINITY_DN63660_c5_g3	1036	31.005	7.42	7.63	RING-H2 finger protein ATL2-like [Phalaenopsis equestris]	GO:0016021	CC:integral component of membrane;	------	------	------	------	------	------	gi|68565202|sp|Q8L9T5.2|ATL2_ARATH;	RecName: Full=RING-H2 finger protein ATL2; AltName: Full=Protein ARABIDOPSIS TOXICOS EN LEVADURA 2; Short=Protein ATL2;	PF13639.3;PF17123.2;PF13923.3;PF12678.4;PF00097.22	zf-RING_2;zf-RING_11;zf-C3HC4_2;zf-rbx1;zf-C3HC4	Ring finger domain;RING-like zinc finger;Zinc finger, C3HC4 type;RING-H2 zinc finger domain;Zinc finger, C3HC4 type
TRINITY_DN63730_c2_g5	1604	3.11	0.78	0.105	PREDICTED: aspartate carbamoyltransferase, chloroplastic [Phoenix dactylifera]	GO:0006207;GO:0006520;GO:0006207;GO:0006520;GO:0016597;GO:0004070;GO:0016597;GO:0004070	BP:'de novo' pyrimidine nucleobase biosynthetic process;BP:cellular amino acid metabolic process;BP:'de novo' pyrimidine nucleobase biosynthetic process;BP:cellular amino acid metabolic process;MF:amino acid binding;MF:aspartate carbamoyltransferase activity;MF:amino acid binding;MF:aspartate carbamoyltransferase activity;	K00609	pyrB, PYR2	map00240;map00250	Pyrimidine metabolism;Alanine, aspartate and glutamate metabolism	------	------	gi|75334843|sp|Q9LD61.1|PYRB_ORYSJ;	RecName: Full=Aspartate carbamoyltransferase, chloroplastic; AltName: Full=Aspartate transcarbamylase; Short=ATCase; Flags: Precursor;	PF00185.21	OTCace	Aspartate/ornithine carbamoyltransferase, Asp/Orn binding domain
TRINITY_DN63746_c1_g1	1292	0.215	1.855	5.275	protein CURVATURE THYLAKOID 1A, chloroplastic-like [Ananas comosus]	GO:0016021;GO:0009579;GO:0009941;GO:0009535;GO:0016021;GO:0010287	CC:integral component of membrane;CC:thylakoid;CC:chloroplast envelope;CC:chloroplast thylakoid membrane;CC:integral component of membrane;CC:plastoglobule;	------	------	------	------	------	------	gi|75097110|sp|O04616.1|CUT1A_ARATH;	RecName: Full=Protein CURVATURE THYLAKOID 1A, chloroplastic; Flags: Precursor;	------	------	------
TRINITY_DN63768_c1_g3	836	9.39	0.905	0.935	PREDICTED: growth-regulating factor 10-like [Elaeis guineensis]	GO:0032502;GO:0006355;GO:0006351;GO:0032502;GO:0006355;GO:0006351;GO:0032502;GO:0006355;GO:0006351;GO:0005634;GO:0005634;GO:0005634;GO:0005524;GO:0005524;GO:0005524	BP:developmental process;BP:regulation of transcription, DNA-templated;BP:transcription, DNA-templated;BP:developmental process;BP:regulation of transcription, DNA-templated;BP:transcription, DNA-templated;BP:developmental process;BP:regulation of transcription, DNA-templated;BP:transcription, DNA-templated;CC:nucleus;CC:nucleus;CC:nucleus;MF:ATP binding;MF:ATP binding;MF:ATP binding;	------	------	------	------	------	------	gi|75120352|sp|Q6AWX7.1|GRF12_ORYSJ;	RecName: Full=Growth-regulating factor 12; Short=OsGRF12; AltName: Full=Transcription activator GRF12;	PF08879.7;PF08880.8	WRC;QLQ	WRC;QLQ
TRINITY_DN63773_c2_g4	1193	0.05	0.045	4.68		------	------	------	------	------	------	------	------	------	------	------	------	------
TRINITY_DN63795_c2_g1	862	8.81	2.37	39	7-deoxyloganetin glucosyltransferase-like [Asparagus officinalis]	GO:0008152;GO:0008152;GO:0008152;GO:0043231;GO:0043231;GO:0016758;GO:0080043;GO:0080044;GO:0080043;GO:0080044	BP:metabolic process;BP:metabolic process;BP:metabolic process;CC:intracellular membrane-bounded organelle;CC:intracellular membrane-bounded organelle;MF:transferase activity, transferring hexosyl groups;MF:quercetin 3-O-glucosyltransferase activity;MF:quercetin 7-O-glucosyltransferase activity;MF:quercetin 3-O-glucosyltransferase activity;MF:quercetin 7-O-glucosyltransferase activity;	K21374	UGT85A	------	------	------	------	gi|334351205|sp|Q9LMF1.2|U85A3_ARATH;	RecName: Full=UDP-glycosyltransferase 85A3;	PF00201.15;PF04101.13	UDPGT;Glyco_tran_28_C	UDP-glucoronosyl and UDP-glucosyl transferase;Glycosyltransferase family 28 C-terminal domain
TRINITY_DN63796_c2_g1	3555	68.92	15.955	14.49	putative phospholipid-transporting ATPase 9 [Asparagus officinalis]	GO:0016021;GO:0005524;GO:0000287;GO:0004012	CC:integral component of membrane;MF:ATP binding;MF:magnesium ion binding;MF:phospholipid-translocating ATPase activity;	K01530;K14802	DRS2, ATP8A;E3.6.3.1	------	------	------	------	gi|12229673|sp|Q9SX33.1|ALA9_ARATH;	RecName: Full=Putative phospholipid-transporting ATPase 9; Short=AtALA9; AltName: Full=Aminophospholipid flippase 9;	PF16212.2;PF00702.23;PF13246.3;PF00122.17;PF08282.9	PhoLip_ATPase_C;Hydrolase;Cation_ATPase;E1-E2_ATPase;Hydrolase_3	Phospholipid-translocating P-type ATPase C-terminal;haloacid dehalogenase-like hydrolase;Cation transport ATPase;E1-E2 ATPase;haloacid dehalogenase-like hydrolase
TRINITY_DN63862_c2_g1	1339	0.43	1.24	7.14	uncharacterized protein LOC109705220 [Ananas comosus]	GO:0016021;GO:0005739;GO:0005886;GO:0008137	CC:integral component of membrane;CC:mitochondrion;CC:plasma membrane;MF:NADH dehydrogenas;	K03878	ND1	map00190	Oxidative phosphorylation	------	------	gi|128636|sp|P08834.1|NU1M_CITLA;	RecName: Full=NADH-ubiquinone oxidoreductase chain 1; AltName: Full=NADH dehydrogenase subunit 1;	PF00146.18	NADHdh	NADH dehydrogenase
TRINITY_DN63874_c3_g5	1646	1.78	0.045	0.12		------	------	------	------	------	------	------	------	------	------	------	------	------
TRINITY_DN63884_c7_g1	673	0	1.295	6.305		------	------	------	------	------	------	------	------	------	------	------	------	------
TRINITY_DN63908_c2_g1	221	0	68.025	185.62		------	------	------	------	------	------	------	------	------	------	------	------	------
TRINITY_DN63918_c1_g3	835	3.815	8.745	80.295	putative metal-nicotianamine transporter YSL12 [Ananas comosus]	GO:0055085;GO:0055085;GO:0055085;GO:0016021;GO:0016021;GO:0016021	BP:transmembrane transport;BP:transmembrane transport;BP:transmembrane transport;CC:integral component of membrane;CC:integral component of membrane;CC:integral component of membrane;	------	------	------	------	------	------	gi|75206004|sp|Q9SHY2.1|YSL7_ARATH;	RecName: Full=Probable metal-nicotianamine transporter YSL7; AltName: Full=Protein YELLOW STRIPE LIKE 7; Short=AtYSL7;	PF03169.12	OPT	OPT oligopeptide transporter protein
TRINITY_DN63918_c1_g4	726	6.43	9.675	52.98	putative metal-nicotianamine transporter YSL14, partial [Dichanthelium oligosanthes]	GO:0055085;GO:0055085;GO:0055085;GO:0055085;GO:0055085;GO:0016021;GO:0016021;GO:0016021;GO:0016021;GO:0016021	BP:transmembrane transport;BP:transmembrane transport;BP:transmembrane transport;BP:transmembrane transport;BP:transmembrane transport;CC:integral component of membrane;CC:integral component of membrane;CC:integral component of membrane;CC:integral component of membrane;CC:integral component of membrane;	------	------	------	------	------	------	gi|75123448|sp|Q6H7J6.1|YSL14_ORYSJ;	RecName: Full=Probable metal-nicotianamine transporter YSL14; AltName: Full=Protein YELLOW STRIPE LIKE 14; Short=OsYSL14;	PF03169.12	OPT	OPT oligopeptide transporter protein
TRINITY_DN63939_c4_g2	1304	0.255	1.055	3.25		------	------	------	------	------	------	------	------	------	------	------	------	------
TRINITY_DN63949_c6_g1	1082	0.515	0.855	11.395		------	------	------	------	------	------	------	------	------	------	------	------	------
TRINITY_DN63994_c2_g1	433	48.465	42.175	1.55	unknown [Picea sitchensis]	GO:0006457;GO:0006457;GO:0006457;GO:0006457;GO:0005524;GO:0051082;GO:0005524;GO:0051082;GO:0005524;GO:0051082;GO:0005524;GO:0051082	BP:protein folding;BP:protein folding;BP:protein folding;BP:protein folding;MF:ATP binding;MF:unfolded protein binding;MF:ATP binding;MF:unfolded protein binding;MF:ATP binding;MF:unfolded protein binding;MF:ATP binding;MF:unfolded protein binding;	K03283	HSPA1_8	map04144;map04141;map03040	Endocytosis;Protein processing in endoplasmic reticulum;Spliceosome	------	------	gi|399942|sp|Q02028.1|HSP7S_PEA;	RecName: Full=Stromal 70 kDa heat shock-related protein, chloroplastic; Flags: Precursor;	PF00012.17	HSP70	Hsp70 protein
TRINITY_DN64023_c2_g2	2204	0.485	6.425	11.79	RNA polymerase beta subunit, partia	GO:0006351;GO:0006351;GO:0006351;GO:0006351;GO:0006351;GO:0009536;GO:0009536;GO:0009536;GO:0009536;GO:0009536;GO:0003677;GO:0003899;GO:0032549;GO:0003677;GO:0003899;GO:0032549;GO:0003677;GO:0003899;GO:0032549;GO:0003677;GO:0003899;GO:0032549;GO:0003677;GO:0003899;GO:0032549	BP:transcription, DNA-templated;BP:transcription, DNA-templated;BP:transcription, DNA-templated;BP:transcription, DNA-templated;BP:transcription, DNA-templated;CC:plastid;CC:plastid;CC:plastid;CC:plastid;CC:plastid;MF:DNA binding;MF:DNA-directed RNA polymerase activity;MF:ribonucleoside binding;MF:DNA binding;MF:DNA-directed RNA polymerase activity;MF:ribonucleoside binding;MF:DNA binding;MF:DNA-…	K03043	rpoB	map00240;map03020;map00230	Pyrimidine metabolism;RNA polymerase;Purine metabolism	COG0085	K:Transcription	gi|182676548|sp|A9LYH7.1|RPOB_ACOAM;	RecName: Full=DNA-directed RNA polymerase subunit beta; AltName: Full=PEP; AltName: Full=Plastid-encoded RNA polymerase subunit beta; Short=RNA polymerase subunit beta;	PF04561.11;PF04563.12	RNA_pol_Rpb2_2;RNA_pol_Rpb2_1	RNA polymerase Rpb2, domain 2;RNA polymerase beta subunit
TRINITY_DN64092_c2_g2	2423	42.46	5.475	8.215	calcium-transporting ATPase 1, plasma membrane-type-like [Asparagus officinalis]	------	------	K01537	E3.6.3.8	------	------	------	------	gi|110832727|sp|Q2QMX9.1|ACA1_ORYSJ;	RecName: Full=Calcium-transporting ATPase 1, plasma membrane-type; AltName: Full=C;	PF00122.17;PF13246.3;PF12515.5;PF00702.23;PF00690.23;PF08282.9	E1-E2_ATPase;Cation_ATPase;CaATP_NAI;Hydrolase;Cation_ATPase_N;Hydrolase_3	E1-E2 ATPase;Cation transport ATPase;Ca2+-ATPase N terminal autoinhibitory domain;haloacid dehalogenase-like hydrolase;Cation transporter/ATPase, N-terminus;haloacid dehalogenase-like hydrolase
TRINITY_DN64109_c5_g2	483	8.05	146.15	152.035	glycosyl transferas	GO:0005739;GO:0016740	CC:mitochondrion;MF:transferase activity;	------	------	------	------	------	------	gi|110816488|sp|Q3BAI2.1|YCX91_PHAAO;	RecName: Full=Uncharacterized protein ORF91;	------	------	------
TRINITY_DN64163_c2_g1	2497	0.195	0.79	6.18	nucleolar complex protein 3 homolog [Momordica charantia]	GO:0005730	CC:nucleolus;	K14834	NOC3	------	------	------	------	------	------	------	------	------
TRINITY_DN64198_c5_g2	1406	71.43	6.805	9.52	PREDICTED: beta-amylase 1, chloroplastic [Musa acuminata subsp. malaccensis]	GO:0000272;GO:0000272;GO:0000272;GO:0016161;GO:0016161;GO:0016161	BP:polysaccharide catabolic process;BP:polysaccharide catabolic process;BP:polysaccharide catabolic process;MF:beta-amylase activity;MF:beta-amylase activity;MF:beta-amylase activity;	K01177	E3.2.1.2	map00500	Starch and sucrose metabolism	------	------	gi|75335046|sp|Q9LIR6.1|BAM1_ARATH;	RecName: Full=Beta-amylase 1, chloroplastic; AltName: Full=1,4-alpha-D-glucan maltohydrolase; AltName: Full=Beta-amylase 7; AltName: Full=Thioredoxin-regulated beta-amylase; Short=TR-BAMY; Flags: Precursor;	PF01373.14	Glyco_hydro_14	Glycosyl hydrolase family 14
TRINITY_DN64217_c8_g1	2462	69.72	22.84	10.77		------	------	------	------	------	------	------	------	------	------	------	------	------
TRINITY_DN64222_c0_g2	620	810.65	289.32	109.53	vacuolar invertase [Agave tequilana]	GO:0005975;GO:0005975;GO:0005975;GO:0005975;GO:0016021;GO:0016021;GO:0016021;GO:0004575;GO:0004553;GO:0004575;GO:0004575;GO:0016740	BP:carbohydrate metabolic process;BP:carbohydrate metabolic process;BP:carbohydrate metabolic process;BP:carbohydrate metabolic process;CC:integral component of membrane;CC:integral component of membrane;CC:integral component of membrane;MF:sucrose alpha-glucosidase activity;MF:hydrolase activity, hydrolyzing O-glycosyl compounds;MF:sucrose alpha-glucosidase activity;MF:sucrose alpha-glucosidase …	K21351	SST	------	------	------	------	gi|75284466|sp|Q5FC15.1|GFT_ASPOF;	RecName: Full=;	PF08244.9	Glyco_hydro_32C	Glycosyl hydrolases family 32 C terminal
TRINITY_DN64255_c2_g1	1808	1.175	44.545	10.755		------	------	------	------	------	------	------	------	------	------	------	------	------
TRINITY_DN64266_c4_g1	1049	572.92	62.54	60.58	ABC transporter G family member 39 [Setaria italica]	GO:0016021;GO:0005524;GO:0016887	CC:integral component of membrane;MF:ATP binding;MF:ATPase activity;	------	------	------	------	------	------	gi|75328828|sp|Q8GU88.1|AB39G_ORYSJ;	RecName: Full=ABC transporter G family member 39; Short=OsABCG39; AltName: Full=Pleiotropic drug resistance protein 7; Short=OsPDR7;	PF01061.21	ABC2_membrane	ABC-2 type transporter
TRINITY_DN64266_c5_g1	3036	930.075	150.235	168.58	PREDICTED: ABC transporter G family member 39 [Elaeis guineensis]	GO:0016021;GO:0005524;GO:0016887	CC:integral component of membrane;MF:ATP binding;MF:ATPase activity;	------	------	------	------	COG0842	V:Defense mechanisms	gi|75328828|sp|Q8GU88.1|AB39G_ORYSJ;	RecName: Full=ABC transporter G family member 39; Short=OsABCG39; AltName: Full=Pleiotropic drug resistance protein 7; Short=OsPDR7;	PF01061.21;PF00005.24;PF00004.26;PF13481.3;PF13245.3;PF08370.8;PF13304.3	ABC2_membrane;ABC_tran;AAA;AAA_25;AAA_19;PDR_assoc;AAA_21	ABC-2 type transporter;ABC transporter;ATPase family associated with various cellular activities;AAA domain;Part of AAA domain;Plant PDR ABC transporter associated;AAA domain, putative AbiEii toxin, Type IV TA system
TRINITY_DN64279_c4_g1	885	48.115	10.035	8.155	PREDICTED: NAC domain-containing protein 17-like [Phoenix dactylifera]	GO:0006355;GO:0006351;GO:0006355;GO:0006351;GO:0016021;GO:0005634;GO:0016021;GO:0005634;GO:0003677;GO:0003677	BP:regulation of transcription, DNA-templated;BP:transcription, DNA-templated;BP:regulation of transcription, DNA-templated;BP:transcription, DNA-templated;CC:integral component of membrane;CC:nucleus;CC:integral component of membrane;CC:nucleus;MF:DNA binding;MF:DNA binding;	------	------	------	------	------	------	gi|75215689|sp|Q9XIC5.1|NAC17_ARATH;	RecName: Full=NAC domain-containing protein 17; Short=ANAC017; AltName: Full=Protein NTM1-like 7; AltName: Full=Protein REGULATORS OF AOX1A 2;	PF02365.12	NAM	No apical meristem
TRINITY_DN64293_c5_g2	2391	40.385	9.48	15.81	mitogen-activated protein kinase kinase kinase 5-like [Asparagus officinalis]	GO:0005622;GO:0005524;GO:0004709	CC:intracellular;MF:ATP binding;MF:MAP kinase kinase kinase activity;	------	------	------	------	------	------	gi|75333641|sp|Q9CAD5.1|YODA_ARATH;	RecName: Full=Mitogen-activated protein kinase kinase kinase YODA; AltName: Full=YODA MAPKK kinase;	PF00069.22	Pkinase	Protein kinase domain
TRINITY_DN64315_c4_g4	494	32.085	127.115	158.215	hypothetical protei	GO:0005739	CC:mitochondrion;	------	------	------	------	------	------	------	------	------	------	------
TRINITY_DN64348_c7_g1	1792	25.115	178.445	256.71	PREDICTED: uncharacterized protein LOC105046722 isoform X2 [Elaeis guineensis]	------	------	K12865	PQBP1, NPW38	map03040	Spliceosome	------	------	gi|74735456|sp|O60828.1|PQBP1_HUMAN;	RecName: Full=Polyglutamine-binding protein 1; Short=PQBP-1; AltName: Full=38 kDa nuclear protein containing a WW domain; Short=Npw38; AltName: Full=Polyglutamine tract-binding protein 1 >gi|146325085|sp|A1YFA7.1|PQBP1_GORGO RecName: Full=Polyglutamine-binding protein 1; Short=PQBP-1; AltName: Full=Polyglutamine tract-binding protein 1;	PF00397.23	WW	WW domain
TRINITY_DN64362_c5_g1	1293	0.465	1.465	6.935	PREDICTED: uncharacterized protein LOC109330987, partial [Lupinus angustifolius]	GO:0042773;GO:0042773;GO:0042773;GO:0016021;GO:0005743;GO:0070469;GO:0016021;GO:0005743;GO:0070469;GO:0016021;GO:0005743;GO:0005739;GO:0070469;GO:0008137;GO:0008137;GO:0008137	BP:ATP synthesis coupled electron transport;BP:ATP synthesis coupled electron transport;BP:ATP synthesis coupled electron transport;CC:integral component of membrane;CC:mitochondrial inner membrane;CC:respiratory chain;CC:integral component of membrane;CC:mitochondrial inner membrane;CC:respiratory chain;CC:integral component of membrane;CC:mitochondrial inner membrane;CC:mitochondrion;CC:respira…	K03883	ND5	map00190	Oxidative phosphorylation	------	------	gi|2499271|sp|Q36284.1|NU5M_MAIZE;	RecName: Full=NADH-ubiquinone oxidoreductase chain 5; AltName: Full=NADH dehydrogenase subunit 5;	------	------	------
TRINITY_DN64393_c0_g1	1939	5.1	3.235	1.275		------	------	------	------	------	------	------	------	------	------	------	------	------
TRINITY_DN64408_c4_g1	3084	4.86	26.575	28.91	zinc finger protein CONSTANS-LIKE 9-like [Asparagus officinalis]	GO:0005622;GO:0005634;GO:0008270;GO:0008270	CC:intracellular;CC:nucleus;MF:zinc ion binding;MF:zinc ion binding;	------	------	------	------	------	------	gi|17433067|sp|Q9LUA9.1|COL10_ARATH;	RecName: Full=Zinc finger protein CONSTANS-LIKE 10;	PF06203.11;PF00643.21	CCT;zf-B_box	CCT motif;B-box zinc finger
TRINITY_DN64430_c2_g1	3079	22.325	2.34	2.69	uncharacterized protein A4U43_C07F11860 [Asparagus officinalis]	GO:0016021;GO:0005524;GO:0042626	CC:integral component of membrane;MF:ATP binding;MF:ATPase activity, coupled to transmembrane movement of substances;	K05658	ABCB1, CD243	map02010	ABC transporters	COG1132	V:Defense mechanisms	gi|75318687|sp|O80725.1|AB4B_ARATH;	RecName: Full=ABC transporter B family member 4; Short=ABC transporter ABCB.4; Short=AtABCB4; AltName: Full=Multidrug resistance protein 4; AltName: Full=P-glycoprotein 4;	PF00664.20;PF00005.24;PF02463.16;PF13555.3;PF09818.6	ABC_membrane;ABC_tran;SMC_N;AAA_29;ABC_ATPase	ABC transporter transmembrane region;ABC transporter;RecF/RecN/SMC N terminal domain;P-loop containing region of AAA domain;Predicted ATPase of the ABC class
TRINITY_DN64431_c3_g1	3057	6.925	13.635	38.065	NADH-plastoquinone oxidoreductase subunit	GO:0019684;GO:0019684;GO:0019684;GO:0009535;GO:0016021;GO:0009535;GO:0016021;GO:0009535;GO:0016021;GO:0016021;GO:0005886;GO:0009536;GO:0008137;GO:0048038;GO:0008137;GO:0048038;GO:0008137;GO:0048038;GO:0008137;GO:0048038	BP:photosynthesis, light reaction;BP:photosynthesis, light reaction;BP:photosynthesis, light reaction;CC:chloroplast thylakoid membrane;CC:integral component of membrane;CC:chloroplast thylakoid membrane;CC:integral component of membrane;CC:chloroplast thylakoid membrane;CC:integral component of membrane;CC:integral component of membrane;CC:plasma membrane;CC:plastid;MF:NADH dehydrogenas;MF:quino…	K05574	ndhC	map00190	Oxidative phosphorylation	COG0838	C:Energy production and conversion	gi|122239945|sp|Q0G9L4.1|NU3C_LIRTU;	RecName: Full=NA;	PF00507.16;PF00401.17	Oxidored_q4;ATP-synt_DE	NADH-ubiquinone/plastoquinone oxidoreductase, chain 3;ATP synthase, Delta/Epsilon chain, long alpha-helix domain
TRINITY_DN64435_c1_g3	1210	0.82	1.28	3.965	hypothetical protein T459_01347 [Capsicum annuum]	GO:0005739;GO:0016021	CC:mitochondrion;CC:integral component of membrane;	------	------	------	------	------	------	------	------	------	------	------
TRINITY_DN64466_c2_g2	1674	2.52	19.465	13.615	NADH dehydrogenase subunit	GO:0042773;GO:0042773;GO:0042773;GO:0042773;GO:0016021;GO:0005739;GO:0016021;GO:0005739;GO:0016021;GO:0016021;GO:0008137;GO:0008137;GO:0008137;GO:0008137	BP:ATP synthesis coupled electron transport;BP:ATP synthesis coupled electron transport;BP:ATP synthesis coupled electron transport;BP:ATP synthesis coupled electron transport;CC:integral component of membrane;CC:mitochondrion;CC:integral component of membrane;CC:mitochondrion;CC:integral component of membrane;CC:integral component of membrane;MF:NADH dehydrogenas;MF:NADH dehydrogenas;MF:NADH deh…	K03881	ND4	map00190	Oxidative phosphorylation	------	------	gi|44888246|sp|P93313.2|NU4M_ARATH;	RecName: Full=NADH-ubiquinone oxidoreductase chain 4; AltName: Full=NADH dehydrogenase subunit 4;	PF00361.17	Proton_antipo_M	Proton-conducting membrane transporter
TRINITY_DN64470_c10_g2	1155	4.595	0.23	0		------	------	------	------	------	------	------	------	------	------	------	------	------
TRINITY_DN64510_c1_g2	468	50.955	8.73	7.035	NADPH--cytochrome P450 reductase-like [Asparagus officinalis]	GO:0005789;GO:0016021;GO:0005789;GO:0016021;GO:0050660;GO:0010181;GO:0050661;GO:0003958;GO:0050660;GO:0010181;GO:0050661;GO:0003958	CC:endoplasmic reticulum membrane;CC:integral component of membrane;CC:endoplasmic reticulum membrane;CC:integral component of membrane;MF:flavin adenine dinucleotide binding;MF:FMN binding;MF:NADP binding;MF:NADPH-hemoprotein reductase activity;MF:flavin adenine dinucleotide binding;MF:FMN binding;MF:NADP binding;MF:NADPH-hemoprotein reductase activity;	K00327	POR	------	------	------	------	gi|75337683|sp|Q9SUM3.1|NCPR2_ARATH;	RecName: Full=NADPH--cytochrome P450 reductase 2; Short=CPR 2; Short=P450R 2;	PF00258.22	Flavodoxin_1	Flavodoxin
TRINITY_DN64523_c5_g1	1607	0.94	1.34	33.34	PREDICTED: scopoletin glucosyltransferase-like [Phoenix dactylifera]	GO:0008152;GO:0016758	BP:metabolic process;MF:transferase activity, transferring hexosyl groups;	------	------	------	------	------	------	gi|75308024|sp|Q9AT54.1|SCGT_TOBAC;	RecName: Full=Scopoletin glucosyltransferase; AltName: Full=Phenylpropanoid:glucosyltransferase 1;	PF00201.15;PF13579.3	UDPGT;Glyco_trans_4_4	UDP-glucoronosyl and UDP-glucosyl transferase;Glycosyl transferase 4-like domain
TRINITY_DN64556_c5_g1	519	45.675	0.89	1.3		------	------	------	------	------	------	------	------	------	------	------	------	------
TRINITY_DN64571_c3_g3	618	58.04	5.49	256.15		------	------	------	------	------	------	------	------	------	------	------	------	------
TRINITY_DN64579_c5_g7	507	3.46	66.53	41.505	aquaporin plasma intrinsic protein 2 [Allium sativum]	GO:0016021;GO:0016021;GO:0016021;GO:0015267;GO:0015267;GO:0015267	CC:integral component of membrane;CC:integral component of membrane;CC:integral component of membrane;MF:channel activity;MF:channel activity;MF:channel activity;	K09872	PIP	------	------	COG0580	G:Carbohydrate transport and metabolism	gi|75307943|sp|Q9AQU5.1|PIP13_MAIZE;	RecName: Full=Aquaporin PIP1-3/PIP1-4; AltName: Full=Plasma membrane intrinsic protein 1-3; AltName: Full=Plasma membrane intrinsic protein 1-4; AltName: Full=ZmPIP1-3; AltName: Full=ZmPIP1-4; AltName: Full=ZmPIP1;3; AltName: Full=ZmPIP1;4;	PF00230.17	MIP	Major intrinsic protein
TRINITY_DN64598_c5_g2	987	7.635	2.075	1.23	C2 and GRAM domain-containing protein At1g03370 [Asparagus officinalis]	------	------	------	------	------	------	------	------	gi|75315948|sp|Q9ZVT9.4|C2GR1_ARATH;	RecName: Full=C2 and GRAM domain-containing protein At1g03370;	PF00168.27;PF02893.17	C2;GRAM	C2 domain;GRAM domain
TRINITY_DN64598_c5_g5	2257	14.085	2.765	1.715	C2 and GRAM domain-containing protein At1g03370 [Asparagus officinalis]	------	------	------	------	------	------	------	------	gi|75315948|sp|Q9ZVT9.4|C2GR1_ARATH;	RecName: Full=C2 and GRAM domain-containing protein At1g03370;	PF16016.2;PF00168.27	DUF4782;C2	Domain of unknown function;C2 domain
TRINITY_DN64604_c2_g1	1888	277.465	20.88	29.17	PREDICTED: calcium-dependent protein kinase 18 isoform X2 [Elaeis guineensis]	GO:0005524;GO:0005509;GO:0004672;GO:0005524;GO:0005509;GO:0004672;GO:0005524;GO:0005509;GO:0004672	MF:ATP binding;MF:calcium ion binding;MF:protein kinase activity;MF:ATP binding;MF:calcium ion binding;MF:protein kinase activity;MF:ATP binding;MF:calcium ion binding;MF:protein kinase activity;	K13412	CPK	map04626	Plant-pathogen interaction	------	------	gi|75334005|sp|Q9FKW4.1|CDPKS_ARATH;	RecName: Full=Calcium-dependent protein kinase 28;	PF00069.22;PF07714.14	Pkinase;Pkinase_Tyr	Protein kinase domain;Protein tyrosine kinase
TRINITY_DN64604_c2_g3	530	94.265	10.385	7.38	calcium-dependent protein kinase 18 isoform X2 [Asparagus officinalis]	GO:0005524;GO:0005509;GO:0004672;GO:0005524;GO:0005509;GO:0004672;GO:0005524;GO:0005509;GO:0004672	MF:ATP binding;MF:calcium ion binding;MF:protein kinase activity;MF:ATP binding;MF:calcium ion binding;MF:protein kinase activity;MF:ATP binding;MF:calcium ion binding;MF:protein kinase activity;	K13412	CPK	map04626	Plant-pathogen interaction	------	------	gi|75334005|sp|Q9FKW4.1|CDPKS_ARATH;	RecName: Full=Calcium-dependent protein kinase 28;	PF00036.29;PF13202.3;PF13405.3;PF13499.3;PF13833.3;PF10591.6	EF-hand_1;EF-hand_5;EF-hand_6;EF-hand_7;EF-hand_8;SPARC_Ca_bdg	EF hand;EF hand;EF-hand domain;EF-hand domain pair;EF-hand domain pair;Secreted protein acidic and rich in cysteine Ca binding region
TRINITY_DN64622_c1_g1	1206	1.305	3.475	16.7	hypothetical protein SETIT_020764mg [Setaria italica]	GO:0005739;GO:0005739;GO:0005739;GO:0051287;GO:0016651;GO:0048038;GO:0051287;GO:0016651;GO:0048038;GO:0051287;GO:0016651;GO:0048038;GO:0051287;GO:0016651;GO:0048038;GO:0051287;GO:0016651;GO:0048038	CC:mitochondrion;CC:mitochondrion;CC:mitochondrion;MF:NAD binding;MF:oxidoreductase activity, acting on NA;MF:quinone binding;MF:NAD binding;MF:oxidoreductase activity, acting on NA;MF:quinone binding;MF:NAD binding;MF:oxidoreductase activity, acting on NA;MF:quinone binding;MF:NAD binding;MF:oxidoreductase activity, acting on NA;MF:quinone binding;MF:NAD binding;MF:oxidoreductase activity, actin…	K03935	NDUFS2	map00190	Oxidative phosphorylation	------	------	gi|44889037|sp|P93306.2|NDUS2_ARATH;	RecName: Full=NADH dehydrogenase [ubiquinone] iron-sulfur protein 2; AltName: Full=NADH dehydrogenase subunit 7;	PF00346.16	Complex1_49kDa	Respiratory-chain NADH dehydrogenase, 49 Kd subunit
TRINITY_DN64637_c3_g1	1286	0	20.175	3.6		------	------	------	------	------	------	------	------	------	------	------	------	------
TRINITY_DN64652_c1_g1	1495	550.385	64.26	107.45	PREDICTED: palmitoyl-monogalactosyldiacylglycerol delta-7 desaturase, chloroplastic-like [Nelumbo nucifera]	GO:0006633;GO:0016021;GO:0016717	BP:fatty acid biosynthetic process;CC:integral component of membrane;MF:oxidoreductase activity, acting on paired donors, with oxidation of a pair of donors resulting in the reduction of molecular oxygen to two molecules of water;	K20416	FAD5	------	------	COG1398	I:Lipid transport and metabolism	gi|62510457|sp|Q949X0.2|ADS3_ARATH;	RecName: Full=Palmitoyl-monogalactosyldiacylglycerol delta-7 desaturase, chloroplastic; AltName: Full=Acyl-lipid desaturase 3; AltName: Full=Fatty acid desaturase 5; Short=FAD5; AltName: Full=Fatty acid desaturase B; Short=FADB; AltName: Full=Monogalactosyldiacylglycerol-specific palmitic acid desaturase; Flags: Precursor;	------	------	------
TRINITY_DN64713_c3_g1	1570	1.27	3.175	13.99	ribosomal protein L2, partia	GO:0006412;GO:0006412;GO:0006412;GO:0006412;GO:0009507;GO:0015934;GO:0015934;GO:0009536;GO:0009507;GO:0015934;GO:0015934;GO:0009536;GO:0003723;GO:0003735;GO:0016740;GO:0003723;GO:0003735;GO:0016740;GO:0019843;GO:0003735;GO:0016740;GO:0003723;GO:0003735;GO:0016740	BP:translation;BP:translation;BP:translation;BP:translation;CC:chloroplast;CC:large ribosomal subunit;CC:large ribosomal subunit;CC:plastid;CC:chloroplast;CC:large ribosomal subunit;CC:large ribosomal subunit;CC:plastid;MF:RNA binding;MF:structural constituent of ribosome;MF:transferase activity;MF:RNA binding;MF:structural constituent of ribosome;MF:transferase activity;MF:rRNA binding;MF:struct…	K02886	RP-L2, MRPL2, rplB	map03010	Ribosome	------	------	gi|160419186|sp|A4QLN5.1|RK2_LOBMA;	RecName: Full=50S ribosomal protein L2, chloroplastic;	------	------	------
TRINITY_DN64775_c2_g1	2639	0.46	2.055	6.26	ribosomal protein L	GO:0006412;GO:0006412;GO:0032543;GO:0006412;GO:0006412;GO:0005739;GO:0005840;GO:0005739;GO:0005840;GO:0005762;GO:0005739;GO:0005739;GO:0005840;GO:0005739;GO:0005840;GO:0003735;GO:0003735;GO:0003723;GO:0003735;GO:0003735;GO:0003735	BP:translation;BP:translation;BP:mitochondrial translation;BP:translation;BP:translation;CC:mitochondrion;CC:ribosome;CC:mitochondrion;CC:ribosome;CC:mitochondrial large ribosomal subunit;CC:mitochondrion;CC:mitochondrion;CC:ribosome;CC:mitochondrion;CC:ribosome;MF:structural constituent of ribosome;MF:structural constituent of ribosome;MF:RNA binding;MF:structural constituent of ribosome;MF:stru…	------	------	------	------	COG0090	J:Translation, ribosomal structure and biogenesis	gi|6094106|sp|P92812.2|RM02_ORYSJ;	RecName: Full=60S ribosomal protein L2, mitochondrial >gi|218547415|sp|P0C8K6.1|RM02_ORYSA RecName: Full=60S ribosomal protein L2, mitochondrial >gi|218551750|sp|Q2F969.2|RM02_ORYSI RecName: Full=60S ribosomal protein L2, mitochondrial;	PF00181.20	Ribosomal_L2	Ribosomal Proteins L2, RNA binding domain
TRINITY_DN64780_c6_g1	913	0	0	3.825	PREDICTED: expansin-A1-like [Populus euphratica]	GO:0009664;GO:0005618;GO:0005576;GO:0016020	BP:plant-type cell wall organization;CC:cell wall;CC:extracellular region;CC:membrane;	------	------	------	------	------	------	gi|115502385|sp|O80622.2|EXP15_ARATH;	RecName: Full=Expansin-A15; Short=AtEXPA15; AltName: Full=Alpha-expansin-15; Short=At-EXP15; Short=AtEx15; AltName: Full=Ath-ExpAlpha-1.3; Flags: Precursor;	PF01357.18	Pollen_allerg_1	Pollen allergen
TRINITY_DN64787_c3_g4	969	70.36	9.18	12.35	formin-like protein 5 [Phalaenopsis equestris]	------	------	------	------	------	------	------	------	gi|122167218|sp|Q0D5P3.1|FH11_ORYSJ;	RecName: Full=Formin-like protein 11; AltName: Full=OsFH11; Flags: Precursor;	PF02181.20	FH2	Formin Homology 2 Domain
TRINITY_DN64813_c1_g1	611	18.845	0.68	0.695	PREDICTED: receptor-like serine/threonine-protein kinase SD1-8 [Elaeis guineensis]	GO:0048544;GO:0048544;GO:0016021;GO:0016021;GO:0005524;GO:0004672;GO:0005524;GO:0004674	BP:recognition of pollen;BP:recognition of pollen;CC:integral component of membrane;CC:integral component of membrane;MF:ATP binding;MF:protein kinase activity;MF:ATP binding;MF:protein serine/threonine kinase activity;	------	------	------	------	------	------	gi|75318808|sp|O81905.1|SD18_ARATH;	RecName: Full=Receptor-like serine/threonine-protein kinase SD1-8; AltName: Full=Arabidopsis thaliana receptor kinase 3; AltName: Full=S-domain-1;	PF08276.8;PF15102.3	PAN_2;TMEM154	PAN-like domain;TMEM154 protein family
TRINITY_DN64817_c10_g2	4334	59.5	15.29	7.235		------	------	------	------	------	------	------	------	------	------	PF10192.6	GpcrRhopsn4	Rhodopsin-like GPCR transmembrane domain
TRINITY_DN64820_c2_g4	1957	1.07	1.53	13.055	hypothetical protein MA16_Dca028833 [Dendrobium catenatum]	GO:0005739	CC:mitochondrion;	K03879	ND2	map00190	Oxidative phosphorylation	------	------	gi|42559318|sp|O05000.2|NU2M_ARATH;	RecName: Full=NADH-ubiquinone oxidoreductase chain 2; AltName: Full=NADH dehydrogenase subunit 2;	------	------	------
TRINITY_DN64838_c3_g7	966	27.425	205.77	307.15	unnamed protein product [Triticum aestivum]	------	------	------	------	------	------	------	------	gi|41017293|sp|P93276.1|M030_ARATH;	RecName: Full=Uncharacterized mitochondrial protein AtMg00030; AltName: Full=ORF107a;	------	------	------
TRINITY_DN64858_c9_g1	475	21.02	0	0.84	PREDICTED: leucine-rich repeat receptor protein kinase EMS1-like, partial [Elaeis guineensis]	------	------	------	------	------	------	------	------	gi|75262640|sp|Q9FL28.1|FLS2_ARATH;	RecName: Full=LRR receptor-like serine/threonine-protein kinase FLS2; AltName: Full=Protein FLAGELLIN-SENSING 2; AltName: Full=Protein FLAGELLIN-SENSITIVE 2; Flags: Precursor;	PF12799.4;PF13855.3;PF00560.30	LRR_4;LRR_8;LRR_1	Leucine Rich repeats;Leucine rich repeat;Leucine Rich Repeat
TRINITY_DN64873_c1_g1	2822	2.235	0.34	0.085		------	------	------	------	------	------	------	------	------	------	------	------	------
TRINITY_DN67517_c0_g1	703	0	8.435	4.955	PREDICTED: glutathione S-transferase U17-like [Phoenix dactylifera]	GO:0016740;GO:0016740	MF:transferase activity;MF:transferase activity;	K00799	GST, gst	map00480	Glutathione metabolism	------	------	gi|75338642|sp|Q9XIF8.1|GSTUG_ARATH;	RecName: Full=Glutathione S-transferase U16; Short=AtGSTU16; AltName: Full=GST class-tau member 16;	------	------	------
TRINITY_DN70902_c0_g1	606	0	0	4.5	uncharacterized protein LOC109720554 [Ananas comosus]	------	------	------	------	------	------	------	------	------	------	------	------	------
