# Supplementary material for: Iris lactea var. chinensis Plant Drought Tolerance Depends on Response of Proline Metabolism, Transcription Factors, Transporters and the ROS Scavenging System
Source: Research Square preprint supplement (doi:10.21203/rs.3.rs-1312283/v1), 2022-02-08
Supplement: Supplementary file 7 [file ca2d37fc318f553ab48f339a.xlsx]

## Sheet: Table S2
Table S2. Up- and down-regulation DEGs in comparison groups T/CK
Gene_id	Length	CK	T	R	NR description	GO_id	GO_term	KO_id	KO_name	Pathway_id	Pathway_definition	COG_id	COG_Functional Categories	Swiss-Prot_hit-name	Swiss-Prot_description	Pfam_id	Domain	Domain description
TRINITY_DN26235_c0_g1	660	3.3	0	0.445		------	------	------	------	------	------	------	------	------	------	------	------	------
TRINITY_DN30230_c0_g1	790	3.11	0	0.745		------	------	------	------	------	------	------	------	------	------	------	------	------
TRINITY_DN38014_c1_g1	1143	2.76	0	0.195	hypothetical protein CDL12_15503 [Handroanthus impetiginosus]	------	------	------	------	------	------	------	------	------	------	PF14111.3	DUF4283	Domain of unknown function
TRINITY_DN39125_c0_g1	911	0	1.5	0		------	------	------	------	------	------	------	------	------	------	------	------	------
TRINITY_DN39707_c0_g1	608	0.43	13.78	2.995	uncharacterized protein LOC109713643 [Ananas comosus]	------	------	------	------	------	------	------	------	------	------	------	------	------
TRINITY_DN40904_c0_g1	1421	0	2.345	0.4	uncharacterized protein A4U43_C04F4090 [Asparagus officinalis]	GO:0016874;GO:0004842;GO:0016874;GO:0004842	MF:ligase activity;MF:ubiquitin-protein transferase activity;MF:ligase activity;MF:ubiquitin-protein transferase activity;	------	------	------	------	------	------	gi|353558687|sp|D1FP57.1|LIN2_LOTJA;	RecName: Full=Putative E3 ubiquitin-protein ligase LIN-2; Short=LjLIN;	------	------	------
TRINITY_DN41036_c0_g1	372	9.145	0	15.76		------	------	------	------	------	------	------	------	------	------	------	------	------
TRINITY_DN41167_c0_g1	1026	1.08	7.925	2.155	protein STAR1 [Ananas comosus]	GO:0035435;GO:0035435;GO:0010044;GO:0015786;GO:0035435;GO:0005886;GO:0005774;GO:0012506;GO:0016020;GO:0005524;GO:0016887;GO:0005315;GO:0005524;GO:0016887;GO:0005315;GO:0005460;GO:0005524;GO:0016887;GO:0005315	BP:phosphate ion transmembrane transport;BP:phosphate ion transmembrane transport;BP:response to aluminum ion;BP:UDP-glucose transport;BP:phosphate ion transmembrane transport;CC:plasma membrane;CC:vacuolar membrane;CC:vesicle membrane;CC:membrane;MF:ATP binding;MF:ATPase activity;MF:inorganic phosphate transmembrane transporter activity;MF:ATP binding;MF:ATPase activity;MF:inorganic phosphate tr…	------	------	------	------	COG1117	P:Inorganic ion transport and metabolism	gi|122167879|sp|Q0D9V6.1|STAR1_ORYSJ;	RecName: Full=Protein STAR1; AltName: Full=ABC transporter ABCI.12; Short=OsABCI12; AltName: Full=ABC transporter I family member 12; AltName: Full=Protein ALUMINUM SENSITIVE 1; AltName: Full=Protein SENSITIVE TO ALUMINUM RHIZOTOXICITY 1;	PF00005.24;PF13304.3;PF02463.16;PF13555.3;PF13604.3;PF13191.3;PF13401.3;PF02456.12	ABC_tran;AAA_21;SMC_N;AAA_29;AAA_30;AAA_16;AAA_22;Adeno_IVa2	ABC transporter;AAA domain, putative AbiEii toxin, Type IV TA system;RecF/RecN/SMC N terminal domain;P-loop containing region of AAA domain;AAA domain;AAA ATPase domain;AAA domain;Adenovirus IVa2 protein
TRINITY_DN41300_c0_g1	512	0.515	16.54	17.915		------	------	------	------	------	------	------	------	------	------	PF07859.10	Abhydrolase_3	alpha/beta hydrolase fold
TRINITY_DN41380_c0_g1	1083	2.03	12.095	15.56	PREDICTED: 50S ribosomal protein L25-like [Phoenix dactylifera]	GO:0006412;GO:0006412;GO:0006412;GO:0005840;GO:0005840;GO:0008097;GO:0003735;GO:0008097;GO:0003735	BP:translation;BP:translation;BP:translation;CC:ribosome;CC:ribosome;MF:5S rRNA binding;MF:structural constituent of ribosome;MF:5S rRNA binding;MF:structural constituent of ribosome;	K02897	RP-L25, rplY	map03010	Ribosome	------	------	gi|166223699|sp|A5CF34.1|RL25_ORITB;	RecName: Full=50S ribosomal protein L25; AltName: Full=General stress protein CTC;	PF14693.3;PF01386.16	Ribosomal_TL5_C;Ribosomal_L25p	Ribosomal protein TL5, C-terminal domain;Ribosomal L25p family
TRINITY_DN41652_c0_g1	839	1.155	14.825	1.225	LOW QUALITY PROTEIN: oil body-associated protein 1A-like [Asparagus officinalis]	------	------	------	------	------	------	------	------	gi|1027923650|sp|B4FFZ9.1|OBP1A_MAIZE;	RecName: Full=Oil body-associated protein 1A;	PF06884.8	DUF1264	Protein of unknown function
TRINITY_DN42069_c0_g1	875	10.155	0.835	52.625	dirigent protein 5-like [Asparagus officinalis]	GO:0048046	CC:apoplast;	------	------	------	------	------	------	gi|75205429|sp|Q9SH66.1|DIR5_ARATH;	RecName: Full=Dirigent protein 5; Short=AtDIR5; Flags: Precursor;	PF03018.11	Dirigent	Dirigent-like protein
TRINITY_DN42099_c0_g1	865	24.06	1.85	7.855		------	------	------	------	------	------	------	------	------	------	PF03242.10	LEA_3	Late embryogenesis abundant protein
TRINITY_DN42277_c0_g1	2303	7.22	1.585	6.045	PREDICTED: pyruvate kinase isozyme G, chloroplastic isoform X1 [Phoenix dactylifera]	GO:0016301;GO:0000287;GO:0030955;GO:0004743;GO:0016301;GO:0000287;GO:0030955;GO:0004743;GO:0016301;GO:0000287;GO:0030955;GO:0004743	MF:kinase activity;MF:magnesium ion binding;MF:potassium ion binding;MF:pyruvate kinase activity;MF:kinase activity;MF:magnesium ion binding;MF:potassium ion binding;MF:pyruvate kinase activity;MF:kinase activity;MF:magnesium ion binding;MF:potassium ion binding;MF:pyruvate kinase activity;	K00873	PK, pyk	map00010;map00230;map00620	Glycolysis / Gluconeogenesis;Purine metabolism;Pyruvate metabolism	COG0469	G:Carbohydrate transport and metabolism	gi|2497542|sp|Q40546.1|KPYG_TOBAC;	RecName: Full=Pyruvate kinase isozyme G, chloroplastic; Flags: Precursor;	PF00224.18;PF02887.13;PF03328.11	PK;PK_C;HpcH_HpaI	Pyruvate kinase, barrel domain;Pyruvate kinase, alpha/beta domain;HpcH/HpaI aldolase/citrate lyase family
TRINITY_DN42427_c0_g1	1203	3.505	20.305	6.335	glucose-1-phosphate adenylyltransferase large subunit 1-like isoform X1 [Asparagus officinalis]	GO:0005978;GO:0019252;GO:0005978;GO:0005978;GO:0019252;GO:0005978;GO:0019252;GO:0009507;GO:0009507;GO:0009507;GO:0005524;GO:0008878;GO:0008878;GO:0005524;GO:0008878;GO:0005524;GO:0008878	BP:glycogen biosynthetic process;BP:starch biosynthetic process;BP:glycogen biosynthetic process;BP:glycogen biosynthetic process;BP:starch biosynthetic process;BP:glycogen biosynthetic process;BP:starch biosynthetic process;CC:chloroplast;CC:chloroplast;CC:chloroplast;MF:ATP binding;MF:glucose-1-phosphate adenylyltransferase activity;MF:glucose-1-phosphate adenylyltransferase activity;MF:ATP bin…	K00975	glgC	map00520;map00500	Amino sugar and nucleotide sugar metabolism;Starch and sucrose metabolism	COG0448	G:Carbohydrate transport and metabolism	gi|1707922|sp|P55233.1|GLGL1_BETVU;	RecName: Full=Glucose-1-phosphate adenylyltransferase large subunit, chloroplastic/amyloplastic; AltName: Full=ADP-glucose pyrophosphorylase; AltName: Full=ADP-glucose synthase; AltName: Full=AGPase S; AltName: Full=Alpha-D-glucose-1-phosphate adenyl transferase; Flags: Precursor;	PF00483.20	NTP_transferase	Nucleotidyl transferase
TRINITY_DN42575_c3_g1	855	0	5.33	1.47		------	------	------	------	------	------	------	------	------	------	------	------	------
TRINITY_DN42755_c1_g1	870	26.56	4.235	11.955	PREDICTED: receptor-like serine/threonine-protein kinase SD1-8 isoform X1 [Phoenix dactylifera]	GO:0048544;GO:0048544;GO:0048544;GO:0016021;GO:0016021;GO:0016021;GO:0005524;GO:0004672;GO:0005524;GO:0004674;GO:0005524;GO:0004674	BP:recognition of pollen;BP:recognition of pollen;BP:recognition of pollen;CC:integral component of membrane;CC:integral component of membrane;CC:integral component of membrane;MF:ATP binding;MF:protein kinase activity;MF:ATP binding;MF:protein serine/threonine kinase activity;MF:ATP binding;MF:protein serine/threonine kinase activity;	------	------	------	------	------	------	gi|75318808|sp|O81905.1|SD18_ARATH;	RecName: Full=Receptor-like serine/threonine-protein kinase SD1-8; AltName: Full=Arabidopsis thaliana receptor kinase 3; AltName: Full=S-domain-1;	PF08276.8;PF07714.14;PF00954.17;PF00069.22	PAN_2;Pkinase_Tyr;S_locus_glycop;Pkinase	PAN-like domain;Protein tyrosine kinase;S-locus glycoprotein domain;Protein kinase domain
TRINITY_DN42795_c3_g1	1301	32.905	0.51	6.815	polygalacturonase inhibitor-like [Asparagus officinalis]	------	------	------	------	------	------	------	------	gi|464367|sp|Q05091.1|PGIP_PYRCO;	RecName: Full=Polygalacturonase inhibitor; AltName: Full=Polygalacturonase-inhibiting protein; Short=PGIG; Flags: Precursor;	PF13855.3;PF08263.9;PF12799.4	LRR_8;LRRNT_2;LRR_4	Leucine rich repeat;Leucine rich repeat N-terminal domain;Leucine Rich repeats
TRINITY_DN42797_c0_g1	562	34.145	1.89	9.775	proline dehydrogenase 2, mitochondrial-like [Asparagus officinalis]	GO:0006562;GO:0004657	BP:proline catabolic process;MF:proline dehydrogenase activity;	K00318	PRODH	map00330	Arginine and proline metabolism	------	------	gi|6685798|sp|P92983.2|PROD1_ARATH;	RecName: Full=Proline dehydrogenase 1, mitochondrial; AltName: Full=Osmotic stress-induced proline dehydrogenase; AltName: Full=Proline oxidase; AltName: Full=Protein EARLY RESPONSIVE TO DEHYDRATION 5; Flags: Precursor;	------	------	------
TRINITY_DN42837_c2_g1	1057	0	1.21	0.58		------	------	------	------	------	------	------	------	------	------	------	------	------
TRINITY_DN42878_c0_g6	2085	0.13	1.155	0.445	Reverse transcriptase zinc-binding domain [Macleaya cordata]	GO:0003676;GO:0003964;GO:0003676;GO:0003964;GO:0003676;GO:0003964;GO:0004519;GO:0004527;GO:0003676;GO:0003676;GO:0003964	MF:nucleic acid binding;MF:RNA-directed DNA polymerase activity;MF:nucleic acid binding;MF:RNA-directed DNA polymerase activity;MF:nucleic acid binding;MF:RNA-directed DNA polymerase activity;MF:endonuclease activity;MF:exonuclease activity;MF:nucleic acid binding;MF:nucleic acid binding;MF:RNA-directed DNA polymerase activity;	------	------	------	------	------	------	gi|125987635|sp|P0C2F6.1|RNHX1_ARATH;	RecName: Full=Putative ribonuclease H protein At1g65750;	PF13456.3;PF13966.3	RVT_3;zf-RVT	Reverse transcriptase-like;zinc-binding in reverse transcriptase
TRINITY_DN42887_c6_g1	1509	2.89	54.345	19.94		------	------	------	------	------	------	------	------	------	------	------	------	------
TRINITY_DN43000_c2_g6	2017	20.545	3.645	5.82	uncharacterized protein LOC109830089 [Asparagus officinalis]	GO:0016021;GO:0016021	CC:integral component of membrane;CC:integral component of membrane;	------	------	------	------	------	------	------	------	PF04749.14;PF11204.5	PLAC8;DUF2985	PLAC8 family;Protein of unknown function
TRINITY_DN43002_c0_g1	1046	26.63	4.63	7.605	PREDICTED: plant UBX domain-containing protein 2 isoform X1 [Phoenix dactylifera]	GO:0006281;GO:0003677	BP:DNA repair;MF:DNA binding;	K14011	UBXN6, UBXD1	map04141	Protein processing in endoplasmic reticulum	------	------	gi|75216737|sp|Q9ZU93.2|PUX2_ARATH;	RecName: Full=Plant UBX domain-containing protein 2; Short=PUX2; AltName: Full=AtPUB3; AltName: Full=CDC48-interacting UBX-domain protein 2;	PF00789.17	UBX	UBX domain
TRINITY_DN43015_c2_g1	1034	0	3.195	0.49	PREDICTED: desiccation-related protein PCC13-62-like [Phoenix dactylifera]	------	------	------	------	------	------	------	------	gi|118926|sp|P22242.1|DRPE_CRAPL;	RecName: Full=Desiccation-related protein PCC13-62; Flags: Precursor [Craterostigma plantagineum];	PF13668.3	Ferritin_2	Ferritin-like domain
TRINITY_DN43075_c0_g1	2584	0	1.37	1.965	C2 and GRAM domain-containing protein [Apostasia shenzhenica]	GO:0016021;GO:0016021;GO:0016021	CC:integral component of membrane;CC:integral component of membrane;CC:integral component of membrane;	------	------	------	------	------	------	gi|75171409|sp|Q9FL59.1|FTIP1_ARATH;	RecName: Full=FT-interacting protein 1;	PF08372.7;PF00168.27	PRT_C;C2	Plant phosphoribosyltransferase C-terminal;C2 domain
TRINITY_DN43090_c1_g1	809	9.12	96.36	8.36	PREDICTED: uncharacterized protein LOC105045858 [Elaeis guineensis]	GO:0016021	CC:integral component of membrane;	K06910	K06910	------	------	COG1881	S:Function unknown	gi|6686082|sp|O26373.1|Y273_METTH;	RecName: Full=UPF0098 protein MTH_273;	PF01161.17	PBP	Phosphatidylethanolamine-binding protein
TRINITY_DN43097_c0_g1	1310	0	1.155	0.08		------	------	------	------	------	------	------	------	------	------	------	------	------
TRINITY_DN43104_c0_g1	635	3.155	0	0		------	------	------	------	------	------	------	------	------	------	------	------	------
TRINITY_DN43104_c0_g2	1046	1.74	0	0		------	------	------	------	------	------	------	------	------	------	------	------	------
TRINITY_DN43109_c3_g1	1795	17.215	3.105	9.09	putative hydrolase/acyltransferas	GO:0055089;GO:0055091;GO:0070328;GO:0055089;GO:0008654;GO:0055091;GO:0070328;GO:0055089;GO:0008654;GO:0055091;GO:0070328;GO:0005737;GO:0005737;GO:0003841;GO:0016787;GO:0042171;GO:0004623;GO:0003841;GO:0004623;GO:0003841;GO:0004623;GO:0003841;GO:0016787	BP:fatty acid homeostasis;BP:phospholipid homeostasis;BP:triglyceride homeostasis;BP:fatty acid homeostasis;BP:phospholipid biosynthetic process;BP:phospholipid homeostasis;BP:triglyceride homeostasis;BP:fatty acid homeostasis;BP:phospholipid biosynthetic process;BP:phospholipid homeostasis;BP:triglyceride homeostasis;CC:cytoplasm;CC:cytoplasm;MF:1-acylglycerol-3-phosphate O-acyltransferase activ…	------	------	------	------	------	------	gi|678000774|sp|Q0J0A4.3|LPAAT_ORYSJ;	RecName: Full=Probable 1-acylglycerol-3-phosphate O-acyltransferase; AltName: Full=Lipid droplet-binding protein CGI-58 homolog;	------	------	------
TRINITY_DN43109_c3_g4	1562	2.455	0.06	0.115		------	------	------	------	------	------	------	------	------	------	------	------	------
TRINITY_DN43130_c0_g1	820	4.02	16.98	10.915	cytochrome P450 71A1-like [Asparagus officinalis]	GO:0020037;GO:0005506;GO:0004497;GO:0016705;GO:0020037;GO:0005506;GO:0004497;GO:0016705	MF:heme binding;MF:iron ion binding;MF:monooxygenase activity;MF:oxidoreductase activity, acting on paired donors, with incorporation or reduction of molecular oxygen;MF:heme binding;MF:iron ion binding;MF:monooxygenase activity;MF:oxidoreductase activity, acting on paired donors, with incorporation or reduction of molecular oxygen;	K13029	CYP71E1	map00460	Cyanoamino acid metabolism	------	------	gi|311033356|sp|P24465.2|C71A1_PERAE;	RecName: Full=Cytochrome P450 71A1; AltName: Full=ARP-2; AltName: Full=CYPLXXIA1 [Persea americana];	PF00067.19	p450	Cytochrome P450
TRINITY_DN43138_c2_g1	722	3.3	0.045	0.24		------	------	------	------	------	------	------	------	------	------	------	------	------
TRINITY_DN43154_c5_g1	535	5.68	0.16	1.24	PREDICTED: transcription factor TGA4-like isoform X1 [Phoenix dactylifera]	GO:0006351;GO:0006351;GO:0006351;GO:0006351;GO:0006351;GO:0003700;GO:0043565;GO:0003700;GO:0043565;GO:0003700;GO:0043565;GO:0003700;GO:0043565;GO:0003700;GO:0043565	BP:transcription, DNA-templated;BP:transcription, DNA-templated;BP:transcription, DNA-templated;BP:transcription, DNA-templated;BP:transcription, DNA-templated;MF:transcription factor activity, sequence-specific DNA binding;MF:sequence-specific DNA binding;MF:transcription factor activity, sequence-specific DNA binding;MF:sequence-specific DNA binding;MF:transcription factor activity, sequence-sp…	K14431	TGA	map04075	Plant hormone signal transduction	------	------	gi|44888358|sp|Q39234.1|TGA3_ARATH;	RecName: Full=Transcription factor TGA3; AltName: Full=bZIP transcription factor 22; Short=AtbZIP22;	------	------	------
TRINITY_DN43167_c6_g1	678	0.27	6.875	4.31		------	------	------	------	------	------	------	------	------	------	------	------	------
TRINITY_DN43193_c0_g1	477	4.345	27.255	7.765		------	------	------	------	------	------	------	------	------	------	------	------	------
TRINITY_DN43242_c5_g1	446	6.09	65.295	5.81		------	------	------	------	------	------	------	------	------	------	PF02068.13	Metallothio_PEC	Plant PEC family metallothionein
TRINITY_DN43246_c2_g1	715	0.05	5.275	4.325	zinc finger MYM-type protein 1-like [Populus trichocarpa]	------	------	------	------	------	------	------	------	gi|74743897|sp|Q5SVZ6.1|ZMYM1_HUMAN;	RecName: Full=Zinc finger MYM-type protein 1;	PF14291.3	DUF4371	Domain of unknown function
TRINITY_DN43246_c2_g5	1009	0	1.205	0.945		------	------	------	------	------	------	------	------	------	------	------	------	------
TRINITY_DN43263_c5_g1	1780	0.7	42.275	3.035	cytochrome P450 90B1 isoform X1 [Carica papaya]	GO:0016132;GO:0048366;GO:0016021;GO:0016021;GO:0020037;GO:0005506;GO:0004497;GO:0016705;GO:0080132;GO:0020037;GO:0005506;GO:0004497;GO:0016705;GO:0020037;GO:0005506;GO:0004497;GO:0016705	BP:brassinosteroid biosynthetic process;BP:leaf development;CC:integral component of membrane;CC:integral component of membrane;MF:heme binding;MF:iron ion binding;MF:monooxygenase activity;MF:oxidoreductase activity, acting on paired donors, with incorporation or reduction of molecular oxygen;MF:fatty acid alpha-hydroxylase activity;MF:heme binding;MF:iron ion binding;MF:monooxygenase activity;M…	K09587	CYP90B1, DWF4	map00905	Brassinosteroid biosynthesis	------	------	gi|332278166|sp|O64989.2|C90B1_ARATH;	RecName: Full=Cytochrome P450 90B1; AltName: Full=Protein DWARF 4; Short=Dwarf4; AltName: Full=Steroid 22-alpha-hydroxylase;	PF00067.19	p450	Cytochrome P450
TRINITY_DN43342_c2_g3	390	0	11.245	2.915	Photosystem I PsaD [Trema orientalis]	GO:0015979;GO:0015979;GO:0009538;GO:0009538	BP:photosynthesis;BP:photosynthesis;CC:photosystem I reaction center;CC:photosystem I reaction center;	K02692	psaD	map00195	Photosynthesis	------	------	gi|417544|sp|P32869.1|PSAD_CUCSA;	RecName: Full=Photosystem I reaction center subunit II, chloroplastic; AltName: Full=PS I subunit 5; AltName: Full=Photosystem I 20 kDa subunit; Short=PSI-D; Flags: Precursor;	PF02531.13	PsaD	PsaD
TRINITY_DN43343_c0_g1	1787	12.405	1.945	2.915	probable serine/threonine-protein kinase PBL19 [Asparagus officinalis]	GO:0005524;GO:0004672;GO:0005524;GO:0004672	MF:ATP binding;MF:protein kinase activity;MF:ATP binding;MF:protein kinase activity;	K04733	IRAK4	------	------	COG0515	T:Signal transduction mechanisms	gi|75335460|sp|Q9LTC0.1|Y5707_ARATH;	RecName: Full=Probable receptor-like protein kinase At5g47070;	PF07714.14;PF00069.22	Pkinase_Tyr;Pkinase	Protein tyrosine kinase;Protein kinase domain
TRINITY_DN43350_c0_g1	1672	0	1.22	2.215		------	------	------	------	------	------	------	------	------	------	------	------	------
TRINITY_DN43372_c2_g3	970	0	1.34	0.12		------	------	------	------	------	------	------	------	------	------	------	------	------
TRINITY_DN43380_c7_g1	456	1.335	46.705	82.85	type 2 metallothionein-like protein, partial [Hyacinthus orientalis]	GO:0046872;GO:0046872;GO:0046872;GO:0046872	MF:metal ion binding;MF:metal ion binding;MF:metal ion binding;MF:metal ion binding;	------	------	------	------	------	------	gi|3334260|sp|O22319.2|MT2_MUSAC;	RecName: Full=Metallothionein-like protein type 2;	PF01439.15	Metallothio_2	Metallothionein
TRINITY_DN43414_c8_g2	1085	10.595	187.545	42.14	probable xyloglucan endotransglucosylase/hydrolase protein 23 [Asparagus officinalis]	GO:0042546;GO:0071555;GO:0010411;GO:0042546;GO:0071555;GO:0010411;GO:0048046;GO:0005618;GO:0048046;GO:0005618;GO:0004553;GO:0016762;GO:0004553;GO:0016762	BP:cell wall biogenesis;BP:cell wall organization;BP:xyloglucan metabolic process;BP:cell wall biogenesis;BP:cell wall organization;BP:xyloglucan metabolic process;CC:apoplast;CC:cell wall;CC:apoplast;CC:cell wall;MF:hydrolase activity, hydrolyzing O-glycosyl compounds;MF:xylogluca;MF:hydrolase activity, hydrolyzing O-glycosyl compounds;MF:xylogluca;	K14504;K08235	E2.4.1.207;TCH4	map04075	Plant hormone signal transduction	------	------	gi|38605148|sp|Q38857.1|XTH22_ARATH;	RecName: Full=Xyloglucan endotransglucosylase/hydrolase protein 22; Short=At-XTH22; Short=XTH-22; AltName: Full=Touch protein 4; Flags: Precursor;	PF00722.18;PF06955.9	Glyco_hydro_16;XET_C	Glycosyl hydrolases family 16;Xyloglucan endo-transglycosylase
TRINITY_DN43425_c0_g1	1775	2.135	0.265	0.24		------	------	------	------	------	------	------	------	------	------	------	------	------
TRINITY_DN43437_c3_g1	906	0.035	23.485	19.455		------	------	------	------	------	------	------	------	------	------	------	------	------
TRINITY_DN43437_c4_g1	1235	8.805	3.43	1.34		------	------	------	------	------	------	------	------	------	------	------	------	------
TRINITY_DN43447_c3_g3	441	1.15	26.685	14.39	R2R3 MYB transcription factor [Elaeis guineensis]	GO:0003677;GO:0003677;GO:0003677;GO:0003677	MF:DNA binding;MF:DNA binding;MF:DNA binding;MF:DNA binding;	K09422	MYBP	------	------	------	------	gi|75107028|sp|P81393.1|MYB08_ANTMA;	RecName: Full=Myb-related protein 308;	PF00249.28;PF13921.3	Myb_DNA-binding;Myb_DNA-bind_6	Myb-like DNA-binding domain;Myb-like DNA-binding domain
TRINITY_DN43450_c1_g1	688	51.015	5.305	19.21	PREDICTED: LOW QUALITY PROTEIN: L-type lectin-domain containing receptor kinase IV.1-like [Phoenix dactylifera]	GO:0016021;GO:0005524;GO:0030246;GO:0004672	CC:integral component of membrane;MF:ATP binding;MF:carbohydrate binding;MF:protein kinase activity;	------	------	------	------	------	------	gi|75337901|sp|Q9SZD5.1|LRK59_ARATH;	RecName: Full=L-type lectin-domain containing receptor kinase V.9; Short=LecRK-V.9; Flags: Precursor;	PF00139.16	Lectin_legB	Legume lectin domain
TRINITY_DN43458_c0_g1	872	9.25	0.605	0.17	putative germin-like protein 2-1 [Asparagus officinalis]	------	------	------	------	------	------	------	------	gi|75261355|sp|Q6K5Q0.1|GL21_ORYSJ;	RecName: Full=Putative germin-like protein 2-1; Flags: Precursor;	PF00190.19;PF07883.8	Cupin_1;Cupin_2	Cupin;Cupin domain
TRINITY_DN43462_c1_g5	876	85.59	18.925	28.285	PREDICTED: protein LNK2 isoform X2 [Elaeis guineensis]	------	------	------	------	------	------	------	------	gi|1018737549|sp|F4JCX9.1|LNK2_ARATH;	RecName: Full=Protein LNK2; AltName: Full=Night light-inducible and clock-regulated 2;	------	------	------
TRINITY_DN43482_c6_g2	2329	2.61	0.16	0.235		------	------	------	------	------	------	------	------	------	------	------	------	------
TRINITY_DN43519_c2_g3	347	23.715	0.56	2.51		------	------	------	------	------	------	------	------	------	------	------	------	------
TRINITY_DN43519_c2_g6	1203	5.605	33.825	38.495		------	------	------	------	------	------	------	------	------	------	------	------	------
TRINITY_DN43522_c4_g1	1776	0.03	1.04	0.69		------	------	------	------	------	------	------	------	------	------	------	------	------
TRINITY_DN43584_c4_g1	698	10.485	99.2	40.21	uncharacterized protein A4U43_C08F2330 [Asparagus officinalis]	GO:0005975;GO:0005975;GO:0005975;GO:0005975;GO:0016021;GO:0016021;GO:0004575;GO:0004553;GO:0004553;GO:0004575;GO:0016740	BP:carbohydrate metabolic process;BP:carbohydrate metabolic process;BP:carbohydrate metabolic process;BP:carbohydrate metabolic process;CC:integral component of membrane;CC:integral component of membrane;MF:sucrose alpha-glucosidase activity;MF:hydrolase activity, hydrolyzing O-glycosyl compounds;MF:hydrolase activity, hydrolyzing O-glycosyl compounds;MF:sucrose alpha-glucosidase activity;MF:tran…	K21351	SST	------	------	------	------	gi|75279773|sp|P92916.1|GFT_ALLCE;	RecName: Full=Bifunctional;	PF00251.17;PF08244.9	Glyco_hydro_32N;Glyco_hydro_32C	Glycosyl hydrolases family 32 N-terminal domain;Glycosyl hydrolases family 32 C terminal
TRINITY_DN43601_c0_g2	914	8.865	0.54	0.81	reverse transcriptase [Corchorus capsularis]	GO:0015074;GO:0015074;GO:0015074;GO:0003676;GO:0003964;GO:0008270;GO:0003676;GO:0008270;GO:0003676;GO:0003964	BP:DNA integration;BP:DNA integration;BP:DNA integration;MF:nucleic acid binding;MF:RNA-directed DNA polymerase activity;MF:zinc ion binding;MF:nucleic acid binding;MF:zinc ion binding;MF:nucleic acid binding;MF:RNA-directed DNA polymerase activity;	------	------	------	------	------	------	gi|134034966|sp|Q99315.3|YG31B_YEAST;	RecName: Full=Transposon Ty3-G Gag-Pol polyprotein; AltName: Full=Gag3-Pol3; AltName: Full=Transposon Ty3-1 TYA-TYB polyprotein; Contains: RecName: Full=Capsid protein; Short=CA; AltName: Full=p24; Contains: RecName: Full=Spacer peptide p3; Contains: RecName: Full=Nucleocapsid protein p11; Short=NC; Contains: RecName: Full=Ty3 protease; Short=PR; AltName: Full=p16; Contains: RecName: Full=Spacer …	PF00665.23	rve	Integrase core domain
TRINITY_DN43603_c1_g2	3017	3.09	0.15	0.3	uncharacterized protein A4U43_C04F15720 [Asparagus officinalis]	GO:0016021;GO:0005524;GO:0004672	CC:integral component of membrane;MF:ATP binding;MF:protein kinase activity;	K13429	CERK1	map04626	Plant-pathogen interaction	------	------	gi|75324753|sp|Q6UD73.1|LYK3_MEDTR;	RecName: Full=LysM domain receptor-like kinase 3; Short=LysM-containing receptor-like kinase 3; Short=MtLYK3; AltName: Full=LysM receptor kinase K1B; AltName: Full=Protein HAIR CURLING; Flags: Precursor;	PF07714.14;PF00069.22	Pkinase_Tyr;Pkinase	Protein tyrosine kinase;Protein kinase domain
TRINITY_DN43627_c3_g4	1273	0.13	14.97	0.085	aldo-keto reductase family 4 member C9-like [Asparagus officinalis]	GO:0016491;GO:0016491;GO:0016491;GO:0016491	MF:oxidoreductase activity;MF:oxidoreductase activity;MF:oxidoreductase activity;MF:oxidoreductase activity;	------	------	------	------	COG0656	R:General function prediction only	gi|75243290|sp|Q84TF0.1|AKRCA_ARATH;	RecName: Full=Aldo-keto reductase family 4 member C10;	PF00248.18	Aldo_ket_red	Aldo/keto reductase family
TRINITY_DN43645_c4_g1	1866	9.735	0.895	4.575	PREDICTED: IAA-amino acid hydrolase ILR1-like 6 [Elaeis guineensis]	GO:0008152;GO:0016787	BP:metabolic process;MF:hydrolase activity;	K14664;K21604	ILR1;IAR3, ILL6	------	------	COG1473	E:Amino acid transport and metabolism	gi|75252748|sp|Q5Z678.1|ILL6_ORYSJ;	RecName: Full=IAA-amino acid hydrolase ILR1-like 6; Flags: Precursor;	PF01546.25;PF07687.11	Peptidase_M20;M20_dimer	Peptidase family M20/M25/M40;Peptidase dimerisation domain
TRINITY_DN43740_c0_g2	603	77.725	6.17	7.845	protein CCA1-like isoform X2 [Asparagus officinalis]	GO:0006355;GO:0006351;GO:0006355;GO:0006351;GO:0005634;GO:0005634;GO:0003677;GO:0003677	BP:regulation of transcription, DNA-templated;BP:transcription, DNA-templated;BP:regulation of transcription, DNA-templated;BP:transcription, DNA-templated;CC:nucleus;CC:nucleus;MF:DNA binding;MF:DNA binding;	K12133	LHY	map04712	Circadian rhythm - plant	------	------	gi|269969425|sp|Q6R0H1.2|LHY_ARATH;	RecName: Full=Protein LHY; AltName: Full=MYB-related transcription factor LHY; AltName: Full=Protein LATE ELONGATED HYPOCOTYL;	------	------	------
TRINITY_DN43744_c3_g2	1012	11.51	0.19	6.935	PREDICTED: ethylene-responsive transcription factor 2-like [Musa acuminata subsp. malaccensis]	GO:0006351;GO:0006351;GO:0005634;GO:0005634;GO:0003677;GO:0003700;GO:0003677;GO:0003700	BP:transcription, DNA-templated;BP:transcription, DNA-templated;CC:nucleus;CC:nucleus;MF:DNA binding;MF:transcription factor activity, sequence-specific DNA binding;MF:DNA binding;MF:transcription factor activity, sequence-specific DNA binding;	K09286	EREBP	------	------	------	------	gi|57012756|sp|Q40476.1|ERF1_TOBAC;	RecName: Full=Ethylene-responsive transcription factor 1; Short=NtERF1; AltName: Full=Ethylene-responsive element-binding factor 1; Short=EREBP-1;	PF00847.17	AP2	AP2 domain
TRINITY_DN43764_c4_g5	627	5.67	0	0.12		------	------	------	------	------	------	------	------	------	------	------	------	------
TRINITY_DN43846_c7_g5	1601	25.66	3.025	3.94	mitogen-activated protein kinase 5 [Asparagus officinalis]	GO:0005622;GO:0005622;GO:0005622;GO:0005524;GO:0004707;GO:0005524;GO:0004707;GO:0005524;GO:0004707	CC:intracellular;CC:intracellular;CC:intracellular;MF:ATP binding;MF:MAP kinase activity;MF:ATP binding;MF:MAP kinase activity;MF:ATP binding;MF:MAP kinase activity;	K20536	MPK3	map04016	MAPK signaling pathway - plant	------	------	gi|122247193|sp|Q10N20.1|MPK5_ORYSJ;	RecName: Full=Mitogen-activated protein kinase 5; Short=MAP kinase 5; AltName: Full=Benzothiadiazole-induced MAP kinase 1; AltName: Full=MAP kinase 2; AltName: Full=Multiple stress-responsive MAP kinase 2; AltName: Full=OsBIMK1; AltName: Full=OsMAP1; AltName: Full=OsMAPK2; AltName: Full=OsMAPK5; AltName: Full=OsMPK3; AltName: Full=OsMSRMK2 >gi|158513192|sp|A2XFC8.2|MPK5_ORYSI RecName: Full=Mitoge…	PF00069.22;PF07714.14;PF06293.11;PF14531.3	Pkinase;Pkinase_Tyr;Kdo;Kinase-like	Protein kinase domain;Protein tyrosine kinase;Lipopolysaccharide kinase;Kinase-like
TRINITY_DN43904_c1_g2	537	56.515	11.025	5.085	PREDICTED: uncharacterized protein LOC105048747 isoform X2 [Elaeis guineensis]	------	------	------	------	------	------	------	------	gi|75102992|sp|Q5M750.1|VQ4_ARATH;	RecName: Full=VQ motif-containing protein 4; Short=AtVQ4; AltName: Full=MPK3/6-targeted VQ-motif-containing protein 1;	PF05678.11	VQ	VQ motif
TRINITY_DN43960_c5_g2	6413	3.605	0.825	1.135	PREDICTED: LOW QUALITY PROTEIN: zinc finger CCCH domain-containing protein ZFN-like [Phoenix dactylifera]	GO:0046872;GO:0046872;GO:0046872	MF:metal ion binding;MF:metal ion binding;MF:metal ion binding;	------	------	------	------	------	------	gi|122207693|sp|Q2R4J4.2|C3H63_ORYSJ;	RecName: Full=Zinc finger CCCH domain-containing protein 63; Short=OsC3H63;	PF00642.21;PF16131.2;PF14608.3	zf-CCCH;Torus;zf-CCCH_2	Zinc finger C-x8-C-x5-C-x3-H type;Torus domain;RNA-binding, Nab2-type zinc finger
TRINITY_DN44007_c6_g2	1578	132.845	7.09	4.6	ABC transporter B family member 4-like isoform X1 [Asparagus officinalis]	GO:0016021;GO:0005524;GO:0042626	CC:integral component of membrane;MF:ATP binding;MF:ATPase activity, coupled to transmembrane movement of substances;	K05658	ABCB1, CD243	map02010	ABC transporters	------	------	gi|374095360|sp|Q9M1Q9.2|AB21B_ARATH;	RecName: Full=ABC transporter B family member 21; Short=ABC transporter ABCB.21; Short=AtABCB21; AltName: Full=Multidrug resistance protein 17; AltName: Full=P-glycoprotein 21;	PF00005.24;PF02463.16	ABC_tran;SMC_N	ABC transporter;RecF/RecN/SMC N terminal domain
TRINITY_DN44008_c1_g1	444	59.335	7.425	68.875	PREDICTED: L-type lectin-domain containing receptor kinase IV.1-like [Elaeis guineensis]	------	------	------	------	------	------	------	------	gi|75318718|sp|O80939.1|LRK41_ARATH;	RecName: Full=L-type lectin-domain containing receptor kinase IV.1; Short=Arabidopsis thaliana lectin-receptor kinase e; Short=AthlecRK-e; Short=LecRK-IV.1; AltName: Full=Lectin Receptor Kinase 1; Flags: Precursor;	------	------	------
TRINITY_DN44010_c0_g1	752	111.635	10.225	7.855	PREDICTED: protein PROTON GRADIENT REGULATION 5, chloroplastic [Prunus mume]	GO:0009773;GO:0009644;GO:0009773;GO:0009644	BP:photosynthetic electron transport in photosystem I;BP:response to high light intensity;BP:photosynthetic electron transport in photosystem I;BP:response to high light intensity;	------	------	------	------	------	------	gi|75206595|sp|Q9SL05.1|PGR5_ARATH;	RecName: Full=Protein PROTON GRADIENT REGULATION 5, chloroplastic; Flags: Precursor;	------	------	------
TRINITY_DN44023_c1_g5	2653	6.72	17.62	13.46	BES1/BZR1 like protein 2 [Apostasia shenzhenica]	GO:0009742;GO:0006351;GO:0009742;GO:0006351;GO:0009742;GO:0006351;GO:0003700;GO:0003700;GO:0003700	BP:brassinosteroid mediated signaling pathway;BP:transcription, DNA-templated;BP:brassinosteroid mediated signaling pathway;BP:transcription, DNA-templated;BP:brassinosteroid mediated signaling pathway;BP:transcription, DNA-templated;MF:transcription factor activity, sequence-specific DNA binding;MF:transcription factor activity, sequence-specific DNA binding;MF:transcription factor activity, seq…	K14503	BZR1_2	map04075	Plant hormone signal transduction	------	------	gi|57012618|sp|Q9LN63.1|BZR2_ARATH;	RecName: Full=Protein BRASSINAZOLE-RESISTANT 2; AltName: Full=Protein 107; AltName: Full=Protein BIN2 SUBSTRATE 1; AltName: Full=Protein BRI1-EMS-SUPPRESSOR 1;	PF05687.10	BES1_N	BES1/BZR1 plant transcription factor, N-terminal
TRINITY_DN44070_c0_g2	2252	1.65	7.17	7.165	PREDICTED: dihydroxy-acid dehydratase, chloroplastic [Elaeis guineensis]	GO:0009082;GO:0009082;GO:0009082;GO:0004160;GO:0004160;GO:0004160	BP:branched-chain amino acid biosynthetic process;BP:branched-chain amino acid biosynthetic process;BP:branched-chain amino acid biosynthetic process;MF:dihydroxy-acid dehydratase activity;MF:dihydroxy-acid dehydratase activity;MF:dihydroxy-acid dehydratase activity;	K01687	ilvD	map00770;map00290	Pantothenate and CoA biosynthesis;Valine, leucine and isoleucine biosynthesis	COG0129	E:Amino acid transport and metabolism	gi|75273449|sp|Q9LIR4.1|ILVD_ARATH;	RecName: Full=Dihydroxy-acid dehydratase, chloroplastic; Short=AtDHAD; Short=DAD; Flags: Precursor;	PF00920.18	ILVD_EDD	Dehydratase family
TRINITY_DN44072_c2_g2	2209	0.09	1.565	1.425	DEAD-box ATP-dependent RNA helicase 52C-like [Asparagus officinalis]	GO:0005524;GO:0004386;GO:0003676;GO:0005524;GO:0004386;GO:0003676;GO:0005524;GO:0004386;GO:0003676;GO:0005524;GO:0004386;GO:0003676	MF:ATP binding;MF:helicase activity;MF:nucleic acid binding;MF:ATP binding;MF:helicase activity;MF:nucleic acid binding;MF:ATP binding;MF:helicase activity;MF:nucleic acid binding;MF:ATP binding;MF:helicase activity;MF:nucleic acid binding;	K11594	DDX3X, bel	------	------	------	------	gi|122206897|sp|Q2R1M8.1|RH52C_ORYSJ;	RecName: Full=DEAD-box ATP-dependent RNA helicase 52C;	PF00270.26;PF00271.28	DEAD;Helicase_C	DEAD/DEAH box helicase;Helicase conserved C-terminal domain
TRINITY_DN44126_c4_g2	1132	142.76	13.89	31.505	heptahelical transmembrane protein 4-like [Asparagus officinalis]	GO:0016021	CC:integral component of membrane;	K07297	ADIPOR	------	------	------	------	gi|75213596|sp|Q9SZG0.1|HHP4_ARATH;	RecName: Full=Heptahelical transmembrane protein 4; AltName: Full=PAQR family protein HHP4;	PF03006.17	HlyIII	Haemolysin-III related
TRINITY_DN44180_c3_g2	882	7.63	0.23	0.815	probable WRKY transcription factor 50 [Asparagus officinalis]	GO:0006351;GO:0005634;GO:0003700;GO:0043565	BP:transcription, DNA-templated;CC:nucleus;MF:transcription factor activity, sequence-specific DNA binding;MF:sequence-specific DNA binding;	------	------	------	------	------	------	gi|29839580|sp|Q8VWQ5.1|WRK50_ARATH;	RecName: Full=Probable WRKY transcription factor 50; AltName: Full=WRKY DNA-binding protein 50;	PF03106.12	WRKY	WRKY DNA -binding domain
TRINITY_DN44208_c1_g1	1191	0.305	5.27	4.13		------	------	------	------	------	------	------	------	------	------	------	------	------
TRINITY_DN44210_c0_g1	1797	6.915	1.395	3.035	uncharacterized protein At4g15970-like [Asparagus officinalis]	------	------	------	------	------	------	------	------	gi|68566155|sp|P0C042.1|Y4597_ARATH;	RecName: Full=Uncharacterized protein At4g15970;	PF03407.13	Nucleotid_trans	Nucleotide-diphospho-sugar transferase
TRINITY_DN44261_c2_g1	887	42.43	1.825	9.645	PREDICTED: LEAF RUST 10 DISEASE-RESISTANCE LOCUS RECEPTOR-LIKE PROTEIN KINASE-like 2.3 [Phoenix dactylifera]	GO:0016021;GO:0005524;GO:0030247;GO:0004672	CC:integral component of membrane;MF:ATP binding;MF:polysaccharide binding;MF:protein kinase activity;	------	------	------	------	------	------	gi|1018740231|sp|F4KA50.2|LRL22_ARATH;	RecName: Full=LEAF RUST 10 DISEASE-RESISTANCE LOCUS RECEPTOR-LIKE PROTEIN KINASE-like 2.2; AltName: Full=Probable receptor-like serine/threonine-protein kinase LRK10L-2.2; Flags: Precursor;	PF00069.22;PF07714.14	Pkinase;Pkinase_Tyr	Protein kinase domain;Protein tyrosine kinase
TRINITY_DN44264_c6_g1	862	1.465	0	0.175		------	------	------	------	------	------	------	------	------	------	------	------	------
TRINITY_DN44284_c3_g7	742	0.45	10.605	0.915	putative invertase inhibitor [Asparagus officinalis]	GO:0004857;GO:0004857	MF:enzyme inhibitor activity;MF:enzyme inhibitor activity;	------	------	------	------	------	------	gi|29839547|sp|Q8GT41.1|PLA1_PLAAC;	RecName: Full=Putative invertase inhibitor; AltName: Full=Pollen allergen Pla a 1; AltName: Allergen=Pla a 1; Flags: Precursor;	PF04043.12	PMEI	Plant invertase/pectin methylesterase inhibitor
TRINITY_DN44333_c4_g3	1063	0.08	3.585	0.895	PREDICTED: transcription repressor MYB5-like [Phoenix dactylifera]	GO:0003677;GO:0003677;GO:0003677	MF:DNA binding;MF:DNA binding;MF:DNA binding;	K09422	MYBP	------	------	------	------	gi|75319412|sp|Q38850.1|MYB5_ARATH;	RecName: Full=Transcription repressor MYB5; AltName: Full=AtM2; AltName: Full=Myb-related protein 5; Short=AtMYB5;	PF00249.28;PF13921.3	Myb_DNA-binding;Myb_DNA-bind_6	Myb-like DNA-binding domain;Myb-like DNA-binding domain
TRINITY_DN44342_c2_g1	647	3.515	16.945	3.22		------	------	------	------	------	------	------	------	------	------	------	------	------
TRINITY_DN44367_c2_g1	1172	34.47	2.9	9.515	tryptamine hydroxycinnamoyltransferase 1-like [Dendrobium catenatum]	GO:0047172;GO:0016747;GO:0016747;GO:0016747	MF:shikimate O-hydroxycinnamoyltransferase activity;MF:transferase activity, transferring acyl groups other than amino-acyl groups;MF:transferase activity, transferring acyl groups other than amino-acyl groups;MF:transferase activity, transferring acyl groups other than amino-acyl groups;	------	------	------	------	------	------	gi|322518395|sp|A9ZPJ7.1|AGCT2_HORVU;	RecName: Full=Agmatine coumaroyltransferase-2;	PF02458.12	Transferase	Transferase family
TRINITY_DN44402_c3_g1	5691	19.005	3.295	7.415	PREDICTED: putative ABC transporter C family member 15 [Phoenix dactylifera]	GO:0016021;GO:0005524;GO:0042626	CC:integral component of membrane;MF:ATP binding;MF:ATPase activity, coupled to transmembrane movement of substances;	K05666	ABCC2	map02010	ABC transporters	COG1132	V:Defense mechanisms	gi|75335110|sp|Q9LK64.1|AB3C_ARATH;	RecName: Full=ABC transporter C family member 3; Short=ABC transporter ABCC.3; Short=AtABCC3; AltName: Full=ATP-energized glutathione S-conjugate pump 3; AltName: Full=Glutathione S-conjugate-transporting ATPase 3; AltName: Full=Multidrug resistance-associated protein 3;	PF00664.20;PF00005.24;PF13555.3;PF01926.20;PF01935.14;PF02463.16	ABC_membrane;ABC_tran;AAA_29;MMR_HSR1;DUF87;SMC_N	ABC transporter transmembrane region;ABC transporter;P-loop containing region of AAA domain;50S ribosome-binding GTPase;Domain of unknown function DUF87;RecF/RecN/SMC N terminal domain
TRINITY_DN44411_c4_g2	836	3.99	0.125	2.515	PREDICTED: uncharacterized protein LOC104414155 [Eucalyptus grandis]	------	------	------	------	------	------	------	------	------	------	------	------	------
TRINITY_DN44418_c4_g3	1632	93.645	13.06	10.665	PREDICTED: chitin elicitor-binding protein [Phoenix dactylifera]	------	------	------	------	------	------	------	------	gi|38257899|sp|O23006.1|LYM2_ARATH;	RecName: Full=LysM domain-containing GPI-anchored protein 2; AltName: Full=Chitin elicitor-binding protein LYM2; Short=CEBiP LYM2; Flags: Precursor;	PF01476.17	LysM	LysM domain
TRINITY_DN44421_c11_g2	1137	0	0.915	1.05	PREDICTED: actin-related protein 3 isoform X2 [Oryza sativa Japonica Group]	GO:0034314;GO:0007275;GO:0034314;GO:0005885;GO:0005737;GO:0005885;GO:0003779;GO:0005524;GO:0005524	BP:Arp2/3 complex-mediated actin nucleation;BP:multicellular organism development;BP:Arp2/3 complex-mediated actin nucleation;CC:Arp2/3 protein complex;CC:cytoplasm;CC:Arp2/3 protein complex;MF:actin binding;MF:ATP binding;MF:ATP binding;	K18584	ACTR3, ARP3	------	------	------	------	gi|75291091|sp|Q6K908.1|ARP3_ORYSJ;	RecName: Full=Actin-related protein 3 >gi|190356069|sp|A2X6S3.2|ARP3_ORYSI RecName: Full=Actin-related protein 3;	------	------	------
TRINITY_DN44422_c9_g1	998	3.955	0.39	1.01	probable LRR receptor-like serine/threonine-protein kinase At2g24230 [Dendrobium catenatum]	GO:0016021;GO:0016021;GO:0005524;GO:0004672;GO:0004714	CC:integral component of membrane;CC:integral component of membrane;MF:ATP binding;MF:protein kinase activity;MF:transmembrane receptor protein tyrosine kinase activity;	------	------	------	------	------	------	gi|75330814|sp|Q8RZV7.1|MSP1_ORYSJ;	RecName: Full=Leucine-rich repeat receptor protein kinase MSP1; AltName: Full=Protein MULTIPLE SPOROCYTE 1; Flags: Precursor;	PF13855.3;PF12799.4;PF12768.4;PF15102.3	LRR_8;LRR_4;Rax2;TMEM154	Leucine rich repeat;Leucine Rich repeats;Cortical protein marker for cell polarity;TMEM154 protein family
TRINITY_DN44454_c6_g2	1125	10.375	1.635	3.195	probable LRR receptor-like serine/threonine-protein kinase At3g47570 [Asparagus officinalis]	------	------	------	------	------	------	------	------	gi|75337071|sp|Q9SD62.1|Y3471_ARATH;	RecName: Full=Putative receptor-like protein kinase At3g47110; Flags: Precursor;	PF07714.14	Pkinase_Tyr	Protein tyrosine kinase
TRINITY_DN44460_c2_g1	353	66.24	1.58	5.105		------	------	------	------	------	------	------	------	------	------	------	------	------
TRINITY_DN44464_c1_g1	923	26.075	7.005	10.22	bromodomain-containing protein DDB_G0270170-like isoform X2 [Asparagus officinalis]	------	------	K11723	BRD7_9	------	------	------	------	------	------	------	------	------
TRINITY_DN44466_c0_g3	523	1.27	12.085	9.265	conserved hypothetical protein [Ricinus communis]	------	------	------	------	------	------	------	------	------	------	------	------	------
TRINITY_DN44469_c8_g1	1825	0.03	1.38	0.555		------	------	------	------	------	------	------	------	------	------	------	------	------
TRINITY_DN44483_c2_g1	1296	171.695	21.685	158.96	PREDICTED: probable mediator of RNA polymerase II transcription subunit 37e [Fragaria vesca subsp. vesca]	GO:0005524;GO:0005524;GO:0005524;GO:0005524	MF:ATP binding;MF:ATP binding;MF:ATP binding;MF:ATP binding;	K03283	HSPA1_8	map04144;map04141;map03040	Endocytosis;Protein processing in endoplasmic reticulum;Spliceosome	------	------	gi|123620|sp|P27322.1|HSP72_SOLLC;	RecName: Full=Heat shock cognate 70 kDa protein 2;	PF10712.6;PF00012.17	NAD-GH;HSP70	NAD-specific glutamate dehydrogenase;Hsp70 protein
TRINITY_DN44491_c3_g2	1001	99.405	0.825	7.11	PREDICTED: probable LRR receptor-like serine/threonine-protein kinase At3g47570 [Elaeis guineensis]	------	------	------	------	------	------	------	------	gi|263419078|sp|C0LGT6.1|EFR_ARATH;	RecName: Full=LRR receptor-like serine/threonine-protein kinase EFR; AltName: Full=Elongation factor Tu receptor; Short=EF-Tu receptor; Flags: Precursor;	PF00069.22;PF07714.14;PF01636.20	Pkinase;Pkinase_Tyr;APH	Protein kinase domain;Protein tyrosine kinase;Phosphotransferase enzyme family
TRINITY_DN44507_c7_g1	414	0	12.435	3.005		------	------	------	------	------	------	------	------	------	------	------	------	------
TRINITY_DN44528_c5_g3	908	0.105	2.59	1.59		------	------	------	------	------	------	------	------	------	------	------	------	------
TRINITY_DN44598_c5_g5	730	15.105	0.85	1.075	calcium-dependent protein kinase 18 isoform X1 [Asparagus officinalis]	GO:0005524;GO:0005509;GO:0004672	MF:ATP binding;MF:calcium ion binding;MF:protein kinase activity;	------	------	------	------	------	------	gi|75334005|sp|Q9FKW4.1|CDPKS_ARATH;	RecName: Full=Calcium-dependent protein kinase 28;	------	------	------
TRINITY_DN44617_c3_g1	508	39.905	527.125	63.18		------	------	------	------	------	------	------	------	------	------	------	------	------
TRINITY_DN44639_c0_g9	3217	1.92	0.29	0.155	probable protein phosphatase 2C 15 [Asparagus officinalis]	GO:0004722	MF:protein serine/threonine phosphatase activity;	------	------	------	------	------	------	gi|75191032|sp|Q9M9C6.1|P2C15_ARATH;	RecName: Full=Probable protein phosphatase 2C 15; Short=AtPP2C15;	------	------	------
TRINITY_DN44655_c6_g1	566	1017.43	4424.39	3498.54	hypothetical protein CDL15_Pgr024242 [Punica granatum]	------	------	------	------	------	------	------	------	------	------	------	------	------
TRINITY_DN44738_c1_g3	1153	0	0.94	0.355	PREDICTED: NAC domain-containing protein 21/22 [Musa acuminata subsp. malaccensis]	GO:0006355;GO:0006351;GO:0006355;GO:0006351;GO:0006355;GO:0006351;GO:0005634;GO:0005634;GO:0005634;GO:0003677;GO:0003677;GO:0003677	BP:regulation of transcription, DNA-templated;BP:transcription, DNA-templated;BP:regulation of transcription, DNA-templated;BP:transcription, DNA-templated;BP:regulation of transcription, DNA-templated;BP:transcription, DNA-templated;CC:nucleus;CC:nucleus;CC:nucleus;MF:DNA binding;MF:DNA binding;MF:DNA binding;	------	------	------	------	------	------	gi|51316422|sp|Q84TE6.2|NAC22_ARATH;	RecName: Full=NAC domain-containing protein 21/22; Short=ANAC021/ANAC022;	PF02365.12	NAM	No apical meristem
TRINITY_DN44789_c0_g2	1180	42.985	10.195	15.375	PREDICTED: probable protein phosphatase 2C 26 [Elaeis guineensis]	GO:0004722;GO:0004722	MF:protein serine/threonine phosphatase activity;MF:protein serine/threonine phosphatase activity;	------	------	------	------	------	------	gi|75135808|sp|Q6ZGY0.1|P2C26_ORYSJ;	RecName: Full=Probable protein phosphatase 2C 26; Short=OsPP2C26;	------	------	------
TRINITY_DN44794_c7_g1	1577	0.665	14.86	5.82	PREDICTED: bidirectional sugar transporter SWEET17-like [Gossypium hirsutum]	GO:0008643;GO:0008643;GO:0008643;GO:0008643;GO:0016021;GO:0005886;GO:0016021;GO:0005886;GO:0016021;GO:0005886;GO:0016021;GO:0005886	BP:carbohydrate transport;BP:carbohydrate transport;BP:carbohydrate transport;BP:carbohydrate transport;CC:integral component of membrane;CC:plasma membrane;CC:integral component of membrane;CC:plasma membrane;CC:integral component of membrane;CC:plasma membrane;CC:integral component of membrane;CC:plasma membrane;	K15382	SLC50A, SWEET	------	------	------	------	gi|122236833|sp|Q10LN5.1|SWT16_ORYSJ;	RecName: Full=Bidirectional sugar transporter SWEET16; Short=OsSWEET16;	PF03083.13	MtN3_slv	Sugar efflux transporter for intercellular exchange
TRINITY_DN44801_c3_g1	389	0.2	14.31	5.675		------	------	------	------	------	------	------	------	------	------	------	------	------
TRINITY_DN44807_c2_g4	794	5.055	0.16	0		------	------	------	------	------	------	------	------	------	------	------	------	------
TRINITY_DN44815_c1_g4	972	16.61	1.27	0		------	------	------	------	------	------	------	------	------	------	------	------	------
TRINITY_DN44819_c3_g3	680	1.14	17.115	5.755	putative GATA transcription factor 22 isoform X1 [Asparagus officinalis]	GO:0003700;GO:0043565;GO:0008270;GO:0003700;GO:0043565;GO:0008270	MF:transcription factor activity, sequence-specific DNA binding;MF:sequence-specific DNA binding;MF:zinc ion binding;MF:transcription factor activity, sequence-specific DNA binding;MF:sequence-specific DNA binding;MF:zinc ion binding;	------	------	------	------	------	------	gi|71660811|sp|Q9SZI6.1|GAT22_ARATH;	RecName: Full=Putative GATA transcription factor 22;	PF00320.24	GATA	GATA zinc finger
TRINITY_DN44820_c5_g6	917	0.105	3.28	1.18	hypothetical protein GQ55_7G209800 [Panicum hallii var. hallii]	GO:0005975;GO:0004553	BP:carbohydrate metabolic process;MF:hydrolase activity, hydrolyzing O-glycosyl compounds;	K05350	bglB	map00460;map00940;map00500	Cyanoamino acid metabolism;Phenylpropanoid biosynthesis;Starch and sucrose metabolism	------	------	gi|75296458|sp|Q7XSK0.2|BGL18_ORYSJ;	RecName: Full=Beta-glucosidase 18; Short=Os4bglu18; Flags: Precursor;	------	------	------
TRINITY_DN44831_c1_g1	991	8.175	0.76	2.36	receptor kinase-like protein Xa21 [Asparagus officinalis]	------	------	------	------	------	------	------	------	gi|264664489|sp|C0LGP4.1|Y3475_ARATH;	RecName: Full=Probable LRR receptor-like serine/threonine-protein kinase At3g47570; Flags: Precursor;	PF13855.3;PF12799.4;PF08263.9	LRR_8;LRR_4;LRRNT_2	Leucine rich repeat;Leucine Rich repeats;Leucine rich repeat N-terminal domain
TRINITY_DN44864_c4_g2	941	0.065	3.635	1.37		------	------	------	------	------	------	------	------	------	------	------	------	------
TRINITY_DN44870_c0_g5	2396	14.425	3.32	5.23	PREDICTED: target of Myb protein 1 [Elaeis guineensis]	GO:0006886;GO:0006886;GO:0005622;GO:0005622	BP:intracellular protein transport;BP:intracellular protein transport;CC:intracellular;CC:intracellular;	------	------	------	------	------	------	------	------	PF03127.11	GAT	GAT domain
TRINITY_DN44873_c0_g4	776	6.78	0.775	30.6	7-deoxyloganetin glucosyltransferase-like [Asparagus officinalis]	GO:0008152;GO:0008152;GO:0008152;GO:0016758;GO:0016758;GO:0016758	BP:metabolic process;BP:metabolic process;BP:metabolic process;MF:transferase activity, transferring hexosyl groups;MF:transferase activity, transferring hexosyl groups;MF:transferase activity, transferring hexosyl groups;	K21374	UGT85A	------	------	------	------	gi|678019175|sp|F8WLS6.1|UGT6_CATRO;	RecName: Full=7-deoxyloganetin glucosyltransferase; AltName: Full=Iridoid 1-O-glucosyltransferase; AltName: Full=UDP-glucose glucosyltransferase 6; Short=CrUGT6; AltName: Full=UDP-glycosyltransferase 85A23;	------	------	------
TRINITY_DN44978_c1_g1	549	0.515	14.115	5.605		------	------	------	------	------	------	------	------	------	------	------	------	------
TRINITY_DN44991_c2_g1	1800	2.57	0.04	0.395	PREDICTED: phospholipase A1-Ibeta2, chloroplastic-like [Phoenix dactylifera]	GO:0006629;GO:0006629;GO:0006629;GO:0016787;GO:0016787;GO:0016787	BP:lipid metabolic process;BP:lipid metabolic process;BP:lipid metabolic process;MF:hydrolase activity;MF:hydrolase activity;MF:hydrolase activity;	K16818	DAD1	map00564;map00592	Glycerophospholipid metabolism;alpha-Linolenic acid metabolism	------	------	gi|374095438|sp|O23522.2|PLA14_ARATH;	RecName: Full=Phospholipase A1-Ibeta2, chloroplastic; Flags: Precursor;	PF01764.22	Lipase_3	Lipase
TRINITY_DN45103_c2_g2	2726	8.95	1.57	3.07	PREDICTED: probable LRR receptor-like serine/threonine-protein kinase At2g16250 [Phoenix dactylifera]	GO:0016021;GO:0016021;GO:0016021;GO:0005524;GO:0004672;GO:0005524;GO:0004672;GO:0005524;GO:0004672	CC:integral component of membrane;CC:integral component of membrane;CC:integral component of membrane;MF:ATP binding;MF:protein kinase activity;MF:ATP binding;MF:protein kinase activity;MF:ATP binding;MF:protein kinase activity;	------	------	------	------	------	------	gi|264664473|sp|C0LGK4.1|Y2165_ARATH;	RecName: Full=Probable LRR receptor-like serine/threonine-protein kinase At2g16250; Flags: Precursor;	PF07714.14;PF00069.22;PF13855.3;PF08263.9	Pkinase_Tyr;Pkinase;LRR_8;LRRNT_2	Protein tyrosine kinase;Protein kinase domain;Leucine rich repeat;Leucine rich repeat N-terminal domain
TRINITY_DN45110_c0_g1	804	0.22	7.325	1.67	antifungal protein ginkbilobin-2-like [Asparagus officinalis]	------	------	------	------	------	------	------	------	------	------	PF01657.14	Stress-antifung	Salt stress response/antifungal
TRINITY_DN45117_c3_g1	1692	0	0.675	0.605	hypothetical protein TSUD_331610 [Trifolium subterraneum]	GO:0015074;GO:0003676;GO:0008270	BP:DNA integration;MF:nucleic acid binding;MF:zinc ion binding;	------	------	------	------	------	------	gi|130582|sp|P10978.1|POLX_TOBAC;	RecName: Full=Retrovirus-related Pol polyprotein from transposon TNT 1-94; Includes: RecName: Full=Protease; Includes: RecName: Full=Reverse transcriptase; Includes: RecName: Full=Endonuclease;	------	------	------
TRINITY_DN45130_c3_g3	505	9.17	0.37	2.095	PREDICTED: uncharacterized protein LOC103711772 [Phoenix dactylifera]	------	------	------	------	------	------	------	------	------	------	------	------	------
TRINITY_DN45151_c5_g2	864	1.49	0	0.42	uncharacterized protein LOC109841719 [Asparagus officinalis]	------	------	------	------	------	------	------	------	------	------	------	------	------
TRINITY_DN45171_c3_g5	941	0	1.99	0.42	uncharacterized protein A4U43_C08F33670 [Asparagus officinalis]	------	------	------	------	------	------	------	------	gi|75276320|sp|Q501D5.1|MCMBP_ARATH;	RecName: Full=Mini-chromosome maintenance complex-binding protein; Short=MCM-BP; Short=MCM-binding protein; AltName: Full=Protein E2F TARGET GENE 1;	PF09739.6	MCM_bind	Mini-chromosome maintenance replisome factor
TRINITY_DN45222_c7_g2	1584	2.455	0.015	0.72		------	------	------	------	------	------	------	------	------	------	------	------	------
TRINITY_DN45262_c4_g3	1009	83.33	9.7	10.31	hypothetical protein EUGRSUZ_G03410 [Eucalyptus grandis]	------	------	------	------	------	------	------	------	------	------	PF03107.13;PF07649.9	C1_2;C1_3	C1 domain;C1-like domain
TRINITY_DN45289_c5_g1	1319	5.91	0.23	0.875		------	------	------	------	------	------	------	------	------	------	------	------	------
TRINITY_DN45290_c1_g1	639	2.765	0	1.54		------	------	------	------	------	------	------	------	------	------	------	------	------
TRINITY_DN45356_c3_g1	767	0.045	10.055	81.925	PB1 domain containing protein [Trema orientalis]	------	------	------	------	------	------	------	------	------	------	PF00564.21	PB1	PB1 domain
TRINITY_DN45373_c0_g2	684	13.565	0.655	0.37		------	------	------	------	------	------	------	------	------	------	------	------	------
TRINITY_DN45374_c9_g1	1263	1.43	0.02	0.235	uncharacterized protein LOC109827551 [Asparagus officinalis]	------	------	------	------	------	------	------	------	------	------	PF00078.24	RVT_1	Reverse transcriptase
TRINITY_DN45407_c0_g2	674	0	2.985	2.21		------	------	------	------	------	------	------	------	------	------	------	------	------
TRINITY_DN45420_c1_g3	2681	0.055	23.715	0.735	uncharacterized protein A4U43_C04F17540 [Asparagus officinalis]	GO:0008152;GO:0008152;GO:0000287;GO:0010333;GO:0000287;GO:0010333	BP:metabolic process;BP:metabolic process;MF:magnesium ion binding;MF:terpene synthase activity;MF:magnesium ion binding;MF:terpene synthase activity;	K15803	GERD	map00909	Sesquiterpenoid and triterpenoid biosynthesis	------	------	gi|410591621|sp|B3TPQ6.1|BCUSY_MAGGA;	RecName: Full=Beta-cubebene synthase; Short=Mg25;	PF03936.13	Terpene_synth_C	Terpene synthase family, metal binding domain
TRINITY_DN45483_c3_g3	1265	7.295	0.06	0.27	uncharacterized protein A4U43_C05F3570 [Asparagus officinalis]	------	------	K03283	HSPA1_8	map04144;map04141;map03040	Endocytosis;Protein processing in endoplasmic reticulum;Spliceosome	------	------	gi|123620|sp|P27322.1|HSP72_SOLLC;	RecName: Full=Heat shock cognate 70 kDa protein 2;	PF10712.6	NAD-GH	NAD-specific glutamate dehydrogenase
TRINITY_DN45507_c4_g1	3604	0.355	2.91	2.685	hypothetical protein PAHAL_A03370 [Panicum hallii]	GO:0016021;GO:0016021;GO:0016021;GO:0015079;GO:0015079;GO:0015079	CC:integral component of membrane;CC:integral component of membrane;CC:integral component of membrane;MF:potassium ion transmembrane transporter activity;MF:potassium ion transmembrane transporter activity;MF:potassium ion transmembrane transporter activity;	K03549	kup	------	------	------	------	gi|62900352|sp|Q67VS5.1|HAK10_ORYSJ;	RecName: Full=Potassium transporter 10; AltName: Full=OsHAK10;	------	------	------
TRINITY_DN45511_c0_g2	437	32.605	1.615	5.675	PREDICTED: leucine-rich repeat receptor-like protein kinase PEPR1, partial [Elaeis guineensis]	GO:0016021	CC:integral component of membrane;	------	------	------	------	------	------	gi|259491355|sp|C0LGX3.1|HSL2_ARATH;	RecName: Full=LRR receptor-like serine/threonine-protein kinase HSL2; AltName: Full=Protein HAESA-LIKE2; Flags: Precursor;	PF13855.3;PF12799.4	LRR_8;LRR_4	Leucine rich repeat;Leucine Rich repeats
TRINITY_DN45558_c3_g5	773	0.12	11.88	5.91		------	------	------	------	------	------	------	------	------	------	------	------	------
TRINITY_DN45593_c2_g8	819	5.905	0.115	0.34		------	------	------	------	------	------	------	------	------	------	------	------	------
TRINITY_DN45603_c4_g1	1342	10.945	3.44	5.32	PREDICTED: dnaJ homolog subfamily C GRV2-like, partial [Elaeis guineensis]	------	------	K09533	DNAJC13	------	------	------	------	gi|449061825|sp|F4IVL6.1|GRV2_ARATH;	RecName: Full=DnaJ homolog subfamily C GRV2; AltName: Full=Protein GRAVITROPISM DEFECTIVE 2; AltName: Full=Protein GREEN FLUORESCENT SEED 2; AltName: Full=Protein KATAMARI2;	------	------	------
TRINITY_DN45615_c1_g2	1035	0.03	1.915	0.41		------	------	------	------	------	------	------	------	------	------	------	------	------
TRINITY_DN45620_c3_g9	622	10.63	61.42	41.33		------	------	------	------	------	------	------	------	------	------	PF00403.23	HMA	Heavy-metal-associated domain
TRINITY_DN45637_c2_g2	743	3.48	44.005	10.525		------	------	------	------	------	------	------	------	------	------	------	------	------
TRINITY_DN45641_c0_g1	1074	551.665	5.98	25.81		------	------	------	------	------	------	------	------	------	------	------	------	------
TRINITY_DN45652_c8_g1	1476	150.38	36.48	104.6	protein SYM1-like [Asparagus officinalis]	GO:0016021;GO:0016021;GO:0016021	CC:integral component of membrane;CC:integral component of membrane;CC:integral component of membrane;	K13348	MPV17	map04146	Peroxisome	------	------	gi|74604185|sp|Q6CAW5.1|SYM1_YARLI;	RecName: Full=Protein SYM1;	PF04117.9	Mpv17_PMP22	Mpv17 / PMP22 family
TRINITY_DN45675_c5_g7	1090	0	3.175	7.9		------	------	------	------	------	------	------	------	------	------	------	------	------
TRINITY_DN45680_c5_g1	1000	2.695	51.255	40.535		------	------	------	------	------	------	------	------	------	------	------	------	------
TRINITY_DN45680_c7_g2	1091	2.39	0.1	0	PREDICTED: uncharacterized protein LOC109217568 [Nicotiana attenuata]	GO:0015074;GO:0015074;GO:0003676;GO:0008270;GO:0016787;GO:0003676	BP:DNA integration;BP:DNA integration;MF:nucleic acid binding;MF:zinc ion binding;MF:hydrolase activity;MF:nucleic acid binding;	K05674;K20477	RGP1;ABCC10	map02010	ABC transporters	------	------	gi|130582|sp|P10978.1|POLX_TOBAC;	RecName: Full=Retrovirus-related Pol polyprotein from transposon TNT 1-94; Includes: RecName: Full=Protease; Includes: RecName: Full=Reverse transcriptase; Includes: RecName: Full=Endonuclease;	------	------	------
TRINITY_DN45683_c3_g2	1959	0.515	8.655	2.025	Premnaspirodiene oxygenase [Ananas comosus]	GO:0020037;GO:0005506;GO:0004497;GO:0016705;GO:0020037;GO:0005506;GO:0004497;GO:0016705;GO:0020037;GO:0005506;GO:0004497;GO:0016705	MF:heme binding;MF:iron ion binding;MF:monooxygenase activity;MF:oxidoreductase activity, acting on paired donors, with incorporation or reduction of molecular oxygen;MF:heme binding;MF:iron ion binding;MF:monooxygenase activity;MF:oxidoreductase activity, acting on paired donors, with incorporation or reduction of molecular oxygen;MF:heme binding;MF:iron ion binding;MF:monooxygenase activity;MF:…	------	------	------	------	------	------	gi|5915836|sp|P93531.1|C71D7_SOLCH;	RecName: Full=Cytochrome P450 71D7 [Solanum chacoense];	PF00067.19	p450	Cytochrome P450
TRINITY_DN45705_c2_g1	870	0	4.37	2.09		------	------	------	------	------	------	------	------	------	------	------	------	------
TRINITY_DN45707_c8_g1	2306	35.115	2.12	0.6	Protein plant cadmium resistance 8 [Apostasia shenzhenica]	GO:0016021;GO:0016021	CC:integral component of membrane;CC:integral component of membrane;	------	------	------	------	------	------	gi|75186213|sp|Q9M815.2|PCR8_ARATH;	RecName: Full=Protein PLANT CADMIUM RESISTANCE 8; Short=AtPCR8;	PF04749.14	PLAC8	PLAC8 family
TRINITY_DN45753_c2_g4	1634	25.365	5.115	11.635	uncharacterized protein LOC109847443 [Asparagus officinalis]	GO:0016021;GO:0016021	CC:integral component of membrane;CC:integral component of membrane;	------	------	------	------	------	------	------	------	------	------	------
TRINITY_DN45763_c4_g2	774	0	1.835	1.44		------	------	------	------	------	------	------	------	------	------	------	------	------
TRINITY_DN45763_c5_g1	1081	2.61	0	1.255	tropinone reductase homolog At5g06060-like [Asparagus officinalis]	------	------	K08081	TR1	map00960	Tropane, piperidine and pyridine alkaloid biosynthesis	COG1028;COG1028	Q:Secondary metabolites biosynthesis, transport and catabolism;I:Lipid transport and metabolism	gi|75315961|sp|Q9ZW18.1|SAG13_ARATH;	RecName: Full=Senescence-associated protein 13; AltName: Full=Tropinone reductase homolog SAG13;	PF13561.3;PF00106.22;PF08659.7	adh_short_C2;adh_short;KR	Enoyl;short chain dehydrogenase;KR domain
TRINITY_DN45786_c8_g3	828	5.85	0.15	2.14		------	------	------	------	------	------	------	------	------	------	------	------	------
TRINITY_DN45859_c4_g3	1486	0.345	2.485	0.805		------	------	------	------	------	------	------	------	------	------	------	------	------
TRINITY_DN45873_c2_g4	3908	1.25	0.03	0.105	uncharacterized protein LOC109841800 [Asparagus officinalis]	------	------	------	------	------	------	------	------	gi|126296|sp|P08548.1|LIN1_NYCCO;	RecName: Full=LINE-1 reverse transcriptase homolog;	PF00078.24	RVT_1	Reverse transcriptase
TRINITY_DN45985_c3_g1	570	18.515	0	6.55		------	------	------	------	------	------	------	------	------	------	------	------	------
TRINITY_DN45986_c6_g10	832	0	13.39	5.165		------	------	------	------	------	------	------	------	------	------	------	------	------
TRINITY_DN45996_c1_g3	1663	5.13	0	3.445	PREDICTED: protease Do-like 10, mitochondrial [Musa acuminata subsp. malaccensis]	GO:0004252;GO:0004252;GO:0004252	MF:serine-type endopeptidase activity;MF:serine-type endopeptidase activity;MF:serine-type endopeptidase activity;	------	------	------	------	------	------	gi|75262529|sp|Q9FIV6.1|DGP10_ARATH;	RecName: Full=Protease Do-like 10, mitochondrial; Flags: Precursor;	------	------	------
TRINITY_DN46012_c4_g5	396	273.55	16.52	13.46	PREDICTED: calcium-dependent protein kinase 28-like [Nelumbo nucifera]	GO:0009738;GO:0035556;GO:0018105;GO:0046777;GO:0005737;GO:0005634;GO:0005886;GO:0005524;GO:0005509;GO:0004672;GO:0005524;GO:0005509;GO:0004672;GO:0005524;GO:0005509;GO:0009931;GO:0005516;GO:0004683	BP:abscisic acid-activated signaling pathway;BP:intracellular signal transduction;BP:peptidyl-serine phosphorylation;BP:protein autophosphorylation;CC:cytoplasm;CC:nucleus;CC:plasma membrane;MF:ATP binding;MF:calcium ion binding;MF:protein kinase activity;MF:ATP binding;MF:calcium ion binding;MF:protein kinase activity;MF:ATP binding;MF:calcium ion binding;MF:calcium-dependent protein serine/thre…	K13412	CPK	map04626	Plant-pathogen interaction	------	------	gi|75334005|sp|Q9FKW4.1|CDPKS_ARATH;	RecName: Full=Calcium-dependent protein kinase 28;	PF00036.29;PF13202.3;PF13499.3;PF13405.3;PF13833.3	EF-hand_1;EF-hand_5;EF-hand_7;EF-hand_6;EF-hand_8	EF hand;EF hand;EF-hand domain pair;EF-hand domain;EF-hand domain pair
TRINITY_DN46038_c0_g4	670	142.055	33.76	174.675	Ribosomal protein L31e [Macleaya cordata]	GO:0006412;GO:0005840;GO:0003735	BP:translation;CC:ribosome;MF:structural constituent of ribosome;	K02910	RP-L31e, RPL31	map03010	Ribosome	COG2097	J:Translation, ribosomal structure and biogenesis	gi|14423898|sp|Q9M573.1|RL31_PERFR;	RecName: Full=60S ribosomal protein L31;	PF01198.16	Ribosomal_L31e	Ribosomal protein L31e
TRINITY_DN46065_c2_g1	733	11.055	0.64	0.28	PREDICTED: purple acid phosphatase 15-like [Elaeis guineensis]	GO:0016021;GO:0003993;GO:0046872;GO:0003993;GO:0046872;GO:0003993;GO:0046872	CC:integral component of membrane;MF:acid phosphatase activity;MF:metal ion binding;MF:acid phosphatase activity;MF:metal ion binding;MF:acid phosphatase activity;MF:metal ion binding;	------	------	------	------	------	------	gi|75265794|sp|Q9SFU3.1|PPA15_ARATH;	RecName: Full=Purple acid phosphatase 15; AltName: Full=Phytase; Flags: Precursor;	PF16656.2	Pur_ac_phosph_N	Purple acid Phosphatase, N-terminal domain
TRINITY_DN46096_c14_g1	2034	14.29	2.395	4.895	7-deoxyloganetic acid glucosyltransferase-like [Asparagus officinalis]	GO:0008152;GO:0016758	BP:metabolic process;MF:transferase activity, transferring hexosyl groups;	K21373	UGT8, UGT709C2	------	------	------	------	gi|678019183|sp|U3U992.1|UGT8_CATRO;	RecName: Full=7-deoxyloganetic acid glucosyltransferase; AltName: Full=UDP-glucose glucosyltransferase 8; Short=CrUGT8; AltName: Full=UDP-glycosyltransferase 709C2;	PF00201.15	UDPGT	UDP-glucoronosyl and UDP-glucosyl transferase
TRINITY_DN46145_c2_g1	447	45.06	6.865	10.625		------	------	------	------	------	------	------	------	------	------	------	------	------
TRINITY_DN46201_c15_g1	798	47.445	1.05	1.97	PREDICTED: ethylene-responsive transcription factor 1B-like [Phoenix dactylifera]	GO:0006351;GO:0006351;GO:0006351;GO:0006351;GO:0005634;GO:0005634;GO:0005634;GO:0005634;GO:0003677;GO:0003700;GO:0003677;GO:0003700;GO:0003677;GO:0003700;GO:0003677;GO:0003700	BP:transcription, DNA-templated;BP:transcription, DNA-templated;BP:transcription, DNA-templated;BP:transcription, DNA-templated;CC:nucleus;CC:nucleus;CC:nucleus;CC:nucleus;MF:DNA binding;MF:transcription factor activity, sequence-specific DNA binding;MF:DNA binding;MF:transcription factor activity, sequence-specific DNA binding;MF:DNA binding;MF:transcription factor activity, sequence-specific DN…	K14516	ERF1	map04016;map04075	MAPK signaling pathway - plant;Plant hormone signal transduction	------	------	gi|57012702|sp|Q8LDC8.2|ERF92_ARATH;	RecName: Full=Ethylene-responsive transcription factor 1B; Short=AtERF1B; AltName: Full=Ethylene-responsive element-binding factor 1B; Short=EREBP-1B;	PF00847.17	AP2	AP2 domain
TRINITY_DN46207_c1_g1	642	22.83	9.43	17.755	hypothetical protein M569_15680, partial [Genlisea aurea]	GO:0016021;GO:0022857	CC:integral component of membrane;MF:transmembrane transporter activity;	------	------	------	------	------	------	gi|75311177|sp|Q9LHN7.1|PHSC_ARATH;	RecName: Full=Probable polyamine transporter At3g13620;	PF13520.3;PF00324.18	AA_permease_2;AA_permease	Amino acid permease;Amino acid permease
TRINITY_DN46207_c2_g1	1027	50.155	8.07	32.29	uncharacterized protein A4U43_C08F9290 [Asparagus officinalis]	GO:0016021;GO:0022857	CC:integral component of membrane;MF:transmembrane transporter activity;	------	------	------	------	------	------	gi|75311177|sp|Q9LHN7.1|PHSC_ARATH;	RecName: Full=Probable polyamine transporter At3g13620;	PF13520.3;PF00324.18	AA_permease_2;AA_permease	Amino acid permease;Amino acid permease
TRINITY_DN46274_c2_g1	834	0.395	3.855	0.965		------	------	------	------	------	------	------	------	------	------	------	------	------
TRINITY_DN46288_c3_g4	944	0.03	2.855	0.345		------	------	------	------	------	------	------	------	------	------	------	------	------
TRINITY_DN46294_c6_g3	1160	0.52	3.345	3.52		------	------	------	------	------	------	------	------	------	------	------	------	------
TRINITY_DN46298_c1_g4	1053	212.28	34.86	37.915	uncharacterized protein A4U43_C07F23720 [Asparagus officinalis]	GO:0048046;GO:0048046	CC:apoplast;CC:apoplast;	------	------	------	------	------	------	------	------	PF03018.11	Dirigent	Dirigent-like protein
TRINITY_DN46314_c6_g1	937	1.57	0	1.43	uncharacterized protein LOC109830253 [Asparagus officinalis]	------	------	------	------	------	------	------	------	------	------	PF04720.9	PDDEXK_6	PDDEXK-like family of unknown function
TRINITY_DN46314_c6_g2	430	0	5.55	3.4		------	------	------	------	------	------	------	------	------	------	------	------	------
TRINITY_DN46336_c0_g1	2047	7.45	40.505	38.89	uncharacterized protein LOC109849767 [Asparagus officinalis]	------	------	------	------	------	------	------	------	------	------	------	------	------
TRINITY_DN46343_c10_g1	550	24.95	0.305	3.5	12-oxophytodienoate reductase 1-like [Ananas comosus]	GO:0010181;GO:0016491;GO:0010181;GO:0016491	MF:FMN binding;MF:oxidoreductase activity;MF:FMN binding;MF:oxidoreductase activity;	K05894	OPR	map00592	alpha-Linolenic acid metabolism	------	------	gi|122222554|sp|Q0JMR0.1|OPR10_ORYSJ;	RecName: Full=Putative 12-oxophytodienoate reductase 10; AltName: Full=OPDA-reductase 10; Short=OsOPR10;	------	------	------
TRINITY_DN46344_c7_g3	727	0.205	9.485	1.125		------	------	------	------	------	------	------	------	------	------	------	------	------
TRINITY_DN46347_c7_g1	398	8.615	0	0		------	------	------	------	------	------	------	------	------	------	------	------	------
TRINITY_DN46376_c2_g1	1305	0	0.91	0.58		------	------	------	------	------	------	------	------	------	------	------	------	------
TRINITY_DN46390_c3_g1	880	5.54	0.145	1.63	PREDICTED: protein TIFY 10a [Phoenix dactylifera]	------	------	K13464	JAZ	map04075	Plant hormone signal transduction	------	------	gi|75147844|sp|Q84R94.1|TI10A_ORYSJ;	RecName: Full=Protein TIFY 10a; Short=OsTIFY10a; AltName: Full=Jasmonate ZIM domain-containing protein 6; Short=OsJAZ6; AltName: Full=OsJAZ5;	PF06200.11	tify	tify domain
TRINITY_DN46469_c5_g2	774	15.065	1.23	0.555		------	------	------	------	------	------	------	------	------	------	------	------	------
TRINITY_DN46485_c1_g1	421	157.23	3.645	8.995	Ca2+/calmodulin-dependent protein kinase, EF-Hand protein superfamily [Handroanthus impetiginosus]	GO:0005524;GO:0005509;GO:0004672;GO:0005524;GO:0005509;GO:0004672;GO:0005524;GO:0005509;GO:0004672;GO:0005524;GO:0005509;GO:0004672	MF:ATP binding;MF:calcium ion binding;MF:protein kinase activity;MF:ATP binding;MF:calcium ion binding;MF:protein kinase activity;MF:ATP binding;MF:calcium ion binding;MF:protein kinase activity;MF:ATP binding;MF:calcium ion binding;MF:protein kinase activity;	K13412	CPK	map04626	Plant-pathogen interaction	------	------	gi|75327228|sp|Q7XJR9.1|CDPKG_ARATH;	RecName: Full=Calcium-dependent protein kinase 16;	PF00069.22	Pkinase	Protein kinase domain
TRINITY_DN46489_c3_g1	889	5.845	0	5.035		------	------	------	------	------	------	------	------	------	------	------	------	------
TRINITY_DN46504_c5_g1	692	0.135	5.245	65.83	PREDICTED: probable metal-nicotianamine transporter YSL12 isoform X1 [Phoenix dactylifera]	GO:0055085;GO:0055085;GO:0016021;GO:0016021	BP:transmembrane transport;BP:transmembrane transport;CC:integral component of membrane;CC:integral component of membrane;	------	------	------	------	------	------	gi|224493430|sp|Q0J932.2|YSL10_ORYSJ;	RecName: Full=Probable metal-nicotianamine transporter YSL10; AltName: Full=Protein YELLOW STRIPE LIKE 10; Short=OsYSL10;	PF03169.12	OPT	OPT oligopeptide transporter protein
TRINITY_DN46506_c7_g1	2084	111.53	15.865	7.48	PREDICTED: protein NRT1/ PTR FAMILY 6.4 [Phoenix dactylifera]	GO:0016021;GO:0016021;GO:0022857;GO:0022857	CC:integral component of membrane;CC:integral component of membrane;MF:transmembrane transporter activity;MF:transmembrane transporter activity;	------	------	------	------	------	------	gi|75274347|sp|Q9LVE0.1|PTR33_ARATH;	RecName: Full=Protein NRT1/ PTR FAMILY 6.4; Short=AtNPF6.4; AltName: Full=Nitrate transporter 1.3;	PF00854.18;PF07690.13	PTR2;MFS_1	POT family;Major Facilitator Superfamily
TRINITY_DN46510_c7_g1	533	0	7.45	0.17		------	------	------	------	------	------	------	------	------	------	------	------	------
TRINITY_DN46553_c7_g1	2224	3.08	0.09	0.065		------	------	------	------	------	------	------	------	------	------	------	------	------
TRINITY_DN46580_c3_g2	547	0.54	14.225	1.805	hypothetical protein MIMGU_mgv1a018691mg [Erythranthe guttata]	GO:0016021	CC:integral component of membrane;	------	------	------	------	------	------	gi|75184387|sp|Q9M4H4.1|GRI22_VITVI;	RecName: Full=Ripening-related protein grip22; Flags: Precursor;	------	------	------
TRINITY_DN46586_c3_g2	1507	5.97	0.295	0.585	UDP-glycosyltransferase 91C1-like [Asparagus officinalis]	GO:0008152;GO:0016758	BP:metabolic process;MF:transferase activity, transferring hexosyl groups;	------	------	------	------	------	------	gi|75264223|sp|Q9LTA3.1|U91C1_ARATH;	RecName: Full=UDP-glycosyltransferase 91C1;	PF00201.15	UDPGT	UDP-glucoronosyl and UDP-glucosyl transferase
TRINITY_DN46618_c7_g1	2132	0.025	0.91	0.32		------	------	------	------	------	------	------	------	------	------	------	------	------
TRINITY_DN46623_c1_g2	515	48.985	1.145	3.705	12-oxophytodienoate reductase 1 [Lilium regale]	GO:0010181;GO:0016491;GO:0010181;GO:0016491	MF:FMN binding;MF:oxidoreductase activity;MF:FMN binding;MF:oxidoreductase activity;	K05894	OPR	map00592	alpha-Linolenic acid metabolism	COG1902	C:Energy production and conversion	gi|338818374|sp|B9FSC8.1|OPR11_ORYSJ;	RecName: Full=Putative 12-oxophytodienoate reductase 11; AltName: Full=OPDA-reductase 11; Short=OsOPR11;	PF00724.17	Oxidored_FMN	NAD
TRINITY_DN46623_c1_g4	1188	4.175	0.265	2.925	putative 12-oxophytodienoate reductase 5 [Asparagus officinalis]	GO:0010181;GO:0016491	MF:FMN binding;MF:oxidoreductase activity;	K05894	OPR	map00592	alpha-Linolenic acid metabolism	COG1902	C:Energy production and conversion	gi|75147703|sp|Q84QK0.1|OPR1_ORYSJ;	RecName: Full=12-oxophytodienoate reductase 1; AltName: Full=12-oxophytodienoate-10,11-reductase 1; Short=OPDA-reductase 1; Short=OsOPR1;	PF00724.17	Oxidored_FMN	NAD
TRINITY_DN46624_c2_g6	639	1.035	11.005	5.805	proline-rich receptor-like protein kinase PERK1 [Asparagus officinalis]	------	------	------	------	------	------	------	------	------	------	------	------	------
TRINITY_DN46645_c4_g1	1919	0	3.015	2.485		------	------	------	------	------	------	------	------	------	------	------	------	------
TRINITY_DN46661_c3_g1	1470	3.715	0.265	0.275		------	------	------	------	------	------	------	------	------	------	------	------	------
TRINITY_DN46665_c3_g3	687	0	2.55	0.4		------	------	------	------	------	------	------	------	------	------	------	------	------
TRINITY_DN46696_c7_g6	850	6.91	0.32	1.705		------	------	------	------	------	------	------	------	------	------	------	------	------
TRINITY_DN46697_c0_g4	614	0	5.125	0.705	PREDICTED: chaperone protein dnaJ 20, chloroplastic-like [Phoenix dactylifera]	------	------	------	------	------	------	------	------	gi|66774120|sp|Q9SDN0.2|DNJ20_ARATH;	RecName: Full=Chaperone protein dnaJ 20, chloroplastic; Short=AtDjC20; Short=AtJ20; Flags: Precursor;	PF00226.28	DnaJ	DnaJ domain
TRINITY_DN46699_c4_g1	888	0	1.36	0		------	------	------	------	------	------	------	------	------	------	------	------	------
TRINITY_DN46730_c4_g4	1033	2.215	10.335	5.145	PREDICTED: uncharacterized protein LOC105034036 [Elaeis guineensis]	------	------	------	------	------	------	------	------	------	------	PF12552.5	DUF3741	Protein of unknown function
TRINITY_DN46831_c4_g1	916	4.44	30.06	84.335	uncharacterized J domain-containing protein C3E7.11c-like isoform X2 [Asparagus officinalis]	------	------	------	------	------	------	------	------	gi|21759482|sp|P00210.3|FER1_DESAF;	RecName: Full=Ferredoxin-1; AltName: Full=Ferredoxin I; Short=FdI;	PF13370.3;PF13459.3;PF00037.24	Fer4_13;Fer4_15;Fer4	4Fe-4S single cluster domain of Ferredoxin I;4Fe-4S single cluster domain;4Fe-4S binding domain
TRINITY_DN46853_c0_g1	523	18.9	1.44	3.715	LOW QUALITY PROTEIN: probable LRR receptor-like serine/threonine-protein kinase At3g47570 [Ananas comosus]	GO:0016021;GO:0005524;GO:0004674	CC:integral component of membrane;MF:ATP binding;MF:protein serine/threonine kinase activity;	K04733	IRAK4	------	------	------	------	gi|263419078|sp|C0LGT6.1|EFR_ARATH;	RecName: Full=LRR receptor-like serine/threonine-protein kinase EFR; AltName: Full=Elongation factor Tu receptor; Short=EF-Tu receptor; Flags: Precursor;	PF13855.3;PF12799.4;PF08263.9	LRR_8;LRR_4;LRRNT_2	Leucine rich repeat;Leucine Rich repeats;Leucine rich repeat N-terminal domain
TRINITY_DN46869_c5_g3	2193	2.08	0.08	0.14		------	------	------	------	------	------	------	------	------	------	------	------	------
TRINITY_DN46870_c4_g1	443	69.625	7.31	52.6	hypothetical protein AQUCO_00400764v1 [Aquilegia coerulea]	GO:0016021;GO:0016021;GO:0016021;GO:0016021;GO:0005524;GO:0004674;GO:0032440;GO:0005524;GO:0004672;GO:0005524;GO:0004674;GO:0005524;GO:0004674	CC:integral component of membrane;CC:integral component of membrane;CC:integral component of membrane;CC:integral component of membrane;MF:ATP binding;MF:protein serine/threonine kinase activity;MF:2-alkenal reductase [NA;MF:ATP binding;MF:protein kinase activity;MF:ATP binding;MF:protein serine/threonine kinase activity;MF:ATP binding;MF:protein serine/threonine kinase activity;	K04730	IRAK1	------	------	------	------	gi|264664489|sp|C0LGP4.1|Y3475_ARATH;	RecName: Full=Probable LRR receptor-like serine/threonine-protein kinase At3g47570; Flags: Precursor;	------	------	------
TRINITY_DN46895_c4_g2	788	0.36	7.04	7.72	PREDICTED: probable calcium-binding protein CML49 [Phoenix dactylifera]	GO:0005509;GO:0005509	MF:calcium ion binding;MF:calcium ion binding;	K13448	CML	map04626	Plant-pathogen interaction	------	------	gi|75331395|sp|Q8W4L0.1|CML49_ARATH;	RecName: Full=Probable calcium-binding protein CML49; AltName: Full=Calmodulin-like protein 49;	PF00036.29;PF13405.3;PF13202.3;PF13499.3	EF-hand_1;EF-hand_6;EF-hand_5;EF-hand_7	EF hand;EF-hand domain;EF hand;EF-hand domain pair
TRINITY_DN46943_c0_g1	1298	2.745	0	3.4	apoptosis-inducing factor homolog B-like [Asparagus officinalis]	GO:0016491;GO:0016491	MF:oxidoreductase activity;MF:oxidoreductase activity;	------	------	------	------	COG0446	C:Energy production and conversion	gi|74996854|sp|Q54NS9.1|AIFA_DICDI;	RecName: Full=Apoptosis-inducing factor homolog A;	PF07992.11;PF00070.24;PF13434.3;PF13738.3	Pyr_redox_2;Pyr_redox;K_oxygenase;Pyr_redox_3	Pyridine nucleotide-disulphide oxidoreductase;Pyridine nucleotide-disulphide oxidoreductase;L-lysine 6-monooxygenase;Pyridine nucleotide-disulphide oxidoreductase
TRINITY_DN46946_c9_g2	1749	0	1.22	0.105	uncharacterized protein A4U43_C01F12400 [Asparagus officinalis]	------	------	------	------	------	------	------	------	gi|75319885|sp|Q50EK3.1|C04C1_PINTA;	RecName: Full=Cytochrome P450 704C1; AltName: Full=Cytochrome P450 CYPD [Pinus taeda];	PF00067.19	p450	Cytochrome P450
TRINITY_DN46965_c2_g3	1674	29.475	3.625	6.31	aspartic proteinase nepenthesin-1-like [Ananas comosus]	GO:0004190;GO:0004190	MF:aspartic-type endopeptidase activity;MF:aspartic-type endopeptidase activity;	------	------	------	------	------	------	gi|61214233|sp|Q766C3.1|NEP1_NEPGR;	RecName: Full=Aspartic proteinase nepenthesin-1; AltName: Full=Nepenthesin-I; Flags: Precursor;	PF14543.3;PF14541.3;PF00026.20	TAXi_N;TAXi_C;Asp	Xylanase inhibitor N-terminal;Xylanase inhibitor C-terminal;Eukaryotic aspartyl protease
TRINITY_DN46995_c1_g3	733	3.045	15.04	3.975	PREDICTED: 36.4 kDa proline-rich protein, partial [Cucumis melo]	------	------	------	------	------	------	------	------	gi|1709767|sp|Q00451.1|PRF1_SOLLC;	RecName: Full=36.4 kDa proline-rich protein;	PF14547.3;PF00234.19	Hydrophob_seed;Tryp_alpha_amyl	Hydrophobic seed protein;Protease inhibitor/seed storage/LTP family
TRINITY_DN46998_c4_g2	784	0.045	3.66	2.025		------	------	------	------	------	------	------	------	------	------	------	------	------
TRINITY_DN47001_c5_g8	1168	0.89	0	0.115		------	------	------	------	------	------	------	------	------	------	------	------	------
TRINITY_DN47012_c5_g4	3331	1.175	0.09	1.875	protein NLP1-like [Asparagus officinalis]	GO:0006355;GO:0006351;GO:0005634;GO:0003677	BP:regulation of transcription, DNA-templated;BP:transcription, DNA-templated;CC:nucleus;MF:DNA binding;	------	------	------	------	------	------	gi|313471347|sp|Q10S83.1|NLP1_ORYSJ;	RecName: Full=Protein NLP1; Short=OsNLP1; AltName: Full=NIN-like protein 1; AltName: Full=Nodule inception protein-like protein 1;	PF02042.12;PF00564.21	RWP-RK;PB1	RWP-RK domain;PB1 domain
TRINITY_DN47031_c7_g1	782	0	3.19	5.13	PREDICTED: auxin response factor 23-like isoform X2 [Phoenix dactylifera]	GO:0009734;GO:0006355;GO:0006351;GO:0009734;GO:0006355;GO:0006351;GO:0009734;GO:0006355;GO:0006351;GO:0009734;GO:0006355;GO:0006351;GO:0005634;GO:0005634;GO:0005634;GO:0005634;GO:0003677;GO:0003677;GO:0003677;GO:0003677	BP:auxin-activated signaling pathway;BP:regulation of transcription, DNA-templated;BP:transcription, DNA-templated;BP:auxin-activated signaling pathway;BP:regulation of transcription, DNA-templated;BP:transcription, DNA-templated;BP:auxin-activated signaling pathway;BP:regulation of transcription, DNA-templated;BP:transcription, DNA-templated;BP:auxin-activated signaling pathway;BP:regulation of …	------	------	------	------	------	------	gi|122207373|sp|Q2R3F5.2|ARFW_ORYSJ;	RecName: Full=Auxin response factor 23; AltName: Full=OsARF1;	------	------	------
TRINITY_DN47098_c5_g5	653	0.24	5.995	2.705		------	------	------	------	------	------	------	------	------	------	------	------	------
TRINITY_DN47098_c5_g9	513	0.49	7.365	1.89		------	------	------	------	------	------	------	------	------	------	------	------	------
TRINITY_DN47112_c6_g3	2480	21.355	5.565	8.295	HIPL1 protein-like [Asparagus officinalis]	GO:0003824;GO:0003824	MF:catalytic activity;MF:catalytic activity;	------	------	------	------	COG2133	G:Carbohydrate transport and metabolism	gi|34395733|sp|Q9SSG3.2|HIPL1_ARATH;	RecName: Full=HIPL1 protein; Flags: Precursor;	PF07995.8;PF03024.11	GSDH;Folate_rec	Glucose / Sorbosone dehydrogenase;Folate receptor family
TRINITY_DN47118_c1_g4	1208	40.93	7.25	11.285	PREDICTED: stromal 70 kDa heat shock-related protein, chloroplastic-like [Musa acuminata subsp. malaccensis]	GO:0006457;GO:0005524;GO:0051082	BP:protein folding;MF:ATP binding;MF:unfolded protein binding;	K03283	HSPA1_8	map04144;map04141;map03040	Endocytosis;Protein processing in endoplasmic reticulum;Spliceosome	COG0443	O:Posttranslational modification, protein turnover, chaperones	gi|399942|sp|Q02028.1|HSP7S_PEA;	RecName: Full=Stromal 70 kDa heat shock-related protein, chloroplastic; Flags: Precursor;	PF00012.17;PF06723.10	HSP70;MreB_Mbl	Hsp70 protein;MreB/Mbl protein
TRINITY_DN47135_c0_g1	1879	0	2.64	1.865	Reverse transcriptase zinc-binding domain [Macleaya cordata]	GO:0003676;GO:0003964;GO:0003676;GO:0003964;GO:0003676;GO:0003964;GO:0003676;GO:0003964;GO:0003676;GO:0003964	MF:nucleic acid binding;MF:RNA-directed DNA polymerase activity;MF:nucleic acid binding;MF:RNA-directed DNA polymerase activity;MF:nucleic acid binding;MF:RNA-directed DNA polymerase activity;MF:nucleic acid binding;MF:RNA-directed DNA polymerase activity;MF:nucleic acid binding;MF:RNA-directed DNA polymerase activity;	------	------	------	------	------	------	gi|125987635|sp|P0C2F6.1|RNHX1_ARATH;	RecName: Full=Putative ribonuclease H protein At1g65750;	PF13966.3	zf-RVT	zinc-binding in reverse transcriptase
TRINITY_DN47149_c2_g1	1363	1.85	0.135	0.28		------	------	------	------	------	------	------	------	------	------	------	------	------
TRINITY_DN47164_c7_g1	554	0	3.095	0.96		------	------	------	------	------	------	------	------	------	------	------	------	------
TRINITY_DN47167_c2_g1	4261	35.83	8.575	9.095	PREDICTED: serine/threonine-protein phosphatase PP1 [Phoenix dactylifera]	GO:0046872;GO:0004721	MF:metal ion binding;MF:phosphoprotein phosphatase activity;	K06269	PPP1C	map03015	mRNA surveillance pathway	------	------	gi|1346765|sp|P48490.1|PP1_PHAVU;	RecName: Full=Serine/threonine-protein phosphatase PP1;	PF00149.25	Metallophos	Calcineurin-like phosphoesterase
TRINITY_DN47167_c2_g2	4804	1.845	0.25	0.32	PREDICTED: serine/threonine-protein phosphatase PP1 [Elaeis guineensis]	GO:0046872;GO:0004721;GO:0046872;GO:0004721;GO:0046872;GO:0004721	MF:metal ion binding;MF:phosphoprotein phosphatase activity;MF:metal ion binding;MF:phosphoprotein phosphatase activity;MF:metal ion binding;MF:phosphoprotein phosphatase activity;	K06269	PPP1C	map03015	mRNA surveillance pathway	------	------	gi|75312309|sp|Q9M9W3.1|PP19_ARATH;	RecName: Full=Serine/threonine-protein phosphatase PP1 isozyme 9;	PF16891.2	STPPase_N	Serine-threonine protein phosphatase N-terminal domain
TRINITY_DN47168_c0_g1	1885	0.035	2.28	5.31		------	------	------	------	------	------	------	------	------	------	------	------	------
TRINITY_DN47171_c6_g1	1118	1.335	0	0.17		------	------	------	------	------	------	------	------	------	------	------	------	------
TRINITY_DN47173_c4_g1	679	0	15.51	3.41		------	------	------	------	------	------	------	------	------	------	------	------	------
TRINITY_DN47178_c1_g1	1858	12.935	1.76	2.635	PREDICTED: ABC transporter B family member 20-like [Phoenix dactylifera]	GO:0016021;GO:0005524;GO:0042626	CC:integral component of membrane;MF:ATP binding;MF:ATPase activity, coupled to transmembrane movement of substances;	K05658	ABCB1, CD243	map02010	ABC transporters	------	------	gi|90101414|sp|Q8LPT1.2|AB6B_ARATH;	RecName: Full=ABC transporter B family member 6; Short=ABC transporter ABCB.6; Short=AtABCB6; AltName: Full=Multidrug resistance protein 6; AltName: Full=P-glycoprotein 6;	PF00005.24;PF00664.20	ABC_tran;ABC_membrane	ABC transporter;ABC transporter transmembrane region
TRINITY_DN47180_c7_g1	462	3.14	35.075	24.485	Thaumatin-like protein 1 [Apostasia shenzhenica]	GO:0016021;GO:0016021	CC:integral component of membrane;CC:integral component of membrane;	------	------	------	------	------	------	gi|135915|sp|P28493.1|PR5_ARATH;	RecName: Full=Pathogenesis-related protein 5; Short=PR-5; Flags: Precursor;	PF00314.14	Thaumatin	Thaumatin family
TRINITY_DN47188_c0_g3	652	11.245	53.39	22.855	LOW QUALITY PROTEIN: 3-ketoacyl-CoA synthase 3-like [Asparagus officinalis]	GO:0006633;GO:0016021;GO:0016747	BP:fatty acid biosynthetic process;CC:integral component of membrane;MF:transferase activity, transferring acyl groups other than amino-acyl groups;	K15397	KCS	map00062	Fatty acid elongation	------	------	gi|334302892|sp|Q9LQP8.3|KCS3_ARATH;	RecName: Full=3-ketoacyl-CoA synthase 3; Short=KCS-3; AltName: Full=Very long-chain fatty acid condensing enzyme 3; Short=VLCFA condensing enzyme 3; Flags: Precursor;	PF08541.7;PF02797.12	ACP_syn_III_C;Chal_sti_synt_C	3-Oxoacyl-[acyl-carrier-protein;Chalcone and stilbene synthases, C-terminal domain
TRINITY_DN47194_c2_g3	2064	1.44	0.13	0.08		------	------	------	------	------	------	------	------	------	------	------	------	------
TRINITY_DN47252_c8_g1	2014	6.69	24.285	16.345	LOW QUALITY PROTEIN: U-box domain-containing protein 2 [Rosa chinensis]	------	------	------	------	------	------	------	------	gi|357529165|sp|O22193.3|PUB4_ARATH;	RecName: Full=U-box domain-containing protein 4; AltName: Full=Plant U-box protein 4;	------	------	------
TRINITY_DN47288_c0_g1	1137	3.065	32.9	20.9	PREDICTED: glutathione S-transferase U17-like [Phoenix dactylifera]	GO:0016740;GO:0016740;GO:0016740;GO:0016740	MF:transferase activity;MF:transferase activity;MF:transferase activity;MF:transferase activity;	K00799	GST, gst	map00480	Glutathione metabolism	------	------	gi|75334347|sp|Q9FUS9.1|GSTUI_ARATH;	RecName: Full=Glutathione S-transferase U18; Short=AtGSTU18; AltName: Full=GST class-tau member 18; AltName: Full=Glutathione S-transferase 29;	PF13410.3;PF00043.22	GST_C_2;GST_C	Glutathione S-transferase, C-terminal domain;Glutathione S-transferase, C-terminal domain
TRINITY_DN47327_c6_g1	1195	0.05	1.735	0.86		------	------	------	------	------	------	------	------	------	------	------	------	------
TRINITY_DN47336_c1_g1	1738	58.21	11.245	10.92	PREDICTED: NAC domain-containing protein 35-like [Elaeis guineensis]	GO:0006355;GO:0006351;GO:1901002;GO:1902584;GO:0045893;GO:0006351;GO:0006355;GO:0006351;GO:0005634;GO:0005634;GO:0005634;GO:0003677;GO:0043565;GO:0003677	BP:regulation of transcription, DNA-templated;BP:transcription, DNA-templated;BP:positive regulation of response to salt stress;BP:positive regulation of response to water deprivation;BP:positive regulation of transcription, DNA-templated;BP:transcription, DNA-templated;BP:regulation of transcription, DNA-templated;BP:transcription, DNA-templated;CC:nucleus;CC:nucleus;CC:nucleus;MF:DNA binding;MF…	------	------	------	------	------	------	gi|75217017|sp|Q9ZVP8.2|NAC35_ARATH;	RecName: Full=NAC domain-containing protein 35; Short=ANAC035; AltName: Full=Protein LONG VEGETATIVE PHASE 1; Short=AtLOV1;	PF02365.12	NAM	No apical meristem
TRINITY_DN47344_c6_g1	750	0.195	19.57	2.16	Oleosin 16 kDa [Apostasia shenzhenica]	GO:0016021;GO:0012511;GO:0016021;GO:0012511;GO:0016021;GO:0012511	CC:integral component of membrane;CC:monolayer-surrounded lipid storage body;CC:integral component of membrane;CC:monolayer-surrounded lipid storage body;CC:integral component of membrane;CC:monolayer-surrounded lipid storage body;	------	------	------	------	------	------	gi|1027907298|sp|Q42980.3|OLEO1_ORYSJ;	RecName: Full=Oleosin 16 kDa; AltName: Full=OSE701;	PF01277.14	Oleosin	Oleosin
TRINITY_DN47370_c0_g1	1304	12.615	859.99	24.265		------	------	------	------	------	------	------	------	------	------	PF00257.16	Dehydrin	Dehydrin
TRINITY_DN47370_c0_g2	490	16.38	2427.53	47.595		------	------	------	------	------	------	------	------	------	------	PF00257.16	Dehydrin	Dehydrin
TRINITY_DN47416_c1_g1	929	53.15	3.765	2.32	uncharacterized protein LOC110093977 [Dendrobium catenatum]	GO:0045454;GO:0035556;GO:0045454;GO:0035556;GO:0005622;GO:0005622;GO:0009055;GO:0015035;GO:0009055;GO:0015035	BP:cell redox homeostasis;BP:intracellular signal transduction;BP:cell redox homeostasis;BP:intracellular signal transduction;CC:intracellular;CC:intracellular;MF:electron carrier activity;MF:protein disulfide oxidoreductase activity;MF:electron carrier activity;MF:protein disulfide oxidoreductase activity;	------	------	------	------	------	------	gi|13878514|sp|Q9JY15.1|GLRX_NEIMB;	RecName: Full=Glutaredoxin;	PF00462.21	Glutaredoxin	Glutaredoxin
TRINITY_DN47423_c3_g1	981	28.795	0.655	16.235	probable LRR receptor-like serine/threonine-protein kinase At3g47570 [Jatropha curcas]	GO:0016021;GO:0016021;GO:0005524;GO:0004674;GO:0005524;GO:0004674	CC:integral component of membrane;CC:integral component of membrane;MF:ATP binding;MF:protein serine/threonine kinase activity;MF:ATP binding;MF:protein serine/threonine kinase activity;	------	------	------	------	------	------	gi|75339043|sp|Q9ZUI0.1|Y2241_ARATH;	RecName: Full=Putative leucine-rich repeat receptor-like serine/threonine-protein kinase At2g24130; Flags: Precursor;	------	------	------
TRINITY_DN47444_c0_g4	880	9.595	70.925	38.565	PREDICTED: uncharacterized protein LOC103718989 [Phoenix dactylifera]	------	------	------	------	------	------	------	------	------	------	------	------	------
TRINITY_DN47481_c4_g2	404	116.325	9.02	9.335		------	------	------	------	------	------	------	------	------	------	PF12734.4	CYSTM	Cysteine-rich TM module stress tolerance
TRINITY_DN47486_c4_g8	478	1.405	18.675	23.015	PREDICTED: protein SENESCENCE-ASSOCIATED GENE 21, mitochondrial-like [Elaeis guineensis]	GO:0006950;GO:0006950	BP:response to stress;BP:response to stress;	------	------	------	------	------	------	gi|75163268|sp|Q93WF6.1|SAG21_ARATH;	RecName: Full=Protein SENESCENCE-ASSOCIATED GENE 21, mitochondrial; AltName: Full=Late embryogenensis abundant like 5; Short=AtLEA5; Flags: Precursor;	PF03242.10	LEA_3	Late embryogenesis abundant protein
TRINITY_DN47494_c4_g4	788	2.165	0	0.165		------	------	------	------	------	------	------	------	------	------	------	------	------
TRINITY_DN47541_c5_g1	825	6.645	38.265	41.83		------	------	------	------	------	------	------	------	------	------	------	------	------
TRINITY_DN47562_c1_g1	1308	8.615	0.58	1.525	polygalacturonase inhibitor-like [Asparagus officinalis]	------	------	------	------	------	------	------	------	gi|464367|sp|Q05091.1|PGIP_PYRCO;	RecName: Full=Polygalacturonase inhibitor; AltName: Full=Polygalacturonase-inhibiting protein; Short=PGIG; Flags: Precursor;	PF13855.3;PF12799.4;PF08263.9	LRR_8;LRR_4;LRRNT_2	Leucine rich repeat;Leucine Rich repeats;Leucine rich repeat N-terminal domain
TRINITY_DN47562_c1_g2	1245	6.965	0.415	0.665	polygalacturonase inhibitor-like [Asparagus officinalis]	------	------	------	------	------	------	------	------	gi|464367|sp|Q05091.1|PGIP_PYRCO;	RecName: Full=Polygalacturonase inhibitor; AltName: Full=Polygalacturonase-inhibiting protein; Short=PGIG; Flags: Precursor;	PF13855.3;PF12799.4;PF08263.9	LRR_8;LRR_4;LRRNT_2	Leucine rich repeat;Leucine Rich repeats;Leucine rich repeat N-terminal domain
TRINITY_DN47569_c10_g1	1128	2.3	0.165	0.145	uncharacterized protein A4U43_C05F19150 [Asparagus officinalis]	------	------	------	------	------	------	------	------	------	------	PF03478.15	DUF295	Protein of unknown function
TRINITY_DN47572_c0_g1	1028	382.305	42.39	87.015	hypothetical protein OsI_26973 [Oryza sativa Indica Group]	GO:0016021;GO:0033897;GO:0003723;GO:0033897;GO:0003723;GO:0005525;GO:0003924;GO:0033897;GO:0003723	CC:integral component of membrane;MF:ribonuclease T2 activity;MF:RNA binding;MF:ribonuclease T2 activity;MF:RNA binding;MF:GTP binding;MF:GTPase activity;MF:ribonuclease T2 activity;MF:RNA binding;	K01166	E3.1.27.1	------	------	------	------	gi|2500572|sp|Q38716.1|RNS2_ANTHI;	RecName: Full=Ribonuclease S-2; AltName: Full=S2-RNase; AltName: Full=Stylar glycoprotein 2; Flags: Precursor;	PF00445.15	Ribonuclease_T2	Ribonuclease T2 family
TRINITY_DN47669_c10_g1	934	0.895	6.55	3.37	uncharacterized protein A4U43_C07F37210 [Asparagus officinalis]	GO:0016021;GO:0022857	CC:integral component of membrane;MF:transmembrane transporter activity;	------	------	------	------	------	------	gi|75337175|sp|Q9SFG0.1|STP6_ARATH;	RecName: Full=Sugar transport protein 6; AltName: Full=Hexose transporter 6;	PF00083.21;PF07690.13;PF13347.3;PF06609.10	Sugar_tr;MFS_1;MFS_2;TRI12	Sugar;Major Facilitator Superfamily;MFS/sugar transport protein;Fungal trichothecene efflux pump
TRINITY_DN47675_c0_g1	1850	82.78	20.205	17.295	probable ureidoglycolate hydrolase [Asparagus officinalis]	GO:0008152;GO:0008152;GO:0016813;GO:0016813	BP:metabolic process;BP:metabolic process;MF:hydrolase activity, acting on carbon-nitroge;MF:hydrolase activity, acting on carbon-nitroge;	K18151	UAH	map00230	Purine metabolism	COG0624	E:Amino acid transport and metabolism	gi|122232646|sp|Q2QMN7.2|UAH_ORYSJ;	RecName: Full=Probable ureidoglycolate hydrolase; Short=OsUAH; Flags: Precursor;	PF01546.25;PF04389.14	Peptidase_M20;Peptidase_M28	Peptidase family M20/M25/M40;Peptidase family M28
TRINITY_DN47698_c4_g2	777	10.29	0	0.215		------	------	------	------	------	------	------	------	------	------	------	------	------
TRINITY_DN47710_c4_g1	1161	0.44	6.18	31.765	PREDICTED: chaperone protein DnaJ-like isoform X1 [Elaeis guineensis]	------	------	------	------	------	------	------	------	------	------	PF00226.28	DnaJ	DnaJ domain
TRINITY_DN47836_c3_g2	1703	22.99	3.395	5.405	PREDICTED: histone-lysine N-methyltransferase SETD1B [Elaeis guineensis]	GO:0008152;GO:0016758	BP:metabolic process;MF:transferase activity, transferring hexosyl groups;	------	------	------	------	------	------	gi|75315657|sp|Q9ZQ96.1|U73C3_ARATH;	RecName: Full=UDP-glycosyltransferase 73C3;	PF00201.15	UDPGT	UDP-glucoronosyl and UDP-glucosyl transferase
TRINITY_DN47860_c3_g2	551	83.16	16.23	44.36	heat shock cognate protein 80 [Hevea brasiliensis]	GO:0006457;GO:0006950;GO:0006457;GO:0006950;GO:0005524;GO:0016787;GO:0051082;GO:0005524;GO:0051082	BP:protein folding;BP:response to stress;BP:protein folding;BP:response to stress;MF:ATP binding;MF:hydrolase activity;MF:unfolded protein binding;MF:ATP binding;MF:unfolded protein binding;	K04079	HSP90A, htpG	map04626;map04141	Plant-pathogen interaction;Protein processing in endoplasmic reticulum	------	------	gi|158513648|sp|A2YWQ1.1|HSP81_ORYSI;	RecName: Full=Heat shock protein 81-1; Short=HSP81-1; AltName: Full=Heat shock protein 82 >gi|158564094|sp|Q0J4P2.2|HSP81_ORYSJ RecName: Full=Heat shock protein 81-1; Short=HSP81-1; AltName: Full=Heat shock protein 82;	PF00183.15	HSP90	Hsp90 protein
TRINITY_DN47879_c4_g1	741	3.615	0.3	0.645		------	------	------	------	------	------	------	------	------	------	------	------	------
TRINITY_DN47914_c3_g1	1451	34.505	5.53	6.965	uncharacterized protein A4U43_C02F6330 [Asparagus officinalis]	GO:0005524;GO:0004672;GO:0005524;GO:0004672	MF:ATP binding;MF:protein kinase activity;MF:ATP binding;MF:protein kinase activity;	------	------	------	------	------	------	gi|75333641|sp|Q9CAD5.1|YODA_ARATH;	RecName: Full=Mitogen-activated protein kinase kinase kinase YODA; AltName: Full=YODA MAPKK kinase;	------	------	------
TRINITY_DN47929_c1_g1	695	5.195	0.1	0.935	PREDICTED: L-type lectin-domain containing receptor kinase IV.1-like [Elaeis guineensis]	------	------	------	------	------	------	------	------	gi|75318755|sp|O81291.1|LRK44_ARATH;	RecName: Full=L-type lectin-domain containing receptor kinase IV.4; Short=LecRK-IV.4; Flags: Precursor;	------	------	------
TRINITY_DN47938_c5_g2	2340	0.175	2.375	5.35		------	------	------	------	------	------	------	------	------	------	------	------	------
TRINITY_DN47950_c0_g3	579	73	13.03	62.76	LOW QUALITY PROTEIN: crocetin glucosyltransferase, chloroplastic-like [Asparagus officinalis]	GO:0008152;GO:0008152;GO:0009536;GO:0016758;GO:0016758	BP:metabolic process;BP:metabolic process;CC:plastid;MF:transferase activity, transferring hexosyl groups;MF:transferase activity, transferring hexosyl groups;	K21371	UGT75L6, UGTCs2	------	------	------	------	gi|678019168|sp|F8WKW0.1|UGT1_GARJA;	RecName: Full=Crocetin glucosyltransferase, chloroplastic; AltName: Full=UDP-glucose glucosyltransferase 1; Short=GjUGT1; AltName: Full=UDP-glycosyltransferase 75L6; Flags: Precursor;	PF00201.15;PF04101.13	UDPGT;Glyco_tran_28_C	UDP-glucoronosyl and UDP-glucosyl transferase;Glycosyltransferase family 28 C-terminal domain
TRINITY_DN47950_c1_g1	2272	340.7	51.235	58.3	Flavonoid glucosyltransferase, family GT1 [Zostera marina]	GO:0008152;GO:0008152;GO:0008152;GO:0008152;GO:0016758;GO:0016758;GO:0016758;GO:0016758	BP:metabolic process;BP:metabolic process;BP:metabolic process;BP:metabolic process;MF:transferase activity, transferring hexosyl groups;MF:transferase activity, transferring hexosyl groups;MF:transferase activity, transferring hexosyl groups;MF:transferase activity, transferring hexosyl groups;	------	------	------	------	------	------	gi|334351258|sp|Q9C9B0.2|U89B1_ARATH;	RecName: Full=UDP-glycosyltransferase 89B1; AltName: Full=Flavonol 3-O-glucosyltransferase UGT89B1; AltName: Full=Flavonol 7-O-glucosyltransferase UGT89B1;	PF00201.15;PF04101.13	UDPGT;Glyco_tran_28_C	UDP-glucoronosyl and UDP-glucosyl transferase;Glycosyltransferase family 28 C-terminal domain
TRINITY_DN47992_c3_g2	1384	4.525	0.38	0.47		------	------	------	------	------	------	------	------	------	------	------	------	------
TRINITY_DN47999_c6_g1	1783	2.565	0.04	1.285		------	------	------	------	------	------	------	------	------	------	------	------	------
TRINITY_DN48009_c7_g1	2985	0	1.6	2.58	putative LRR receptor-like serine/threonine-protein kinase [Dendrobium catenatum]	GO:0016021;GO:0016301;GO:0005524;GO:0004714	CC:integral component of membrane;MF:kinase activity;MF:ATP binding;MF:transmembrane receptor protein tyrosine kinase activity;	------	------	------	------	------	------	------	------	------	------	------
TRINITY_DN48051_c4_g1	1386	14.715	2.435	9.08	PREDICTED: protein GPR107-like [Phoenix dactylifera]	GO:0016021;GO:0016021	CC:integral component of membrane;CC:integral component of membrane;	------	------	------	------	------	------	gi|71152087|sp|Q8BUV8.2|GP107_MOUSE;	RecName: Full=Protein GPR107; Flags: Precursor;	PF06814.10	Lung_7-TM_R	Lung seven transmembrane receptor
TRINITY_DN48061_c13_g2	1741	0.875	0.025	0.52	hypothetical protein EUGRSUZ_I02519 [Eucalyptus grandis]	GO:0016021;GO:0016021;GO:0016021;GO:0019706;GO:0019706;GO:0019706	CC:integral component of membrane;CC:integral component of membrane;CC:integral component of membrane;MF:protein-cysteine S-palmitoyltransferase activity;MF:protein-cysteine S-palmitoyltransferase activity;MF:protein-cysteine S-palmitoyltransferase activity;	K20032	ZDHHC13_17, HIP14	------	------	------	------	gi|75282678|sp|Q52T38.1|ZDH22_ARATH;	RecName: Full=Protein S-acyltransferase 24; AltName: Full=Ankyrin repeat-containing S-palmitoyltransferase; AltName: Full=Palmitoyltransferase TIP1; AltName: Full=Protein TIP GROWTH DEFECTIVE 1; Short=AtTIP1; AltName: Full=Zinc finger DHHC domain-containing protein TIP1;	PF12796.4;PF13857.3;PF13606.3;PF00023.27;PF13637.3	Ank_2;Ank_5;Ank_3;Ank;Ank_4	Ankyrin repeats;Ankyrin repeats;Ankyrin repeat;Ankyrin repeat;Ankyrin repeats
TRINITY_DN48115_c8_g1	1188	0.05	3.025	0.825		------	------	------	------	------	------	------	------	------	------	------	------	------
TRINITY_DN48118_c10_g1	1076	0.7	15.52	38.81	serine--glyoxylate aminotransferase [Populus trichocarpa]	GO:0008483;GO:0003824;GO:0008483	MF:transaminase activity;MF:catalytic activity;MF:transaminase activity;	K00830	AGXT	map00630;map00250;map00260;map04146	Glyoxylate and dicarboxylate metabolism;Alanine, aspartate and glutamate metabolism;Glycine, serine and threonine metabolism;Peroxisome	------	------	gi|90185106|sp|Q56YA5.2|SGAT_ARATH;	RecName: Full=Serine--glyoxylate aminotransferase; AltName: Full=Alanine--glyoxylate aminotransferase; Short=AGT; AltName: Full=Asparagine aminotransferase; AltName: Full=Serine--pyruvate aminotransferase;	------	------	------
TRINITY_DN48127_c2_g2	1756	360.055	43.415	54.23	PREDICTED: ammonium transporter 3 member 1-like [Musa acuminata subsp. malaccensis]	GO:0016021;GO:0016021;GO:0008519;GO:0008519	CC:integral component of membrane;CC:integral component of membrane;MF:ammonium transmembrane transporter activity;MF:ammonium transmembrane transporter activity;	K03320	amt, AMT, MEP	------	------	COG0004	P:Inorganic ion transport and metabolism	gi|75146874|sp|Q84KJ6.1|AMT31_ORYSJ;	RecName: Full=Ammonium transporter 3 member 1; Short=OsAMT3;1;	PF00909.18	Ammonium_transp	Ammonium Transporter Family
TRINITY_DN48145_c0_g9	671	33.055	6.13	25.85	probable receptor-like protein kinase At1g11050 [Asparagus officinalis]	GO:0016021;GO:0016021;GO:0005524;GO:0004672;GO:0005524;GO:0004672	CC:integral component of membrane;CC:integral component of membrane;MF:ATP binding;MF:protein kinase activity;MF:ATP binding;MF:protein kinase activity;	------	------	------	------	------	------	gi|75317752|sp|O04086.1|Y1105_ARATH;	RecName: Full=Probable receptor-like protein kinase At1g11050; Flags: Precursor;	PF07714.14;PF00069.22	Pkinase_Tyr;Pkinase	Protein tyrosine kinase;Protein kinase domain
TRINITY_DN48163_c7_g1	916	7.29	0.54	0		------	------	------	------	------	------	------	------	------	------	------	------	------
TRINITY_DN48172_c2_g1	1140	13.505	1.865	2.425	PREDICTED: uncharacterized protein LOC105040143 [Elaeis guineensis]	GO:0016021;GO:0016021;GO:0016021	CC:integral component of membrane;CC:integral component of membrane;CC:integral component of membrane;	------	------	------	------	------	------	------	------	------	------	------
TRINITY_DN48180_c3_g1	1526	0	5.545	1.755		------	------	------	------	------	------	------	------	------	------	------	------	------
TRINITY_DN48250_c3_g5	837	13.35	58.915	93.97	ethylene-responsive transcription factor ERF053-like [Dendrobium catenatum]	GO:0006351;GO:0005634;GO:0003677;GO:0003700	BP:transcription, DNA-templated;CC:nucleus;MF:DNA binding;MF:transcription factor activity, sequence-specific DNA binding;	------	------	------	------	------	------	gi|75264007|sp|Q9LM15.1|RA213_ARATH;	RecName: Full=Ethylene-responsive transcription factor RAP2-13; AltName: Full=Ethylene-responsive transcription factor ERF058; AltName: Full=Protein RELATED TO APETALA2 13;	------	------	------
TRINITY_DN48264_c5_g2	579	69.89	9.73	4.215	PREDICTED: EG45-like domain containing protein [Elaeis guineensis]	------	------	------	------	------	------	------	------	gi|20138450|sp|Q9ZV52.2|EGC2_ARATH;	RecName: Full=EG45-like domain containing protein 2; AltName: Full=Plant natriuretic peptide A; Short=AtEXPR3; Short=AtPNP-A; Short=Ath-ExpGamma-1.2; Flags: Precursor;	PF03330.15	DPBB_1	Lytic transglycolase
TRINITY_DN48306_c5_g1	1201	4.985	0.89	2.07		------	------	------	------	------	------	------	------	------	------	------	------	------
TRINITY_DN48359_c1_g1	748	28.985	1.38	6.525	PREDICTED: WAS/WASL-interacting protein family member 1-like [Phoenix dactylifera]	------	------	------	------	------	------	------	------	------	------	PF05678.11	VQ	VQ motif
TRINITY_DN48405_c5_g1	785	33.56	1.38	0	rust resistance kinase Lr10-like [Ananas comosus]	GO:0016021;GO:0005524;GO:0004672;GO:0005524;GO:0004672	CC:integral component of membrane;MF:ATP binding;MF:protein kinase activity;MF:ATP binding;MF:protein kinase activity;	------	------	------	------	------	------	------	------	------	------	------
TRINITY_DN48428_c10_g2	552	157.415	6.14	5.635	polygalacturonase inhibitor-like [Asparagus officinalis]	------	------	------	------	------	------	------	------	gi|464367|sp|Q05091.1|PGIP_PYRCO;	RecName: Full=Polygalacturonase inhibitor; AltName: Full=Polygalacturonase-inhibiting protein; Short=PGIG; Flags: Precursor;	PF08263.9	LRRNT_2	Leucine rich repeat N-terminal domain
TRINITY_DN48431_c2_g1	1623	1.99	0.12	0.06	putative copia-type protein [Trifolium pratense]	------	------	------	------	------	------	------	------	------	------	------	------	------
TRINITY_DN48436_c5_g1	1016	2.645	0.055	2.87		------	------	------	------	------	------	------	------	------	------	------	------	------
TRINITY_DN48461_c4_g1	1045	0.06	2.86	1.175		------	------	------	------	------	------	------	------	------	------	------	------	------
TRINITY_DN48503_c0_g1	1451	3.06	0	0.125		------	------	------	------	------	------	------	------	------	------	------	------	------
TRINITY_DN48514_c1_g1	835	0.355	4.715	1.235	PREDICTED: uncharacterized protein LOC105053222 [Elaeis guineensis]	------	------	------	------	------	------	------	------	gi|75180217|sp|Q9LQU4.1|PCR2_ARATH;	RecName: Full=Protein PLANT CADMIUM RESISTANCE 2; Short=AtPCR2;	PF04749.14	PLAC8	PLAC8 family
TRINITY_DN48540_c2_g2	1712	2.5	0.015	0.165		------	------	------	------	------	------	------	------	------	------	------	------	------
TRINITY_DN48541_c0_g3	1640	0.51	5.405	2.125	PREDICTED: dehydration-responsive element-binding protein 2B-like isoform X1 [Phoenix dactylifera]	GO:0006351;GO:0006351;GO:0006351;GO:0005634;GO:0005634;GO:0005634;GO:0003677;GO:0003700;GO:0003677;GO:0003700;GO:0003677;GO:0003700	BP:transcription, DNA-templated;BP:transcription, DNA-templated;BP:transcription, DNA-templated;CC:nucleus;CC:nucleus;CC:nucleus;MF:DNA binding;MF:transcription factor activity, sequence-specific DNA binding;MF:DNA binding;MF:transcription factor activity, sequence-specific DNA binding;MF:DNA binding;MF:transcription factor activity, sequence-specific DNA binding;	------	------	------	------	------	------	gi|172044096|sp|A2WL19.2|DRE2A_ORYSI;	RecName: Full=Dehydration-responsive element-binding protein 2A; Short=Protein DREB2A;	PF00847.17	AP2	AP2 domain
TRINITY_DN48568_c2_g4	523	498.35	1.965	7.08		------	------	------	------	------	------	------	------	------	------	------	------	------
TRINITY_DN48568_c2_g5	432	457.08	4.395	1035.77		------	------	------	------	------	------	------	------	------	------	------	------	------
TRINITY_DN48604_c4_g1	649	0	4.235	2.56		------	------	------	------	------	------	------	------	------	------	------	------	------
TRINITY_DN48620_c1_g1	1461	16.24	2.035	2.77	LOW QUALITY PROTEIN: RNA polymerase sigma factor sigE, chloroplastic/mitochondrial-like [Asparagus officinalis]	GO:0006352;GO:0071483;GO:0071472;GO:0009658;GO:0006352;GO:0009553;GO:0010207;GO:0045893;GO:0010218;GO:0010114;GO:0006352;GO:0006352;GO:0005739;GO:0003700;GO:0003700;GO:0001053;GO:0003700;GO:0003700	BP:DNA-templated transcription, initiation;BP:cellular response to blue light;BP:cellular response to salt stress;BP:chloroplast organization;BP:DNA-templated transcription, initiation;BP:embryo sac development;BP:photosystem II assembly;BP:positive regulation of transcription, DNA-templated;BP:response to far red light;BP:response to red light;BP:DNA-templated transcription, initiation;BP:DNA-te…	K03093	SIGMA70	------	------	------	------	gi|75267675|sp|Q9ZNX9.1|SIGE_ARATH;	RecName: Full=RNA polymerase sigma factor sigE, chloroplastic/mitochondrial; Short=Sigma factor E; Short=Sigma-E; AltName: Full=RNA polymerase sigma factor sig5; Short=Atsig5; Short=Sigma factor 5; Flags: Precursor;	------	------	------
TRINITY_DN48622_c2_g1	535	0.605	13.59	2.585		------	------	------	------	------	------	------	------	------	------	------	------	------
TRINITY_DN48682_c4_g1	498	8.93	84.115	14.635	uncharacterized protein LOC110112773 [Dendrobium catenatum]	------	------	------	------	------	------	------	------	------	------	------	------	------
TRINITY_DN48744_c5_g3	2271	0.085	1.09	0.16		------	------	------	------	------	------	------	------	------	------	------	------	------
TRINITY_DN48750_c0_g2	1801	4.25	3.14	34.265	PREDICTED: receptor-like serine/threonine-protein kinase SD1-8 isoform X3 [Elaeis guineensis]	------	------	------	------	------	------	------	------	gi|75335771|sp|Q9M0X5.1|CRK25_ARATH;	RecName: Full=Cysteine-rich receptor-like protein kinase 25; Short=Cysteine-rich RLK25; Flags: Precursor;	------	------	------
TRINITY_DN48785_c0_g4	1505	142.025	7.895	12.19	elicitor-responsive protein 1 isoform X2 [Asparagus officinalis]	------	------	------	------	------	------	------	------	gi|122222407|sp|Q0JHU5.1|ERG1_ORYSJ;	RecName: Full=Elicitor-responsive protein 1; AltName: Full=17 kDa phloem protein; AltName: Full=Fungal elicitor immediate early-responsive gene 1 protein; Short=FIERG1; AltName: Full=RPP17 >gi|158513217|sp|A2WWV5.2|ERG1_ORYSI RecName: Full=Elicitor-responsive protein 1; AltName: Full=17 kDa phloem protein; AltName: Full=Fungal elicitor immediate early-responsive gene 1 protein; Short=FIERG1; AltN…	------	------	------
TRINITY_DN48790_c1_g2	614	118.29	15.39	84.12	chaperonin-like RbcX protein 2, chloroplastic [Asparagus officinalis]	------	------	------	------	------	------	------	------	------	------	PF02341.12	RcbX	RbcX protein
TRINITY_DN48805_c2_g1	742	126.95	21.65	29.93	PREDICTED: U-box domain-containing protein 41-like [Phoenix dactylifera]	GO:0004842;GO:0004842	MF:ubiquitin-protein transferase activity;MF:ubiquitin-protein transferase activity;	------	------	------	------	------	------	gi|122242631|sp|Q0WUF6.1|PUB41_ARATH;	RecName: Full=U-box domain-containing protein 41; AltName: Full=Plant U-box protein 41;	PF00514.20;PF13646.3	Arm;HEAT_2	Armadillo/beta-catenin-like repeat;HEAT repeats
TRINITY_DN48807_c5_g1	1420	0.865	0	0.215		------	------	------	------	------	------	------	------	------	------	------	------	------
TRINITY_DN48814_c3_g3	1135	8.42	0.4	0.41	LOW QUALITY PROTEIN: scarecrow-like protein 9, partial [Asparagus officinalis]	GO:0006355;GO:0006351	BP:regulation of transcription, DNA-templated;BP:transcription, DNA-templated;	------	------	------	------	------	------	gi|75099994|sp|O80933.1|SCL9_ARATH;	RecName: Full=Scarecrow-like protein 9; Short=AtSCL9; AltName: Full=GRAS family protein 13; Short=AtGRAS-13;	PF03514.11	GRAS	GRAS domain family
TRINITY_DN48859_c2_g1	889	65.56	11.29	17.735	RNI-like superfamily protein [Theobroma cacao]	GO:0006351;GO:0006351;GO:0005634;GO:0005634;GO:0003700;GO:0043565;GO:0003700;GO:0043565	BP:transcription, DNA-templated;BP:transcription, DNA-templated;CC:nucleus;CC:nucleus;MF:transcription factor activity, sequence-specific DNA binding;MF:sequence-specific DNA binding;MF:transcription factor activity, sequence-specific DNA binding;MF:sequence-specific DNA binding;	K13424	WRKY33	map04016;map04626	MAPK signaling pathway - plant;Plant-pathogen interaction	------	------	gi|148887455|sp|Q8S8P5.2|WRK33_ARATH;	RecName: Full=Probable WRKY transcription factor 33; AltName: Full=WRKY DNA-binding protein 33;	------	------	------
TRINITY_DN48868_c4_g1	539	0	7.18	0.245		------	------	------	------	------	------	------	------	------	------	------	------	------
TRINITY_DN48874_c8_g3	1000	0.1	2.715	3.565		------	------	------	------	------	------	------	------	------	------	------	------	------
TRINITY_DN48879_c11_g1	1058	0.86	7.535	2.15		------	------	------	------	------	------	------	------	------	------	------	------	------
TRINITY_DN48937_c7_g2	1147	24.78	2.825	3.83	PREDICTED: probable serine/threonine-protein kinase PIX13 [Elaeis guineensis]	GO:0005524;GO:0004674;GO:0005524;GO:0004674	MF:ATP binding;MF:protein serine/threonine kinase activity;MF:ATP binding;MF:protein serine/threonine kinase activity;	K04733	IRAK4	------	------	COG0515	T:Signal transduction mechanisms	gi|12644274|sp|P46573.2|APK1B_ARATH;	RecName: Full=Protein kinase APK1B, chloroplastic; Flags: Precursor;	PF00069.22;PF07714.14	Pkinase;Pkinase_Tyr	Protein kinase domain;Protein tyrosine kinase
TRINITY_DN48940_c2_g1	1669	0.25	4.675	0.675		------	------	------	------	------	------	------	------	------	------	------	------	------
TRINITY_DN48943_c3_g1	646	3.67	69.565	5.96	PREDICTED: uncharacterized protein LOC105041167 [Elaeis guineensis]	GO:0016021;GO:0016021	CC:integral component of membrane;CC:integral component of membrane;	------	------	------	------	------	------	------	------	------	------	------
TRINITY_DN48956_c2_g2	2078	0.19	1.715	0.875		------	------	------	------	------	------	------	------	------	------	------	------	------
TRINITY_DN48972_c0_g1	742	21.35	0.66	8.345	receptor-like serine/threonine-protein kinase SD1-8 [Phalaenopsis equestris]	------	------	K04733	IRAK4	------	------	------	------	gi|134530|sp|P22552.1|SLSG1_BRAOA;	RecName: Full=S-locus-specific glycoprotein BS29-1; Flags: Precursor;	PF00954.17;PF08276.8	S_locus_glycop;PAN_2	S-locus glycoprotein domain;PAN-like domain
TRINITY_DN48980_c0_g5	759	32.055	196.455	280.89	PREDICTED: zinc finger CCCH domain-containing protein 20-like [Glycine max]	GO:0046872;GO:0046872	MF:metal ion binding;MF:metal ion binding;	------	------	------	------	------	------	gi|75262988|sp|Q9FU27.1|C3H2_ORYSJ;	RecName: Full=Zinc finger CCCH domain-containing protein 2; Short=OsC3H2; AltName: Full=Protein DELAY OF THE ONSET OF SENESCENCE; Short=OsDOS;	------	------	------
TRINITY_DN48989_c1_g4	1749	5.185	0.34	0.185		------	------	------	------	------	------	------	------	------	------	------	------	------
TRINITY_DN49001_c0_g4	1064	14	0.03	2.595	FAR1 DNA binding domain [Macleaya cordata]	GO:0006355;GO:0006355;GO:0006355;GO:0006355;GO:0008270;GO:0008270;GO:0008270;GO:0008270	BP:regulation of transcription, DNA-templated;BP:regulation of transcription, DNA-templated;BP:regulation of transcription, DNA-templated;BP:regulation of transcription, DNA-templated;MF:zinc ion binding;MF:zinc ion binding;MF:zinc ion binding;MF:zinc ion binding;	------	------	------	------	------	------	gi|75213627|sp|Q9SZL8.1|FRS5_ARATH;	RecName: Full=Protein FAR1-RELATED SEQUENCE 5;	PF04434.14	SWIM	SWIM zinc finger
TRINITY_DN49035_c3_g4	2074	5.495	0.01	0.11	PREDICTED: putative transcription factor bHLH041 [Elaeis guineensis]	------	------	------	------	------	------	------	------	gi|75311566|sp|Q9LTS4.1|BH041_ARATH;	RecName: Full=Putative transcription factor bHLH041; AltName: Full=Basic helix-loop-helix protein 41; Short=AtbHLH41; Short=bHLH 41; AltName: Full=Transcription factor EN 51; AltName: Full=bHLH transcription factor bHLH041;	PF00010.23	HLH	Helix-loop-helix DNA-binding domain
TRINITY_DN49042_c2_g1	1168	0.395	6.535	1.36	hypothetical protein POPTR_009G047900v3 [Populus trichocarpa]	GO:0006614;GO:0006614;GO:0006614;GO:0006614;GO:0048500;GO:0005786;GO:0005786;GO:0005786;GO:0008312;GO:0005525;GO:0003924;GO:0008312;GO:0005525;GO:0003924;GO:0008312;GO:0005525;GO:0003924;GO:0008312;GO:0005525;GO:0003924	BP:SRP-dependent cotranslational protein targeting to membrane;BP:SRP-dependent cotranslational protein targeting to membrane;BP:SRP-dependent cotranslational protein targeting to membrane;BP:SRP-dependent cotranslational protein targeting to membrane;CC:signal recognition particle;CC:signal recognition particle, endoplasmic reticulum targeting;CC:signal recognition particle, endoplasmic reticulu…	K03106	SRP54, ffh	map03060	Protein export	------	------	gi|1711508|sp|P49968.1|SR541_HORVU;	RecName: Full=Signal recognition particle 54 kDa protein 1; Short=SRP54;	------	------	------
TRINITY_DN49049_c2_g3	1319	0.4	2.8	1.875	PREDICTED: peroxisomal membrane protein 13 [Elaeis guineensis]	GO:0016560;GO:0016560;GO:0016560;GO:0016021;GO:0005777;GO:0016021;GO:0005777;GO:0016021;GO:0005777	BP:protein import into peroxisome matrix, docking;BP:protein import into peroxisome matrix, docking;BP:protein import into peroxisome matrix, docking;CC:integral component of membrane;CC:peroxisome;CC:integral component of membrane;CC:peroxisome;CC:integral component of membrane;CC:peroxisome;	K13344	PEX13	map04146	Peroxisome	------	------	gi|75207380|sp|Q9SRR0.1|PEX13_ARATH;	RecName: Full=Peroxisomal membrane protein 13; AltName: Full=Peroxin-13; Short=AtPEX13; AltName: Full=Peroxisome biogenesis protein 13; AltName: Full=Pex13p; AltName: Full=Protein ABERRANT PEROXISOME MORPHOLOGY 2;	------	------	------
TRINITY_DN49123_c5_g1	291	46.545	0.615	0		------	------	------	------	------	------	------	------	------	------	------	------	------
TRINITY_DN49140_c3_g6	1099	138.955	20.105	37.78	uncharacterized protein LOC110104127 [Dendrobium catenatum]	------	------	------	------	------	------	------	------	gi|139780|sp|P20144.1|WUN1_SOLTU;	RecName: Full=Wound-induced protein 1;	PF07107.8	WI12	Wound-induced protein WI12
TRINITY_DN49149_c2_g1	1661	0	2.605	0.415	hypothetical protein VITISV_007384 [Vitis vinifera]	GO:0015074;GO:0015074;GO:0003676;GO:0003676;GO:0008270	BP:DNA integration;BP:DNA integration;MF:nucleic acid binding;MF:nucleic acid binding;MF:zinc ion binding;	K20617	CYP71A	------	------	------	------	gi|130582|sp|P10978.1|POLX_TOBAC;	RecName: Full=Retrovirus-related Pol polyprotein from transposon TNT 1-94; Includes: RecName: Full=Protease; Includes: RecName: Full=Reverse transcriptase; Includes: RecName: Full=Endonuclease;	------	------	------
TRINITY_DN49185_c4_g4	727	60.305	7.485	39.945	predicted protein [Hordeum vulgare subsp. vulgare]	------	------	K13464	JAZ	map04075	Plant hormone signal transduction	------	------	gi|75147844|sp|Q84R94.1|TI10A_ORYSJ;	RecName: Full=Protein TIFY 10a; Short=OsTIFY10a; AltName: Full=Jasmonate ZIM domain-containing protein 6; Short=OsJAZ6; AltName: Full=OsJAZ5;	PF06200.11;PF09425.7	tify;CCT_2	tify domain;Divergent CCT motif
TRINITY_DN49185_c5_g2	408	21.295	1.62	1.5		------	------	------	------	------	------	------	------	------	------	------	------	------
TRINITY_DN49193_c1_g2	2557	52.245	10.815	12.185	PREDICTED: LOW QUALITY PROTEIN: uncharacterized protein LOC105052954 [Elaeis guineensis]	------	------	------	------	------	------	------	------	------	------	PF00514.20;PF01602.17	Arm;Adaptin_N	Armadillo/beta-catenin-like repeat;Adaptin N terminal region
TRINITY_DN49206_c4_g1	1202	8.055	0.64	1.24	LOW QUALITY PROTEIN: ABC transporter B family member 20-like [Asparagus officinalis]	GO:0016021;GO:0005524;GO:0042626	CC:integral component of membrane;MF:ATP binding;MF:ATPase activity, coupled to transmembrane movement of substances;	K05658	ABCB1, CD243	map02010	ABC transporters	------	------	gi|75335876|sp|Q9M3B9.1|AB20B_ARATH;	RecName: Full=ABC transporter B family member 20; Short=ABC transporter ABCB.20; Short=AtABCB20; AltName: Full=Multidrug resistance protein 14; AltName: Full=P-glycoprotein 20;	PF00664.20	ABC_membrane	ABC transporter transmembrane region
TRINITY_DN49252_c1_g1	1316	4.57	0.465	0.625	Oxysterol-binding protein-related protein 3B [Dichanthelium oligosanthes]	------	------	------	------	------	------	------	------	gi|75249404|sp|Q93Y40.1|ORP3C_ARATH;	RecName: Full=Oxysterol-binding protein-related protein 3C; AltName: Full=OSBP-related protein 3C;	------	------	------
TRINITY_DN49263_c3_g1	1484	7.445	64.17	48.945		------	------	------	------	------	------	------	------	------	------	------	------	------
TRINITY_DN49330_c1_g3	1027	19.61	0.295	0.72	PREDICTED: diacylglycerol kinase 5-like isoform X2 [Ziziphus jujuba]	------	------	K00901	dgkA, DGK	map00564;map04070;map00561	Glycerophospholipid metabolism;Phosphatidylinositol signaling system;Glycerolipid metabolism	------	------	gi|75168938|sp|Q9C5E5.1|DGK5_ARATH;	RecName: Full=Diacylglycerol kinase 5; Short=AtDGK5; Short=DAG kinase 5; AltName: Full=Diglyceride kinase 5; Short=DGK 5;	------	------	------
TRINITY_DN49333_c6_g1	524	4.22	0	0.615		------	------	------	------	------	------	------	------	------	------	------	------	------
TRINITY_DN49359_c1_g2	635	28.925	6.37	12.58	4-coumarate--CoA ligase-like 7 [Durio zibethinus]	GO:0008152;GO:0008152;GO:0008152;GO:0016021;GO:0016021;GO:0016874;GO:0016874;GO:0016874	BP:metabolic process;BP:metabolic process;BP:metabolic process;CC:integral component of membrane;CC:integral component of membrane;MF:ligase activity;MF:ligase activity;MF:ligase activity;	K01904	4CL	map00940;map00130;map00360	Phenylpropanoid biosynthesis;Ubiquinone and other terpenoid-quinone biosynthesis;Phenylalanine metabolism	------	------	gi|75311763|sp|Q9M0X9.1|4CLL7_ARATH;	RecName: Full=4-coumarate--CoA ligase-like 7; AltName: Full=4-coumarate--CoA ligase isoform 6; Short=At4CL6;	PF13193.3	AMP-binding_C	AMP-binding enzyme C-terminal domain
TRINITY_DN49430_c4_g5	600	0	4.62	0.335		------	------	------	------	------	------	------	------	------	------	------	------	------
TRINITY_DN49432_c1_g2	828	0.655	8.565	4.685		------	------	------	------	------	------	------	------	------	------	------	------	------
TRINITY_DN49464_c1_g2	1994	44.28	7.295	31.465	heat shock protein 81-1 [Dendrobium catenatum]	GO:0006457;GO:0006950;GO:0005524;GO:0051082	BP:protein folding;BP:response to stress;MF:ATP binding;MF:unfolded protein binding;	K04079	HSP90A, htpG	map04626;map04141	Plant-pathogen interaction;Protein processing in endoplasmic reticulum	------	------	gi|75322934|sp|Q69QQ6.1|HSP82_ORYSJ;	RecName: Full=Heat shock protein 81-2; Short=HSP81-2; AltName: Full=Heat shock protein 90;	PF02518.23;PF13589.3;PF00183.15	HATPase_c;HATPase_c_3;HSP90	Histidine kinase-, DNA gyrase B-, and HSP90-like ATPase;Histidine kinase-, DNA gyrase B-, and HSP90-like ATPase;Hsp90 protein
TRINITY_DN49474_c6_g1	2920	0.255	2.595	1.48	PREDICTED: MAR-binding filament-like protein 1 [Elaeis guineensis]	GO:0016021	CC:integral component of membrane;	------	------	------	------	------	------	------	------	PF04582.9	Reo_sigmaC	Reovirus sigma C capsid protein
TRINITY_DN49505_c0_g1	509	0	17.5	1.8		------	------	------	------	------	------	------	------	------	------	------	------	------
TRINITY_DN49509_c5_g1	462	17.715	118.865	127.43	vacuolar-processing enzyme-like [Ananas comosus]	GO:0008233	MF:peptidase activity;	K01369	LGMN	------	------	------	------	gi|1351408|sp|P49043.1|VPE_CITSI;	RecName: Full=Vacuolar-processing enzyme; Short=VPE; Flags: Precursor;	PF01650.15	Peptidase_C13	Peptidase C13 family
TRINITY_DN49527_c3_g3	856	0	1.505	1.165		------	------	------	------	------	------	------	------	------	------	------	------	------
TRINITY_DN49556_c0_g3	798	8.165	0.585	1.3	PREDICTED: receptor-like serine/threonine-protein kinase SD1-8 isoform X1 [Elaeis guineensis]	GO:0048544;GO:0016021;GO:0005524;GO:0004674	BP:recognition of pollen;CC:integral component of membrane;MF:ATP binding;MF:protein serine/threonine kinase activity;	------	------	------	------	------	------	gi|239985410|sp|P17840.2|SLSG3_BRAOL;	RecName: Full=S-locus-specific glycoprotein S13; Short=SLSG-13; Flags: Precursor;	PF00954.17;PF08276.8	S_locus_glycop;PAN_2	S-locus glycoprotein domain;PAN-like domain
TRINITY_DN49568_c2_g2	1781	3.25	0	0.88		------	------	------	------	------	------	------	------	------	------	------	------	------
TRINITY_DN49587_c0_g1	876	20.75	5.39	23.07	hypothetical protein CRG98_005842 [Punica granatum]	GO:0048544;GO:0016021;GO:0016021;GO:0005524;GO:0004674;GO:0005524;GO:0004674	BP:recognition of pollen;CC:integral component of membrane;CC:integral component of membrane;MF:ATP binding;MF:protein serine/threonine kinase activity;MF:ATP binding;MF:protein serine/threonine kinase activity;	K04733	IRAK4	------	------	------	------	gi|75213389|sp|Q9SY89.1|Y1661_ARATH;	RecName: Full=Putative G-type lectin S-receptor-like serine/threonine-protein kinase At1g61610; Flags: Precursor;	PF01453.21;PF00069.22;PF07714.14	B_lectin;Pkinase;Pkinase_Tyr	D-mannose binding lectin;Protein kinase domain;Protein tyrosine kinase
TRINITY_DN49605_c2_g3	677	7.39	28.465	38.18		------	------	------	------	------	------	------	------	------	------	------	------	------
TRINITY_DN49615_c8_g3	1261	0	0.97	0.42		------	------	------	------	------	------	------	------	------	------	------	------	------
TRINITY_DN49626_c6_g2	861	0	6.04	0.825		------	------	------	------	------	------	------	------	------	------	------	------	------
TRINITY_DN49647_c6_g1	2196	0	1.695	3.965		------	------	------	------	------	------	------	------	------	------	------	------	------
TRINITY_DN49649_c5_g1	471	22.15	390.62	454.805	hypothetical protein CRG98_046318 [Punica granatum]	GO:0005739;GO:0016740	CC:mitochondrion;MF:transferase activity;	------	------	------	------	------	------	gi|110816488|sp|Q3BAI2.1|YCX91_PHAAO;	RecName: Full=Uncharacterized protein ORF91;	------	------	------
TRINITY_DN49678_c0_g1	1909	5.125	0.145	0.695	PREDICTED: receptor-like serine/threonine-protein kinase SD1-8 [Phoenix dactylifera]	GO:0048544;GO:0016021;GO:0005524;GO:0004674	BP:recognition of pollen;CC:integral component of membrane;MF:ATP binding;MF:protein serine/threonine kinase activity;	------	------	------	------	------	------	gi|75318808|sp|O81905.1|SD18_ARATH;	RecName: Full=Receptor-like serine/threonine-protein kinase SD1-8; AltName: Full=Arabidopsis thaliana receptor kinase 3; AltName: Full=S-domain-1;	PF00954.17;PF08276.8;PF01453.21;PF07714.14;PF00069.22;PF01636.20	S_locus_glycop;PAN_2;B_lectin;Pkinase_Tyr;Pkinase;APH	S-locus glycoprotein domain;PAN-like domain;D-mannose binding lectin;Protein tyrosine kinase;Protein kinase domain;Phosphotransferase enzyme family
TRINITY_DN49678_c0_g3	937	3.66	0	1.28	PREDICTED: receptor-like serine/threonine-protein kinase SD1-8 isoform X2 [Elaeis guineensis]	GO:0048544;GO:0005524;GO:0004674	BP:recognition of pollen;MF:ATP binding;MF:protein serine/threonine kinase activity;	------	------	------	------	------	------	gi|239985410|sp|P17840.2|SLSG3_BRAOL;	RecName: Full=S-locus-specific glycoprotein S13; Short=SLSG-13; Flags: Precursor;	PF00954.17;PF08276.8;PF01453.21	S_locus_glycop;PAN_2;B_lectin	S-locus glycoprotein domain;PAN-like domain;D-mannose binding lectin
TRINITY_DN49685_c5_g2	616	2.695	108.13	15.805	thaumatin-like protein 1b [Ananas comosus]	------	------	------	------	------	------	------	------	gi|25091405|sp|P83332.1|TLP1_PRUPE;	RecName: Full=Thaumatin-like protein 1; AltName: Full=PpAZ44; Flags: Precursor [Prunus persica];	PF00314.14	Thaumatin	Thaumatin family
TRINITY_DN49688_c1_g4	610	113.74	28.29	66.495	heat shock protein 90.1 [Elymus sibiricus]	GO:0006457;GO:0006950;GO:0006457;GO:0006950;GO:0006457;GO:0006950;GO:0006457;GO:0006950;GO:0005524;GO:0051082;GO:0005524;GO:0051082;GO:0005524;GO:0051082;GO:0005524;GO:0051082	BP:protein folding;BP:response to stress;BP:protein folding;BP:response to stress;BP:protein folding;BP:response to stress;BP:protein folding;BP:response to stress;MF:ATP binding;MF:unfolded protein binding;MF:ATP binding;MF:unfolded protein binding;MF:ATP binding;MF:unfolded protein binding;MF:ATP binding;MF:unfolded protein binding;	K04079	HSP90A, htpG	map04626;map04141	Plant-pathogen interaction;Protein processing in endoplasmic reticulum	------	------	gi|94730392|sp|Q07078.2|HSP83_ORYSJ;	RecName: Full=Heat shock protein 81-3; Short=HSP81-3; AltName: Full=Gravity-specific protein GSC 381;	PF00183.15	HSP90	Hsp90 protein
TRINITY_DN49702_c2_g1	2017	1.595	8.135	5.415	glycerol-3-phosphate 2-O-acyltransferase 6-like [Hevea brasiliensis]	GO:0008152;GO:0008152;GO:0016021;GO:0016021;GO:0016746;GO:0016746	BP:metabolic process;BP:metabolic process;CC:integral component of membrane;CC:integral component of membrane;MF:transferase activity, transferring acyl groups;MF:transferase activity, transferring acyl groups;	------	------	------	------	------	------	gi|71159388|sp|O80437.1|GPAT6_ARATH;	RecName: Full=Glycerol-3-phosphate 2-O-acyltransferase 6; Short=AtGPAT6; AltName: Full=Glycerol-3-phosphate acyltransferase 6;	PF01553.18;PF12710.4	Acyltransferase;HAD	Acyltransferase;haloacid dehalogenase-like hydrolase
TRINITY_DN49731_c0_g2	1967	0	1.33	0.915		------	------	------	------	------	------	------	------	------	------	PF00073.17	Rhv	picornavirus capsid protein
TRINITY_DN49773_c0_g1	2327	51.965	4.45	5.45	U-box domain-containing protein 44-like [Asparagus officinalis]	------	------	------	------	------	------	------	------	gi|75264018|sp|Q9LM76.1|PUB44_ARATH;	RecName: Full=U-box domain-containing protein 44; AltName: Full=Plant U-box protein 44; AltName: Full=Protein SENESCENCE-ASSOCIATED E3 UBIQUITIN LIGASE 1;	PF00514.20;PF12717.4;PF05804.9	Arm;Cnd1;KAP	Armadillo/beta-catenin-like repeat;non-SMC mitotic condensation complex subunit 1;Kinesin-associated protein
TRINITY_DN49774_c4_g2	2800	2.67	26.015	27.405	maternal effect embryo arrest 14, partial [Elaeis guineensis]	GO:0010183;GO:0010183;GO:0036033;GO:0036033	BP:pollen tube guidance;BP:pollen tube guidance;MF:mediator complex binding;MF:mediator complex binding;	------	------	------	------	------	------	gi|75215741|sp|Q9XIM0.1|MEE14_ARATH;	RecName: Full=CCG-binding protein 1; Short=AtCBP1; AltName: Full=Protein MATERNAL EFFECT EMBRYO ARREST 14;	------	------	------
TRINITY_DN49785_c5_g1	1362	0.04	1.52	0.745		------	------	------	------	------	------	------	------	------	------	------	------	------
TRINITY_DN49816_c0_g7	1649	87.335	18.35	18.25	PREDICTED: transcription factor MYC2-like [Elaeis guineensis]	GO:0046983;GO:0046983;GO:0046983	MF:protein dimerization activity;MF:protein dimerization activity;MF:protein dimerization activity;	K13422	MYC2	map04016;map04075	MAPK signaling pathway - plant;Plant hormone signal transduction	------	------	gi|122248973|sp|Q336P5.1|MYC2_ORYSJ;	RecName: Full=Transcription factor MYC2; Short=OsMYC2; AltName: Full=Basic helix-loop-helix protein 9; Short=OsbHLH009; Short=bHLH 9;	PF14215.3;PF00010.23	bHLH-MYC_N;HLH	bHLH-MYC and R2R3-MYB transcription factors N-terminal;Helix-loop-helix DNA-binding domain
TRINITY_DN49837_c0_g2	1569	1.635	0	0.08	uncharacterized protein LOC109712821 [Ananas comosus]	------	------	------	------	------	------	------	------	------	------	PF02992.11;PF13960.3	Transposase_21;DUF4218	Transposase family tnp2;Domain of unknown function
TRINITY_DN49856_c1_g2	700	0.41	5.495	0.38	hypothetical protein VITISV_038988 [Vitis vinifera]	------	------	------	------	------	------	------	------	------	------	------	------	------
TRINITY_DN49868_c0_g2	1958	1.53	0.17	0.43		------	------	------	------	------	------	------	------	------	------	------	------	------
TRINITY_DN49885_c1_g5	1302	93.125	17.505	19.445	PREDICTED: 3-ketoacyl-CoA synthase 4-like [Glycine max]	GO:0006633;GO:0006633;GO:0016021;GO:0016020;GO:0016747;GO:0016747	BP:fatty acid biosynthetic process;BP:fatty acid biosynthetic process;CC:integral component of membrane;CC:membrane;MF:transferase activity, transferring acyl groups other than amino-acyl groups;MF:transferase activity, transferring acyl groups other than amino-acyl groups;	K15397	KCS	map00062	Fatty acid elongation	------	------	gi|75311386|sp|Q9LN49.1|KCS4_ARATH;	RecName: Full=3-ketoacyl-CoA synthase 4; Short=KCS-4; AltName: Full=Very long-chain fatty acid condensing enzyme 4; Short=VLCFA condensing enzyme 4;	PF08392.9;PF08541.7;PF02797.12	FAE1_CUT1_RppA;ACP_syn_III_C;Chal_sti_synt_C	FAE1/Type III polyketide synthase-like protein;3-Oxoacyl-[acyl-carrier-protein;Chalcone and stilbene synthases, C-terminal domain
TRINITY_DN49885_c1_g6	460	8.6	44.675	36.675	PREDICTED: uncharacterized protein LOC105059073 [Elaeis guineensis]	------	------	------	------	------	------	------	------	------	------	PF03760.12	LEA_1	Late embryogenesis abundant
TRINITY_DN49900_c1_g6	909	0	1.85	4.605	Thioredoxin-like protein HCF164, chloroplastic [Apostasia shenzhenica]	GO:0045454;GO:0005623;GO:0009536	BP:cell redox homeostasis;CC:cell;CC:plastid;	------	------	------	------	------	------	gi|464973|sp|P35088.1|TXLA_SYNE7;	RecName: Full=Thiol:disulfide interchange protein TxlA;	PF00085.17	Thioredoxin	Thioredoxin
TRINITY_DN49911_c0_g1	812	6.685	25.505	19.835	PREDICTED: probable receptor-like protein kinase At1g33260 [Musa acuminata subsp. malaccensis]	GO:0016021;GO:0005524;GO:0004674;GO:0005524;GO:0004672;GO:0005524;GO:0004674	CC:integral component of membrane;MF:ATP binding;MF:protein serine/threonine kinase activity;MF:ATP binding;MF:protein kinase activity;MF:ATP binding;MF:protein serine/threonine kinase activity;	------	------	------	------	------	------	gi|817037020|sp|P0DKI6.1|Y1332_ARATH;	RecName: Full=Probable receptor-like protein kinase At1g33260;	PF00069.22;PF07714.14	Pkinase;Pkinase_Tyr	Protein kinase domain;Protein tyrosine kinase
TRINITY_DN49917_c4_g1	1313	13.47	59.75	27.53	LOW QUALITY PROTEIN: probable flavin-containing monooxygenase 1 [Asparagus officinalis]	GO:0050660;GO:0004499;GO:0050661;GO:0050660;GO:0004499;GO:0050661	MF:flavin adenine dinucleotide binding;MF:N,N-dimethylaniline monooxygenase activity;MF:NADP binding;MF:flavin adenine dinucleotide binding;MF:N,N-dimethylaniline monooxygenase activity;MF:NADP binding;	K00485	FMO	------	------	COG2072	P:Inorganic ion transport and metabolism	gi|75174733|sp|Q9LMA1.1|FMO1_ARATH;	RecName: Full=Probable flavin-containing monooxygenase 1;	PF00743.16;PF13738.3;PF13434.3	FMO-like;Pyr_redox_3;K_oxygenase	Flavin-binding monooxygenase-like;Pyridine nucleotide-disulphide oxidoreductase;L-lysine 6-monooxygenase
TRINITY_DN49923_c4_g1	1225	1.645	0	0.635		------	------	------	------	------	------	------	------	------	------	------	------	------
TRINITY_DN49927_c3_g1	1788	122.585	15.235	37.6	PREDICTED: probable calcium-binding protein CML49 [Phoenix dactylifera]	GO:0005509;GO:0005509	MF:calcium ion binding;MF:calcium ion binding;	K13448	CML	map04626	Plant-pathogen interaction	------	------	gi|75331395|sp|Q8W4L0.1|CML49_ARATH;	RecName: Full=Probable calcium-binding protein CML49; AltName: Full=Calmodulin-like protein 49;	PF13202.3;PF00036.29;PF13405.3;PF13499.3	EF-hand_5;EF-hand_1;EF-hand_6;EF-hand_7	EF hand;EF hand;EF-hand domain;EF-hand domain pair
TRINITY_DN49928_c3_g3	1185	27.23	1.68	3.105	uncharacterized protein LOC110019765 [Phalaenopsis equestris]	GO:0016021;GO:0016021;GO:0016021	CC:integral component of membrane;CC:integral component of membrane;CC:integral component of membrane;	------	------	------	------	------	------	------	------	PF08450.9	SGL	SMP-30/Gluconolaconase/LRE-like region
TRINITY_DN49982_c1_g4	356	178.92	38.385	98.91	heat shock protein 81-1 [Sorghum bicolor]	GO:0006457;GO:0006950;GO:0006457;GO:0006950;GO:0006457;GO:0006950;GO:0006457;GO:0006950;GO:0006457;GO:0006950;GO:0005524;GO:0051082;GO:0005524;GO:0051082;GO:0005524;GO:0051082;GO:0005524;GO:0051082;GO:0005524;GO:0051082	BP:protein folding;BP:response to stress;BP:protein folding;BP:response to stress;BP:protein folding;BP:response to stress;BP:protein folding;BP:response to stress;BP:protein folding;BP:response to stress;MF:ATP binding;MF:unfolded protein binding;MF:ATP binding;MF:unfolded protein binding;MF:ATP binding;MF:unfolded protein binding;MF:ATP binding;MF:unfolded protein binding;MF:ATP binding;MF:unfo…	K04079	HSP90A, htpG	map04626;map04141	Plant-pathogen interaction;Protein processing in endoplasmic reticulum	------	------	gi|547683|sp|P36181.1|HSP80_SOLLC;	RecName: Full=Heat shock cognate protein 80;	PF00183.15	HSP90	Hsp90 protein
TRINITY_DN49982_c1_g6	588	40.27	5.94	30.72	heat shock protein 81-1 isoform X1 [Asparagus officinalis]	GO:0006457;GO:0006950;GO:0006457;GO:0006950;GO:0006950;GO:0006457;GO:0005737;GO:0005737;GO:0005524;GO:0051082;GO:0005524;GO:0051082;GO:0051082;GO:0005524	BP:protein folding;BP:response to stress;BP:protein folding;BP:response to stress;BP:response to stress;BP:protein folding;CC:cytoplasm;CC:cytoplasm;MF:ATP binding;MF:unfolded protein binding;MF:ATP binding;MF:unfolded protein binding;MF:unfolded protein binding;MF:ATP binding;	K04079	HSP90A, htpG	map04626;map04141	Plant-pathogen interaction;Protein processing in endoplasmic reticulum	------	------	gi|158513648|sp|A2YWQ1.1|HSP81_ORYSI;	RecName: Full=Heat shock protein 81-1; Short=HSP81-1; AltName: Full=Heat shock protein 82 >gi|158564094|sp|Q0J4P2.2|HSP81_ORYSJ RecName: Full=Heat shock protein 81-1; Short=HSP81-1; AltName: Full=Heat shock protein 82;	PF00183.15	HSP90	Hsp90 protein
TRINITY_DN49995_c2_g5	441	16.3	0.13	11.895		------	------	------	------	------	------	------	------	------	------	------	------	------
TRINITY_DN50041_c10_g1	1455	1.61	0.035	0.09		------	------	------	------	------	------	------	------	------	------	------	------	------
TRINITY_DN50109_c3_g1	1112	0	2.795	1.34		------	------	------	------	------	------	------	------	------	------	------	------	------
TRINITY_DN50120_c6_g1	639	5.52	104.345	3.9	PREDICTED: uncharacterized protein LOC109348691 isoform X1 [Lupinus angustifolius]	------	------	------	------	------	------	------	------	------	------	------	------	------
TRINITY_DN50191_c6_g4	562	0.82	9.58	1.735		------	------	------	------	------	------	------	------	------	------	------	------	------
TRINITY_DN50197_c5_g1	940	10.935	1.07	5.48	uncharacterized protein A4U43_C03F14650 [Asparagus officinalis]	------	------	------	------	------	------	------	------	------	------	------	------	------
TRINITY_DN50215_c0_g1	3015	0.21	1.12	0.61	PREDICTED: uncharacterized protein LOC105053188 isoform X1 [Elaeis guineensis]	GO:0006355;GO:0006355;GO:0006355;GO:0005634;GO:0005634;GO:0005634;GO:0005524;GO:0042393;GO:0005524;GO:0042393;GO:0005524	BP:regulation of transcription, DNA-templated;BP:regulation of transcription, DNA-templated;BP:regulation of transcription, DNA-templated;CC:nucleus;CC:nucleus;CC:nucleus;MF:ATP binding;MF:histone binding;MF:ATP binding;MF:histone binding;MF:ATP binding;	------	------	------	------	------	------	------	------	------	------	------
TRINITY_DN50236_c3_g3	976	20.735	1.475	1.115	PREDICTED: uncharacterized protein LOC105040818 [Elaeis guineensis]	GO:0016021;GO:0016021;GO:0016021;GO:0016021	CC:integral component of membrane;CC:integral component of membrane;CC:integral component of membrane;CC:integral component of membrane;	------	------	------	------	------	------	------	------	PF01925.16	TauE	Sulfite exporter TauE/SafE
TRINITY_DN50285_c0_g1	892	42.215	276.035	136.72	21 kDa protein [Ananas comosus]	GO:0004857;GO:0004857;GO:0004857	MF:enzyme inhibitor activity;MF:enzyme inhibitor activity;MF:enzyme inhibitor activity;	------	------	------	------	------	------	gi|112717|sp|P17407.1|21KD_DAUCA;	RecName: Full=21 kDa protein; AltName: Full=1.2 protein; Flags: Precursor;	PF04043.12	PMEI	Plant invertase/pectin methylesterase inhibitor
TRINITY_DN50309_c3_g2	2392	10.375	50.325	107.715	hypothetical protein AXF42_Ash007869 [Apostasia shenzhenica]	GO:0016021;GO:0016021	CC:integral component of membrane;CC:integral component of membrane;	------	------	------	------	------	------	------	------	PF11460.5	DUF3007	Protein of unknown function
TRINITY_DN50312_c3_g7	1283	10.37	0.875	0.81	heavy metal-associated isoprenylated plant protein 3-like [Asparagus officinalis]	GO:0030001;GO:0046872	BP:metal ion transport;MF:metal ion binding;	------	------	------	------	------	------	gi|75262551|sp|Q9FJH5.1|HIP3_ARATH;	RecName: Full=Heavy metal-associated isoprenylated plant protein 3; Short=AtHIPP3; Flags: Precursor;	PF00403.23	HMA	Heavy-metal-associated domain
TRINITY_DN50317_c0_g6	1603	28.715	5.89	6.13	Cytochrome P450 94A1 [Apostasia shenzhenica]	GO:0016021;GO:0016021;GO:0020037;GO:0005506;GO:0016705;GO:0020037;GO:0005506;GO:0016705	CC:integral component of membrane;CC:integral component of membrane;MF:heme binding;MF:iron ion binding;MF:oxidoreductase activity, acting on paired donors, with incorporation or reduction of molecular oxygen;MF:heme binding;MF:iron ion binding;MF:oxidoreductase activity, acting on paired donors, with incorporation or reduction of molecular oxygen;	------	------	------	------	------	------	gi|75315929|sp|Q9ZUX1.1|C94C1_ARATH;	RecName: Full=Cytochrome P450 94C1;	PF00067.19	p450	Cytochrome P450
TRINITY_DN50324_c1_g4	1038	39.645	177.81	95.645	dnaJ protein homolog 1-like [Asparagus officinalis]	GO:0006457;GO:0006457;GO:0006457;GO:0051082;GO:0051082;GO:0051082	BP:protein folding;BP:protein folding;BP:protein folding;MF:unfolded protein binding;MF:unfolded protein binding;MF:unfolded protein binding;	K09519	DNAJB13	------	------	COG0484	O:Posttranslational modification, protein turnover, chaperones	gi|18202849|sp|Q9D832.1|DNJB4_MOUSE;	RecName: Full=DnaJ homolog subfamily B member 4;	PF01556.15	DnaJ_C	DnaJ C terminal domain
TRINITY_DN50348_c5_g1	659	75.415	14.465	110.88	PREDICTED: UDP-glycosyltransferase 73C6-like [Phoenix dactylifera]	GO:0008152;GO:0008152;GO:0016758;GO:0016758	BP:metabolic process;BP:metabolic process;MF:transferase activity, transferring hexosyl groups;MF:transferase activity, transferring hexosyl groups;	K13496	UGT73C	------	------	------	------	gi|75292641|sp|Q6VAA9.1|U73E1_STERE;	RecName: Full=UDP-glycosyltransferase 73E1;	PF00201.15	UDPGT	UDP-glucoronosyl and UDP-glucosyl transferase
TRINITY_DN50394_c2_g2	894	0.43	6.655	5.975	PREDICTED: non-symbiotic hemoglobin 2-like [Musa acuminata subsp. malaccensis]	GO:0020037;GO:0046872;GO:0019825;GO:0005344;GO:0020037;GO:0046872;GO:0019825;GO:0005344;GO:0020037;GO:0046872;GO:0019825;GO:0005344	MF:heme binding;MF:metal ion binding;MF:oxygen binding;MF:oxygen transporter activity;MF:heme binding;MF:metal ion binding;MF:oxygen binding;MF:oxygen transporter activity;MF:heme binding;MF:metal ion binding;MF:oxygen binding;MF:oxygen transporter activity;	------	------	------	------	COG1018	C:Energy production and conversion	gi|122770|sp|P23244.1|HBP2_CASGL;	RecName: Full=Hemoglobin-2; AltName: Full=Hemoglobin II;	------	------	------
TRINITY_DN50406_c0_g1	1006	8.625	0.795	1	uncharacterized protein LOC107460918 [Arachis duranensis]	------	------	------	------	------	------	------	------	------	------	------	------	------
TRINITY_DN50447_c1_g1	404	1.21	36.115	0.345	LOW QUALITY PROTEIN: heptahelical transmembrane protein ADIPOR1-like [Asparagus officinalis]	------	------	K07297	ADIPOR	------	------	------	------	gi|75163774|sp|Q93ZH9.1|HHP1_ARATH;	RecName: Full=Heptahelical transmembrane protein 1; AltName: Full=PAQR family protein HHP1;	PF03006.17	HlyIII	Haemolysin-III related
TRINITY_DN50476_c3_g3	314	20.34	0	18		------	------	------	------	------	------	------	------	------	------	------	------	------
TRINITY_DN50482_c1_g1	1361	0	1.535	3.685	PREDICTED: protein NRT1/ PTR FAMILY 5.2-like [Elaeis guineensis]	GO:0016021;GO:0016021;GO:0016021;GO:0022857;GO:0022857;GO:0022857	CC:integral component of membrane;CC:integral component of membrane;CC:integral component of membrane;MF:transmembrane transporter activity;MF:transmembrane transporter activity;MF:transmembrane transporter activity;	------	------	------	------	------	------	gi|75171884|sp|Q9FNL7.1|PTR3_ARATH;	RecName: Full=Protein NRT1/ PTR FAMILY 5.2; Short=AtNPF5.2; AltName: Full=Peptide transporter PTR3-A; Short=AtPTR3;	PF00854.18	PTR2	POT family
TRINITY_DN50498_c0_g1	1989	1.36	0.02	0.26		------	------	------	------	------	------	------	------	------	------	------	------	------
TRINITY_DN50576_c0_g2	1155	14.975	1.395	4.8	PREDICTED: receptor-like serine/threonine-protein kinase SD1-8 isoform X1 [Elaeis guineensis]	------	------	------	------	------	------	------	------	gi|75318808|sp|O81905.1|SD18_ARATH;	RecName: Full=Receptor-like serine/threonine-protein kinase SD1-8; AltName: Full=Arabidopsis thaliana receptor kinase 3; AltName: Full=S-domain-1;	PF00954.17;PF08276.8;PF07714.14;PF00069.22	S_locus_glycop;PAN_2;Pkinase_Tyr;Pkinase	S-locus glycoprotein domain;PAN-like domain;Protein tyrosine kinase;Protein kinase domain
TRINITY_DN50582_c1_g1	646	4.535	38.235	5.715	PREDICTED: uncharacterized protein LOC103975117 [Musa acuminata subsp. malaccensis]	------	------	------	------	------	------	------	------	------	------	------	------	------
TRINITY_DN50598_c1_g2	1333	9.105	51.14	19.45	SWEETs [Cymbidium hybrid cultivar]	GO:0008643;GO:0008643;GO:0016021;GO:0005886;GO:0016021;GO:0005886	BP:carbohydrate transport;BP:carbohydrate transport;CC:integral component of membrane;CC:plasma membrane;CC:integral component of membrane;CC:plasma membrane;	K15382	SLC50A, SWEET	------	------	------	------	gi|75125196|sp|Q6K4V2.1|SWET4_ORYSJ;	RecName: Full=Bidirectional sugar transporter SWEET4; Short=OsSWEET4 >gi|322967140|sp|A2X3S3.1|SWET4_ORYSI RecName: Full=Bidirectional sugar transporter SWEET4; Short=OsSWEET4;	PF03083.13	MtN3_slv	Sugar efflux transporter for intercellular exchange
TRINITY_DN50601_c3_g4	1971	12.35	3.44	7.745	L-ascorbate oxidase-like [Asparagus officinalis]	------	------	K00423	E1.10.3.3	map00053	Ascorbate and aldarate metabolism	COG2132	Q:Secondary metabolites biosynthesis, transport and catabolism	gi|2493321|sp|Q40588.1|ASO_TOBAC;	RecName: Full=L-ascorbate oxidase; Short=ASO; Short=Ascorbase; Flags: Precursor;	PF00394.19;PF07731.11;PF07732.12;PF00376.20	Cu-oxidase;Cu-oxidase_2;Cu-oxidase_3;MerR	Multicopper oxidase;Multicopper oxidase;Multicopper oxidase;MerR family regulatory protein
TRINITY_DN50610_c3_g4	508	0.845	10.35	0.285		------	------	------	------	------	------	------	------	------	------	------	------	------
TRINITY_DN50629_c3_g2	960	0	4.79	2.32		------	------	------	------	------	------	------	------	------	------	------	------	------
TRINITY_DN50684_c4_g2	581	31.97	158.765	345.92	vacuolar-processing enzyme-like isoform X2 [Ananas comosus]	GO:0008233;GO:0008233	MF:peptidase activity;MF:peptidase activity;	K01369	LGMN	------	------	------	------	gi|48429177|sp|O24325.1|VPE1_PHAVU;	RecName: Full=Vacuolar-processing enzyme; Short=VPE; AltName: Full=Legumain-like proteinase; Short=LLP; Flags: Precursor;	------	------	------
TRINITY_DN50760_c8_g1	543	148.95	19.575	14.26	PREDICTED: methionine gamma-lyase-like [Musa acuminata subsp. malaccensis]	GO:0016829;GO:0030170;GO:0003824;GO:0030170	MF:lyase activity;MF:pyridoxal phosphate binding;MF:catalytic activity;MF:pyridoxal phosphate binding;	K01761	E4.4.1.11	map00270;map00450	Cysteine and methionine metabolism;Selenocompound metabolism	------	------	gi|75205145|sp|Q9SGU9.1|MGL_ARATH;	RecName: Full=Methionine gamma-lyase; Short=AtMGL; AltName: Full=L-methioninase;	PF01053.17	Cys_Met_Meta_PP	Cys/Met metabolism PLP-dependent enzyme
TRINITY_DN50831_c2_g7	341	416.93	2603.03	356.245	uncharacterized protein A4U43_C10F8480 [Asparagus officinalis]	------	------	------	------	------	------	------	------	------	------	------	------	------
TRINITY_DN50853_c3_g1	820	616.505	4871.92	1091.42	PREDICTED: pectinesterase-like [Musa acuminata subsp. malaccensis]	GO:0042545;GO:0045490;GO:0005618;GO:0005576;GO:0016021;GO:0045330;GO:0004857;GO:0030599	BP:cell wall modification;BP:pectin catabolic process;CC:cell wall;CC:extracellular region;CC:integral component of membrane;MF:aspartyl esterase activity;MF:enzyme inhibitor activity;MF:pectinesterase activity;	K01051	E3.1.1.11	map00040	Pentose and glucuronate interconversions	------	------	gi|2507165|sp|P09607.2|PME21_SOLLC;	RecName: Full=Pectinesterase 2.1; Short=PE 2.1; AltName: Full=Pectin methylesterase 2.1; Flags: Precursor;	PF01095.16	Pectinesterase	Pectinesterase
TRINITY_DN50872_c10_g2	1570	0.035	6.565	0.43	LOW QUALITY PROTEIN: flavanone 7-O-glucoside 2'-O-beta-L-rhamnosyltransferase-like [Asparagus officinalis]	GO:0008152;GO:0008152;GO:0016758;GO:0016758	BP:metabolic process;BP:metabolic process;MF:transferase activity, transferring hexosyl groups;MF:transferase activity, transferring hexosyl groups;	K21354;K13080	UGT94E5;C12RT1	map00941;map00944	Flavonoid biosynthesis;Flavone and flavonol biosynthesis	------	------	gi|378405177|sp|Q8GVE3.2|FLRT_CITMA;	RecName: Full=Flavanone 7-O-glucoside 2''-O-beta-L-rhamnosyltransferase; AltName: Full=1,2 rhamnosyltransferase;	PF00201.15	UDPGT	UDP-glucoronosyl and UDP-glucosyl transferase
TRINITY_DN50874_c4_g1	921	0.035	2.585	10.01		------	------	------	------	------	------	------	------	------	------	------	------	------
TRINITY_DN50883_c4_g2	2163	28.65	0	5.18		------	------	------	------	------	------	------	------	------	------	------	------	------
TRINITY_DN50920_c4_g3	3183	0.155	1.9	0.485		------	------	------	------	------	------	------	------	------	------	------	------	------
TRINITY_DN50942_c6_g1	2618	4.125	0.575	3.425	uncharacterized protein A4U43_C08F32060 [Asparagus officinalis]	GO:0016021;GO:0016021;GO:0005381;GO:0005381	CC:integral component of membrane;CC:integral component of membrane;MF:iron ion transmembrane transporter activity;MF:iron ion transmembrane transporter activity;	------	------	------	------	------	------	gi|75162463|sp|Q8W4E7.1|S40A3_ARATH;	RecName: Full=Solute carrier family 40 member 3, chloroplastic; AltName: Full=Ferroportin-3; AltName: Full=Iron-regulated transporter 3; Short=AtIREG3; AltName: Full=Protein MULTIPLE ANTIBIOTIC RESISTANCE 1; Flags: Precursor;	PF06963.9	FPN1	Ferroportin1
TRINITY_DN50950_c5_g1	3056	6.475	47.325	66.735	PREDICTED: TBCC domain-containing protein 1 [Elaeis guineensis]	GO:0000902;GO:0000902	BP:cell morphogenesis;BP:cell morphogenesis;	K16810	TBCCD1	------	------	------	------	------	------	------	------	------
TRINITY_DN50972_c4_g1	887	14.485	3.19	2.365	NAC transcription factor 29-like, partial [Asparagus officinalis]	GO:0006355;GO:0006351;GO:0006355;GO:0006351;GO:0006355;GO:0006351;GO:0005634;GO:0005634;GO:0005634;GO:0003677;GO:0003677;GO:0003677	BP:regulation of transcription, DNA-templated;BP:transcription, DNA-templated;BP:regulation of transcription, DNA-templated;BP:transcription, DNA-templated;BP:regulation of transcription, DNA-templated;BP:transcription, DNA-templated;CC:nucleus;CC:nucleus;CC:nucleus;MF:DNA binding;MF:DNA binding;MF:DNA binding;	------	------	------	------	------	------	gi|425936383|sp|A0SPJ6.1|NAMB2_TRITD;	RecName: Full=NAC transcription factor NAM-B2; Short=TtNAM-B2;	PF02365.12	NAM	No apical meristem
TRINITY_DN50993_c4_g1	1023	2.005	0.085	0.205		------	------	------	------	------	------	------	------	------	------	------	------	------
TRINITY_DN51049_c1_g2	1622	1.64	0.08	1.49		------	------	------	------	------	------	------	------	------	------	------	------	------
TRINITY_DN51115_c5_g2	1226	256.635	20.53	55.035		------	------	------	------	------	------	------	------	------	------	------	------	------
TRINITY_DN51122_c1_g1	2487	20.505	4.165	5.98	extra-large guanine nucleotide-binding protein 3 isoform X3 [Asparagus officinalis]	GO:0007186;GO:0007186;GO:0031683;GO:0005525;GO:0003924;GO:0004871;GO:0031683;GO:0005525;GO:0003924;GO:0004871	BP:G-protein coupled receptor signaling pathway;BP:G-protein coupled receptor signaling pathway;MF:G-protein beta/gamma-subunit complex binding;MF:GTP binding;MF:GTPase activity;MF:signal transducer activity;MF:G-protein beta/gamma-subunit complex binding;MF:GTP binding;MF:GTPase activity;MF:signal transducer activity;	------	------	------	------	------	------	gi|75168876|sp|Q9C516.1|XLG3_ARATH;	RecName: Full=Extra-large guanine nucleotide-binding protein 3; AltName: Full=Extra-large GTP-binding protein 3; Short=Extra-large G-protein 3;	PF00503.17	G-alpha	G-protein alpha subunit
TRINITY_DN51172_c1_g1	2511	13.08	1.075	5.625	uncharacterized protein LOC110635701 isoform X2 [Hevea brasiliensis]	------	------	------	------	------	------	------	------	gi|32699718|sp|Q9CM71.1|TOLB_PASMU;	RecName: Full=Protein TolB; Flags: Precursor;	PF00930.18	DPPIV_N	Dipeptidyl peptidase IV
TRINITY_DN51198_c4_g1	421	0.98	38.025	1.525		------	------	------	------	------	------	------	------	------	------	------	------	------
TRINITY_DN51218_c1_g1	4327	14.6	1.715	5.405	uncharacterized protein LOC109837026 [Asparagus officinalis]	GO:0009536;GO:0009536;GO:0009536;GO:0005509;GO:0005509;GO:0005509	CC:plastid;CC:plastid;CC:plastid;MF:calcium ion binding;MF:calcium ion binding;MF:calcium ion binding;	------	------	------	------	------	------	------	------	------	------	------
TRINITY_DN51219_c8_g1	533	0.93	8.575	2.465		------	------	------	------	------	------	------	------	------	------	------	------	------
TRINITY_DN51230_c4_g1	936	27.605	3.37	5.55	LOW QUALITY PROTEIN: receptor-like protein kinase HAIKU2 [Asparagus officinalis]	GO:0016021;GO:0005524;GO:0004674	CC:integral component of membrane;MF:ATP binding;MF:protein serine/threonine kinase activity;	------	------	------	------	------	------	gi|75273596|sp|Q9LJM4.1|IKU2_ARATH;	RecName: Full=Receptor-like protein kinase HAIKU2; Flags: Precursor;	PF00069.22;PF07714.14	Pkinase;Pkinase_Tyr	Protein kinase domain;Protein tyrosine kinase
TRINITY_DN51245_c9_g3	885	0.295	3.705	6.445	PREDICTED: dirigent protein 22-like [Vigna angularis]	GO:0048046;GO:0048046;GO:0048046	CC:apoplast;CC:apoplast;CC:apoplast;	------	------	------	------	------	------	gi|75148213|sp|Q84TH6.1|DIR23_ARATH;	RecName: Full=Dirigent protein 23; Short=AtDIR23; Flags: Precursor;	PF03018.11	Dirigent	Dirigent-like protein
TRINITY_DN51253_c0_g4	1083	0	1.395	0.46		------	------	------	------	------	------	------	------	------	------	------	------	------
TRINITY_DN51279_c2_g1	798	0	5.355	0.3	leucine rich protein [Arachis hypogaea]	------	------	------	------	------	------	------	------	------	------	------	------	------
TRINITY_DN51296_c4_g1	837	1.595	0	0.72		------	------	------	------	------	------	------	------	------	------	------	------	------
TRINITY_DN51336_c1_g1	586	0	4.85	1.44		------	------	------	------	------	------	------	------	------	------	------	------	------
TRINITY_DN51350_c0_g1	893	77.47	17.365	44.625	calmodulin-binding receptor-like cytoplasmic kinase 2 [Prunus avium]	GO:0005524;GO:0004674	MF:ATP binding;MF:protein serine/threonine kinase activity;	K04733	IRAK4	------	------	------	------	gi|75331192|sp|Q8VZJ9.1|CRCK2_ARATH;	RecName: Full=Calmodulin-binding receptor-like cytoplasmic kinase 2;	PF00069.22;PF07714.14	Pkinase;Pkinase_Tyr	Protein kinase domain;Protein tyrosine kinase
TRINITY_DN51351_c0_g1	4363	55.62	12.32	13.63	heat stress transcription factor A-3-like isoform X1 [Asparagus officinalis]	------	------	K09419	HSFF	------	------	------	------	gi|75259113|sp|Q6H6Q7.1|HSFA3_ORYSJ;	RecName: Full=Heat stress transcription factor A-3; AltName: Full=Heat stress transcription factor 7; Short=OsHsf-07;	------	------	------
TRINITY_DN51378_c3_g2	1173	11.6	2.645	4.05	PREDICTED: putative cis-zeatin O-glucosyltransferase [Elaeis guineensis]	GO:0008152;GO:0008152;GO:0016758;GO:0016758	BP:metabolic process;BP:metabolic process;MF:transferase activity, transferring hexosyl groups;MF:transferase activity, transferring hexosyl groups;	K13495	CISZOG	map00908	Zeatin biosynthesis	------	------	gi|57012705|sp|Q8RXA5.1|CZOG2_MAIZE;	RecName: Full=Cis-zeatin O-glucosyltransferase 2; Short=cisZOG2;	------	------	------
TRINITY_DN51421_c1_g2	442	30.26	1.29	4.385	RNA polymerase sigma factor sigE, chloroplastic/mitochondrial [Medicago truncatula]	GO:0071483;GO:0071472;GO:0009658;GO:0006352;GO:0009553;GO:0010207;GO:0045893;GO:0010218;GO:0010114;GO:0006352;GO:0006352;GO:0006352;GO:0005739;GO:0003700;GO:0001053;GO:0003700;GO:0003700;GO:0003700	BP:cellular response to blue light;BP:cellular response to salt stress;BP:chloroplast organization;BP:DNA-templated transcription, initiation;BP:embryo sac development;BP:photosystem II assembly;BP:positive regulation of transcription, DNA-templated;BP:response to far red light;BP:response to red light;BP:DNA-templated transcription, initiation;BP:DNA-templated transcription, initiation;BP:DNA-te…	K03093	SIGMA70	------	------	------	------	------	------	------	------	------
TRINITY_DN51421_c2_g1	664	9.795	0	2.88	Auxin-induced protein X10A [Apostasia shenzhenica]	GO:0009733;GO:0009733;GO:0009733	BP:response to auxin;BP:response to auxin;BP:response to auxin;	K14488	SAUR	map04075	Plant hormone signal transduction	------	------	gi|75205112|sp|Q9SGU2.1|SAU71_ARATH;	RecName: Full=Auxin-responsive protein SAUR71; AltName: Full=Protein SMALL AUXIN UP RNA 71;	PF02519.11	Auxin_inducible	Auxin responsive protein
TRINITY_DN51427_c1_g2	1890	1.94	0.17	0.665	PREDICTED: L-type lectin-domain containing receptor kinase IV.1-like [Elaeis guineensis]	------	------	------	------	------	------	------	------	gi|75318718|sp|O80939.1|LRK41_ARATH;	RecName: Full=L-type lectin-domain containing receptor kinase IV.1; Short=Arabidopsis thaliana lectin-receptor kinase e; Short=AthlecRK-e; Short=LecRK-IV.1; AltName: Full=Lectin Receptor Kinase 1; Flags: Precursor;	PF00139.16;PF00069.22;PF07714.14	Lectin_legB;Pkinase;Pkinase_Tyr	Legume lectin domain;Protein kinase domain;Protein tyrosine kinase
TRINITY_DN51536_c6_g3	3128	0.045	1.105	0.525		------	------	------	------	------	------	------	------	------	------	------	------	------
TRINITY_DN51538_c0_g1	1681	0.05	3.705	4.51	PREDICTED: alpha-L-arabinofuranosidase 1 [Ricinus communis]	GO:0046373;GO:0046373;GO:0046373;GO:0046373;GO:0009505;GO:0046556;GO:0046556;GO:0046556;GO:0046556	BP:L-arabinose metabolic process;BP:L-arabinose metabolic process;BP:L-arabinose metabolic process;BP:L-arabinose metabolic process;CC:plant-type cell wall;MF:alpha-L-arabinofuranosidase activity;MF:alpha-L-arabinofuranosidase activity;MF:alpha-L-arabinofuranosidase activity;MF:alpha-L-arabinofuranosidase activity;	K01209	abfA	map00520	Amino sugar and nucleotide sugar metabolism	------	------	gi|75265802|sp|Q9SG80.1|ASD1_ARATH;	RecName: Full=Alpha-L-arabinofuranosidase 1; Short=AtASD1; AltName: Full=Beta-D-xylosidase; Flags: Precursor;	------	------	------
TRINITY_DN51558_c3_g3	643	10.24	0.73	6.685	LEAF RUST 10 DISEASE-RESISTANCE LOCUS RECEPTOR-LIKE PROTEIN KINASE-like 2.1 [Asparagus officinalis]	GO:0016021;GO:0005524;GO:0030247;GO:0004714	CC:integral component of membrane;MF:ATP binding;MF:polysaccharide binding;MF:transmembrane receptor protein tyrosine kinase activity;	------	------	------	------	------	------	------	------	------	------	------
TRINITY_DN51629_c1_g4	2052	6.34	20.62	28.56	PREDICTED: auxin-responsive protein IAA10-like [Phoenix dactylifera]	GO:0009734;GO:0006355;GO:0006351;GO:0005634	BP:auxin-activated signaling pathway;BP:regulation of transcription, DNA-templated;BP:transcription, DNA-templated;CC:nucleus;	K14484	IAA	map04075	Plant hormone signal transduction	------	------	gi|148839536|sp|A2XB18.2|IAA10_ORYSI;	RecName: Full=Auxin-responsive protein IAA10; AltName: Full=Indoleacetic acid-induced protein 10;	PF02309.13	AUX_IAA	AUX/IAA family
TRINITY_DN51641_c3_g2	499	0	4.44	4.575		------	------	------	------	------	------	------	------	------	------	------	------	------
TRINITY_DN51664_c0_g3	1414	0.51	4.42	1.745		------	------	------	------	------	------	------	------	------	------	------	------	------
TRINITY_DN51682_c3_g1	1433	2.82	0.225	0.485	Heat shock cognate 70 kDa protein [Ananas comosus]	GO:0016021;GO:0005524;GO:0005524;GO:0005524	CC:integral component of membrane;MF:ATP binding;MF:ATP binding;MF:ATP binding;	K03283	HSPA1_8	map04144;map04141;map03040	Endocytosis;Protein processing in endoplasmic reticulum;Spliceosome	------	------	gi|123620|sp|P27322.1|HSP72_SOLLC;	RecName: Full=Heat shock cognate 70 kDa protein 2;	------	------	------
TRINITY_DN51706_c4_g10	756	0	2.82	0.935		------	------	------	------	------	------	------	------	------	------	------	------	------
TRINITY_DN51714_c1_g1	2220	13.54	3.18	4.47		------	------	------	------	------	------	------	------	------	------	------	------	------
TRINITY_DN51717_c3_g2	602	88.135	12.495	9.705		------	------	------	------	------	------	------	------	------	------	------	------	------
TRINITY_DN51735_c2_g1	1063	0.595	9.085	0.67	LOW QUALITY PROTEIN: uncharacterized protein LOC109839712 [Asparagus officinalis]	GO:0016021;GO:0016021	CC:integral component of membrane;CC:integral component of membrane;	------	------	------	------	------	------	------	------	PF05512.8	AWPM-19	AWPM-19-like family
TRINITY_DN51749_c0_g1	1247	0.7	24.45	0.26		------	------	------	------	------	------	------	------	------	------	------	------	------
TRINITY_DN51759_c1_g5	1468	0	9.75	10.14	PREDICTED: 50S ribosomal protein L4-like [Phoenix dactylifera]	GO:0006412;GO:0006412;GO:0006412;GO:0005840;GO:0005840;GO:0005840;GO:0003735;GO:0003735;GO:0003735	BP:translation;BP:translation;BP:translation;CC:ribosome;CC:ribosome;CC:ribosome;MF:structural constituent of ribosome;MF:structural constituent of ribosome;MF:structural constituent of ribosome;	K02926	RP-L4, MRPL4, rplD	map03010	Ribosome	------	------	gi|81599118|sp|Q5PA59.1|RL4_ANAMM;	RecName: Full=50S ribosomal protein L4 >gi|254803710|sp|B9KJ69.1|RL4_ANAMF RecName: Full=50S ribosomal protein L4;	PF00573.19	Ribosomal_L4	Ribosomal protein L4/L1 family
TRINITY_DN51802_c1_g1	1002	0	4.72	1.91		------	------	------	------	------	------	------	------	------	------	------	------	------
TRINITY_DN51806_c4_g2	1473	0.96	5.015	9.48	PREDICTED: two-component response regulator-like APRR9 isoform X3 [Elaeis guineensis]	GO:0000160;GO:0000160;GO:0005634;GO:0005634	BP:phosphorelay signal transduction system;BP:phosphorelay signal transduction system;CC:nucleus;CC:nucleus;	K12130	PRR5	map04712	Circadian rhythm - plant	------	------	gi|68565887|sp|Q689G6.1|PRR95_ORYSJ;	RecName: Full=Two-component response regulator-like PRR95; AltName: Full=Pseudo-response regulator 95; Short=OsPRR95;	PF06203.11	CCT	CCT motif
TRINITY_DN51813_c4_g1	2573	6.585	46.155	21.03	unspecific 9/13 divinyl ether synthase [Allium sativum]	GO:0020037;GO:0005506;GO:0004497;GO:0016705;GO:0020037;GO:0005506;GO:0016705	MF:heme binding;MF:iron ion binding;MF:monooxygenase activity;MF:oxidoreductase activity, acting on paired donors, with incorporation or reduction of molecular oxygen;MF:heme binding;MF:iron ion binding;MF:oxidoreductase activity, acting on paired donors, with incorporation or reduction of molecular oxygen;	K01723	AOS	map00592	alpha-Linolenic acid metabolism	------	------	gi|1027923587|sp|K4BV52.1|AOS1_SOLLC;	RecName: Full=Allene oxide synthase 1, chloroplastic; Short=LeAOS1; AltName: Full=Cytochrome P450 74A; Flags: Precursor;	PF00067.19	p450	Cytochrome P450
TRINITY_DN51829_c6_g1	480	0	4.685	9.95		------	------	------	------	------	------	------	------	------	------	------	------	------
TRINITY_DN51838_c4_g1	1364	0	3.26	6.73	putative F-box protein At1g50870 [Asparagus officinalis]	------	------	------	------	------	------	------	------	------	------	PF08268.9;PF00646.30;PF12937.4	FBA_3;F-box;F-box-like	F-box associated domain;F-box domain;F-box-like
TRINITY_DN51844_c4_g1	3020	13.74	0.08	0.945	PREDICTED: uncharacterized protein LOC103984445 [Musa acuminata subsp. malaccensis]	GO:0016021	CC:integral component of membrane;	------	------	------	------	------	------	------	------	------	------	------
TRINITY_DN51894_c2_g5	2647	2.93	0.145	0.185	hypothetical protein AXF42_Ash008478 [Apostasia shenzhenica]	GO:0016021;GO:0016021;GO:0016021;GO:0016021	CC:integral component of membrane;CC:integral component of membrane;CC:integral component of membrane;CC:integral component of membrane;	------	------	------	------	------	------	------	------	------	------	------
TRINITY_DN51951_c2_g1	1976	0.37	7.895	2.945	uncharacterized protein LOC109839993 [Asparagus officinalis]	GO:0005634;GO:0005634	CC:nucleus;CC:nucleus;	------	------	------	------	------	------	gi|17433022|sp|Q39057.1|CONS_ARATH;	RecName: Full=Zinc finger protein CONSTANS;	PF06203.11	CCT	CCT motif
TRINITY_DN51953_c3_g7	497	0.225	7.275	0.38		------	------	------	------	------	------	------	------	------	------	------	------	------
TRINITY_DN51965_c0_g1	1078	8.57	0.79	1.55	PREDICTED: small heat shock protein, chloroplastic-like isoform X2 [Elaeis guineensis]	------	------	K13993	HSP20	map04141	Protein processing in endoplasmic reticulum	------	------	gi|123564|sp|P11890.1|HS23C_OXYRB;	RecName: Full=Small heat shock protein, chloroplastic; Flags: Precursor;	PF00011.18	HSP20	Hsp20/alpha crystallin family
TRINITY_DN51972_c2_g5	1165	2.09	0.205	0.095		------	------	------	------	------	------	------	------	------	------	------	------	------
TRINITY_DN52021_c13_g4	1165	16.96	0.16	0.585	PREDICTED: 7-deoxyloganetin glucosyltransferase-like [Musa acuminata subsp. malaccensis]	------	------	K21374	UGT85A	------	------	------	------	gi|678019172|sp|F8WKW1.1|UGT2_GARJA;	RecName: Full=7-deoxyloganetin glucosyltransferase; AltName: Full=Genipin glucosyltransferase; AltName: Full=UDP-glucose glucosyltransferase 2; Short=GjUGT2; AltName: Full=UDP-glycosyltransferase 85A24;	PF00201.15	UDPGT	UDP-glucoronosyl and UDP-glucosyl transferase
TRINITY_DN52026_c0_g1	1452	7.715	1.12	7.15	PREDICTED: leucine-rich repeat receptor-like serine/threonine/tyrosine-protein kinase SOBIR1 [Elaeis guineensis]	GO:0016021;GO:0005524;GO:0004672;GO:0005524;GO:0004672	CC:integral component of membrane;MF:ATP binding;MF:protein kinase activity;MF:ATP binding;MF:protein kinase activity;	------	------	------	------	------	------	gi|75265989|sp|Q9SKB2.1|SBIR1_ARATH;	RecName: Full=Leucine-rich repeat receptor-like serine/threonine/tyrosine-protein kinase SOBIR1; AltName: Full=Protein EVERSHED; AltName: Full=Protein SUPPRESSOR OF BIR1-1; Flags: Precursor;	PF00069.22;PF07714.14	Pkinase;Pkinase_Tyr	Protein kinase domain;Protein tyrosine kinase
TRINITY_DN52045_c1_g1	628	0	2.82	0.185		------	------	------	------	------	------	------	------	------	------	------	------	------
TRINITY_DN52049_c1_g2	918	38.915	7.86	14.51		------	------	------	------	------	------	------	------	------	------	PF00847.17	AP2	AP2 domain
TRINITY_DN52060_c1_g3	1082	10.62	0.375	2.435		------	------	------	------	------	------	------	------	------	------	------	------	------
TRINITY_DN52061_c1_g1	850	12.415	0.78	4.735	PREDICTED: receptor-like serine/threonine-protein kinase SD1-8 [Elaeis guineensis]	GO:0048544;GO:0016021;GO:0005524;GO:0004674	BP:recognition of pollen;CC:integral component of membrane;MF:ATP binding;MF:protein serine/threonine kinase activity;	------	------	------	------	------	------	gi|75319440|sp|Q39086.1|SD17_ARATH;	RecName: Full=Receptor-like serine/threonine-protein kinase SD1-7; AltName: Full=Arabidopsis thaliana receptor kinase 1; AltName: Full=S-domain-1;	PF07714.14;PF11883.5;PF00069.22	Pkinase_Tyr;DUF3403;Pkinase	Protein tyrosine kinase;Domain of unknown function;Protein kinase domain
TRINITY_DN52061_c1_g2	1387	0.04	4.28	8.235	PREDICTED: receptor-like serine/threonine-protein kinase SD1-8 [Phoenix dactylifera]	GO:0048544;GO:0048544;GO:0016021;GO:0016021;GO:0005524;GO:0004674;GO:0005524;GO:0004674	BP:recognition of pollen;BP:recognition of pollen;CC:integral component of membrane;CC:integral component of membrane;MF:ATP binding;MF:protein serine/threonine kinase activity;MF:ATP binding;MF:protein serine/threonine kinase activity;	------	------	------	------	------	------	gi|75319440|sp|Q39086.1|SD17_ARATH;	RecName: Full=Receptor-like serine/threonine-protein kinase SD1-7; AltName: Full=Arabidopsis thaliana receptor kinase 1; AltName: Full=S-domain-1;	PF07714.14;PF00069.22;PF11883.5	Pkinase_Tyr;Pkinase;DUF3403	Protein tyrosine kinase;Protein kinase domain;Domain of unknown function
TRINITY_DN52063_c1_g1	2796	8.235	0.075	0.23	hypothetical protein VITISV_017285 [Vitis vinifera]	GO:0015074;GO:0015074;GO:0015074;GO:0015074;GO:0003676;GO:0003676;GO:0008270;GO:0003676;GO:0003676	BP:DNA integration;BP:DNA integration;BP:DNA integration;BP:DNA integration;MF:nucleic acid binding;MF:nucleic acid binding;MF:zinc ion binding;MF:nucleic acid binding;MF:nucleic acid binding;	------	------	------	------	------	------	gi|130582|sp|P10978.1|POLX_TOBAC;	RecName: Full=Retrovirus-related Pol polyprotein from transposon TNT 1-94; Includes: RecName: Full=Protease; Includes: RecName: Full=Reverse transcriptase; Includes: RecName: Full=Endonuclease;	PF14223.3;PF00665.23	Retrotran_gag_2;rve	gag-polypeptide of LTR copia-type;Integrase core domain
TRINITY_DN52077_c2_g1	1924	0.055	2.065	6.2		------	------	------	------	------	------	------	------	------	------	------	------	------
TRINITY_DN52079_c4_g1	669	0	13.215	2.705		------	------	------	------	------	------	------	------	------	------	------	------	------
TRINITY_DN52093_c4_g4	1207	0	5.695	3.125	Protein trichome birefringence-like 33, partial [Dichanthelium oligosanthes]	GO:0016021;GO:0016021	CC:integral component of membrane;CC:integral component of membrane;	------	------	------	------	------	------	gi|586946307|sp|F4IH21.1|TBL33_ARATH;	RecName: Full=Protein trichome birefringence-like 33;	PF13839.3	PC-Esterase	GDSL/SGNH-like Acyl-Esterase family found in Pmr5 and Cas1p
TRINITY_DN52098_c0_g2	957	9.64	0.535	3.825	uncharacterized protein A4U43_C04F9820 [Asparagus officinalis]	------	------	------	------	------	------	------	------	gi|264664489|sp|C0LGP4.1|Y3475_ARATH;	RecName: Full=Probable LRR receptor-like serine/threonine-protein kinase At3g47570; Flags: Precursor;	PF12799.4;PF13855.3	LRR_4;LRR_8	Leucine Rich repeats;Leucine rich repeat
TRINITY_DN52105_c1_g2	462	0.245	19.145	106.83	PREDICTED: uncharacterized protein LOC105054116 isoform X2 [Elaeis guineensis]	------	------	------	------	------	------	------	------	------	------	------	------	------
TRINITY_DN52134_c0_g1	1524	8.52	3.335	7.925	PREDICTED: alkane hydroxylase MAH1-like [Elaeis guineensis]	GO:0020037;GO:0005506;GO:0004497;GO:0016705;GO:0020037;GO:0005506;GO:0004497;GO:0016705	MF:heme binding;MF:iron ion binding;MF:monooxygenase activity;MF:oxidoreductase activity, acting on paired donors, with incorporation or reduction of molecular oxygen;MF:heme binding;MF:iron ion binding;MF:monooxygenase activity;MF:oxidoreductase activity, acting on paired donors, with incorporation or reduction of molecular oxygen;	------	------	------	------	------	------	gi|75309839|sp|Q9FVS9.1|C96AF_ARATH;	RecName: Full=Alkane hydroxylase MAH1; AltName: Full=Cytochrome P450 96A15; AltName: Full=Protein MID-CHAIN ALKANE HYDROXYLASE 1;	PF00067.19	p450	Cytochrome P450
TRINITY_DN52144_c3_g3	909	1.76	0	1.225		------	------	------	------	------	------	------	------	------	------	------	------	------
TRINITY_DN52158_c1_g1	805	8.235	1.42	1.76		------	------	------	------	------	------	------	------	------	------	------	------	------
TRINITY_DN52158_c2_g1	1710	95.78	21.33	19.46	PREDICTED: probable sarcosine oxidase [Phoenix dactylifera]	GO:0016491;GO:0016491	MF:oxidoreductase activity;MF:oxidoreductase activity;	K00306	PIPOX	map04146;map00310;map00260	Peroxisome;Lysine degradation;Glycine, serine and threonine metabolism	------	------	gi|20139956|sp|Q9SJA7.1|SOX_ARATH;	RecName: Full=Probable sarcosine oxidase;	PF01266.21;PF13450.3;PF12831.4;PF01134.19;PF07992.11;PF03486.11;PF00890.21	DAO;NAD_binding_8;FAD_oxidored;GIDA;Pyr_redox_2;HI0933_like;FAD_binding_2	FAD dependent oxidoreductase;NA;FAD dependent oxidoreductase;Glucose inhibited division protein A;Pyridine nucleotide-disulphide oxidoreductase;HI0933-like protein;FAD binding domain
TRINITY_DN52182_c7_g1	2097	1.84	11.62	8.895	PREDICTED: LOW QUALITY PROTEIN: ammonium transporter 1 member 3-like [Phoenix dactylifera]	GO:0016021;GO:0008519	CC:integral component of membrane;MF:ammonium transmembrane transporter activity;	K03320	amt, AMT, MEP	------	------	------	------	gi|22001522|sp|Q9FVN0.1|AMT13_SOLLC;	RecName: Full=Ammonium transporter 1 member 3; AltName: Full=LeAMT1;3;	PF00909.18	Ammonium_transp	Ammonium Transporter Family
TRINITY_DN52191_c4_g4	946	6.78	0.42	0.85		------	------	------	------	------	------	------	------	------	------	------	------	------
TRINITY_DN52203_c2_g1	1868	7.335	0.275	0.825	PREDICTED: receptor-like serine/threonine-protein kinase SD1-8 [Phoenix dactylifera]	GO:0048544;GO:0016021;GO:0005524;GO:0004674	BP:recognition of pollen;CC:integral component of membrane;MF:ATP binding;MF:protein serine/threonine kinase activity;	------	------	------	------	------	------	gi|75318808|sp|O81905.1|SD18_ARATH;	RecName: Full=Receptor-like serine/threonine-protein kinase SD1-8; AltName: Full=Arabidopsis thaliana receptor kinase 3; AltName: Full=S-domain-1;	PF01453.21;PF00954.17;PF08276.8;PF07714.14;PF00069.22	B_lectin;S_locus_glycop;PAN_2;Pkinase_Tyr;Pkinase	D-mannose binding lectin;S-locus glycoprotein domain;PAN-like domain;Protein tyrosine kinase;Protein kinase domain
TRINITY_DN52204_c10_g2	1082	1.56	0	0.445	EF_hand_5 domain-containing protein [Cephalotus follicularis]	GO:0005509	MF:calcium ion binding;	K13448	CML	map04626	Plant-pathogen interaction	------	------	gi|75335337|sp|Q9LQN4.1|CML17_ARATH;	RecName: Full=Probable calcium-binding protein CML17; AltName: Full=Calmodulin-like protein 17;	PF13405.3;PF00036.29;PF13202.3;PF13499.3	EF-hand_6;EF-hand_1;EF-hand_5;EF-hand_7	EF-hand domain;EF hand;EF hand;EF-hand domain pair
TRINITY_DN52237_c1_g2	1186	94.34	11.74	83.665	PREDICTED: tuliposide A-converting enzyme 2, chloroplastic-like [Elaeis guineensis]	GO:0008152;GO:0016787	BP:metabolic process;MF:hydrolase activity;	------	------	------	------	------	------	gi|75337806|sp|Q9SX78.1|CXE2_ARATH;	RecName: Full=Probable carboxylesterase 2; AltName: Full=AtCXE2;	PF07859.10;PF00135.25;PF10503.6	Abhydrolase_3;COesterase;Esterase_phd	alpha/beta hydrolase fold;Carboxylesterase family;Esterase PHB depolymerase
TRINITY_DN52251_c4_g3	847	0.04	6.705	1.615		------	------	------	------	------	------	------	------	------	------	------	------	------
TRINITY_DN52312_c2_g1	694	86.62	9.435	8.075	PREDICTED: glutathione S-transferase U17-like [Phoenix dactylifera]	GO:0016740;GO:0016740;GO:0016740	MF:transferase activity;MF:transferase activity;MF:transferase activity;	K00799	GST, gst	map00480	Glutathione metabolism	------	------	gi|75334347|sp|Q9FUS9.1|GSTUI_ARATH;	RecName: Full=Glutathione S-transferase U18; Short=AtGSTU18; AltName: Full=GST class-tau member 18; AltName: Full=Glutathione S-transferase 29;	PF00043.22;PF13410.3;PF14497.3	GST_C;GST_C_2;GST_C_3	Glutathione S-transferase, C-terminal domain;Glutathione S-transferase, C-terminal domain;Glutathione S-transferase, C-terminal domain
TRINITY_DN52329_c3_g2	1397	6.355	0.24	0.22		------	------	------	------	------	------	------	------	------	------	------	------	------
TRINITY_DN52346_c2_g1	1072	0.66	15.315	7.125	PREDICTED: uncharacterized protein LOC103977175 isoform X1 [Musa acuminata subsp. malaccensis]	------	------	------	------	------	------	------	------	------	------	------	------	------
TRINITY_DN52366_c5_g1	1938	0.85	4.4	0.95	PREDICTED: UDP-glycosyltransferase 73B4-like [Phoenix dactylifera]	GO:0008152;GO:0008152;GO:0008152;GO:0016758;GO:0016758;GO:0016758	BP:metabolic process;BP:metabolic process;BP:metabolic process;MF:transferase activity, transferring hexosyl groups;MF:transferase activity, transferring hexosyl groups;MF:transferase activity, transferring hexosyl groups;	------	------	------	------	------	------	gi|75308024|sp|Q9AT54.1|SCGT_TOBAC;	RecName: Full=Scopoletin glucosyltransferase; AltName: Full=Phenylpropanoid:glucosyltransferase 1;	PF00201.15	UDPGT	UDP-glucoronosyl and UDP-glucosyl transferase
TRINITY_DN52400_c0_g1	1939	0.09	4.535	0.01	PREDICTED: probable polyol transporter 6 [Phoenix dactylifera]	GO:0016021;GO:0022857	CC:integral component of membrane;MF:transmembrane transporter activity;	------	------	------	------	------	------	gi|118573109|sp|Q8GXR2.2|PLT6_ARATH;	RecName: Full=Probable polyol transporter 6;	PF00083.21;PF07690.13;PF06609.10	Sugar_tr;MFS_1;TRI12	Sugar;Major Facilitator Superfamily;Fungal trichothecene efflux pump
TRINITY_DN52405_c1_g1	764	9.77	0.3	1.04	receptor-like serine/threonine-protein kinase SD1-8 [Asparagus officinalis]	------	------	------	------	------	------	------	------	gi|75319440|sp|Q39086.1|SD17_ARATH;	RecName: Full=Receptor-like serine/threonine-protein kinase SD1-7; AltName: Full=Arabidopsis thaliana receptor kinase 1; AltName: Full=S-domain-1;	PF07714.14;PF00069.22;PF11883.5	Pkinase_Tyr;Pkinase;DUF3403	Protein tyrosine kinase;Protein kinase domain;Domain of unknown function
TRINITY_DN52405_c2_g1	773	32.205	5.215	33.505		------	------	------	------	------	------	------	------	------	------	PF00270.26	DEAD	DEAD/DEAH box helicase
TRINITY_DN52414_c4_g1	563	39.28	6.315	15.29	RecName: Full=Protein TIFY 10b	GO:0006355;GO:0006351;GO:1903507;GO:0031347;GO:2000022;GO:0006355;GO:0009611;GO:0006351;GO:0005634;GO:0003714	BP:regulation of transcription, DNA-templated;BP:transcription, DNA-templated;BP:negative regulation of nucleic acid-templated transcription;BP:regulation of defense response;BP:regulation of jasmonic acid mediated signaling pathway;BP:regulation of transcription, DNA-templated;BP:response to wounding;BP:transcription, DNA-templated;CC:nucleus;MF:transcription corepressor activity;	K13464	JAZ	map04075	Plant hormone signal transduction	------	------	gi|961512688|sp|A2YNP2.1|TI10B_ORYSI;	RecName: Full=Protein TIFY 10b;	PF06200.11;PF09425.7	tify;CCT_2	tify domain;Divergent CCT motif
TRINITY_DN52414_c5_g1	904	9.615	4.615	1.815		------	------	------	------	------	------	------	------	------	------	------	------	------
TRINITY_DN52416_c1_g1	746	83.22	19.29	24.765	CBL-interacting serine/threonine-protein kinase 12 [Arachis ipaensis]	GO:0007165;GO:0007165;GO:0016021;GO:0016021;GO:0005524;GO:0004674;GO:0005524;GO:0004674	BP:signal transduction;BP:signal transduction;CC:integral component of membrane;CC:integral component of membrane;MF:ATP binding;MF:protein serine/threonine kinase activity;MF:ATP binding;MF:protein serine/threonine kinase activity;	K07198	PRKAA, AMPK	------	------	------	------	gi|75337443|sp|Q9SN43.1|CIPKC_ARATH;	RecName: Full=CBL-interacting serine/threonine-protein kinase 12; AltName: Full=SNF1-related kinase 3.9; AltName: Full=SOS2-like protein kinase PKS8;	PF00069.22;PF07714.14;PF14531.3;PF01163.19;PF06293.11	Pkinase;Pkinase_Tyr;Kinase-like;RIO1;Kdo	Protein kinase domain;Protein tyrosine kinase;Kinase-like;RIO1 family;Lipopolysaccharide kinase
TRINITY_DN52417_c2_g4	1452	0.27	10.47	8.28	Leucine-rich repeat extensin-like protein 6 [Ananas comosus]	------	------	------	------	------	------	------	------	gi|75335502|sp|Q9LUI1.1|LRX6_ARATH;	RecName: Full=Leucine-rich repeat extensin-like protein 6; Short=AtLRX6; Short=LRR/EXTENSIN6; AltName: Full=Cell wall hydroxyproline-rich glycoprotein; Flags: Precursor;	PF13855.3;PF12799.4;PF08263.9	LRR_8;LRR_4;LRRNT_2	Leucine rich repeat;Leucine Rich repeats;Leucine rich repeat N-terminal domain
TRINITY_DN52424_c6_g1	899	1.7	0	0.205	uncharacterized protein LOC109846823 [Asparagus officinalis]	------	------	------	------	------	------	------	------	------	------	------	------	------
TRINITY_DN52429_c6_g1	1315	0.145	2.145	1.59	PREDICTED: uncharacterized protein LOC109222805, partial [Nicotiana attenuata]	GO:0003676;GO:0004523	MF:nucleic acid binding;MF:RNA-DNA hybrid ribonuclease activity;	------	------	------	------	------	------	------	------	------	------	------
TRINITY_DN52433_c1_g1	1217	35.175	2.265	6.68		------	------	------	------	------	------	------	------	------	------	------	------	------
TRINITY_DN52462_c1_g2	1181	1.465	0.02	0.115		------	------	------	------	------	------	------	------	------	------	------	------	------
TRINITY_DN52462_c1_g5	2133	2.385	0.275	0.1	putative RNA-directed DNA polymerase [Rosa chinensis]	GO:0015074;GO:0003676;GO:0003676;GO:0008270;GO:0003676;GO:0008270	BP:DNA integration;MF:nucleic acid binding;MF:nucleic acid binding;MF:zinc ion binding;MF:nucleic acid binding;MF:zinc ion binding;	------	------	------	------	------	------	gi|130582|sp|P10978.1|POLX_TOBAC;	RecName: Full=Retrovirus-related Pol polyprotein from transposon TNT 1-94; Includes: RecName: Full=Protease; Includes: RecName: Full=Reverse transcriptase; Includes: RecName: Full=Endonuclease;	PF14111.3	DUF4283	Domain of unknown function
TRINITY_DN52504_c5_g2	722	4.54	38.305	8.335		------	------	------	------	------	------	------	------	------	------	PF00257.16	Dehydrin	Dehydrin
TRINITY_DN52504_c5_g3	748	3.515	193.695	5.545		------	------	------	------	------	------	------	------	------	------	PF00257.16	Dehydrin	Dehydrin
TRINITY_DN52521_c2_g1	1228	8.995	0	1.925		------	------	------	------	------	------	------	------	------	------	------	------	------
TRINITY_DN52564_c1_g1	1086	11.69	1.36	3	mitochondrial alternative oxidase 1 [Litchi chinensis]	GO:0016021;GO:0070469;GO:0016021;GO:0070469;GO:0016021;GO:0070469;GO:0016021;GO:0070469;GO:0009916;GO:0046872;GO:0009916;GO:0046872;GO:0009916;GO:0046872;GO:0009916;GO:0046872	CC:integral component of membrane;CC:respiratory chain;CC:integral component of membrane;CC:respiratory chain;CC:integral component of membrane;CC:respiratory chain;CC:integral component of membrane;CC:respiratory chain;MF:alternative oxidase activity;MF:metal ion binding;MF:alternative oxidase activity;MF:metal ion binding;MF:alternative oxidase activity;MF:metal ion binding;MF:alternative oxida…	K17893	AOX1, AOX2	------	------	------	------	gi|3913143|sp|O23913.1|AOX1B_ARATH;	RecName: Full=Ubiquinol oxidase 1b, mitochondrial; AltName: Full=Alternative oxidase 1b; Flags: Precursor;	PF01786.14	AOX	Alternative oxidase
TRINITY_DN52580_c0_g2	1054	0	7.875	0.465		------	------	------	------	------	------	------	------	------	------	------	------	------
TRINITY_DN52608_c4_g1	925	26.36	135.805	32.04	PREDICTED: uncharacterized protein LOC105050969 [Elaeis guineensis]	GO:0016021;GO:0016021;GO:0016021;GO:0016021	CC:integral component of membrane;CC:integral component of membrane;CC:integral component of membrane;CC:integral component of membrane;	------	------	------	------	------	------	------	------	------	------	------
TRINITY_DN52626_c2_g1	444	68.675	752.56	310.505	pectinesterase-like [Ananas comosus]	GO:0042545;GO:0045490;GO:0042545;GO:0045490;GO:0005618;GO:0005576;GO:0005618;GO:0005576;GO:0016021;GO:0045330;GO:0004857;GO:0030599;GO:0045330;GO:0004857;GO:0030599	BP:cell wall modification;BP:pectin catabolic process;BP:cell wall modification;BP:pectin catabolic process;CC:cell wall;CC:extracellular region;CC:cell wall;CC:extracellular region;CC:integral component of membrane;MF:aspartyl esterase activity;MF:enzyme inhibitor activity;MF:pectinesterase activity;MF:aspartyl esterase activity;MF:enzyme inhibitor activity;MF:pectinesterase activity;	K01051	E3.1.1.11	map00040	Pentose and glucuronate interconversions	------	------	gi|6093738|sp|Q96576.1|PME3_SOLLC;	RecName: Full=Pectinesterase 3; Short=PE 3; AltName: Full=Pectin methylesterase 3; Flags: Precursor;	PF01095.16	Pectinesterase	Pectinesterase
TRINITY_DN52636_c1_g1	1709	0.245	6.275	1.175	PREDICTED: cytochrome P450 78A5-like [Phoenix dactylifera]	GO:0016021;GO:0016021;GO:0016021;GO:0020037;GO:0005506;GO:0004497;GO:0016705;GO:0020037;GO:0005506;GO:0004497;GO:0016705;GO:0020037;GO:0005506;GO:0004497;GO:0016705	CC:integral component of membrane;CC:integral component of membrane;CC:integral component of membrane;MF:heme binding;MF:iron ion binding;MF:monooxygenase activity;MF:oxidoreductase activity, acting on paired donors, with incorporation or reduction of molecular oxygen;MF:heme binding;MF:iron ion binding;MF:monooxygenase activity;MF:oxidoreductase activity, acting on paired donors, with incorporat…	K20619	CYP78A	------	------	COG2124	Q:Secondary metabolites biosynthesis, transport and catabolism	gi|75311380|sp|Q9LMX7.1|C78A5_ARATH;	RecName: Full=Cytochrome P450 78A5; AltName: Full=Protein KLUH;	PF00067.19	p450	Cytochrome P450
TRINITY_DN52673_c7_g1	1090	36.33	2.375	1.935	uncharacterized protein A4U43_C07F11860 [Asparagus officinalis]	GO:0016021;GO:0005524;GO:0042626	CC:integral component of membrane;MF:ATP binding;MF:ATPase activity, coupled to transmembrane movement of substances;	K05658	ABCB1, CD243	map02010	ABC transporters	------	------	gi|75318687|sp|O80725.1|AB4B_ARATH;	RecName: Full=ABC transporter B family member 4; Short=ABC transporter ABCB.4; Short=AtABCB4; AltName: Full=Multidrug resistance protein 4; AltName: Full=P-glycoprotein 4;	PF00664.20	ABC_membrane	ABC transporter transmembrane region
TRINITY_DN52682_c0_g1	1412	25.795	34.535	41.875		------	------	------	------	------	------	------	------	------	------	------	------	------
TRINITY_DN52687_c8_g1	921	68.26	15.83	15.635	annexin D5 [Asparagus officinalis]	GO:0009555;GO:0009846;GO:0009860;GO:0009409;GO:0009408;GO:0009639;GO:0009651;GO:0009414;GO:0009555;GO:0009846;GO:0009860;GO:0009409;GO:0009408;GO:0009639;GO:0009651;GO:0009414;GO:0005509;GO:0005544;GO:0051015;GO:0005509;GO:0005544;GO:0051015;GO:0005509;GO:0005544	BP:pollen development;BP:pollen germination;BP:pollen tube growth;BP:response to cold;BP:response to heat;BP:response to red or far red light;BP:response to salt stress;BP:response to water deprivation;BP:pollen development;BP:pollen germination;BP:pollen tube growth;BP:response to cold;BP:response to heat;BP:response to red or far red light;BP:response to salt stress;BP:response to water depriva…	K17095	ANXA7_11	------	------	------	------	gi|134035062|sp|Q9C9X3.2|ANXD5_ARATH;	RecName: Full=Annexin D5; AltName: Full=AnnAt5;	PF00191.17	Annexin	Annexin
TRINITY_DN52696_c7_g1	1459	1.285	0	0	Retrovirus-related Pol polyprotein from transposon TNT 1-94 [Cajanus cajan]	GO:0015074;GO:0003676;GO:0008270;GO:0016787;GO:0003676;GO:0008270;GO:0003676;GO:0008270	BP:DNA integration;MF:nucleic acid binding;MF:zinc ion binding;MF:hydrolase activity;MF:nucleic acid binding;MF:zinc ion binding;MF:nucleic acid binding;MF:zinc ion binding;	------	------	------	------	------	------	gi|130582|sp|P10978.1|POLX_TOBAC;	RecName: Full=Retrovirus-related Pol polyprotein from transposon TNT 1-94; Includes: RecName: Full=Protease; Includes: RecName: Full=Reverse transcriptase; Includes: RecName: Full=Endonuclease;	------	------	------
TRINITY_DN52698_c4_g7	1985	0.125	1.555	0.15		------	------	------	------	------	------	------	------	------	------	------	------	------
TRINITY_DN52717_c1_g1	480	64.285	1.96	46.23		------	------	------	------	------	------	------	------	------	------	------	------	------
TRINITY_DN52812_c0_g3	1175	10.89	2.2	4.56	PREDICTED: AAA-ATPase At4g25835-like [Elaeis guineensis]	GO:0005524;GO:0008233;GO:0005524	MF:ATP binding;MF:peptidase activity;MF:ATP binding;	------	------	------	------	------	------	gi|75333995|sp|Q9FKM3.1|AATPK_ARATH;	RecName: Full=AAA-ATPase At5g57480; Flags: Precursor;	PF00004.26;PF05496.9;PF07728.11;PF05673.10;PF13191.3	AAA;RuvB_N;AAA_5;DUF815;AAA_16	ATPase family associated with various cellular activities;Holliday junction DNA helicase ruvB N-terminus;AAA domain;Protein of unknown function;AAA ATPase domain
TRINITY_DN52814_c3_g1	1444	34.535	0	1.78		------	------	------	------	------	------	------	------	------	------	------	------	------
TRINITY_DN52830_c3_g6	903	69.265	10.78	7.755	PREDICTED: putative serine/threonine-protein kinase isoform X1 [Phoenix dactylifera]	GO:0005524;GO:0004674;GO:0005524;GO:0004674;GO:0005524;GO:0004674	MF:ATP binding;MF:protein serine/threonine kinase activity;MF:ATP binding;MF:protein serine/threonine kinase activity;MF:ATP binding;MF:protein serine/threonine kinase activity;	K04733	IRAK4	------	------	COG0515	T:Signal transduction mechanisms	gi|263711285|sp|C0LGH2.2|Y1561_ARATH;	RecName: Full=Probable LRR receptor-like serine/threonine-protein kinase At1g56130; Flags: Precursor;	PF07714.14;PF00069.22	Pkinase_Tyr;Pkinase	Protein tyrosine kinase;Protein kinase domain
TRINITY_DN52911_c1_g3	2806	0.035	0.65	1.625	uncharacterized protein LOC111381341 isoform X1 [Olea europaea var. sylvestris]	------	------	------	------	------	------	------	------	------	------	------	------	------
TRINITY_DN52980_c7_g7	2104	9.115	0.82	0.395	zinc finger MYM-type protein 1-like [Prunus persica]	------	------	------	------	------	------	------	------	------	------	------	------	------
TRINITY_DN52985_c7_g3	901	1.875	11.245	5.185		------	------	------	------	------	------	------	------	------	------	------	------	------
TRINITY_DN52988_c5_g4	899	8.64	1.085	2.14		------	------	------	------	------	------	------	------	------	------	------	------	------
TRINITY_DN52992_c0_g1	672	1786.32	7933.45	5721.32	non-specific lipid-transfer protein 1-like [Phalaenopsis equestris]	GO:0006869;GO:0006869;GO:0006869;GO:0008289;GO:0008289;GO:0008289	BP:lipid transport;BP:lipid transport;BP:lipid transport;MF:lipid binding;MF:lipid binding;MF:lipid binding;	------	------	------	------	------	------	gi|3914136|sp|O23758.1|NLTP_CICAR;	RecName: Full=Non-specific lipid-transfer protein; Short=LTP; Flags: Precursor;	PF00234.19;PF14368.3	Tryp_alpha_amyl;LTP_2	Protease inhibitor/seed storage/LTP family;Probable lipid transfer
TRINITY_DN53018_c1_g1	815	32.45	173.32	203.535	vacuolar-processing enzyme [Brachypodium distachyon]	GO:0051603;GO:0006624;GO:0005773;GO:0004197;GO:0008233	BP:proteolysis involved in cellular protein catabolic process;BP:vacuolar protein processing;CC:vacuole;MF:cysteine-type endopeptidase activity;MF:peptidase activity;	K01369	LGMN	------	------	------	------	gi|48429177|sp|O24325.1|VPE1_PHAVU;	RecName: Full=Vacuolar-processing enzyme; Short=VPE; AltName: Full=Legumain-like proteinase; Short=LLP; Flags: Precursor;	PF01650.15	Peptidase_C13	Peptidase C13 family
TRINITY_DN53020_c3_g2	1123	9.01	1.71	0.76		------	------	------	------	------	------	------	------	------	------	------	------	------
TRINITY_DN53035_c6_g1	404	38.425	481.21	477.025	ribulose bisphosphate carboxylase small chain, chloroplastic-like [Asparagus officinalis]	------	------	K01602	rbcS	map00630;map00710	Glyoxylate and dicarboxylate metabolism;Carbon fixation in photosynthetic organisms	COG4451	C:Energy production and conversion	gi|3914574|sp|O22572.1|RBS2_FRIAG;	RecName: Full=Ribulose bisphosphate carboxylase small chain 2, chloroplastic; Short=RuBisCO small subunit 2; Flags: Precursor;	PF00101.17	RuBisCO_small	Ribulose bisphosphate carboxylase, small chain
TRINITY_DN53064_c0_g3	2226	3.955	0.17	0.105		------	------	------	------	------	------	------	------	------	------	------	------	------
TRINITY_DN53069_c2_g3	1829	26.165	4.395	4.345	transmembrane protein 45A [Asparagus officinalis]	GO:0016021;GO:0016021	CC:integral component of membrane;CC:integral component of membrane;	------	------	------	------	------	------	------	------	PF04819.9	DUF716	Family of unknown function
TRINITY_DN53130_c6_g1	3354	11.47	0.73	1.73	LOW QUALITY PROTEIN: receptor-like protein kinase 5 [Asparagus officinalis]	GO:0016021;GO:0005524;GO:0004674	CC:integral component of membrane;MF:ATP binding;MF:protein serine/threonine kinase activity;	------	------	------	------	------	------	gi|75337207|sp|Q9SGP2.1|HSL1_ARATH;	RecName: Full=Receptor-like protein kinase HSL1; AltName: Full=Protein HAESA-LIKE1; Flags: Precursor;	PF07714.14;PF00069.22;PF13855.3;PF12799.4;PF08263.9	Pkinase_Tyr;Pkinase;LRR_8;LRR_4;LRRNT_2	Protein tyrosine kinase;Protein kinase domain;Leucine rich repeat;Leucine Rich repeats;Leucine rich repeat N-terminal domain
TRINITY_DN53151_c10_g1	1055	4.285	0.465	1.18		------	------	------	------	------	------	------	------	------	------	------	------	------
TRINITY_DN53176_c0_g1	3103	85.225	25.71	37.62	spermidine synthase 1-like isoform X2 [Dendrobium catenatum]	------	------	K00797	speE, SRM	map00270;map00480;map00330;map00410	Cysteine and methionine metabolism;Glutathione metabolism;Arginine and proline metabolism;beta-Alanine metabolism	------	------	gi|12229998|sp|Q9SMB1.1|SPD1_ORYSJ;	RecName: Full=Spermidine synthase 1; Short=SPDSY 1; AltName: Full=Putrescine aminopropyltransferase 1;	PF01564.14	Spermine_synth	Spermine/spermidine synthase
TRINITY_DN53211_c4_g2	760	38.84	6.035	9.935	Phloem protein 2-A13 [Theobroma cacao]	------	------	------	------	------	------	------	------	gi|75262542|sp|Q9FJ80.1|P2A14_ARATH;	RecName: Full=F-box protein PP2-A14; AltName: Full=Protein PHLOEM PROTEIN 2-LIKE A14; Short=AtPP2-A14; AltName: Full=SKP1-interacting partner 13;	PF00646.30	F-box	F-box domain
TRINITY_DN53232_c2_g1	1543	1.53	0.045	0.03		------	------	------	------	------	------	------	------	------	------	------	------	------
TRINITY_DN53280_c0_g1	764	10.465	0.28	17.655	PREDICTED: 7-deoxyloganetin glucosyltransferase-like [Phoenix dactylifera]	GO:0008152;GO:0008152;GO:0008152;GO:0008152;GO:0016758;GO:0016758;GO:0016758;GO:0016758	BP:metabolic process;BP:metabolic process;BP:metabolic process;BP:metabolic process;MF:transferase activity, transferring hexosyl groups;MF:transferase activity, transferring hexosyl groups;MF:transferase activity, transferring hexosyl groups;MF:transferase activity, transferring hexosyl groups;	K21374	UGT85A	------	------	------	------	gi|334351205|sp|Q9LMF1.2|U85A3_ARATH;	RecName: Full=UDP-glycosyltransferase 85A3;	PF00201.15	UDPGT	UDP-glucoronosyl and UDP-glucosyl transferase
TRINITY_DN53305_c7_g3	2087	10.58	1.445	2.04	PREDICTED: probable protein phosphatase 2C 40 isoform X1 [Elaeis guineensis]	GO:0004722	MF:protein serine/threonine phosphatase activity;	------	------	------	------	------	------	gi|75274292|sp|Q9LUS8.1|P2C40_ARATH;	RecName: Full=Probable protein phosphatase 2C 40; Short=AtPP2C40; AltName: Full=Protein phosphatase 2C homolog 1;	PF00481.18	PP2C	Protein phosphatase 2C
TRINITY_DN53331_c5_g2	4200	6.34	0.025	0.42	uncharacterized protein A4U43_C05F32190 [Asparagus officinalis]	GO:0005509;GO:0005525;GO:0005509;GO:0005525;GO:0005509;GO:0005525	MF:calcium ion binding;MF:GTP binding;MF:calcium ion binding;MF:GTP binding;MF:calcium ion binding;MF:GTP binding;	K12483	EHD1	map04144	Endocytosis	------	------	gi|75165238|sp|Q94CF0.1|EHD1_ARATH;	RecName: Full=EH domain-containing protein 1; Short=AtEHD1;	------	------	------
TRINITY_DN53334_c8_g2	1457	41.79	2.59	3.585	uncharacterized protein At1g01500 [Asparagus officinalis]	------	------	------	------	------	------	------	------	gi|75150621|sp|Q8GUH2.1|Y1015_ARATH;	RecName: Full=Uncharacterized protein At1g01500;	------	------	------
TRINITY_DN53345_c2_g2	488	0.47	33.245	20.725	metallothionein type 2, partial [Typha angustifolia]	GO:0046872;GO:0046872;GO:0046872;GO:0046872	MF:metal ion binding;MF:metal ion binding;MF:metal ion binding;MF:metal ion binding;	------	------	------	------	------	------	gi|3334260|sp|O22319.2|MT2_MUSAC;	RecName: Full=Metallothionein-like protein type 2;	PF01439.15	Metallothio_2	Metallothionein
TRINITY_DN53345_c2_g7	455	0.265	37.205	65.965	PREDICTED: metallothionein-like protein type 2 isoform X2 [Phoenix dactylifera]	GO:0046872;GO:0046872	MF:metal ion binding;MF:metal ion binding;	------	------	------	------	------	------	gi|122177568|sp|Q19LA2.1|MT2B_COLES;	RecName: Full=Metallothionein type 2b; Short=CeMT2b [Colocasia esculenta];	PF01439.15	Metallothio_2	Metallothionein
TRINITY_DN53362_c10_g1	793	84.715	8.8	68.95	ferric reduction oxidase 7, chloroplastic-like isoform X1 [Asparagus officinalis]	GO:0016021;GO:0016491	CC:integral component of membrane;MF:oxidoreductase activity;	------	------	------	------	------	------	gi|122216266|sp|Q3KTM0.1|FRO7_ARATH;	RecName: Full=Ferric reduction oxidase 7, chloroplastic; Short=AtFRO7; AltName: Full=Ferric-chelate reductase 7; Flags: Precursor;	PF01794.16	Ferric_reduct	Ferric reductase like transmembrane component
TRINITY_DN53362_c10_g2	1732	77.82	10.2	64.84	ferric reduction oxidase 7, chloroplastic-like isoform X1 [Asparagus officinalis]	GO:0016021;GO:0016491	CC:integral component of membrane;MF:oxidoreductase activity;	------	------	------	------	------	------	gi|75158747|sp|Q8RWS6.1|FRO6_ARATH;	RecName: Full=Ferric reduction oxidase 6; Short=AtFRO6; AltName: Full=Ferric-chelate reductase 6;	PF08030.9;PF08022.9;PF01794.16;PF00175.18	NAD_binding_6;FAD_binding_8;Ferric_reduct;NAD_binding_1	Ferric reductase NAD binding domain;FAD-binding domain;Ferric reductase like transmembrane component;Oxidoreductase NAD-binding domain
TRINITY_DN53367_c2_g1	802	4.035	0.115	0.835		------	------	------	------	------	------	------	------	------	------	------	------	------
TRINITY_DN53391_c9_g1	832	0.19	12.035	3.235	uncharacterized protein LOC110740136 [Chenopodium quinoa]	------	------	------	------	------	------	------	------	------	------	PF03760.12	LEA_1	Late embryogenesis abundant
TRINITY_DN53415_c3_g10	772	40.885	5.265	2.93	Zinc finger, LSD1-type domain containing protein [Parasponia andersonii]	GO:0016021	CC:integral component of membrane;	------	------	------	------	------	------	gi|75232683|sp|Q7XJE6.1|MCA1_ARATH;	RecName: Full=Metacaspase-1; Short=AtMC1; AltName: Full=Metacaspase 1b; Short=AtMCP1b; AltName: Full=Protein LSD ONE LIKE 3;	------	------	------
TRINITY_DN53432_c0_g2	2502	8.53	2.11	4.78	PREDICTED: uncharacterized protein LOC103710807 [Phoenix dactylifera]	GO:0016021;GO:0016021	CC:integral component of membrane;CC:integral component of membrane;	------	------	------	------	------	------	gi|122213725|sp|Q3E6Y3.1|Y1869_ARATH;	RecName: Full=Uncharacterized protein At1g28695; Flags: Precursor;	PF03407.13	Nucleotid_trans	Nucleotide-diphospho-sugar transferase
TRINITY_DN53437_c4_g4	1909	0.025	1.85	1.38	hypothetical protein VITISV_020318 [Vitis vinifera]	GO:0015074;GO:0015074;GO:0015074;GO:0015074;GO:0005634;GO:0005634;GO:0005634;GO:0005634;GO:0005634;GO:0004190;GO:0003676;GO:0004190;GO:0004190;GO:0003676;GO:0004190;GO:0003676;GO:0003676	BP:DNA integration;BP:DNA integration;BP:DNA integration;BP:DNA integration;CC:nucleus;CC:nucleus;CC:nucleus;CC:nucleus;CC:nucleus;MF:aspartic-type endopeptidase activity;MF:nucleic acid binding;MF:aspartic-type endopeptidase activity;MF:aspartic-type endopeptidase activity;MF:nucleic acid binding;MF:aspartic-type endopeptidase activity;MF:nucleic acid binding;MF:nucleic acid binding;	------	------	------	------	------	------	------	------	------	------	------
TRINITY_DN53451_c3_g1	1287	162.85	30.73	35.74	PREDICTED: multiprotein-bridging factor 1c [Elaeis guineensis]	GO:0043565;GO:0043565	MF:sequence-specific DNA binding;MF:sequence-specific DNA binding;	K03627	MBF1	------	------	COG1813	K:Transcription	gi|75274343|sp|Q9LV58.1|MBF1C_ARATH;	RecName: Full=Multiprotein-bridging factor 1c;	PF08523.7;PF01381.19	MBF1;HTH_3	Multiprotein bridging factor 1;Helix-turn-helix
TRINITY_DN53467_c6_g1	2129	1.6	0.185	0.345		------	------	------	------	------	------	------	------	------	------	------	------	------
TRINITY_DN53475_c0_g2	453	28.105	2.66	1.705	PREDICTED: glutathione S-transferase U17-like [Elaeis guineensis]	GO:0016740;GO:0016740;GO:0016740	MF:transferase activity;MF:transferase activity;MF:transferase activity;	K00799	GST, gst	map00480	Glutathione metabolism	------	------	gi|75334347|sp|Q9FUS9.1|GSTUI_ARATH;	RecName: Full=Glutathione S-transferase U18; Short=AtGSTU18; AltName: Full=GST class-tau member 18; AltName: Full=Glutathione S-transferase 29;	PF02798.17;PF13417.3;PF13409.3;PF17172.1	GST_N;GST_N_3;GST_N_2;GST_N_4	Glutathione S-transferase, N-terminal domain;Glutathione S-transferase, N-terminal domain;Glutathione S-transferase, N-terminal domain;Glutathione S-transferase N-terminal domain
TRINITY_DN53475_c0_g3	731	64.43	14.055	16.94	PREDICTED: glutathione S-transferase U17-like [Elaeis guineensis]	GO:0016740;GO:0016740;GO:0016740;GO:0016740	MF:transferase activity;MF:transferase activity;MF:transferase activity;MF:transferase activity;	K00799	GST, gst	map00480	Glutathione metabolism	------	------	gi|75334347|sp|Q9FUS9.1|GSTUI_ARATH;	RecName: Full=Glutathione S-transferase U18; Short=AtGSTU18; AltName: Full=GST class-tau member 18; AltName: Full=Glutathione S-transferase 29;	PF02798.17;PF13417.3;PF13409.3	GST_N;GST_N_3;GST_N_2	Glutathione S-transferase, N-terminal domain;Glutathione S-transferase, N-terminal domain;Glutathione S-transferase, N-terminal domain
TRINITY_DN53499_c3_g1	971	7.335	0.805	3.615		------	------	------	------	------	------	------	------	------	------	------	------	------
TRINITY_DN53525_c4_g1	710	552.87	24.985	62.24	Fatty acid desaturase, type 1, core [Cynara cardunculus var. scolymus]	GO:0006633;GO:0006633;GO:0016021;GO:0016021;GO:0016717;GO:0016717	BP:fatty acid biosynthetic process;BP:fatty acid biosynthetic process;CC:integral component of membrane;CC:integral component of membrane;MF:oxidoreductase activity, acting on paired donors, with oxidation of a pair of donors resulting in the reduction of molecular oxygen to two molecules of water;MF:oxidoreductase activity, acting on paired donors, with oxidation of a pair of donors resulting in…	K20416	FAD5	------	------	------	------	gi|62510457|sp|Q949X0.2|ADS3_ARATH;	RecName: Full=Palmitoyl-monogalactosyldiacylglycerol delta-7 desaturase, chloroplastic; AltName: Full=Acyl-lipid desaturase 3; AltName: Full=Fatty acid desaturase 5; Short=FAD5; AltName: Full=Fatty acid desaturase B; Short=FADB; AltName: Full=Monogalactosyldiacylglycerol-specific palmitic acid desaturase; Flags: Precursor;	------	------	------
TRINITY_DN53544_c4_g2	816	4.96	0	4.11	PREDICTED: cation/calcium exchanger 1-like [Musa acuminata subsp. malaccensis]	GO:0055085;GO:0055085;GO:0055085;GO:0016021;GO:0016021;GO:0016021	BP:transmembrane transport;BP:transmembrane transport;BP:transmembrane transport;CC:integral component of membrane;CC:integral component of membrane;CC:integral component of membrane;	K13754	SLC24A6, NCKX6	------	------	------	------	gi|75273570|sp|Q9LJI2.1|CCX3_ARATH;	RecName: Full=Cation/calcium exchanger 3; Short=AtCCX3; AltName: Full=Protein CATION CALCIUM EXCHANGER 3; AltName: Full=Protein CATION EXCHANGER 9;	------	------	------
TRINITY_DN53572_c4_g1	967	0	1.485	0.765		------	------	------	------	------	------	------	------	------	------	------	------	------
TRINITY_DN53583_c1_g3	2330	0.235	2.01	0.665	ABC transporter G family member 6-like [Dendrobium catenatum]	GO:0016021;GO:0016021;GO:0005524;GO:0016887;GO:0005524;GO:0016887	CC:integral component of membrane;CC:integral component of membrane;MF:ATP binding;MF:ATPase activity;MF:ATP binding;MF:ATPase activity;	------	------	------	------	COG1131	V:Defense mechanisms	gi|75318720|sp|O80946.1|AB1G_ARATH;	RecName: Full=ABC transporter G family member 1; Short=ABC transporter ABCG.1; Short=AtABCG1; AltName: Full=White-brown complex homolog protein 1; Short=AtWBC1;	PF01061.21;PF00005.24;PF13191.3;PF13555.3	ABC2_membrane;ABC_tran;AAA_16;AAA_29	ABC-2 type transporter;ABC transporter;AAA ATPase domain;P-loop containing region of AAA domain
TRINITY_DN53586_c5_g1	932	40.185	1.44	9.93		------	------	------	------	------	------	------	------	------	------	------	------	------
TRINITY_DN53637_c2_g3	1214	0.05	1.585	1.175		------	------	------	------	------	------	------	------	------	------	------	------	------
TRINITY_DN53676_c0_g1	1326	0	1.755	1.54	proline-rich receptor-like protein kinase PERK15 [Asparagus officinalis]	GO:0016021;GO:0005524;GO:0004672	CC:integral component of membrane;MF:ATP binding;MF:protein kinase activity;	------	------	------	------	------	------	gi|75330719|sp|Q8RWW0.1|ALE2_ARATH;	RecName: Full=Receptor-like serine/threonine-protein kinase ALE2; AltName: Full=Protein ABNORMAL LEAF SHAPE 2; Flags: Precursor;	PF14392.3	zf-CCHC_4	Zinc knuckle
TRINITY_DN53686_c3_g2	1496	2.085	10.425	3.07	PREDICTED: L-type lectin-domain containing receptor kinase IV.1-like [Elaeis guineensis]	------	------	------	------	------	------	------	------	gi|75337901|sp|Q9SZD5.1|LRK59_ARATH;	RecName: Full=L-type lectin-domain containing receptor kinase V.9; Short=LecRK-V.9; Flags: Precursor;	PF00139.16	Lectin_legB	Legume lectin domain
TRINITY_DN53699_c6_g1	1867	3.325	0.315	0.435	hypothetical protein GOBAR_DD06575 [Gossypium barbadense]	GO:0015074;GO:0015074;GO:0015074;GO:0003676;GO:0008270;GO:0003676;GO:0008270;GO:0003676;GO:0008270	BP:DNA integration;BP:DNA integration;BP:DNA integration;MF:nucleic acid binding;MF:zinc ion binding;MF:nucleic acid binding;MF:zinc ion binding;MF:nucleic acid binding;MF:zinc ion binding;	------	------	------	------	------	------	gi|130582|sp|P10978.1|POLX_TOBAC;	RecName: Full=Retrovirus-related Pol polyprotein from transposon TNT 1-94; Includes: RecName: Full=Protease; Includes: RecName: Full=Reverse transcriptase; Includes: RecName: Full=Endonuclease;	------	------	------
TRINITY_DN53725_c1_g1	281	21.02	374.655	85.61	hypothetical protein EUGRSUZ_J02069 [Eucalyptus grandis]	------	------	------	------	------	------	------	------	------	------	------	------	------
TRINITY_DN53744_c4_g3	683	5.63	0	5.8	PREDICTED: uncharacterized protein LOC105043846 isoform X1 [Elaeis guineensis]	------	------	------	------	------	------	------	------	------	------	------	------	------
TRINITY_DN53785_c4_g1	982	16.805	3.065	3.845		------	------	------	------	------	------	------	------	------	------	PF12796.4;PF13637.3;PF13857.3	Ank_2;Ank_4;Ank_5	Ankyrin repeats;Ankyrin repeats;Ankyrin repeats
TRINITY_DN53824_c1_g1	2640	44.67	8.09	10.375	aspartic proteinase-like protein 2 [Asparagus officinalis]	GO:0016021;GO:0004190	CC:integral component of membrane;MF:aspartic-type endopeptidase activity;	K00924	E2.7.1.-	------	------	------	------	------	------	------	------	------
TRINITY_DN53825_c3_g2	793	100.865	9.37	22.085	PREDICTED: ABC transporter B family member 21-like [Elaeis guineensis]	GO:0016021;GO:0005524;GO:0042626	CC:integral component of membrane;MF:ATP binding;MF:ATPase activity, coupled to transmembrane movement of substances;	K05658	ABCB1, CD243	map02010	ABC transporters	------	------	gi|75334433|sp|Q9FWX7.1|AB11B_ARATH;	RecName: Full=ABC transporter B family member 11; Short=ABC transporter ABCB.11; Short=AtABCB11; AltName: Full=Multidrug resistance protein 8; AltName: Full=P-glycoprotein 11;	PF00664.20;PF00005.24;PF13555.3;PF13191.3	ABC_membrane;ABC_tran;AAA_29;AAA_16	ABC transporter transmembrane region;ABC transporter;P-loop containing region of AAA domain;AAA ATPase domain
TRINITY_DN53855_c0_g2	526	40.405	1.195	33.17	receptor kinase-like protein Xa21 [Asparagus officinalis]	------	------	------	------	------	------	------	------	gi|263419078|sp|C0LGT6.1|EFR_ARATH;	RecName: Full=LRR receptor-like serine/threonine-protein kinase EFR; AltName: Full=Elongation factor Tu receptor; Short=EF-Tu receptor; Flags: Precursor;	PF13855.3;PF12799.4	LRR_8;LRR_4	Leucine rich repeat;Leucine Rich repeats
TRINITY_DN53855_c0_g4	644	48.82	2.9	0	LOW QUALITY PROTEIN: receptor kinase-like protein Xa21 [Asparagus officinalis]	GO:0016021;GO:0016021;GO:0005524;GO:0004674;GO:0005524;GO:0004674	CC:integral component of membrane;CC:integral component of membrane;MF:ATP binding;MF:protein serine/threonine kinase activity;MF:ATP binding;MF:protein serine/threonine kinase activity;	------	------	------	------	------	------	gi|263419078|sp|C0LGT6.1|EFR_ARATH;	RecName: Full=LRR receptor-like serine/threonine-protein kinase EFR; AltName: Full=Elongation factor Tu receptor; Short=EF-Tu receptor; Flags: Precursor;	PF13855.3	LRR_8	Leucine rich repeat
TRINITY_DN53858_c3_g1	830	5.565	59.6	78.235	hypothetical protein GQ55_8G167900 [Panicum hallii var. hallii]	------	------	------	------	------	------	------	------	------	------	------	------	------
TRINITY_DN53870_c5_g9	742	5.08	39.235	82.65	hypothetical protein AQUCO_00300109v1 [Aquilegia coerulea]	------	------	------	------	------	------	------	------	------	------	PF08137.9	DVL	DVL family
TRINITY_DN53889_c1_g4	1359	1.39	0.095	0.08		------	------	------	------	------	------	------	------	------	------	------	------	------
TRINITY_DN53889_c1_g6	2312	38.77	2.485	1.895	PREDICTED: probable protein phosphatase 2C 78 [Musa acuminata subsp. malaccensis]	GO:0046872;GO:0004722;GO:0046872;GO:0004722;GO:0046872;GO:0004722	MF:metal ion binding;MF:protein serine/threonine phosphatase activity;MF:metal ion binding;MF:protein serine/threonine phosphatase activity;MF:metal ion binding;MF:protein serine/threonine phosphatase activity;	K01102	PDP	------	------	------	------	gi|75279001|sp|O81760.1|P2C63_ARATH;	RecName: Full=Probable protein phosphatase 2C 63; Short=AtPP2C63;	PF00481.18	PP2C	Protein phosphatase 2C
TRINITY_DN53898_c0_g1	869	8.78	0.615	5.45	polygalacturonase inhibitor-like [Asparagus officinalis]	------	------	------	------	------	------	------	------	gi|464367|sp|Q05091.1|PGIP_PYRCO;	RecName: Full=Polygalacturonase inhibitor; AltName: Full=Polygalacturonase-inhibiting protein; Short=PGIG; Flags: Precursor;	PF13855.3;PF12799.4	LRR_8;LRR_4	Leucine rich repeat;Leucine Rich repeats
TRINITY_DN53904_c7_g2	401	8.315	104.53	156.87		------	------	------	------	------	------	------	------	------	------	------	------	------
TRINITY_DN53906_c2_g2	851	0.985	18.05	0.69	fasciclin-like arabinogalactan protein 7 [Asparagus officinalis]	------	------	------	------	------	------	------	------	gi|38257788|sp|Q9SJ81.1|FLA7_ARATH;	RecName: Full=Fasciclin-like arabinogalactan protein 7; Flags: Precursor;	PF02469.19	Fasciclin	Fasciclin domain
TRINITY_DN53966_c2_g1	1282	62.435	8.74	17.32	root phototropism protein 2 [Asparagus officinalis]	GO:0009638;GO:0004871	BP:phototropism;MF:signal transducer activity;	------	------	------	------	------	------	gi|82581610|sp|Q682S0.2|RPT2_ARATH;	RecName: Full=Root phototropism protein 2; AltName: Full=BTB/POZ domain-containing protein RPT2;	PF03000.11;PF00651.28	NPH3;BTB	NPH3 family;BTB/POZ domain
TRINITY_DN54029_c2_g5	418	441.54	37.685	86		------	------	------	------	------	------	------	------	------	------	------	------	------
TRINITY_DN54137_c1_g1	2070	0.86	5.775	2.76		------	------	------	------	------	------	------	------	------	------	PF00131.17;PF00582.23	Metallothio;Usp	Metallothionein;Universal stress protein family
TRINITY_DN54170_c2_g5	498	12.38	133.5	167.165	auxin-responsive protein IAA27 [Morus notabilis]	GO:0009734;GO:0006355;GO:0006351;GO:0009734;GO:0006355;GO:0006351;GO:0005634;GO:0005634	BP:auxin-activated signaling pathway;BP:regulation of transcription, DNA-templated;BP:transcription, DNA-templated;BP:auxin-activated signaling pathway;BP:regulation of transcription, DNA-templated;BP:transcription, DNA-templated;CC:nucleus;CC:nucleus;	K14484	IAA	map04075	Plant hormone signal transduction	------	------	gi|75226278|sp|Q75GB1.1|IAA17_ORYSJ;	RecName: Full=Auxin-responsive protein IAA17; AltName: Full=Indoleacetic acid-induced protein 17;	------	------	------
TRINITY_DN54198_c2_g1	899	0	2.495	0.34		------	------	------	------	------	------	------	------	------	------	------	------	------
TRINITY_DN54221_c4_g3	1450	4.285	0.095	2.375		------	------	------	------	------	------	------	------	------	------	------	------	------
TRINITY_DN54233_c0_g2	807	0.425	6.045	2.995	PREDICTED: 21 kDa protein-like [Phoenix dactylifera]	GO:0004857;GO:0004857;GO:0004857	MF:enzyme inhibitor activity;MF:enzyme inhibitor activity;MF:enzyme inhibitor activity;	------	------	------	------	------	------	gi|112717|sp|P17407.1|21KD_DAUCA;	RecName: Full=21 kDa protein; AltName: Full=1.2 protein; Flags: Precursor;	PF04043.12	PMEI	Plant invertase/pectin methylesterase inhibitor
TRINITY_DN54257_c1_g1	1276	64.255	1.515	56.575	unnamed protein product, partial [Vitis vinifera]	------	------	------	------	------	------	------	------	gi|75273319|sp|Q9LI74.1|CHUP1_ARATH;	RecName: Full=Protein CHUP1, chloroplastic; AltName: Full=Protein CHLOROPLAST UNUSUAL POSITIONING 1;	------	------	------
TRINITY_DN54287_c2_g2	692	0	2.005	3.4		------	------	------	------	------	------	------	------	------	------	------	------	------
TRINITY_DN54295_c1_g1	460	166.67	11.805	27.455	PREDICTED: uncharacterized protein LOC103722155 [Phoenix dactylifera]	GO:0016021;GO:0016021;GO:0016021;GO:0016021	CC:integral component of membrane;CC:integral component of membrane;CC:integral component of membrane;CC:integral component of membrane;	------	------	------	------	------	------	------	------	------	------	------
TRINITY_DN54306_c10_g1	1146	0	2.49	1.185	senescence-associated protein 6 [Hemerocallis hybrid cultivar]	GO:0006308;GO:0006308;GO:0004519;GO:0003676;GO:0004519;GO:0003676	BP:DNA catabolic process;BP:DNA catabolic process;MF:endonuclease activity;MF:nucleic acid binding;MF:endonuclease activity;MF:nucleic acid binding;	------	------	------	------	------	------	gi|75213205|sp|Q9SXA6.1|ENDO1_ARATH;	RecName: Full=Endonuclease 1; Short=AtENDO1; AltName: Full=Bifunctional nuclease I; Short=AtBFN1; AltName: Full=Deoxyribonuclease ENDO1; AltName: Full=Single-stranded-nucleate endonuclease ENDO1; Flags: Precursor;	PF02265.13	S1-P1_nuclease	S1/P1 Nuclease
TRINITY_DN54334_c2_g2	417	32.46	0.61	8.45		------	------	------	------	------	------	------	------	------	------	------	------	------
TRINITY_DN54334_c2_g4	401	72.995	0.685	40.35		------	------	------	------	------	------	------	------	------	------	------	------	------
TRINITY_DN54384_c4_g1	905	8.085	0.955	1.945	Ankyrin repeat-containing protein [Dendrobium catenatum]	GO:0016021	CC:integral component of membrane;	K15502	ANKRD28	------	------	------	------	gi|75246508|sp|Q8LPS2.1|ACD6_ARATH;	RecName: Full=Protein ACCELERATED CELL DEATH 6;	PF13962.3	PGG	Domain of unknown function
TRINITY_DN54406_c1_g1	443	53.065	5.76	16.015	PREDICTED: WRKY transcription factor WRKY24 [Elaeis guineensis]	GO:0006351;GO:0005634;GO:0003700;GO:0043565	BP:transcription, DNA-templated;CC:nucleus;MF:transcription factor activity, sequence-specific DNA binding;MF:sequence-specific DNA binding;	K13424	WRKY33	map04016;map04626	MAPK signaling pathway - plant;Plant-pathogen interaction	------	------	gi|148887455|sp|Q8S8P5.2|WRK33_ARATH;	RecName: Full=Probable WRKY transcription factor 33; AltName: Full=WRKY DNA-binding protein 33;	PF03106.12	WRKY	WRKY DNA -binding domain
TRINITY_DN54424_c2_g5	2051	8.595	56.135	28.74	LOW QUALITY PROTEIN: beta-glucosidase 18-like [Asparagus officinalis]	GO:0005975;GO:0005975;GO:0004553;GO:0004553	BP:carbohydrate metabolic process;BP:carbohydrate metabolic process;MF:hydrolase activity, hydrolyzing O-glycosyl compounds;MF:hydrolase activity, hydrolyzing O-glycosyl compounds;	K05350	bglB	map00460;map00940;map00500	Cyanoamino acid metabolism;Phenylpropanoid biosynthesis;Starch and sucrose metabolism	COG2723	G:Carbohydrate transport and metabolism	gi|75296458|sp|Q7XSK0.2|BGL18_ORYSJ;	RecName: Full=Beta-glucosidase 18; Short=Os4bglu18; Flags: Precursor;	PF00232.15	Glyco_hydro_1	Glycosyl hydrolase family 1
TRINITY_DN54449_c1_g2	3017	9.78	1.07	0.685	PREDICTED: glutamate receptor 2.8-like [Elaeis guineensis]	GO:0016021;GO:0004970	CC:integral component of membrane;MF:ionotropic glutamate receptor activity;	K05387	GRIP	------	------	------	------	gi|41017226|sp|Q9C5V5.2|GLR28_ARATH;	RecName: Full=Glutamate receptor 2.8; AltName: Full=Ligand-gated ion channel 2.8; Flags: Precursor;	PF01094.25;PF00060.23;PF00497.17;PF13458.3;PF10613.6	ANF_receptor;Lig_chan;SBP_bac_3;Peripla_BP_6;Lig_chan-Glu_bd	Receptor family ligand binding region;Ligand-gated ion channel;Bacterial extracellular solute-binding proteins, family 3;Periplasmic binding protein;Ligated ion channel L-glutamate- and glycine-binding site
TRINITY_DN54453_c0_g2	2365	57.225	19.8	6.955	PREDICTED: protein STRUBBELIG-RECEPTOR FAMILY 6-like [Phoenix dactylifera]	GO:0016021;GO:0016021;GO:0016021;GO:0016021;GO:0016021;GO:0005524;GO:0004672;GO:0005524;GO:0004672;GO:0005524;GO:0004672;GO:0005524;GO:0004672;GO:0005524;GO:0004672	CC:integral component of membrane;CC:integral component of membrane;CC:integral component of membrane;CC:integral component of membrane;CC:integral component of membrane;MF:ATP binding;MF:protein kinase activity;MF:ATP binding;MF:protein kinase activity;MF:ATP binding;MF:protein kinase activity;MF:ATP binding;MF:protein kinase activity;MF:ATP binding;MF:protein kinase activity;	------	------	------	------	------	------	gi|75333531|sp|Q9C8M9.1|SRF6_ARATH;	RecName: Full=Protein STRUBBELIG-RECEPTOR FAMILY 6; AltName: Full=Leucine-rich repeat receptor kinase-like protein SRF6; Flags: Precursor;	PF08263.9	LRRNT_2	Leucine rich repeat N-terminal domain
TRINITY_DN54456_c2_g7	712	17.095	1.405	1.105		------	------	------	------	------	------	------	------	------	------	------	------	------
TRINITY_DN54478_c0_g1	1054	6.655	0.57	1.265	cationic peroxidase 1-like [Asparagus officinalis]	GO:0042744;GO:0006979;GO:0042744;GO:0006979;GO:0005576;GO:0005576;GO:0020037;GO:0046872;GO:0004601;GO:0020037;GO:0046872;GO:0004601	BP:hydrogen peroxide catabolic process;BP:response to oxidative stress;BP:hydrogen peroxide catabolic process;BP:response to oxidative stress;CC:extracellular region;CC:extracellular region;MF:heme binding;MF:metal ion binding;MF:peroxidase activity;MF:heme binding;MF:metal ion binding;MF:peroxidase activity;	K00430	E1.11.1.7	map00940	Phenylpropanoid biosynthesis	------	------	gi|6093671|sp|P22195.2|PER1_ARAHY;	RecName: Full=Cationic peroxidase 1; AltName: Full=PNPC1; Flags: Precursor;	PF00141.20	peroxidase	Peroxidase
TRINITY_DN54481_c2_g2	550	0.435	12.71	8.02		------	------	------	------	------	------	------	------	------	------	------	------	------
TRINITY_DN54496_c2_g1	1198	3.315	5.7	7.995	PREDICTED: uncharacterized protein LOC103979309 isoform X3 [Musa acuminata subsp. malaccensis]	GO:0032502;GO:0006351;GO:0005634	BP:developmental process;BP:transcription, DNA-templated;CC:nucleus;	------	------	------	------	------	------	------	------	PF08879.7	WRC	WRC
TRINITY_DN54515_c5_g1	644	79.345	2.785	14.015	PREDICTED: proline dehydrogenase 1, mitochondrial-like [Phoenix dactylifera]	GO:0006562;GO:0006562;GO:0004657;GO:0004657	BP:proline catabolic process;BP:proline catabolic process;MF:proline dehydrogenase activity;MF:proline dehydrogenase activity;	K00318	PRODH	map00330	Arginine and proline metabolism	------	------	gi|6685798|sp|P92983.2|PROD1_ARATH;	RecName: Full=Proline dehydrogenase 1, mitochondrial; AltName: Full=Osmotic stress-induced proline dehydrogenase; AltName: Full=Proline oxidase; AltName: Full=Protein EARLY RESPONSIVE TO DEHYDRATION 5; Flags: Precursor;	PF01619.15	Pro_dh	Proline dehydrogenase
TRINITY_DN54527_c2_g2	1176	3.215	0.515	1.625	ethylene-responsive transcription factor ERF062-like [Asparagus officinalis]	GO:0006351;GO:0006351;GO:0006351;GO:0005634;GO:0005634;GO:0005634;GO:0003677;GO:0003700;GO:0003677;GO:0003700;GO:0003677;GO:0003700	BP:transcription, DNA-templated;BP:transcription, DNA-templated;BP:transcription, DNA-templated;CC:nucleus;CC:nucleus;CC:nucleus;MF:DNA binding;MF:transcription factor activity, sequence-specific DNA binding;MF:DNA binding;MF:transcription factor activity, sequence-specific DNA binding;MF:DNA binding;MF:transcription factor activity, sequence-specific DNA binding;	------	------	------	------	------	------	gi|75337746|sp|Q9SVQ0.1|ERF62_ARATH;	RecName: Full=Ethylene-responsive transcription factor ERF062;	PF00847.17	AP2	AP2 domain
TRINITY_DN54565_c0_g1	1894	0.79	27.7	0.885	hexokinase-4, chloroplastic [Ananas comosus]	GO:0001678;GO:0006096;GO:0005623;GO:0005524;GO:0005536;GO:0004396	BP:cellular glucose homeostasis;BP:glycolytic process;CC:cell;MF:ATP binding;MF:glucose binding;MF:hexokinase activity;	K00844	HK	map00010;map00520;map00500;map00051;map00052	Glycolysis / Gluconeogenesis;Amino sugar and nucleotide sugar metabolism;Starch and sucrose metabolism;Fructose and mannose metabolism;Galactose metabolism	COG5026	G:Carbohydrate transport and metabolism	gi|75291596|sp|Q6Q8A5.1|HXK2_TOBAC;	RecName: Full=Hexokinase-2, chloroplastic; AltName: Full=NtHxK2; Flags: Precursor;	PF03727.13;PF00349.18	Hexokinase_2;Hexokinase_1	Hexokinase;Hexokinase
TRINITY_DN54591_c2_g1	571	3.41	71.26	28.79	PREDICTED: alkane hydroxylase MAH1-like [Phoenix dactylifera]	GO:0020037;GO:0005506;GO:0004497;GO:0016705	MF:heme binding;MF:iron ion binding;MF:monooxygenase activity;MF:oxidoreductase activity, acting on paired donors, with incorporation or reduction of molecular oxygen;	------	------	------	------	------	------	gi|75309839|sp|Q9FVS9.1|C96AF_ARATH;	RecName: Full=Alkane hydroxylase MAH1; AltName: Full=Cytochrome P450 96A15; AltName: Full=Protein MID-CHAIN ALKANE HYDROXYLASE 1;	PF00067.19	p450	Cytochrome P450
TRINITY_DN54624_c1_g1	3366	274.525	52.78	221.085	PREDICTED: catalase isozyme 1 [Phoenix dactylifera]	GO:0042744;GO:0006979;GO:0004096;GO:0020037;GO:0046872	BP:hydrogen peroxide catabolic process;BP:response to oxidative stress;MF:catalase activity;MF:heme binding;MF:metal ion binding;	K03781	katE, CAT, catB, srpA	map00630;map04016;map00380;map04146	Glyoxylate and dicarboxylate metabolism;MAPK signaling pathway - plant;Tryptophan metabolism;Peroxisome	COG0753	P:Inorganic ion transport and metabolism	gi|1345674|sp|P17598.2|CATA1_GOSHI;	RecName: Full=Catalase isozyme 1 [Gossypium hirsutum];	PF00199.16	Catalase	Catalase
TRINITY_DN54638_c2_g1	1846	13.05	1.79	2.095	PREDICTED: UDP-glycosyltransferase 82A1 [Elaeis guineensis]	GO:0008152;GO:0008152;GO:0008152;GO:0043231;GO:0016758;GO:0016758;GO:0080043;GO:0080044	BP:metabolic process;BP:metabolic process;BP:metabolic process;CC:intracellular membrane-bounded organelle;MF:transferase activity, transferring hexosyl groups;MF:transferase activity, transferring hexosyl groups;MF:quercetin 3-O-glucosyltransferase activity;MF:quercetin 7-O-glucosyltransferase activity;	------	------	------	------	------	------	gi|75311175|sp|Q9LHJ2.1|U82A1_ARATH;	RecName: Full=UDP-glycosyltransferase 82A1;	PF00201.15	UDPGT	UDP-glucoronosyl and UDP-glucosyl transferase
TRINITY_DN54663_c0_g4	726	0	4.135	2.94		------	------	------	------	------	------	------	------	------	------	------	------	------
TRINITY_DN54676_c2_g2	534	0	4.62	26.115		------	------	------	------	------	------	------	------	------	------	------	------	------
TRINITY_DN54676_c3_g3	1349	372.58	35.895	35.53		------	------	------	------	------	------	------	------	------	------	------	------	------
TRINITY_DN54707_c1_g1	2178	45.35	1.48	3.12	zeaxanthin epoxidase [Gladiolus x hybridus]	GO:0071949	MF:FAD binding;	------	------	------	------	COG0654;COG0654	C:Energy production and conversion;H:Coenzyme transport and metabolism	gi|403399425|sp|B6D1N4.1|HPXO_KLEPN;	RecName: Full=FAD-dependent urate hydroxylase;	PF01494.16;PF05834.9;PF00890.21;PF01266.21;PF07992.11;PF13450.3;PF01946.14	FAD_binding_3;Lycopene_cycl;FAD_binding_2;DAO;Pyr_redox_2;NAD_binding_8;Thi4	FAD binding domain;Lycopene cyclase protein;FAD binding domain;FAD dependent oxidoreductase;Pyridine nucleotide-disulphide oxidoreductase;NA;Thi4 family
TRINITY_DN54711_c2_g2	1720	0.7	19.35	5.51	PREDICTED: HMG-Y-related protein A-like [Musa acuminata subsp. malaccensis]	GO:0006334;GO:0000786;GO:0005634;GO:0003677	BP:nucleosome assembly;CC:nucleosome;CC:nucleus;MF:DNA binding;	------	------	------	------	------	------	gi|1708099|sp|P54671.3|H1_DICDI;	RecName: Full=Histone H1;	PF00538.16	Linker_histone	linker histone H1 and H5 family
TRINITY_DN54762_c4_g10	854	1.395	0	0.07		------	------	------	------	------	------	------	------	------	------	------	------	------
TRINITY_DN54762_c4_g3	2944	1.495	0.14	0.275		------	------	------	------	------	------	------	------	------	------	------	------	------
TRINITY_DN54791_c0_g1	3352	2.63	0.495	0.345	uncharacterized protein LOC109824181 [Asparagus officinalis]	------	------	------	------	------	------	------	------	------	------	PF04782.9;PF04783.9	DUF632;DUF630	Protein of unknown function;Protein of unknown function
TRINITY_DN54822_c3_g1	1230	0	1.595	0.305	protein MAIN-LIKE 2-like [Quercus suber]	------	------	K04460	PPP5C	------	------	------	------	------	------	------	------	------
TRINITY_DN54840_c3_g1	601	2.865	20.16	16.7	65-kDa microtubule-associated protein 6-like [Asparagus officinalis]	GO:0000226;GO:0000226;GO:0008017;GO:0008017	BP:microtubule cytoskeleton organization;BP:microtubule cytoskeleton organization;MF:microtubule binding;MF:microtubule binding;	K16732	PRC1	------	------	------	------	gi|75206162|sp|Q9SIS3.1|MA656_ARATH;	RecName: Full=65-kDa microtubule-associated protein 6; Short=AtMAP65-6;	------	------	------
TRINITY_DN54841_c4_g3	2760	2.515	0.175	0		------	------	------	------	------	------	------	------	------	------	------	------	------
TRINITY_DN54842_c3_g1	1905	21.46	2.27	4.915	PREDICTED: uncharacterized protein LOC105042326 isoform X3 [Elaeis guineensis]	------	------	------	------	------	------	------	------	------	------	PF02450.12;PF11187.5	LCAT;DUF2974	Lecithi;Protein of unknown function
TRINITY_DN54890_c0_g1	2198	2.045	0.185	0.33		------	------	------	------	------	------	------	------	------	------	------	------	------
TRINITY_DN54895_c8_g1	658	22.675	0	0.28	probable mitochondrial-processing peptidase subunit beta, mitochondrial [Ananas comosus]	GO:0046872;GO:0004222	MF:metal ion binding;MF:metalloendopeptidase activity;	------	------	------	------	------	------	------	------	------	------	------
TRINITY_DN54895_c8_g2	649	20.335	1.69	137.41		------	------	------	------	------	------	------	------	------	------	------	------	------
TRINITY_DN54907_c1_g2	2561	317.685	26.5	35	LOW QUALITY PROTEIN: arginine decarboxylase-like [Phalaenopsis equestris]	GO:0006527;GO:0008295;GO:0006527;GO:0008295;GO:0006527;GO:0008295;GO:0008792;GO:0008792;GO:0008792	BP:arginine catabolic process;BP:spermidine biosynthetic process;BP:arginine catabolic process;BP:spermidine biosynthetic process;BP:arginine catabolic process;BP:spermidine biosynthetic process;MF:arginine decarboxylase activity;MF:arginine decarboxylase activity;MF:arginine decarboxylase activity;	K01583	E4.1.1.19	map00330	Arginine and proline metabolism	COG1166	E:Amino acid transport and metabolism	gi|3914997|sp|Q43075.1|SPE1_PEA;	RecName: Full=Arginine decarboxylase; Short=ADC; Short=ARGDC;	PF02784.13;PF00278.19	Orn_Arg_deC_N;Orn_DAP_Arg_deC	Pyridoxal-dependent decarboxylase, pyridoxal binding domain;Pyridoxal-dependent decarboxylase, C-terminal sheet domain
TRINITY_DN54920_c0_g1	1118	14.33	2.735	12.23	Cell number regulator 5 [Apostasia shenzhenica]	GO:0016021;GO:0016021;GO:0016021	CC:integral component of membrane;CC:integral component of membrane;CC:integral component of membrane;	------	------	------	------	------	------	------	------	PF04749.14	PLAC8	PLAC8 family
TRINITY_DN54933_c0_g2	1304	10.35	0	3.69	PREDICTED: uncharacterized protein LOC105044032 [Elaeis guineensis]	GO:0016021;GO:0016021	CC:integral component of membrane;CC:integral component of membrane;	------	------	------	------	------	------	------	------	PF13386.3	DsbD_2	Cytochrome C biogenesis protein transmembrane region
TRINITY_DN54942_c2_g1	1059	1.33	30.67	4.625	uncharacterized protein LOC109843135 [Asparagus officinalis]	------	------	------	------	------	------	------	------	------	------	PF06880.8	DUF1262	Protein of unknown function
TRINITY_DN54954_c0_g1	941	390.925	44.26	245.325	Molecular chaperones HSP70/HSC70, HSP70 superfamily [Handroanthus impetiginosus]	GO:0005524;GO:0005524	MF:ATP binding;MF:ATP binding;	K03283	HSPA1_8	map04144;map04141;map03040	Endocytosis;Protein processing in endoplasmic reticulum;Spliceosome	------	------	gi|123620|sp|P27322.1|HSP72_SOLLC;	RecName: Full=Heat shock cognate 70 kDa protein 2;	PF10712.6;PF00012.17;PF06723.10	NAD-GH;HSP70;MreB_Mbl	NAD-specific glutamate dehydrogenase;Hsp70 protein;MreB/Mbl protein
TRINITY_DN54967_c2_g1	2731	1.215	11.205	17.305	RGS domain-containing serine/threonine-protein kinase A isoform X4 [Asparagus officinalis]	------	------	------	------	------	------	------	------	gi|1169128|sp|Q05609.1|CTR1_ARATH;	RecName: Full=Serine/threonine-protein kinase CTR1; AltName: Full=Protein CONSTITUTIVE TRIPLE RESPONSE1;	PF13426.4;PF00989.22;PF08447.9;PF08448.7;PF13188.4;PF07714.14;PF00069.22	PAS_9;PAS;PAS_3;PAS_4;PAS_8;Pkinase_Tyr;Pkinase	PAS domain;PAS fold;PAS fold;PAS fold;PAS domain;Protein tyrosine kinase;Protein kinase domain
TRINITY_DN55034_c5_g1	1138	0	1.47	0		------	------	------	------	------	------	------	------	------	------	------	------	------
TRINITY_DN55067_c1_g3	744	69.505	9.325	10.165	PREDICTED: 3-ketoacyl-CoA synthase 4-like [Ziziphus jujuba]	GO:0006633;GO:0006633;GO:0006633;GO:0016021;GO:0016021;GO:0016021;GO:0016747;GO:0016747;GO:0016747	BP:fatty acid biosynthetic process;BP:fatty acid biosynthetic process;BP:fatty acid biosynthetic process;CC:integral component of membrane;CC:integral component of membrane;CC:integral component of membrane;MF:transferase activity, transferring acyl groups other than amino-acyl groups;MF:transferase activity, transferring acyl groups other than amino-acyl groups;MF:transferase activity, transferr…	K15397	KCS	map00062	Fatty acid elongation	------	------	gi|75311386|sp|Q9LN49.1|KCS4_ARATH;	RecName: Full=3-ketoacyl-CoA synthase 4; Short=KCS-4; AltName: Full=Very long-chain fatty acid condensing enzyme 4; Short=VLCFA condensing enzyme 4;	PF08392.9	FAE1_CUT1_RppA	FAE1/Type III polyketide synthase-like protein
TRINITY_DN55070_c3_g6	5682	1.405	5.16	4.72	PREDICTED: far upstream element-binding protein 2-like [Phoenix dactylifera]	GO:0003723;GO:0003723;GO:0003723	MF:RNA binding;MF:RNA binding;MF:RNA binding;	------	------	------	------	------	------	------	------	------	------	------
TRINITY_DN55073_c0_g1	3141	4.36	1.105	3.33		------	------	------	------	------	------	------	------	------	------	------	------	------
TRINITY_DN55096_c0_g2	582	18.18	1.135	21.58	L-type lectin-domain containing receptor kinase IV.2-like [Asparagus officinalis]	GO:0016021;GO:0016021;GO:0005524;GO:0030246;GO:0004672;GO:0005524;GO:0030246;GO:0004672;GO:0030246;GO:0016301	CC:integral component of membrane;CC:integral component of membrane;MF:ATP binding;MF:carbohydrate binding;MF:protein kinase activity;MF:ATP binding;MF:carbohydrate binding;MF:protein kinase activity;MF:carbohydrate binding;MF:kinase activity;	------	------	------	------	------	------	gi|75318718|sp|O80939.1|LRK41_ARATH;	RecName: Full=L-type lectin-domain containing receptor kinase IV.1; Short=Arabidopsis thaliana lectin-receptor kinase e; Short=AthlecRK-e; Short=LecRK-IV.1; AltName: Full=Lectin Receptor Kinase 1; Flags: Precursor;	PF00139.16	Lectin_legB	Legume lectin domain
TRINITY_DN55134_c7_g1	1546	0.125	1.75	0.97		------	------	------	------	------	------	------	------	------	------	------	------	------
TRINITY_DN55140_c5_g1	1165	2.455	0.09	0.045		------	------	------	------	------	------	------	------	------	------	------	------	------
TRINITY_DN55169_c1_g3	1378	29.385	3.79	8.845	PREDICTED: UPF0496 protein 1-like [Elaeis guineensis]	GO:0016021;GO:0016021;GO:0016021;GO:0016021	CC:integral component of membrane;CC:integral component of membrane;CC:integral component of membrane;CC:integral component of membrane;	------	------	------	------	------	------	gi|122247414|sp|Q10QE9.1|U496A_ORYSJ;	RecName: Full=UPF0496 protein 1 >gi|158706402|sp|A2XDK8.1|U496A_ORYSI RecName: Full=UPF0496 protein 1;	PF05055.9;PF05633.8	DUF677;DUF793	Protein of unknown function;Protein of unknown function
TRINITY_DN55208_c4_g1	3869	8.775	1.58	2.02	PREDICTED: calmodulin-binding protein 60 A-like [Phoenix dactylifera]	GO:0006950;GO:0005516	BP:response to stress;MF:calmodulin binding;	------	------	------	------	------	------	gi|75171276|sp|Q9FKL6.1|CB60B_ARATH;	RecName: Full=Calmodulin-binding protein 60 B;	PF07887.8	Calmodulin_bind	Calmodulin binding protein-like
TRINITY_DN55221_c0_g1	1502	0.275	6	7.25	PREDICTED: 3'-N-debenzoyl-2'-deoxytaxol N-benzoyltransferase-like [Phoenix dactylifera]	GO:0016747;GO:0016747	MF:transferase activity, transferring acyl groups other than amino-acyl groups;MF:transferase activity, transferring acyl groups other than amino-acyl groups;	------	------	------	------	------	------	gi|28558088|sp|Q8LL69.1|DBNBT_TAXCA;	RecName: Full=3'-N-debenzoyl-2'-deoxytaxol N-benzoyltransferase; Short=DBTNBT [Taxus canadensis];	PF02458.12	Transferase	Transferase family
TRINITY_DN55272_c4_g1	1216	9	0.19	1.415	unnamed protein product [Coffea canephora]	GO:0016021;GO:0016021;GO:0016021;GO:0016021;GO:0016021;GO:0005524;GO:0004672;GO:0005524;GO:0004672;GO:0005524;GO:0004674;GO:0005524;GO:0004674;GO:0005524;GO:0004674	CC:integral component of membrane;CC:integral component of membrane;CC:integral component of membrane;CC:integral component of membrane;CC:integral component of membrane;MF:ATP binding;MF:protein kinase activity;MF:ATP binding;MF:protein kinase activity;MF:ATP binding;MF:protein serine/threonine kinase activity;MF:ATP binding;MF:protein serine/threonine kinase activity;MF:ATP binding;MF:protein s…	------	------	------	------	------	------	------	------	------	------	------
TRINITY_DN55285_c0_g1	3757	45.215	10.9	18.97	probable bifunctional riboflavin biosynthesis protein RIBA 1, chloroplastic [Ananas comosus]	GO:0009231;GO:0009231;GO:0009231;GO:0009231;GO:0008686;GO:0003935;GO:0008686;GO:0003935;GO:0008686;GO:0003935;GO:0008686;GO:0003935	BP:riboflavin biosynthetic process;BP:riboflavin biosynthetic process;BP:riboflavin biosynthetic process;BP:riboflavin biosynthetic process;MF:3,4-dihydroxy-2-butanone-4-phosphate synthase activity;MF:GTP cyclohydrolase II activity;MF:3,4-dihydroxy-2-butanone-4-phosphate synthase activity;MF:GTP cyclohydrolase II activity;MF:3,4-dihydroxy-2-butanone-4-phosphate synthase activity;MF:GTP cyclohydro…	K14652	ribBA	map00740	Riboflavin metabolism	------	------	gi|75225287|sp|Q6Z234.1|RIBA1_ORYSJ;	RecName: Full=Probable bifunctional riboflavin biosynthesis protein RIBA 1, chloroplastic; Short=OsRIBA1; Includes: RecName: Full=3,4-dihydroxy-2-butanone 4-phosphate synthase; Short=DHBP synthase; Includes: RecName: Full=GTP cyclohydrolase-2; AltName: Full=GTP cyclohydrolase II; Flags: Precursor;	PF00926.16;PF00925.17	DHBP_synthase;GTP_cyclohydro2	3,4-dihydroxy-2-butanone 4-phosphate synthase;GTP cyclohydrolase II
TRINITY_DN55301_c4_g1	1506	3.61	0.21	0.19		------	------	------	------	------	------	------	------	------	------	------	------	------
TRINITY_DN55302_c1_g5	1729	6.27	0.085	2.49	PREDICTED: cytochrome P450 714D1 [Elaeis guineensis]	GO:0016021;GO:0020037;GO:0005506;GO:0004497;GO:0016705	CC:integral component of membrane;MF:heme binding;MF:iron ion binding;MF:monooxygenase activity;MF:oxidoreductase activity, acting on paired donors, with incorporation or reduction of molecular oxygen;	K20666;K20663	CYP714D1;CYP714B	------	------	------	------	gi|510791460|sp|B6SSW8.1|C14B3_MAIZE;	RecName: Full=Cytochrome P450 714B3;	PF00067.19	p450	Cytochrome P450
TRINITY_DN55387_c1_g1	537	63.32	10.67	89.51	uncharacterized protein A4U43_C09F16400 [Asparagus officinalis]	GO:0046323;GO:0009737;GO:0009651;GO:0009414;GO:0009737;GO:0009651;GO:0009414;GO:0046323;GO:0009737;GO:0009651;GO:0009414;GO:0016021;GO:0005886;GO:0009506;GO:0016021;GO:0005886;GO:0009506;GO:0016021;GO:0005886;GO:0009506;GO:0005351;GO:0005355;GO:0005358;GO:0005358;GO:0005351;GO:0005355;GO:0005358	BP:glucose import;BP:response to abscisic acid;BP:response to salt stress;BP:response to water deprivation;BP:response to abscisic acid;BP:response to salt stress;BP:response to water deprivation;BP:glucose import;BP:response to abscisic acid;BP:response to salt stress;BP:response to water deprivation;CC:integral component of membrane;CC:plasma membrane;CC:plasmodesma;CC:integral component of mem…	------	------	------	------	------	------	gi|85701281|sp|Q94AZ2.2|STP13_ARATH;	RecName: Full=Sugar transport protein 13; AltName: Full=Hexose transporter 13; AltName: Full=Multicopy suppressor of snf4 deficiency protein 1;	PF00083.21	Sugar_tr	Sugar
TRINITY_DN55387_c1_g3	728	0.385	5.365	9.17	sugar transport protein 8-like [Asparagus officinalis]	GO:0008643;GO:0016021;GO:0016021;GO:0022857;GO:0022857	BP:carbohydrate transport;CC:integral component of membrane;CC:integral component of membrane;MF:transmembrane transporter activity;MF:transmembrane transporter activity;	------	------	------	------	------	------	gi|85701281|sp|Q94AZ2.2|STP13_ARATH;	RecName: Full=Sugar transport protein 13; AltName: Full=Hexose transporter 13; AltName: Full=Multicopy suppressor of snf4 deficiency protein 1;	PF00083.21	Sugar_tr	Sugar
TRINITY_DN55394_c8_g1	749	48.96	5.65	4.905	PREDICTED: beta-amylase 1, chloroplastic [Phoenix dactylifera]	GO:0000272;GO:0000272;GO:0000272;GO:0016161;GO:0016161;GO:0016161	BP:polysaccharide catabolic process;BP:polysaccharide catabolic process;BP:polysaccharide catabolic process;MF:beta-amylase activity;MF:beta-amylase activity;MF:beta-amylase activity;	K01177	E3.2.1.2	map00500	Starch and sucrose metabolism	------	------	gi|75335046|sp|Q9LIR6.1|BAM1_ARATH;	RecName: Full=Beta-amylase 1, chloroplastic; AltName: Full=1,4-alpha-D-glucan maltohydrolase; AltName: Full=Beta-amylase 7; AltName: Full=Thioredoxin-regulated beta-amylase; Short=TR-BAMY; Flags: Precursor;	PF01373.14	Glyco_hydro_14	Glycosyl hydrolase family 14
TRINITY_DN55399_c4_g1	1221	4.2	0	1.41		------	------	------	------	------	------	------	------	------	------	------	------	------
TRINITY_DN55465_c10_g3	710	13.44	0	0.775		------	------	------	------	------	------	------	------	------	------	------	------	------
TRINITY_DN55537_c0_g7	3023	1.97	0.16	0.03		------	------	------	------	------	------	------	------	------	------	------	------	------
TRINITY_DN55559_c2_g2	1603	52.99	13.89	19.525	probable WRKY transcription factor 70 [Asparagus officinalis]	GO:0006351;GO:0006351;GO:0005634;GO:0005634;GO:0003700;GO:0043565;GO:0003700;GO:0043565	BP:transcription, DNA-templated;BP:transcription, DNA-templated;CC:nucleus;CC:nucleus;MF:transcription factor activity, sequence-specific DNA binding;MF:sequence-specific DNA binding;MF:transcription factor activity, sequence-specific DNA binding;MF:sequence-specific DNA binding;	------	------	------	------	------	------	gi|29839674|sp|Q9SHB5.1|WRK55_ARATH;	RecName: Full=WRKY transcription factor 55; AltName: Full=WRKY DNA-binding protein 55;	PF03106.12	WRKY	WRKY DNA -binding domain
TRINITY_DN55564_c0_g3	953	26.11	1.52	4.09	hypothetical protein GOBAR_AA15342 [Gossypium barbadense]	GO:0006351;GO:0006351;GO:0005634;GO:0005634;GO:0003677;GO:0003700;GO:0003677;GO:0003700	BP:transcription, DNA-templated;BP:transcription, DNA-templated;CC:nucleus;CC:nucleus;MF:DNA binding;MF:transcription factor activity, sequence-specific DNA binding;MF:DNA binding;MF:transcription factor activity, sequence-specific DNA binding;	K09287	RAV	------	------	------	------	gi|75340021|sp|P82280.1|RAV2_ARATH;	RecName: Full=AP2/ERF and B3 domain-containing transcription repressor RAV2; AltName: Full=Ethylene-responsive transcription factor RAV2; AltName: Full=Protein RELATED TO ABI3/VP1 2; AltName: Full=Protein RELATED TO APETALA2 8; AltName: Full=Protein TEMPRANILLO 2;	PF02362.18;PF00847.17	B3;AP2	B3 DNA binding domain;AP2 domain
TRINITY_DN55592_c0_g2	566	38.09	7.47	4.67	actin [Oryza sativa Indica Group]	GO:0005737;GO:0005856;GO:0005524;GO:0005524;GO:0005524;GO:0005524	CC:cytoplasm;CC:cytoskeleton;MF:ATP binding;MF:ATP binding;MF:ATP binding;MF:ATP binding;	K05692	ACTB_G1	map04145	Phagosome	------	------	gi|231502|sp|P30170.1|ACT10_SOLTU;	RecName: Full=Actin-85C;	------	------	------
TRINITY_DN55684_c3_g4	1021	0.705	4.795	14.825	PREDICTED: NADPH:quinone oxidoreductase-like [Elaeis guineensis]	GO:0005829;GO:0016491;GO:0010181;GO:0052873	CC:cytosol;MF:oxidoreductase activity;MF:FMN binding;MF:FMN reductas;	------	------	------	------	COG0431	R:General function prediction only	gi|75273736|sp|Q9LK88.1|NQR_ARATH;	RecName: Full=NADPH:quinone oxidoreductase;	PF03358.12;PF02525.14	FMN_red;Flavodoxin_2	NADPH-dependent FMN reductase;Flavodoxin-like fold
TRINITY_DN55746_c1_g2	781	0	3.67	0.42		------	------	------	------	------	------	------	------	------	------	------	------	------
TRINITY_DN55799_c4_g1	3700	0.485	6.01	3.11	PREDICTED: protein BOBBER 1-like [Musa acuminata subsp. malaccensis]	------	------	------	------	------	------	------	------	gi|75264264|sp|Q9LV09.1|BOB1_ARATH;	RecName: Full=Protein BOBBER 1;	------	------	------
TRINITY_DN55813_c1_g1	1678	32.125	4.285	8.995	uncharacterized protein A4U43_C02F1820 [Asparagus officinalis]	GO:0016021;GO:0005524;GO:0042626	CC:integral component of membrane;MF:ATP binding;MF:ATPase activity, coupled to transmembrane movement of substances;	K05658	ABCB1, CD243	map02010	ABC transporters	------	------	gi|75335876|sp|Q9M3B9.1|AB20B_ARATH;	RecName: Full=ABC transporter B family member 20; Short=ABC transporter ABCB.20; Short=AtABCB20; AltName: Full=Multidrug resistance protein 14; AltName: Full=P-glycoprotein 20;	PF00005.24;PF13555.3;PF13191.3	ABC_tran;AAA_29;AAA_16	ABC transporter;P-loop containing region of AAA domain;AAA ATPase domain
TRINITY_DN55825_c1_g4	2423	3.35	1.165	1.845	hypothetical protein CQW23_18144 [Capsicum baccatum]	------	------	K17822	DCUN1D1_2	------	------	------	------	------	------	------	------	------
TRINITY_DN55842_c0_g1	863	0.54	15.44	3.535	PREDICTED: uncharacterized protein LOC103698490 [Phoenix dactylifera]	------	------	------	------	------	------	------	------	------	------	PF04720.9	PDDEXK_6	PDDEXK-like family of unknown function
TRINITY_DN55842_c0_g3	1081	0	2.155	0.805	PREDICTED: uncharacterized protein LOC105038887 [Elaeis guineensis]	------	------	------	------	------	------	------	------	------	------	PF04720.9	PDDEXK_6	PDDEXK-like family of unknown function
TRINITY_DN55843_c3_g9	641	0.065	3.45	3.22		------	------	------	------	------	------	------	------	------	------	------	------	------
TRINITY_DN55850_c1_g3	2185	1.65	0	1.29	uncharacterized protein A4U43_C01F28780 [Asparagus officinalis]	------	------	------	------	------	------	------	------	gi|75319119|sp|P93604.1|LRK10_WHEAT;	RecName: Full=Rust resistance kinase Lr10; AltName: Full=Probable receptor-like serine/threonine-protein kinase LRK10; Flags: Precursor;	PF00069.22;PF07714.14;PF13947.3	Pkinase;Pkinase_Tyr;GUB_WAK_bind	Protein kinase domain;Protein tyrosine kinase;Wall-associated receptor kinase galacturonan-binding
TRINITY_DN55851_c0_g1	740	1.085	24.06	8.09	Chlorophyll a-b binding protein [Actinidia chinensis var. chinensis]	GO:0009765;GO:0018298;GO:0009765;GO:0018298;GO:0009535;GO:0016021;GO:0009522;GO:0009523;GO:0009535;GO:0016021;GO:0009522;GO:0009523;GO:0016168;GO:0016168	BP:photosynthesis, light harvesting;BP:protein-chromophore linkage;BP:photosynthesis, light harvesting;BP:protein-chromophore linkage;CC:chloroplast thylakoid membrane;CC:integral component of membrane;CC:photosystem I;CC:photosystem II;CC:chloroplast thylakoid membrane;CC:integral component of membrane;CC:photosystem I;CC:photosystem II;MF:chlorophyll binding;MF:chlorophyll binding;	K08909	LHCA3	map00196	Photosynthesis - antenna proteins	------	------	gi|115813|sp|P27522.1|CB13_SOLLC;	RecName: Full=Chlorophyll a-b binding protein 8, chloroplastic; AltName: Full=LHCI type III CAB-8; Flags: Precursor;	------	------	------
TRINITY_DN55896_c2_g1	1784	76.52	10.87	25.495	ATP binding protein [Ornithogalum saundersiae]	GO:0005524;GO:0005524	MF:ATP binding;MF:ATP binding;	K08900	BCS1	------	------	COG0465	O:Posttranslational modification, protein turnover, chaperones	gi|75334019|sp|Q9FLD5.1|ASD_ARATH;	RecName: Full=AAA-ATPase ASD, mitochondrial; AltName: Full=AAA-ATPase 1; AltName: Full=Protein ATPASE-IN-SEED-DEVELOPMENT;	PF00004.26;PF05496.9;PF13245.3;PF13191.3;PF13086.3;PF05673.10;PF14363.3	AAA;RuvB_N;AAA_19;AAA_16;AAA_11;DUF815;AAA_assoc	ATPase family associated with various cellular activities;Holliday junction DNA helicase ruvB N-terminus;Part of AAA domain;AAA ATPase domain;AAA domain;Protein of unknown function;Domain associated at C-terminal with AAA
TRINITY_DN55896_c2_g6	1077	0.455	6.155	0.915		------	------	------	------	------	------	------	------	------	------	------	------	------
TRINITY_DN55922_c8_g1	867	17.05	3.49	4.87	PREDICTED: uncharacterized protein LOC105032859 [Elaeis guineensis]	GO:0016491;GO:0016491	MF:oxidoreductase activity;MF:oxidoreductase activity;	------	------	------	------	------	------	------	------	------	------	------
TRINITY_DN55941_c0_g4	667	37.455	2.62	0	receptor kinase-like protein Xa21 [Asparagus officinalis]	GO:0016021;GO:0016301;GO:0016301	CC:integral component of membrane;MF:kinase activity;MF:kinase activity;	------	------	------	------	------	------	gi|264664489|sp|C0LGP4.1|Y3475_ARATH;	RecName: Full=Probable LRR receptor-like serine/threonine-protein kinase At3g47570; Flags: Precursor;	PF13855.3;PF12799.4	LRR_8;LRR_4	Leucine rich repeat;Leucine Rich repeats
TRINITY_DN55942_c4_g1	1515	1.3	5.165	5.535	Adenylate kinase [Macleaya cordata]	GO:0004017;GO:0005524;GO:0004017;GO:0005524	MF:adenylate kinase activity;MF:ATP binding;MF:adenylate kinase activity;MF:ATP binding;	K00939	adk, AK	map00730;map00230	Thiamine metabolism;Purine metabolism	------	------	gi|29427816|sp|Q8HSW1.1|KAD1_SOLTU;	RecName: Full=Adenylate kinase; Short=AK; AltName: Full=ATP-AMP transphosphorylase; AltName: Full=ATP:AMP phosphotransferase; AltName: Full=Adenylate monophosphate kinase;	------	------	------
TRINITY_DN55943_c2_g1	1626	24.97	7.62	29.14	PREDICTED: uncharacterized methyltransferase At1g78140, chloroplastic isoform X3 [Musa acuminata subsp. malaccensis]	GO:0010287;GO:0008168;GO:0008168;GO:0008168	CC:plastoglobule;MF:methyltransferase activity;MF:methyltransferase activity;MF:methyltransferase activity;	------	------	------	------	------	------	gi|75329938|sp|Q8LBV4.1|Y1814_ARATH;	RecName: Full=Uncharacterized methyltransferase At1g78140, chloroplastic; Flags: Precursor;	PF08241.9;PF13649.3;PF13847.3;PF08242.9;PF03141.13;PF13489.3	Methyltransf_11;Methyltransf_25;Methyltransf_31;Methyltransf_12;Methyltransf_29;Methyltransf_23	Methyltransferase domain;Methyltransferase domain;Methyltransferase domain;Methyltransferase domain;Putative S-adenosyl-L-methionine-dependent methyltransferase;Methyltransferase domain
TRINITY_DN56003_c0_g4	636	3.24	15.47	9.265		------	------	------	------	------	------	------	------	------	------	------	------	------
TRINITY_DN56026_c5_g1	646	0	2.465	1.89		------	------	------	------	------	------	------	------	------	------	------	------	------
TRINITY_DN56043_c6_g1	1518	19.855	1.565	1.79		------	------	------	------	------	------	------	------	------	------	------	------	------
TRINITY_DN56051_c3_g4	2086	1.7	0.055	0.045		------	------	------	------	------	------	------	------	------	------	------	------	------
TRINITY_DN56072_c1_g1	454	52.66	3.945	13.885	PREDICTED: putative serine/threonine-protein kinase-like protein CCR3 [Elaeis guineensis]	GO:0016021;GO:0005524;GO:0004672	CC:integral component of membrane;MF:ATP binding;MF:protein kinase activity;	------	------	------	------	------	------	gi|75335634|sp|Q9LY50.1|ACCR3_ARATH;	RecName: Full=Putative serine/threonine-protein kinase-like protein CCR3; AltName: Full=Protein CRINKLY 4 RELATED 3; Short=AtCRR3; Flags: Precursor;	------	------	------
TRINITY_DN56072_c1_g3	2590	78.59	14.57	24.8	PREDICTED: putative serine/threonine-protein kinase-like protein CCR3 [Musa acuminata subsp. malaccensis]	GO:0016021;GO:0005524;GO:0004672	CC:integral component of membrane;MF:ATP binding;MF:protein kinase activity;	------	------	------	------	------	------	gi|75335634|sp|Q9LY50.1|ACCR3_ARATH;	RecName: Full=Putative serine/threonine-protein kinase-like protein CCR3; AltName: Full=Protein CRINKLY 4 RELATED 3; Short=AtCRR3; Flags: Precursor;	PF00069.22;PF07714.14;PF13540.3;PF03109.13	Pkinase;Pkinase_Tyr;RCC1_2;ABC1	Protein kinase domain;Protein tyrosine kinase;Regulator of chromosome condensation;ABC1 family
TRINITY_DN56084_c2_g2	942	19.47	2.37	4.755	PREDICTED: calcium-binding protein CML42-like [Brassica rapa]	GO:0005509;GO:0005509	MF:calcium ion binding;MF:calcium ion binding;	K13448	CML	map04626	Plant-pathogen interaction	------	------	gi|75337714|sp|Q9SVG9.1|CML42_ARATH;	RecName: Full=Calcium-binding protein CML42; AltName: Full=Calmodulin-like protein 42;	PF00036.29;PF13405.3;PF13202.3;PF13499.3	EF-hand_1;EF-hand_6;EF-hand_5;EF-hand_7	EF hand;EF-hand domain;EF hand;EF-hand domain pair
TRINITY_DN56089_c4_g1	1027	5.215	0.215	0.415		------	------	------	------	------	------	------	------	------	------	------	------	------
TRINITY_DN56114_c4_g2	1780	130.27	13.825	35.665	cytochrome P450 71A1-like isoform X1 [Asparagus officinalis]	GO:0020037;GO:0005506;GO:0004497;GO:0016705;GO:0020037;GO:0005506;GO:0004497;GO:0016705	MF:heme binding;MF:iron ion binding;MF:monooxygenase activity;MF:oxidoreductase activity, acting on paired donors, with incorporation or reduction of molecular oxygen;MF:heme binding;MF:iron ion binding;MF:monooxygenase activity;MF:oxidoreductase activity, acting on paired donors, with incorporation or reduction of molecular oxygen;	------	------	------	------	------	------	gi|311033356|sp|P24465.2|C71A1_PERAE;	RecName: Full=Cytochrome P450 71A1; AltName: Full=ARP-2; AltName: Full=CYPLXXIA1 [Persea americana];	PF00067.19	p450	Cytochrome P450
TRINITY_DN56181_c2_g1	839	7.09	0.35	10.105		------	------	------	------	------	------	------	------	------	------	------	------	------
TRINITY_DN56215_c0_g3	2512	128.395	20.82	56.415	carboxyl-terminal-processing peptidase 3, chloroplastic [Asparagus officinalis]	GO:0008236;GO:0008236	MF:serine-type peptidase activity;MF:serine-type peptidase activity;	------	------	------	------	COG0793	M:Cell wall/membrane/envelope biogenesis	gi|657340837|sp|F4J3G5.1|CTPA3_ARATH;	RecName: Full=Carboxyl-terminal-processing peptidase 3, chloroplastic; AltName: Full=D1 C-terminal processing protease 3; AltName: Full=Photosystem II D1 protein processing peptidase 3; Flags: Precursor;	PF00595.21;PF13180.3;PF03572.15	PDZ;PDZ_2;Peptidase_S41	PDZ domain;PDZ domain;Peptidase family S41
TRINITY_DN56234_c1_g1	1819	10.69	0.715	3.675	PREDICTED: uncharacterized protein LOC105056899 [Elaeis guineensis]	GO:0016021	CC:integral component of membrane;	------	------	------	------	------	------	------	------	PF04646.9;PF02434.13	DUF604;Fringe	Protein of unknown function, DUF604;Fringe-like
TRINITY_DN56243_c3_g2	647	76.415	11.11	18.05	LOW QUALITY PROTEIN: U-box domain-containing protein 39-like [Ananas comosus]	GO:0005737;GO:0005634;GO:0004842;GO:0004842;GO:0004842	CC:cytoplasm;CC:nucleus;MF:ubiquitin-protein transferase activity;MF:ubiquitin-protein transferase activity;MF:ubiquitin-protein transferase activity;	------	------	------	------	------	------	gi|334302849|sp|Q9FL17.2|PUB40_ARATH;	RecName: Full=U-box domain-containing protein 40; AltName: Full=Plant U-box protein 40;	PF04564.12	U-box	U-box domain
TRINITY_DN56250_c2_g2	711	1.35	7.71	11.21	PREDICTED: uncharacterized protein LOC105041766 [Elaeis guineensis]	GO:0006412;GO:0006412;GO:0006412;GO:0015934;GO:0015934;GO:0015934;GO:0003735;GO:0003735;GO:0003735	BP:translation;BP:translation;BP:translation;CC:large ribosomal subunit;CC:large ribosomal subunit;CC:large ribosomal subunit;MF:structural constituent of ribosome;MF:structural constituent of ribosome;MF:structural constituent of ribosome;	K02911	RP-L32, MRPL32, rpmF	map03010	Ribosome	------	------	------	------	PF01783.20	Ribosomal_L32p	Ribosomal L32p protein family
TRINITY_DN56250_c3_g1	3886	4.17	0.26	1.37	PREDICTED: uncharacterized protein LOC105046152 [Elaeis guineensis]	GO:0016021;GO:0016021;GO:0005886;GO:0016021;GO:0005886;GO:0022857;GO:0022857	CC:integral component of membrane;CC:integral component of membrane;CC:plasma membrane;CC:integral component of membrane;CC:plasma membrane;MF:transmembrane transporter activity;MF:transmembrane transporter activity;	------	------	------	------	------	------	------	------	PF04632.9;PF13515.3	FUSC;FUSC_2	Fusaric acid resistance protein family;Fusaric acid resistance protein-like
TRINITY_DN56263_c11_g1	1343	4.315	0.105	0.255		------	------	------	------	------	------	------	------	------	------	------	------	------
TRINITY_DN56271_c1_g1	946	0	1.57	0.25		------	------	------	------	------	------	------	------	------	------	------	------	------
TRINITY_DN56284_c1_g3	1317	0.9	4.345	6.05	PREDICTED: uncharacterized protein LOC105041362 isoform X2 [Elaeis guineensis]	------	------	------	------	------	------	------	------	------	------	------	------	------
TRINITY_DN56294_c1_g1	1221	0.765	5.22	5.605	peroxidase 1-like [Asparagus officinalis]	------	------	K00430	E1.11.1.7	map00940	Phenylpropanoid biosynthesis	------	------	gi|114150550|sp|P37834.2|PER1_ORYSJ;	RecName: Full=Peroxidase 1; Flags: Precursor;	PF00141.20	peroxidase	Peroxidase
TRINITY_DN56306_c4_g2	1848	0.355	30.295	14.385	dnaJ homolog subfamily B member 13-like [Asparagus officinalis]	GO:0006457;GO:0006457;GO:0006457;GO:0051082;GO:0051082;GO:0051082	BP:protein folding;BP:protein folding;BP:protein folding;MF:unfolded protein binding;MF:unfolded protein binding;MF:unfolded protein binding;	K09519	DNAJB13	------	------	------	------	gi|62900332|sp|Q9HJ83.1|DNAJ_THEAC;	RecName: Full=Chaperone protein DnaJ;	PF00226.28	DnaJ	DnaJ domain
TRINITY_DN56318_c3_g1	1153	10.89	0.135	0.285		------	------	------	------	------	------	------	------	------	------	------	------	------
TRINITY_DN56330_c3_g1	728	1.47	10.865	7.32	PREDICTED: probable carboxylesterase 17 [Gossypium arboreum]	GO:0008152;GO:0008152;GO:0016787;GO:0016787	BP:metabolic process;BP:metabolic process;MF:hydrolase activity;MF:hydrolase activity;	------	------	------	------	------	------	gi|75334956|sp|Q9LFR7.1|CXE17_ARATH;	RecName: Full=Probable carboxylesterase 17; AltName: Full=AtCXE17;	PF07859.10	Abhydrolase_3	alpha/beta hydrolase fold
TRINITY_DN56338_c10_g2	820	4.375	36.415	26		------	------	------	------	------	------	------	------	------	------	------	------	------
TRINITY_DN56358_c3_g1	262	55.3	391.675	339.985		------	------	------	------	------	------	------	------	------	------	------	------	------
TRINITY_DN56361_c0_g2	4444	8.775	1.34	2.245	PREDICTED: titin homolog [Phoenix dactylifera]	------	------	------	------	------	------	------	------	gi|544602356|sp|Q9FWS1.2|AUL1_ARATH;	RecName: Full=Auxilin-like protein 1;	------	------	------
TRINITY_DN56379_c2_g2	462	0.275	7.555	2.315	PREDICTED: type 1 phosphatases regulator ypi1 [Phoenix dactylifera]	GO:0009793;GO:0032515;GO:0005634;GO:0000164;GO:0004865;GO:0008157;GO:0004865	BP:embryo development ending in seed dormancy;BP:negative regulation of phosphoprotein phosphatase activity;CC:nucleus;CC:protein phosphatase type 1 complex;MF:protein serine/threonine phosphatase inhibitor activity;MF:protein phosphatase 1 binding;MF:protein serine/threonine phosphatase inhibitor activity;	K17553	PPP1R11	------	------	------	------	gi|374095467|sp|A4RD36.2|YPI1_MAGO7;	RecName: Full=Type 1 phosphatases regulator YPI1;	PF07491.8	PPI_Ypi1	Protein phosphatase inhibitor
TRINITY_DN56394_c6_g5	512	13.06	0.71	2.025	uncharacterized protein LOC112196830 [Rosa chinensis]	------	------	------	------	------	------	------	------	------	------	PF04601.10;PF06268.10	DUF569;Fascin	Domain of unknown function;Fascin domain
TRINITY_DN56421_c1_g1	2720	1.52	16.95	1.33	PREDICTED: LOW QUALITY PROTEIN: transketolase, chloroplastic-like [Phoenix dactylifera]	GO:0008152;GO:0004802	BP:metabolic process;MF:transketolase activity;	K00615	E2.2.1.1, tktA, tktB	map00030;map00710	Pentose phosphate pathway;Carbon fixation in photosynthetic organisms	------	------	gi|75247623|sp|Q8RWV0.1|TKTC1_ARATH;	RecName: Full=Transketolase-1, chloroplastic; Short=TK; Flags: Precursor;	PF00456.18;PF02775.18;PF00676.17;PF02779.21;PF02780.17	Transketolase_N;TPP_enzyme_C;E1_dh;Transket_pyr;Transketolase_C	Transketolase, thiamine diphosphate binding domain;Thiamine pyrophosphate enzyme, C-terminal TPP binding domain;Dehydrogenase E1 component;Transketolase, pyrimidine binding domain;Transketolase, C-terminal domain
TRINITY_DN56423_c2_g1	1293	4.425	30.11	20.37	putative glucan endo-1,3-beta-glucosidase GVI [Asparagus officinalis]	GO:0005975;GO:0005975;GO:0004553;GO:0004553	BP:carbohydrate metabolic process;BP:carbohydrate metabolic process;MF:hydrolase activity, hydrolyzing O-glycosyl compounds;MF:hydrolase activity, hydrolyzing O-glycosyl compounds;	------	------	------	------	------	------	gi|585078|sp|Q02439.1|E13F_HORVU;	RecName: Full=Putative glucan endo-1,3-beta-glucosidase GVI; AltName: Full;	PF00332.15	Glyco_hydro_17	Glycosyl hydrolases family 17
TRINITY_DN56464_c2_g1	686	4.425	22.68	26.585	PREDICTED: transcription factor PCL1-like [Phoenix dactylifera]	GO:0006355;GO:0006351;GO:0006355;GO:0006351;GO:0005634;GO:0005634;GO:0003677;GO:0003677	BP:regulation of transcription, DNA-templated;BP:transcription, DNA-templated;BP:regulation of transcription, DNA-templated;BP:transcription, DNA-templated;CC:nucleus;CC:nucleus;MF:DNA binding;MF:DNA binding;	------	------	------	------	------	------	gi|75337463|sp|Q9SNB4.1|PCL1_ARATH;	RecName: Full=Transcription factor LUX; AltName: Full=Protein LUX ARRHYTHMO; AltName: Full=Protein PHYTOCLOCK 1;	------	------	------
TRINITY_DN56464_c2_g2	1020	0.985	11.88	5.94	unnamed protein product, partial [Vitis vinifera]	GO:0006355;GO:0006351;GO:0006355;GO:0006351;GO:0006355;GO:0006351;GO:0005634;GO:0005634;GO:0005634;GO:0003677;GO:0003677;GO:0003677	BP:regulation of transcription, DNA-templated;BP:transcription, DNA-templated;BP:regulation of transcription, DNA-templated;BP:transcription, DNA-templated;BP:regulation of transcription, DNA-templated;BP:transcription, DNA-templated;CC:nucleus;CC:nucleus;CC:nucleus;MF:DNA binding;MF:DNA binding;MF:DNA binding;	------	------	------	------	------	------	gi|75337463|sp|Q9SNB4.1|PCL1_ARATH;	RecName: Full=Transcription factor LUX; AltName: Full=Protein LUX ARRHYTHMO; AltName: Full=Protein PHYTOCLOCK 1;	PF00249.28	Myb_DNA-binding	Myb-like DNA-binding domain
TRINITY_DN56465_c0_g1	685	0.44	4.68	5.17		------	------	------	------	------	------	------	------	------	------	PF03066.12	Nucleoplasmin	Nucleoplasmin
TRINITY_DN56497_c10_g1	2901	0.08	1.79	0.335	cyclin-SDS-like [Asparagus officinalis]	------	------	------	------	------	------	------	------	gi|122247344|sp|Q10PQ9.1|CCSDS_ORYSJ;	RecName: Full=Cyclin-SDS-like; AltName: Full=Protein SOLO DANCERS-like; Short=OsSDS;	PF00134.20;PF02984.16	Cyclin_N;Cyclin_C	Cyclin, N-terminal domain;Cyclin, C-terminal domain
TRINITY_DN56498_c0_g1	851	6.69	0	8.1		------	------	------	------	------	------	------	------	------	------	------	------	------
TRINITY_DN56523_c2_g2	1315	36.59	225.565	82.005	protein trichome birefringence-like 38 [Asparagus officinalis]	------	------	------	------	------	------	------	------	gi|75161403|sp|Q8VY22.1|TBL38_ARATH;	RecName: Full=Protein trichome birefringence-like 38;	PF13839.3;PF14416.3	PC-Esterase;PMR5N	GDSL/SGNH-like Acyl-Esterase family found in Pmr5 and Cas1p;PMR5 N terminal Domain
TRINITY_DN56530_c3_g3	442	3.985	23.18	9.645		------	------	------	------	------	------	------	------	------	------	------	------	------
TRINITY_DN56533_c1_g4	847	17.01	1.63	2.87	uncharacterized protein A4U43_C08F26880 [Asparagus officinalis]	GO:0005524;GO:0004672	MF:ATP binding;MF:protein kinase activity;	------	------	------	------	COG0515	T:Signal transduction mechanisms	gi|75328961|sp|Q8GXZ3.1|Y5102_ARATH;	RecName: Full=Serine/threonine-protein kinase At5g01020;	PF07714.14;PF00069.22	Pkinase_Tyr;Pkinase	Protein tyrosine kinase;Protein kinase domain
TRINITY_DN56536_c5_g1	674	0.67	9.355	2.305		------	------	------	------	------	------	------	------	------	------	------	------	------
TRINITY_DN56545_c3_g1	759	18.73	1.415	1.72	PREDICTED: uncharacterized protein LOC105045143 [Elaeis guineensis]	------	------	------	------	------	------	------	------	------	------	------	------	------
TRINITY_DN56546_c4_g2	949	676.19	30.31	53.885	aquaporin SIP1-2-like [Dendrobium catenatum]	GO:0016021;GO:0016021;GO:0015267;GO:0015267	CC:integral component of membrane;CC:integral component of membrane;MF:channel activity;MF:channel activity;	K09875	SIP	------	------	------	------	gi|75308069|sp|Q9ATM3.1|SIP11_MAIZE;	RecName: Full=Aquaporin SIP1-1; AltName: Full=Small basic intrinsic protein 1-1; AltName: Full=ZmSIP1-1; AltName: Full=ZmSIP1;1;	PF00230.17	MIP	Major intrinsic protein
TRINITY_DN56576_c2_g2	685	16.955	0.555	2.555	PREDICTED: receptor-like protein kinase HAIKU2 [Elaeis guineensis]	GO:0016021;GO:0016021;GO:0005524;GO:0004674;GO:0005524;GO:0004674	CC:integral component of membrane;CC:integral component of membrane;MF:ATP binding;MF:protein serine/threonine kinase activity;MF:ATP binding;MF:protein serine/threonine kinase activity;	------	------	------	------	------	------	gi|75273596|sp|Q9LJM4.1|IKU2_ARATH;	RecName: Full=Receptor-like protein kinase HAIKU2; Flags: Precursor;	PF00069.22;PF07714.14	Pkinase;Pkinase_Tyr	Protein kinase domain;Protein tyrosine kinase
TRINITY_DN56581_c2_g2	499	47.805	338.385	281.935	hypothetical protein CDL15_Pgr028923 [Punica granatum]	GO:0006260;GO:0005634;GO:0003677	BP:DNA replication;CC:nucleus;MF:DNA binding;	------	------	------	------	------	------	------	------	PF06596.8	PsbX	Photosystem II reaction centre X protein
TRINITY_DN56586_c3_g1	1950	55.075	6.045	15.585	hypothetical protein AQUCO_04200190v1 [Aquilegia coerulea]	GO:0016021;GO:0005887;GO:0043231;GO:0005524;GO:0005388;GO:0005516;GO:0005524;GO:0005388;GO:0005516	CC:integral component of membrane;CC:integral component of plasma membrane;CC:intracellular membrane-bounded organelle;MF:ATP binding;MF:calcium-transporting ATPase activity;MF:calmodulin binding;MF:ATP binding;MF:calcium-transporting ATPase activity;MF:calmodulin binding;	K01537	E3.6.3.8	------	------	------	------	gi|110832727|sp|Q2QMX9.1|ACA1_ORYSJ;	RecName: Full=Calcium-transporting ATPase 1, plasma membrane-type; AltName: Full=C;	PF00702.23;PF08282.9	Hydrolase;Hydrolase_3	haloacid dehalogenase-like hydrolase;haloacid dehalogenase-like hydrolase
TRINITY_DN56586_c3_g2	1604	1.89	0.06	0.695	PREDICTED: calcium-transporting ATPase 2, plasma membrane-type-like [Ipomoea nil]	------	------	K01537	E3.6.3.8	------	------	------	------	gi|12229639|sp|O81108.1|ACA2_ARATH;	RecName: Full=Calcium-transporting ATPase 2, plasma membrane-type; AltName: Full=C;	------	------	------
TRINITY_DN56588_c2_g2	1314	0	1.645	1.165		------	------	------	------	------	------	------	------	------	------	------	------	------
TRINITY_DN56610_c1_g2	2333	0.795	4.615	2.66	PREDICTED: pentatricopeptide repeat-containing protein At4g33170-like [Phoenix dactylifera]	------	------	------	------	------	------	------	------	gi|75274142|sp|Q9LTV8.1|PP224_ARATH;	RecName: Full=Pentatricopeptide repeat-containing protein At3g12770;	PF01535.17;PF13041.3;PF12854.4;PF13812.3	PPR;PPR_2;PPR_1;PPR_3	PPR repeat;PPR repeat family;PPR repeat;Pentatricopeptide repeat domain
TRINITY_DN56611_c0_g6	897	0.35	3.925	1.35		------	------	------	------	------	------	------	------	------	------	------	------	------
TRINITY_DN56612_c4_g1	2722	208.43	13.705	11.025	calcium-dependent protein kinase 16 isoform X2 [Morus notabilis]	GO:0005524;GO:0005509;GO:0004672;GO:0005524;GO:0005509;GO:0004683	MF:ATP binding;MF:calcium ion binding;MF:protein kinase activity;MF:ATP binding;MF:calcium ion binding;MF:calmodulin-dependent protein kinase activity;	K13412	CPK	map04626	Plant-pathogen interaction	------	------	gi|75327228|sp|Q7XJR9.1|CDPKG_ARATH;	RecName: Full=Calcium-dependent protein kinase 16;	------	------	------
TRINITY_DN56624_c1_g1	816	0	3.415	0	PREDICTED: non-specific lipid-transfer protein-like protein At2g13820 [Raphanus sativus]	------	------	------	------	------	------	------	------	gi|75216245|sp|Q9ZQI8.1|NLTL2_ARATH;	RecName: Full=Non-specific lipid-transfer protein-like protein At2g13820; Flags: Precursor;	PF14368.3;PF00234.19	LTP_2;Tryp_alpha_amyl	Probable lipid transfer;Protease inhibitor/seed storage/LTP family
TRINITY_DN56633_c4_g1	645	1.485	10.115	5.715		------	------	------	------	------	------	------	------	------	------	------	------	------
TRINITY_DN56668_c2_g8	661	4.925	0.055	1.075	PREDICTED: probable LRR receptor-like serine/threonine-protein kinase At3g47570 [Phoenix dactylifera]	GO:0016021;GO:0005524;GO:0004674	CC:integral component of membrane;MF:ATP binding;MF:protein serine/threonine kinase activity;	------	------	------	------	------	------	gi|263419078|sp|C0LGT6.1|EFR_ARATH;	RecName: Full=LRR receptor-like serine/threonine-protein kinase EFR; AltName: Full=Elongation factor Tu receptor; Short=EF-Tu receptor; Flags: Precursor;	PF13855.3;PF12799.4	LRR_8;LRR_4	Leucine rich repeat;Leucine Rich repeats
TRINITY_DN56672_c0_g1	2703	5.655	231.745	78.22	probable beta-D-xylosidase 7 [Asparagus officinalis]	GO:0005975;GO:0005975;GO:0004553;GO:0004553	BP:carbohydrate metabolic process;BP:carbohydrate metabolic process;MF:hydrolase activity, hydrolyzing O-glycosyl compounds;MF:hydrolase activity, hydrolyzing O-glycosyl compounds;	------	------	------	------	COG1472	G:Carbohydrate transport and metabolism	gi|259585708|sp|Q9SGZ5.2|BXL7_ARATH;	RecName: Full=Probable beta-D-xylosidase 7; Short=AtBXL7; Flags: Precursor;	PF01915.19;PF00933.18;PF14310.3	Glyco_hydro_3_C;Glyco_hydro_3;Fn3-like	Glycosyl hydrolase family 3 C-terminal domain;Glycosyl hydrolase family 3 N terminal domain;Fibronectin type III-like domain
TRINITY_DN56697_c3_g1	505	0	4.05	1.43		------	------	------	------	------	------	------	------	------	------	------	------	------
TRINITY_DN56698_c2_g1	1202	0	0.845	0.545		------	------	------	------	------	------	------	------	------	------	------	------	------
TRINITY_DN56709_c3_g1	1501	1.075	6.515	7.51	uncharacterized protein A4U43_C06F4040 [Asparagus officinalis]	------	------	K20623	CYP92A6	map00905	Brassinosteroid biosynthesis	------	------	gi|75319886|sp|Q50EK4.1|C75A1_PINTA;	RecName: Full=Cytochrome P450 750A1; AltName: Full=Cytochrome P450 CYPC [Pinus taeda];	------	------	------
TRINITY_DN56715_c1_g3	832	0	1.68	0.555	PREDICTED: transcription factor bHLH130-like [Phoenix dactylifera]	GO:0046983;GO:0046983;GO:0046983	MF:protein dimerization activity;MF:protein dimerization activity;MF:protein dimerization activity;	------	------	------	------	------	------	gi|75288858|sp|Q66GR3.1|BH130_ARATH;	RecName: Full=Transcription factor bHLH130; AltName: Full=Basic helix-loop-helix protein 130; Short=AtbHLH130; Short=bHLH 130; AltName: Full=Transcription factor EN 69; AltName: Full=bHLH transcription factor bHLH130;	------	------	------
TRINITY_DN56743_c5_g1	465	0	7.31	3.215		------	------	------	------	------	------	------	------	------	------	------	------	------
TRINITY_DN56743_c7_g1	518	8.84	0	1.51		------	------	------	------	------	------	------	------	------	------	------	------	------
TRINITY_DN56743_c7_g3	742	1.14	9.845	3.12	Protein LOL1 [Dendrobium catenatum]	------	------	------	------	------	------	------	------	gi|75163743|sp|Q93ZB1.1|LOL1_ARATH;	RecName: Full=Protein LOL1; AltName: Full=Protein LSD ONE LIKE 1; Short=AtLOL1; AltName: Full=Putative zinc finger LOL1;	------	------	------
TRINITY_DN56744_c3_g1	3436	1.725	0.23	0.345	Retrovirus-related Pol polyprotein from transposon TNT 1-94 [Cajanus cajan]	GO:0015074;GO:0015074;GO:0015074;GO:0015074;GO:0006281;GO:0015074;GO:0016021;GO:0003676;GO:0008270;GO:0004491;GO:0003676;GO:0008270;GO:0003676;GO:0005524;GO:0003677;GO:0008094;GO:0003676	BP:DNA integration;BP:DNA integration;BP:DNA integration;BP:DNA integration;BP:DNA repair;BP:DNA integration;CC:integral component of membrane;MF:nucleic acid binding;MF:zinc ion binding;MF:methylmalonate-semialdehyde dehydrogenas;MF:nucleic acid binding;MF:zinc ion binding;MF:nucleic acid binding;MF:ATP binding;MF:DNA binding;MF:DNA-dependent ATPase activity;MF:nucleic acid binding;	K05674;K20477	RGP1;ABCC10	map02010	ABC transporters	------	------	gi|130582|sp|P10978.1|POLX_TOBAC;	RecName: Full=Retrovirus-related Pol polyprotein from transposon TNT 1-94; Includes: RecName: Full=Protease; Includes: RecName: Full=Reverse transcriptase; Includes: RecName: Full=Endonuclease;	------	------	------
TRINITY_DN56760_c8_g1	1268	0.615	4.265	4.71		------	------	------	------	------	------	------	------	------	------	------	------	------
TRINITY_DN56842_c1_g1	771	0.045	3.675	0.46	PREDICTED: RING-H2 finger protein ATL16-like [Phoenix dactylifera]	GO:0016021;GO:0016021;GO:0016874	CC:integral component of membrane;CC:integral component of membrane;MF:ligase activity;	------	------	------	------	------	------	gi|68565292|sp|Q9FLC6.1|ATL73_ARATH;	RecName: Full=RING-H2 finger protein ATL73; Flags: Precursor;	PF13639.3;PF17123.2;PF13923.3;PF12678.4;PF00097.22;PF14634.3;PF13445.3	zf-RING_2;zf-RING_11;zf-C3HC4_2;zf-rbx1;zf-C3HC4;zf-RING_5;zf-RING_UBOX	Ring finger domain;RING-like zinc finger;Zinc finger, C3HC4 type;RING-H2 zinc finger domain;Zinc finger, C3HC4 type;zinc-RING finger domain;RING-type zinc-finger
TRINITY_DN56856_c2_g1	1186	15.62	1.07	1.615	PREDICTED: uncharacterized protein LOC103696844 [Phoenix dactylifera]	------	------	------	------	------	------	------	------	------	------	PF07279.8;PF13460.3;PF13578.3	DUF1442;NAD_binding_10;Methyltransf_24	Protein of unknown function;NA;Methyltransferase domain
TRINITY_DN56920_c6_g1	3415	0	1.94	1.565	hypothetical protein BVC80_8823g15 [Macleaya cordata]	------	------	------	------	------	------	------	------	------	------	------	------	------
TRINITY_DN56933_c1_g1	1110	35.065	0.125	9.305		------	------	------	------	------	------	------	------	------	------	------	------	------
TRINITY_DN56964_c5_g2	1000	3.75	92.13	15.705	PREDICTED: alpha carbonic anhydrase 7-like [Phoenix dactylifera]	GO:0006730;GO:0006730;GO:0006730;GO:0004089;GO:0008270;GO:0004089;GO:0008270;GO:0004089;GO:0008270	BP:one-carbon metabolic process;BP:one-carbon metabolic process;BP:one-carbon metabolic process;MF:carbonate dehydratase activity;MF:zinc ion binding;MF:carbonate dehydratase activity;MF:zinc ion binding;MF:carbonate dehydratase activity;MF:zinc ion binding;	K01674	cah	map00910	Nitrogen metabolism	------	------	gi|75154272|sp|Q8L817.1|ATCA7_ARATH;	RecName: Full=Alpha carbonic anhydrase 7; Short=AtaCA7; Short=AtalphaCA7; AltName: Full=Alpha carbonate dehydratase 7; Flags: Precursor;	PF00194.18	Carb_anhydrase	Eukaryotic-type carbonic anhydrase
TRINITY_DN56969_c7_g2	2747	96.63	11.245	13.2	hypothetical protein CDL12_04614 [Handroanthus impetiginosus]	GO:0016021;GO:0046983;GO:0046983	CC:integral component of membrane;MF:protein dimerization activity;MF:protein dimerization activity;	------	------	------	------	------	------	------	------	------	------	------
TRINITY_DN56996_c1_g1	2581	5.485	30.055	32.39	two-component response regulator-like APRR3 [Asparagus officinalis]	GO:0000160;GO:0000160;GO:0000160;GO:0005634;GO:0005634;GO:0005634	BP:phosphorelay signal transduction system;BP:phosphorelay signal transduction system;BP:phosphorelay signal transduction system;CC:nucleus;CC:nucleus;CC:nucleus;	K12130	PRR5	map04712	Circadian rhythm - plant	------	------	gi|52783225|sp|Q6LA42.2|APRR5_ARATH;	RecName: Full=Two-component response regulator-like APRR5; AltName: Full=Pseudo-response regulator 5;	PF00072.21;PF06203.11	Response_reg;CCT	Response regulator receiver domain;CCT motif
TRINITY_DN56996_c1_g3	1009	0.455	5.63	2.045	two-component response regulator-like APRR3 isoform X1 [Ananas comosus]	GO:0000160;GO:0005634	BP:phosphorelay signal transduction system;CC:nucleus;	K12130	PRR5	map04712	Circadian rhythm - plant	------	------	gi|52783225|sp|Q6LA42.2|APRR5_ARATH;	RecName: Full=Two-component response regulator-like APRR5; AltName: Full=Pseudo-response regulator 5;	PF00072.21	Response_reg	Response regulator receiver domain
TRINITY_DN57011_c1_g1	1178	0.15	3.325	1.205	Mlo-related protein [Macleaya cordata]	GO:0006952;GO:0009607;GO:0006952;GO:0009607;GO:0006952;GO:0009607;GO:0016021;GO:0016021;GO:0016021;GO:0005516;GO:0005516;GO:0005516	BP:defense response;BP:response to biotic stimulus;BP:defense response;BP:response to biotic stimulus;BP:defense response;BP:response to biotic stimulus;CC:integral component of membrane;CC:integral component of membrane;CC:integral component of membrane;MF:calmodulin binding;MF:calmodulin binding;MF:calmodulin binding;	K08472	MLO	------	------	------	------	gi|33112637|sp|O23693.2|MLO4_ARATH;	RecName: Full=MLO-like protein 4; Short=AtMlo4;	PF03094.12	Mlo	Mlo family
TRINITY_DN57042_c0_g1	882	0.4	15.615	0.505	PREDICTED: uncharacterized protein LOC103989860 [Musa acuminata subsp. malaccensis]	GO:0016021;GO:0016021	CC:integral component of membrane;CC:integral component of membrane;	------	------	------	------	------	------	------	------	PF05553.8	DUF761	Cotton fibre expressed protein
TRINITY_DN57150_c6_g1	2647	0.01	14.51	6.29	Protein LOL1 [Dendrobium catenatum]	------	------	------	------	------	------	------	------	gi|122222103|sp|Q0J7V9.1|LSD1_ORYSJ;	RecName: Full=Protein LSD1; AltName: Full=Protein LESION SIMULATING DISEASE 1; Short=OsLSD1; AltName: Full=Putative zinc finger LSD1;	PF06943.9	zf-LSD1	LSD1 zinc finger
TRINITY_DN57177_c2_g1	1287	0.15	1.9	0.12		------	------	------	------	------	------	------	------	------	------	------	------	------
TRINITY_DN57184_c5_g1	1662	0.08	1.025	1.73	Pentatricopeptide repeat-containing protein [Zostera marina]	GO:0008168	MF:methyltransferase activity;	------	------	------	------	------	------	gi|122215618|sp|Q3EDF8.1|PPR28_ARATH;	RecName: Full=Pentatricopeptide repeat-containing protein At1g09900;	PF13041.3;PF12854.4;PF01535.17	PPR_2;PPR_1;PPR	PPR repeat family;PPR repeat;PPR repeat
TRINITY_DN57247_c3_g1	1355	0.505	4.56	8.485	Reverse transcriptase zinc-binding domain [Macleaya cordata]	GO:0003676;GO:0003964;GO:0003676;GO:0003964;GO:0003676;GO:0003964;GO:0003676;GO:0003964;GO:0003676;GO:0003964	MF:nucleic acid binding;MF:RNA-directed DNA polymerase activity;MF:nucleic acid binding;MF:RNA-directed DNA polymerase activity;MF:nucleic acid binding;MF:RNA-directed DNA polymerase activity;MF:nucleic acid binding;MF:RNA-directed DNA polymerase activity;MF:nucleic acid binding;MF:RNA-directed DNA polymerase activity;	------	------	------	------	------	------	------	------	PF13456.3	RVT_3	Reverse transcriptase-like
TRINITY_DN57247_c3_g2	833	2.335	0	0.28	Ribonuclease H domain [Macleaya cordata]	GO:0003676;GO:0004523;GO:0003676;GO:0003964;GO:0003676;GO:0004523;GO:0003676;GO:0003676;GO:0003964	MF:nucleic acid binding;MF:RNA-DNA hybrid ribonuclease activity;MF:nucleic acid binding;MF:RNA-directed DNA polymerase activity;MF:nucleic acid binding;MF:RNA-DNA hybrid ribonuclease activity;MF:nucleic acid binding;MF:nucleic acid binding;MF:RNA-directed DNA polymerase activity;	------	------	------	------	------	------	------	------	------	------	------
TRINITY_DN57252_c2_g1	1007	4.31	0.125	2.12		------	------	------	------	------	------	------	------	------	------	PF08879.7	WRC	WRC
TRINITY_DN57252_c2_g2	2410	5.88	0.45	1.71	PREDICTED: LOW QUALITY PROTEIN: lysine-specific demethylase JMJ25-like [Phoenix dactylifera]	GO:0008168	MF:methyltransferase activity;	K15601	KDM3	------	------	------	------	gi|75207508|sp|Q9SSE9.1|JMJ25_ARATH;	RecName: Full=Lysine-specific demethylase JMJ25; AltName: Full=Jumonji domain-containing protein 25; AltName: Full=Lysine-specific histone demethylase JMJ25; AltName: Full=Protein INCREASE IN BONSAI METHYLATION 1; AltName: Full=Protein JUMONJI 25;	PF10497.6;PF00665.23;PF13976.3	zf-4CXXC_R1;rve;gag_pre-integrs	Zinc-finger domain of monoamine-oxidase A repressor R1;Integrase core domain;GAG-pre-integrase domain
TRINITY_DN57295_c4_g1	1069	7.655	2.41	2.275		------	------	------	------	------	------	------	------	------	------	------	------	------
TRINITY_DN57313_c3_g1	561	34.555	1.315	38.005	PREDICTED: receptor kinase-like protein Xa21 [Elaeis guineensis]	GO:0016021;GO:0032440;GO:0005524;GO:0004672	CC:integral component of membrane;MF:2-alkenal reductase [NA;MF:ATP binding;MF:protein kinase activity;	------	------	------	------	------	------	gi|263419078|sp|C0LGT6.1|EFR_ARATH;	RecName: Full=LRR receptor-like serine/threonine-protein kinase EFR; AltName: Full=Elongation factor Tu receptor; Short=EF-Tu receptor; Flags: Precursor;	PF13855.3;PF12799.4;PF08263.9	LRR_8;LRR_4;LRRNT_2	Leucine rich repeat;Leucine Rich repeats;Leucine rich repeat N-terminal domain
TRINITY_DN57331_c1_g1	2149	47.485	6.005	8		------	------	------	------	------	------	------	------	------	------	------	------	------
TRINITY_DN57370_c0_g2	2785	0.13	1.385	1.145	PREDICTED: cation/	GO:0016021;GO:0015299	CC:integral component of membrane;MF:solut;	------	------	------	------	COG0475	P:Inorganic ion transport and metabolism	gi|75311599|sp|Q9LUN4.1|CHX19_ARATH;	RecName: Full=Cation/;	PF00999.18	Na_H_Exchanger	Sodium/hydrogen exchanger family
TRINITY_DN57393_c1_g2	1299	19.355	4.455	13.475	PREDICTED: calponin homology domain-containing protein DDB_G0272472 [Elaeis guineensis]	GO:0051087	MF:chaperone binding;	------	------	------	------	------	------	gi|75219931|sp|O65373.1|BAG5_ARATH;	RecName: Full=BAG family molecular chaperone regulator 5, mitochondrial; AltName: Full=Bcl-2-associated athanogene 5; Flags: Precursor;	PF02179.13;PF00612.24	BAG;IQ	BAG domain;IQ calmodulin-binding motif
TRINITY_DN57394_c2_g1	2231	0	0.495	0.845	Vesicle-associated protein 2-2 [Apostasia shenzhenica]	GO:0005789;GO:0016021;GO:0005789;GO:0016021;GO:0005789;GO:0016021;GO:0005789;GO:0016021	CC:endoplasmic reticulum membrane;CC:integral component of membrane;CC:endoplasmic reticulum membrane;CC:integral component of membrane;CC:endoplasmic reticulum membrane;CC:integral component of membrane;CC:endoplasmic reticulum membrane;CC:integral component of membrane;	------	------	------	------	------	------	------	------	------	------	------
TRINITY_DN57411_c1_g2	1551	3.74	0.755	1.62		------	------	------	------	------	------	------	------	------	------	------	------	------
TRINITY_DN57429_c2_g1	583	0	8.095	5.42		------	------	------	------	------	------	------	------	------	------	------	------	------
TRINITY_DN57429_c2_g2	1495	3.93	0.625	0.395		------	------	------	------	------	------	------	------	------	------	------	------	------
TRINITY_DN57431_c3_g1	2235	2.55	0.195	0.57		------	------	------	------	------	------	------	------	------	------	------	------	------
TRINITY_DN57490_c4_g4	3008	1.445	0.16	0.365		------	------	------	------	------	------	------	------	------	------	------	------	------
TRINITY_DN57501_c0_g3	1623	0.175	8.64	7.965	PREDICTED: polygalacturonase At1g48100-like [Elaeis guineensis]	GO:0005975;GO:0071555;GO:0005975;GO:0071555;GO:0005576;GO:0005576;GO:0004650;GO:0004650	BP:carbohydrate metabolic process;BP:cell wall organization;BP:carbohydrate metabolic process;BP:cell wall organization;CC:extracellular region;CC:extracellular region;MF:polygalacturonase activity;MF:polygalacturonase activity;	K01184	E3.2.1.15	map00040	Pentose and glucuronate interconversions	------	------	gi|75306312|sp|Q949Z1.1|PGLR4_ARATH;	RecName: Full=Polygalacturonase At1g48100; Short=PG; AltName: Full=Pectinase At1g48100; Flags: Precursor;	PF00295.14;PF12708.4;PF13229.3	Glyco_hydro_28;Pectate_lyase_3;Beta_helix	Glycosyl hydrolases family 28;Pectate lyase superfamily protein;Right handed beta helix region
TRINITY_DN57505_c3_g2	2688	11.82	2.36	2.26	LOW QUALITY PROTEIN: protein ARABIDILLO 1-like [Asparagus officinalis]	------	------	------	------	------	------	------	------	gi|75219086|sp|O22161.1|ADLO1_ARATH;	RecName: Full=Protein ARABIDILLO 1; AltName: Full=F-box only protein 5;	------	------	------
TRINITY_DN57523_c0_g1	539	86.84	15.925	68.77	L-type lectin-domain containing receptor kinase IV.1-like [Rosa chinensis]	GO:0016021;GO:0005524;GO:0030246;GO:0004672	CC:integral component of membrane;MF:ATP binding;MF:carbohydrate binding;MF:protein kinase activity;	------	------	------	------	------	------	gi|75335868|sp|Q9M345.1|LRK42_ARATH;	RecName: Full=L-type lectin-domain containing receptor kinase IV.2; Short=Arabidopsis thaliana lectin-receptor kinase a4; Short=AthlecRK-a4; Short=LecRK-IV.2; AltName: Full=Protein SMALL, GLUED-TOGETHER, AND COLLAPSED POLLEN; Flags: Precursor;	PF07714.14;PF00069.22	Pkinase_Tyr;Pkinase	Protein tyrosine kinase;Protein kinase domain
TRINITY_DN57539_c3_g1	1264	0.065	2.22	0.385	uncharacterized protein LOC109841729 [Asparagus officinalis]	------	------	------	------	------	------	------	------	------	------	------	------	------
TRINITY_DN57548_c1_g1	1323	0.98	16.59	3.285	uncharacterized protein LOC109843135 [Asparagus officinalis]	------	------	------	------	------	------	------	------	------	------	PF06880.8	DUF1262	Protein of unknown function
TRINITY_DN57549_c0_g3	1476	75.25	20.09	15.29	receptor-like protein kinase FERONIA [Asparagus officinalis]	GO:0042254;GO:0016021;GO:0016021;GO:0005634;GO:0005524;GO:0004672;GO:0005524;GO:0005525;GO:0004672	BP:ribosome biogenesis;CC:integral component of membrane;CC:integral component of membrane;CC:nucleus;MF:ATP binding;MF:protein kinase activity;MF:ATP binding;MF:GTP binding;MF:protein kinase activity;	------	------	------	------	------	------	gi|75337066|sp|Q9SCZ4.1|FERON_ARATH;	RecName: Full=Receptor-like protein kinase FERONIA; AltName: Full=Protein SIRENE; Flags: Precursor;	PF07714.14;PF00069.22	Pkinase_Tyr;Pkinase	Protein tyrosine kinase;Protein kinase domain
TRINITY_DN57571_c0_g5	785	7.775	1.48	2.14	putative UPF0481 protein [Ananas comosus]	GO:0016021;GO:0016021;GO:0016021	CC:integral component of membrane;CC:integral component of membrane;CC:integral component of membrane;	------	------	------	------	------	------	------	------	PF03140.12	DUF247	Plant protein of unknown function
TRINITY_DN57589_c0_g1	653	17.48	2.19	4.36	LOW QUALITY PROTEIN: receptor-like protein kinase HAIKU2 [Ananas comosus]	GO:0016021;GO:0005524;GO:0004674	CC:integral component of membrane;MF:ATP binding;MF:protein serine/threonine kinase activity;	------	------	------	------	------	------	gi|75273596|sp|Q9LJM4.1|IKU2_ARATH;	RecName: Full=Receptor-like protein kinase HAIKU2; Flags: Precursor;	PF07714.14;PF00069.22	Pkinase_Tyr;Pkinase	Protein tyrosine kinase;Protein kinase domain
TRINITY_DN57662_c1_g3	2566	4.285	0.99	1.14	alpha-1,4 glucan phosphorylase L-2 isozyme, chloroplastic/amyloplastic [Jatropha curcas]	GO:0005975;GO:0005980;GO:0005975;GO:0005737;GO:0008184;GO:0030170;GO:0008184;GO:0030170;GO:0008184;GO:0030170	BP:carbohydrate metabolic process;BP:glycogen catabolic process;BP:carbohydrate metabolic process;CC:cytoplasm;MF:glycogen phosphorylase activity;MF:pyridoxal phosphate binding;MF:glycogen phosphorylase activity;MF:pyridoxal phosphate binding;MF:glycogen phosphorylase activity;MF:pyridoxal phosphate binding;	K00688	PYG, glgP	map00500	Starch and sucrose metabolism	------	------	gi|130173|sp|P04045.2|PHSL1_SOLTU;	RecName: Full=Alpha-1,4 glucan phosphorylase L-1 isozyme, chloroplastic/amyloplastic; AltName: Full=Starch phosphorylase L-1; Flags: Precursor;	PF00343.17	Phosphorylase	Carbohydrate phosphorylase
TRINITY_DN57679_c2_g2	726	0.285	5.755	4.8	PREDICTED: myb-related protein P-like [Nelumbo nucifera]	GO:0003677;GO:0003677	MF:DNA binding;MF:DNA binding;	K09422	MYBP	------	------	------	------	gi|75317981|sp|O22264.1|MYB12_ARATH;	RecName: Full=Transcription factor MYB12; AltName: Full=Myb-related protein 12; Short=AtMYB12;	PF00249.28	Myb_DNA-binding	Myb-like DNA-binding domain
TRINITY_DN57717_c5_g4	384	1.845	22.795	17.54	uncharacterized protein LOC109839678 [Asparagus officinalis]	GO:0016874	MF:ligase activity;	------	------	------	------	------	------	------	------	------	------	------
TRINITY_DN57795_c1_g6	886	189.87	33.805	37.835	Heat stress transcription factor A-4b like [Actinidia chinensis var. chinensis]	GO:0005634;GO:0003700;GO:0043565	CC:nucleus;MF:transcription factor activity, sequence-specific DNA binding;MF:sequence-specific DNA binding;	K09419	HSFF	------	------	------	------	gi|11386827|sp|Q40152.1|HSF8_SOLLC;	RecName: Full=Heat shock factor protein HSF8; AltName: Full=Heat shock transcription factor 8; Short=HSTF 8; AltName: Full=Heat stress transcription factor;	PF00447.14	HSF_DNA-bind	HSF-type DNA-binding
TRINITY_DN57799_c1_g1	472	0.13	15.375	8.62		------	------	------	------	------	------	------	------	------	------	------	------	------
TRINITY_DN57836_c1_g1	3250	0	0.745	4.02	zinc finger protein CONSTANS-LIKE 9-like [Asparagus officinalis]	GO:0005634;GO:0008270	CC:nucleus;MF:zinc ion binding;	------	------	------	------	------	------	------	------	PF06203.11	CCT	CCT motif
TRINITY_DN57853_c2_g2	1717	3.4	0.325	0.58	lysophospholipid acyltransferase LPEAT2 [Phalaenopsis equestris]	GO:0008152;GO:0008152;GO:0016021;GO:0005509;GO:0016746;GO:0005509;GO:0016746	BP:metabolic process;BP:metabolic process;CC:integral component of membrane;MF:calcium ion binding;MF:transferase activity, transferring acyl groups;MF:calcium ion binding;MF:transferase activity, transferring acyl groups;	------	------	------	------	------	------	gi|75160515|sp|Q8S8S2.1|LPCT2_ARATH;	RecName: Full=Lysophospholipid acyltransferase LPEAT2; AltName: Full=Lysophosphatidylethanolamine acyltransferase 2; Short=AtLPEAT2;	------	------	------
TRINITY_DN57863_c1_g3	1280	9.8	0.55	4.325	uncharacterized protein LOC109820403 [Asparagus officinalis]	GO:0016021;GO:0016021	CC:integral component of membrane;CC:integral component of membrane;	------	------	------	------	------	------	------	------	PF06749.9	DUF1218	Protein of unknown function
TRINITY_DN57918_c2_g1	1930	23.435	4.725	5.945	PREDICTED: SNAP25 homologous protein SNAP33 [Elaeis guineensis]	------	------	K18211	SNAP25	------	------	------	------	gi|27805727|sp|Q9S7P9.1|SNP33_ARATH;	RecName: Full=SNAP25 homologous protein SNAP33; Short=AtSNAP33; AltName: Full=Snap25a; AltName: Full=Synaptosomal-associated protein SNAP25-like 1; Short=SNAP-25-like protein 1;	------	------	------
TRINITY_DN57922_c2_g1	1149	9.745	0.425	21.33	PREDICTED: cytochrome P450 704C1 [Elaeis guineensis]	------	------	------	------	------	------	------	------	gi|75319885|sp|Q50EK3.1|C04C1_PINTA;	RecName: Full=Cytochrome P450 704C1; AltName: Full=Cytochrome P450 CYPD [Pinus taeda];	PF00067.19	p450	Cytochrome P450
TRINITY_DN57935_c1_g1	1251	1	24.575	7.9	uncharacterized protein LOC109820408 [Asparagus officinalis]	GO:0016021;GO:0009507	CC:integral component of membrane;CC:chloroplast;	------	------	------	------	------	------	gi|226735561|sp|B5YAR4.1|DNAJ_DICT6;	RecName: Full=Chaperone protein DnaJ;	PF00226.28;PF13370.3;PF13459.3	DnaJ;Fer4_13;Fer4_15	DnaJ domain;4Fe-4S single cluster domain of Ferredoxin I;4Fe-4S single cluster domain
TRINITY_DN57935_c1_g2	1708	0.415	13.78	67.925	uncharacterized protein LOC109820408 [Asparagus officinalis]	GO:0016021	CC:integral component of membrane;	------	------	------	------	------	------	gi|226735561|sp|B5YAR4.1|DNAJ_DICT6;	RecName: Full=Chaperone protein DnaJ;	PF00226.28;PF13370.3;PF13459.3	DnaJ;Fer4_13;Fer4_15	DnaJ domain;4Fe-4S single cluster domain of Ferredoxin I;4Fe-4S single cluster domain
TRINITY_DN57940_c0_g2	1787	231.02	21.14	17.31	gamma-glutamylcyclotransferase 2-1 [Prunus avium]	GO:0006751;GO:0003839	BP:glutathione catabolic process;MF:gamma-glutamylcyclotransferase activity;	------	------	------	------	COG3703	P:Inorganic ion transport and metabolism	gi|75151363|sp|Q8GY54.1|GCT21_ARATH;	RecName: Full=Gamma-glutamylcyclotransferase 2-1; Short=AtGGCT2;1; AltName: Full=Gamma-glutamyl cyclotransferase 2;1;	PF04752.9	ChaC	ChaC-like protein
TRINITY_DN57946_c6_g1	2477	9.22	1.475	1.21		------	------	------	------	------	------	------	------	------	------	------	------	------
TRINITY_DN57951_c1_g4	1222	26.045	4.53	6.08	PREDICTED: LEAF RUST 10 DISEASE-RESISTANCE LOCUS RECEPTOR-LIKE PROTEIN KINASE-like 1.2 isoform X10 [Phoenix dactylifera]	GO:0016021;GO:0016021;GO:0016021;GO:0016021;GO:0016021;GO:0005524;GO:0030247;GO:0004672;GO:0005524;GO:0030247;GO:0004672;GO:0005524;GO:0030247;GO:0004672;GO:0005524;GO:0030247;GO:0004672;GO:0005524;GO:0030247;GO:0004672	CC:integral component of membrane;CC:integral component of membrane;CC:integral component of membrane;CC:integral component of membrane;CC:integral component of membrane;MF:ATP binding;MF:polysaccharide binding;MF:protein kinase activity;MF:ATP binding;MF:polysaccharide binding;MF:protein kinase activity;MF:ATP binding;MF:polysaccharide binding;MF:protein kinase activity;MF:ATP binding;MF:polysac…	K04733	IRAK4	------	------	------	------	gi|75333429|sp|Q9C6K9.1|LRL11_ARATH;	RecName: Full=LEAF RUST 10 DISEASE-RESISTANCE LOCUS RECEPTOR-LIKE PROTEIN KINASE-like 1.1; AltName: Full=Probable receptor-like serine/threonine-protein kinase LRK10L-1.1; Flags: Precursor;	PF00069.22;PF07714.14	Pkinase;Pkinase_Tyr	Protein kinase domain;Protein tyrosine kinase
TRINITY_DN57979_c0_g1	894	1.45	0	0.445	uncharacterized protein A4U43_C05F34940 [Asparagus officinalis]	GO:0016021;GO:0005886;GO:0005524;GO:0046872;GO:0008553	CC:integral component of membrane;CC:plasma membrane;MF:ATP binding;MF:metal ion binding;MF:hydrogen-exporting ATPase activity, phosphorylative mechanism;	K01535	PMA1, PMA2	map00190	Oxidative phosphorylation	------	------	gi|12230461|sp|Q9M2A0.1|PMA8_ARATH;	RecName: Full=ATPase 8, plasma membrane-type; AltName: Full=Proton pump 8;	PF00122.17	E1-E2_ATPase	E1-E2 ATPase
TRINITY_DN57991_c6_g1	874	0.45	8.785	5.61		------	------	------	------	------	------	------	------	------	------	------	------	------
TRINITY_DN58024_c5_g2	1137	0.375	4.09	1.555		------	------	------	------	------	------	------	------	------	------	------	------	------
TRINITY_DN58048_c2_g1	2886	34.545	0.22	0.63	protein of unknown function DUF4283 [Macleaya cordata]	------	------	------	------	------	------	------	------	------	------	------	------	------
TRINITY_DN58048_c2_g2	1422	1.24	0.035	0.02		------	------	------	------	------	------	------	------	------	------	------	------	------
TRINITY_DN58052_c1_g1	1761	0	2.435	0.315		------	------	------	------	------	------	------	------	------	------	------	------	------
TRINITY_DN58069_c11_g2	1207	1.89	0.02	0.155	uncharacterized protein LOC112088922 [Eutrema salsugineum]	------	------	------	------	------	------	------	------	------	------	------	------	------
TRINITY_DN58093_c0_g5	1627	130.17	29.065	32.905	phosphatidylinositol 4-kinase gamma 4-like [Asparagus officinalis]	GO:0016301;GO:0016301;GO:0016301	MF:kinase activity;MF:kinase activity;MF:kinase activity;	------	------	------	------	------	------	gi|75216127|sp|Q9ZPY9.1|P4KG4_ARATH;	RecName: Full=Phosphatidylinositol 4-kinase gamma 4; Short=AtPI4Kgamma4; Short=PI-4Kgamma4; Short=PI4K gamma 4; AltName: Full=Ubiquitin-like domain kinase gamma 4; Short=UbDK gamma 4;	PF00454.24;PF00240.20;PF11976.5	PI3_PI4_kinase;ubiquitin;Rad60-SLD	Phosphatidylinositol 3- and 4-kinase;Ubiquitin family;Ubiquitin-2 like Rad60 SUMO-like
TRINITY_DN58104_c2_g3	752	15.47	2.105	7.15	5'-adenylylsulfate reductase [Polygonatum pubescens]	GO:0045454;GO:0019419;GO:0045454;GO:0019419;GO:0045454;GO:0019419;GO:0005623;GO:0005623;GO:0005623;GO:0033741;GO:0033741;GO:0016671	BP:cell redox homeostasis;BP:sulfate reduction;BP:cell redox homeostasis;BP:sulfate reduction;BP:cell redox homeostasis;BP:sulfate reduction;CC:cell;CC:cell;CC:cell;MF:adenylyl-sulfate reductas;MF:adenylyl-sulfate reductas;MF:oxidoreductase activity, acting on a sulfur group of donors, disulfide as acceptor;	K05907	APR	map00920	Sulfur metabolism	COG0175	P:Inorganic ion transport and metabolism	gi|75133644|sp|Q6Z4A7.1|APR1_ORYSJ;	RecName: Full=Probable 5'-adenylylsulfate reductase 1, chloroplastic; AltName: Full=Adenosine 5'-phosphosulfate 5'-adenylylsulfate sulfotransferase 1; Short=APS sulfotransferase 1; AltName: Full=Adenosine 5'-phosphosulfate reductase-like 1; Short=APR-like1; Short=OsAPRL1; AltName: Full=Thioredoxin-independent APS reductase 1; Flags: Precursor;	PF01507.16	PAPS_reduct	Phosphoadenosine phosphosulfate reductase family
TRINITY_DN58115_c0_g1	779	0	1.745	1.225	chloroplastic copper/zinc superoxide dismutase, partial [Plantago ovata]	GO:0005737;GO:0005615;GO:0046872;GO:0004784;GO:0046872;GO:0004784;GO:0046872;GO:0004784;GO:0005507;GO:0004784;GO:0008270;GO:0046872;GO:0004784	CC:cytoplasm;CC:extracellular space;MF:metal ion binding;MF:superoxide dismutase activity;MF:metal ion binding;MF:superoxide dismutase activity;MF:metal ion binding;MF:superoxide dismutase activity;MF:copper ion binding;MF:superoxide dismutase activity;MF:zinc ion binding;MF:metal ion binding;MF:superoxide dismutase activity;	K04565	SOD1	map04146	Peroxisome	------	------	gi|3915008|sp|P93407.1|SODCP_ORYSJ;	RecName: Full=Superoxide dismutase [Cu-Zn], chloroplastic; Flags: Precursor;	------	------	------
TRINITY_DN58128_c4_g1	720	4.07	59	17.325	PREDICTED: uncharacterized protein LOC103975318 [Musa acuminata subsp. malaccensis]	------	------	------	------	------	------	------	------	------	------	PF00903.22;PF13669.3	Glyoxalase;Glyoxalase_4	Glyoxalase/Bleomycin resistance protein/Dioxygenase superfamily;Glyoxalase/Bleomycin resistance protein/Dioxygenase superfamily
TRINITY_DN58128_c5_g1	1502	12.655	1.72	7.64		------	------	------	------	------	------	------	------	------	------	------	------	------
TRINITY_DN58148_c0_g2	1919	44.76	9.275	6.63	PREDICTED: receptor-like protein kinase FERONIA [Phoenix dactylifera]	GO:0016021;GO:0016021;GO:0005524;GO:0004672;GO:0005524;GO:0004672	CC:integral component of membrane;CC:integral component of membrane;MF:ATP binding;MF:protein kinase activity;MF:ATP binding;MF:protein kinase activity;	------	------	------	------	------	------	gi|75337066|sp|Q9SCZ4.1|FERON_ARATH;	RecName: Full=Receptor-like protein kinase FERONIA; AltName: Full=Protein SIRENE; Flags: Precursor;	PF12819.4;PF11721.5	Malectin_like;Malectin	Carbohydrate-binding protein of the ER;Di-glucose binding within endoplasmic reticulum
TRINITY_DN58151_c4_g1	718	0.945	60.17	4.45	non-specific lipid-transfer protein A-like [Asparagus officinalis]	GO:0006869;GO:0008289	BP:lipid transport;MF:lipid binding;	------	------	------	------	------	------	gi|3287877|sp|P81402.1|NLTP1_PRUPE;	RecName: Full=Non-specific lipid-transfer protein 1; Short=LTP 1; AltName: Full=Allergen Pru p 1; AltName: Full=Major allergen Pru p 3; AltName: Allergen=Pru p 3;	PF00234.19;PF14368.3	Tryp_alpha_amyl;LTP_2	Protease inhibitor/seed storage/LTP family;Probable lipid transfer
TRINITY_DN58152_c4_g4	705	0.26	5.185	2.8		------	------	------	------	------	------	------	------	------	------	------	------	------
TRINITY_DN58154_c1_g1	315	1.03	102.455	28.5		------	------	------	------	------	------	------	------	------	------	------	------	------
TRINITY_DN58213_c6_g1	1246	27.085	5.015	4.59	unnamed protein product [Coffea canephora]	GO:0006351;GO:0006351;GO:0005634;GO:0005634;GO:0003700;GO:0043565;GO:0003700;GO:0043565	BP:transcription, DNA-templated;BP:transcription, DNA-templated;CC:nucleus;CC:nucleus;MF:transcription factor activity, sequence-specific DNA binding;MF:sequence-specific DNA binding;MF:transcription factor activity, sequence-specific DNA binding;MF:sequence-specific DNA binding;	------	------	------	------	------	------	gi|29839626|sp|Q9FL62.1|WRK30_ARATH;	RecName: Full=Probable WRKY transcription factor 30; AltName: Full=WRKY DNA-binding protein 30;	PF03106.12	WRKY	WRKY DNA -binding domain
TRINITY_DN58219_c3_g1	508	229.655	5.805	39.77		------	------	------	------	------	------	------	------	------	------	------	------	------
TRINITY_DN58225_c1_g1	553	4.12	27.5	15.18	myb-related protein Zm38-like [Dendrobium catenatum]	GO:0003677;GO:0003677;GO:0003677	MF:DNA binding;MF:DNA binding;MF:DNA binding;	K09422	MYBP	------	------	------	------	gi|75107028|sp|P81393.1|MYB08_ANTMA;	RecName: Full=Myb-related protein 308;	PF00249.28;PF13921.3	Myb_DNA-binding;Myb_DNA-bind_6	Myb-like DNA-binding domain;Myb-like DNA-binding domain
TRINITY_DN58229_c3_g1	936	0.075	3.665	0.245		------	------	------	------	------	------	------	------	------	------	------	------	------
TRINITY_DN58264_c0_g2	482	7007.69	965.52	2210.45	PREDICTED: chitinase 2-like [Phoenix dactylifera]	GO:0005975;GO:0005975;GO:0016021;GO:0004553;GO:0004553	BP:carbohydrate metabolic process;BP:carbohydrate metabolic process;CC:integral component of membrane;MF:hydrolase activity, hydrolyzing O-glycosyl compounds;MF:hydrolase activity, hydrolyzing O-glycosyl compounds;	------	------	------	------	------	------	gi|47605559|sp|Q9SLP4.1|CHIT1_TULBA;	RecName: Full=Chitinase 1; AltName: Full=Tulip bulb chitinase-1; Short=TBC-1; Flags: Precursor;	------	------	------
TRINITY_DN58291_c3_g6	680	0	8.095	4.475		------	------	------	------	------	------	------	------	------	------	------	------	------
TRINITY_DN58309_c1_g2	651	3.4	0	0.23		------	------	------	------	------	------	------	------	------	------	------	------	------
TRINITY_DN58309_c7_g2	742	0	3.125	1.63		------	------	------	------	------	------	------	------	------	------	------	------	------
TRINITY_DN58316_c2_g7	1707	1.765	0.1	0.26	Reverse transcriptase zinc-binding domain [Macleaya cordata]	GO:0003676;GO:0003964;GO:0003676;GO:0003964;GO:0003676;GO:0003964;GO:0003676;GO:0003964	MF:nucleic acid binding;MF:RNA-directed DNA polymerase activity;MF:nucleic acid binding;MF:RNA-directed DNA polymerase activity;MF:nucleic acid binding;MF:RNA-directed DNA polymerase activity;MF:nucleic acid binding;MF:RNA-directed DNA polymerase activity;	------	------	------	------	------	------	------	------	------	------	------
TRINITY_DN58343_c1_g2	1725	3.325	0.08	0.485		------	------	------	------	------	------	------	------	------	------	------	------	------
TRINITY_DN58349_c3_g5	830	15.795	1.285	7.105	Thioredoxin-independent 5'-adenylylsulfate reductase [Trema orientalis]	GO:0045454;GO:0019419;GO:0005623;GO:0033741	BP:cell redox homeostasis;BP:sulfate reduction;CC:cell;MF:adenylyl-sulfate reductas;	K05907	APR	map00920	Sulfur metabolism	------	------	gi|24211447|sp|P92981.2|APR2_ARATH;	RecName: Full=5'-adenylylsulfate reductase 2, chloroplastic; AltName: Full=3'-phosphoadenosine-5'-phosphosulfate reductase homolog 43; Short=PAPS reductase homolog 43; Short=Prh-43; AltName: Full=Adenosine 5'-phosphosulfate 5'-adenylylsulfate sulfotransferase 2; Short=APS sulfotransferase 2; AltName: Full=Thioredoxin-independent APS reductase 2; Flags: Precursor;	PF00085.17;PF13098.3;PF00578.18;PF13899.3	Thioredoxin;Thioredoxin_2;AhpC-TSA;Thioredoxin_7	Thioredoxin;Thioredoxin-like domain;AhpC/TSA family;Thioredoxin-like
TRINITY_DN58353_c1_g2	1322	0.51	4.185	2	uncharacterized protein LOC109824247 [Asparagus officinalis]	GO:0071949;GO:0071949;GO:0071949	MF:FAD binding;MF:FAD binding;MF:FAD binding;	------	------	------	------	------	------	gi|1018737360|sp|A1TFU9.1|HPXO_MYCVP;	RecName: Full=FAD-dependent urate hydroxylase; AltName: Full=Flavoprotein urate hydroxylase;	PF01494.16;PF01266.21;PF07992.11;PF13450.3;PF00070.24;PF05834.9;PF13738.3;PF00890.21	FAD_binding_3;DAO;Pyr_redox_2;NAD_binding_8;Pyr_redox;Lycopene_cycl;Pyr_redox_3;FAD_binding_2	FAD binding domain;FAD dependent oxidoreductase;Pyridine nucleotide-disulphide oxidoreductase;NA;Pyridine nucleotide-disulphide oxidoreductase;Lycopene cyclase protein;Pyridine nucleotide-disulphide oxidoreductase;FAD binding domain
TRINITY_DN58440_c1_g2	5312	2.45	7.065	10.145	PREDICTED: ABC transporter G family member 39-like [Elaeis guineensis]	GO:0016021;GO:0016021;GO:0016021;GO:0005524;GO:0016887;GO:0005524;GO:0016887;GO:0005524;GO:0016887	CC:integral component of membrane;CC:integral component of membrane;CC:integral component of membrane;MF:ATP binding;MF:ATPase activity;MF:ATP binding;MF:ATPase activity;MF:ATP binding;MF:ATPase activity;	------	------	------	------	COG0842	V:Defense mechanisms	gi|75328828|sp|Q8GU88.1|AB39G_ORYSJ;	RecName: Full=ABC transporter G family member 39; Short=OsABCG39; AltName: Full=Pleiotropic drug resistance protein 7; Short=OsPDR7;	PF01061.21;PF00005.24;PF08370.8;PF13191.3;PF13481.3;PF13245.3	ABC2_membrane;ABC_tran;PDR_assoc;AAA_16;AAA_25;AAA_19	ABC-2 type transporter;ABC transporter;Plant PDR ABC transporter associated;AAA ATPase domain;AAA domain;Part of AAA domain
TRINITY_DN58448_c2_g7	999	1.425	12.015	9.785	cytochrome c heme attachment protein, partia	GO:0017004;GO:0017004;GO:0017004;GO:0017004;GO:0017004;GO:0016021;GO:0009536;GO:0016021;GO:0009536;GO:0042651;GO:0009535;GO:0016021;GO:0009535;GO:0016021;GO:0016021;GO:0009536;GO:0020037;GO:0020037;GO:0020037;GO:0020037;GO:0020037	BP:cytochrome complex assembly;BP:cytochrome complex assembly;BP:cytochrome complex assembly;BP:cytochrome complex assembly;BP:cytochrome complex assembly;CC:integral component of membrane;CC:plastid;CC:integral component of membrane;CC:plastid;CC:thylakoid membrane;CC:chloroplast thylakoid membrane;CC:integral component of membrane;CC:chloroplast thylakoid membrane;CC:integral component of membr…	------	------	------	------	------	------	gi|122230327|sp|Q0ZIW9.1|CCSA_VITVI;	RecName: Full=Cytochrome c biogenesis protein CcsA;	------	------	------
TRINITY_DN58457_c4_g1	970	14.065	0.545	12.865	protein LAZ1 homolog 1 [Asparagus officinalis]	GO:0016021;GO:0016021;GO:0016021	CC:integral component of membrane;CC:integral component of membrane;CC:integral component of membrane;	------	------	------	------	------	------	gi|75165213|sp|Q94CA0.1|LAZH1_ARATH;	RecName: Full=Protein LAZ1 homolog 1; AltName: Full=Lazarus1 homolog 1; Flags: Precursor;	PF03619.13	Solute_trans_a	Organic solute transporter Ostalpha
TRINITY_DN58471_c3_g1	4134	2.395	0.07	0.04	hypothetical protein GOBAR_DD06575 [Gossypium barbadense]	GO:0015074;GO:0015074;GO:0000105;GO:0005737;GO:0003676;GO:0004523;GO:0008270;GO:0043531;GO:0003676;GO:0008270;GO:0003879	BP:DNA integration;BP:DNA integration;BP:histidine biosynthetic process;CC:cytoplasm;MF:nucleic acid binding;MF:RNA-DNA hybrid ribonuclease activity;MF:zinc ion binding;MF:ADP binding;MF:nucleic acid binding;MF:zinc ion binding;MF:ATP phosphoribosyltransferase activity;	------	------	------	------	------	------	gi|130582|sp|P10978.1|POLX_TOBAC;	RecName: Full=Retrovirus-related Pol polyprotein from transposon TNT 1-94; Includes: RecName: Full=Protease; Includes: RecName: Full=Reverse transcriptase; Includes: RecName: Full=Endonuclease;	------	------	------
TRINITY_DN58474_c4_g4	1031	2.575	0.05	0.38		------	------	------	------	------	------	------	------	------	------	------	------	------
TRINITY_DN58483_c5_g2	1869	5.96	0.39	4.365	PREDICTED: WAT1-related protein At3g30340-like [Elaeis guineensis]	GO:0016021;GO:0016021;GO:0022857;GO:0022857	CC:integral component of membrane;CC:integral component of membrane;MF:transmembrane transporter activity;MF:transmembrane transporter activity;	------	------	------	------	------	------	gi|75273312|sp|Q9LI65.1|WTR24_ARATH;	RecName: Full=WAT1-related protein At3g30340;	PF00892.17	EamA	EamA-like transporter family
TRINITY_DN58495_c1_g2	1562	2.075	0.06	2.43	uncharacterized protein LOC111894346 [Lactuca sativa]	GO:0016579;GO:0016579;GO:0003676;GO:0036459;GO:0003676;GO:0036459	BP:protein deubiquitination;BP:protein deubiquitination;MF:nucleic acid binding;MF:thiol-dependent ubiquitinyl hydrolase activity;MF:nucleic acid binding;MF:thiol-dependent ubiquitinyl hydrolase activity;	------	------	------	------	------	------	------	------	PF04780.9	DUF629	Protein of unknown function
TRINITY_DN58512_c4_g1	1933	4.675	0.125	0.405		------	------	------	------	------	------	------	------	------	------	------	------	------
TRINITY_DN58524_c2_g3	1959	2.25	0.365	0.095		------	------	------	------	------	------	------	------	------	------	------	------	------
TRINITY_DN58554_c3_g1	853	21.855	122.38	182.66	uncharacterized protein LOC109718247 [Ananas comosus]	------	------	------	------	------	------	------	------	------	------	------	------	------
TRINITY_DN58586_c3_g1	2343	0.02	2.325	2.595		------	------	------	------	------	------	------	------	------	------	------	------	------
TRINITY_DN58595_c4_g1	1065	0.13	7.01	2.035	non-specific lipid-transfer protein 1-like [Asparagus officinalis]	GO:0006869;GO:0008289	BP:lipid transport;MF:lipid binding;	------	------	------	------	------	------	gi|2497740|sp|Q43304.1|NLTPD_BRAOT;	RecName: Full=Non-specific lipid-transfer protein D; Short=LTP D; AltName: Full=Wax-associated protein 9D; Flags: Precursor;	PF00234.19	Tryp_alpha_amyl	Protease inhibitor/seed storage/LTP family
TRINITY_DN58615_c1_g3	1832	0	1.97	4.985		------	------	------	------	------	------	------	------	------	------	------	------	------
TRINITY_DN58650_c1_g5	2477	1.33	9.16	5.84		------	------	------	------	------	------	------	------	------	------	------	------	------
TRINITY_DN58652_c5_g1	1027	3.98	0.46	0.605		------	------	------	------	------	------	------	------	------	------	------	------	------
TRINITY_DN58669_c0_g1	413	416.555	63.445	50.15	PREDICTED: ABC transporter G family member 39-like isoform X1 [Elaeis guineensis]	GO:0016021;GO:0016021;GO:0005886;GO:0005524;GO:0016887;GO:0005524;GO:0042626	CC:integral component of membrane;CC:integral component of membrane;CC:plasma membrane;MF:ATP binding;MF:ATPase activity;MF:ATP binding;MF:ATPase activity, coupled to transmembrane movement of substances;	------	------	------	------	------	------	gi|75328828|sp|Q8GU88.1|AB39G_ORYSJ;	RecName: Full=ABC transporter G family member 39; Short=OsABCG39; AltName: Full=Pleiotropic drug resistance protein 7; Short=OsPDR7;	------	------	------
TRINITY_DN58677_c2_g2	1183	21.74	3.02	3.13	PREDICTED: calmodulin-binding protein 60 E [Nelumbo nucifera]	GO:0006950;GO:0006950;GO:0006950;GO:0006950;GO:0016021;GO:0005516;GO:0005516;GO:0005516;GO:0005516	BP:response to stress;BP:response to stress;BP:response to stress;BP:response to stress;CC:integral component of membrane;MF:calmodulin binding;MF:calmodulin binding;MF:calmodulin binding;MF:calmodulin binding;	------	------	------	------	------	------	gi|825168338|sp|C0SV51.1|CB60C_ARATH;	RecName: Full=Calmodulin-binding protein 60 C;	PF07887.8	Calmodulin_bind	Calmodulin binding protein-like
TRINITY_DN58680_c1_g2	597	162.025	5.03	12.57	hypothetical protein CDL12_15574 [Handroanthus impetiginosus]	------	------	------	------	------	------	------	------	------	------	------	------	------
TRINITY_DN58688_c5_g1	838	9.105	0.325	0.74		------	------	------	------	------	------	------	------	------	------	------	------	------
TRINITY_DN58703_c2_g1	1054	0	1.09	0.245		------	------	------	------	------	------	------	------	------	------	------	------	------
TRINITY_DN58710_c1_g3	1254	52.45	6.78	23.36	PREDICTED: calcium-transporting ATPase 1, plasma membrane-type [Phoenix dactylifera]	GO:0016021;GO:0016021;GO:0016021;GO:0005524;GO:0005388;GO:0005516;GO:0005524;GO:0005388;GO:0005516;GO:0005524;GO:0005388;GO:0005516	CC:integral component of membrane;CC:integral component of membrane;CC:integral component of membrane;MF:ATP binding;MF:calcium-transporting ATPase activity;MF:calmodulin binding;MF:ATP binding;MF:calcium-transporting ATPase activity;MF:calmodulin binding;MF:ATP binding;MF:calcium-transporting ATPase activity;MF:calmodulin binding;	K01537	E3.6.3.8	------	------	------	------	gi|30316378|sp|Q37145.3|ACA1_ARATH;	RecName: Full=Calcium-transporting ATPase 1, chloroplastic; AltName: Full=C;	PF00689.18	Cation_ATPase_C	Cation transporting ATPase, C-terminus
TRINITY_DN58713_c4_g2	1541	39.17	7.725	11.145	PREDICTED: NAC domain-containing protein 74 isoform X1 [Elaeis guineensis]	GO:0006355;GO:0006351;GO:0016021;GO:0005634;GO:0003677	BP:regulation of transcription, DNA-templated;BP:transcription, DNA-templated;CC:integral component of membrane;CC:nucleus;MF:DNA binding;	------	------	------	------	------	------	------	------	------	------	------
TRINITY_DN58723_c3_g3	1241	21.31	3.04	4.305	junctophilin-1-like [Ananas comosus]	GO:0016021	CC:integral component of membrane;	------	------	------	------	COG4642	S:Function unknown	gi|75218151|sp|Q56YP2.1|PI5K1_ARATH;	RecName: Full=Phosphatidylinositol 4-phosphate 5-kinase 1; Short=AtPIP5K1; AltName: Full=1-phosphatidylinositol 4-phosphate kinase 1; AltName: Full=Diphosphoinositide kinase 1; AltName: Full=PtdIn;	PF02493.17	MORN	MORN repeat
TRINITY_DN58747_c0_g2	1359	0.045	2.725	2.885	LOW QUALITY PROTEIN: peroxisome biogenesis protein 5 [Asparagus officinalis]	------	------	K13342	PEX5, PXR1	map04146	Peroxisome	------	------	gi|75334058|sp|Q9FMA3.1|PEX5_ARATH;	RecName: Full=Peroxisome biogenesis protein 5; AltName: Full=Peroxin-5; Short=AtPEX5; AltName: Full=Peroxisomal targeting signal type 1 receptor; AltName: Full=Pex5p;	------	------	------
TRINITY_DN58757_c0_g1	728	33.9	1.415	4.05	PREDICTED: pollen-specific leucine-rich repeat extensin-like protein 3 [Phoenix dactylifera]	------	------	------	------	------	------	------	------	------	------	PF05678.11	VQ	VQ motif
TRINITY_DN58770_c0_g1	1266	3.46	0.445	1.015		------	------	------	------	------	------	------	------	------	------	------	------	------
TRINITY_DN58796_c3_g1	2257	0.9	6.395	7.155	PREDICTED: AAA-ATPase At3g50940-like [Phoenix dactylifera]	GO:0005524;GO:0005524;GO:0005524	MF:ATP binding;MF:ATP binding;MF:ATP binding;	------	------	------	------	------	------	gi|122243362|sp|Q147F9.1|AATPC_ARATH;	RecName: Full=AAA-ATPase At3g50940; Flags: Precursor;	PF00004.26;PF14363.3;PF13191.3;PF13401.3;PF13086.3;PF13245.3;PF07728.11;PF05496.9	AAA;AAA_assoc;AAA_16;AAA_22;AAA_11;AAA_19;AAA_5;RuvB_N	ATPase family associated with various cellular activities;Domain associated at C-terminal with AAA;AAA ATPase domain;AAA domain;AAA domain;Part of AAA domain;AAA domain;Holliday junction DNA helicase ruvB N-terminus
TRINITY_DN58796_c4_g2	1927	29.37	5.51	3.185	PREDICTED: protein HYPER-SENSITIVITY-RELATED 4 [Phoenix dactylifera]	GO:0005524;GO:0005524	MF:ATP binding;MF:ATP binding;	------	------	------	------	COG0465	O:Posttranslational modification, protein turnover, chaperones	gi|122243362|sp|Q147F9.1|AATPC_ARATH;	RecName: Full=AAA-ATPase At3g50940; Flags: Precursor;	PF00004.26;PF05673.10;PF13245.3;PF13191.3;PF07728.11;PF13555.3;PF14363.3	AAA;DUF815;AAA_19;AAA_16;AAA_5;AAA_29;AAA_assoc	ATPase family associated with various cellular activities;Protein of unknown function;Part of AAA domain;AAA ATPase domain;AAA domain;P-loop containing region of AAA domain;Domain associated at C-terminal with AAA
TRINITY_DN58799_c11_g1	1357	0	1.04	1.12		------	------	------	------	------	------	------	------	------	------	------	------	------
TRINITY_DN58815_c3_g3	2063	79.565	13.705	16.395	PREDICTED: reticuline oxidase-like [Musa acuminata subsp. malaccensis]	GO:0016021;GO:0050660;GO:0016614	CC:integral component of membrane;MF:flavin adenine dinucleotide binding;MF:oxidoreductase activity, acting on CH-OH group of donors;	------	------	------	------	------	------	gi|400972|sp|P30986.1|RETO_ESCCA;	RecName: Full=Reticuline oxidase; AltName: Full=Berberine bridge-forming enzyme; Short=BBE; AltName: Full=Tetrahydroprotoberberine synthase; Flags: Precursor;	PF01565.20;PF08031.9	FAD_binding_4;BBE	FAD binding domain;Berberine and berberine like
TRINITY_DN58837_c8_g1	2006	6.25	0.285	0.11		------	------	------	------	------	------	------	------	------	------	------	------	------
TRINITY_DN58840_c1_g1	1206	20.72	3.165	5.19	PREDICTED: ABC transporter B family member 20-like [Elaeis guineensis]	GO:0016021;GO:0016021;GO:0005524;GO:0042626;GO:0005524;GO:0042626	CC:integral component of membrane;CC:integral component of membrane;MF:ATP binding;MF:ATPase activity, coupled to transmembrane movement of substances;MF:ATP binding;MF:ATPase activity, coupled to transmembrane movement of substances;	K05658	ABCB1, CD243	map02010	ABC transporters	------	------	gi|75335876|sp|Q9M3B9.1|AB20B_ARATH;	RecName: Full=ABC transporter B family member 20; Short=ABC transporter ABCB.20; Short=AtABCB20; AltName: Full=Multidrug resistance protein 14; AltName: Full=P-glycoprotein 20;	PF00664.20;PF00005.24;PF13555.3	ABC_membrane;ABC_tran;AAA_29	ABC transporter transmembrane region;ABC transporter;P-loop containing region of AAA domain
TRINITY_DN58847_c2_g1	637	85.755	12.675	15.91	PREDICTED: probable serine/threonine-protein kinase PIX13 [Elaeis guineensis]	GO:0005524;GO:0004674	MF:ATP binding;MF:protein serine/threonine kinase activity;	------	------	------	------	------	------	gi|21431784|sp|P43293.2|NAK_ARATH;	RecName: Full=Probable serine/threonine-protein kinase NAK;	------	------	------
TRINITY_DN58853_c6_g1	1430	5.955	2.54	6.11		------	------	------	------	------	------	------	------	------	------	------	------	------
TRINITY_DN58872_c4_g2	821	76.33	10.365	33.98	uncharacterized protein LOC109708813 [Ananas comosus]	GO:0016021;GO:0005737;GO:0016021;GO:0005737;GO:0016021	CC:integral component of membrane;CC:cytoplasm;CC:integral component of membrane;CC:cytoplasm;CC:integral component of membrane;	K13348	MPV17	map04146	Peroxisome	------	------	------	------	------	------	------
TRINITY_DN58890_c6_g1	314	0	17.46	4.635		------	------	------	------	------	------	------	------	------	------	------	------	------
TRINITY_DN58931_c2_g2	1189	33.29	229.515	19.015	PREDICTED: GDSL esterase/lipase At3g26430-like [Phoenix dactylifera]	GO:0008152;GO:0016788;GO:0004560;GO:0016788	BP:metabolic process;MF:hydrolase activity, acting on ester bonds;MF:alpha-L-fucosidase activity;MF:hydrolase activity, acting on ester bonds;	------	------	------	------	------	------	gi|75273423|sp|Q9LIN2.1|GDL53_ARATH;	RecName: Full=GDSL esterase/lipase At3g26430; AltName: Full=Extracellular lipase At3g26430; Flags: Precursor;	PF00657.19	Lipase_GDSL	GDSL-like Lipase/Acylhydrolase
TRINITY_DN58953_c0_g1	2454	57.37	15.635	17.61	PREDICTED: UV-B-induced protein At3g17800, chloroplastic-like [Phoenix dactylifera]	------	------	------	------	------	------	------	------	gi|75274373|sp|Q9LVJ0.1|UVB31_ARATH;	RecName: Full=UV-B-induced protein At3g17800, chloroplastic; Flags: Precursor;	PF05542.8	DUF760	Protein of unknown function
TRINITY_DN58956_c1_g2	469	9.64	848.59	769.44	ribulose bisphosphate carboxylase small chain, chloroplastic-like [Asparagus officinalis]	GO:0015977;GO:0009853;GO:0015979;GO:0015977;GO:0009853;GO:0015979;GO:0009507;GO:0009507;GO:0004497;GO:0016984;GO:0004497;GO:0016984	BP:carbon fixation;BP:photorespiration;BP:photosynthesis;BP:carbon fixation;BP:photorespiration;BP:photosynthesis;CC:chloroplast;CC:chloroplast;MF:monooxygenase activity;MF:ribulose-bisphosphate carboxylase activity;MF:monooxygenase activity;MF:ribulose-bisphosphate carboxylase activity;	K01602	rbcS	map00630;map00710	Glyoxylate and dicarboxylate metabolism;Carbon fixation in photosynthetic organisms	COG4451	C:Energy production and conversion	gi|3914574|sp|O22572.1|RBS2_FRIAG;	RecName: Full=Ribulose bisphosphate carboxylase small chain 2, chloroplastic; Short=RuBisCO small subunit 2; Flags: Precursor;	PF00101.17;PF12338.5	RuBisCO_small;RbcS	Ribulose bisphosphate carboxylase, small chain;Ribulose-1,5-bisphosphate carboxylase small subunit
TRINITY_DN58987_c4_g1	3567	1.155	5.08	4.995	PREDICTED: uncharacterized protein LOC103713325 [Phoenix dactylifera]	GO:0005886	CC:plasma membrane;	------	------	------	------	------	------	gi|75116324|sp|Q67W65.1|TAF1_ORYSJ;	RecName: Full=Transcription initiation factor TFIID subunit 1; AltName: Full=TAFII250;	------	------	------
TRINITY_DN58992_c3_g1	629	99.795	8.915	37.05		------	------	------	------	------	------	------	------	------	------	------	------	------
TRINITY_DN59018_c2_g1	511	0.525	18.34	2.125		------	------	------	------	------	------	------	------	------	------	PF07869.9	DUF1656	Protein of unknown function
TRINITY_DN59054_c0_g1	3156	10.06	1.01	1.93	uncharacterized protein LOC109823734 [Asparagus officinalis]	------	------	------	------	------	------	------	------	gi|45477041|sp|P92519.1|M810_ARATH;	RecName: Full=Uncharacterized mitochondrial protein AtMg00810; AltName: Full=ORF240b;	------	------	------
TRINITY_DN59072_c0_g3	744	1.205	24.135	35.735	polygalacturonase inhibitor-like [Asparagus officinalis]	------	------	------	------	------	------	------	------	gi|464367|sp|Q05091.1|PGIP_PYRCO;	RecName: Full=Polygalacturonase inhibitor; AltName: Full=Polygalacturonase-inhibiting protein; Short=PGIG; Flags: Precursor;	PF13855.3;PF12799.4	LRR_8;LRR_4	Leucine rich repeat;Leucine Rich repeats
TRINITY_DN59077_c2_g2	1796	15.42	2.36	18.94	sugar transporter ERD6-like 5 [Asparagus officinalis]	GO:0008643;GO:0016021;GO:0016021;GO:0022857;GO:0022857	BP:carbohydrate transport;CC:integral component of membrane;CC:integral component of membrane;MF:transmembrane transporter activity;MF:transmembrane transporter activity;	K08145	SLC2A8, GLUT8	------	------	------	------	gi|117940159|sp|P93051.2|ERDL7_ARATH;	RecName: Full=Sugar transporter ERD6-like 7;	PF00083.21;PF07690.13;PF13347.3	Sugar_tr;MFS_1;MFS_2	Sugar;Major Facilitator Superfamily;MFS/sugar transport protein
TRINITY_DN59089_c1_g2	710	39.3	9.3	13.125	PREDICTED: uncharacterized protein LOC105060131 [Elaeis guineensis]	------	------	------	------	------	------	------	------	------	------	------	------	------
TRINITY_DN59143_c0_g1	789	12.005	0.63	2.25	protein TIFY 10a-like [Dendrobium catenatum]	------	------	K13464	JAZ	map04075	Plant hormone signal transduction	------	------	gi|75147844|sp|Q84R94.1|TI10A_ORYSJ;	RecName: Full=Protein TIFY 10a; Short=OsTIFY10a; AltName: Full=Jasmonate ZIM domain-containing protein 6; Short=OsJAZ6; AltName: Full=OsJAZ5;	PF06200.11;PF09425.7	tify;CCT_2	tify domain;Divergent CCT motif
TRINITY_DN59156_c3_g4	494	37.175	135.34	48.875	GATA transcription factor 4-like [Phalaenopsis equestris]	GO:0003700;GO:0043565;GO:0008270;GO:0003700;GO:0043565;GO:0008270	MF:transcription factor activity, sequence-specific DNA binding;MF:sequence-specific DNA binding;MF:zinc ion binding;MF:transcription factor activity, sequence-specific DNA binding;MF:sequence-specific DNA binding;MF:zinc ion binding;	------	------	------	------	------	------	gi|71660752|sp|Q9SV30.1|GATA8_ARATH;	RecName: Full=GATA transcription factor 8;	PF00320.24	GATA	GATA zinc finger
TRINITY_DN59185_c0_g1	1701	4.87	88.18	16.89	putative glucan endo-1,3-beta-glucosidase GVI [Asparagus officinalis]	GO:0005975;GO:0004553	BP:carbohydrate metabolic process;MF:hydrolase activity, hydrolyzing O-glycosyl compounds;	------	------	------	------	------	------	gi|585078|sp|Q02439.1|E13F_HORVU;	RecName: Full=Putative glucan endo-1,3-beta-glucosidase GVI; AltName: Full;	PF00332.15	Glyco_hydro_17	Glycosyl hydrolases family 17
TRINITY_DN59185_c0_g4	1372	0.87	11.63	7.475	putative glucan endo-1,3-beta-glucosidase GVI [Asparagus officinalis]	GO:0005975;GO:0004553	BP:carbohydrate metabolic process;MF:hydrolase activity, hydrolyzing O-glycosyl compounds;	------	------	------	------	------	------	gi|585078|sp|Q02439.1|E13F_HORVU;	RecName: Full=Putative glucan endo-1,3-beta-glucosidase GVI; AltName: Full;	PF00332.15	Glyco_hydro_17	Glycosyl hydrolases family 17
TRINITY_DN59250_c6_g1	2508	3.045	0.265	0.11		------	------	------	------	------	------	------	------	------	------	------	------	------
TRINITY_DN59275_c1_g2	795	20.615	3.605	5.525	probable serine/threonine-protein kinase PBL19 [Asparagus officinalis]	GO:0005524;GO:0004674;GO:0005524;GO:0004674	MF:ATP binding;MF:protein serine/threonine kinase activity;MF:ATP binding;MF:protein serine/threonine kinase activity;	------	------	------	------	------	------	gi|75335460|sp|Q9LTC0.1|Y5707_ARATH;	RecName: Full=Probable receptor-like protein kinase At5g47070;	------	------	------
TRINITY_DN59292_c5_g1	795	1.465	7.455	6.7	uncharacterized protein LOC109851433 [Asparagus officinalis]	GO:0009642;GO:0009642	BP:response to light intensity;BP:response to light intensity;	------	------	------	------	------	------	------	------	------	------	------
TRINITY_DN59330_c0_g1	608	11.03	1.245	0.26	Ethylene-responsive transcription factor ERF112 [Dendrobium catenatum]	GO:0006351;GO:0006351;GO:0005634;GO:0005634;GO:0003677;GO:0003700;GO:0003677;GO:0003700	BP:transcription, DNA-templated;BP:transcription, DNA-templated;CC:nucleus;CC:nucleus;MF:DNA binding;MF:transcription factor activity, sequence-specific DNA binding;MF:DNA binding;MF:transcription factor activity, sequence-specific DNA binding;	------	------	------	------	------	------	gi|156633603|sp|Q7G1L2.2|RAP26_ARATH;	RecName: Full=Ethylene-responsive transcription factor RAP2-6; AltName: Full=Protein RELATED TO APETALA2 6;	PF00847.17	AP2	AP2 domain
TRINITY_DN59337_c7_g1	1429	0.895	0	0.11		------	------	------	------	------	------	------	------	------	------	------	------	------
TRINITY_DN59341_c0_g1	827	6.75	0.3	0.31	PREDICTED: protein TIFY 5A-like [Elaeis guineensis]	------	------	------	------	------	------	------	------	gi|75155014|sp|Q8LBM2.1|TIF5A_ARATH;	RecName: Full=Protein TIFY 5A; AltName: Full=Jasmonate ZIM domain-containing protein 8;	PF06200.11;PF09425.7	tify;CCT_2	tify domain;Divergent CCT motif
TRINITY_DN59348_c1_g1	254	1.56	150.74	14.085		------	------	------	------	------	------	------	------	------	------	------	------	------
TRINITY_DN59354_c11_g1	836	0.04	36.335	0.42	PREDICTED: uncharacterized protein LOC105036433 [Elaeis guineensis]	------	------	------	------	------	------	------	------	------	------	------	------	------
TRINITY_DN59365_c4_g7	447	16.37	78.87	142.145	PREDICTED: ethylene-responsive transcription factor ERF053-like [Musa acuminata subsp. malaccensis]	GO:0006351;GO:0005634;GO:0003677;GO:0003700	BP:transcription, DNA-templated;CC:nucleus;MF:DNA binding;MF:transcription factor activity, sequence-specific DNA binding;	------	------	------	------	------	------	gi|75266005|sp|Q9SKT1.1|ERF53_ARATH;	RecName: Full=Ethylene-responsive transcription factor ERF053;	PF00847.17	AP2	AP2 domain
TRINITY_DN59380_c0_g4	533	33.06	0.325	1.68	PREDICTED: 7-deoxyloganetin glucosyltransferase-like [Elaeis guineensis]	GO:0008152;GO:0008152;GO:0008152;GO:0008152;GO:0016758;GO:0016758;GO:0016758;GO:0016758	BP:metabolic process;BP:metabolic process;BP:metabolic process;BP:metabolic process;MF:transferase activity, transferring hexosyl groups;MF:transferase activity, transferring hexosyl groups;MF:transferase activity, transferring hexosyl groups;MF:transferase activity, transferring hexosyl groups;	K21374	UGT85A	------	------	------	------	gi|678019175|sp|F8WLS6.1|UGT6_CATRO;	RecName: Full=7-deoxyloganetin glucosyltransferase; AltName: Full=Iridoid 1-O-glucosyltransferase; AltName: Full=UDP-glucose glucosyltransferase 6; Short=CrUGT6; AltName: Full=UDP-glycosyltransferase 85A23;	PF00201.15	UDPGT	UDP-glucoronosyl and UDP-glucosyl transferase
TRINITY_DN59380_c0_g6	610	0.215	13.965	51.62	uncharacterized protein A4U43_C03F18380 [Asparagus officinalis]	GO:0008152;GO:0008152;GO:0008152;GO:0016758;GO:0016758;GO:0016758	BP:metabolic process;BP:metabolic process;BP:metabolic process;MF:transferase activity, transferring hexosyl groups;MF:transferase activity, transferring hexosyl groups;MF:transferase activity, transferring hexosyl groups;	K21374	UGT85A	------	------	------	------	gi|75292644|sp|Q6VAB3.1|U85A8_STERE;	RecName: Full=UDP-glycosyltransferase 85A8;	PF00201.15	UDPGT	UDP-glucoronosyl and UDP-glucosyl transferase
TRINITY_DN59412_c6_g2	2072	0.86	9.475	13.155	PREDICTED: EID1-like F-box protein 3 [Elaeis guineensis]	------	------	------	------	------	------	------	------	gi|75163822|sp|Q93ZT5.1|EDL3_ARATH;	RecName: Full=EID1-like F-box protein 3;	PF12937.4;PF13408.3	F-box-like;Zn_ribbon_recom	F-box-like;Recombinase zinc beta ribbon domain
TRINITY_DN59477_c3_g1	816	59.975	17.225	28.985	PREDICTED: uncharacterized protein LOC105053222 [Elaeis guineensis]	GO:0016021	CC:integral component of membrane;	------	------	------	------	------	------	gi|332313332|sp|B6TZ45.1|CNR1_MAIZE;	RecName: Full=Cell number regulator 1; AltName: Full=ZmCNR01;	PF04749.14	PLAC8	PLAC8 family
TRINITY_DN59487_c1_g1	802	3.335	69.78	49.24	Recombination protein like [Actinidia chinensis var. chinensis]	------	------	------	------	------	------	------	------	------	------	------	------	------
TRINITY_DN59488_c3_g1	376	10.285	0	3.24	PREDICTED: zinc finger MYM-type protein 1-like [Camelina sativa]	------	------	------	------	------	------	------	------	------	------	------	------	------
TRINITY_DN59491_c2_g1	645	8.8	83.525	32.41		------	------	------	------	------	------	------	------	------	------	------	------	------
TRINITY_DN59505_c2_g1	828	5.175	0.415	0.195	PREDICTED: uncharacterized protein LOC103981588 [Musa acuminata subsp. malaccensis]	------	------	------	------	------	------	------	------	------	------	------	------	------
TRINITY_DN59509_c2_g1	660	11.745	0.27	1.56		------	------	------	------	------	------	------	------	------	------	PF04419.11	4F5	4F5 protein family
TRINITY_DN59519_c0_g4	523	8.435	0.255	6.09		------	------	------	------	------	------	------	------	------	------	------	------	------
TRINITY_DN59541_c0_g1	2532	5.02	0.575	2.89	PREDICTED: G-type lectin S-receptor-like serine/threonine-protein kinase At2g19130 [Phoenix dactylifera]	GO:0048544;GO:0048544;GO:0048544;GO:0016021;GO:0016021;GO:0016021;GO:0005524;GO:0030246;GO:0004674;GO:0005524;GO:0030246;GO:0004674;GO:0005524;GO:0030246;GO:0004674	BP:recognition of pollen;BP:recognition of pollen;BP:recognition of pollen;CC:integral component of membrane;CC:integral component of membrane;CC:integral component of membrane;MF:ATP binding;MF:carbohydrate binding;MF:protein serine/threonine kinase activity;MF:ATP binding;MF:carbohydrate binding;MF:protein serine/threonine kinase activity;MF:ATP binding;MF:carbohydrate binding;MF:protein serine…	------	------	------	------	------	------	gi|75099051|sp|O64477.1|Y2913_ARATH;	RecName: Full=G-type lectin S-receptor-like serine/threonine-protein kinase At2g19130; Flags: Precursor;	PF00069.22;PF07714.14;PF01453.21;PF00954.17;PF08276.8	Pkinase;Pkinase_Tyr;B_lectin;S_locus_glycop;PAN_2	Protein kinase domain;Protein tyrosine kinase;D-mannose binding lectin;S-locus glycoprotein domain;PAN-like domain
TRINITY_DN59556_c2_g1	1952	22.095	61.63	36.515	hypothetical protein KK1_042921 [Cajanus cajan]	------	------	------	------	------	------	------	------	gi|75163743|sp|Q93ZB1.1|LOL1_ARATH;	RecName: Full=Protein LOL1; AltName: Full=Protein LSD ONE LIKE 1; Short=AtLOL1; AltName: Full=Putative zinc finger LOL1;	------	------	------
TRINITY_DN59562_c0_g1	613	8.075	0	0.255		------	------	------	------	------	------	------	------	------	------	------	------	------
TRINITY_DN59562_c1_g1	3138	61.58	12.845	21.55	receptor-like protein kinase HSL1 [Asparagus officinalis]	GO:0016021;GO:0016021;GO:0016021;GO:0005524;GO:0004674;GO:0005524;GO:0004674;GO:0005524;GO:0004674	CC:integral component of membrane;CC:integral component of membrane;CC:integral component of membrane;MF:ATP binding;MF:protein serine/threonine kinase activity;MF:ATP binding;MF:protein serine/threonine kinase activity;MF:ATP binding;MF:protein serine/threonine kinase activity;	------	------	------	------	------	------	gi|75337207|sp|Q9SGP2.1|HSL1_ARATH;	RecName: Full=Receptor-like protein kinase HSL1; AltName: Full=Protein HAESA-LIKE1; Flags: Precursor;	PF00069.22;PF13855.3;PF07714.14;PF12799.4;PF08263.9	Pkinase;LRR_8;Pkinase_Tyr;LRR_4;LRRNT_2	Protein kinase domain;Leucine rich repeat;Protein tyrosine kinase;Leucine Rich repeats;Leucine rich repeat N-terminal domain
TRINITY_DN59576_c4_g4	1531	0.6	0	0		------	------	------	------	------	------	------	------	------	------	------	------	------
TRINITY_DN59589_c1_g4	694	0.105	3.18	0.455		------	------	------	------	------	------	------	------	------	------	------	------	------
TRINITY_DN59596_c1_g2	431	47.99	10.495	20.905	tetraspanin-3 [Asparagus officinalis]	GO:0016021;GO:0016021;GO:0016021	CC:integral component of membrane;CC:integral component of membrane;CC:integral component of membrane;	------	------	------	------	------	------	gi|75264554|sp|Q9M1E7.1|TET3_ARATH;	RecName: Full=Tetraspanin-3;	PF00335.17	Tetraspannin	Tetraspanin family
TRINITY_DN59622_c3_g1	1454	0.04	1.385	2.795	cyclin-dependent kinase B2-1-like [Ananas comosus]	GO:0005524;GO:0004674;GO:0005524;GO:0004674;GO:0005524;GO:0004672	MF:ATP binding;MF:protein serine/threonine kinase activity;MF:ATP binding;MF:protein serine/threonine kinase activity;MF:ATP binding;MF:protein kinase activity;	K07760	CDK	------	------	------	------	gi|152013425|sp|Q8LG64.2|CKB22_ARATH;	RecName: Full=Cyclin-dependent kinase B2-2; Short=CDKB2;2;	------	------	------
TRINITY_DN59644_c3_g1	779	72.785	3.495	11.18	PREDICTED: methylecgonone reductase-like [Nelumbo nucifera]	GO:0016491;GO:0016491;GO:0016491;GO:0016491	MF:oxidoreductase activity;MF:oxidoreductase activity;MF:oxidoreductase activity;MF:oxidoreductase activity;	------	------	------	------	------	------	gi|75266185|sp|Q9SQ64.1|COR2_PAPSO;	RecName: Full=Non-functional NADPH-dependent codeinone reductase 2;	PF00248.18	Aldo_ket_red	Aldo/keto reductase family
TRINITY_DN59644_c3_g2	770	54.08	2.155	4.98	PREDICTED: methylecgonone reductase-like [Vitis vinifera]	GO:0016491	MF:oxidoreductase activity;	------	------	------	------	------	------	gi|75266185|sp|Q9SQ64.1|COR2_PAPSO;	RecName: Full=Non-functional NADPH-dependent codeinone reductase 2;	PF00248.18	Aldo_ket_red	Aldo/keto reductase family
TRINITY_DN59651_c0_g1	342	37.685	0.295	0.88		------	------	------	------	------	------	------	------	------	------	------	------	------
TRINITY_DN59660_c1_g3	1334	4.255	0.095	1.265	multicopper oxidase LPR2-like [Asparagus officinalis]	GO:0005507;GO:0016491	MF:copper ion binding;MF:oxidoreductase activity;	------	------	------	------	------	------	gi|657340885|sp|F4I4K5.1|LPR1_ARATH;	RecName: Full=Multicopper oxidase LPR1; AltName: Full=Protein LOW PHOSPHATE ROOT 1; Flags: Precursor;	PF00394.19;PF07732.12	Cu-oxidase;Cu-oxidase_3	Multicopper oxidase;Multicopper oxidase
TRINITY_DN59687_c3_g5	1389	0	0.905	0.985	alcohol dehydrogenase 1 [Asparagus officinalis]	GO:0016491;GO:0008270	MF:oxidoreductase activity;MF:zinc ion binding;	K18857	ADH1	map00010;map00592;map00350;map00071	Glycolysis / Gluconeogenesis;alpha-Linolenic acid metabolism;Tyrosine metabolism;Fatty acid degradation	------	------	gi|113386|sp|P14675.1|ADH3_SOLTU;	RecName: Full=Alcohol dehydrogenase 3;	PF00107.23;PF08240.9;PF16912.2	ADH_zinc_N;ADH_N;Glu_dehyd_C	Zinc-binding dehydrogenase;Alcohol dehydrogenase GroES-like domain;Glucose dehydrogenase C-terminus
TRINITY_DN59712_c4_g4	1042	1.295	27.495	13.565	PREDICTED: elongation of fatty acids protein 3-like [Elaeis guineensis]	GO:0016021;GO:0016021	CC:integral component of membrane;CC:integral component of membrane;	------	------	------	------	------	------	gi|75213501|sp|Q9SYY4.1|ELO3L_ARATH;	RecName: Full=Elongation of fatty acids protein 3-like; Short=Protein ELO3-like; AltName: Full=Protein HIGH EXPRESSION OF OSMOTICALLY RESPONSIVE GENES 3; AltName: Full=Very long-chain fatty acid condensing enzyme HOS3; Short=VLCFA condensing enzyme HOS3;	PF01151.15	ELO	GNS1/SUR4 family
TRINITY_DN59713_c0_g3	734	25.66	3.04	3.75		------	------	------	------	------	------	------	------	------	------	------	------	------
TRINITY_DN59723_c2_g1	1833	139.885	9	7.775	uncharacterized protein A4U43_C08F9820 [Asparagus officinalis]	GO:0004385	MF:guanylate kinase activity;	K00942	E2.7.4.8, gmk	map00230	Purine metabolism	COG0194	F:Nucleotide transport and metabolism	gi|122248570|sp|Q2QPW1.2|GMK1_ORYSJ;	RecName: Full=Guanylate kinase 1; Short=OsGK1; AltName: Full=GMP kinase 1;	PF00625.18;PF13964.3;PF01344.22;PF07646.12;PF13418.3;PF13191.3	Guanylate_kin;Kelch_6;Kelch_1;Kelch_2;Kelch_4;AAA_16	Guanylate kinase;Kelch motif;Kelch motif;Kelch motif;Galactose oxidase, central domain;AAA ATPase domain
TRINITY_DN59728_c0_g1	755	63.89	8.99	34.225	receptor-like serine/threonine-protein kinase SD1-8 [Asparagus officinalis]	------	------	------	------	------	------	------	------	gi|75319440|sp|Q39086.1|SD17_ARATH;	RecName: Full=Receptor-like serine/threonine-protein kinase SD1-7; AltName: Full=Arabidopsis thaliana receptor kinase 1; AltName: Full=S-domain-1;	PF07714.14;PF00069.22	Pkinase_Tyr;Pkinase	Protein tyrosine kinase;Protein kinase domain
TRINITY_DN59733_c4_g1	5007	16.5	1.63	1.585	uncharacterized protein A4U43_C05F6990 [Asparagus officinalis]	GO:0020037;GO:0005506;GO:0016705;GO:0020037;GO:0005506;GO:0004497;GO:0016705	MF:heme binding;MF:iron ion binding;MF:oxidoreductase activity, acting on paired donors, with incorporation or reduction of molecular oxygen;MF:heme binding;MF:iron ion binding;MF:monooxygenase activity;MF:oxidoreductase activity, acting on paired donors, with incorporation or reduction of molecular oxygen;	------	------	------	------	------	------	gi|403399720|sp|B5BSX1.1|BAMO_GLYUR;	RecName: Full=Beta-amyrin 11-oxidase; AltName: Full=Cytochrome P450 88D6 [Glycyrrhiza uralensis];	PF00067.19	p450	Cytochrome P450
TRINITY_DN59755_c7_g1	1665	3.275	12.87	5.265		------	------	------	------	------	------	------	------	------	------	------	------	------
TRINITY_DN59786_c1_g1	476	2.635	38.655	0.765		------	------	------	------	------	------	------	------	------	------	------	------	------
TRINITY_DN59858_c1_g1	1325	40.015	4.07	9.675	LOW QUALITY PROTEIN: RNA polymerase sigma factor sigE, chloroplastic/mitochondrial-like [Asparagus officinalis]	GO:0006352;GO:0006352;GO:0071483;GO:0071472;GO:0009658;GO:0006352;GO:0009553;GO:0010207;GO:0045893;GO:0010218;GO:0010114;GO:0005739;GO:0003700;GO:0003700;GO:0003700;GO:0001053	BP:DNA-templated transcription, initiation;BP:DNA-templated transcription, initiation;BP:cellular response to blue light;BP:cellular response to salt stress;BP:chloroplast organization;BP:DNA-templated transcription, initiation;BP:embryo sac development;BP:photosystem II assembly;BP:positive regulation of transcription, DNA-templated;BP:response to far red light;BP:response to red light;CC:mitoch…	K03093	SIGMA70	------	------	COG0568	K:Transcription	gi|75267675|sp|Q9ZNX9.1|SIGE_ARATH;	RecName: Full=RNA polymerase sigma factor sigE, chloroplastic/mitochondrial; Short=Sigma factor E; Short=Sigma-E; AltName: Full=RNA polymerase sigma factor sig5; Short=Atsig5; Short=Sigma factor 5; Flags: Precursor;	PF04539.13;PF04545.13;PF04542.11	Sigma70_r3;Sigma70_r4;Sigma70_r2	Sigma-70 region 3;Sigma-70, region 4;Sigma-70 region 2
TRINITY_DN59908_c5_g1	2448	18.125	3.27	4.245	endoglucanase 12-like [Asparagus officinalis]	GO:0030245;GO:0030245;GO:0016021;GO:0016021;GO:0008810;GO:0008810	BP:cellulose catabolic process;BP:cellulose catabolic process;CC:integral component of membrane;CC:integral component of membrane;MF:cellulase activity;MF:cellulase activity;	------	------	------	------	------	------	gi|75144679|sp|Q7XUK4.2|GUN12_ORYSJ;	RecName: Full=Endoglucanase 12; AltName: Full=Endo-1,4-beta glucanase 12; AltName: Full=OsGLU3;	PF00759.16	Glyco_hydro_9	Glycosyl hydrolase family 9
TRINITY_DN59918_c8_g2	3008	0.75	0.005	0.95		------	------	------	------	------	------	------	------	------	------	------	------	------
TRINITY_DN59927_c0_g1	1618	7.65	0.315	0.495	DNA binding protein, putative [Ricinus communis]	GO:0006355;GO:0006351;GO:0006355;GO:0006351;GO:0006355;GO:0006351;GO:0005634;GO:0005634;GO:0005634;GO:0003677;GO:0003677;GO:0003677	BP:regulation of transcription, DNA-templated;BP:transcription, DNA-templated;BP:regulation of transcription, DNA-templated;BP:transcription, DNA-templated;BP:regulation of transcription, DNA-templated;BP:transcription, DNA-templated;CC:nucleus;CC:nucleus;CC:nucleus;MF:DNA binding;MF:DNA binding;MF:DNA binding;	------	------	------	------	------	------	gi|347602439|sp|P0DH85.1|REM10_ARATH;	RecName: Full=B3 domain-containing protein REM10; AltName: Full=Protein REPRODUCTIVE MERISTEM 10;	PF02362.18	B3	B3 DNA binding domain
TRINITY_DN59938_c4_g1	5400	3.53	43.095	20.96	PREDICTED: uncharacterized protein LOC105056691 isoform X1 [Elaeis guineensis]	------	------	------	------	------	------	------	------	------	------	PF06075.9	DUF936	Plant protein of unknown function
TRINITY_DN59958_c6_g2	1280	0	1.19	0.68		------	------	------	------	------	------	------	------	------	------	------	------	------
TRINITY_DN60011_c5_g1	2424	1.415	4.86	2.55	PREDICTED: uncharacterized protein LOC105059269 isoform X1 [Elaeis guineensis]	------	------	------	------	------	------	------	------	------	------	------	------	------
TRINITY_DN60026_c4_g7	1823	121.575	10.99	27.58	7-deoxyloganetin glucosyltransferase-like [Asparagus officinalis]	GO:0008152;GO:0008152;GO:0016758;GO:0016758	BP:metabolic process;BP:metabolic process;MF:transferase activity, transferring hexosyl groups;MF:transferase activity, transferring hexosyl groups;	K21374	UGT85A	------	------	------	------	gi|678019172|sp|F8WKW1.1|UGT2_GARJA;	RecName: Full=7-deoxyloganetin glucosyltransferase; AltName: Full=Genipin glucosyltransferase; AltName: Full=UDP-glucose glucosyltransferase 2; Short=GjUGT2; AltName: Full=UDP-glycosyltransferase 85A24;	PF00201.15	UDPGT	UDP-glucoronosyl and UDP-glucosyl transferase
TRINITY_DN60075_c0_g7	675	20.205	2.985	14.42	PREDICTED: U-box domain-containing protein 52-like [Elaeis guineensis]	GO:0006950;GO:0005524;GO:0004672;GO:0004842;GO:0005524;GO:0004672;GO:0004842	BP:response to stress;MF:ATP binding;MF:protein kinase activity;MF:ubiquitin-protein transferase activity;MF:ATP binding;MF:protein kinase activity;MF:ubiquitin-protein transferase activity;	------	------	------	------	------	------	gi|75262617|sp|Q9FKG6.1|PUB52_ARATH;	RecName: Full=U-box domain-containing protein 52; AltName: Full=Plant U-box protein 52; Includes: RecName: Full=E3 ubiquitin ligase; Includes: RecName: Full=Serine/threonine-protein kinase;	PF04564.12	U-box	U-box domain
TRINITY_DN60118_c0_g1	1507	36.28	5.94	17.69	4-coumarate--CoA ligase-like 7 [Dendrobium catenatum]	GO:0008152;GO:0008152;GO:0016874;GO:0016874	BP:metabolic process;BP:metabolic process;MF:ligase activity;MF:ligase activity;	------	------	------	------	------	------	gi|75289692|sp|Q69RG7.1|4CLL7_ORYSJ;	RecName: Full=4-coumarate--CoA ligase-like 7;	PF00501.25;PF13193.3	AMP-binding;AMP-binding_C	AMP-binding enzyme;AMP-binding enzyme C-terminal domain
TRINITY_DN60133_c4_g3	2040	0.025	1.365	1.13	probable serine/threonine-protein kinase At1g54610 isoform X2 [Asparagus officinalis]	GO:0005524;GO:0004672;GO:0005524;GO:0004672	MF:ATP binding;MF:protein kinase activity;MF:ATP binding;MF:protein kinase activity;	------	------	------	------	------	------	gi|75339093|sp|Q9ZVM9.1|Y1461_ARATH;	RecName: Full=Probable serine/threonine-protein kinase At1g54610;	PF00069.22;PF07714.14	Pkinase;Pkinase_Tyr	Protein kinase domain;Protein tyrosine kinase
TRINITY_DN60135_c3_g2	841	0	1.89	4.035	carbonic anhydrase, chloroplastic-like [Asparagus officinalis]	------	------	------	------	------	------	------	------	gi|1168740|sp|P46513.1|CAH2_FLALI;	RecName: Full=Carbonic anhydrase 2; AltName: Full=Carbonate dehydratase 2;	------	------	------
TRINITY_DN60150_c1_g1	1483	3.67	0.115	0.415	unnamed protein product, partial [Vitis vinifera]	GO:0009651;GO:0006839;GO:0009651;GO:0005618;GO:0009507;GO:0016021;GO:0005739;GO:0005774;GO:0005618;GO:0009507;GO:0016021;GO:0005743;GO:0005774;GO:0015114	BP:response to salt stress;BP:mitochondrial transport;BP:response to salt stress;CC:cell wall;CC:chloroplast;CC:integral component of membrane;CC:mitochondrion;CC:vacuolar membrane;CC:cell wall;CC:chloroplast;CC:integral component of membrane;CC:mitochondrial inner membrane;CC:vacuolar membrane;MF:phosphate ion transmembrane transporter activity;	K15102	SLC25A3, PHC, PIC	------	------	------	------	gi|75309219|sp|Q9FMU6.1|MPCP3_ARATH;	RecName: Full=Mitochondrial phosphate carrier protein 3, mitochondrial; AltName: Full=Mitochondrial phosphate transporter 3; Short=MPT3; AltName: Full=Phosphate transporter 3;1; Flags: Precursor;	------	------	------
TRINITY_DN60194_c4_g4	990	20.945	2.91	24.67	Sugar carrier protein C [Ananas comosus]	GO:0016021;GO:0016021;GO:0016021;GO:0022857;GO:0022857;GO:0022857	CC:integral component of membrane;CC:integral component of membrane;CC:integral component of membrane;MF:transmembrane transporter activity;MF:transmembrane transporter activity;MF:transmembrane transporter activity;	------	------	------	------	------	------	gi|75340022|sp|Q39228.1|STP4_ARATH;	RecName: Full=Sugar transport protein 4; AltName: Full=Hexose transporter 4;	PF00083.21	Sugar_tr	Sugar
TRINITY_DN60221_c3_g1	1137	4.4	0.085	0.085	putative 12-oxophytodienoate reductase 11 [Amborella trichopoda]	GO:0010181;GO:0016491;GO:0010181;GO:0016491;GO:0010181;GO:0016491	MF:FMN binding;MF:oxidoreductase activity;MF:FMN binding;MF:oxidoreductase activity;MF:FMN binding;MF:oxidoreductase activity;	K05894	OPR	map00592	alpha-Linolenic acid metabolism	------	------	gi|338818374|sp|B9FSC8.1|OPR11_ORYSJ;	RecName: Full=Putative 12-oxophytodienoate reductase 11; AltName: Full=OPDA-reductase 11; Short=OsOPR11;	PF00724.17	Oxidored_FMN	NAD
TRINITY_DN60221_c3_g4	984	2.12	0	0	12-oxophytodienoate reductase 2 isoform X2 [Prunus persica]	GO:0010181;GO:0016491;GO:0010181;GO:0016491	MF:FMN binding;MF:oxidoreductase activity;MF:FMN binding;MF:oxidoreductase activity;	K05894	OPR	map00592	alpha-Linolenic acid metabolism	------	------	gi|338818374|sp|B9FSC8.1|OPR11_ORYSJ;	RecName: Full=Putative 12-oxophytodienoate reductase 11; AltName: Full=OPDA-reductase 11; Short=OsOPR11;	------	------	------
TRINITY_DN60224_c6_g1	1019	1.845	53.2	10.835	uncharacterized protein LOC109828875 [Asparagus officinalis]	------	------	------	------	------	------	------	------	------	------	------	------	------
TRINITY_DN60224_c8_g1	809	3.945	0.09	0.92	receptor-like serine/threonine-protein kinase SD1-8 [Asparagus officinalis]	------	------	------	------	------	------	------	------	gi|75319440|sp|Q39086.1|SD17_ARATH;	RecName: Full=Receptor-like serine/threonine-protein kinase SD1-7; AltName: Full=Arabidopsis thaliana receptor kinase 1; AltName: Full=S-domain-1;	PF07714.14;PF00069.22;PF11883.5	Pkinase_Tyr;Pkinase;DUF3403	Protein tyrosine kinase;Protein kinase domain;Domain of unknown function
TRINITY_DN60231_c5_g3	3059	24.48	4.17	1.785	3-oxoacyl-[acyl-carrier-protein] synthase I, chloroplastic, partial [Asparagus officinalis]	GO:0006633;GO:0006633;GO:0006633;GO:0016747;GO:0016747;GO:0016747	BP:fatty acid biosynthetic process;BP:fatty acid biosynthetic process;BP:fatty acid biosynthetic process;MF:transferase activity, transferring acyl groups other than amino-acyl groups;MF:transferase activity, transferring acyl groups other than amino-acyl groups;MF:transferase activity, transferring acyl groups other than amino-acyl groups;	K09458	fabF	map00780;map00061	Biotin metabolism;Fatty acid biosynthesis	COG0304	I:Lipid transport and metabolism	gi|119784|sp|P23902.1|KASC1_HORVU;	RecName: Full=3-oxoacyl-[acyl-carrier-protein] synthase I, chloroplastic; AltName: Full=Beta-ketoacyl-ACP synthase I; Short=KAS I; Flags: Precursor;	PF00109.23;PF02801.19;PF00108.20	ketoacyl-synt;Ketoacyl-synt_C;Thiolase_N	Beta-ketoacyl synthase, N-terminal domain;Beta-ketoacyl synthase, C-terminal domain;Thiolase, N-terminal domain
TRINITY_DN60247_c0_g2	2187	0.07	2.175	0.275	PREDICTED: primary amine oxidase [Elaeis guineensis]	GO:0009308;GO:0005507;GO:0008131;GO:0048038	BP:amine metabolic process;MF:copper ion binding;MF:primary amine oxidase activity;MF:quinone binding;	K00276	AOC3, AOC2, tynA	map00260;map00960;map00950;map00360;map00350;map00410	Glycine, serine and threonine metabolism;Tropane, piperidine and pyridine alkaloid biosynthesis;Isoquinoline alkaloid biosynthesis;Phenylalanine metabolism;Tyrosine metabolism;beta-Alanine metabolism	------	------	gi|2501337|sp|Q43077.1|AMO_PEA;	RecName: Full=Primary amine oxidase; AltName: Full=Amine oxidase [copper-containing]; Flags: Precursor;	PF01179.17;PF02728.13;PF02727.13	Cu_amine_oxid;Cu_amine_oxidN3;Cu_amine_oxidN2	Copper amine oxidase, enzyme domain;Copper amine oxidase, N3 domain;Copper amine oxidase, N2 domain
TRINITY_DN60279_c0_g1	2302	64.865	18.285	24.76	nonexpressor of pathogenesis-related protein 1 [Gladiolus hybrid cultivar]	------	------	K14508	NPR1	map04075	Plant hormone signal transduction	COG0666	R:General function prediction only	gi|75301128|sp|Q8L746.1|NPR3_ARATH;	RecName: Full=Regulatory protein NPR3; AltName: Full=BTB/POZ domain-containing protein NPR3;	PF12313.5	NPR1_like_C	NPR1/NIM1 like defence protein C terminal
TRINITY_DN60292_c5_g5	1509	1.96	0.035	0.15		------	------	------	------	------	------	------	------	------	------	------	------	------
TRINITY_DN60357_c4_g1	828	8.07	57.82	105.355	Copper centre C	GO:0016020;GO:0005507;GO:0004129	CC:membrane;MF:copper ion binding;MF:cytochrome-c oxidase activity;	------	------	------	------	------	------	------	------	------	------	------
TRINITY_DN60388_c3_g1	887	0	1.78	0.73		------	------	------	------	------	------	------	------	------	------	------	------	------
TRINITY_DN60388_c3_g2	1321	7.015	0.34	2.755		------	------	------	------	------	------	------	------	------	------	------	------	------
TRINITY_DN60400_c1_g1	567	4.57	0	2.73		------	------	------	------	------	------	------	------	------	------	------	------	------
TRINITY_DN60400_c1_g6	2121	0.155	3.695	12.66		------	------	------	------	------	------	------	------	------	------	------	------	------
TRINITY_DN60420_c7_g2	2901	15.325	1.515	2.04	PREDICTED: protein SPA1-RELATED 4-like isoform X1 [Phoenix dactylifera]	GO:0005524;GO:0004672	MF:ATP binding;MF:protein kinase activity;	------	------	------	------	------	------	gi|75335085|sp|Q9LJR3.1|SPA3_ARATH;	RecName: Full=Protein SPA1-RELATED 3;	PF00400.29;PF00069.22	WD40;Pkinase	WD domain, G-beta repeat;Protein kinase domain
TRINITY_DN60423_c1_g4	872	0	4.085	0.525		------	------	------	------	------	------	------	------	------	------	------	------	------
TRINITY_DN60424_c5_g2	1384	6.31	2	0.715	PREDICTED: 1-acylglycerol-3-phosphate O-acyltransferase-like [Fragaria vesca subsp. vesca]	GO:0016746;GO:0016746	MF:transferase activity, transferring acyl groups;MF:transferase activity, transferring acyl groups;	------	------	------	------	------	------	gi|678000774|sp|Q0J0A4.3|LPAAT_ORYSJ;	RecName: Full=Probable 1-acylglycerol-3-phosphate O-acyltransferase; AltName: Full=Lipid droplet-binding protein CGI-58 homolog;	------	------	------
TRINITY_DN60427_c0_g1	4291	5.94	0.96	0.495	uncharacterized protein LOC109834202 isoform X2 [Asparagus officinalis]	------	------	------	------	------	------	------	------	------	------	------	------	------
TRINITY_DN60510_c2_g2	1040	22.78	0.215	0.03		------	------	------	------	------	------	------	------	------	------	------	------	------
TRINITY_DN60526_c0_g1	709	56.495	6.615	16.67	receptor-like serine/threonine-protein kinase SD1-8 [Asparagus officinalis]	GO:0048544;GO:0016021;GO:0005524;GO:0004674	BP:recognition of pollen;CC:integral component of membrane;MF:ATP binding;MF:protein serine/threonine kinase activity;	------	------	------	------	------	------	gi|75319440|sp|Q39086.1|SD17_ARATH;	RecName: Full=Receptor-like serine/threonine-protein kinase SD1-7; AltName: Full=Arabidopsis thaliana receptor kinase 1; AltName: Full=S-domain-1;	PF07714.14;PF00069.22;PF11883.5	Pkinase_Tyr;Pkinase;DUF3403	Protein tyrosine kinase;Protein kinase domain;Domain of unknown function
TRINITY_DN60526_c0_g3	882	5.685	0.2	4.225	receptor-like serine/threonine-protein kinase SD1-8 [Asparagus officinalis]	------	------	------	------	------	------	------	------	gi|75319440|sp|Q39086.1|SD17_ARATH;	RecName: Full=Receptor-like serine/threonine-protein kinase SD1-7; AltName: Full=Arabidopsis thaliana receptor kinase 1; AltName: Full=S-domain-1;	PF07714.14;PF00069.22;PF11883.5	Pkinase_Tyr;Pkinase;DUF3403	Protein tyrosine kinase;Protein kinase domain;Domain of unknown function
TRINITY_DN60537_c1_g2	849	3.265	0	0		------	------	------	------	------	------	------	------	------	------	------	------	------
TRINITY_DN60544_c4_g5	969	69.855	15.56	24.65	UPF0481 protein [Apostasia shenzhenica]	GO:0016021;GO:0016021	CC:integral component of membrane;CC:integral component of membrane;	------	------	------	------	------	------	gi|75203068|sp|Q9SD53.1|Y3720_ARATH;	RecName: Full=UPF0481 protein At3g47200;	PF03140.12	DUF247	Plant protein of unknown function
TRINITY_DN60557_c5_g4	1391	37.18	8.895	10.075	extra-large guanine nucleotide-binding protein 3 isoform X3 [Asparagus officinalis]	------	------	------	------	------	------	------	------	gi|75168876|sp|Q9C516.1|XLG3_ARATH;	RecName: Full=Extra-large guanine nucleotide-binding protein 3; AltName: Full=Extra-large GTP-binding protein 3; Short=Extra-large G-protein 3;	------	------	------
TRINITY_DN60607_c0_g1	1318	6.515	0.56	1.36	uncharacterized protein A4U43_C05F29830 [Asparagus officinalis]	------	------	------	------	------	------	------	------	------	------	PF03478.15	DUF295	Protein of unknown function
TRINITY_DN60608_c1_g1	506	33.885	6.32	9.445	PREDICTED: aspartic proteinase-like protein 2 [Elaeis guineensis]	GO:0016021;GO:0016021;GO:0004190;GO:0004190;GO:0004190	CC:integral component of membrane;CC:integral component of membrane;MF:aspartic-type endopeptidase activity;MF:aspartic-type endopeptidase activity;MF:aspartic-type endopeptidase activity;	------	------	------	------	------	------	gi|118572746|sp|Q9S9K4.2|ASPL2_ARATH;	RecName: Full=Aspartic proteinase-like protein 2; Flags: Precursor;	PF14543.3;PF00026.20	TAXi_N;Asp	Xylanase inhibitor N-terminal;Eukaryotic aspartyl protease
TRINITY_DN60608_c2_g1	700	101.905	8.84	25.135	WRKY transcription factor WRKY24 isoform X1 [Medicago truncatula]	GO:0006351;GO:0006351;GO:0005634;GO:0005634;GO:0003700;GO:0043565;GO:0003700;GO:0043565	BP:transcription, DNA-templated;BP:transcription, DNA-templated;CC:nucleus;CC:nucleus;MF:transcription factor activity, sequence-specific DNA binding;MF:sequence-specific DNA binding;MF:transcription factor activity, sequence-specific DNA binding;MF:sequence-specific DNA binding;	K13424	WRKY33	map04016;map04626	MAPK signaling pathway - plant;Plant-pathogen interaction	------	------	gi|148887455|sp|Q8S8P5.2|WRK33_ARATH;	RecName: Full=Probable WRKY transcription factor 33; AltName: Full=WRKY DNA-binding protein 33;	PF03106.12	WRKY	WRKY DNA -binding domain
TRINITY_DN60609_c0_g1	1311	2.16	8.765	9.4		------	------	------	------	------	------	------	------	------	------	------	------	------
TRINITY_DN60616_c4_g1	2846	0.025	4.705	1.125	PREDICTED: uncharacterized protein LOC105974520 [Erythranthe guttata]	------	------	------	------	------	------	------	------	------	------	PF14111.3	DUF4283	Domain of unknown function
TRINITY_DN60638_c9_g1	2142	2.85	0.355	1.54	rust resistance kinase Lr10-like [Ananas comosus]	------	------	------	------	------	------	------	------	gi|75319119|sp|P93604.1|LRK10_WHEAT;	RecName: Full=Rust resistance kinase Lr10; AltName: Full=Probable receptor-like serine/threonine-protein kinase LRK10; Flags: Precursor;	PF00069.22;PF07714.14;PF13947.3	Pkinase;Pkinase_Tyr;GUB_WAK_bind	Protein kinase domain;Protein tyrosine kinase;Wall-associated receptor kinase galacturonan-binding
TRINITY_DN60659_c1_g2	2603	528.045	101.185	259.715	Actin/actin-like conserved site-containing protein [Cynara cardunculus var. scolymus]	GO:0005524;GO:0005524;GO:0004386;GO:0005524;GO:0005524	MF:ATP binding;MF:ATP binding;MF:helicase activity;MF:ATP binding;MF:ATP binding;	K10355	ACTF	------	------	------	------	gi|148886768|sp|P0C539.1|ACT2_ORYSI;	RecName: Full=Actin-2 >gi|148886769|sp|A3C6D7.1|ACT2_ORYSJ RecName: Full=Actin-2;	PF00022.16	Actin	Actin
TRINITY_DN60674_c3_g2	3525	7.27	0.96	5.805	lysine-specific demethylase JMJ25-like isoform X1 [Ananas comosus]	------	------	K15601	KDM3	------	------	------	------	gi|75207508|sp|Q9SSE9.1|JMJ25_ARATH;	RecName: Full=Lysine-specific demethylase JMJ25; AltName: Full=Jumonji domain-containing protein 25; AltName: Full=Lysine-specific histone demethylase JMJ25; AltName: Full=Protein INCREASE IN BONSAI METHYLATION 1; AltName: Full=Protein JUMONJI 25;	PF02373.19;PF07727.11	JmjC;RVT_2	JmjC domain, hydroxylase;Reverse transcriptase
TRINITY_DN60675_c1_g1	656	41.405	2.485	8.71	PREDICTED: uncharacterized protein LOC105045033 [Elaeis guineensis]	GO:0005783	CC:endoplasmic reticulum;	------	------	------	------	------	------	------	------	------	------	------
TRINITY_DN60711_c1_g2	1611	193.095	18.54	214.68	aspartyl protease family protein At5g10770-like [Ananas comosus]	GO:0004190	MF:aspartic-type endopeptidase activity;	------	------	------	------	------	------	gi|75160614|sp|Q8S9J6.1|ASPA_ARATH;	RecName: Full=Aspartyl protease family protein At5g10770; Flags: Precursor;	PF14543.3;PF00026.20;PF14541.3	TAXi_N;Asp;TAXi_C	Xylanase inhibitor N-terminal;Eukaryotic aspartyl protease;Xylanase inhibitor C-terminal
TRINITY_DN60727_c4_g2	808	0	3.67	1.91	PREDICTED: somatic embryogenesis receptor kinase 2-like [Phoenix dactylifera]	GO:0007165;GO:0007165;GO:0007165;GO:0007165;GO:0016021;GO:0016021;GO:0016021;GO:0016021;GO:0005524;GO:0004674;GO:0005102;GO:0005524;GO:0004674;GO:0005102;GO:0005524;GO:0004674;GO:0005102;GO:0005524;GO:0004674;GO:0005102	BP:signal transduction;BP:signal transduction;BP:signal transduction;BP:signal transduction;CC:integral component of membrane;CC:integral component of membrane;CC:integral component of membrane;CC:integral component of membrane;MF:ATP binding;MF:protein serine/threonine kinase activity;MF:receptor binding;MF:ATP binding;MF:protein serine/threonine kinase activity;MF:receptor binding;MF:ATP bindin…	K13416;K13418	BAK1;SERK1	map04016;map04626;map04075	MAPK signaling pathway - plant;Plant-pathogen interaction;Plant hormone signal transduction	------	------	gi|254814126|sp|Q9SKG5.2|SERK4_ARATH;	RecName: Full=Somatic embryogenesis receptor kinase 4; Short=AtSERK4; AltName: Full=Protein BAK1-like 1; Short=AtBKK1; AltName: Full=Somatic embryogenesis receptor-like kinase 2; Flags: Precursor;	PF07714.14;PF00069.22	Pkinase_Tyr;Pkinase	Protein tyrosine kinase;Protein kinase domain
TRINITY_DN60727_c4_g3	1617	0	1.805	1.805	somatic embryogenesis receptor kinase 2 [Chenopodium quinoa]	GO:0007165;GO:0007165;GO:0007165;GO:0016021;GO:0016021;GO:0016021;GO:0016021;GO:0005524;GO:0004672;GO:0005102;GO:0005524;GO:0005102;GO:0004714;GO:0005524;GO:0004672;GO:0005102;GO:0005524;GO:0004672;GO:0005102	BP:signal transduction;BP:signal transduction;BP:signal transduction;CC:integral component of membrane;CC:integral component of membrane;CC:integral component of membrane;CC:integral component of membrane;MF:ATP binding;MF:protein kinase activity;MF:receptor binding;MF:ATP binding;MF:receptor binding;MF:transmembrane receptor protein tyrosine kinase activity;MF:ATP binding;MF:protein kinase activ…	K13418	SERK1	------	------	------	------	gi|29427920|sp|Q94F62.2|BAK1_ARATH;	RecName: Full=BRASSINOSTEROID INSENSITIVE 1-associated receptor kinase 1; Short=AtBAK1; Short=BRI1-associated receptor kinase 1; AltName: Full=Protein ELONGATED; AltName: Full=Somatic embryogenesis receptor kinase 3; Short=AtSERK3; AltName: Full=Somatic embryogenesis receptor-like kinase 3; Flags: Precursor;	PF07714.14;PF00069.22	Pkinase_Tyr;Pkinase	Protein tyrosine kinase;Protein kinase domain
TRINITY_DN60737_c8_g1	1480	0	1.375	0.715		------	------	------	------	------	------	------	------	------	------	PF13966.3	zf-RVT	zinc-binding in reverse transcriptase
TRINITY_DN60737_c9_g1	886	2.84	16.59	19.26		------	------	------	------	------	------	------	------	------	------	------	------	------
TRINITY_DN60765_c5_g2	535	1.855	50.235	3.345		------	------	------	------	------	------	------	------	------	------	------	------	------
TRINITY_DN60818_c5_g4	2087	3.525	16.99	17.12		------	------	------	------	------	------	------	------	------	------	------	------	------
TRINITY_DN60837_c1_g3	2188	162.11	18.02	95.2	UDP-glucuronic acid decarboxylase 4-like [Asparagus officinalis]	GO:0016021	CC:integral component of membrane;	K08678	UXS1, uxs	map00520	Amino sugar and nucleotide sugar metabolism	------	------	gi|75330962|sp|Q8S8T4.1|UXS4_ARATH;	RecName: Full=UDP-glucuronic acid decarboxylase 4; AltName: Full=UDP-XYL synthase 4; AltName: Full=UDP-glucuronate decarboxylase 4; Short=UGD; Short=UXS-4;	PF16363.2;PF01370.18	GDP_Man_Dehyd;Epimerase	GDP-mannose 4,6 dehydratase;NAD dependent epimerase/dehydratase family
TRINITY_DN60837_c1_g6	1330	15.77	3.37	7.865	UDP-xylose synthase [Ornithogalum longebracteatum]	GO:0042732;GO:0016021;GO:0016021;GO:0005802;GO:0070403;GO:0048040	BP:D-xylose metabolic process;CC:integral component of membrane;CC:integral component of membrane;CC:trans-Golgi network;MF:NAD+ binding;MF:UDP-glucuronate decarboxylase activity;	K08678	UXS1, uxs	map00520	Amino sugar and nucleotide sugar metabolism	COG0451	M:Cell wall/membrane/envelope biogenesis	gi|75330962|sp|Q8S8T4.1|UXS4_ARATH;	RecName: Full=UDP-glucuronic acid decarboxylase 4; AltName: Full=UDP-XYL synthase 4; AltName: Full=UDP-glucuronate decarboxylase 4; Short=UGD; Short=UXS-4;	PF16363.2;PF01370.18;PF04321.14;PF07993.9;PF01073.16	GDP_Man_Dehyd;Epimerase;RmlD_sub_bind;NAD_binding_4;3Beta_HSD	GDP-mannose 4,6 dehydratase;NAD dependent epimerase/dehydratase family;RmlD substrate binding domain;Male sterility protein;3-beta hydroxysteroid dehydrogenase/isomerase family
TRINITY_DN60840_c2_g3	977	0	1.59	2.285		------	------	------	------	------	------	------	------	------	------	------	------	------
TRINITY_DN60846_c1_g5	957	14.25	2.22	4.04	4-coumarate--CoA ligase-like 7 [Dendrobium catenatum]	GO:0008152;GO:0016874	BP:metabolic process;MF:ligase activity;	K01904	4CL	map00940;map00130;map00360	Phenylpropanoid biosynthesis;Ubiquinone and other terpenoid-quinone biosynthesis;Phenylalanine metabolism	------	------	gi|209572803|sp|Q0DV32.2|4CLL1_ORYSJ;	RecName: Full=4-coumarate--CoA ligase-like 1;	PF00501.25;PF13193.3	AMP-binding;AMP-binding_C	AMP-binding enzyme;AMP-binding enzyme C-terminal domain
TRINITY_DN60849_c5_g1	502	12.975	0.84	0.745		------	------	------	------	------	------	------	------	------	------	------	------	------
TRINITY_DN60850_c0_g1	1368	5.465	57.445	67.485	trans-resveratrol di-O-methyltransferase-like [Ananas comosus]	GO:0008171;GO:0046983	MF:O-methyltransferase activity;MF:protein dimerization activity;	K16040	ROMT	map00945	Stilbenoid, diarylheptanoid and gingerol biosynthesis	------	------	gi|403399690|sp|B6VJS4.2|ROMT_VITVI;	RecName: Full=Trans-resveratrol di-O-methyltransferase; AltName: Full=Resveratrol O-methyltransferase; Short=ROMT; Short=VvROMT;	PF00891.15;PF08100.8	Methyltransf_2;Dimerisation	O-methyltransferase;Dimerisation domain
TRINITY_DN60856_c0_g2	267	0	38.71	3.89	Protein root hair defective 3 [Apostasia shenzhenica]	GO:0005789;GO:0016021;GO:0005789;GO:0016021;GO:0005789;GO:0016021;GO:0005525;GO:0003924;GO:0005525;GO:0003924;GO:0005525;GO:0003924	CC:endoplasmic reticulum membrane;CC:integral component of membrane;CC:endoplasmic reticulum membrane;CC:integral component of membrane;CC:endoplasmic reticulum membrane;CC:integral component of membrane;MF:GTP binding;MF:GTPase activity;MF:GTP binding;MF:GTPase activity;MF:GTP binding;MF:GTPase activity;	------	------	------	------	------	------	gi|122228672|sp|Q0JLS6.1|RHD3_ORYSJ;	RecName: Full=Protein ROOT HAIR DEFECTIVE 3; AltName: Full=Protein SEY1 homolog 1;	------	------	------
TRINITY_DN60869_c0_g8	860	0	2.85	0.475	hypothetical protein AXF42_Ash000349 [Apostasia shenzhenica]	GO:0005743;GO:0005525;GO:0005525;GO:0005525;GO:0005525;GO:0005525	CC:mitochondrial inner membrane;MF:GTP binding;MF:GTP binding;MF:GTP binding;MF:GTP binding;MF:GTP binding;	K19828	MTG1	------	------	------	------	gi|75245670|sp|Q8L607.1|SIN2_ARATH;	RecName: Full=Short integuments 2, mitochondrial; AltName: Full=DAR GTPase 1; Flags: Precursor;	------	------	------
TRINITY_DN60895_c1_g1	2469	82.51	7.77	5.76	protein CCA1-like isoform X2 [Asparagus officinalis]	GO:0006355;GO:0006351;GO:0006355;GO:0006351;GO:0005634;GO:0005634;GO:0003677;GO:0003677	BP:regulation of transcription, DNA-templated;BP:transcription, DNA-templated;BP:regulation of transcription, DNA-templated;BP:transcription, DNA-templated;CC:nucleus;CC:nucleus;MF:DNA binding;MF:DNA binding;	K12133	LHY	map04712	Circadian rhythm - plant	------	------	------	------	------	------	------
TRINITY_DN60926_c3_g1	1208	170.87	31.22	48.405	PREDICTED: protein NRT1/ PTR FAMILY 6.2-like isoform X1 [Phoenix dactylifera]	GO:0006857;GO:0006857;GO:0006857;GO:0006857;GO:0016021;GO:0016021;GO:0016021;GO:0016021;GO:0022857;GO:0022857;GO:0022857;GO:0022857	BP:oligopeptide transport;BP:oligopeptide transport;BP:oligopeptide transport;BP:oligopeptide transport;CC:integral component of membrane;CC:integral component of membrane;CC:integral component of membrane;CC:integral component of membrane;MF:transmembrane transporter activity;MF:transmembrane transporter activity;MF:transmembrane transporter activity;MF:transmembrane transporter activity;	K14638	SLC15A3_4, PHT	------	------	------	------	gi|75314150|sp|Q9SZY4.1|PTR27_ARATH;	RecName: Full=Protein NRT1/ PTR FAMILY 6.2; Short=AtNPF6.2; AltName: Full=Nitrate transporter 1.4;	PF00854.18	PTR2	POT family
TRINITY_DN60935_c1_g4	1313	1.57	0.155	0.52		------	------	------	------	------	------	------	------	------	------	------	------	------
TRINITY_DN60937_c0_g1	1643	0.25	3.13	0.695	PREDICTED: putative F-box protein At1g47790 [Elaeis guineensis]	------	------	------	------	------	------	------	------	gi|75266820|sp|Q9T0J4.1|FB249_ARATH;	RecName: Full=Putative F-box protein At4g38870;	PF00646.30;PF08268.9;PF12937.4;PF07734.10	F-box;FBA_3;F-box-like;FBA_1	F-box domain;F-box associated domain;F-box-like;F-box associated
TRINITY_DN60961_c1_g5	1430	3.485	0.225	0.375	PREDICTED: oxysterol-binding protein-related protein 3C-like isoform X3 [Phoenix dactylifera]	------	------	------	------	------	------	------	------	gi|75266215|sp|Q9SR33.1|ORP3B_ARATH;	RecName: Full=Oxysterol-binding protein-related protein 3B; AltName: Full=OSBP-related protein 3B;	------	------	------
TRINITY_DN60964_c0_g1	1279	0.41	3.055	1.735	PREDICTED: LOW QUALITY PROTEIN: hydroquinone glucosyltransferase-like [Phoenix dactylifera]	GO:0008152;GO:0008152;GO:0008152;GO:0016758;GO:0016758;GO:0016758	BP:metabolic process;BP:metabolic process;BP:metabolic process;MF:transferase activity, transferring hexosyl groups;MF:transferase activity, transferring hexosyl groups;MF:transferase activity, transferring hexosyl groups;	K08237	E2.4.1.218	------	------	------	------	gi|28380078|sp|Q9AR73.1|HQGT_RAUSE;	RecName: Full=Hydroquinone glucosyltransferase; AltName: Full=Arbutin synthase;	PF00201.15	UDPGT	UDP-glucoronosyl and UDP-glucosyl transferase
TRINITY_DN61035_c0_g1	2228	74.735	15.41	54.875	PREDICTED: lysine histidine transporter 1-like [Musa acuminata subsp. malaccensis]	------	------	------	------	------	------	COG0814	E:Amino acid transport and metabolism	gi|75262627|sp|Q9FKS8.1|LHT1_ARATH;	RecName: Full=Lysine histidine transporter 1;	PF01490.15;PF03222.10	Aa_trans;Trp_Tyr_perm	Transmembrane amino acid transporter protein;Tryptophan/tyrosine permease family
TRINITY_DN61068_c7_g2	745	3.135	0	0.135		------	------	------	------	------	------	------	------	------	------	------	------	------
TRINITY_DN61073_c1_g3	593	277.61	21.735	14.055	ABC transporter G family member 39 [Asparagus officinalis]	GO:0016021;GO:0005524;GO:0016887	CC:integral component of membrane;MF:ATP binding;MF:ATPase activity;	------	------	------	------	------	------	gi|75328828|sp|Q8GU88.1|AB39G_ORYSJ;	RecName: Full=ABC transporter G family member 39; Short=OsABCG39; AltName: Full=Pleiotropic drug resistance protein 7; Short=OsPDR7;	------	------	------
TRINITY_DN61073_c1_g5	1291	1.75	0.06	0.42	uncharacterized protein A4U43_C08F6690 [Asparagus officinalis]	------	------	------	------	------	------	------	------	gi|75328828|sp|Q8GU88.1|AB39G_ORYSJ;	RecName: Full=ABC transporter G family member 39; Short=OsABCG39; AltName: Full=Pleiotropic drug resistance protein 7; Short=OsPDR7;	PF01061.21	ABC2_membrane	ABC-2 type transporter
TRINITY_DN61082_c1_g4	792	10.765	1.69	2.36	UPF0496 protein 1 [Dichanthelium oligosanthes]	GO:0016021;GO:0016021;GO:0016021;GO:0016021;GO:0016021	CC:integral component of membrane;CC:integral component of membrane;CC:integral component of membrane;CC:integral component of membrane;CC:integral component of membrane;	------	------	------	------	------	------	gi|122247414|sp|Q10QE9.1|U496A_ORYSJ;	RecName: Full=UPF0496 protein 1 >gi|158706402|sp|A2XDK8.1|U496A_ORYSI RecName: Full=UPF0496 protein 1;	PF05055.9	DUF677	Protein of unknown function
TRINITY_DN61114_c2_g3	4184	20.3	2.71	2.345	uncharacterized protein A4U43_C05F27150 [Asparagus officinalis]	------	------	K09060	GBF	------	------	------	------	gi|1169081|sp|Q99089.1|CPRF1_PETCR;	RecName: Full=Common plant regulatory factor 1; Short=CPRF-1;	PF00170.18;PF16596.2;PF07777.8	bZIP_1;MFMR_assoc;MFMR	bZIP transcription factor;Disordered region downstream of MFMR;G-box binding protein MFMR
TRINITY_DN61132_c1_g4	1080	2.315	26.445	14.605	PREDICTED: expansin-like B1 [Elaeis guineensis]	GO:0005576;GO:0005576;GO:0005576;GO:0005576	CC:extracellular region;CC:extracellular region;CC:extracellular region;CC:extracellular region;	------	------	------	------	------	------	gi|22095652|sp|O23547.2|EXLB1_ARATH;	RecName: Full=Expansin-like B1; Short=At-EXPR1; Short=AtEXLB1; Short=AtEXPR1; AltName: Full=Ath-ExpBeta-3.1; Flags: Precursor;	PF01357.18;PF03330.15	Pollen_allerg_1;DPBB_1	Pollen allergen;Lytic transglycolase
TRINITY_DN61157_c3_g6	4171	0.065	0.705	1.23	hypothetical protein VITISV_012765 [Vitis vinifera]	GO:0015074;GO:0015074;GO:0015074;GO:0015074;GO:0003676;GO:0003676;GO:0003676;GO:0003676	BP:DNA integration;BP:DNA integration;BP:DNA integration;BP:DNA integration;MF:nucleic acid binding;MF:nucleic acid binding;MF:nucleic acid binding;MF:nucleic acid binding;	K20477	RGP1	------	------	------	------	gi|130582|sp|P10978.1|POLX_TOBAC;	RecName: Full=Retrovirus-related Pol polyprotein from transposon TNT 1-94; Includes: RecName: Full=Protease; Includes: RecName: Full=Reverse transcriptase; Includes: RecName: Full=Endonuclease;	------	------	------
TRINITY_DN61165_c1_g1	1584	0.1	1.67	1.045		------	------	------	------	------	------	------	------	------	------	------	------	------
TRINITY_DN61166_c0_g1	2739	3.83	0.875	1.07	hypothetical protein CRG98_007345 [Punica granatum]	GO:0003676;GO:0008270;GO:0003676;GO:0008270;GO:0003676;GO:0008270;GO:0003676;GO:0008270	MF:nucleic acid binding;MF:zinc ion binding;MF:nucleic acid binding;MF:zinc ion binding;MF:nucleic acid binding;MF:zinc ion binding;MF:nucleic acid binding;MF:zinc ion binding;	------	------	------	------	------	------	------	------	------	------	------
TRINITY_DN61254_c0_g5	2581	0.365	2.845	1.245	probable leucine-rich repeat receptor-like protein kinase At1g35710 [Asparagus officinalis]	GO:0016021;GO:0016301	CC:integral component of membrane;MF:kinase activity;	K00876	udk, UCK	map00240	Pyrimidine metabolism	------	------	gi|263430760|sp|C0LGQ5.1|GSO1_ARATH;	RecName: Full=LRR receptor-like serine/threonine-protein kinase GSO1; AltName: Full=Protein GASSHO 1; Flags: Precursor;	PF13855.3;PF12799.4;PF08263.9	LRR_8;LRR_4;LRRNT_2	Leucine rich repeat;Leucine Rich repeats;Leucine rich repeat N-terminal domain
TRINITY_DN61289_c1_g1	1089	117.77	18.675	38.08	Protein kinase domain [Macleaya cordata]	GO:0048544;GO:0048544;GO:0048544;GO:0048544;GO:0016021;GO:0016021;GO:0016021;GO:0016021;GO:0005524;GO:0004674;GO:0005524;GO:0030246;GO:0004674;GO:0005524;GO:0030246;GO:0004674;GO:0005524;GO:0030246;GO:0004674	BP:recognition of pollen;BP:recognition of pollen;BP:recognition of pollen;BP:recognition of pollen;CC:integral component of membrane;CC:integral component of membrane;CC:integral component of membrane;CC:integral component of membrane;MF:ATP binding;MF:protein serine/threonine kinase activity;MF:ATP binding;MF:carbohydrate binding;MF:protein serine/threonine kinase activity;MF:ATP binding;MF:car…	------	------	------	------	------	------	gi|75099051|sp|O64477.1|Y2913_ARATH;	RecName: Full=G-type lectin S-receptor-like serine/threonine-protein kinase At2g19130; Flags: Precursor;	PF00069.22;PF07714.14;PF01636.20	Pkinase;Pkinase_Tyr;APH	Protein kinase domain;Protein tyrosine kinase;Phosphotransferase enzyme family
TRINITY_DN61295_c4_g8	2023	0.105	1.19	1.175	formin-binding protein 4 isoform X2 [Asparagus officinalis]	------	------	------	------	------	------	------	------	------	------	PF00397.23	WW	WW domain
TRINITY_DN61296_c3_g1	3549	0.025	1.155	5.575	PREDICTED: putative disease resistance protein RGA3 [Elaeis guineensis]	GO:0043531;GO:0043531	MF:ADP binding;MF:ADP binding;	------	------	------	------	------	------	gi|29839649|sp|Q9LRR4.1|R13L1_ARATH;	RecName: Full=Putative disease resistance RPP13-like protein 1;	PF00931.19;PF12799.4;PF13855.3;PF05729.9	NB-ARC;LRR_4;LRR_8;NACHT	NB-ARC domain;Leucine Rich repeats;Leucine rich repeat;NACHT domain
TRINITY_DN61303_c2_g1	1776	0.22	159.185	0.6	PREDICTED: vicilin-like antimicrobial peptides 2-3 [Nicotiana attenuata]	GO:0045735;GO:0045735;GO:0045735	MF:nutrient reservoir activity;MF:nutrient reservoir activity;MF:nutrient reservoir activity;	------	------	------	------	------	------	gi|75266171|sp|Q9SPL4.1|AMP22_MACIN;	RecName: Full=Vicilin-like antimicrobial peptides 2-2; AltName: Full=MiAMP2; Contains: RecName: Full=Antimicrobial peptide 2a; AltName: Full=MiAMP2a; Contains: RecName: Full=Antimicrobial peptide 2b; AltName: Full=MiAMP2b; Contains: RecName: Full=Antimicrobial peptide 2c-1; AltName: Full=MiAMP2c-1; Contains: RecName: Full=Antimicrobial peptide 2c-2; AltName: Full=MiAMP2c-2; Contains: RecName: Ful…	PF00190.19;PF07883.8	Cupin_1;Cupin_2	Cupin;Cupin domain
TRINITY_DN61312_c1_g1	819	80.18	3.545	17.955		------	------	------	------	------	------	------	------	------	------	------	------	------
TRINITY_DN61318_c3_g6	1059	0	4.905	6.34		------	------	------	------	------	------	------	------	------	------	------	------	------
TRINITY_DN61332_c1_g1	822	0	3.8	5.77		------	------	------	------	------	------	------	------	------	------	------	------	------
TRINITY_DN61335_c0_g3	1220	5.915	0.11	0.195	uncharacterized protein A4U43_C05F19150 [Asparagus officinalis]	------	------	------	------	------	------	------	------	gi|75172668|sp|Q9FVS1.1|FBK23_ARATH;	RecName: Full=F-box/kelch-repeat protein At1g57790;	PF03478.15	DUF295	Protein of unknown function
TRINITY_DN61342_c0_g1	3511	8.6	2.29	3.09	PREDICTED: uncharacterized protein LOC103696875 isoform X1 [Phoenix dactylifera]	GO:0031011;GO:0031011;GO:0031011;GO:0031011	CC:Ino80 complex;CC:Ino80 complex;CC:Ino80 complex;CC:Ino80 complex;	------	------	------	------	------	------	------	------	PF13919.3	ASXH	Asx homology domain
TRINITY_DN61362_c0_g2	419	34.32	0.9	7.075		------	------	------	------	------	------	------	------	------	------	------	------	------
TRINITY_DN61381_c2_g3	2001	0.07	6.955	2.235	hypothetical protein GOBAR_AA27236 [Gossypium barbadense]	GO:0004185;GO:0004185	MF:serine-type carboxypeptidase activity;MF:serine-type carboxypeptidase activity;	K16297	SCPL-II	------	------	------	------	gi|1706082|sp|P52711.1|CBP23_HORVU;	RecName: Full=Serine carboxypeptidase II-3; AltName: Full=CP-MII.3; Contains: RecName: Full=Serine carboxypeptidase II-3 chain A; Contains: RecName: Full=Serine carboxypeptidase II-3 chain B; Flags: Precursor;	------	------	------
TRINITY_DN61396_c3_g1	3373	3.925	39.705	116.695	putative LOV domain-containing protein [Xeronema callistemon]	------	------	K12116	FKF1	map04712	Circadian rhythm - plant	------	------	gi|110832734|sp|Q2R2W1.2|ADO3_ORYSJ;	RecName: Full=Adagio-like protein 3;	PF13418.3;PF13415.3;PF13854.3;PF07646.12;PF01344.22;PF00646.30;PF12937.4;PF13426.4;PF00989.22;PF08448.7	Kelch_4;Kelch_3;Kelch_5;Kelch_2;Kelch_1;F-box;F-box-like;PAS_9;PAS;PAS_4	Galactose oxidase, central domain;Galactose oxidase, central domain;Kelch motif;Kelch motif;Kelch motif;F-box domain;F-box-like;PAS domain;PAS fold;PAS fold
TRINITY_DN61399_c0_g3	836	3.36	0.215	0.595	hypothetical protein MA16_Dca026288 [Dendrobium catenatum]	GO:0016021	CC:integral component of membrane;	------	------	------	------	------	------	------	------	------	------	------
TRINITY_DN61438_c5_g1	2806	6.445	1.615	1.485	cytochrome c biogenesis F	------	------	------	------	------	------	------	------	------	------	------	------	------
TRINITY_DN61461_c2_g1	552	11.495	0.15	0		------	------	------	------	------	------	------	------	------	------	------	------	------
TRINITY_DN61466_c0_g1	1093	4.07	0.1	0.26		------	------	------	------	------	------	------	------	------	------	------	------	------
TRINITY_DN61486_c1_g4	3018	0.06	0.71	1.23	Protein of unknown function DUF2921 [Macleaya cordata]	GO:0016021;GO:0016021;GO:0016021;GO:0016021	CC:integral component of membrane;CC:integral component of membrane;CC:integral component of membrane;CC:integral component of membrane;	------	------	------	------	------	------	------	------	PF11145.5	DUF2921	Protein of unknown function
TRINITY_DN61487_c2_g1	1429	41.3	12.99	15.225	probable protein phosphatase 2C 26 [Asparagus officinalis]	GO:0004722	MF:protein serine/threonine phosphatase activity;	------	------	------	------	------	------	gi|75135808|sp|Q6ZGY0.1|P2C26_ORYSJ;	RecName: Full=Probable protein phosphatase 2C 26; Short=OsPP2C26;	PF00481.18;PF07228.9	PP2C;SpoIIE	Protein phosphatase 2C;Stage II sporulation protein E
TRINITY_DN61488_c1_g2	2633	1.375	5.945	5.905	PREDICTED: probable glycosyltransferase At3g07620 [Phoenix dactylifera]	GO:0006486;GO:0006486;GO:0016021;GO:0016021;GO:0016757;GO:0016757	BP:protein glycosylation;BP:protein glycosylation;CC:integral component of membrane;CC:integral component of membrane;MF:transferase activity, transferring glycosyl groups;MF:transferase activity, transferring glycosyl groups;	------	------	------	------	------	------	------	------	------	------	------
TRINITY_DN61497_c1_g1	405	121.215	735.75	121.95	PREDICTED: uncharacterized protein LOC103968493 [Musa acuminata subsp. malaccensis]	------	------	------	------	------	------	------	------	------	------	------	------	------
TRINITY_DN61507_c0_g4	498	35.525	5.585	22.595	uncharacterized protein A4U43_C07F13200 [Asparagus officinalis]	------	------	------	------	------	------	------	------	------	------	------	------	------
TRINITY_DN61518_c1_g1	5743	2.305	6.79	5.59		------	------	------	------	------	------	------	------	------	------	------	------	------
TRINITY_DN61541_c1_g1	372	49.35	4.155	8.195	PREDICTED: cytochrome P450 81E8-like [Phoenix dactylifera]	GO:0020037;GO:0005506;GO:0004497;GO:0016705;GO:0020037;GO:0005506;GO:0016705;GO:0020037;GO:0005506;GO:0004497;GO:0016705;GO:0020037;GO:0005506;GO:0004497;GO:0016705	MF:heme binding;MF:iron ion binding;MF:monooxygenase activity;MF:oxidoreductase activity, acting on paired donors, with incorporation or reduction of molecular oxygen;MF:heme binding;MF:iron ion binding;MF:oxidoreductase activity, acting on paired donors, with incorporation or reduction of molecular oxygen;MF:heme binding;MF:iron ion binding;MF:monooxygenase activity;MF:oxidoreductase activity, a…	------	------	------	------	------	------	gi|13878373|sp|Q9FG65.1|C81D1_ARATH;	RecName: Full=Cytochrome P450 81D1;	------	------	------
TRINITY_DN61541_c2_g1	498	3.815	26.69	5.905	cytochrome P450 81D11-like [Durio zibethinus]	GO:0016021;GO:0020037;GO:0005506;GO:0004497;GO:0016705;GO:0020037;GO:0005506;GO:0004497;GO:0016705	CC:integral component of membrane;MF:heme binding;MF:iron ion binding;MF:monooxygenase activity;MF:oxidoreductase activity, acting on paired donors, with incorporation or reduction of molecular oxygen;MF:heme binding;MF:iron ion binding;MF:monooxygenase activity;MF:oxidoreductase activity, acting on paired donors, with incorporation or reduction of molecular oxygen;	------	------	------	------	------	------	gi|75293246|sp|Q6WNQ9.1|C81E9_MEDTR;	RecName: Full=Isoflavone 3'-hydroxylase; AltName: Full=Cytochrome P450 81E9, partial [Medicago truncatula];	PF00067.19	p450	Cytochrome P450
TRINITY_DN61549_c1_g2	3990	7.72	1.75	3.07	probable isoprenylcysteine alpha-carbonyl methylesterase ICMEL1, partial [Asparagus officinalis]	------	------	K15889	PCME	map00900	Terpenoid backbone biosynthesis	COG0657	I:Lipid transport and metabolism	gi|122180205|sp|Q1PET6.1|ICML2_ARATH;	RecName: Full=Probable isoprenylcysteine alpha-carbonyl methylesterase ICMEL2; AltName: Full=Isoprenylcysteine methylesterase-like protein 2;	PF07859.10;PF00135.25;PF00326.18;PF12146.5;PF02230.13;PF01738.15;PF05705.11	Abhydrolase_3;COesterase;Peptidase_S9;Hydrolase_4;Abhydrolase_2;DLH;DUF829	alpha/beta hydrolase fold;Carboxylesterase family;Prolyl oligopeptidase family;Serine aminopeptidase, S33;Phospholipase/Carboxylesterase;Dienelactone hydrolase family;Eukaryotic protein of unknown function
TRINITY_DN61560_c0_g5	918	1.635	0	1.125		------	------	------	------	------	------	------	------	------	------	------	------	------
TRINITY_DN61568_c1_g1	736	56.155	9.715	31.35	PREDICTED: D-3-phosphoglycerate dehydrogenase 3, chloroplastic-like [Phoenix dactylifera]	GO:0006564;GO:0006564;GO:0006564;GO:0051287;GO:0004617;GO:0051287;GO:0004617;GO:0051287;GO:0004617	BP:L-serine biosynthetic process;BP:L-serine biosynthetic process;BP:L-serine biosynthetic process;MF:NAD binding;MF:phosphoglycerate dehydrogenase activity;MF:NAD binding;MF:phosphoglycerate dehydrogenase activity;MF:NAD binding;MF:phosphoglycerate dehydrogenase activity;	K00058	serA, PHGDH	map00260	Glycine, serine and threonine metabolism	------	------	gi|3122858|sp|O04130.2|SERA2_ARATH;	RecName: Full=D-3-phosphoglycerate dehydrogenase 2, chloroplastic; Short=PGDH; Flags: Precursor;	PF00389.27;PF02826.16	2-Hacid_dh;2-Hacid_dh_C	D-isomer specific 2-hydroxyacid dehydrogenase, catalytic domain;D-isomer specific 2-hydroxyacid dehydrogenase, NAD binding domain
TRINITY_DN61591_c4_g3	2022	2.235	0.195	0.32	LEAF RUST 10 DISEASE-RESISTANCE LOCUS RECEPTOR-LIKE PROTEIN KINASE-like 1.2 [Phalaenopsis equestris]	------	------	------	------	------	------	------	------	------	------	------	------	------
TRINITY_DN61604_c4_g1	1775	1.43	0.025	0.265	hypothetical protein CISIN_1g037486mg [Citrus sinensis]	------	------	------	------	------	------	------	------	------	------	PF13952.3;PF13960.3	DUF4216;DUF4218	Domain of unknown function;Domain of unknown function
TRINITY_DN61604_c4_g3	2513	1.545	0	0.605	Transposon, En/Spm-like protein [Corchorus capsularis]	GO:0016020;GO:0003676;GO:0008270	CC:membrane;MF:nucleic acid binding;MF:zinc ion binding;	------	------	------	------	------	------	------	------	PF13952.3;PF13960.3	DUF4216;DUF4218	Domain of unknown function;Domain of unknown function
TRINITY_DN61617_c3_g1	1299	0.835	8.77	15.73	crocetin glucosyltransferase [Crocus ancyrensis]	GO:0008152;GO:0008152;GO:0008152;GO:0016758;GO:0016758;GO:0016758	BP:metabolic process;BP:metabolic process;BP:metabolic process;MF:transferase activity, transferring hexosyl groups;MF:transferase activity, transferring hexosyl groups;MF:transferase activity, transferring hexosyl groups;	K13691	SGT1	------	------	------	------	gi|75293337|sp|Q6X1C0.1|GLT2_CROSA;	RecName: Full=Crocetin glucosyltransferase 2;	------	------	------
TRINITY_DN61647_c0_g4	779	4136.97	261.59	3211.32	PREDICTED: pathogenesis-related protein 1-like [Elaeis guineensis]	GO:0006952;GO:0009607;GO:0006952;GO:0009607;GO:0006952;GO:0009607	BP:defense response;BP:response to biotic stimulus;BP:defense response;BP:response to biotic stimulus;BP:defense response;BP:response to biotic stimulus;	------	------	------	------	------	------	gi|548591|sp|Q05736.1|PR1_ASPOF;	RecName: Full=Pathogenesis-related protein 1; Short=AOPR1;	PF00407.16	Bet_v_1	Pathogenesis-related protein Bet v I family
TRINITY_DN61672_c4_g1	2125	0.295	6.705	3.56	PREDICTED: double-stranded RNA-binding protein 3-like isoform X1 [Malus domestica]	GO:0003723;GO:0003723	MF:RNA binding;MF:RNA binding;	------	------	------	------	------	------	gi|75244423|sp|Q8GY79.1|DRB5_ARATH;	RecName: Full=Double-stranded RNA-binding protein 5; AltName: Full=dsRNA-binding protein 5; Short=AtDRB5;	PF05922.13;PF00035.23	Inhibitor_I9;dsrm	Peptidase inhibitor I9;Double-stranded RNA binding motif
TRINITY_DN61688_c1_g1	1460	55.1	8.7	20.075	PREDICTED: receptor-like serine/threonine-protein kinase SD1-8 isoform X1 [Elaeis guineensis]	GO:0048544;GO:0016021;GO:0005524;GO:0004674	BP:recognition of pollen;CC:integral component of membrane;MF:ATP binding;MF:protein serine/threonine kinase activity;	------	------	------	------	------	------	gi|363548529|sp|O81832.4|Y4729_ARATH;	RecName: Full=G-type lectin S-receptor-like serine/threonine-protein kinase At4g27290; Flags: Precursor;	PF01453.21;PF00954.17;PF08276.8	B_lectin;S_locus_glycop;PAN_2	D-mannose binding lectin;S-locus glycoprotein domain;PAN-like domain
TRINITY_DN61709_c0_g1	1490	2.405	13.685	4.16	putative beta-glucosidase 5 isoform X2 [Arabidopsis lyrata subsp. lyrata]	GO:0005975;GO:0005975;GO:0004553;GO:0004553	BP:carbohydrate metabolic process;BP:carbohydrate metabolic process;MF:hydrolase activity, hydrolyzing O-glycosyl compounds;MF:hydrolase activity, hydrolyzing O-glycosyl compounds;	K01188;K05350	E3.2.1.21;bglB	map00460;map00940;map00500	Cyanoamino acid metabolism;Phenylpropanoid biosynthesis;Starch and sucrose metabolism	------	------	gi|281312228|sp|Q8RZL1.2|BGL03_ORYSJ;	RecName: Full=Beta-glucosidase 3; Short=Os1bglu3; Flags: Precursor;	PF00232.15	Glyco_hydro_1	Glycosyl hydrolase family 1
TRINITY_DN61720_c1_g1	1202	39.71	4.335	6.33	probable leucine-rich repeat receptor-like protein kinase At5g63930 isoform X1 [Asparagus officinalis]	GO:0016021;GO:0005524;GO:0004672	CC:integral component of membrane;MF:ATP binding;MF:protein kinase activity;	------	------	------	------	------	------	gi|75097645|sp|O22938.1|PXC3_ARATH;	RecName: Full=Leucine-rich repeat receptor-like tyrosine-protein kinase PXC3; AltName: Full=Protein PXY/TDR-CORRELATED 3; Flags: Precursor;	PF00069.22;PF13855.3;PF07714.14;PF12799.4	Pkinase;LRR_8;Pkinase_Tyr;LRR_4	Protein kinase domain;Leucine rich repeat;Protein tyrosine kinase;Leucine Rich repeats
TRINITY_DN61760_c3_g3	1535	15.56	2.18	7.22	uncharacterized protein A4U43_C03F3360 [Asparagus officinalis]	------	------	------	------	------	------	------	------	gi|75173385|sp|Q9FZ95.1|PUP3_ARATH;	RecName: Full=Purine permease 3; Short=AtPUP3;	PF16913.2;PF00892.17	PUNUT;EamA	Purine nucleobase transmembrane transport;EamA-like transporter family
TRINITY_DN61769_c1_g2	651	46.375	1.76	2.28	PREDICTED: LOW QUALITY PROTEIN: protein LHY-like [Elaeis guineensis]	GO:0006355;GO:0006351;GO:0005634;GO:0003677	BP:regulation of transcription, DNA-templated;BP:transcription, DNA-templated;CC:nucleus;MF:DNA binding;	K12133	LHY	map04712	Circadian rhythm - plant	------	------	gi|269969425|sp|Q6R0H1.2|LHY_ARATH;	RecName: Full=Protein LHY; AltName: Full=MYB-related transcription factor LHY; AltName: Full=Protein LATE ELONGATED HYPOCOTYL;	PF00249.28;PF13921.3;PF15963.2	Myb_DNA-binding;Myb_DNA-bind_6;Myb_DNA-bind_7	Myb-like DNA-binding domain;Myb-like DNA-binding domain;Myb DNA-binding like
TRINITY_DN61801_c2_g2	1965	59.52	10.915	13.62	PREDICTED: L-ascorbate oxidase homolog isoform X1 [Elaeis guineensis]	------	------	------	------	------	------	------	------	gi|114268|sp|Q00624.1|ASOL_BRANA;	RecName: Full=L-ascorbate oxidase homolog; Flags: Precursor;	PF07731.11	Cu-oxidase_2	Multicopper oxidase
TRINITY_DN61810_c1_g7	587	6.235	0.065	2.615	PREDICTED: benzyl alcohol O-benzoyltransferase [Musa acuminata subsp. malaccensis]	GO:0016747	MF:transferase activity, transferring acyl groups other than amino-acyl groups;	------	------	------	------	------	------	gi|75150383|sp|Q8GT20.1|BEBT_TOBAC;	RecName: Full=Benzyl alcohol O-benzoyltransferase; AltName: Full=Benzoyl coenzyme A:benzyl alcohol benzoyl transferase;	PF02458.12	Transferase	Transferase family
TRINITY_DN61819_c3_g1	557	49.73	170.74	38.58		------	------	------	------	------	------	------	------	------	------	------	------	------
TRINITY_DN61820_c6_g1	598	1.145	11.74	26.865	zinc finger protein 8 [Populus trichocarpa]	GO:0003676;GO:0003676	MF:nucleic acid binding;MF:nucleic acid binding;	------	------	------	------	------	------	gi|75328211|sp|Q84WI0.1|GIS_ARATH;	RecName: Full=Zinc finger protein GIS; AltName: Full=Protein GLABROUS INFLORESCENCE STEMS;	PF13912.3;PF13894.3	zf-C2H2_6;zf-C2H2_4	C2H2-type zinc finger;C2H2-type zinc finger
TRINITY_DN61825_c1_g4	1302	5.13	23.885	14.315	cytochrome P450 71A1-like isoform X1 [Asparagus officinalis]	GO:0020037;GO:0005506;GO:0004497;GO:0016705;GO:0020037;GO:0005506;GO:0004497;GO:0016705	MF:heme binding;MF:iron ion binding;MF:monooxygenase activity;MF:oxidoreductase activity, acting on paired donors, with incorporation or reduction of molecular oxygen;MF:heme binding;MF:iron ion binding;MF:monooxygenase activity;MF:oxidoreductase activity, acting on paired donors, with incorporation or reduction of molecular oxygen;	------	------	------	------	------	------	gi|311033356|sp|P24465.2|C71A1_PERAE;	RecName: Full=Cytochrome P450 71A1; AltName: Full=ARP-2; AltName: Full=CYPLXXIA1 [Persea americana];	PF00067.19	p450	Cytochrome P450
TRINITY_DN61832_c1_g2	664	9.005	0.64	1.47	uncharacterized protein A4U43_C03F9120 [Asparagus officinalis]	------	------	------	------	------	------	------	------	gi|75319440|sp|Q39086.1|SD17_ARATH;	RecName: Full=Receptor-like serine/threonine-protein kinase SD1-7; AltName: Full=Arabidopsis thaliana receptor kinase 1; AltName: Full=S-domain-1;	PF11883.5;PF07714.14	DUF3403;Pkinase_Tyr	Domain of unknown function;Protein tyrosine kinase
TRINITY_DN61859_c1_g2	1744	490.155	77.07	160.63	PREDICTED: 1-aminocyclopropane-1-carboxylate oxidase 3 [Elaeis guineensis]	GO:0046872;GO:0016491;GO:0046872;GO:0016491;GO:0046872;GO:0016491	MF:metal ion binding;MF:oxidoreductase activity;MF:metal ion binding;MF:oxidoreductase activity;MF:metal ion binding;MF:oxidoreductase activity;	K05933	E1.14.17.4	map00270	Cysteine and methionine metabolism	------	------	gi|17366969|sp|Q9MB94.1|ACCO_PRUMU;	RecName: Full=1-aminocyclopropane-1-carboxylate oxidase; Short=ACC oxidase; AltName: Full=Ethylene-forming enzyme; Short=EFE;	PF03171.17;PF14226.3	2OG-FeII_Oxy;DIOX_N	2OG-F;non-haem dioxygenase in morphine synthesis N-terminal
TRINITY_DN61906_c4_g1	3334	1.78	0.345	0.91	zinc finger MYM-type protein 1-like [Asparagus officinalis]	------	------	------	------	------	------	------	------	gi|74743897|sp|Q5SVZ6.1|ZMYM1_HUMAN;	RecName: Full=Zinc finger MYM-type protein 1;	PF14291.3;PF05699.11	DUF4371;Dimer_Tnp_hAT	Domain of unknown function;hAT family C-terminal dimerisation region
TRINITY_DN61911_c1_g1	867	0.125	5.46	4.765	PREDICTED: uncharacterized protein LOC103718576 [Phoenix dactylifera]	------	------	------	------	------	------	------	------	------	------	PF04398.9	DUF538	Protein of unknown function, DUF538
TRINITY_DN61914_c4_g1	1838	6.215	1.075	1.635	PREDICTED: F-box protein At4g35930-like [Elaeis guineensis]	------	------	------	------	------	------	------	------	gi|75252287|sp|Q5XF11.1|FB248_ARATH;	RecName: Full=F-box protein At4g35930;	------	------	------
TRINITY_DN61941_c5_g1	1638	6.795	0.015	0.13		------	------	------	------	------	------	------	------	------	------	------	------	------
TRINITY_DN61958_c0_g1	1091	0	1.525	0.075		------	------	------	------	------	------	------	------	------	------	------	------	------
TRINITY_DN61960_c0_g2	1506	28.115	7.56	8.875	phosphatidylinositol/phosphatidylcholine transfer protein SFH6-like isoform X2 [Asparagus officinalis]	GO:0016021;GO:0016021	CC:integral component of membrane;CC:integral component of membrane;	------	------	------	------	------	------	gi|544604662|sp|F4IHJ0.1|SFH8_ARATH;	RecName: Full=Phosphatidylinositol/phosphatidylcholine transfer protein SFH8; AltName: Full=Protein SEC FOURTEEN HOMOLOGS 8; Short=AtSFH8;	PF00650.17;PF13716.3	CRAL_TRIO;CRAL_TRIO_2	CRAL/TRIO domain;Divergent CRAL/TRIO domain
TRINITY_DN61971_c2_g5	1519	1.79	10.685	4.31		------	------	------	------	------	------	------	------	------	------	------	------	------
TRINITY_DN61996_c0_g5	360	22.51	0.49	0	rust resistance kinase Lr10-like [Hevea brasiliensis]	------	------	------	------	------	------	------	------	------	------	------	------	------
TRINITY_DN62014_c1_g8	1500	1.995	0.165	0.42		------	------	------	------	------	------	------	------	------	------	------	------	------
TRINITY_DN62017_c10_g1	1915	2.575	0.32	1.065		------	------	------	------	------	------	------	------	------	------	------	------	------
TRINITY_DN62021_c2_g2	1773	0.285	4.735	2.68		------	------	------	------	------	------	------	------	------	------	------	------	------
TRINITY_DN62029_c0_g2	2721	30.12	8.835	9.685	PREDICTED: chaperone protein ClpD2, chloroplastic [Phoenix dactylifera]	GO:0019538;GO:0019538;GO:0005524;GO:0005524	BP:protein metabolic process;BP:protein metabolic process;MF:ATP binding;MF:ATP binding;	------	------	------	------	COG0542	O:Posttranslational modification, protein turnover, chaperones	gi|347602485|sp|Q7XL03.2|CLPD2_ORYSJ;	RecName: Full=Chaperone protein ClpD2, chloroplastic; AltName: Full=ATP-dependent Clp protease ATP-binding subunit ClpD homolog 2; AltName: Full=Casein lytic proteinase D2; Flags: Precursor;	PF07724.11;PF00004.26;PF02861.17;PF07728.11;PF13191.3	AAA_2;AAA;Clp_N;AAA_5;AAA_16	AAA domain;ATPase family associated with various cellular activities;Clp amino terminal domain, pathogenicity island component;AAA domain;AAA ATPase domain
TRINITY_DN62032_c2_g1	1773	8.915	3.18	29.015	zinc finger MYM-type protein 1-like [Populus trichocarpa]	------	------	------	------	------	------	------	------	gi|74743897|sp|Q5SVZ6.1|ZMYM1_HUMAN;	RecName: Full=Zinc finger MYM-type protein 1;	PF14291.3	DUF4371	Domain of unknown function
TRINITY_DN62036_c1_g1	1411	3.87	19.03	11.03	LOW QUALITY PROTEIN: serpin-ZXA-like [Asparagus officinalis]	GO:0005615	CC:extracellular space;	K13963	SERPINB	------	------	------	------	gi|75281963|sp|Q40066.1|SPZX_HORVU;	RecName: Full=Serpin-ZX; AltName: Full=BSZx; AltName: Full=HorvuZx;	PF00079.17	Serpin	Serpin
TRINITY_DN62053_c0_g1	3535	17.1	1.73	10.65	PREDICTED: receptor kinase-like protein Xa21 [Elaeis guineensis]	------	------	K04733	IRAK4	------	------	------	------	gi|264664489|sp|C0LGP4.1|Y3475_ARATH;	RecName: Full=Probable LRR receptor-like serine/threonine-protein kinase At3g47570; Flags: Precursor;	PF13855.3;PF00069.22;PF07714.14;PF12799.4;PF08263.9	LRR_8;Pkinase;Pkinase_Tyr;LRR_4;LRRNT_2	Leucine rich repeat;Protein kinase domain;Protein tyrosine kinase;Leucine Rich repeats;Leucine rich repeat N-terminal domain
TRINITY_DN62076_c4_g1	2754	28.545	4.185	3.1	LOW QUALITY PROTEIN: putative serine/threonine-protein kinase [Asparagus officinalis]	GO:0005524;GO:0004674;GO:0005524;GO:0004674	MF:ATP binding;MF:protein serine/threonine kinase activity;MF:ATP binding;MF:protein serine/threonine kinase activity;	K04733	IRAK4	------	------	COG0515	T:Signal transduction mechanisms	gi|313471762|sp|C0LGN2.1|Y3148_ARATH;	RecName: Full=Probable leucine-rich repeat receptor-like serine/threonine-protein kinase At3g14840; Flags: Precursor;	PF07714.14;PF00069.22;PF01636.20	Pkinase_Tyr;Pkinase;APH	Protein tyrosine kinase;Protein kinase domain;Phosphotransferase enzyme family
TRINITY_DN62084_c4_g4	929	367.195	75.61	70.815	remorin 4.1-like [Asparagus officinalis]	------	------	------	------	------	------	------	------	gi|34925093|sp|P93788.1|REMO_SOLTU;	RecName: Full=Remorin; AltName: Full=pp34;	PF03763.10	Remorin_C	Remorin, C-terminal region
TRINITY_DN62118_c0_g2	821	0	6.16	2.36		------	------	------	------	------	------	------	------	gi|75147390|sp|Q84NJ4.1|H2A3_ORYSJ;	RecName: Full=Probable histone H2A.3 >gi|158513647|sp|A2YVE5.1|H2A3_ORYSI RecName: Full=Probable histone H2A.3;	------	------	------
TRINITY_DN62149_c4_g1	1505	84.315	12.29	7.875	PREDICTED: uncharacterized protein LOC105042756 [Elaeis guineensis]	GO:0045454;GO:0035556;GO:0045454;GO:0035556;GO:0005622;GO:0005622;GO:0009055;GO:0015035;GO:0009055;GO:0015035	BP:cell redox homeostasis;BP:intracellular signal transduction;BP:cell redox homeostasis;BP:intracellular signal transduction;CC:intracellular;CC:intracellular;MF:electron carrier activity;MF:protein disulfide oxidoreductase activity;MF:electron carrier activity;MF:protein disulfide oxidoreductase activity;	------	------	------	------	------	------	------	------	PF04784.11;PF00610.18;PF00042.19	DUF547;DEP;Globin	Protein of unknown function, DUF547;Domain found in Dishevelled, Egl-10, and Pleckstrin;Globin
TRINITY_DN62162_c1_g1	1535	39.615	4.83	5.465	PREDICTED: leucine-rich repeat receptor-like tyrosine-protein kinase PXC3 [Elaeis guineensis]	GO:0016021;GO:0005524;GO:0004672	CC:integral component of membrane;MF:ATP binding;MF:protein kinase activity;	------	------	------	------	------	------	gi|75097645|sp|O22938.1|PXC3_ARATH;	RecName: Full=Leucine-rich repeat receptor-like tyrosine-protein kinase PXC3; AltName: Full=Protein PXY/TDR-CORRELATED 3; Flags: Precursor;	PF13855.3;PF12799.4	LRR_8;LRR_4	Leucine rich repeat;Leucine Rich repeats
TRINITY_DN62188_c3_g3	3375	16.09	3.725	8.085	probable galactinol--sucrose galactosyltransferase 6 [Asparagus officinalis]	GO:0016757	MF:transferase activity, transferring glycosyl groups;	K06617	E2.4.1.82	map00052	Galactose metabolism	------	------	gi|269969643|sp|Q8RX87.2|RFS6_ARATH;	RecName: Full=Probable galactinol--sucrose galactosyltransferase 6; AltName: Full=Protein DARK INDUCIBLE 10; AltName: Full=Raffinose synthase 6;	PF05691.9	Raffinose_syn	Raffinose synthase or seed imbibition protein Sip1
TRINITY_DN62214_c3_g1	788	5.515	0.12	1.04	nuclear speckle RNA-binding protein B-like [Asparagus officinalis]	------	------	K20725	MKS1	map04016	MAPK signaling pathway - plant	------	------	------	------	PF05678.11	VQ	VQ motif
TRINITY_DN62217_c1_g2	7803	0.255	1.455	0.505	uncharacterized protein LOC109827789, partial [Asparagus officinalis]	------	------	------	------	------	------	------	------	gi|130398|sp|P20825.1|POL2_DROME;	RecName: Full=Retrovirus-related Pol polyprotein from transposon 297; Includes: RecName: Full=Protease; Includes: RecName: Full=Reverse transcriptase; Includes: RecName: Full=Endonuclease;	PF00078.24	RVT_1	Reverse transcriptase
TRINITY_DN62238_c3_g1	1314	50.405	5.72	14.41	hypothetical protein AQUCO_02800278v1, partial [Aquilegia coerulea]	GO:0048544;GO:0048544;GO:0048544;GO:0048544;GO:0005524;GO:0004674;GO:0016301;GO:0005524;GO:0004674	BP:recognition of pollen;BP:recognition of pollen;BP:recognition of pollen;BP:recognition of pollen;MF:ATP binding;MF:protein serine/threonine kinase activity;MF:kinase activity;MF:ATP binding;MF:protein serine/threonine kinase activity;	------	------	------	------	------	------	gi|75220153|sp|O81906.1|B120_ARATH;	RecName: Full=G-type lectin S-receptor-like serine/threonine-protein kinase B120; Flags: Precursor;	PF08276.8	PAN_2	PAN-like domain
TRINITY_DN62250_c7_g1	1489	28.115	4.045	6.4	PREDICTED: E3 ubiquitin-protein ligase PUB23-like [Elaeis guineensis]	GO:0016874;GO:0004842;GO:0016874;GO:0004842	MF:ligase activity;MF:ubiquitin-protein transferase activity;MF:ligase activity;MF:ubiquitin-protein transferase activity;	------	------	------	------	------	------	gi|75148205|sp|Q84TG3.1|PUB23_ARATH;	RecName: Full=E3 ubiquitin-protein ligase PUB23; AltName: Full=Plant U-box protein 23; AltName: Full=U-box domain-containing protein 23;	PF04564.12	U-box	U-box domain
TRINITY_DN62291_c5_g4	991	2.8	0	2.225		------	------	------	------	------	------	------	------	------	------	------	------	------
TRINITY_DN62297_c1_g1	706	252.98	1	25.885	probable linoleate 9S-lipoxygenase 5 [Asparagus officinalis]	------	------	K15718	LOX1_5	map00591	Linoleic acid metabolism	------	------	gi|75282482|sp|Q43191.1|LOX15_SOLTU;	RecName: Full=Probable linoleate 9S-lipoxygenase 5; AltName: Full=Leaf lipoxygenase;	------	------	------
TRINITY_DN62297_c1_g5	1807	1.085	0.04	0.08		------	------	------	------	------	------	------	------	------	------	------	------	------
TRINITY_DN62303_c1_g2	2048	748.63	132.93	136.75	inorganic phosphate transporter 1-4-like [Dendrobium catenatum]	GO:0006817;GO:0006817;GO:0016021;GO:0016021;GO:0005315;GO:0005315	BP:phosphate ion transport;BP:phosphate ion transport;CC:integral component of membrane;CC:integral component of membrane;MF:inorganic phosphate transmembrane transporter activity;MF:inorganic phosphate transmembrane transporter activity;	K08176	PHO84	------	------	------	------	gi|75307847|sp|Q96303.1|PHT14_ARATH;	RecName: Full=Inorganic phosphate transporter 1-4; Short=AtPht1;4; AltName: Full=;	PF00083.21;PF07690.13	Sugar_tr;MFS_1	Sugar;Major Facilitator Superfamily
TRINITY_DN62303_c1_g3	929	0.515	11.77	7.165	LOW QUALITY PROTEIN: inorganic phosphate transporter 1-4-like [Asparagus officinalis]	------	------	K08176	PHO84	------	------	------	------	gi|75299856|sp|Q8H6H0.1|PHT16_ORYSJ;	RecName: Full=Inorganic phosphate transporter 1-6; Short=OsPT6; Short=OsPht1;6; AltName: Full=;	PF00083.21	Sugar_tr	Sugar
TRINITY_DN62322_c0_g1	1130	10.7	1.16	8.885	polygalacturonase inhibitor-like [Asparagus officinalis]	------	------	------	------	------	------	------	------	gi|464367|sp|Q05091.1|PGIP_PYRCO;	RecName: Full=Polygalacturonase inhibitor; AltName: Full=Polygalacturonase-inhibiting protein; Short=PGIG; Flags: Precursor;	PF13855.3;PF12799.4;PF08263.9	LRR_8;LRR_4;LRRNT_2	Leucine rich repeat;Leucine Rich repeats;Leucine rich repeat N-terminal domain
TRINITY_DN62340_c1_g1	2078	0.15	2.22	1.53		------	------	------	------	------	------	------	------	------	------	------	------	------
TRINITY_DN62347_c2_g1	569	97.995	10.185	8.145		------	------	------	------	------	------	------	------	------	------	------	------	------
TRINITY_DN62357_c2_g2	858	154.59	35.37	100.54	PREDICTED: NADPH:quinone oxidoreductase-like [Elaeis guineensis]	GO:0016491	MF:oxidoreductase activity;	------	------	------	------	COG0431	R:General function prediction only	gi|75273736|sp|Q9LK88.1|NQR_ARATH;	RecName: Full=NADPH:quinone oxidoreductase;	PF03358.12;PF02525.14	FMN_red;Flavodoxin_2	NADPH-dependent FMN reductase;Flavodoxin-like fold
[truncated: 160 more rows]
