# Supplementary material for: Iris lactea var. chinensis Plant Drought Tolerance Depends on Response of Proline Metabolism, Transcription Factors, Transporters and the ROS Scavenging System
Source: Research Square preprint supplement (doi:10.21203/rs.3.rs-1312283/v1), 2022-02-08
Supplement: Supplementary file 8 [file ce78b86c506d1b81de9be938.xlsx]

## Sheet: Table S13
Table S13. The differentially expressed transcription factors (TFs) between different treatment
Gene ID	Log2FC(T/CK)	Log2FC(R/T)	Log2FC(R/CK)	length	GO_id	GO_term	Go_description	KO_id	KO_name	Pathway_id	Pathway_definition	COG_id	COG_Functional Categories	NR_hit-name	NR_description	Swiss-Prot_hit-name	Swiss-Prot_description	Pfam_id	Domain	Domain description
AP2/ERF
TRINITY_DN43744_c3_g2	-5.83416	5.00003	-0.840594	1012	GO:0006351;;GO:0006351;;GO:0005634;;GO:0005634;;GO:0003677;;GO:0003700;;GO:0003677;;GO:0003700;	biological_process;;biological_process;;cellular_component;;cellular_component;;molecular_function;;molecular_function;;molecular_function;;molecular_function;;	BP:transcription, DNA-templated;;BP:transcription, DNA-templated;;CC:nucleus;;CC:nucleus;;MF:DNA binding;;MF:transcription factor activity, sequence-specific DNA binding;;MF:DNA binding;;MF:transcription factor activity, sequence-specific DNA binding;;	K09286	EREBP	------	------	------	------	XP_009401653.1	PREDICTED: ethylene-responsive transcription factor 2-like [Musa acuminata subsp. malaccensis]	gi|57012756|sp|Q40476.1|ERF1_TOBAC;;	RecName: Full=Ethylene-responsive transcription factor 1; Short=NtERF1; AltName: Full=Ethylene-responsive element-binding factor 1; Short=EREBP-1;;	PF00847.17	AP2	AP2 domain
TRINITY_DN46201_c15_g1	-5.47257	0.788822	-4.68448	798	GO:0006351;;GO:0006351;;GO:0006351;;GO:0006351;;GO:0005634;;GO:0005634;;GO:0005634;;GO:0005634;;GO:0003677;;GO:0003700;;GO:0003677;;GO:0003700;;GO:0003677;;GO:0003700;;GO:0003677;;GO:0003700;	biological_process;;biological_process;;biological_process;;biological_process;;cellular_component;;cellular_component;;cellular_component;;cellular_component;;molecular_function;;molecular_function;;molecular_function;;molecular_function;;molecular_function;;molecular_function;;molecular_function;;molecular_function;;	BP:transcription, DNA-templated;;BP:transcription, DNA-templated;;BP:transcription, DNA-templated;;BP:transcription, DNA-templated;;CC:nucleus;;CC:nucleus;;CC:nucleus;;CC:nucleus;;MF:DNA binding;;MF:transcription factor activity, sequence-specific DNA binding;;MF:DNA binding;;MF:transcription factor activity, sequence-specific DNA binding;;MF:DNA binding;;MF:transcription factor activity, sequenc…	K14516	ERF1	map04016;;map04075	MAPK signaling pathway - plant;;Plant hormone signal transduction	------	------	XP_008784708.1	PREDICTED: ethylene-responsive transcription factor 1B-like [Phoenix dactylifera]	gi|57012702|sp|Q8LDC8.2|ERF92_ARATH;;	RecName: Full=Ethylene-responsive transcription factor 1B; Short=AtERF1B; AltName: Full=Ethylene-responsive element-binding factor 1B; Short=EREBP-1B;;	PF00847.17	AP2	AP2 domain
TRINITY_DN62800_c2_g1	-3.0951	0.193041	-2.9055	607	GO:0006351;;GO:0005634;;GO:0003677;;GO:0003700;	biological_process;;cellular_component;;molecular_function;;molecular_function;;	BP:transcription, DNA-templated;;CC:nucleus;;MF:DNA binding;;MF:transcription factor activity, sequence-specific DNA binding;;	K09286	EREBP	------	------	------	------	XP_009384458.1	PREDICTED: ethylene-responsive transcription factor 2-like [Musa acuminata subsp. malaccensis]	gi|57012756|sp|Q40476.1|ERF1_TOBAC;;	RecName: Full=Ethylene-responsive transcription factor 1; Short=NtERF1; AltName: Full=Ethylene-responsive element-binding factor 1; Short=EREBP-1;;	PF00847.17	AP2	AP2 domain
TRINITY_DN59330_c0_g1	-3.07196	-2.33302	-5.41176	608	GO:0006351;;GO:0006351;;GO:0005634;;GO:0005634;;GO:0003677;;GO:0003700;;GO:0003677;;GO:0003700;	biological_process;;biological_process;;cellular_component;;cellular_component;;molecular_function;;molecular_function;;molecular_function;;molecular_function;;	BP:transcription, DNA-templated;;BP:transcription, DNA-templated;;CC:nucleus;;CC:nucleus;;MF:DNA binding;;MF:transcription factor activity, sequence-specific DNA binding;;MF:DNA binding;;MF:transcription factor activity, sequence-specific DNA binding;;	------	------	------	------	------	------	PKU71068.1	Ethylene-responsive transcription factor ERF112 [Dendrobium catenatum]	gi|156633603|sp|Q7G1L2.2|RAP26_ARATH;;	RecName: Full=Ethylene-responsive transcription factor RAP2-6; AltName: Full=Protein RELATED TO APETALA2 6;;	PF00847.17	AP2	AP2 domain
TRINITY_DN54527_c2_g2	-2.62035	1.56089	-1.0654	1176	GO:0006351;;GO:0006351;;GO:0006351;;GO:0005634;;GO:0005634;;GO:0005634;;GO:0003677;;GO:0003700;;GO:0003677;;GO:0003700;;GO:0003677;;GO:0003700;	biological_process;;biological_process;;biological_process;;cellular_component;;cellular_component;;cellular_component;;molecular_function;;molecular_function;;molecular_function;;molecular_function;;molecular_function;;molecular_function;;	BP:transcription, DNA-templated;;BP:transcription, DNA-templated;;BP:transcription, DNA-templated;;CC:nucleus;;CC:nucleus;;CC:nucleus;;MF:DNA binding;;MF:transcription factor activity, sequence-specific DNA binding;;MF:DNA binding;;MF:transcription factor activity, sequence-specific DNA binding;;MF:DNA binding;;MF:transcription factor activity, sequence-specific DNA binding;;	------	------	------	------	------	------	XP_020245320.1	ethylene-responsive transcription factor ERF062-like [Asparagus officinalis]	gi|75337746|sp|Q9SVQ0.1|ERF62_ARATH;;	RecName: Full=Ethylene-responsive transcription factor ERF062;;	PF00847.17	AP2	AP2 domain
TRINITY_DN52049_c1_g2	-2.32351	0.805699	-1.52224	918	------	------	------	------	------	------	------	------	------	------	------	------	------	PF00847.17	AP2	AP2 domain
TRINITY_DN59365_c4_g7	2.34825	0.753843	3.09526	447	GO:0006351;;GO:0005634;;GO:0003677;;GO:0003700;	biological_process;;cellular_component;;molecular_function;;molecular_function;;	BP:transcription, DNA-templated;;CC:nucleus;;MF:DNA binding;;MF:transcription factor activity, sequence-specific DNA binding;;	------	------	------	------	------	------	XP_009393593.1	PREDICTED: ethylene-responsive transcription factor ERF053-like [Musa acuminata subsp. malaccensis]	gi|75266005|sp|Q9SKT1.1|ERF53_ARATH;;	RecName: Full=Ethylene-responsive transcription factor ERF053;;	PF00847.17	AP2	AP2 domain
TRINITY_DN48541_c0_g3	3.5077	-1.51714	1.984	1640	GO:0006351;;GO:0006351;;GO:0006351;;GO:0005634;;GO:0005634;;GO:0005634;;GO:0003677;;GO:0003700;;GO:0003677;;GO:0003700;;GO:0003677;;GO:0003700;	biological_process;;biological_process;;biological_process;;cellular_component;;cellular_component;;cellular_component;;molecular_function;;molecular_function;;molecular_function;;molecular_function;;molecular_function;;molecular_function;;	BP:transcription, DNA-templated;;BP:transcription, DNA-templated;;BP:transcription, DNA-templated;;CC:nucleus;;CC:nucleus;;CC:nucleus;;MF:DNA binding;;MF:transcription factor activity, sequence-specific DNA binding;;MF:DNA binding;;MF:transcription factor activity, sequence-specific DNA binding;;MF:DNA binding;;MF:transcription factor activity, sequence-specific DNA binding;;	------	------	------	------	------	------	XP_017700776.1	PREDICTED: dehydration-responsive element-binding protein 2B-like isoform X1 [Phoenix dactylifera]	gi|172044096|sp|A2WL19.2|DRE2A_ORYSI;;	RecName: Full=Dehydration-responsive element-binding protein 2A; Short=Protein DREB2A;;	PF00847.17	AP2	AP2 domain
MYB
TRINITY_DN61769_c1_g2	-4.72657	0.293854	-4.43971	651	GO:0006355;;GO:0006351;;GO:0005634;;GO:0003677;	biological_process;;biological_process;;cellular_component;;molecular_function;;	BP:regulation of transcription, DNA-templated;;BP:transcription, DNA-templated;;CC:nucleus;;MF:DNA binding;;	K12133	LHY	map04712	Circadian rhythm - plant	------	------	XP_010941176.1	PREDICTED: LOW QUALITY PROTEIN: protein LHY-like [Elaeis guineensis]	gi|269969425|sp|Q6R0H1.2|LHY_ARATH;;	RecName: Full=Protein LHY; AltName: Full=MYB-related transcription factor LHY; AltName: Full=Protein LATE ELONGATED HYPOCOTYL;;	PF00249.28;;PF13921.3;;PF15963.2	Myb_DNA-binding;;Myb_DNA-bind_6;;Myb_DNA-bind_7	Myb-like DNA-binding domain;;Myb-like DNA-binding domain;;Myb DNA-binding like
TRINITY_DN58225_c1_g1	2.81699	-0.95396	1.86001	553	GO:0003677;;GO:0003677;;GO:0003677;	molecular_function;;molecular_function;;molecular_function;;	MF:DNA binding;;MF:DNA binding;;MF:DNA binding;;	K09422	MYBP	------	------	------	------	XP_020703289.1	myb-related protein Zm38-like [Dendrobium catenatum]	gi|75107028|sp|P81393.1|MYB08_ANTMA;;	RecName: Full=Myb-related protein 308;;	PF00249.28;;PF13921.3	Myb_DNA-binding;;Myb_DNA-bind_6	Myb-like DNA-binding domain;;Myb-like DNA-binding domain
TRINITY_DN63921_c6_g1	3.2736	-0.75442	2.51648	1087	GO:0003677;	molecular_function;;	MF:DNA binding;;	K09422	MYBP	------	------	------	------	XP_008795321.1	PREDICTED: transcription factor MYB44-like [Phoenix dactylifera]	gi|75333678|sp|Q9FDW1.1|MYB44_ARATH;;	RecName: Full=Transcription factor MYB44; AltName: Full=Myb-related protein 44; Short=AtMYB44; AltName: Full=Myb-related protein R1; Short=AtMYBR1;;	PF00249.28;;PF13921.3	Myb_DNA-binding;;Myb_DNA-bind_6	Myb-like DNA-binding domain;;Myb-like DNA-binding domain
TRINITY_DN56464_c2_g2	3.65209	-1.10709	2.54281	1020	GO:0006355;;GO:0006351;;GO:0006355;;GO:0006351;;GO:0006355;;GO:0006351;;GO:0005634;;GO:0005634;;GO:0005634;;GO:0003677;;GO:0003677;;GO:0003677;	biological_process;;biological_process;;biological_process;;biological_process;;biological_process;;biological_process;;cellular_component;;cellular_component;;cellular_component;;molecular_function;;molecular_function;;molecular_function;;	BP:regulation of transcription, DNA-templated;;BP:transcription, DNA-templated;;BP:regulation of transcription, DNA-templated;;BP:transcription, DNA-templated;;BP:regulation of transcription, DNA-templated;;BP:transcription, DNA-templated;;CC:nucleus;;CC:nucleus;;CC:nucleus;;MF:DNA binding;;MF:DNA binding;;MF:DNA binding;;	------	------	------	------	------	------	CBI16094.3	unnamed protein product, partial [Vitis vinifera]	gi|75337463|sp|Q9SNB4.1|PCL1_ARATH;;	RecName: Full=Transcription factor LUX; AltName: Full=Protein LUX ARRHYTHMO; AltName: Full=Protein PHYTOCLOCK 1;;	PF00249.28	Myb_DNA-binding	Myb-like DNA-binding domain
TRINITY_DN57679_c2_g2	4.51922	-0.414281	4.10308	726	GO:0003677;;GO:0003677;	molecular_function;;molecular_function;;	MF:DNA binding;;MF:DNA binding;;	K09422	MYBP	------	------	------	------	XP_010268044.1	PREDICTED: myb-related protein P-like [Nelumbo nucifera]	gi|75317981|sp|O22264.1|MYB12_ARATH;;	RecName: Full=Transcription factor MYB12; AltName: Full=Myb-related protein 12; Short=AtMYB12;;	PF00249.28	Myb_DNA-binding	Myb-like DNA-binding domain
TRINITY_DN43447_c3_g3	4.59365	-0.962791	3.62791	441	GO:0003677;;GO:0003677;;GO:0003677;;GO:0003677;	molecular_function;;molecular_function;;molecular_function;;molecular_function;;	MF:DNA binding;;MF:DNA binding;;MF:DNA binding;;MF:DNA binding;;	K09422	MYBP	------	------	------	------	AMN15101.1	R2R3 MYB transcription factor [Elaeis guineensis]	gi|75107028|sp|P81393.1|MYB08_ANTMA;;	RecName: Full=Myb-related protein 308;;	PF00249.28;;PF13921.3	Myb_DNA-binding;;Myb_DNA-bind_6	Myb-like DNA-binding domain;;Myb-like DNA-binding domain
TRINITY_DN44333_c4_g3	5.39846	-2.11842	3.27659	1063	GO:0003677;;GO:0003677;;GO:0003677;	molecular_function;;molecular_function;;molecular_function;;	MF:DNA binding;;MF:DNA binding;;MF:DNA binding;;	K09422	MYBP	------	------	------	------	XP_008791485.1	PREDICTED: transcription repressor MYB5-like [Phoenix dactylifera]	gi|75319412|sp|Q38850.1|MYB5_ARATH;;	RecName: Full=Transcription repressor MYB5; AltName: Full=AtM2; AltName: Full=Myb-related protein 5; Short=AtMYB5;;	PF00249.28;;PF13921.3	Myb_DNA-binding;;Myb_DNA-bind_6	Myb-like DNA-binding domain;;Myb-like DNA-binding domain
Zinc finger
TRINITY_DN43960_c5_g2	-2.12178	0.371092	-1.75343	6413	GO:0046872;;GO:0046872;;GO:0046872;	molecular_function;;molecular_function;;molecular_function;;	MF:metal ion binding;;MF:metal ion binding;;MF:metal ion binding;;	------	------	------	------	------	------	XP_008812314.1	PREDICTED: LOW QUALITY PROTEIN: zinc finger CCCH domain-containing protein ZFN-like [Phoenix dactylifera]	gi|122207693|sp|Q2R4J4.2|C3H63_ORYSJ;;	RecName: Full=Zinc finger CCCH domain-containing protein 63; Short=OsC3H63;;	PF00642.21;;PF16131.2;;PF14608.3	zf-CCCH;;Torus;;zf-CCCH_2	Zinc finger C-x8-C-x5-C-x3-H type;;Torus domain;;RNA-binding, Nab2-type zinc finger
TRINITY_DN59156_c3_g4	1.95579	-1.53414	0.427698	494	GO:0003700;;GO:0043565;;GO:0008270;;GO:0003700;;GO:0043565;;GO:0008270;	molecular_function;;molecular_function;;molecular_function;;molecular_function;;molecular_function;;molecular_function;;	MF:transcription factor activity, sequence-specific DNA binding;;MF:sequence-specific DNA binding;;MF:zinc ion binding;;MF:transcription factor activity, sequence-specific DNA binding;;MF:sequence-specific DNA binding;;MF:zinc ion binding;;	------	------	------	------	------	------	XP_020570577.1	GATA transcription factor 4-like [Phalaenopsis equestris]	gi|71660752|sp|Q9SV30.1|GATA8_ARATH;;	RecName: Full=GATA transcription factor 8;;	PF00320.24	GATA	GATA zinc finger
TRINITY_DN64408_c4_g1	2.67558	0.183743	2.85162	3084	GO:0005622;;GO:0005634;;GO:0008270;;GO:0008270;	cellular_component;;cellular_component;;molecular_function;;molecular_function;;	CC:intracellular;;CC:nucleus;;MF:zinc ion binding;;MF:zinc ion binding;;	------	------	------	------	------	------	XP_020264346.1	zinc finger protein CONSTANS-LIKE 9-like [Asparagus officinalis]	gi|17433067|sp|Q9LUA9.1|COL10_ARATH;;	RecName: Full=Zinc finger protein CONSTANS-LIKE 10;;	PF06203.11;;PF00643.21	CCT;;zf-B_box	CCT motif;;B-box zinc finger
TRINITY_DN44819_c3_g3	4.02964	-1.70987	2.30973	680	GO:0003700;;GO:0043565;;GO:0008270;;GO:0003700;;GO:0043565;;GO:0008270;	molecular_function;;molecular_function;;molecular_function;;molecular_function;;molecular_function;;molecular_function;;	MF:transcription factor activity, sequence-specific DNA binding;;MF:sequence-specific DNA binding;;MF:zinc ion binding;;MF:transcription factor activity, sequence-specific DNA binding;;MF:sequence-specific DNA binding;;MF:zinc ion binding;;	------	------	------	------	------	------	XP_020241508.1	putative GATA transcription factor 22 isoform X1 [Asparagus officinalis]	gi|71660811|sp|Q9SZI6.1|GAT22_ARATH;;	RecName: Full=Putative GATA transcription factor 22;;	PF00320.24	GATA	GATA zinc finger
TRINITY_DN57150_c6_g1	7.68053	-1.11587	6.57693	2647	------	------	------	------	------	------	------	------	------	PKU69179.1	Protein LOL1 [Dendrobium catenatum]	gi|122222103|sp|Q0J7V9.1|LSD1_ORYSJ;;	RecName: Full=Protein LSD1; AltName: Full=Protein LESION SIMULATING DISEASE 1; Short=OsLSD1; AltName: Full=Putative zinc finger LSD1;;	PF06943.9	zf-LSD1	LSD1 zinc finger
WRKY
TRINITY_DN44180_c3_g2	-4.98911	1.66043	-3.326	882	GO:0006351;;GO:0005634;;GO:0003700;;GO:0043565;	biological_process;;cellular_component;;molecular_function;;molecular_function;;	BP:transcription, DNA-templated;;CC:nucleus;;MF:transcription factor activity, sequence-specific DNA binding;;MF:sequence-specific DNA binding;;	------	------	------	------	------	------	XP_020242404.1	probable WRKY transcription factor 50 [Asparagus officinalis]	gi|29839580|sp|Q8VWQ5.1|WRK50_ARATH;;	RecName: Full=Probable WRKY transcription factor 50; AltName: Full=WRKY DNA-binding protein 50;;	PF03106.12	WRKY	WRKY DNA -binding domain
TRINITY_DN60608_c2_g1	-3.48694	1.43207	-2.06285	700	GO:0006351;;GO:0006351;;GO:0005634;;GO:0005634;;GO:0003700;;GO:0043565;;GO:0003700;;GO:0043565;	biological_process;;biological_process;;cellular_component;;cellular_component;;molecular_function;;molecular_function;;molecular_function;;molecular_function;;	BP:transcription, DNA-templated;;BP:transcription, DNA-templated;;CC:nucleus;;CC:nucleus;;MF:transcription factor activity, sequence-specific DNA binding;;MF:sequence-specific DNA binding;;MF:transcription factor activity, sequence-specific DNA binding;;MF:sequence-specific DNA binding;;	K13424	WRKY33	map04016;;map04626	MAPK signaling pathway - plant;;Plant-pathogen interaction	------	------	XP_024639114.1	WRKY transcription factor WRKY24 isoform X1 [Medicago truncatula]	gi|148887455|sp|Q8S8P5.2|WRK33_ARATH;;	RecName: Full=Probable WRKY transcription factor 33; AltName: Full=WRKY DNA-binding protein 33;;	PF03106.12	WRKY	WRKY DNA -binding domain
TRINITY_DN54406_c1_g1	-3.19955	1.42194	-1.78598	443	GO:0006351;;GO:0005634;;GO:0003700;;GO:0043565;	biological_process;;cellular_component;;molecular_function;;molecular_function;;	BP:transcription, DNA-templated;;CC:nucleus;;MF:transcription factor activity, sequence-specific DNA binding;;MF:sequence-specific DNA binding;;	K13424	WRKY33	map04016;;map04626	MAPK signaling pathway - plant;;Plant-pathogen interaction	------	------	XP_010921056.1	PREDICTED: WRKY transcription factor WRKY24 [Elaeis guineensis]	gi|148887455|sp|Q8S8P5.2|WRK33_ARATH;;	RecName: Full=Probable WRKY transcription factor 33; AltName: Full=WRKY DNA-binding protein 33;;	PF03106.12	WRKY	WRKY DNA -binding domain
TRINITY_DN58213_c6_g1	-2.50759	-0.266974	-2.78104	1246	GO:0006351;;GO:0006351;;GO:0005634;;GO:0005634;;GO:0003700;;GO:0043565;;GO:0003700;;GO:0043565;	biological_process;;biological_process;;cellular_component;;cellular_component;;molecular_function;;molecular_function;;molecular_function;;molecular_function;;	BP:transcription, DNA-templated;;BP:transcription, DNA-templated;;CC:nucleus;;CC:nucleus;;MF:transcription factor activity, sequence-specific DNA binding;;MF:sequence-specific DNA binding;;MF:transcription factor activity, sequence-specific DNA binding;;MF:sequence-specific DNA binding;;	------	------	------	------	------	------	CDP08702.1	unnamed protein product [Coffea canephora]	gi|29839626|sp|Q9FL62.1|WRK30_ARATH;;	RecName: Full=Probable WRKY transcription factor 30; AltName: Full=WRKY DNA-binding protein 30;;	PF03106.12	WRKY	WRKY DNA -binding domain
TRINITY_DN55559_c2_g2	-2.12181	0.500594	-1.62673	1603	GO:0006351;;GO:0006351;;GO:0005634;;GO:0005634;;GO:0003700;;GO:0043565;;GO:0003700;;GO:0043565;	biological_process;;biological_process;;cellular_component;;cellular_component;;molecular_function;;molecular_function;;molecular_function;;molecular_function;;	BP:transcription, DNA-templated;;BP:transcription, DNA-templated;;CC:nucleus;;CC:nucleus;;MF:transcription factor activity, sequence-specific DNA binding;;MF:sequence-specific DNA binding;;MF:transcription factor activity, sequence-specific DNA binding;;MF:sequence-specific DNA binding;;	------	------	------	------	------	------	XP_020271550.1	probable WRKY transcription factor 70 [Asparagus officinalis]	gi|29839674|sp|Q9SHB5.1|WRK55_ARATH;;	RecName: Full=WRKY transcription factor 55; AltName: Full=WRKY DNA-binding protein 55;;	PF03106.12	WRKY	WRKY DNA -binding domain
NAC
TRINITY_DN50972_c4_g1	-3.40976	0.35341	-3.05177	887	GO:0006355;;GO:0006351;;GO:0006355;;GO:0006351;;GO:0006355;;GO:0006351;;GO:0005634;;GO:0005634;;GO:0005634;;GO:0003677;;GO:0003677;;GO:0003677;	biological_process;;biological_process;;biological_process;;biological_process;;biological_process;;biological_process;;cellular_component;;cellular_component;;cellular_component;;molecular_function;;molecular_function;;molecular_function;;	BP:regulation of transcription, DNA-templated;;BP:transcription, DNA-templated;;BP:regulation of transcription, DNA-templated;;BP:transcription, DNA-templated;;BP:regulation of transcription, DNA-templated;;BP:transcription, DNA-templated;;CC:nucleus;;CC:nucleus;;CC:nucleus;;MF:DNA binding;;MF:DNA binding;;MF:DNA binding;;	------	------	------	------	------	------	XP_020254563.1	NAC transcription factor 29-like, partial [Asparagus officinalis]	gi|425936383|sp|A0SPJ6.1|NAMB2_TRITD;;	RecName: Full=NAC transcription factor NAM-B2; Short=TtNAM-B2;;	PF02365.12	NAM	No apical meristem
TRINITY_DN47336_c1_g1	-2.53432	0.0953474	-2.44084	1738	GO:0006355;;GO:0006351;;GO:1901002;;GO:1902584;;GO:0045893;;GO:0006351;;GO:0006355;;GO:0006351;;GO:0005634;;GO:0005634;;GO:0005634;;GO:0003677;;GO:0043565;;GO:0003677;	biological_process;;biological_process;;biological_process;;biological_process;;biological_process;;biological_process;;biological_process;;biological_process;;cellular_component;;cellular_component;;cellular_component;;molecular_function;;molecular_function;;molecular_function;;	BP:regulation of transcription, DNA-templated;;BP:transcription, DNA-templated;;BP:positive regulation of response to salt stress;;BP:positive regulation of response to water deprivation;;BP:positive regulation of transcription, DNA-templated;;BP:transcription, DNA-templated;;BP:regulation of transcription, DNA-templated;;BP:transcription, DNA-templated;;CC:nucleus;;CC:nucleus;;CC:nucleus;;MF:DNA…	------	------	------	------	------	------	XP_010918221.2	PREDICTED: NAC domain-containing protein 35-like [Elaeis guineensis]	gi|75217017|sp|Q9ZVP8.2|NAC35_ARATH;;	RecName: Full=NAC domain-containing protein 35; Short=ANAC035; AltName: Full=Protein LONG VEGETATIVE PHASE 1; Short=AtLOV1;;	PF02365.12	NAM	No apical meristem
TRINITY_DN64279_c4_g1	-2.23293	-0.405199	-2.64352	885	GO:0006355;;GO:0006351;;GO:0006355;;GO:0006351;;GO:0016021;;GO:0005634;;GO:0016021;;GO:0005634;;GO:0003677;;GO:0003677;	biological_process;;biological_process;;biological_process;;biological_process;;cellular_component;;cellular_component;;cellular_component;;cellular_component;;molecular_function;;molecular_function;;	BP:regulation of transcription, DNA-templated;;BP:transcription, DNA-templated;;BP:regulation of transcription, DNA-templated;;BP:transcription, DNA-templated;;CC:integral component of membrane;;CC:nucleus;;CC:integral component of membrane;;CC:nucleus;;MF:DNA binding;;MF:DNA binding;;	------	------	------	------	------	------	XP_008796459.1	PREDICTED: NAC domain-containing protein 17-like [Phoenix dactylifera]	gi|75215689|sp|Q9XIC5.1|NAC17_ARATH;;	RecName: Full=NAC domain-containing protein 17; Short=ANAC017; AltName: Full=Protein NTM1-like 7; AltName: Full=Protein REGULATORS OF AOX1A 2;;	PF02365.12	NAM	No apical meristem
TRINITY_DN44738_c1_g3	6.73104	-1.52082	5.20808	1153	GO:0006355;;GO:0006351;;GO:0006355;;GO:0006351;;GO:0006355;;GO:0006351;;GO:0005634;;GO:0005634;;GO:0005634;;GO:0003677;;GO:0003677;;GO:0003677;	biological_process;;biological_process;;biological_process;;biological_process;;biological_process;;biological_process;;cellular_component;;cellular_component;;cellular_component;;molecular_function;;molecular_function;;molecular_function;;	BP:regulation of transcription, DNA-templated;;BP:transcription, DNA-templated;;BP:regulation of transcription, DNA-templated;;BP:transcription, DNA-templated;;BP:regulation of transcription, DNA-templated;;BP:transcription, DNA-templated;;CC:nucleus;;CC:nucleus;;CC:nucleus;;MF:DNA binding;;MF:DNA binding;;MF:DNA binding;;	------	------	------	------	------	------	XP_009382004.1	PREDICTED: NAC domain-containing protein 21/22 [Musa acuminata subsp. malaccensis]	gi|51316422|sp|Q84TE6.2|NAC22_ARATH;;	RecName: Full=NAC domain-containing protein 21/22; Short=ANAC021/ANAC022;;	PF02365.12	NAM	No apical meristem
GRF
TRINITY_DN57252_c2_g1	-5.36667	4.35734	-1.00729	1007	------	------	------	------	------	------	------	------	------	------	------	------	------	PF08879.7	WRC	WRC
TRINITY_DN63768_c1_g3	-3.37511	-0.0176981	-3.39661	836	GO:0032502;;GO:0006355;;GO:0006351;;GO:0032502;;GO:0006355;;GO:0006351;;GO:0032502;;GO:0006355;;GO:0006351;;GO:0005634;;GO:0005634;;GO:0005634;;GO:0005524;;GO:0005524;;GO:0005524;	biological_process;;biological_process;;biological_process;;biological_process;;biological_process;;biological_process;;biological_process;;biological_process;;biological_process;;cellular_component;;cellular_component;;cellular_component;;molecular_function;;molecular_function;;molecular_function;;	BP:developmental process;;BP:regulation of transcription, DNA-templated;;BP:transcription, DNA-templated;;BP:developmental process;;BP:regulation of transcription, DNA-templated;;BP:transcription, DNA-templated;;BP:developmental process;;BP:regulation of transcription, DNA-templated;;BP:transcription, DNA-templated;;CC:nucleus;;CC:nucleus;;CC:nucleus;;MF:ATP binding;;MF:ATP binding;;MF:ATP bindin…	------	------	------	------	------	------	XP_010933923.1	PREDICTED: growth-regulating factor 10-like [Elaeis guineensis]	gi|75120352|sp|Q6AWX7.1|GRF12_ORYSJ;;	RecName: Full=Growth-regulating factor 12; Short=OsGRF12; AltName: Full=Transcription activator GRF12;;	PF08879.7;;PF08880.8	WRC;;QLQ	WRC;;QLQ
TRINITY_DN54496_c2_g1	3.27954	-0.983872	2.28772	1198	GO:0032502;;GO:0006351;;GO:0005634;	biological_process;;biological_process;;cellular_component;;	BP:developmental process;;BP:transcription, DNA-templated;;CC:nucleus;;	------	------	------	------	------	------	XP_009393679.1	PREDICTED: uncharacterized protein LOC103979309 isoform X3 [Musa acuminata subsp. malaccensis]	------	------	PF08879.7	WRC	WRC
B3
TRINITY_DN59927_c0_g1	-4.63473	0.609437	-4.0226	1618	GO:0006355;;GO:0006351;;GO:0006355;;GO:0006351;;GO:0006355;;GO:0006351;;GO:0005634;;GO:0005634;;GO:0005634;;GO:0003677;;GO:0003677;;GO:0003677;	biological_process;;biological_process;;biological_process;;biological_process;;biological_process;;biological_process;;cellular_component;;cellular_component;;cellular_component;;molecular_function;;molecular_function;;molecular_function;;	BP:regulation of transcription, DNA-templated;;BP:transcription, DNA-templated;;BP:regulation of transcription, DNA-templated;;BP:transcription, DNA-templated;;BP:regulation of transcription, DNA-templated;;BP:transcription, DNA-templated;;CC:nucleus;;CC:nucleus;;CC:nucleus;;MF:DNA binding;;MF:DNA binding;;MF:DNA binding;;	------	------	------	------	------	------	EEF46818.1	DNA binding protein, putative [Ricinus communis]	gi|347602439|sp|P0DH85.1|REM10_ARATH;;	RecName: Full=B3 domain-containing protein REM10; AltName: Full=Protein REPRODUCTIVE MERISTEM 10;;	PF02362.18	B3	B3 DNA binding domain
TRINITY_DN55564_c0_g3	-4.13067	1.3488	-2.77694	953	GO:0006351;;GO:0006351;;GO:0005634;;GO:0005634;;GO:0003677;;GO:0003700;;GO:0003677;;GO:0003700;	biological_process;;biological_process;;cellular_component;;cellular_component;;molecular_function;;molecular_function;;molecular_function;;molecular_function;;	BP:transcription, DNA-templated;;BP:transcription, DNA-templated;;CC:nucleus;;CC:nucleus;;MF:DNA binding;;MF:transcription factor activity, sequence-specific DNA binding;;MF:DNA binding;;MF:transcription factor activity, sequence-specific DNA binding;;	K09287	RAV	------	------	------	------	PPS05322.1	hypothetical protein GOBAR_AA15342 [Gossypium barbadense]	gi|75340021|sp|P82280.1|RAV2_ARATH;;	RecName: Full=AP2/ERF and B3 domain-containing transcription repressor RAV2; AltName: Full=Ethylene-responsive transcription factor RAV2; AltName: Full=Protein RELATED TO ABI3/VP1 2; AltName: Full=Protein RELATED TO APETALA2 8; AltName: Full=Protein TEMPRANILLO 2;;	PF02362.18;;PF00847.17	B3;;AP2	B3 DNA binding domain;;AP2 domain
bHLH
TRINITY_DN49035_c3_g4	-8.87191	3.07921	-5.7626	2074	------	------	------	------	------	------	------	------	------	XP_019704669.1	PREDICTED: putative transcription factor bHLH041 [Elaeis guineensis]	gi|75311566|sp|Q9LTS4.1|BH041_ARATH;;	RecName: Full=Putative transcription factor bHLH041; AltName: Full=Basic helix-loop-helix protein 41; Short=AtbHLH41; Short=bHLH 41; AltName: Full=Transcription factor EN 51; AltName: Full=bHLH transcription factor bHLH041;;	PF00010.23	HLH	Helix-loop-helix DNA-binding domain
TRINITY_DN49816_c0_g7	-2.22331	-0.127616	-2.3526	1649	GO:0046983;;GO:0046983;;GO:0046983;	molecular_function;;molecular_function;;molecular_function;;	MF:protein dimerization activity;;MF:protein dimerization activity;;MF:protein dimerization activity;;	K13422	MYC2	map04016;;map04075	MAPK signaling pathway - plant;;Plant hormone signal transduction	------	------	XP_010919958.1	PREDICTED: transcription factor MYC2-like [Elaeis guineensis]	gi|122248973|sp|Q336P5.1|MYC2_ORYSJ;;	RecName: Full=Transcription factor MYC2; Short=OsMYC2; AltName: Full=Basic helix-loop-helix protein 9; Short=OsbHLH009; Short=bHLH 9;;	PF14215.3;;PF00010.23	bHLH-MYC_N;;HLH	bHLH-MYC and R2R3-MYB transcription factors N-terminal;;Helix-loop-helix DNA-binding domain
HSF
TRINITY_DN57795_c1_g6	-2.52647	0.0650133	-2.46798	886	GO:0005634;;GO:0003700;;GO:0043565;	cellular_component;;molecular_function;;molecular_function;;	CC:nucleus;;MF:transcription factor activity, sequence-specific DNA binding;;MF:sequence-specific DNA binding;;	K09419	HSFF	------	------	------	------	PSS16367.1	Heat stress transcription factor A-4b like [Actinidia chinensis var. chinensis]	gi|11386827|sp|Q40152.1|HSF8_SOLLC;;	RecName: Full=Heat shock factor protein HSF8; AltName: Full=Heat shock transcription factor 8; Short=HSTF 8; AltName: Full=Heat stress transcription factor;;	PF00447.14	HSF_DNA-bind	HSF-type DNA-binding
TRINITY_DN64733_c1_g8	-2.10683	0.0135988	-2.0994	651	GO:0005634;;GO:0005634;;GO:0005634;;GO:0003700;;GO:0043565;;GO:0003700;;GO:0043565;;GO:0003700;;GO:0043565;	cellular_component;;cellular_component;;cellular_component;;molecular_function;;molecular_function;;molecular_function;;molecular_function;;molecular_function;;molecular_function;;	CC:nucleus;;CC:nucleus;;CC:nucleus;;MF:transcription factor activity, sequence-specific DNA binding;;MF:sequence-specific DNA binding;;MF:transcription factor activity, sequence-specific DNA binding;;MF:sequence-specific DNA binding;;MF:transcription factor activity, sequence-specific DNA binding;;MF:sequence-specific DNA binding;;	K09419;K09414	HSF1;HSFF	------	------	------	------	XP_010916598.1	PREDICTED: heat stress transcription factor A-4b-like [Elaeis guineensis]	gi|75306599|sp|Q94J16.1|HFA4B_ORYSJ;;	RecName: Full=Heat stress transcription factor A-4b; AltName: Full=Heat stress transcription factor 4; Short=OsHsf-04; AltName: Full=Heat stress transcription factor 9; Short=rHsf9;;	PF00447.14	HSF_DNA-bind	HSF-type DNA-binding
GRAS
TRINITY_DN48814_c3_g3	-4.39097	-0.0287754	-4.42643	1135	GO:0006355;;GO:0006351;	biological_process;;biological_process;;	BP:regulation of transcription, DNA-templated;;BP:transcription, DNA-templated;;	------	------	------	------	------	------	XP_020266017.1	LOW QUALITY PROTEIN: scarecrow-like protein 9, partial [Asparagus officinalis]	gi|75099994|sp|O80933.1|SCL9_ARATH;;	RecName: Full=Scarecrow-like protein 9; Short=AtSCL9; AltName: Full=GRAS family protein 13; Short=AtGRAS-13;;	PF03514.11	GRAS	GRAS domain family
Nin-like
TRINITY_DN47012_c5_g4	-3.74855	4.306	0.556307	3331	GO:0006355;;GO:0006351;;GO:0005634;;GO:0003677;	biological_process;;biological_process;;cellular_component;;molecular_function;;	BP:regulation of transcription, DNA-templated;;BP:transcription, DNA-templated;;CC:nucleus;;MF:DNA binding;;	------	------	------	------	------	------	XP_020260990.1	protein NLP1-like [Asparagus officinalis]	gi|313471347|sp|Q10S83.1|NLP1_ORYSJ;;	RecName: Full=Protein NLP1; Short=OsNLP1; AltName: Full=NIN-like protein 1; AltName: Full=Nodule inception protein-like protein 1;;	PF02042.12;;PF00564.21	RWP-RK;;PB1	RWP-RK domain;;PB1 domain
CAMTA
TRINITY_DN64098_c2_g3	-3.00624	0.801172	-2.21569	7424	GO:0015074;;GO:0015074;;GO:0003676;;GO:0003676;	biological_process;;biological_process;;molecular_function;;molecular_function;;	BP:DNA integration;;BP:DNA integration;;MF:nucleic acid binding;;MF:nucleic acid binding;;	K05674;K20477	RGP1;ABCC10	map02010	ABC transporters	------	------	CAN76196.1	hypothetical protein VITISV_041073 [Vitis vinifera]	gi|75324343|sp|Q6NPP4.1|CMTA2_ARATH;;	RecName: Full=Calmodulin-binding transcription activator 2; AltName: Full=Ethylene-induced calmodulin-binding protein c; Short=AtER66; Short=EICBP.c; AltName: Full=Signal-responsive protein 4;;	PF00665.23;;PF07727.11;;PF03859.13	rve;;RVT_2;;CG-1	Integrase core domain;;Reverse transcriptase;;CG-1 domain
bZIP
TRINITY_DN61114_c2_g3	-2.90951	-0.364033	-3.27332	4184	------	------	------	K09060	GBF	------	------	------	------	ONK69827.1	uncharacterized protein A4U43_C05F27150 [Asparagus officinalis]	gi|1169081|sp|Q99089.1|CPRF1_PETCR;;	RecName: Full=Common plant regulatory factor 1; Short=CPRF-1;;	PF00170.18;;PF16596.2;;PF07777.8	bZIP_1;;MFMR_assoc;;MFMR	bZIP transcription factor;;Disordered region downstream of MFMR;;G-box binding protein MFMR
BES1
TRINITY_DN44023_c1_g5	2.18845	-0.74451	1.44059	2653	GO:0009742;;GO:0006351;;GO:0009742;;GO:0006351;;GO:0009742;;GO:0006351;;GO:0003700;;GO:0003700;;GO:0003700;	biological_process;;biological_process;;biological_process;;biological_process;;biological_process;;biological_process;;molecular_function;;molecular_function;;molecular_function;;	BP:brassinosteroid mediated signaling pathway;;BP:transcription, DNA-templated;;BP:brassinosteroid mediated signaling pathway;;BP:transcription, DNA-templated;;BP:brassinosteroid mediated signaling pathway;;BP:transcription, DNA-templated;;MF:transcription factor activity, sequence-specific DNA binding;;MF:transcription factor activity, sequence-specific DNA binding;;MF:transcription factor activ…	K14503	BZR1_2	map04075	Plant hormone signal transduction	------	------	PKA59914.1	BES1/BZR1 like protein 2 [Apostasia shenzhenica]	gi|57012618|sp|Q9LN63.1|BZR2_ARATH;;	RecName: Full=Protein BRASSINAZOLE-RESISTANT 2; AltName: Full=Protein 107; AltName: Full=Protein BIN2 SUBSTRATE 1; AltName: Full=Protein BRI1-EMS-SUPPRESSOR 1;;	PF05687.10	BES1_N	BES1/BZR1 plant transcription factor, N-terminal
